# Supplementary material for: An atrial fibrillation-associated regulatory region modulates cardiac Tbx5 levels and arrhythmia susceptibility
Source: eLife. 2023 Jan 30;12:e80317. doi: 10.7554/eLife.80317 (PMC9928424; doi:10.7554/eLife.80317)
Supplement: Supplementary file 1. — Changed motifs in red. [file elife-80317-supp1.xlsx]

## Sheet: Sheet1
Supplementary file 1. rs7312625 motif analysis +- 30 bp. Changed motifs in red.
Variant	Pos motif hit	Detected sequence	Detected motif	Strand	Detected motif match
rs7312625 - A	-19	CCTGGTCGGAGC	At1g19210(AP2EREBP)/colamp-At1g19210-DAP-Seq(GSE60143)/Homer	-	6.70925
rs7312625 - G	-19	CCTGGTCGGAGC	At1g19210(AP2EREBP)/colamp-At1g19210-DAP-Seq(GSE60143)/Homer	-	6.70925
rs7312625 - A	-13	GAGCCACCAT	At2g33710(AP2EREBP)/colamp-At2g33710-DAP-Seq(GSE60143)/Homer	-	5.37014
rs7312625 - G	-13	GAGCCACCAT	At2g33710(AP2EREBP)/colamp-At2g33710-DAP-Seq(GSE60143)/Homer	-	5.37014
rs7312625 - A	-13	GAGCCACCAT	ERF7(AP2EREBP)/col-ERF7-DAP-Seq(GSE60143)/Homer	-	5.32042
rs7312625 - G	-13	GAGCCACCAT	ERF7(AP2EREBP)/col-ERF7-DAP-Seq(GSE60143)/Homer	-	5.32042
rs7312625 - A	-9	CTGTTTCAAACC	TCX2(CPP)/colamp-TCX2-DAP-Seq(GSE60143)/Homer	+	7.10424
rs7312625 - A	-6	TTTCAAACCC	AT2G20110(CPP)/colamp-AT2G20110-DAP-Seq(GSE60143)/Homer	+	6.58915
rs7312625 - A	-6	TTTCAAACCC	SOL1(CPP)/colamp-SOL1-DAP-Seq(GSE60143)/Homer	+	6.42925
rs7312625 - A	-3	ATCTCCTGTTTC	MA1508.1 IKZF1	-	7.61324
rs7312625 - G	-3	ATCTCCTGTTTC	MA1508.1 IKZF1	-	7.61324
rs7312625 - A	-3	ATCTCCTGTTTC	Six2(Homeobox)/NephronProgenitor-Six2-ChIP-Seq(GSE39837)/Homer	-	7.25473
rs7312625 - G	-3	ATCTCCTGTTTC	Six2(Homeobox)/NephronProgenitor-Six2-ChIP-Seq(GSE39837)/Homer	-	7.25473
rs7312625 - G	1	ATCTCCTGTTTCAGAC	MA1119.1 SIX2	-	7.97715
rs7312625 - A	1	TGTTTCAAAC	SOL1(CPP)/colamp-SOL1-DAP-Seq(GSE60143)/Homer	-	6.5502
rs7312625 - A	3	TTTCAAACCC	CHR(?)/Hela-CellCycle-Expression/Homer	-	9.31228
rs7312625 - A	3	CCATGACAGC	Meis1(Homeobox)/MastCells-Meis1-ChIP-Seq(GSE48085)/Homer	+	6.32395
rs7312625 - G	3	CCATGACAGC	Meis1(Homeobox)/MastCells-Meis1-ChIP-Seq(GSE48085)/Homer	+	6.32395
rs7312625 - A	4	GTTTCAAACCCC	TCX2(CPP)/colamp-TCX2-DAP-Seq(GSE60143)/Homer	-	7.13219
rs7312625 - A	5	ATGACAG	MA0498.2 MEIS1	+	7.14342
rs7312625 - G	5	ATGACAG	MA0498.2 MEIS1	+	7.14342
rs7312625 - A	5	ATGACAGC	MA0774.1 MEIS2	+	8.22022
rs7312625 - G	5	ATGACAGC	MA0774.1 MEIS2	+	8.22022
rs7312625 - A	5	ATGACAGC	MA0775.1 MEIS3	+	7.71188
rs7312625 - G	5	ATGACAGC	MA0775.1 MEIS3	+	7.71188
rs7312625 - A	5	ATGACAGC	Tgif1(Homeobox)/mES-Tgif1-ChIP-Seq(GSE55404)/Homer	+	5.42689
rs7312625 - G	5	ATGACAGC	Tgif1(Homeobox)/mES-Tgif1-ChIP-Seq(GSE55404)/Homer	+	5.42689
rs7312625 - A	6	TGACAGCCTT	bZIP18(bZIP)/colamp-bZIP18-DAP-Seq(GSE60143)/Homer	+	5.87018
rs7312625 - G	6	TGACAGCCTT	bZIP18(bZIP)/colamp-bZIP18-DAP-Seq(GSE60143)/Homer	+	5.87018
rs7312625 - A	6	TGACAGCC	Tgif2(Homeobox)/mES-Tgif2-ChIP-Seq(GSE55404)/Homer	+	5.49465
rs7312625 - G	6	TGACAGCC	Tgif2(Homeobox)/mES-Tgif2-ChIP-Seq(GSE55404)/Homer	+	5.49465
rs7312625 - A	11	TGACAG	PMID_26875865 Tbx5-3p-LZ	-	7.96109
rs7312625 - G	11	TGACAG	PMID_26875865 Tbx5-3p-LZ	-	7.96109
rs7312625 - A	11	CATGACAG	Tgif1(Homeobox)/mES-Tgif1-ChIP-Seq(GSE55404)/Homer	-	5.75309
rs7312625 - G	11	CATGACAG	Tgif1(Homeobox)/mES-Tgif1-ChIP-Seq(GSE55404)/Homer	-	5.75309
rs7312625 - A	12	CCTTTCAA	PMID_26875865 Nkx2-5-CP-LZ	+	2.05983
rs7312625 - G	12	CCTTTCAA	PMID_26875865 Nkx2-5-CP-LZ	+	2.05983
rs7312625 - A	13	CATGACAGCC	Meis1(Homeobox)/MastCells-Meis1-ChIP-Seq(GSE48085)/Homer	-	6.6245
rs7312625 - G	13	CATGACAGCC	Meis1(Homeobox)/MastCells-Meis1-ChIP-Seq(GSE48085)/Homer	-	6.6245
rs7312625 - A	14	TTTCAATGGG	EGL-5(Homeobox)/cElegans-L3-EGL5-ChIP-Seq(modEncode)/Homer	+	6.32242
rs7312625 - G	14	TTTCAATGGG	EGL-5(Homeobox)/cElegans-L3-EGL5-ChIP-Seq(modEncode)/Homer	+	6.32242
rs7312625 - A	24	TTCAATGGGT	Nanog(Homeobox)/mES-Nanog-ChIP-Seq(GSE11724)/Homer	-	4.81432
rs7312625 - G	24	TTCAATGGGT	Nanog(Homeobox)/mES-Nanog-ChIP-Seq(GSE11724)/Homer	-	4.81432
