# Supplementary material for: An atrial fibrillation-associated regulatory region modulates cardiac Tbx5 levels and arrhythmia susceptibility
Source: eLife. 2023 Jan 30;12:e80317. doi: 10.7554/eLife.80317 (PMC9928424; doi:10.7554/eLife.80317)
Supplement: Supplementary file 2. [file elife-80317-supp2.xlsx]

## Sheet: Sheet1
Supplemental Table 2. DESeq2 result WT v Tbx5RE(int)KO adult left atria
Ensembl Gene ID	EntrezGene ID	Associated Gene Name	Base mean	Log2FC (+ is higher in RE(int)-/-)	StdErr	Wald-Stats	P-value	P-adj
ENSMUSG00000023905	27279	Tnfrsf12a	940.123	-2.6082	0.175365	14.873	4.93542e-50	7.33107e-46
ENSMUSG00000024803	107765	Ankrd1	56376.1	-1.43742	0.098438	14.6023	2.71407e-48	2.01574e-44
ENSMUSG00000022816	14314	Fstl1	6834.23	-1.34434	0.10385	12.945	2.50785e-38	1.24172e-34
ENSMUSG00000031994	30806	Adamts8	2049.23	-2.41505	0.190505	12.6771	7.91962e-37	2.94095e-33
ENSMUSG00000026193	14268	Fn1	9731.23	-1.27445	0.118697	10.737	6.82345e-27	2.02711e-23
ENSMUSG00000031636	53318	Pdlim3	1901.65	-1.24095	0.119841	10.355	3.97387e-25	9.83798e-22
ENSMUSG00000039115	104099	Itga9	1783.9	-1.27274	0.125714	10.1241	4.31953e-24	9.16604e-21
ENSMUSG00000021136	64075	Smoc1	1102.43	-1.50631	0.149189	10.0967	5.71431e-24	1.061e-20
ENSMUSG00000021614	13003	Vcan	2670.07	-1.27816	0.131144	9.74624	1.91421e-22	3.15929e-19
ENSMUSG00000039004	12161	Bmp6	690.29	-1.70981	0.175735	9.72948	2.25754e-22	3.35335e-19
ENSMUSG00000030116	50530	Mfap5	1023.06	-1.39285	0.144448	9.64257	5.28469e-22	7.13626e-19
ENSMUSG00000054728	218194	Phactr1	800.847	1.04373	0.109872	-9.49956	2.10776e-21	2.60905e-18
ENSMUSG00000024008	240058	Cpne5	540.835	1.53609	0.165793	-9.2651	1.94896e-20	2.22691e-17
ENSMUSG00000060187	237560	Lrrc10	2664.59	-1.64417	0.178294	9.22164	2.92595e-20	3.10443e-17
ENSMUSG00000021870	83997	Slmap	6957.03	-0.980216	0.10795	9.0803	1.08278e-19	1.07224e-16
ENSMUSG00000032902	20501	Slc16a1	7528.05	-1.0073	0.112461	8.95687	3.3401e-19	2.84298e-16
ENSMUSG00000045967	241263	Gpr158	817.469	1.21547	0.135754	-8.95346	3.44511e-19	2.84298e-16
ENSMUSG00000027858	70747	Tspan2	670.379	-1.27799	0.142727	8.95411	3.42486e-19	2.84298e-16
ENSMUSG00000046694	100342	Fam46b	827.994	-1.85494	0.211099	8.78705	1.53545e-18	1.2004e-15
ENSMUSG00000055976	71908	Cldn23	78.5987	-2.32652	0.265818	8.7523	2.09057e-18	1.55267e-15
ENSMUSG00000031849	12845	Comp	736.453	-1.41414	0.162079	8.72497	2.6624e-18	1.88321e-15
ENSMUSG00000039835	215819	Nhsl1	1091.71	0.950989	0.109779	-8.66279	4.60351e-18	3.10821e-15
ENSMUSG00000061718	19049	Ppp1r1b	1221.46	0.981084	0.113491	-8.64461	5.39873e-18	3.48664e-15
ENSMUSG00000028339	12819	Col15a1	5662.17	-1.06349	0.123142	8.63631	5.80585e-18	3.59334e-15
ENSMUSG00000027955	68659	Fam198b	1877.98	-1.06169	0.123723	8.5812	9.38915e-18	5.57865e-15
ENSMUSG00000030208	13730	Emp1	1902.29	-0.993014	0.1167	8.50913	1.75246e-17	1.00119e-14
ENSMUSG00000037820	21817	Tgm2	10245.6	-1.06637	0.126582	8.42432	3.6284e-17	1.99616e-14
ENSMUSG00000070424	11875	Art5	617.417	1.24309	0.148452	-8.37371	5.58325e-17	2.96192e-14
ENSMUSG00000046818	73284	Ddit4l	179.49	1.84005	0.221803	-8.29585	1.0781e-16	5.52209e-14
ENSMUSG00000020644	15902	Id2	444.946	-1.18734	0.143749	8.25982	1.45893e-16	6.99063e-14
ENSMUSG00000028341	18124	Nr4a3	223.804	-1.91134	0.232051	8.23673	1.76979e-16	8.21513e-14
ENSMUSG00000070348	12443	Ccnd1	906.521	-1.6549	0.20201	8.19218	2.56541e-16	1.15475e-13
ENSMUSG00000018822	54612	Sfrp5	423.151	1.42809	0.17674	-8.08016	6.46802e-16	2.82577e-13
ENSMUSG00000026814	13805	Eng	5881.6	-1.23565	0.153772	8.0356	9.312e-16	3.95201e-13
ENSMUSG00000032487	19225	Ptgs2	274.745	-1.39991	0.174484	8.02316	1.03055e-15	4.25216e-13
ENSMUSG00000024486	15200	Hbegf	470.994	-1.57676	0.197905	7.96722	1.62278e-15	6.51479e-13
ENSMUSG00000022206	18162	Npr3	15514.6	-1.13486	0.142629	7.95674	1.76636e-15	6.90463e-13
ENSMUSG00000036040	77794	Adamtsl2	1538.38	-1.57845	0.200332	7.87919	3.29523e-15	1.25506e-12
ENSMUSG00000033595	213469	Lgi3	85.6957	1.57835	0.20044	-7.87443	3.42292e-15	1.2711e-12
ENSMUSG00000039361	233489	Picalm	5912.72	-1.3076	0.167332	7.8144	5.52259e-15	2.00079e-12
ENSMUSG00000042436	76293	Mfap4	1085.66	-1.20739	0.155038	7.78766	6.82599e-15	2.41412e-12
ENSMUSG00000038173	320981	Enpp6	656.973	-1.24679	0.161643	7.71321	1.22693e-14	4.23832e-12
ENSMUSG00000001930	22371	Vwf	8680.03	-1.21806	0.158233	7.69794	1.38282e-14	4.66827e-12
ENSMUSG00000021983	50769	Atp8a2	446.813	1.03905	0.135156	-7.68776	1.49729e-14	4.9424e-12
ENSMUSG00000036086	226409	Zranb3	223.806	1.14067	0.148844	-7.66351	1.80915e-14	5.84198e-12
ENSMUSG00000029675	13717	Eln	1715.14	-1.4327	0.189128	7.57528	3.5834e-14	1.13251e-11
ENSMUSG00000056367	242894	Actr3b	482.735	1.0079	0.133727	-7.53703	4.80807e-14	1.4879e-11
ENSMUSG00000027435	17064	Cd93	5058.24	-0.980105	0.130703	7.49872	6.4445e-14	1.9536e-11
ENSMUSG00000022665	67896	Ccdc80	8193.66	-0.875297	0.117117	7.47369	7.79744e-14	2.31646e-11
ENSMUSG00000018593	20692	Sparc	5524.32	-0.883205	0.120019	7.35885	1.85502e-13	5.40284e-11
ENSMUSG00000063275	30963	Ptpla	407.634	-1.18946	0.161855	7.34896	1.99748e-13	5.70587e-11
ENSMUSG00000026043	12825	Col3a1	22786.7	-1.11992	0.152588	7.33948	2.14419e-13	6.00939e-11
ENSMUSG00000032231	12306	Anxa2	2493.65	-1.04159	0.142336	7.31788	2.51917e-13	6.92957e-11
ENSMUSG00000053166	104010	Cdh22	256.582	1.62407	0.222653	-7.29418	3.00484e-13	8.11525e-11
ENSMUSG00000047485	245683	Klhl34	451.674	-1.56069	0.214321	7.28203	3.28842e-13	8.72254e-11
ENSMUSG00000018217	18858	Pmp22	1650.05	-0.814278	0.112229	7.25552	4.00125e-13	1.04271e-10
ENSMUSG00000074059	546161	Fbxw18	249.405	-1.15191	0.159542	7.22011	5.19465e-13	1.33037e-10
ENSMUSG00000020044	21859	Timp3	19194.1	-0.89464	0.124052	7.21182	5.52108e-13	1.36683e-10
ENSMUSG00000034675	56320	Dbn1	377.942	-1.11017	0.154035	7.20724	5.70974e-13	1.39037e-10
ENSMUSG00000027377	228576	Mall	133.602	-1.43377	0.199272	7.19503	6.24454e-13	1.49607e-10
ENSMUSG00000031825	78892	Crispld2	3226.01	-0.791359	0.110579	7.15652	8.27507e-13	1.95108e-10
ENSMUSG00000001493	17285	Meox1	231.117	-1.45858	0.204437	7.13462	9.70528e-13	2.25254e-10
ENSMUSG00000028273	56376	Pdlim5	16221.9	-0.800685	0.112881	7.09318	1.31064e-12	2.99511e-10
ENSMUSG00000005611	17540	Mrvi1	1095.2	1.09353	0.154405	-7.08221	1.41877e-12	3.19308e-10
ENSMUSG00000029580	11461	Actb	11157.1	-1.00314	0.141882	7.0702	1.54712e-12	3.43e-10
ENSMUSG00000007122	12372	Casq1	2252.15	-1.35962	0.19283	7.05086	1.77814e-12	3.88419e-10
ENSMUSG00000032064	330938	Dixdc1	557.535	0.972206	0.137951	-7.04747	1.82201e-12	3.92235e-10
ENSMUSG00000038777	20360	Sema6c	699.401	0.971351	0.138568	-7.00993	2.38432e-12	5.05953e-10
ENSMUSG00000034845	84094	Plvap	2768.62	-1.1093	0.158609	6.99392	2.6731e-12	5.59243e-10
ENSMUSG00000054690	59308	Emcn	2377.18	-1.20016	0.173562	6.91489	4.68211e-12	9.65946e-10
ENSMUSG00000036545	216725	Adamts2	1346.58	-0.848383	0.123747	6.85576	7.09354e-12	1.44339e-09
ENSMUSG00000020181	260315	Nav3	308.726	0.976368	0.143184	-6.81898	9.16879e-12	1.81591e-09
ENSMUSG00000040247	108995	Tbc1d10c	287.33	1.136	0.166562	-6.8203	9.08513e-12	1.81591e-09
ENSMUSG00000028613	16975	Lrp8	312.025	-1.11934	0.164338	6.81122	9.6775e-12	1.89144e-09
ENSMUSG00000063564	237759	Col23a1	401.002	-1.09965	0.161491	6.80933	9.80518e-12	1.89151e-09
ENSMUSG00000031328	192176	Flna	9476.17	-0.871673	0.128772	6.76911	1.29576e-11	2.4676e-09
ENSMUSG00000037458	54375	Azin1	3546.09	-0.752669	0.11205	6.71726	1.85169e-11	3.48165e-09
ENSMUSG00000019817	22634	Plagl1	774.597	-0.89588	0.133413	6.71507	1.87976e-11	3.49024e-09
ENSMUSG00000038156	233744	Spon1	2360.49	-0.874603	0.130658	6.69386	2.17367e-11	3.98613e-09
ENSMUSG00000022885	20440	St6gal1	763.73	-1.10563	0.166576	6.6374	3.19265e-11	5.64568e-09
ENSMUSG00000026042	12832	Col5a2	2266.67	-0.926003	0.139507	6.63768	3.18655e-11	5.64568e-09
ENSMUSG00000031799	326618	Tpm4	2050.76	-1.00672	0.151726	6.63513	3.24215e-11	5.66575e-09
ENSMUSG00000054871	72309	Tmem158	109.556	-1.43515	0.216414	6.6315	3.32302e-11	5.73955e-09
ENSMUSG00000027248	14827	Pdia3	4288.39	-0.668867	0.101619	6.5821	4.63838e-11	7.91936e-09
ENSMUSG00000039661	66959	Dusp26	43.1454	1.73982	0.264409	-6.58001	4.70414e-11	7.94038e-09
ENSMUSG00000030787	114332	Lyve1	1865.4	-1.22226	0.187117	6.53207	6.48665e-11	1.08262e-08
ENSMUSG00000027887	17306	Sypl2	147.598	1.47748	0.227135	-6.50487	7.77582e-11	1.28336e-08
ENSMUSG00000050840	23836	Cdh20	39.7945	1.57931	0.242963	-6.5002	8.02157e-11	1.30937e-08
ENSMUSG00000038633	13244	Degs1	2373.54	-0.791316	0.121781	6.49783	8.14843e-11	1.31562e-08
ENSMUSG00000068614	11464	Actc1	102408	-0.901486	0.138777	6.49592	8.25275e-11	1.31813e-08
ENSMUSG00000026638	54139	Irf6	438.334	-0.947296	0.146297	6.47516	9.47098e-11	1.49662e-08
ENSMUSG00000019732	73316	Calr3	852.572	0.827675	0.127957	-6.4684	9.90439e-11	1.54863e-08
ENSMUSG00000067377	56496	Tspan6	490.586	-1.25742	0.194731	6.4572	1.06655e-10	1.65026e-08
ENSMUSG00000013089	104156	Etv5	231.487	-1.14521	0.1777	6.44464	1.15874e-10	1.77442e-08
ENSMUSG00000051236	320183	Msrb3	4631.07	-0.645427	0.100196	6.44165	1.1818e-10	1.79127e-08
ENSMUSG00000001240	54409	Ramp2	1264.24	-1.16728	0.181533	6.43014	1.27486e-10	1.9128e-08
ENSMUSG00000019122	20308	Ccl9	328.818	-1.33525	0.207755	6.42706	1.30099e-10	1.93249e-08
ENSMUSG00000040721	239102	Zfhx2	89.3802	1.25207	0.19532	-6.41037	1.45166e-10	2.11401e-08
ENSMUSG00000024899	23972	Papss2	621.227	-0.923971	0.144242	6.40569	1.49692e-10	2.15876e-08
ENSMUSG00000026483	63913	Fam129a	922.632	-0.692797	0.108569	6.38114	1.7577e-10	2.48656e-08
ENSMUSG00000024654	66514	Asrgl1	977.221	0.827803	0.129709	-6.38197	1.7482e-10	2.48656e-08
ENSMUSG00000016382	102866	Pls3	1445.95	-0.833776	0.131183	6.35581	2.07338e-10	2.90546e-08
ENSMUSG00000026640	18845	Plxna2	2195.75	-0.873994	0.137767	6.34402	2.23851e-10	3.07878e-08
ENSMUSG00000041445	105450	Mmrn2	2975.46	-0.947562	0.149922	6.32039	2.60912e-10	3.55558e-08
ENSMUSG00000027894	229706	Slc6a17	277.718	1.09495	0.173306	-6.31802	2.64938e-10	3.57763e-08
ENSMUSG00000038702	319901	Dsel	667.264	-0.90224	0.142986	6.30997	2.79087e-10	3.73474e-08
ENSMUSG00000003814	12317	Calr	4525.28	-0.779587	0.123797	6.29729	3.02899e-10	4.0172e-08
ENSMUSG00000020717	18613	Pecam1	9921.03	-1.08444	0.17248	6.28736	3.22908e-10	4.24467e-08
ENSMUSG00000029231	18595	Pdgfra	4699.46	-0.647455	0.103037	6.28374	3.30533e-10	4.30679e-08
ENSMUSG00000048120	12495	Entpd1	1300.49	-1.27879	0.204215	6.262	3.80068e-10	4.86683e-08
ENSMUSG00000048218	105827	Amigo2	465.356	-0.988796	0.157887	6.26269	3.78404e-10	4.86683e-08
ENSMUSG00000032925	223272	Itgbl1	675.947	-0.83715	0.133769	6.25819	3.89468e-10	4.94458e-08
ENSMUSG00000079243	22437	Xirp1	10821	-1.15317	0.18478	6.24079	4.35379e-10	5.48061e-08
ENSMUSG00000000753	20317	Serpinf1	965.21	-0.917872	0.147394	6.22733	4.74449e-10	5.92224e-08
ENSMUSG00000026558	80914	Uck2	578.884	-0.952429	0.153284	6.21351	5.1815e-10	6.36083e-08
ENSMUSG00000026728	22352	Vim	8502.32	-0.734909	0.118912	6.1803	6.39801e-10	7.72651e-08
ENSMUSG00000079465	12828	Col4a3	407.494	-0.809274	0.13191	6.13503	8.51449e-10	1.00376e-07
ENSMUSG00000042851	78751	Zc3h6	542.907	0.865088	0.140982	-6.13615	8.45446e-10	1.00376e-07
ENSMUSG00000030703	68616	Gdpd3	617.551	0.740492	0.120807	-6.12957	8.81188e-10	1.03064e-07
ENSMUSG00000031486	78560	Gpr124	1280.12	-0.759576	0.124091	6.12113	9.29114e-10	1.07821e-07
ENSMUSG00000031448	234072	Adprhl1	2714.64	-0.817041	0.133579	6.11653	9.56325e-10	1.10118e-07
ENSMUSG00000038668	14745	Lpar1	703.688	-0.751985	0.123115	6.10798	1.00898e-09	1.15288e-07
ENSMUSG00000035722	27403	Abca7	882.278	0.824258	0.135039	-6.10384	1.03547e-09	1.16045e-07
ENSMUSG00000027004	20378	Frzb	397.53	-0.906717	0.148562	6.10329	1.03905e-09	1.16045e-07
ENSMUSG00000021991	12294	Cacna2d3	291.62	0.948759	0.155437	-6.10383	1.03557e-09	1.16045e-07
ENSMUSG00000074207	11522	Adh1	741.307	-1.18916	0.195117	6.0946	1.09712e-09	1.20715e-07
ENSMUSG00000030536	29875	Iqgap1	4077.33	-0.561543	0.0921261	6.09537	1.09183e-09	1.20715e-07
ENSMUSG00000050295	17300	Foxc1	942.583	-1.03282	0.169812	6.08216	1.18577e-09	1.29511e-07
ENSMUSG00000071226	330409	Cecr2	244.94	0.938719	0.154459	-6.07744	1.22115e-09	1.32401e-07
ENSMUSG00000039005	21898	Tlr4	1108.78	-1.02431	0.168695	6.07198	1.2634e-09	1.35989e-07
ENSMUSG00000002346	73095	Slc25a42	568.065	0.83542	0.137867	-6.05961	1.36448e-09	1.45813e-07
ENSMUSG00000001494	74499	Sost	43.2698	-1.72359	0.28482	6.05151	1.43493e-09	1.52246e-07
ENSMUSG00000050296	74591	Abca12	292.159	0.936045	0.154939	-6.0414	1.52787e-09	1.57783e-07
ENSMUSG00000030268	12035	Bcat1	88.7873	-1.45993	0.241662	6.04121	1.5296e-09	1.57783e-07
ENSMUSG00000032177	18577	Pde4a	1342.01	0.990507	0.163927	-6.04238	1.51858e-09	1.57783e-07
ENSMUSG00000089945	11641	Gm20459	8136.21	-0.789192	0.130625	6.04166	1.52538e-09	1.57783e-07
ENSMUSG00000038729	11641	Akap2	8136.21	-0.789192	0.130625	6.04166	1.52538e-09	1.57783e-07
ENSMUSG00000029685	78910	Asb15	686.287	1.07573	0.178174	-6.03755	1.56476e-09	1.60296e-07
ENSMUSG00000004891	18008	Nes	992.386	-0.932108	0.155019	6.01286	1.82277e-09	1.85448e-07
ENSMUSG00000000058	12390	Cav2	1302.24	-0.873515	0.145427	6.00653	1.89533e-09	1.91518e-07
ENSMUSG00000040265	103967	Dnm3	141.654	1.05525	0.175833	-6.00143	1.95588e-09	1.96301e-07
ENSMUSG00000044042	14260	Fmn1	1970.08	0.800049	0.133498	-5.99297	2.06045e-09	2.05409e-07
ENSMUSG00000017969	19223	Ptgis	1505.78	-0.848073	0.141652	5.98702	2.13721e-09	2.1164e-07
ENSMUSG00000015932	56431	Dstn	3585.72	-0.754467	0.12616	5.98024	2.2281e-09	2.1918e-07
ENSMUSG00000024084	70536	Qpct	263.141	-1.08921	0.182171	5.97903	2.24472e-09	2.19362e-07
ENSMUSG00000036256	29817	Igfbp7	3022.73	-0.72388	0.121253	5.97	2.37258e-09	2.30342e-07
ENSMUSG00000085272	381835	Gm1078	19825.9	0.644254	0.108267	-5.95059	2.67174e-09	2.56039e-07
ENSMUSG00000024395	225341	Lims2	2664.2	-0.87968	0.147948	5.94587	2.74998e-09	2.61848e-07
ENSMUSG00000045930	66864	Clec14a	1052.85	-0.72725	0.122599	5.93196	2.99345e-09	2.83214e-07
ENSMUSG00000058672	22151	Tubb2a	395.379	-1.017	0.171937	5.91495	3.31971e-09	3.10132e-07
ENSMUSG00000024087	13078	Cyp1b1	1621.34	-1.06494	0.180133	5.91196	3.38054e-09	3.1384e-07
ENSMUSG00000046841	216197	Ckap4	1155.08	-0.900709	0.152691	5.89892	3.65898e-09	3.3758e-07
ENSMUSG00000090799	546611	Klhl33	230.697	0.932438	0.15818	-5.89479	3.7516e-09	3.43989e-07
ENSMUSG00000036052	56323	Dnajb5	2023.91	-0.943276	0.160105	5.89161	3.82446e-09	3.4705e-07
ENSMUSG00000050505	219257	Pcdh20	71.2007	-1.35593	0.230158	5.8913	3.8317e-09	3.4705e-07
ENSMUSG00000050211	329502	Pla2g4e	1006.5	0.744325	0.126536	-5.88233	4.04539e-09	3.64183e-07
ENSMUSG00000061535	109323	C1qtnf7	498.925	-0.739946	0.126154	5.86542	4.47994e-09	4.00874e-07
ENSMUSG00000027712	11747	Anxa5	1586.4	-0.627145	0.106964	5.86313	4.54227e-09	4.04017e-07
ENSMUSG00000027381	12125	Bcl2l11	423.771	0.74887	0.127872	-5.8564	4.73005e-09	4.15741e-07
ENSMUSG00000021701	20620	Plk2	1035.37	-0.746004	0.127376	5.85671	4.72129e-09	4.15741e-07
ENSMUSG00000037996	76376	Slc24a2	578.699	1.0086	0.172651	-5.84182	5.1633e-09	4.51151e-07
ENSMUSG00000091402	217874	BC048943	126.931	1.30638	0.223766	-5.83816	5.27791e-09	4.58469e-07
ENSMUSG00000035783	11475	Acta2	2743.79	-1.64233	0.281565	5.83286	5.44837e-09	4.70524e-07
ENSMUSG00000056201	12631	Cfl1	895.805	-0.657637	0.112913	5.82426	5.73672e-09	4.92562e-07
ENSMUSG00000006800	72043	Sulf2	3326.25	-0.636407	0.109353	5.81976	5.89325e-09	5.03094e-07
ENSMUSG00000029201	22235	Ugdh	583.593	-0.697756	0.119976	5.8158	6.03464e-09	5.1222e-07
ENSMUSG00000022456	24050	37865	107.449	1.09811	0.189079	-5.80767	6.33498e-09	5.34658e-07
ENSMUSG00000047878	239559	A4galt	287.555	-0.829391	0.142865	5.80543	6.42024e-09	5.38792e-07
ENSMUSG00000023036	93724	Pcdhga9	303.217	0.78396	0.135502	-5.78559	7.22596e-09	6.03002e-07
ENSMUSG00000015944	80909	Gatsl2	892.5	0.790403	0.136651	-5.7841	7.29004e-09	6.04951e-07
ENSMUSG00000018927	20305	Ccl6	504.326	-1.14857	0.199115	5.76836	8.00454e-09	6.60552e-07
ENSMUSG00000029597	231691	Sds	1632.9	0.765199	0.132706	-5.76613	8.11133e-09	6.65667e-07
ENSMUSG00000028906	269587	Epb4.1	6509.7	0.608113	0.106202	-5.72599	1.0283e-08	8.39248e-07
ENSMUSG00000037664	12577	Cdkn1c	552.552	-0.796656	0.139199	5.72314	1.04574e-08	8.4882e-07
ENSMUSG00000024048	67268	Myl12a	1388.88	-0.853012	0.149187	5.71772	1.07961e-08	8.66842e-07
ENSMUSG00000002602	26362	Axl	6819.48	-0.805371	0.140853	5.71782	1.07897e-08	8.66842e-07
ENSMUSG00000058587	50875	Tmod3	1971.35	-0.725734	0.126977	5.71546	1.09409e-08	8.73744e-07
ENSMUSG00000063239	268934	Grm4	21.5965	1.58509	0.27817	-5.69829	1.21017e-08	9.61276e-07
ENSMUSG00000020009	15979	Ifngr1	1656.84	-0.704049	0.12363	5.69481	1.23511e-08	9.75865e-07
ENSMUSG00000025780	209378	Itih5	1024.59	-0.738157	0.129986	5.67872	1.35707e-08	1.06656e-06
ENSMUSG00000051098	72852	Mblac2	109.199	1.05047	0.185236	-5.671	1.41966e-08	1.10987e-06
ENSMUSG00000026879	227753	Gsn	104008	-0.897339	0.15849	5.66182	1.49777e-08	1.16481e-06
ENSMUSG00000025492	66141	Ifitm3	1018.18	-0.71843	0.126936	5.65978	1.51565e-08	1.17257e-06
ENSMUSG00000020027	216233	Socs2	848.157	-0.72848	0.129232	5.63699	1.73044e-08	1.33181e-06
ENSMUSG00000001119	12833	Col6a1	2500.24	-0.830966	0.147453	5.63545	1.74601e-08	1.33686e-06
ENSMUSG00000028476	53614	Reck	696.711	-0.74877	0.133075	5.62669	1.83705e-08	1.38725e-06
ENSMUSG00000036181	50708	Hist1h1c	2398.18	0.752538	0.133751	-5.62642	1.83983e-08	1.38725e-06
ENSMUSG00000004939	69564	Itgb1bp3	990.067	-1.10019	0.195579	5.62529	1.85198e-08	1.38936e-06
ENSMUSG00000017631	109934	Abr	1836.77	0.547779	0.0975843	-5.61339	1.98396e-08	1.48089e-06
ENSMUSG00000034245	232232	Hdac11	865.253	0.805826	0.143579	-5.61242	1.99518e-08	1.48182e-06
ENSMUSG00000024617	12322	Camk2a	688.108	0.81678	0.145633	-5.60849	2.04098e-08	1.5083e-06
ENSMUSG00000040003	50791	Magi2	268.439	0.802379	0.143115	-5.60655	2.06401e-08	1.51776e-06
ENSMUSG00000020571	71853	Pdia6	2421.83	-0.649613	0.115987	5.60073	2.13447e-08	1.56184e-06
ENSMUSG00000026564	240892	Dusp27	1713.41	-0.732907	0.131004	5.59454	2.21206e-08	1.61068e-06
ENSMUSG00000031673	12552	Cdh11	1366.09	-0.756996	0.135499	5.58672	2.31403e-08	1.67671e-06
ENSMUSG00000029095	231148	Ablim2	843.257	0.95485	0.171019	-5.5833	2.36001e-08	1.70173e-06
ENSMUSG00000050931	74442	Sgms2	184.229	-1.077	0.193095	5.57759	2.43867e-08	1.74995e-06
ENSMUSG00000069763	67888	Tmem100	673.982	-1.22107	0.219107	5.57291	2.50516e-08	1.78902e-06
ENSMUSG00000022037	12759	Clu	44310	0.559104	0.100436	-5.56678	2.5949e-08	1.84424e-06
ENSMUSG00000048126	12835	Col6a3	2054.42	-0.919356	0.165307	5.56152	2.67433e-08	1.89165e-06
ENSMUSG00000054966	74071	Ifltd1	28.2243	1.47972	0.266522	-5.55197	2.82464e-08	1.98849e-06
ENSMUSG00000027293	98878	Ehd4	30031.3	-0.517605	0.093248	5.55084	2.84296e-08	1.99195e-06
ENSMUSG00000027797	13175	Dclk1	354.913	-0.834599	0.150405	5.54903	2.87261e-08	2.00328e-06
ENSMUSG00000037206	26968	Islr	716.632	-0.830521	0.149834	5.54294	2.97439e-08	2.06456e-06
ENSMUSG00000019929	13179	Dcn	32007.4	-0.756689	0.13657	5.54068	3.01292e-08	2.08158e-06
ENSMUSG00000001870	268977	Ltbp1	3389.54	-0.645982	0.116686	5.53608	3.0932e-08	2.12715e-06
ENSMUSG00000062929	12632	Cfl2	7128.95	-0.720783	0.130439	5.52584	3.27915e-08	2.24463e-06
ENSMUSG00000013698	18611	Pea15a	3173.51	-0.545167	0.0986801	5.52458	3.30267e-08	2.25036e-06
ENSMUSG00000001604	21401	Tcea3	799.587	0.684029	0.123998	-5.51645	3.4591e-08	2.33552e-06
ENSMUSG00000029581	14086	Fscn1	229.954	-0.91721	0.166316	5.51487	3.4904e-08	2.34599e-06
ENSMUSG00000004698	79221	Hdac9	784.61	0.707837	0.128385	-5.51339	3.51993e-08	2.35518e-06
ENSMUSG00000004665	12798	Cnn2	1205.88	-0.878934	0.159574	5.508	3.62931e-08	2.41748e-06
ENSMUSG00000030317	110595	Timp4	397.039	-0.890449	0.161769	5.50446	3.70294e-08	2.4446e-06
ENSMUSG00000031097	21953	Tnni2	254.682	-0.966248	0.175534	5.50463	3.69949e-08	2.4446e-06
ENSMUSG00000002028	214162	Mll1	2957.96	0.672384	0.122209	-5.50192	3.7567e-08	2.45835e-06
ENSMUSG00000027800	17112	Tm4sf1	2983.4	-0.891935	0.162114	5.50192	3.75687e-08	2.45835e-06
ENSMUSG00000035049	107094	Rrp12	462.896	-0.905998	0.165151	5.48588	4.11426e-08	2.68041e-06
ENSMUSG00000027962	22329	Vcam1	1902.41	-1.10627	0.201755	5.48324	4.17609e-08	2.70881e-06
ENSMUSG00000020814	67622	Mxra7	287.823	-0.732808	0.133989	5.46917	4.52145e-08	2.92007e-06
ENSMUSG00000042675	66090	Ypel3	721.353	0.623775	0.114184	-5.46291	4.68384e-08	3.01185e-06
ENSMUSG00000026478	226519	Lamc1	14244.4	-0.748981	0.13736	5.45269	4.96129e-08	3.17651e-06
ENSMUSG00000025665	67071	Rps6ka6	257.32	1.20356	0.220873	-5.44911	5.06221e-08	3.21893e-06
ENSMUSG00000051067	237403	Lingo3	62.0158	1.18524	0.217523	-5.44881	5.07089e-08	3.21893e-06
ENSMUSG00000027808	28146	Serp1	1244.58	-0.739833	0.135846	5.4461	5.14852e-08	3.2543e-06
ENSMUSG00000061436	15258	Hipk2	1939.48	0.736933	0.135374	-5.44366	5.21953e-08	3.27212e-06
ENSMUSG00000037826	243382	Ppm1k	6666.01	0.725765	0.133324	-5.44362	5.22076e-08	3.27212e-06
ENSMUSG00000026527	24012	Rgs7	514.656	-0.74705	0.137324	5.44006	5.32641e-08	3.32431e-06
ENSMUSG00000026479	16782	Lamc2	258.695	-0.979402	0.180258	5.43334	5.5309e-08	3.43749e-06
ENSMUSG00000025409	110962	Mbd6	185.263	0.9199	0.169447	-5.42883	5.67257e-08	3.51085e-06
ENSMUSG00000036862	233651	Dchs1	1366.18	-0.831649	0.15341	5.4211	5.92325e-08	3.65079e-06
ENSMUSG00000028444	12804	Cntfr	567.032	0.822842	0.152177	-5.40714	6.40376e-08	3.93064e-06
ENSMUSG00000027750	50706	Postn	2398.81	-0.879898	0.162766	5.40592	6.44761e-08	3.94126e-06
ENSMUSG00000001473	67951	Tubb6	665.366	-0.850061	0.157296	5.40422	6.50895e-08	3.96246e-06
ENSMUSG00000047658	545276	Gal3st3	107.044	1.15998	0.215552	-5.38143	7.38961e-08	4.48022e-06
ENSMUSG00000022122	13618	Ednrb	863.017	-0.637092	0.118476	5.37739	7.5573e-08	4.56326e-06
ENSMUSG00000036053	71409	Fmnl2	573.216	-0.721413	0.134368	5.36895	7.91981e-08	4.74358e-06
ENSMUSG00000020695	17534	Mrc2	1559.21	-0.725264	0.135071	5.36949	7.89617e-08	4.74358e-06
ENSMUSG00000028385	209131	Snx30	787.822	-0.630871	0.117635	5.36294	8.18773e-08	4.88436e-06
ENSMUSG00000015143	109711	Actn1	1125.3	-0.763863	0.142542	5.35885	8.37542e-08	4.96224e-06
ENSMUSG00000048332	108927	Lhfp	1804.84	-0.617022	0.115145	5.35864	8.38509e-08	4.96224e-06
ENSMUSG00000026415	64435	Fcamr	356.007	0.680761	0.127128	-5.35491	8.55986e-08	5.02896e-06
ENSMUSG00000032290	56294	Ptpn9	470.66	-0.709512	0.1325	5.35479	8.56556e-08	5.02896e-06
ENSMUSG00000046182	269994	Gsg1l	72.8603	1.14607	0.214169	-5.35125	8.73476e-08	5.10812e-06
ENSMUSG00000024085	17158	Man2a1	1723.89	-0.859743	0.160809	5.34635	8.97443e-08	5.22769e-06
ENSMUSG00000044770	268297	Scml4	153.719	-0.971326	0.181762	5.34394	9.09455e-08	5.27697e-06
ENSMUSG00000002900	16777	Lamb1	5089.45	-0.678928	0.127125	5.34064	9.26169e-08	5.35304e-06
ENSMUSG00000029019	18158	Nppb	9678.89	-1.4667	0.27472	5.33888	9.35226e-08	5.38444e-06
ENSMUSG00000040605	56175	Bace2	594.957	-0.904837	0.169551	5.33666	9.46751e-08	5.42974e-06
ENSMUSG00000024754	83921	Tmem2	3326.28	-0.990101	0.185767	5.32982	9.8312e-08	5.61664e-06
ENSMUSG00000027375	17153	Mal	539.435	-1.12587	0.211453	5.32443	1.01269e-07	5.76342e-06
ENSMUSG00000006386	21687	Tek	3135.54	-0.56522	0.106538	5.30533	1.12472e-07	6.37653e-06
ENSMUSG00000001525	22154	Tubb5	1040.41	-0.817036	0.154195	5.29872	1.16616e-07	6.58638e-06
ENSMUSG00000020048	22027	Hsp90b1	10621.4	-0.609885	0.115237	5.29245	1.2069e-07	6.79066e-06
ENSMUSG00000057440	75739	Mpp7	662.828	-0.825391	0.156021	5.29027	1.22138e-07	6.84618e-06
ENSMUSG00000040820	110948	Hlcs	331.38	0.697085	0.132021	-5.28011	1.29104e-07	7.20945e-06
ENSMUSG00000044006	68709	Cilp2	3050.24	-0.653776	0.124051	5.27021	1.36271e-07	7.58118e-06
ENSMUSG00000057751	230971	Megf6	897.742	-0.856955	0.163117	5.25361	1.49146e-07	8.26646e-06
ENSMUSG00000048376	14062	F2r	2557.92	-0.776398	0.147982	5.24659	1.54942e-07	8.52411e-06
ENSMUSG00000062329	231162	Cytl1	2360.35	-0.932606	0.177818	5.24471	1.56525e-07	8.55746e-06
ENSMUSG00000063558	11761	Aox1	1320.38	0.654403	0.124779	-5.24451	1.567e-07	8.55746e-06
ENSMUSG00000043456	243937	Zfp536	333.571	0.926954	0.17695	-5.2385	1.61888e-07	8.77624e-06
ENSMUSG00000026365	12628	Cfh	20831.9	-0.711566	0.135925	5.23499	1.64995e-07	8.91215e-06
ENSMUSG00000034768	217217	Asb16	15.7288	1.47461	0.2818	-5.23282	1.66947e-07	8.98489e-06
ENSMUSG00000020623	26399	Map2k6	312.423	0.861447	0.164647	-5.23208	1.67613e-07	8.98819e-06
ENSMUSG00000025986	227059	Slc39a10	452.314	-0.699337	0.134018	5.21822	1.8065e-07	9.61784e-06
ENSMUSG00000026670	107652	Uap1	2808.27	-0.712468	0.136521	5.21875	1.80134e-07	9.61784e-06
ENSMUSG00000042804	100129	Gpr153	1093.29	-0.809697	0.155386	5.21087	1.87953e-07	9.97093e-06
ENSMUSG00000024981	433256	Acsl5	835.289	-0.631376	0.121231	5.20806	1.90827e-07	1.00873e-05
ENSMUSG00000057530	230857	Ece1	5665.13	-0.819883	0.15774	5.19769	2.01783e-07	1.06287e-05
ENSMUSG00000018171	75909	Vmp1	1527.43	-0.58499	0.112572	5.1966	2.02971e-07	1.06535e-05
ENSMUSG00000026463	381290	Atp2b4	2358.95	-0.615802	0.118548	5.19453	2.05233e-07	1.07342e-05
ENSMUSG00000059588	54598	Calcrl	1655.69	-0.792234	0.15271	5.18785	2.1274e-07	1.10879e-05
ENSMUSG00000026837	12831	Col5a1	3236.35	-0.848384	0.163579	5.18639	2.14406e-07	1.11356e-05
ENSMUSG00000070436	12406	Serpinh1	4915.24	-0.764969	0.147518	5.18561	2.15313e-07	1.11438e-05
ENSMUSG00000034205	94352	Loxl2	239.848	-0.80839	0.15592	5.18465	2.16416e-07	1.1162e-05
ENSMUSG00000025823	12304	Pdia4	1475.82	-0.551413	0.106434	5.18078	2.20957e-07	1.13567e-05
ENSMUSG00000027868	21384	Tbx15	18.6581	-1.47567	0.284895	5.1797	2.22246e-07	1.13836e-05
ENSMUSG00000032420	23959	Nt5e	996.307	-0.737275	0.142432	5.17633	2.26295e-07	1.15512e-05
ENSMUSG00000022523	14167	Fgf12	6518.09	-0.68717	0.133033	5.1654	2.39931e-07	1.21636e-05
ENSMUSG00000021280	74190	1200009I06Rik	214.902	1.00659	0.195067	-5.16022	2.46662e-07	1.24623e-05
ENSMUSG00000041949	272538	Tmco7	505.019	0.609271	0.118104	-5.15876	2.48589e-07	1.25171e-05
ENSMUSG00000024413	18145	Npc1	5145.56	0.590607	0.114541	-5.15629	2.51897e-07	1.26408e-05
ENSMUSG00000006442	20810	Srm	228.711	-0.867733	0.168495	5.1499	2.60623e-07	1.30347e-05
ENSMUSG00000020926	11488	Adam11	642.832	0.840591	0.16357	-5.13903	2.76157e-07	1.37192e-05
ENSMUSG00000067780	94227	Pi15	408.26	-1.07266	0.208727	5.13905	2.7613e-07	1.37192e-05
ENSMUSG00000032698	16909	Lmo2	813.816	-0.572547	0.111576	5.13145	2.87515e-07	1.42358e-05
ENSMUSG00000001151	18541	Pcnt	5037.77	0.549433	0.107207	-5.12495	2.97615e-07	1.4687e-05
ENSMUSG00000037972	20621	Snn	1099.72	0.532442	0.103947	-5.12225	3.01905e-07	1.48493e-05
ENSMUSG00000026062	226999	Slc9a2	481.469	0.697674	0.136475	-5.1121	3.1859e-07	1.56183e-05
ENSMUSG00000068740	53883	Celsr2	451.357	0.872954	0.171608	-5.08691	3.63936e-07	1.77826e-05
ENSMUSG00000032014	102644	Oaf	243.639	-0.850028	0.167293	5.08108	3.75303e-07	1.82779e-05
ENSMUSG00000040339	329739	Fam102b	1314.71	-0.679449	0.133971	5.07163	3.94433e-07	1.91468e-05
ENSMUSG00000031659	11513	Adcy7	1323.78	-0.721791	0.142862	5.05237	4.3635e-07	2.1044e-05
ENSMUSG00000027351	114715	Spred1	904.063	-0.692487	0.137092	5.05125	4.38936e-07	2.11002e-05
ENSMUSG00000023036	93723	Pcdhga9	269.48	0.794526	0.157389	-5.04816	4.46088e-07	2.13748e-05
ENSMUSG00000028348	68016	Murc	1299.29	-0.68633	0.136061	5.04428	4.55233e-07	2.16844e-05
ENSMUSG00000006014	96875	Prg4	168.084	1.16556	0.231071	-5.04418	4.55468e-07	2.16844e-05
ENSMUSG00000002504	65962	Slc9a3r2	2065.26	-0.890576	0.176584	5.04336	4.57435e-07	2.17085e-05
ENSMUSG00000017144	74194	Rnd3	739.317	-0.661807	0.131558	5.03053	4.89131e-07	2.31387e-05
ENSMUSG00000059854	244653	Hydin	94.0453	-1.27692	0.25395	5.02823	4.95041e-07	2.33439e-05
ENSMUSG00000021256	238328	Vash1	647.42	-0.689018	0.137084	5.02625	5.00164e-07	2.34392e-05
ENSMUSG00000021877	11843	Arf4	1612.38	-0.66177	0.131663	5.02623	5.00217e-07	2.34392e-05
ENSMUSG00000029661	12843	Col1a2	8981.66	-0.813103	0.161871	5.02316	5.08278e-07	2.3742e-05
ENSMUSG00000019960	67603	Dusp6	507.983	-0.960965	0.19153	5.01729	5.24045e-07	2.44018e-05
ENSMUSG00000063455	330286	D630045J12Rik	153.246	1.08294	0.216126	-5.0107	5.4233e-07	2.50179e-05
ENSMUSG00000025701	11689	Alox5	332.844	-0.832722	0.166209	5.01008	5.44081e-07	2.5021e-05
ENSMUSG00000022367	15117	Has2	122.659	-0.980981	0.196091	5.00268	5.6539e-07	2.59207e-05
ENSMUSG00000022462	67760	Slc38a2	6220.57	-0.955356	0.191285	4.9944	5.90188e-07	2.69743e-05
ENSMUSG00000026495	68226	Efcab2	1876.85	0.640732	0.128377	-4.99103	6.00597e-07	2.73658e-05
ENSMUSG00000028633	51797	Ctps	929.222	-0.618053	0.123994	4.98452	6.21142e-07	2.82077e-05
ENSMUSG00000034898	70598	Filip1	3297.33	-0.542662	0.108881	4.98399	6.22872e-07	2.82077e-05
ENSMUSG00000038400	65112	Pmepa1	866.634	-0.772478	0.155103	4.98044	6.34411e-07	2.8643e-05
ENSMUSG00000042190	14747	Cmklr1	962.384	-1.00129	0.201278	4.97467	6.53573e-07	2.94187e-05
ENSMUSG00000062275	382106	Fbxw24	126.288	-0.948769	0.190744	4.97404	6.55715e-07	2.94259e-05
ENSMUSG00000025647	66940	Shisa5	1252.96	-0.661269	0.133082	4.96889	6.73359e-07	3.01267e-05
ENSMUSG00000025227	75146	Tmem180	33.0824	1.28348	0.258797	-4.95939	7.07164e-07	3.14498e-05
ENSMUSG00000022099	13829	Epb4.9	213.423	-0.8803	0.177501	4.95942	7.07052e-07	3.14498e-05
ENSMUSG00000020241	12834	Col6a2	2582.73	-0.736234	0.148477	4.95858	7.10116e-07	3.14867e-05
ENSMUSG00000020142	55963	Slc1a4	313.725	-0.820514	0.165536	4.9567	7.17013e-07	3.16979e-05
ENSMUSG00000075254	77446	Heg1	6910.68	-0.629488	0.127049	4.9547	7.24415e-07	3.18214e-05
ENSMUSG00000007030	27762	D17H6S56E-3	263.105	0.780123	0.157467	-4.95421	7.26232e-07	3.18214e-05
ENSMUSG00000021390	18295	Ogn	3446.02	-0.851057	0.17175	4.95519	7.22585e-07	3.18214e-05
ENSMUSG00000026864	14828	Hspa5	14019.6	-0.536757	0.108675	4.9391	7.84835e-07	3.40875e-05
ENSMUSG00000047298	240595	Kcnv2	608.765	0.813478	0.164695	-4.93929	7.84073e-07	3.40875e-05
ENSMUSG00000031740	17390	Mmp2	5042.42	-0.656306	0.1329	4.93835	7.87849e-07	3.41187e-05
ENSMUSG00000019810	66848	Fuca2	2169.56	-0.624816	0.126562	4.93685	7.93948e-07	3.42829e-05
ENSMUSG00000091712	665119	Sec14l5	110.878	0.994248	0.201555	-4.93289	8.10216e-07	3.48839e-05
ENSMUSG00000030217	109978	Art4	225.722	-0.937941	0.190208	4.93114	8.17495e-07	3.50956e-05
ENSMUSG00000035493	21810	Tgfbi	1844.6	-0.689545	0.140039	4.92396	8.48088e-07	3.6304e-05
ENSMUSG00000042215	213539	Bag2	1166.83	-0.604647	0.122991	4.91618	8.82478e-07	3.76676e-05
ENSMUSG00000006941	68969	Eif1b	928.094	0.582258	0.1185	-4.91357	8.94341e-07	3.7988e-05
ENSMUSG00000074364	259300	Ehd2	2364.1	-0.614368	0.125039	4.9134	8.951e-07	3.7988e-05
ENSMUSG00000025026	27360	Add3	3544.14	-0.435444	0.088829	4.90204	9.48448e-07	4.01375e-05
ENSMUSG00000043067	244745	Dpy19l1	539.659	-0.621555	0.126822	4.901	9.53521e-07	4.02375e-05
ENSMUSG00000020333	216739	Acsl6	508.202	0.650233	0.132738	-4.89861	9.65154e-07	4.0613e-05
ENSMUSG00000031377	12169	Bmx	523.749	-0.746718	0.15246	4.89778	9.69259e-07	4.06705e-05
ENSMUSG00000038260	68667	Trpm4	620.421	0.652004	0.133374	-4.88853	1.01591e-06	4.24583e-05
ENSMUSG00000035296	24053	Sgcg	5718.12	0.468919	0.0959286	-4.88821	1.01758e-06	4.24583e-05
ENSMUSG00000056220	18783	Pla2g4a	594.281	-0.877013	0.179601	4.88312	1.04418e-06	4.33248e-05
ENSMUSG00000031840	19339	Rab3a	1170.63	0.554036	0.113514	-4.88078	1.05666e-06	4.37204e-05
ENSMUSG00000001833	235072	39326	3774	-0.710061	0.145499	4.88016	1.05998e-06	4.37359e-05
ENSMUSG00000033249	26386	Hsf4	75.0503	0.99034	0.20296	-4.87949	1.06361e-06	4.37641e-05
ENSMUSG00000020674	69675	Pxdn	2205.95	-0.516065	0.105798	4.87782	1.07267e-06	4.40149e-05
ENSMUSG00000034120	20382	Srsf2	1455.34	-0.504025	0.103481	4.87071	1.11199e-06	4.55028e-05
ENSMUSG00000093603	20382	Srsf2	1455.34	-0.504025	0.103481	4.87071	1.11199e-06	4.55028e-05
ENSMUSG00000052854	27206	Nrk	106.503	-0.980056	0.201269	4.86937	1.11952e-06	4.56852e-05
ENSMUSG00000046480	399548	Scn4b	689.502	0.668593	0.137383	-4.86664	1.1351e-06	4.61941e-05
ENSMUSG00000019769	64009	Syne1	4646.43	0.561918	0.115512	-4.86458	1.14701e-06	4.65509e-05
ENSMUSG00000075324	60344	Fign	667.995	0.821251	0.168975	-4.86018	1.17279e-06	4.74675e-05
ENSMUSG00000022752	28185	Tomm70a	2342.97	-0.501522	0.103255	4.85713	1.19102e-06	4.76855e-05
ENSMUSG00000026276	18000	37500	4356.6	-0.542631	0.111713	4.85736	1.1896e-06	4.76855e-05
ENSMUSG00000001123	16859	Lgals9	311.694	-0.793327	0.163283	4.8586	1.18222e-06	4.76855e-05
ENSMUSG00000032011	21838	Thy1	305.119	-0.838764	0.172662	4.85783	1.18681e-06	4.76855e-05
ENSMUSG00000022528	15205	Hes1	442.036	-0.766753	0.157924	4.8552	1.20266e-06	4.80223e-05
ENSMUSG00000023913	27226	Pla2g7	1683.66	-0.544367	0.112249	4.84961	1.23702e-06	4.92618e-05
ENSMUSG00000029714	57330	Gigyf1	830.87	0.705853	0.145692	-4.84482	1.2673e-06	5.03326e-05
ENSMUSG00000038370	66425	Pcp4l1	6287.42	0.543886	0.112296	-4.84333	1.27681e-06	5.05752e-05
ENSMUSG00000038456	209773	Dennd2a	639.246	-0.567554	0.117249	4.8406	1.29448e-06	5.11388e-05
ENSMUSG00000031618	110784	Nr3c2	1379.97	0.631976	0.130604	-4.83886	1.30584e-06	5.14327e-05
ENSMUSG00000031918	77116	Mtmr2	712.561	-0.576065	0.119061	4.83841	1.30884e-06	5.14327e-05
ENSMUSG00000015468	18132	Notch4	850.4	-0.881914	0.182332	4.83685	1.31912e-06	5.16999e-05
ENSMUSG00000037406	330723	Htra4	489.337	-0.730269	0.151009	4.83592	1.3253e-06	5.18053e-05
ENSMUSG00000039286	72007	Fndc3b	4557.24	-0.620235	0.12838	4.83126	1.35674e-06	5.2895e-05
ENSMUSG00000029761	109624	Cald1	1240.17	-0.634521	0.131483	4.82587	1.3939e-06	5.42017e-05
ENSMUSG00000073600	381148	Gm1614	5193.56	0.622119	0.128945	-4.82467	1.40234e-06	5.43872e-05
ENSMUSG00000056423	224065	Uts2d	623.441	-1.04235	0.2164	4.81678	1.45896e-06	5.64358e-05
ENSMUSG00000048473	330440	Gm766	23.7538	-1.35913	0.282261	4.81516	1.47084e-06	5.66008e-05
ENSMUSG00000030096	21366	Slc6a6	4543.29	-0.583024	0.121068	4.81566	1.46711e-06	5.66008e-05
ENSMUSG00000034522	380912	Zfp395	221.801	0.91388	0.190052	-4.80859	1.52002e-06	5.8342e-05
ENSMUSG00000026547	21346	Tagln2	684.818	-0.705042	0.146761	4.80401	1.55518e-06	5.95378e-05
ENSMUSG00000038384	208043	Setd1b	447.649	0.969283	0.201843	-4.80217	1.56952e-06	5.99324e-05
ENSMUSG00000045871	239250	Slitrk6	132.465	1.06768	0.222753	-4.79313	1.64198e-06	6.23786e-05
ENSMUSG00000022096	15460	Hr	1071.24	-0.66578	0.138891	4.79353	1.63874e-06	6.23786e-05
ENSMUSG00000034714	117160	Ttyh2	148.289	-0.85517	0.178647	4.78693	1.69352e-06	6.41723e-05
ENSMUSG00000073599	68545	Ecscr	378.611	-0.765428	0.159952	4.78536	1.70679e-06	6.45106e-05
ENSMUSG00000022868	11625	Ahsg	1384.27	-1.32158	0.276533	4.7791	1.76083e-06	6.63841e-05
ENSMUSG00000079355	252837	Ccrl1	129.276	-0.929171	0.194488	4.77753	1.7746e-06	6.67341e-05
ENSMUSG00000042359	99031	Osbpl6	1159.39	0.616505	0.129072	-4.77642	1.7844e-06	6.69332e-05
ENSMUSG00000032184	70082	Lysmd2	392.617	-0.650846	0.136492	4.76839	1.857e-06	6.94808e-05
ENSMUSG00000002233	11853	Rhoc	915.602	-0.733341	0.153863	4.76619	1.8774e-06	7.00676e-05
ENSMUSG00000026833	56177	Olfm1	1708.11	0.461857	0.0969534	-4.7637	1.90077e-06	7.07619e-05
ENSMUSG00000028426	19359	Rad23b	2528.08	-0.454156	0.0954329	4.7589	1.94647e-06	7.22823e-05
ENSMUSG00000021109	15251	Hif1a	2270.16	-0.565004	0.119054	4.74579	2.07694e-06	7.69347e-05
ENSMUSG00000020435	74309	Osbp2	1409.17	0.655977	0.138274	-4.74405	2.09487e-06	7.7406e-05
ENSMUSG00000021759	19012	Ppap2a	809.186	-0.54745	0.115635	4.7343	2.19815e-06	8.06204e-05
ENSMUSG00000000142	12006	Axin2	364.763	0.844461	0.178434	-4.73262	2.2164e-06	8.08903e-05
ENSMUSG00000031996	11804	Aplp2	9777.23	-0.521639	0.110221	4.73264	2.21613e-06	8.08903e-05
ENSMUSG00000037253	240396	Mex3c	827.543	-0.595396	0.126178	4.7187	2.37361e-06	8.64155e-05
ENSMUSG00000039529	54670	Atp8b1	557.467	-0.712753	0.151259	4.71214	2.45123e-06	8.90234e-05
ENSMUSG00000004791	18654	Pgf	163.593	-0.919676	0.195346	4.70793	2.50246e-06	9.05464e-05
ENSMUSG00000021913	239017	Ogdhl	334.878	-0.89275	0.189636	4.70769	2.50536e-06	9.05464e-05
ENSMUSG00000025892	14802	Gria4	14.6496	-1.33947	0.284813	4.70298	2.56394e-06	9.24389e-05
ENSMUSG00000031714	14388	Gab1	2393.9	0.503367	0.107265	-4.69274	2.6957e-06	9.69539e-05
ENSMUSG00000039852	68703	Rere	1711.09	0.620686	0.132423	-4.68714	2.77055e-06	9.94051e-05
ENSMUSG00000016494	12490	Cd34	5588.25	-0.579766	0.123769	4.68425	2.80991e-06	0.000100575
ENSMUSG00000024411	11829	Aqp4	323.206	0.717302	0.153244	-4.68077	2.85798e-06	0.000101804
ENSMUSG00000004951	15507	Hspb1	1198.68	-0.981723	0.209725	4.681	2.85482e-06	0.000101804
ENSMUSG00000021638	18260	Ocln	114.301	-0.881918	0.188536	4.67772	2.90088e-06	0.000103085
ENSMUSG00000022136	100037258	Dnajc3	3078.67	-0.645126	0.137999	4.67486	2.94158e-06	0.000104282
ENSMUSG00000031298	237175	Gpr64	114.819	-0.88708	0.189882	4.67173	2.98674e-06	0.000105631
ENSMUSG00000001918	20514	Slc1a5	838.678	-0.741043	0.15864	4.67121	2.9943e-06	0.000105647
ENSMUSG00000021678	14063	F2rl1	30.3536	-1.26943	0.271922	4.66836	3.03608e-06	0.000106867
ENSMUSG00000057738	20740	Spna2	17860.9	-0.537537	0.115227	4.66503	3.08567e-06	0.000108356
ENSMUSG00000031422	56397	Morf4l2	1448.1	-0.496655	0.106498	4.66352	3.10849e-06	0.0001089
ENSMUSG00000053931	71994	Cnn3	702.145	-0.688156	0.147866	4.65391	3.25698e-06	0.000113833
ENSMUSG00000026727	20163	Rsu1	711.437	-0.540736	0.116236	4.65205	3.2865e-06	0.000114596
ENSMUSG00000053334	231630	Ficd	356.191	0.629798	0.135612	-4.64413	3.41511e-06	0.000118254
ENSMUSG00000044393	13511	Dsg2	3484.38	0.620692	0.133651	-4.64412	3.4153e-06	0.000118254
ENSMUSG00000020075	56200	Ddx21	1328.01	-0.520223	0.112013	4.64431	3.41223e-06	0.000118254
ENSMUSG00000033777	279572	Tlr13	129.928	-0.86523	0.186974	4.62754	3.70041e-06	0.000127828
ENSMUSG00000050503	74165	Fbxl22	1115.06	-0.872379	0.188566	4.62637	3.72122e-06	0.000128248
ENSMUSG00000005397	18073	Nid1	7700.4	-0.81139	0.175462	4.6243	3.75858e-06	0.000129236
ENSMUSG00000046280	214547	She	772.603	-0.663142	0.143433	4.62335	3.77586e-06	0.00012953
ENSMUSG00000053411	52609	Cbx7	623.565	0.58848	0.127422	-4.61836	3.8678e-06	0.000131942
ENSMUSG00000036902	74513	Neto2	177.421	-0.893543	0.193459	4.61877	3.86018e-06	0.000131942
ENSMUSG00000045659	233765	Plekha7	1397.71	0.561252	0.121533	-4.61809	3.87281e-06	0.000131942
ENSMUSG00000025404	71750	R3hdm2	1865.09	0.653732	0.141606	-4.61655	3.90179e-06	0.000132625
ENSMUSG00000036528	19024	Ppfibp2	1129.98	0.479501	0.103935	-4.61347	3.96005e-06	0.000133992
ENSMUSG00000020599	19739	Rgs9	41.3707	1.08836	0.23602	-4.61131	4.00144e-06	0.000135085
ENSMUSG00000001029	15896	Icam2	469.645	-0.787497	0.170876	4.6086	4.05388e-06	0.000136545
ENSMUSG00000036006	193385	Fam65b	144.747	-0.834317	0.181112	4.60663	4.09251e-06	0.000137534
ENSMUSG00000032232	68178	Cgnl1	6798.01	-0.698491	0.151724	4.60371	4.15035e-06	0.000139163
ENSMUSG00000022803	64082	Popdc2	6753.45	-0.555804	0.12076	4.60254	4.1736e-06	0.000139628
ENSMUSG00000057719	269016	Sh3rf2	383.872	0.830479	0.180506	-4.60085	4.20774e-06	0.000140453
ENSMUSG00000030757	210162	Zkscan2	89.7302	1.04251	0.226722	-4.59817	4.26225e-06	0.000141954
ENSMUSG00000003541	15937	Ier3	546.868	0.69878	0.151995	-4.59739	4.27812e-06	0.000142164
ENSMUSG00000020032	77976	Nuak1	1581.65	-0.650314	0.141624	4.59184	4.39364e-06	0.000145677
ENSMUSG00000027200	214968	Sema6d	2659.71	-0.469043	0.102313	4.58437	4.55353e-06	0.000150642
ENSMUSG00000039759	69876	Thap3	198.959	0.696436	0.152074	-4.57958	4.65903e-06	0.000153789
ENSMUSG00000037868	13654	Egr2	58.1467	-1.28454	0.280875	4.57336	4.79972e-06	0.000158082
ENSMUSG00000079012	20717	Serpina3m	55.908	1.17187	0.256569	-4.56746	4.9367e-06	0.000162234
ENSMUSG00000019873	28193	Reep3	1079.73	-0.65987	0.144567	4.56445	5.00815e-06	0.000164219
ENSMUSG00000029064	14688	Gnb1	2931.8	-0.451064	0.099005	4.55597	5.21442e-06	0.000170606
ENSMUSG00000031906	58994	Smpd3	586.754	-0.866337	0.190198	4.55492	5.24045e-06	0.00017108
ENSMUSG00000044172	68509	Ptx4	35.3831	-1.14887	0.25239	4.55196	5.3148e-06	0.000173127
ENSMUSG00000050222	239114	Il17d	68.8479	-0.987533	0.217039	4.55003	5.36389e-06	0.000174344
ENSMUSG00000039556	54646	Ppp1r3f	94.9176	0.883159	0.194248	-4.54655	5.4532e-06	0.00017686
ENSMUSG00000039087	68750	Rreb1	1394.07	0.621449	0.136782	-4.54335	5.53671e-06	0.000179177
ENSMUSG00000001891	216558	Ugp2	5180.31	-0.5706	0.125762	4.53715	5.70184e-06	0.000183757
ENSMUSG00000037405	15894	Icam1	755.539	-0.745959	0.164429	4.53666	5.71534e-06	0.000183757
ENSMUSG00000031453	19414	Rasa3	1519.24	-0.510859	0.112606	4.53668	5.7146e-06	0.000183757
ENSMUSG00000031755	67378	Bbs2	448.352	0.553559	0.122105	-4.53346	5.80242e-06	0.000185961
ENSMUSG00000028152	56224	Tspan5	409.563	-0.704767	0.155505	4.53213	5.8392e-06	0.000186528
ENSMUSG00000001700	107022	Gramd3	552.19	-0.553738	0.12237	4.52512	6.03623e-06	0.000191996
ENSMUSG00000074785	54712	Plxnc1	930.145	-0.577148	0.127565	4.52434	6.05844e-06	0.000192291
ENSMUSG00000026679	71233	Enkur	142.923	-0.832724	0.184111	4.52295	6.09826e-06	0.000193142
ENSMUSG00000034462	18764	Pkd2	1410.97	-0.547832	0.121591	4.50551	6.62123e-06	0.000209259
ENSMUSG00000062609	16516	Kcnj15	40.4839	-1.18107	0.262191	4.50462	6.64927e-06	0.000209699
ENSMUSG00000021047	664883	Nova1	224.823	0.707006	0.157096	-4.50047	6.78018e-06	0.000213375
ENSMUSG00000024011	74116	Pi16	3168.64	-0.605289	0.134558	4.49837	6.84777e-06	0.000215046
ENSMUSG00000038776	13849	Ephx1	1643.75	-0.64707	0.14393	4.49573	6.93313e-06	0.00021681
ENSMUSG00000032334	16949	Loxl1	1891.89	-0.746961	0.166389	4.48924	7.14791e-06	0.000222589
ENSMUSG00000022324	17181	Matn2	1649.31	-0.640821	0.142801	4.48751	7.2061e-06	0.000223932
ENSMUSG00000028567	66073	Txndc12	721.763	-0.608623	0.13566	4.48638	7.24448e-06	0.000224432
ENSMUSG00000032186	50876	Tmod2	782.677	-0.59922	0.133571	4.48614	7.25242e-06	0.000224432
ENSMUSG00000031207	17698	Msn	3706.47	-0.500424	0.111631	4.48285	7.36536e-06	0.000227453
ENSMUSG00000025355	58223	Mmp19	193.86	-0.830756	0.185496	4.47858	7.51423e-06	0.000231569
ENSMUSG00000059408	80978	Mrgprh	142.506	0.73038	0.163159	-4.47648	7.5882e-06	0.000233365
ENSMUSG00000028989	654812	Angptl7	128.94	-1.03047	0.23031	4.47428	7.66704e-06	0.000235302
ENSMUSG00000022443	17886	Myh9	7115.56	-0.613592	0.137328	4.46808	7.8923e-06	0.000241716
ENSMUSG00000022199	59049	Slc22a17	189.925	0.698833	0.156437	-4.46719	7.92554e-06	0.000242234
ENSMUSG00000046598	71911	Bdh1	939.469	0.743584	0.166489	-4.46626	7.95989e-06	0.000242785
ENSMUSG00000000001	14679	Gnai3	1137.89	-0.535575	0.119956	4.46475	8.0163e-06	0.000244004
ENSMUSG00000023826	50873	Park2	217.85	0.676538	0.151557	-4.46393	8.04703e-06	0.000244439
ENSMUSG00000005103	22388	Wdr1	2765.37	-0.473542	0.106177	4.45994	8.19829e-06	0.000248525
ENSMUSG00000029163	100952	Emilin1	886.838	-0.769976	0.172675	4.4591	8.23028e-06	0.000248987
ENSMUSG00000045092	13609	S1pr1	2812.87	-0.805243	0.180613	4.45839	8.25765e-06	0.000249307
ENSMUSG00000037242	29876	Clic4	12278.6	-0.464376	0.10436	4.44975	8.5969e-06	0.000259023
ENSMUSG00000029484	11745	Anxa3	929.704	-0.88688	0.199407	4.44759	8.68377e-06	0.000261111
ENSMUSG00000038267	73102	Slc22a23	650.992	0.646388	0.145411	-4.44525	8.77903e-06	0.000263442
ENSMUSG00000049551	14371	Fzd9	36.1538	1.09857	0.247243	-4.44328	8.85967e-06	0.000265326
ENSMUSG00000022951	54720	Rcan1	1405.2	-0.70278	0.158196	4.44247	8.89336e-06	0.000265799
ENSMUSG00000055723	66922	Rras2	1207.11	-0.618975	0.139354	4.44176	8.92263e-06	0.000266138
ENSMUSG00000020154	19263	Ptprb	6362.14	-0.717082	0.161604	4.43728	9.11038e-06	0.000271193
ENSMUSG00000039496	227526	Cdnf	618.606	0.571039	0.128741	-4.43558	9.18253e-06	0.000272794
ENSMUSG00000046574	233210	Prr12	477.68	0.795071	0.179294	-4.43445	9.23081e-06	0.000273443
ENSMUSG00000054580	18779	Pla2r1	549.114	0.54148	0.122114	-4.43421	9.24118e-06	0.000273443
ENSMUSG00000053963	381310	6330403A02Rik	233.244	0.765427	0.172724	-4.4315	9.35819e-06	0.000275807
ENSMUSG00000032202	11891	Rab27a	243.976	-0.726775	0.16403	4.43074	9.39098e-06	0.000276225
ENSMUSG00000028776	94242	Tinagl1	1449.84	-1.20432	0.271871	4.42976	9.43377e-06	0.000276935
ENSMUSG00000042744	269700	Gm15800	3099.8	0.572584	0.129276	-4.42914	9.4608e-06	0.000277181
ENSMUSG00000015850	229595	Adamtsl4	2711.21	0.719298	0.162643	-4.42256	9.75402e-06	0.000285209
ENSMUSG00000035357	55983	Pdzrn3	3641.89	-0.537072	0.121492	4.42065	9.84059e-06	0.000287175
ENSMUSG00000038128	12326	Camk4	66.0393	-0.987781	0.223513	4.41934	9.90028e-06	0.000288351
ENSMUSG00000021555	78689	Naa35	1313.08	0.504345	0.114345	-4.41075	1.03013e-05	0.000298566
ENSMUSG00000090841	17904	Myl6	450.323	-0.8308	0.188367	4.41054	1.03113e-05	0.000298566
ENSMUSG00000030770	57342	Parva	2037.36	-0.531364	0.12046	4.41112	1.02839e-05	0.000298566
ENSMUSG00000027931	18160	Npr1	1450.12	-0.492527	0.111705	4.40917	1.03767e-05	0.000299874
ENSMUSG00000041261	12319	Car8	615.942	-0.787587	0.178666	4.40814	1.04262e-05	0.000300721
ENSMUSG00000048065	320635	Cyb5r2	207.913	0.741508	0.168374	-4.40394	1.06305e-05	0.000305426
ENSMUSG00000023055	67488	Calcoco1	1955.33	0.559364	0.127033	-4.4033	1.06616e-05	0.000305729
ENSMUSG00000045761	320159	Fam179a	245.748	0.867505	0.197094	-4.40147	1.0752e-05	0.000307136
ENSMUSG00000030513	18553	Pcsk6	2113.34	-0.526817	0.119689	4.40154	1.07486e-05	0.000307136
ENSMUSG00000019814	353258	Ltv1	411.649	-0.571713	0.129915	4.40067	1.07916e-05	0.000307477
ENSMUSG00000022184	106052	Fbxo4	322.28	-0.620216	0.140946	4.4004	1.08054e-05	0.000307477
ENSMUSG00000042286	192187	Stab1	6843.94	-0.561585	0.127676	4.39853	1.08985e-05	0.000309534
ENSMUSG00000040990	58194	Sh3kbp1	1483.83	-0.641653	0.146002	4.39483	1.10858e-05	0.000313057
ENSMUSG00000008475	67771	Arpc5	650.32	-0.621681	0.141448	4.39513	1.10709e-05	0.000313057
ENSMUSG00000032988	57274	Slc16a8	55.9996	1.03629	0.236263	-4.38618	1.15361e-05	0.000323315
ENSMUSG00000024935	20510	Slc1a1	86.2976	-1.03519	0.236003	4.38637	1.1526e-05	0.000323315
ENSMUSG00000034868	67938	Myl12b	1350.89	-0.534085	0.121863	4.38267	1.17233e-05	0.000327943
ENSMUSG00000036446	17022	Lum	4565.46	-0.765818	0.17478	4.38162	1.17801e-05	0.000328296
ENSMUSG00000003617	12870	Cp	5898.31	-0.608071	0.138767	4.38197	1.17612e-05	0.000328296
ENSMUSG00000015843	20183	Rxrg	750.121	0.499662	0.114119	-4.37841	1.19548e-05	0.00033254
ENSMUSG00000021025	18035	Nfkbia	1167.72	-0.910278	0.20808	4.37465	1.21627e-05	0.000337692
ENSMUSG00000021750	268709	Fam107a	366.846	-1.20856	0.276384	4.37275	1.22694e-05	0.000340017
ENSMUSG00000006699	12540	Cdc42	4051.56	-0.506209	0.11582	4.37064	1.23885e-05	0.00034268
ENSMUSG00000037656	20516	Slc20a2	7300.24	0.426366	0.0976422	-4.36662	1.26186e-05	0.000348396
ENSMUSG00000030213	54343	Atf7ip	2012.7	0.458405	0.105088	-4.3621	1.28819e-05	0.000355005
ENSMUSG00000034614	216505	Pik3ip1	1393.89	0.667507	0.153233	-4.35615	1.32368e-05	0.00036411
ENSMUSG00000060594	244864	Layn	208.281	-0.707242	0.162442	4.35382	1.33785e-05	0.000367327
ENSMUSG00000026509	12334	Capn2	2966.09	-0.483675	0.111136	4.35209	1.34848e-05	0.000369563
ENSMUSG00000038879	223473	Nipal2	42.143	-1.07556	0.247164	4.35158	1.35159e-05	0.000369732
ENSMUSG00000047250	19224	Ptgs1	1796.9	-0.739261	0.169904	4.35105	1.35488e-05	0.000369951
ENSMUSG00000046223	18793	Plaur	58.1303	-1.12756	0.259275	4.34889	1.36829e-05	0.000372927
ENSMUSG00000042793	329252	Lgr6	1024.3	0.505463	0.116274	-4.34716	1.37915e-05	0.000375198
ENSMUSG00000045312	218454	Lhfpl2	238.58	-0.800297	0.184186	4.34506	1.39239e-05	0.00037811
ENSMUSG00000020484	22433	Xbp1	2436.93	-0.457378	0.105323	4.34263	1.40788e-05	0.000381294
ENSMUSG00000040860	230872	Crocc	180.56	0.8039	0.185144	-4.34201	1.41182e-05	0.000381294
ENSMUSG00000079419	73656	Ms4a6c	182.672	-0.86569	0.199417	4.34111	1.41764e-05	0.00038217
ENSMUSG00000022246	75646	Rai14	253.837	-0.761746	0.175665	4.33635	1.4487e-05	0.000389836
ENSMUSG00000054252	14184	Fgfr3	372.862	-0.819119	0.189133	4.33091	1.48495e-05	0.000398813
ENSMUSG00000001175	12313	Calm1	6168.43	-0.446006	0.102994	4.33041	1.48832e-05	0.000398813
ENSMUSG00000030265	16653	Kras	855.58	-0.553356	0.127793	4.33009	1.49046e-05	0.000398813
ENSMUSG00000000530	11482	Acvrl1	775.493	-0.602058	0.139064	4.32935	1.49548e-05	0.000398813
ENSMUSG00000036438	12313	Calm2	6168.43	-0.446006	0.102994	4.33041	1.48832e-05	0.000398813
ENSMUSG00000073096	243371	Lrrc61	283.567	0.696141	0.160795	-4.32938	1.49533e-05	0.000398813
ENSMUSG00000019370	12313	Calm3	6168.43	-0.446006	0.102994	4.33041	1.48832e-05	0.000398813
ENSMUSG00000041329	11932	Atp1b2	129.649	0.819409	0.189391	-4.32654	1.5147e-05	0.000403213
ENSMUSG00000090231	14962	Cfb	187.034	0.947403	0.219034	-4.32537	1.52274e-05	0.000404629
ENSMUSG00000093620	14962	CT025759.1	187.034	0.947403	0.219034	-4.32537	1.52274e-05	0.000404629
ENSMUSG00000035944	239570	Ttc38	883.293	0.455844	0.10544	-4.32327	1.53735e-05	0.000407782
ENSMUSG00000030091	54563	Nup210	211.101	0.659207	0.152499	-4.32271	1.54125e-05	0.000408087
ENSMUSG00000053199	244867	Arhgap20	1130.56	0.565167	0.13101	-4.31392	1.60383e-05	0.000423902
ENSMUSG00000014776	78688	Nol3	730.585	0.668879	0.155085	-4.31298	1.61072e-05	0.000424967
ENSMUSG00000025935	72265	Tram1	2523.57	-0.53775	0.124746	4.31074	1.62705e-05	0.000428515
ENSMUSG00000040998	114249	Npnt	54.574	-1.08992	0.253108	4.30615	1.66119e-05	0.000436699
ENSMUSG00000040312	240084	Cchcr1	76.8194	0.886708	0.205935	-4.30578	1.66401e-05	0.000436699
ENSMUSG00000020349	19052	Ppp2ca	4672.03	-0.539144	0.125244	4.30476	1.67165e-05	0.000437932
ENSMUSG00000068196	12837	Col8a1	936.219	-0.850987	0.197768	4.30297	1.68527e-05	0.000440721
ENSMUSG00000038007	230379	Acer2	1353.57	-0.847681	0.19703	4.30229	1.69041e-05	0.000441289
ENSMUSG00000021943	14560	Gdf10	59.7135	-1.0864	0.25259	4.30103	1.70004e-05	0.000443023
ENSMUSG00000022856	66664	Tmem41a	228.359	0.649041	0.151067	-4.29637	1.73621e-05	0.000451659
ENSMUSG00000030342	12527	Cd9	1175.19	-0.760951	0.177181	4.29475	1.74887e-05	0.000454155
ENSMUSG00000040260	76441	Daam2	550.049	0.650568	0.151833	-4.28476	1.82933e-05	0.00047422
ENSMUSG00000027074	58207	Slc43a3	2343.51	-0.643537	0.150227	4.28377	1.83755e-05	0.000475521
ENSMUSG00000050587	241568	Lrrc4c	75.3584	0.873821	0.204034	-4.28273	1.84612e-05	0.000476908
ENSMUSG00000033453	235130	Adamts15	1150.19	-0.858485	0.200475	4.28225	1.85014e-05	0.000477115
ENSMUSG00000027533	16592	Fabp5	47.5162	-1.10576	0.258242	4.28186	1.85334e-05	0.000477115
ENSMUSG00000032116	16430	Stt3a	1643.77	-0.479256	0.111954	4.28081	1.86213e-05	0.000478548
ENSMUSG00000058396	11536	Gpr182	290.544	-0.89381	0.208934	4.27796	1.88615e-05	0.000483885
ENSMUSG00000025221	80906	Kcnip2	295.999	-0.789688	0.184725	4.27494	1.91187e-05	0.000489222
ENSMUSG00000039745	53415	Htatip2	377.374	0.700532	0.163891	-4.27437	1.91675e-05	0.000489222
ENSMUSG00000020919	20851	Stat5b	5764.54	0.47484	0.111152	-4.27198	1.93744e-05	0.000493631
ENSMUSG00000030237	28250	Slco1a4	52.7334	-1.05204	0.246486	4.26814	1.97105e-05	0.000501336
ENSMUSG00000050010	330096	Shisa3	25.375	-1.14942	0.269387	4.26678	1.98314e-05	0.000503547
ENSMUSG00000025981	67876	Coq10b	1483.6	-0.709194	0.166332	4.26373	2.01046e-05	0.000509592
ENSMUSG00000037490	353169	Slc2a12	465.251	0.571366	0.134018	-4.26335	2.0138e-05	0.000509592
ENSMUSG00000023022	65970	Lima1	1524.58	-0.482846	0.11331	4.26129	2.03251e-05	0.00051345
ENSMUSG00000028955	22319	Vamp3	634.385	-0.52153	0.122494	4.25759	2.06646e-05	0.000521141
ENSMUSG00000025016	107358	Tm9sf3	5307.37	-0.537439	0.126353	4.25347	2.10486e-05	0.000529925
ENSMUSG00000030659	53322	Nucb2	341.853	-0.6963	0.16377	4.25169	2.12159e-05	0.000533234
ENSMUSG00000034463	219151	Scara3	250.827	-0.587058	0.138232	4.24691	2.16737e-05	0.00054382
ENSMUSG00000068874	20341	Selenbp1	1696.26	0.460132	0.108445	-4.24299	2.20557e-05	0.00055247
ENSMUSG00000028656	12331	Cap1	1476.76	-0.507523	0.119629	4.24247	2.21073e-05	0.00055283
ENSMUSG00000059456	19229	Ptk2b	939.872	0.510833	0.120517	-4.2387	2.24819e-05	0.000561253
ENSMUSG00000037419	71946	Endod1	393.746	-0.537493	0.126885	4.23605	2.2749e-05	0.00056697
ENSMUSG00000028307	230163	Aldob	38.3405	1.10002	0.259799	-4.2341	2.29468e-05	0.000569985
ENSMUSG00000006587	30927	Snai3	34.601	1.13906	0.269015	-4.2342	2.29367e-05	0.000569985
ENSMUSG00000004655	11826	Aqp1	7169.84	-0.657805	0.1554	4.23297	2.30622e-05	0.000571896
ENSMUSG00000040950	216864	Mgl2	218.315	-0.658756	0.15572	4.23037	2.33302e-05	0.000577579
ENSMUSG00000048154	381022	Mll2	3859.63	0.740916	0.175179	-4.22948	2.34235e-05	0.000578923
ENSMUSG00000029659	70717	6330406I15Rik	1606.08	-0.579647	0.137173	4.22567	2.3823e-05	0.000587819
ENSMUSG00000040522	170744	Tlr8	105.778	-0.813835	0.192731	4.22264	2.41458e-05	0.000594796
ENSMUSG00000071540	100504518	3425401B19Rik	1532.55	0.572736	0.135728	-4.21973	2.44591e-05	0.000601516
ENSMUSG00000042626	20416	Shc1	866.734	-0.475239	0.112677	4.21769	2.46814e-05	0.00060598
ENSMUSG00000054808	60595	Actn4	2419.09	-0.743987	0.17644	4.21665	2.4796e-05	0.000607788
ENSMUSG00000074001	72330	Kbtbd5	605.926	0.779027	0.184832	-4.21478	2.50021e-05	0.00061183
ENSMUSG00000022579	68453	Gpihbp1	742.24	-0.729661	0.173166	4.21366	2.51262e-05	0.000613856
ENSMUSG00000062421	11841	Arf2	899.303	-0.493963	0.117278	4.21191	2.53217e-05	0.000617617
ENSMUSG00000029447	12466	Cct6a	1801.74	-0.451524	0.107232	4.21072	2.54558e-05	0.00061987
ENSMUSG00000024901	240518	Peli3	71.5383	0.898455	0.213528	-4.20767	2.58013e-05	0.00062623
ENSMUSG00000057561	13664	Eif1a	541.703	-0.589721	0.140146	4.20791	2.57739e-05	0.00062623
ENSMUSG00000045441	243385	Gprin3	202.027	0.956746	0.22747	-4.20604	2.59885e-05	0.000629743
ENSMUSG00000023828	20519	Slc22a3	459.1	0.551289	0.131098	-4.20516	2.609e-05	0.000631175
ENSMUSG00000043019	66967	Edem3	2129.03	-0.465474	0.110773	4.20204	2.64526e-05	0.000638906
ENSMUSG00000033590	208943	Myo5c	84.3946	0.844424	0.201172	-4.19752	2.69851e-05	0.000649653
ENSMUSG00000041912	72634	Tdrkh	143.695	0.744582	0.177437	-4.19632	2.7129e-05	0.000652061
ENSMUSG00000031808	26457	Slc27a1	3476.15	0.596211	0.142166	-4.19376	2.74374e-05	0.000656351
ENSMUSG00000034771	21886	Tle2	190.19	0.713173	0.17004	-4.19414	2.7391e-05	0.000656351
ENSMUSG00000031502	12826	Col4a1	12169	-0.711398	0.169634	4.19373	2.744e-05	0.000656351
ENSMUSG00000048217	217214	Nags	19.04	1.15325	0.275044	-4.19297	2.75329e-05	0.000657513
ENSMUSG00000078307	330941	AI593442	23.4345	1.18045	0.282103	-4.18447	2.85833e-05	0.000681504
ENSMUSG00000027238	228564	Frmd5	2767.86	-0.807934	0.193119	4.1836	2.86925e-05	0.000683011
ENSMUSG00000031375	12111	Bgn	4272.69	-0.620645	0.148382	4.18275	2.88007e-05	0.000684488
ENSMUSG00000027204	14118	Fbn1	5107.96	-0.756809	0.18099	4.18151	2.89582e-05	0.000687134
ENSMUSG00000035530	20918	Eif1	822.022	0.742663	0.177629	-4.18098	2.90254e-05	0.00068763
ENSMUSG00000058355	24015	Abce1	2163.03	-0.498011	0.119156	4.1795	2.92156e-05	0.000691033
ENSMUSG00000030793	66824	Pycard	324.087	0.744446	0.17816	-4.17853	2.93405e-05	0.000692884
ENSMUSG00000020057	71712	Dram1	231.627	-0.67121	0.160658	4.17788	2.94239e-05	0.000693015
ENSMUSG00000026181	68606	Ppm1f	1581.8	-0.571796	0.136867	4.17776	2.94394e-05	0.000693015
ENSMUSG00000029840	14489	Mtpn	1793.95	-0.593155	0.142022	4.17651	2.96017e-05	0.000695734
ENSMUSG00000025314	19271	Ptprj	566.071	-0.513202	0.123131	4.16795	3.07358e-05	0.000721247
ENSMUSG00000040435	17872	Ppp1r15a	1033.47	-0.729768	0.175134	4.1669	3.08767e-05	0.00072341
ENSMUSG00000031232	67075	Magt1	1642.47	-0.459778	0.110643	4.15553	3.2454e-05	0.000757973
ENSMUSG00000060591	80876	Ifitm2	984.336	-0.687781	0.165506	4.15561	3.24416e-05	0.000757973
ENSMUSG00000003161	109552	Sri	754.728	-0.522445	0.125829	4.15201	3.29567e-05	0.000767302
ENSMUSG00000036867	17130	Smad6	686.2	-0.808009	0.194649	4.1511	3.30881e-05	0.000769157
ENSMUSG00000015605	20807	Srf	2847.19	-0.622282	0.149966	4.14949	3.33219e-05	0.00077338
ENSMUSG00000061315	17938	Naca	2507.65	0.749443	0.180657	-4.14842	3.34771e-05	0.000774562
ENSMUSG00000026639	16780	Lamb3	1629.38	0.516158	0.124421	-4.14848	3.34688e-05	0.000774562
ENSMUSG00000030137	53857	Tuba8	1894.96	-0.751756	0.181236	4.14793	3.35488e-05	0.000775014
ENSMUSG00000030207	74525	8430419L09Rik	236.516	0.649447	0.156693	-4.1447	3.40255e-05	0.000783589
ENSMUSG00000044583	170743	Tlr7	171.396	-0.842427	0.203248	4.14482	3.40084e-05	0.000783589
ENSMUSG00000052676	215693	Zmat1	185.229	0.74758	0.180406	-4.14388	3.41481e-05	0.000785195
ENSMUSG00000027993	80890	Trim2	384.856	-0.534931	0.129182	4.14091	3.45937e-05	0.000794212
ENSMUSG00000020773	217333	Trim47	1124.46	-0.676079	0.163347	4.13891	3.48957e-05	0.000799908
ENSMUSG00000025810	18186	Nrp1	5775.45	-0.518842	0.125513	4.13377	3.56853e-05	0.000816748
ENSMUSG00000003273	12348	Car11	162.099	0.652845	0.157975	-4.13258	3.58711e-05	0.000819737
ENSMUSG00000030930	77590	Chst15	388.529	-0.67801	0.16413	4.13093	3.61298e-05	0.000824381
ENSMUSG00000016918	240725	Sulf1	3656.22	-0.601578	0.145692	4.12911	3.64164e-05	0.000829646
ENSMUSG00000028978	18127	Nos3	1906.89	-0.718795	0.174272	4.12455	3.71456e-05	0.000844963
ENSMUSG00000020135	23805	Apc2	581.259	0.826054	0.200325	-4.12356	3.73061e-05	0.000847317
ENSMUSG00000047821	94092	Trim16	197.171	-0.672122	0.163081	4.12139	3.76595e-05	0.000854038
ENSMUSG00000006281	21745	Tep1	1084.1	0.449012	0.109038	-4.11796	3.82249e-05	0.000865538
ENSMUSG00000060671	54667	Atp8b2	1331.75	-0.492225	0.119607	4.11536	3.86581e-05	0.000874015
ENSMUSG00000049791	14366	Fzd4	1431.98	-0.648995	0.15774	4.11434	3.88283e-05	0.000876528
ENSMUSG00000024909	58859	Efemp2	286.076	-0.624595	0.151981	4.10969	3.96194e-05	0.000893029
ENSMUSG00000037855	216049	Zfp365	55.7154	-0.980715	0.238804	4.10678	4.01218e-05	0.000902984
ENSMUSG00000042734	69480	Ttc9	120.536	-0.986032	0.24017	4.10556	4.0333e-05	0.000906364
ENSMUSG00000024743	54525	Syt7	1276.61	0.54431	0.132591	-4.10518	4.03998e-05	0.000906492
ENSMUSG00000023927	20230	Satb1	604.769	0.603379	0.147006	-4.10446	4.0526e-05	0.000906586
ENSMUSG00000040327	78309	Cul9	1331.92	0.541975	0.132038	-4.10468	4.04874e-05	0.000906586
ENSMUSG00000042354	30877	Gnl3	524.138	-0.594907	0.14496	4.10394	4.06181e-05	0.000907281
ENSMUSG00000037139	242702	Myom3	138.382	0.678376	0.165317	-4.10348	4.06986e-05	0.000907713
ENSMUSG00000021477	13039	Ctsl	5624.01	-0.391437	0.0954757	4.09986	4.13407e-05	0.000917899
ENSMUSG00000057329	12043	Bcl2	408.011	-0.536802	0.131018	4.09717	4.1824e-05	0.000924484
ENSMUSG00000057606	382864	Colq	22.7685	-1.14318	0.279006	4.09735	4.17914e-05	0.000924484
ENSMUSG00000022146	18414	Osmr	1439.37	-0.684515	0.167107	4.09628	4.19845e-05	0.000926653
ENSMUSG00000054958	230718	Nt5c1a	537.726	0.573831	0.14013	-4.095	4.22169e-05	0.000930401
ENSMUSG00000034487	68304	Kdelc2	808.279	-0.507913	0.124107	4.09254	4.26676e-05	0.000937551
ENSMUSG00000034687	231470	Fras1	3056.82	0.49552	0.12109	-4.09218	4.27342e-05	0.000937627
ENSMUSG00000030731	20981	Syt3	76.3911	0.852631	0.208441	-4.09051	4.30423e-05	0.000942374
ENSMUSG00000052496	18766	Pkdrej	263.114	0.576471	0.14096	-4.08962	4.32081e-05	0.00094255
ENSMUSG00000028690	67096	Mmachc	795.791	-0.475051	0.116161	4.0896	4.32123e-05	0.00094255
ENSMUSG00000034472	75141	Rasd2	62.8178	0.897169	0.219503	-4.08728	4.36455e-05	0.00094921
ENSMUSG00000024759	109168	Atl3	1796.82	-0.535064	0.1309	4.08756	4.35932e-05	0.00094921
ENSMUSG00000039376	68760	Synpo2l	4083.15	-0.591645	0.144803	4.08586	4.39141e-05	0.000953655
ENSMUSG00000021036	20773	Sptlc2	771.424	-0.565523	0.138578	4.0809	4.48615e-05	0.000972807
ENSMUSG00000051790	216856	Nlgn2	317.616	0.673259	0.165	-4.08036	4.4966e-05	0.000973653
ENSMUSG00000001435	12822	Col18a1	915.205	-0.64985	0.159303	4.07934	4.5163e-05	0.000976493
ENSMUSG00000037060	109042	Prkcdbp	553.484	-0.530765	0.130216	4.07604	4.58099e-05	0.000989041
ENSMUSG00000034401	67946	Spata6	295.823	-0.620278	0.152278	4.07331	4.63495e-05	0.000998028
ENSMUSG00000032932	110920	Hspa13	944.989	-0.470332	0.115468	4.07326	4.63605e-05	0.000998028
ENSMUSG00000039763	246738	Dnajc28	1062.82	0.476165	0.116964	-4.07105	4.68024e-05	0.00100318
ENSMUSG00000017774	17913	Myo1c	4984.49	-0.549002	0.13485	4.0712	4.67722e-05	0.00100318
ENSMUSG00000042485	66175	Mustn1	149.053	-0.7421	0.182259	4.07168	4.66755e-05	0.00100318
ENSMUSG00000022867	30940	Usp25	4566.98	-0.427552	0.105067	4.06933	4.71476e-05	0.00100767
ENSMUSG00000045657	93881	Pcdhb10	20.6043	-1.13086	0.277887	4.0695	4.71145e-05	0.00100767
ENSMUSG00000028909	19273	Ptpru	507.067	0.561223	0.138024	-4.06612	4.78022e-05	0.00102019
ENSMUSG00000052512	78286	Nav2	2082.11	0.525237	0.129259	-4.06346	4.83509e-05	0.00102895
ENSMUSG00000022987	239652	Zfp641	347.782	0.54131	0.133291	-4.06113	4.88362e-05	0.00103779
ENSMUSG00000028132	99887	Tmem56	128.106	0.78089	0.19242	-4.05825	4.94414e-05	0.00104915
ENSMUSG00000030711	20887	Sult1a1	1119.72	-0.765226	0.188697	4.05531	5.0068e-05	0.00106093
ENSMUSG00000025903	18777	Lypla1	1374.92	-0.442334	0.10912	4.05364	5.04267e-05	0.00106701
ENSMUSG00000040322	229731	Slc25a24	377.137	-0.572028	0.141249	4.04979	5.12634e-05	0.00108312
ENSMUSG00000038670	233199	Mybpc2	348.719	-0.583394	0.14418	4.04629	5.20349e-05	0.00109635
ENSMUSG00000044072	237711	Eml6	535.587	0.469249	0.116003	-4.04516	5.22878e-05	0.00110012
ENSMUSG00000044147	11845	Arf6	1163.7	-0.538506	0.133141	4.04461	5.24095e-05	0.00110112
ENSMUSG00000039116	215798	Gpr126	534.339	-0.57036	0.141057	4.04346	5.26671e-05	0.00110497
ENSMUSG00000023036	93716	Pcdhga9	189.814	0.726025	0.179601	-4.04244	5.28984e-05	0.00110825
ENSMUSG00000032575	74840	Manf	888.811	-0.500322	0.123793	4.04159	5.30892e-05	0.00110912
ENSMUSG00000021365	18003	Nedd9	748.894	-0.85358	0.211188	4.0418	5.30434e-05	0.00110912
ENSMUSG00000006782	12799	Cnp	440.063	0.528032	0.130711	-4.03968	5.35233e-05	0.00111506
ENSMUSG00000028933	57434	Xrcc2	234.76	0.629317	0.155777	-4.03986	5.34829e-05	0.00111506
ENSMUSG00000003131	18475	Pafah1b2	1369.42	-0.474491	0.117493	4.03846	5.38028e-05	0.00111865
ENSMUSG00000052566	170833	Hook2	106.259	0.794281	0.196688	-4.03827	5.38466e-05	0.00111865
ENSMUSG00000033032	106877	Afap1l1	3434.94	-0.385303	0.0954234	4.03782	5.39503e-05	0.00111924
ENSMUSG00000025656	236915	Arhgef9	566.664	0.484062	0.119982	-4.03447	5.47266e-05	0.00113376
ENSMUSG00000070733	72313	Fryl	3908.92	0.429303	0.106434	-4.03354	5.4944e-05	0.00113668
ENSMUSG00000026064	19243	Ptp4a1	264.546	-0.815702	0.202379	4.03057	5.56412e-05	0.00114951
ENSMUSG00000055980	16367	Irs1	2301.08	-0.476945	0.118368	4.02935	5.5932e-05	0.00115391
ENSMUSG00000031838	65972	Ifi30	280.3	-0.605637	0.150347	4.02827	5.61889e-05	0.0011576
ENSMUSG00000042613	229534	Pbxip1	7812.13	0.444608	0.110409	-4.0269	5.65168e-05	0.00116274
ENSMUSG00000021094	66375	Dhrs7	1316.67	0.537033	0.133375	-4.02649	5.66147e-05	0.00116315
ENSMUSG00000024529	16948	Lox	242.771	-0.852786	0.2119	4.02447	5.71029e-05	0.00117046
ENSMUSG00000024772	13660	Ehd1	1482.14	-0.598747	0.14878	4.02437	5.71283e-05	0.00117046
ENSMUSG00000020077	19073	Srgn	324.613	-0.629214	0.156397	4.02319	5.74163e-05	0.00117474
ENSMUSG00000023153	69671	Tmem52	55.2168	-1.11634	0.277523	4.02251	5.75818e-05	0.00117651
ENSMUSG00000027852	18176	Nras	1196.71	-0.44134	0.10973	4.02205	5.76931e-05	0.00117716
ENSMUSG00000053877	100043597	Srcap	3009.86	0.543897	0.135276	-4.02065	5.80389e-05	0.00118259
ENSMUSG00000027940	59069	Tpm3	469.997	-0.582145	0.144815	4.01994	5.82141e-05	0.00118454
ENSMUSG00000043621	212190	Ubxn10	67.6899	0.871116	0.216787	-4.01831	5.86177e-05	0.00119112
ENSMUSG00000031811	76454	Fbxo31	2127.27	0.57874	0.14411	-4.01596	5.92047e-05	0.0012014
ENSMUSG00000054453	236643	Sytl5	44.8625	-1.0665	0.266013	4.00921	6.09219e-05	0.00123456
ENSMUSG00000031007	70495	Atp6ap2	847.555	-0.514243	0.128315	4.00767	6.13211e-05	0.00123931
ENSMUSG00000001864	108897	Aif1l	469.941	-0.648649	0.161852	4.00766	6.1323e-05	0.00123931
ENSMUSG00000029648	14254	Flt1	3596.68	-0.532724	0.133002	4.00538	6.19182e-05	0.00124794
ENSMUSG00000036523	268527	Greb1	40.2827	1.03977	0.259581	-4.00556	6.18703e-05	0.00124794
ENSMUSG00000020823	74136	Sec14l1	3083.67	-0.498382	0.124525	4.00226	6.27402e-05	0.00126279
ENSMUSG00000050705	69662	2310061I04Rik	316.952	0.563875	0.141061	-3.9974	6.40433e-05	0.00128554
ENSMUSG00000035765	69190	Dym	1659.85	0.413136	0.103388	-3.99597	6.44294e-05	0.00129154
ENSMUSG00000028943	56226	Espn	133.983	0.827743	0.207173	-3.99542	6.45796e-05	0.00129281
ENSMUSG00000045838	214239	A430105I19Rik	1757.32	0.489171	0.122463	-3.99445	6.48449e-05	0.00129637
ENSMUSG00000020357	14257	Flt4	724.364	-0.618318	0.154864	3.99267	6.53345e-05	0.00130441
ENSMUSG00000053693	56527	Mast1	41.321	0.966701	0.242163	-3.99194	6.55363e-05	0.00130668
ENSMUSG00000021493	67399	Pdlim7	858.688	-0.650275	0.162933	3.99106	6.57783e-05	0.00130853
ENSMUSG00000020524	14799	Gria1	42.3029	-1.01196	0.253563	3.99096	6.58055e-05	0.00130853
ENSMUSG00000035900	223752	Gramd4	1030.62	0.571915	0.143408	-3.98803	6.66248e-05	0.00132306
ENSMUSG00000021583	80898	Erap1	1490.33	-0.47203	0.118394	3.98694	6.69304e-05	0.00132585
ENSMUSG00000024867	18719	Pip5k1b	1234.8	-0.426847	0.107071	3.98658	6.70336e-05	0.00132585
ENSMUSG00000003518	72349	Dusp3	3875.47	-0.413905	0.103907	3.98343	6.79285e-05	0.00134177
ENSMUSG00000031246	56726	Sh3bgrl	1399.04	-0.711577	0.178655	3.98296	6.80613e-05	0.00134261
ENSMUSG00000022261	15529	Sdc2	1650.9	-0.498428	0.125163	3.98222	6.82755e-05	0.00134505
ENSMUSG00000020721	78455	Helz	1225.08	0.473312	0.119017	-3.97685	6.98332e-05	0.00137223
ENSMUSG00000005268	19116	Prlr	332.936	0.753908	0.189575	-3.97683	6.98403e-05	0.00137223
ENSMUSG00000013275	98396	Slc41a1	2737.49	0.425575	0.107042	-3.97579	7.01452e-05	0.00137506
ENSMUSG00000038486	64051	Sv2a	520.504	0.520987	0.131042	-3.97571	7.01694e-05	0.00137506
ENSMUSG00000021796	12166	Bmpr1a	4586.87	-0.476391	0.120212	3.96292	7.40381e-05	0.00144896
ENSMUSG00000053226	23863	Dand5	128.284	0.73391	0.185272	-3.96127	7.45529e-05	0.00145688
ENSMUSG00000071669	74478	Snx29	361.715	0.575506	0.145293	-3.96099	7.46388e-05	0.00145688
ENSMUSG00000032997	74241	Chpf	766.035	-0.615728	0.155654	3.95575	7.62942e-05	0.00148724
ENSMUSG00000040441	216441	Slc26a10	260.59	0.797086	0.201546	-3.95487	7.65775e-05	0.0014908
ENSMUSG00000074793	72630	Hspa12b	626.739	-0.596718	0.15107	3.94993	7.81733e-05	0.00151988
ENSMUSG00000001027	110880	Scn4a	1232.73	0.540167	0.136781	-3.94914	7.84324e-05	0.00152093
ENSMUSG00000073557	329251	Ppp1r12b	3904.57	0.37438	0.094793	-3.94945	7.83314e-05	0.00152093
ENSMUSG00000035024	78658	Ncapd3	974.722	0.408567	0.103484	-3.94811	7.87722e-05	0.00152354
ENSMUSG00000021221	70127	Dpf3	339.382	0.539439	0.136625	-3.94831	7.87037e-05	0.00152354
ENSMUSG00000015961	11566	Adss	402.598	-0.631831	0.160115	3.9461	7.94331e-05	0.00153433
ENSMUSG00000073643	69368	Wdfy1	1094.13	-0.464128	0.117629	3.9457	7.95678e-05	0.00153494
ENSMUSG00000043631	407800	Ecm2	950.288	-0.480791	0.121902	3.94406	8.01124e-05	0.00154344
ENSMUSG00000032050	19684	Rdx	5800.2	-0.475189	0.120542	3.9421	8.07701e-05	0.00155409
ENSMUSG00000062014	63985	Gmfb	1503.44	-0.571442	0.14512	3.93772	8.22582e-05	0.00158068
ENSMUSG00000026434	98415	Nucks1	2774.02	-0.474864	0.12066	3.93555	8.30067e-05	0.001593
ENSMUSG00000047793	208777	Sned1	666.487	0.488038	0.12405	-3.93421	8.34699e-05	0.00159982
ENSMUSG00000034998	14236	Foxn2	481.034	-0.592378	0.150595	3.93358	8.36915e-05	0.001602
ENSMUSG00000033684	104009	Qsox1	1881.22	-0.516716	0.1314	3.93238	8.41099e-05	0.00160466
ENSMUSG00000023800	24001	Tiam2	324.42	-0.645865	0.164248	3.93225	8.41544e-05	0.00160466
ENSMUSG00000043257	230801	Pigv	277.097	0.6686	0.170019	-3.9325	8.40671e-05	0.00160466
ENSMUSG00000040666	50795	Sh3bgr	2633.42	-0.566209	0.144114	3.9289	8.53341e-05	0.00162507
ENSMUSG00000055044	54132	Pdlim1	265.182	-0.564419	0.143708	3.92755	8.58151e-05	0.00163005
ENSMUSG00000023036	93711	Pcdhga9	142.159	0.644878	0.16419	-3.92763	8.57863e-05	0.00163005
ENSMUSG00000032637	233871	Atxn2l	789.085	0.48875	0.124679	-3.92007	8.85218e-05	0.00167503
ENSMUSG00000002985	11816	Apoe	16079.1	-0.515108	0.131393	3.92037	8.84139e-05	0.00167503
ENSMUSG00000046768	80837	Rhoj	858.962	-0.683238	0.174546	3.91438	9.06382e-05	0.0017129
ENSMUSG00000007646	114714	Rad51c	59.0696	0.880575	0.224978	-3.91404	9.07637e-05	0.00171309
ENSMUSG00000068699	68794	Flnc	24093	-0.714556	0.182629	3.9126	9.1306e-05	0.00171932
ENSMUSG00000023991	74123	Foxp4	333.873	0.622439	0.159096	-3.91235	9.14031e-05	0.00171932
ENSMUSG00000006445	13836	Epha2	328.97	-0.799882	0.204456	3.91225	9.14408e-05	0.00171932
ENSMUSG00000046434	15382	Hnrnpa1	115.24	-0.745424	0.190684	3.90922	9.25964e-05	0.00173885
ENSMUSG00000036833	241274	Pnpla7	1085.13	0.411677	0.105376	-3.90674	9.35503e-05	0.00175454
ENSMUSG00000025134	21681	Alyref	384.421	-0.584465	0.149648	3.9056	9.39932e-05	0.00176062
ENSMUSG00000027479	13589	Mapre1	2002.09	-0.440398	0.112814	3.90376	9.47114e-05	0.00177116
ENSMUSG00000038587	83397	Akap12	2478.86	-0.566997	0.145252	3.90354	9.47941e-05	0.00177116
ENSMUSG00000000555	16402	Itga5	1605.97	-0.601695	0.154157	3.90314	9.49538e-05	0.00177192
ENSMUSG00000061100	57262	Retnla	374.642	-0.650043	0.166663	3.90034	9.60578e-05	0.00179027
ENSMUSG00000009545	16535	Kcnq1	1362.32	0.519194	0.133265	-3.89595	9.78161e-05	0.00182075
ENSMUSG00000028088	14263	Fmo5	518.693	0.567112	0.145686	-3.89269	9.91381e-05	0.00184305
ENSMUSG00000030878	12585	Cdr2	582.062	-0.542689	0.139453	3.89154	9.96091e-05	0.00184949
ENSMUSG00000027408	56264	Cpxm1	514.936	-0.630472	0.162053	3.89052	0.000100029	0.00185497
ENSMUSG00000029622	11867	Arpc1b	979.909	-0.582824	0.149872	3.88882	0.000100733	0.0018657
ENSMUSG00000021495	212483	Fam193b	677.153	0.501557	0.129144	-3.8837	0.000102877	0.00190135
ENSMUSG00000053024	21367	Cntn2	474.918	-0.846385	0.217937	3.88362	0.000102914	0.00190135
ENSMUSG00000033732	101943	Sf3b3	1704.3	-0.376355	0.09693	3.88275	0.000103281	0.00190425
ENSMUSG00000024247	106522	Pkdcc	1490.11	-0.57611	0.148392	3.88234	0.000103456	0.00190425
ENSMUSG00000026604	19250	Ptpn14	2714.22	-0.570362	0.146908	3.88244	0.000103414	0.00190425
ENSMUSG00000039239	21808	Tgfb2	538.938	-0.509294	0.131229	3.88096	0.000104044	0.00191271
ENSMUSG00000012017	224024	Scarf2	303.984	-0.612	0.15783	3.87759	0.000105498	0.00193703
ENSMUSG00000051439	12475	Cd14	146.862	-0.683253	0.176308	3.87533	0.000106481	0.00195269
ENSMUSG00000035829	241289	Ppp1r26	215.548	0.694994	0.179425	-3.87346	0.000107303	0.00196532
ENSMUSG00000024193	21652	Phf1	488.514	0.573639	0.148285	-3.86849	0.000109513	0.00200333
ENSMUSG00000004187	16581	Kifc2	140.564	0.655588	0.169528	-3.86714	0.000110119	0.00201142
ENSMUSG00000073858	319622	Itpripl2	2029.13	-0.405968	0.104985	3.8669	0.000110226	0.00201142
ENSMUSG00000029328	50926	Hnrpdl	1694.06	-0.500503	0.129487	3.86529	0.000110958	0.0020223
ENSMUSG00000031613	15446	Hpgd	451.179	-0.770596	0.199385	3.86486	0.000111152	0.00202334
ENSMUSG00000079188	665574	Gm7694	339.463	0.664347	0.172213	-3.85771	0.000114455	0.00207839
ENSMUSG00000018126	207495	Baiap2l2	46.3035	0.980705	0.254424	-3.85461	0.000115915	0.00210233
ENSMUSG00000054641	70945	Mmrn1	349.143	-0.853831	0.221531	3.85423	0.000116095	0.00210303
ENSMUSG00000036975	66343	Tmem177	371.543	0.48587	0.126235	-3.84893	0.000118636	0.00214644
ENSMUSG00000011263	74463	Exoc3l2	86.16	-0.82721	0.214961	3.84818	0.000118997	0.00215034
ENSMUSG00000027288	20402	Zfp106	33354.2	0.362689	0.0942622	-3.84766	0.000119252	0.00215233
ENSMUSG00000026090	72097	2010300C02Rik	117.408	0.780263	0.202827	-3.84695	0.000119599	0.00215598
ENSMUSG00000030082	53421	Sec61a1	2127	-0.491319	0.127739	3.84627	0.000119927	0.00215927
ENSMUSG00000020794	67128	Ube2g1	1220.01	-0.597815	0.155441	3.84594	0.000120093	0.00215964
ENSMUSG00000023036	93703	Pcdhga9	245.234	0.644347	0.167581	-3.84498	0.000120562	0.00216284
ENSMUSG00000024769	240505	Cdc42bpg	638.097	0.494921	0.128712	-3.84518	0.000120464	0.00216284
ENSMUSG00000004460	67838	Dnajb11	1371.48	-0.401521	0.104466	3.84355	0.000121266	0.00217285
ENSMUSG00000037601	18102	Nme1	137.663	-0.652387	0.169795	3.8422	0.000121938	0.00218225
ENSMUSG00000075033	385658	Fam55c	213.504	0.630926	0.164502	-3.83537	0.000125374	0.00223732
ENSMUSG00000034449	192970	Dhrs11	1471.99	0.497261	0.129657	-3.83519	0.000125467	0.00223732
ENSMUSG00000070509	244058	Rgma	754.677	0.624916	0.162934	-3.8354	0.00012536	0.00223732
ENSMUSG00000068551	68910	Zfp467	276.463	0.537934	0.140287	-3.83453	0.000125803	0.00224061
ENSMUSG00000039154	20420	Shd	136.311	0.787994	0.20553	-3.83395	0.0001261	0.00224322
ENSMUSG00000063406	73130	Tmed5	810.119	-0.76485	0.1996	3.83191	0.000127152	0.00225923
ENSMUSG00000037196	69310	Pacrg	49.4644	0.86949	0.226952	-3.83117	0.000127535	0.00226332
ENSMUSG00000024533	68166	Spire1	189.117	-0.633328	0.165375	3.82965	0.000128327	0.00227467
ENSMUSG00000037686	104816	Aspg	33.3609	0.984741	0.257177	-3.82905	0.00012864	0.0022775
ENSMUSG00000039741	268515	Bahcc1	445.014	0.7434	0.194204	-3.82793	0.000129226	0.00228243
ENSMUSG00000031273	94216	Col4a6	1034.11	-0.417815	0.109144	3.82811	0.000129133	0.00228243
ENSMUSG00000022754	56277	Tmem45a	98.3594	-0.738088	0.192832	3.82762	0.00012939	0.00228261
ENSMUSG00000034158	320184	Lrrc58	5246.68	-0.607291	0.158745	3.82559	0.00013046	0.00229603
ENSMUSG00000071656	68852	Lrrn4cl	195.78	-0.649971	0.169899	3.82562	0.000130442	0.00229603
ENSMUSG00000027820	17380	Mme	479.552	-0.546355	0.142947	3.82209	0.000132325	0.0023261
ENSMUSG00000024993	67894	Fam45a	517.88	-0.571928	0.149753	3.81914	0.000133915	0.00235128
ENSMUSG00000021388	66695	Aspn	341.474	-0.587138	0.153801	3.81752	0.000134798	0.00236398
ENSMUSG00000054477	140492	Kcnn2	107.587	0.745943	0.19546	-3.81635	0.000135439	0.00237242
ENSMUSG00000050064	242109	Zfp697	295.31	-0.692234	0.181481	3.81436	0.000136538	0.00238886
ENSMUSG00000018841	19364	Rad51l3	445.833	0.51589	0.135268	-3.81383	0.000136831	0.00239117
ENSMUSG00000004044	19285	Ptrf	7408.57	-0.413932	0.108664	3.80929	0.000139364	0.00243045
ENSMUSG00000031442	17207	Mcf2l	1375.06	-0.654626	0.171853	3.80922	0.000139406	0.00243045
ENSMUSG00000021508	57266	Cxcl14	277.728	-0.647567	0.170115	3.80665	0.000140861	0.00245293
ENSMUSG00000048004	217951	Tmem196	44.1235	0.973394	0.255846	-3.80461	0.000142028	0.00247035
ENSMUSG00000022758	18440	P2rx6	143.233	0.697933	0.183482	-3.80383	0.000142476	0.00247525
ENSMUSG00000027611	19124	Procr	183.005	-0.738438	0.194246	3.80155	0.000143792	0.0024952
ENSMUSG00000028843	73723	Sh3bgrl3	227.309	-0.624722	0.164423	3.79948	0.000145002	0.00251325
ENSMUSG00000036617	208618	Etl4	430.195	0.620636	0.163398	-3.79831	0.000145685	0.00252215
ENSMUSG00000035545	232798	Leng8	2034.61	0.39918	0.105125	-3.79721	0.000146335	0.00253045
ENSMUSG00000007815	11848	Rhoa	1426.44	-0.373059	0.098272	3.79619	0.000146939	0.00253499
ENSMUSG00000048583	16002	Igf2	2534.41	-0.690326	0.181841	3.79632	0.000146862	0.00253499
ENSMUSG00000032554	22041	Trf	3278.75	-0.434829	0.114614	3.79385	0.00014833	0.00255011
ENSMUSG00000020092	27355	X99384	787.888	-0.627172	0.165302	3.7941	0.000148179	0.00255011
ENSMUSG00000037795	333789	N4bp2	965.771	0.481706	0.127053	-3.79138	0.000149811	0.00257259
ENSMUSG00000021171	52635	Esyt2	2688.15	-0.511559	0.134958	3.7905	0.000150344	0.00257876
ENSMUSG00000004347	18575	Pde1c	2455.3	0.515889	0.13619	-3.788	0.000151862	0.0026018
ENSMUSG00000057411	214917	Fam173a	377.998	0.586473	0.154863	-3.78703	0.000152456	0.00260897
ENSMUSG00000025809	16412	Itgb1	14997.9	-0.416371	0.109968	3.78629	0.000152911	0.00261374
ENSMUSG00000037660	238057	Gdf7	235.511	0.648587	0.171569	-3.78033	0.000156619	0.00267404
ENSMUSG00000033377	114301	Palmd	2215.66	-0.465433	0.123136	3.77983	0.000156936	0.00267639
ENSMUSG00000042423	14123	Fbrs	402.615	0.541579	0.143463	-3.77504	0.000159982	0.00272519
ENSMUSG00000021313	20191	Ryr2	168144	0.555845	0.147456	-3.76957	0.000163529	0.00277924
ENSMUSG00000002205	101568	Vrk3	429.825	0.467376	0.124035	-3.76811	0.000164489	0.002786
ENSMUSG00000036943	235442	Rab8b	843.355	-0.464368	0.123228	3.76836	0.000164325	0.002786
ENSMUSG00000027254	17754	Mtap1a	2342.96	0.573227	0.152115	-3.76837	0.000164314	0.002786
ENSMUSG00000060548	29820	Tnfrsf19	471.001	0.640353	0.170038	-3.76594	0.000165925	0.00280711
ENSMUSG00000024109	18189	Nrxn1	63.4023	-0.917825	0.243789	3.76483	0.000166664	0.00281641
ENSMUSG00000054675	231633	Tmem119	753.243	-0.769502	0.204471	3.76337	0.000167636	0.00282702
ENSMUSG00000021474	14057	Sfxn1	545.313	-0.504216	0.133982	3.76332	0.000167672	0.00282702
ENSMUSG00000060962	73712	Dmkn	97.8588	0.961837	0.255699	-3.76161	0.000168825	0.00284001
ENSMUSG00000022701	212153	2610015P09Rik	154.242	0.723796	0.19245	-3.76096	0.000169263	0.00284415
ENSMUSG00000028382	230257	Rod1	1530.57	-0.559346	0.149003	3.75391	0.000174094	0.00292203
ENSMUSG00000024827	104174	Gldc	54.288	-0.857211	0.228401	3.75309	0.000174668	0.00292834
ENSMUSG00000029333	320292	Rasgef1b	900.418	-0.787051	0.209842	3.75068	0.000176356	0.00295332
ENSMUSG00000060843	216033	Ctnna3	3413.6	0.506448	0.135039	-3.75039	0.000176562	0.00295343
ENSMUSG00000027706	69276	Sec62	2494.56	-0.4632	0.123535	3.74955	0.000177149	0.00295993
ENSMUSG00000040774	99712	Cept1	719.931	-0.532811	0.142141	3.74847	0.00017792	0.00296131
ENSMUSG00000045680	21412	Tcf21	315.419	-0.593034	0.158214	3.74831	0.00017803	0.00296131
ENSMUSG00000005087	12505	Cd44	698.962	-0.522904	0.139502	3.74836	0.000177997	0.00296131
ENSMUSG00000021756	16195	Il6st	12168.3	-0.355014	0.0946955	3.74901	0.000177535	0.00296131
ENSMUSG00000052336	13051	Cx3cr1	71.3102	-0.949156	0.253318	3.74689	0.000179038	0.00297475
ENSMUSG00000032806	214601	Slc10a3	211.607	-0.574776	0.153455	3.74557	0.000179987	0.00298718
ENSMUSG00000038991	105245	Txndc5	2889	-0.423937	0.113248	3.74345	0.000181513	0.00300914
ENSMUSG00000063681	170788	Crb1	12.3908	1.06505	0.28488	-3.7386	0.000185046	0.0030643
ENSMUSG00000067194	66235	Eif1ax	992.397	-0.442039	0.118262	3.73779	0.000185649	0.00307085
ENSMUSG00000023000	13363	Dhh	55.9238	-1.01457	0.271485	3.7371	0.000186158	0.00307585
ENSMUSG00000061322	68922	Dnaic1	45.2275	-0.875126	0.234209	3.73651	0.000186592	0.00307621
ENSMUSG00000022797	22042	Tfrc	2936.15	-0.972704	0.260324	3.73651	0.000186594	0.00307621
ENSMUSG00000061607	240087	Mdc1	620.822	0.474459	0.12708	-3.73355	0.000188797	0.00310908
ENSMUSG00000049929	78134	Lpar4	58.9581	-0.971574	0.260369	3.73153	0.000190324	0.00313075
ENSMUSG00000028249	53378	Sdcbp	2773.91	-0.425331	0.114001	3.73094	0.00019077	0.00313116
ENSMUSG00000006494	228026	Pdk1	5647.1	0.328211	0.0879667	-3.73108	0.000190658	0.00313116
ENSMUSG00000055322	21961	Tns1	30135.3	0.589113	0.157958	-3.72955	0.000191823	0.00314496
ENSMUSG00000063810	236266	Alms1	497.295	0.53604	0.143744	-3.72914	0.000192134	0.00314659
ENSMUSG00000031767	67528	Nudt7	833.964	0.535908	0.14383	-3.72598	0.000194559	0.0031828
ENSMUSG00000009614	192166	Sardh	273.887	-0.650042	0.174531	3.7245	0.000195699	0.00319792
ENSMUSG00000031517	234267	Gpm6a	1946	-0.657655	0.176649	3.72294	0.000196913	0.00321422
ENSMUSG00000051184	66056	Zfp524	134.587	0.677443	0.181999	-3.72224	0.000197463	0.00321434
ENSMUSG00000026791	56017	Slc2a8	452.828	0.5085	0.136597	-3.72263	0.00019716	0.00321434
ENSMUSG00000021728	13723	Emb	95.1629	-0.778624	0.209189	3.7221	0.000197569	0.00321434
ENSMUSG00000025723	68039	Nmb	49.4689	-0.999493	0.268585	3.72132	0.000198182	0.00322079
ENSMUSG00000017493	16010	Igfbp4	6550.35	-0.437098	0.117539	3.71874	0.000200217	0.0032503
ENSMUSG00000036792	109241	Mbd5	799.628	0.422868	0.113724	-3.71837	0.000200516	0.00325159
ENSMUSG00000054619	70152	Mettl7a1	1191.75	0.413245	0.111203	-3.71613	0.000202294	0.00327686
ENSMUSG00000047888	213988	Tnrc6b	4899.91	0.49294	0.132771	-3.71272	0.000205046	0.00331421
ENSMUSG00000028277	56228	Ube2j1	1169.22	-0.496421	0.133761	3.71126	0.000206229	0.0033297
ENSMUSG00000039787	99151	Cercam	172.963	-0.68244	0.184255	3.70378	0.000212408	0.00342575
ENSMUSG00000075415	14269	Fnbp1	1161.38	0.507324	0.136997	-3.70317	0.000212926	0.00343037
ENSMUSG00000026600	20652	Soat1	581.341	-0.508575	0.137354	3.70267	0.000213345	0.0034334
ENSMUSG00000041798	103988	Gck	53.8037	0.957758	0.258754	-3.70142	0.0002144	0.00344664
ENSMUSG00000042305	57439	Tmem183a	559.624	-0.429706	0.116293	3.69503	0.000219862	0.00352862
ENSMUSG00000002997	19088	Prkar2b	201.719	-0.784967	0.212702	3.69045	0.000223858	0.00358704
ENSMUSG00000069171	13865	Nr2f1	215.22	0.53755	0.14583	-3.68614	0.000227682	0.00362874
ENSMUSG00000007613	21812	Tgfbr1	1128.62	-0.506286	0.137318	3.68696	0.000226952	0.00362874
ENSMUSG00000020546	20913	Stxbp4	426.906	0.519448	0.140914	-3.68629	0.00022755	0.00362874
ENSMUSG00000032648	19309	Pygm	18082.2	0.399004	0.108244	-3.68617	0.000227655	0.00362874
ENSMUSG00000025241	17281	Fyco1	12534.7	0.526459	0.142888	-3.68441	0.000229231	0.00364952
ENSMUSG00000025059	14933	Gyk	900.52	-0.470333	0.127674	3.68387	0.000229723	0.00365344
ENSMUSG00000004771	53869	Rab11a	1783.55	-0.473832	0.128726	3.68095	0.00023237	0.00369158
ENSMUSG00000056851	18521	Pcbp2	1179.04	0.528869	0.143739	-3.67936	0.000233817	0.00370663
ENSMUSG00000063529	380842	Gm1574	56.0645	0.812848	0.220921	-3.67936	0.000233816	0.00370663
ENSMUSG00000030539	20352	Sema4b	615.321	0.445137	0.121069	-3.67673	0.000236245	0.00374114
ENSMUSG00000033585	17984	Ndn	395.429	-0.528041	0.143693	3.67478	0.000238059	0.00376584
ENSMUSG00000029862	12723	Clcn1	554.956	0.491335	0.133766	-3.67309	0.000239635	0.00378675
ENSMUSG00000030148	26888	Clec4a2	37.4869	-0.93151	0.253645	3.6725	0.000240187	0.00379143
ENSMUSG00000022095	239170	Fam160b2	568.776	0.609424	0.166144	-3.66804	0.000244413	0.00385405
ENSMUSG00000020486	18952	38231	794.135	0.458741	0.125108	-3.66677	0.000245637	0.00386924
ENSMUSG00000026399	13136	Cd55	578.937	-0.52492	0.143239	3.66464	0.000247688	0.00389742
ENSMUSG00000043008	239743	Klhl6	336.547	-0.617764	0.168707	3.66176	0.000250486	0.00393727
ENSMUSG00000027489	56846	Necab3	22.5585	0.974378	0.266248	-3.65966	0.000252551	0.00396553
ENSMUSG00000032558	74025	Nphp3	719.727	0.408651	0.111711	-3.6581	0.000254091	0.00398549
ENSMUSG00000059439	192197	Bcas3	948.256	0.389101	0.106389	-3.65736	0.000254831	0.00399289
ENSMUSG00000025597	237010	Klhl4	349.21	-0.564251	0.154317	3.65643	0.00025575	0.00400306
ENSMUSG00000051483	12408	Cbr1	462.79	0.445858	0.121968	-3.65552	0.000256661	0.0040131
ENSMUSG00000039891	378431	Txlnb	20052.1	0.422562	0.115621	-3.65471	0.000257468	0.00401942
ENSMUSG00000038256	77578	Bcl9	278.623	0.599581	0.164063	-3.65458	0.000257607	0.00401942
ENSMUSG00000040711	268396	Sh3pxd2b	507.997	-0.588835	0.161232	3.65209	0.000260117	0.00405433
ENSMUSG00000037119	210998	D15Ertd621e	1102.61	-0.524627	0.143666	3.6517	0.000260508	0.00405617
ENSMUSG00000056476	329650	Med12l	511.142	0.558036	0.152837	-3.65119	0.000261024	0.00405995
ENSMUSG00000038387	20130	Rras	465.236	-0.572737	0.1569	3.65033	0.000261903	0.00406834
ENSMUSG00000028960	63958	Ube4b	1475.71	0.408004	0.111778	-3.65013	0.000262111	0.00406834
ENSMUSG00000030269	97287	Mtmr14	533.19	0.445392	0.122121	-3.64713	0.000265185	0.00411175
ENSMUSG00000027861	12373	Casq2	16042	-0.507044	0.139048	3.64654	0.000265796	0.00411693
ENSMUSG00000012405	66480	Rpl15	455.715	-0.50166	0.137588	3.64611	0.000266241	0.00411952
ENSMUSG00000021112	56217	Mpp5	2120.52	-0.486072	0.133328	3.64568	0.000266681	0.00412204
ENSMUSG00000036752	227613	Tubb4b	2166.32	-0.563859	0.154701	3.64483	0.000267572	0.00413152
ENSMUSG00000075602	110454	Ly6a	714.073	-0.441772	0.121245	3.64364	0.000268814	0.00414637
ENSMUSG00000030352	109246	Tspan9	2361.54	-0.470785	0.12931	3.64074	0.000271858	0.00418898
ENSMUSG00000033107	67664	Rnf125	82.264	-0.821796	0.225872	3.63832	0.000274425	0.00422416
ENSMUSG00000025782	209361	Taf3	320.198	0.498376	0.136995	-3.63792	0.000274847	0.0042247
ENSMUSG00000045136	73710	Tubb2b	29.6079	-0.947726	0.260525	3.63775	0.000275029	0.0042247
ENSMUSG00000020841	12874	Cpd	7716.93	-0.381113	0.104797	3.63669	0.00027616	0.00423769
ENSMUSG00000052712	80748	BC004004	4154.35	0.364662	0.100313	-3.63523	0.000277734	0.00424868
ENSMUSG00000021458	72061	2010111I01Rik	1164.82	-0.456715	0.125633	3.63531	0.000277643	0.00424868
ENSMUSG00000021130	108760	Galntl1	210.765	-0.745712	0.205131	3.6353	0.00027766	0.00424868
ENSMUSG00000025804	12768	Ccr1	48.9589	-0.912488	0.251131	3.63351	0.000279588	0.00427263
ENSMUSG00000038201	16495	Kcna7	337.182	0.590001	0.162432	-3.63229	0.000280915	0.00428653
ENSMUSG00000047867	231931	Gimap6	852.443	-0.588021	0.161893	3.63215	0.000281074	0.00428653
ENSMUSG00000033458	330554	Fan1	314.94	0.528424	0.145642	-3.62824	0.000285363	0.00434301
ENSMUSG00000022220	104110	Adcy4	861.804	-0.58666	0.161711	3.62783	0.000285818	0.00434549
ENSMUSG00000026603	226830	Smyd2	174.51	-0.647295	0.178444	3.62745	0.000286232	0.00434733
ENSMUSG00000059173	18573	Pde1a	556.85	-0.549711	0.151561	3.627	0.000286736	0.00435054
ENSMUSG00000033720	94282	Sfxn5	146.277	0.627599	0.173061	-3.62647	0.000287326	0.00435503
ENSMUSG00000054206	16904	Gzmm	90.2001	0.763602	0.2107	-3.62411	0.000289957	0.00439044
ENSMUSG00000040543	327958	Pitpnm3	109.793	0.73162	0.201925	-3.62323	0.00029095	0.00440099
ENSMUSG00000035486	216166	Plk5	23.9236	0.95809	0.26452	-3.62199	0.000292346	0.00441761
ENSMUSG00000038022	330323	Fam188b	350.615	0.502187	0.138757	-3.61919	0.000295526	0.00446112
ENSMUSG00000024095	72692	Hnrpll	792.581	-0.456395	0.126143	3.61807	0.000296809	0.00447594
ENSMUSG00000034910	72135	Pygo1	287.722	0.499477	0.138064	-3.61772	0.000297205	0.00447737
ENSMUSG00000036026	224807	Tmem63b	1367.93	0.418774	0.115804	-3.61623	0.00029893	0.0044988
ENSMUSG00000079055	110893	Slc8a3	60.8606	0.814443	0.225238	-3.61592	0.000299286	0.00449959
ENSMUSG00000028480	384009	Glipr2	120.107	-0.655519	0.181349	3.61469	0.000300711	0.00451644
ENSMUSG00000028838	56219	Extl1	1695.18	0.440198	0.121796	-3.61422	0.000301253	0.00452002
ENSMUSG00000029624	71799	Ptcd1	539.553	0.446233	0.123532	-3.61228	0.000303521	0.00454944
ENSMUSG00000018001	19159	Cyth3	1171.29	-0.433011	0.119929	3.61055	0.000305552	0.00457527
ENSMUSG00000022793	56375	B4galt4	333.941	-0.499671	0.138434	3.60945	0.00030685	0.00459008
ENSMUSG00000024353	69816	2010001M09Rik	47.5359	0.891983	0.247276	-3.60723	0.00030948	0.00462191
ENSMUSG00000006740	16573	Kif5b	7053.46	-0.39483	0.109503	3.60564	0.000311387	0.00464392
ENSMUSG00000039782	231207	Cpeb2	1383.16	0.57327	0.159015	-3.60513	0.000311998	0.0046452
ENSMUSG00000023036	93707	Pcdhga9	72.6487	0.795313	0.220611	-3.60505	0.000312098	0.0046452
ENSMUSG00000040694	11811	Apobec2	3729.83	0.392103	0.108782	-3.60447	0.000312787	0.00465078
ENSMUSG00000038204	117590	Asb10	799.303	0.412136	0.114405	-3.60242	0.000315263	0.00468292
ENSMUSG00000025175	63828	Fn3k	318.307	0.514103	0.1428	-3.60015	0.000318032	0.00471933
ENSMUSG00000038212	66631	Hiatl1	740.537	-0.496223	0.137901	3.5984	0.000320178	0.00474643
ENSMUSG00000021236	12499	Entpd5	4244.31	0.426958	0.118732	-3.59599	0.000323165	0.00478594
ENSMUSG00000015852	80891	Fcrls	279.23	-0.564288	0.15703	3.59352	0.000326247	0.00482676
ENSMUSG00000009394	20965	Syn2	1267.38	-0.428024	0.11918	3.59139	0.000328917	0.00485766
ENSMUSG00000020668	16570	Kif3c	334.527	0.492819	0.137224	-3.59133	0.000328989	0.00485766
ENSMUSG00000020122	13649	Egfr	667.475	-0.490339	0.136604	3.58949	0.000331321	0.00488238
ENSMUSG00000030880	26939	Polr3e	364.277	-0.470814	0.131393	3.58324	0.000339353	0.00499579
ENSMUSG00000030739	71960	Myh14	2896.06	0.512073	0.142925	-3.58282	0.000339907	0.00499899
ENSMUSG00000024074	50766	Crim1	2707.46	-0.49574	0.138387	3.58226	0.000340632	0.00500469
ENSMUSG00000020358	15384	Hnrnpab	2670.2	-0.377288	0.105348	3.58134	0.000341836	0.00501742
ENSMUSG00000027429	27054	Sec23b	485.723	-0.453388	0.126635	3.58028	0.00034323	0.00503292
ENSMUSG00000022200	66629	Golph3	2493.7	-0.4051	0.113178	3.5793	0.000344517	0.0050468
ENSMUSG00000036334	242050	Igsf10	433.257	-0.525242	0.146792	3.57814	0.000346051	0.00506428
ENSMUSG00000041355	66256	Ssr2	838.676	-0.409139	0.114383	3.57693	0.000347652	0.0050827
ENSMUSG00000023912	74011	Slc25a27	174.893	0.733549	0.205174	-3.57525	0.00034989	0.00511039
ENSMUSG00000051344	241075	Plekhm3	857.457	0.438551	0.122733	-3.57322	0.000352624	0.00514526
ENSMUSG00000005973	19672	Rcn1	1283.62	-0.38651	0.108241	3.57083	0.000355847	0.00518719
ENSMUSG00000004530	23790	Coro1c	790.989	-0.502294	0.140759	3.56847	0.00035907	0.00522806
ENSMUSG00000048776	19227	Pthlh	68.4529	-0.82489	0.231174	3.56826	0.000359355	0.00522806
ENSMUSG00000025350	19682	Rdh5	74.3189	0.739444	0.207599	-3.56189	0.000368199	0.00535149
ENSMUSG00000022032	71145	Scara5	1594.76	-0.551642	0.155018	3.55856	0.000372897	0.0054093
ENSMUSG00000062991	211323	Nrg1	41.4057	-0.911164	0.256049	3.55855	0.000372904	0.0054093
ENSMUSG00000027784	242083	Ppm1l	1013.39	0.39842	0.111978	-3.55802	0.000373668	0.00541508
ENSMUSG00000040212	13732	Emp3	401.334	-0.556955	0.156556	3.55753	0.000374352	0.00541971
ENSMUSG00000021282	217869	Eif5	3896.5	-0.508391	0.14296	3.55617	0.000376307	0.00544271
ENSMUSG00000031703	71927	Itfg1	2234.66	-0.440225	0.123852	3.55444	0.000378786	0.00547323
ENSMUSG00000031841	12554	Cdh13	4802.21	0.367613	0.103453	-3.55344	0.000380224	0.00548868
ENSMUSG00000025025	17859	Mxi1	1029.98	0.36781	0.103586	-3.55077	0.000384101	0.00553926
ENSMUSG00000008206	67260	Lass4	1450.61	0.397104	0.111861	-3.54998	0.000385261	0.0055506
ENSMUSG00000047996	546336	Prrg1	409.469	-0.645711	0.181961	3.54862	0.000387259	0.00557398
ENSMUSG00000026069	17082	Il1rl1	34.6129	-0.924652	0.260709	3.54668	0.000390124	0.00560979
ENSMUSG00000032115	12282	Hyou1	2152.86	-0.459693	0.129626	3.54631	0.000390667	0.00561216
ENSMUSG00000036764	30045	Dnajc12	159.493	0.600388	0.169483	-3.54248	0.000396384	0.00568878
ENSMUSG00000066150	20529	Slc31a1	704.948	-0.502337	0.141828	3.54187	0.000397303	0.00569647
ENSMUSG00000035849	268481	Krt222	888.107	-0.514783	0.145461	3.53897	0.000401691	0.00575382
ENSMUSG00000028116	59006	Myoz2	19510.2	-0.466452	0.131825	3.53843	0.00040252	0.00576014
ENSMUSG00000032245	76524	Cln6	290.606	0.474961	0.13428	-3.5371	0.000404549	0.00578361
ENSMUSG00000041889	77552	Shisa4	66.3838	-0.765495	0.216452	3.53656	0.000405375	0.00578985
ENSMUSG00000007097	98660	Atp1a2	9957	0.425086	0.120243	-3.53521	0.000407444	0.0058138
ENSMUSG00000020747	71947	2310067B10Rik	2698.11	0.409153	0.115892	-3.53047	0.000414818	0.00591334
ENSMUSG00000025608	27205	Podxl	3827.62	-0.617633	0.174987	3.5296	0.000416187	0.00592718
ENSMUSG00000026797	20910	Stxbp1	786.988	0.452871	0.128346	-3.52853	0.000417877	0.00594554
ENSMUSG00000018263	21388	Tbx5	4446.41	0.358398	0.101623	-3.52674	0.000420707	0.00598007
ENSMUSG00000039395	381269	Mreg	533.179	0.408051	0.115715	-3.52633	0.000421354	0.00598064
ENSMUSG00000039683	330222	Sdk1	103.642	-0.713506	0.202344	3.52621	0.000421551	0.00598064
ENSMUSG00000004263	13498	Atn1	368.442	0.69943	0.198451	-3.52445	0.000424361	0.00601475
ENSMUSG00000029683	93677	Lmod2	11472.4	-0.549952	0.156115	3.52274	0.000427103	0.00604785
ENSMUSG00000073968	101700	Trim68	471.184	0.450478	0.12789	-3.52238	0.000427689	0.00605038
ENSMUSG00000046345	69576	2310010M20Rik	365.134	0.591133	0.167835	-3.52212	0.000428116	0.00605065
ENSMUSG00000040734	333654	Ppp1r13l	570.324	0.608229	0.172736	-3.52114	0.000429695	0.0060629
ENSMUSG00000025278	286940	Flnb	3870.9	-0.489148	0.13892	3.52108	0.000429799	0.0060629
ENSMUSG00000067158	12829	Col4a4	867.294	-0.483346	0.137306	3.5202	0.000431216	0.00607711
ENSMUSG00000040747	12508	Cd53	160.955	-0.690552	0.196317	3.51753	0.000435586	0.00612708
ENSMUSG00000038058	107607	Nod1	1046.76	0.368875	0.10497	-3.5141	0.000441242	0.00620077
ENSMUSG00000050345	214639	4930486L24Rik	62.3239	-0.805434	0.22922	3.5138	0.00044174	0.0062019
ENSMUSG00000031209	15203	Heph	371.569	-0.588554	0.167532	3.51309	0.000442925	0.00621266
ENSMUSG00000005465	50931	Il27ra	163.235	-0.663986	0.189106	3.51118	0.000446126	0.00625166
ENSMUSG00000029093	81840	Sorcs2	182.65	0.61624	0.175566	-3.51001	0.000448089	0.00626758
ENSMUSG00000030754	70349	Copb1	2441.48	-0.44831	0.127724	3.51	0.000448106	0.00626758
ENSMUSG00000033863	16601	Klf9	4676.96	-0.64943	0.185179	3.50703	0.00045314	0.00633202
ENSMUSG00000040537	11496	Adam22	661.165	0.540449	0.15412	-3.50668	0.000453732	0.00633433
ENSMUSG00000033184	66676	Tmed7	2295.73	-0.480501	0.137096	3.50484	0.000456874	0.00637221
ENSMUSG00000029162	16548	Khk	218.369	0.588838	0.16807	-3.50354	0.000459123	0.00639757
ENSMUSG00000041180	226098	Hectd2	189.247	-0.67725	0.193361	3.50251	0.000460893	0.00641021
ENSMUSG00000022280	30945	Rnf19a	1202.75	-0.477621	0.136398	3.50168	0.000462326	0.00642412
ENSMUSG00000043131	232157	Mob1a	554.596	-0.476162	0.136072	3.49934	0.000466408	0.00647478
ENSMUSG00000020844	18230	Nxn	584.744	-0.475325	0.135943	3.49652	0.000471373	0.00653761
ENSMUSG00000004462	70573	Tbccd1	301.46	0.463897	0.132752	-3.49447	0.000475005	0.00657569
ENSMUSG00000024168	407831	Tmem204	747.578	-0.54431	0.15576	3.49455	0.000474856	0.00657569
ENSMUSG00000013236	19280	Ptprs	3838.09	0.435394	0.124689	-3.49183	0.000479728	0.0066349
ENSMUSG00000060862	230848	Zbtb40	457.907	0.525382	0.150552	-3.48971	0.000483548	0.00668151
ENSMUSG00000026159	15463	Agfg1	1434.62	-0.455514	0.130558	3.48896	0.000484901	0.00668776
ENSMUSG00000031111	209268	Igsf1	1002.67	-0.509091	0.145914	3.48899	0.000484846	0.00668776
ENSMUSG00000024659	16952	Anxa1	1337.82	-0.569354	0.163306	3.48642	0.00048953	0.00674534
ENSMUSG00000032501	211770	Trib1	469.11	-0.783693	0.224807	3.48607	0.000490176	0.00674799
ENSMUSG00000074748	382423	Atxn7l3b	1383.25	-0.40231	0.115434	3.48518	0.000491802	0.0067641
ENSMUSG00000020949	30795	Fkbp3	1106.16	-0.435329	0.124928	3.48463	0.000492812	0.00676752
ENSMUSG00000048787	233805	Dcun1d3	717.884	-0.496043	0.142365	3.4843	0.000493417	0.00676752
ENSMUSG00000022440	72709	C1qtnf6	123.835	-0.630632	0.181128	3.48169	0.000498256	0.00682757
ENSMUSG00000022548	11815	Apod	85.5715	0.743077	0.213512	-3.48027	0.000500914	0.00685768
ENSMUSG00000027253	228357	Lrp4	1551.73	0.412049	0.118508	-3.47698	0.000507094	0.00693432
ENSMUSG00000029207	11787	Apbb2	2650.4	0.346803	0.0997479	-3.47679	0.000507446	0.00693432
ENSMUSG00000026854	74270	Usp20	1035.61	0.44396	0.127725	-3.4759	0.000509143	0.0069397
ENSMUSG00000039156	116873	Stim2	647.518	-0.434236	0.124921	3.47608	0.000508801	0.0069397
ENSMUSG00000038801	338417	Scgb1c1	42.3907	-0.887922	0.255455	3.47585	0.000509241	0.0069397
ENSMUSG00000023092	14199	Fhl1	6376.18	-0.467827	0.134607	3.47552	0.000509872	0.00694192
ENSMUSG00000041115	245666	Iqsec2	754.533	0.637387	0.183447	-3.47451	0.000511787	0.00696161
ENSMUSG00000034936	80981	Arl4d	972.316	-0.611133	0.175931	3.47371	0.00051331	0.00697595
ENSMUSG00000058488	16591	Kl	25.6791	-0.935293	0.269342	3.47251	0.00051561	0.00700079
ENSMUSG00000024006	106504	Stk38	1245.09	-0.390122	0.112401	3.47079	0.000518935	0.00703629
ENSMUSG00000049092	70713	Gpr137c	170.744	0.609841	0.175725	-3.47042	0.000519645	0.00703629
ENSMUSG00000042567	674895	Nek10	18.8324	-0.971451	0.279919	3.47048	0.000519535	0.00703629
ENSMUSG00000046714	14234	Foxc2	142.004	-0.793819	0.228795	3.46956	0.000521311	0.00705242
ENSMUSG00000040896	56543	Kcnd3	773.325	0.520545	0.15007	-3.46867	0.00052304	0.00706297
ENSMUSG00000050192	208691	Eif5a2	146.943	-0.636594	0.183527	3.46867	0.000523042	0.00706297
ENSMUSG00000090394	67647	4930523C07Rik	488.228	-0.591604	0.170773	3.46426	0.000531684	0.00716663
ENSMUSG00000024302	13527	Dtna	1623.92	-0.387529	0.111903	3.46309	0.000534005	0.00717838
ENSMUSG00000044674	14362	Fzd1	459.542	-0.53935	0.155722	3.46354	0.000533119	0.00717838
ENSMUSG00000032657	68521	Fam189b	84.8963	0.744888	0.215083	-3.46326	0.000533672	0.00717838
ENSMUSG00000014164	100503085	Klhl3	103.106	0.771047	0.222682	-3.46254	0.000535098	0.00718008
ENSMUSG00000022836	107589	Mylk	617.574	-0.462037	0.133451	3.46223	0.000535723	0.00718198
ENSMUSG00000024063	77889	Lbh	984.814	-0.476161	0.137563	3.46141	0.000537363	0.00719747
ENSMUSG00000046491	69183	C1qtnf2	108.396	-0.706486	0.20412	3.46113	0.000537923	0.00719847
ENSMUSG00000018920	66102	Cxcl16	359.221	-0.533417	0.1542	3.45926	0.000541661	0.00723639
ENSMUSG00000054752	319636	Fsd1l	1934.3	-0.471704	0.136361	3.45923	0.000541731	0.00723639
ENSMUSG00000049076	78618	Acap2	1836.67	-0.422548	0.122217	3.45736	0.000545499	0.00726746
ENSMUSG00000036473	224617	Tbc1d24	512.017	0.41854	0.121058	-3.45735	0.000545524	0.00726746
ENSMUSG00000070814	321008	6330408A02Rik	231.12	0.534589	0.154612	-3.45762	0.000544972	0.00726746
ENSMUSG00000038390	14788	Gpr162	186.323	0.646035	0.187108	-3.45274	0.000554915	0.00737933
ENSMUSG00000037010	30878	Apln	67.7036	-0.947381	0.274427	3.45222	0.000555989	0.007387
ENSMUSG00000063849	66812	Ppcdc	195.581	0.557096	0.16146	-3.45037	0.000559824	0.0074313
ENSMUSG00000067586	13610	S1pr3	631.301	-0.650844	0.188754	3.44811	0.000564523	0.00748699
ENSMUSG00000017817	59091	Jph2	11190.6	-0.49281	0.14296	3.44718	0.000566468	0.00750608
ENSMUSG00000052534	18514	Pbx1	1727.86	0.49685	0.144227	-3.44492	0.000571231	0.00756245
ENSMUSG00000007041	114584	Clic1	1242.92	-0.589099	0.171071	3.44359	0.000574055	0.00759307
ENSMUSG00000026020	55989	Nop58	544.28	-0.46579	0.135276	3.44326	0.000574752	0.00759553
ENSMUSG00000045114	69017	Prrt2	50.6282	0.945707	0.274688	-3.44284	0.000575648	0.0076006
ENSMUSG00000051550	68490	Zfp579	930.367	0.621567	0.180557	-3.44249	0.000576393	0.00760367
ENSMUSG00000029591	22256	Ung	221.061	-0.564831	0.164115	3.44167	0.000578135	0.0076199
ENSMUSG00000019997	14219	Ctgf	17187.7	-0.979261	0.284583	3.44104	0.000579478	0.00763082
ENSMUSG00000041775	69546	Mapk1ip1	333.825	0.453107	0.131695	-3.44058	0.000580468	0.00763708
ENSMUSG00000029816	93695	Gpnmb	103.959	0.746436	0.217226	-3.43622	0.000589896	0.00775208
ENSMUSG00000041849	239319	Card6	146.691	0.566821	0.164974	-3.43582	0.000590774	0.00775208
ENSMUSG00000031748	14681	Gnao1	2161.91	0.434469	0.12651	-3.43426	0.000594166	0.00778971
ENSMUSG00000029084	12494	Cd38	428.278	-0.553746	0.16131	3.4328	0.000597386	0.00782502
ENSMUSG00000001300	13642	Efnb2	683.281	-0.449795	0.131089	3.43123	0.000600849	0.00786345
ENSMUSG00000022205	20024	Sub1	894.483	-0.46413	0.135329	3.42964	0.000604387	0.00790279
ENSMUSG00000028996	63954	Rbp7	601.692	-0.749107	0.218508	3.42828	0.000607422	0.00793548
ENSMUSG00000031451	14456	Gas6	7150.36	-0.405624	0.118344	3.4275	0.000609158	0.00795118
ENSMUSG00000021186	23876	Fbln5	1032.3	-0.576671	0.168407	3.42428	0.000616429	0.00801789
ENSMUSG00000022353	211401	Mtss1	985.111	0.471736	0.137757	-3.42441	0.000616139	0.00801789
ENSMUSG00000038773	277250	Kdm3b	1932.58	0.381786	0.111482	-3.42463	0.000615633	0.00801789
ENSMUSG00000061731	14042	Ext1	1484.14	-0.400565	0.117007	3.42342	0.000618379	0.00802919
ENSMUSG00000024317	56515	Rnf138	192.724	-0.674208	0.196932	3.42356	0.000618071	0.00802919
ENSMUSG00000007476	241296	Lrrc8a	2108.08	-0.638662	0.186644	3.42181	0.000622051	0.00806982
ENSMUSG00000070044	212326	Fam149a	232.105	-0.530701	0.155151	3.42055	0.000624948	0.00809794
ENSMUSG00000009566	14287	Fpgs	187.577	-0.574507	0.167977	3.42016	0.000625854	0.00809794
ENSMUSG00000028041	11490	Adam15	1841.15	-0.536065	0.156731	3.42028	0.000625575	0.00809794
ENSMUSG00000038708	54214	Golga4	15023.8	0.32896	0.096212	-3.41911	0.00062826	0.00811506
ENSMUSG00000073131	67048	Vma21	209.907	-0.5974	0.174724	3.41911	0.00062827	0.00811506
ENSMUSG00000032786	11655	Alas1	3019.6	-0.412404	0.120668	3.41768	0.000631576	0.0081436
ENSMUSG00000073676	15528	Hspe1	554.587	-0.533095	0.156008	3.4171	0.000632927	0.00814687
ENSMUSG00000038244	320878	Mical2	3466.27	-0.512159	0.14988	3.41712	0.000632879	0.00814687
ENSMUSG00000040877	212198	Wdr25	106.22	0.673971	0.197473	-3.41298	0.000642574	0.00826054
ENSMUSG00000035936	214579	Aldh5a1	1071.81	0.418692	0.122681	-3.41285	0.00064287	0.00826054
ENSMUSG00000018379	110809	Srsf1	2849.48	-0.387123	0.113455	3.41212	0.000644607	0.00826796
ENSMUSG00000026812	64930	Tsc1	1697.22	0.379251	0.111171	-3.41143	0.00064623	0.00826796
ENSMUSG00000028226	17389	Mmp16	186.93	-0.618399	0.181223	3.41235	0.000644043	0.00826796
ENSMUSG00000024712	54391	Rfk	1010.23	-0.481475	0.141129	3.41159	0.000645846	0.00826796
ENSMUSG00000028584	242735	Lrrc38	70.7702	0.74953	0.219735	-3.41107	0.000647091	0.00827185
ENSMUSG00000031776	107566	Arl2bp	1482.53	-0.369915	0.10846	3.4106	0.000648195	0.00827884
ENSMUSG00000000776	67065	Polr3d	371.808	-0.446405	0.130912	3.40997	0.000649708	0.00828391
ENSMUSG00000034591	338365	Slc41a2	125.212	-0.686534	0.20135	3.40965	0.000650469	0.00828651
ENSMUSG00000032718	67729	Mansc1	173.099	0.536177	0.15729	-3.40885	0.000652376	0.00830367
ENSMUSG00000079426	68089	Arpc4	650.324	-0.410944	0.120574	3.40824	0.00065384	0.00831335
ENSMUSG00000093668	75507	Pou5f2	22.013	0.922086	0.27056	-3.40806	0.000654255	0.00831335
ENSMUSG00000052565	14957	Hist1h1d	146.138	0.663128	0.194646	-3.40685	0.000657176	0.00834333
ENSMUSG00000040528	380732	Gm885	13.7752	-0.96923	0.284577	3.40586	0.000659551	0.00836633
ENSMUSG00000051650	53625	B3gnt2	567.991	-0.449425	0.132042	3.40365	0.000664924	0.00841293
ENSMUSG00000078578	66105	Ube2d3	2758.35	-0.614027	0.180392	3.40385	0.000664439	0.00841293
ENSMUSG00000057604	30937	Lmcd1	510.627	-0.738948	0.217088	3.40391	0.000664293	0.00841293
ENSMUSG00000027848	99543	Olfml3	715.92	-0.474428	0.139487	3.40123	0.000670839	0.00848029
ENSMUSG00000018736	83431	Ndel1	2222.04	-0.335785	0.0987312	3.401	0.000671389	0.00848029
ENSMUSG00000076432	22630	Ywhaq	280.466	-0.604504	0.177791	3.40007	0.000673683	0.00850203
ENSMUSG00000048612	226101	Myof	1133.18	-0.429972	0.126502	3.39894	0.000676477	0.00852399
ENSMUSG00000070570	72961	Slc17a7	4713.18	0.46314	0.136262	-3.3989	0.000676571	0.00852399
ENSMUSG00000003378	14809	Grik5	239.074	0.570825	0.168022	-3.39732	0.000680487	0.00856606
ENSMUSG00000031467	52123	Agpat5	881.146	-0.490828	0.144486	3.39706	0.000681133	0.00856694
ENSMUSG00000053475	21930	Tnfaip6	81.9738	-0.768093	0.226149	3.3964	0.000682791	0.00857327
ENSMUSG00000036905	12260	C1qb	176.111	-0.568082	0.167259	3.39643	0.000682714	0.00857327
ENSMUSG00000026335	18484	Pam	298449	0.297618	0.0877117	-3.39314	0.000690971	0.00866134
ENSMUSG00000030996	11870	Art1	4317.93	0.378552	0.111591	-3.3923	0.000693077	0.00868041
ENSMUSG00000069833	66395	Ahnak	80741.6	-0.399126	0.117673	3.39183	0.000694286	0.00868823
ENSMUSG00000031274	12830	Col4a5	3829.9	-0.375206	0.110634	3.39142	0.00069531	0.00869371
ENSMUSG00000034303	245902	Ccdc15	133.549	0.598208	0.176509	-3.38911	0.000701202	0.00876001
ENSMUSG00000024091	30960	Vapa	1793.01	-0.398744	0.117682	3.38831	0.000703238	0.00877806
ENSMUSG00000028098	67845	Rnf115	496.57	-0.457349	0.135086	3.38562	0.000710174	0.0088572
ENSMUSG00000031295	110094	Phka2	877.207	0.386943	0.114422	-3.38171	0.000720363	0.00896921
ENSMUSG00000039497	212898	Dse	670.476	-0.417545	0.123466	3.38186	0.000719973	0.00896921
ENSMUSG00000030064	232288	Frmd4b	1165.32	-0.409158	0.121072	3.37947	0.000726259	0.00903505
ENSMUSG00000062127	80281	Cttnbp2nl	921.171	-0.572041	0.169378	3.37731	0.000731989	0.00908351
ENSMUSG00000028982	70556	Slc25a33	507.997	-0.546617	0.161848	3.37734	0.000731896	0.00908351
ENSMUSG00000058927	13063	Gm10053	874.038	-0.696465	0.206218	3.37732	0.000731971	0.00908351
ENSMUSG00000063694	13063	Cycs	874.038	-0.696465	0.206218	3.37732	0.000731971	0.00908351
ENSMUSG00000027082	21788	Tfpi	4614.08	-0.359582	0.106497	3.37645	0.000734284	0.00910439
ENSMUSG00000027175	320554	Tcp11l1	111.223	0.636883	0.188761	-3.37402	0.00074079	0.0091774
ENSMUSG00000033308	99586	Dpyd	483.954	0.444998	0.131974	-3.37187	0.000746596	0.00924162
ENSMUSG00000067081	208372	Asb18	175.093	0.55521	0.164694	-3.37117	0.000748487	0.0092496
ENSMUSG00000001763	232670	Tspan33	52.8196	0.758814	0.225087	-3.3712	0.00074842	0.0092496
ENSMUSG00000046794	244416	Ppp1r3b	877.661	0.554888	0.16471	-3.36888	0.000754746	0.0093192
ENSMUSG00000029672	27999	Fam3c	673.883	-0.396813	0.117852	3.36704	0.000759791	0.0093737
ENSMUSG00000028261	68493	Ndufaf4	1259.5	-0.479946	0.142588	3.36596	0.000762769	0.00940263
ENSMUSG00000029465	56378	Arpc3	1222.78	-0.43169	0.128288	3.36502	0.000765393	0.00942715
ENSMUSG00000020261	215335	Slc36a1	358.766	0.494777	0.14706	-3.36445	0.000766974	0.0094388
ENSMUSG00000002885	26364	Cd97	1639.01	-0.384391	0.114303	3.36292	0.000771237	0.00948341
ENSMUSG00000036292	207798	Gramd1c	102.359	0.743087	0.221013	-3.36218	0.00077329	0.00950079
ENSMUSG00000031668	13666	Eif2ak3	565.681	-0.40598	0.120768	3.36166	0.000774768	0.00951107
ENSMUSG00000044534	59289	Ccbp2	106.739	-0.692625	0.206066	3.36118	0.000776097	0.00951953
ENSMUSG00000020728	76380	Ccdc46	151.967	0.600399	0.178697	-3.35987	0.000779783	0.00955685
ENSMUSG00000031595	68797	Pdgfrl	108.089	-0.640904	0.190791	3.35919	0.000781721	0.0095727
ENSMUSG00000055067	69726	Smyd3	241.939	0.50569	0.150595	-3.35796	0.000785213	0.00960754
ENSMUSG00000006373	53328	Pgrmc1	897.074	-0.434184	0.129322	3.35738	0.000786835	0.00961155
ENSMUSG00000037989	75607	Wnk2	2698.42	0.565712	0.168492	-3.35749	0.000786524	0.00961155
ENSMUSG00000054320	270091	Lrrc36	37.202	0.847021	0.252349	-3.35655	0.000789218	0.00962483
ENSMUSG00000028369	64817	Svep1	2831.95	-0.588015	0.175179	3.35666	0.00078891	0.00962483
ENSMUSG00000066235	215494	C85492	447.516	0.458474	0.136609	-3.35612	0.000790452	0.00963197
ENSMUSG00000087651	69784	1500009L16Rik	29.4892	-0.912207	0.271888	3.35509	0.000793388	0.00965982
ENSMUSG00000047735	209086	Samd9l	925.288	-0.496648	0.14809	3.35368	0.000797433	0.00970112
ENSMUSG00000030245	66964	Golt1b	1100.47	-0.438452	0.130748	3.3534	0.000798251	0.00970312
ENSMUSG00000041057	72515	Wdr43	978.047	-0.394946	0.117822	3.35205	0.000802161	0.00974268
ENSMUSG00000032175	54721	Tyk2	768.021	0.474331	0.14156	-3.35074	0.000805973	0.00978099
ENSMUSG00000018659	103711	Pnpo	601.312	0.420164	0.125417	-3.35014	0.000807716	0.00979414
ENSMUSG00000019920	110829	Lims1	4450.76	-0.324284	0.0968312	3.34896	0.000811141	0.00982764
ENSMUSG00000025196	93721	Cpn1	20.2625	0.932688	0.278544	-3.34845	0.000812664	0.00983806
ENSMUSG00000047565	64833	Acot10	121.242	-0.618352	0.184721	3.34749	0.000815456	0.00984779
ENSMUSG00000020116	66249	Pno1	408.432	-0.436446	0.130373	3.34769	0.00081489	0.00984779
ENSMUSG00000031342	14758	Gpm6b	1541.52	-0.606888	0.181291	3.34759	0.000815173	0.00984779
ENSMUSG00000035725	19108	Prkx	614.366	-0.425433	0.127125	3.34657	0.000818175	0.0098726
ENSMUSG00000040152	21825	Thbs1	401.057	-0.949216	0.284066	3.34154	0.000833163	0.0100371
ENSMUSG00000024691	107373	Fam111a	363.626	-0.507816	0.151961	3.34175	0.000832523	0.0100371
ENSMUSG00000043300	26879	B3galnt1	130.215	-0.580893	0.173989	3.33868	0.000841776	0.0101081
ENSMUSG00000006435	18011	Neurl1a	88.695	0.694212	0.207889	-3.33934	0.000839765	0.0101081
ENSMUSG00000002881	17936	Nab1	1335.51	-0.374391	0.112127	3.33901	0.000840786	0.0101081
ENSMUSG00000025407	14632	Gli1	55.3439	0.79131	0.237006	-3.33877	0.000841489	0.0101081
ENSMUSG00000030447	20430	Cyfip1	2353.16	-0.409187	0.122581	3.33809	0.000843577	0.0101216
ENSMUSG00000044813	230126	Shb	485.718	-0.55738	0.167002	3.33756	0.00084516	0.0101324
ENSMUSG00000040841	20475	Six5	397.738	0.549536	0.164678	-3.33703	0.000846791	0.0101437
ENSMUSG00000050954	67911	Zfp169	191.078	0.577513	0.173105	-3.3362	0.00084932	0.0101658
ENSMUSG00000001847	19353	Rac1	3510.52	-0.391269	0.117387	3.33314	0.000858703	0.0102699
ENSMUSG00000032815	14087	Fanca	32.2169	0.83795	0.251514	-3.33162	0.000863427	0.0103181
ENSMUSG00000009739	19009	Pou6f1	397.158	0.458553	0.137656	-3.33115	0.00086487	0.010327
ENSMUSG00000045103	13405	Dmd	19235.6	0.400099	0.120125	-3.3307	0.00086629	0.0103356
ENSMUSG00000053279	11668	Aldh1a1	1186.03	-0.551661	0.165664	3.32999	0.000868477	0.0103534
ENSMUSG00000022661	17470	Cd200	917.815	-0.381234	0.114519	3.32899	0.000871603	0.0103823
ENSMUSG00000020601	217410	Trib2	630.195	-0.475183	0.142762	3.32849	0.000873168	0.0103927
ENSMUSG00000023886	64074	Smoc2	1172.02	-0.671779	0.201885	3.32753	0.000876181	0.0104202
ENSMUSG00000017167	53321	Cntnap1	146.341	0.558191	0.167767	-3.32719	0.000877278	0.0104249
ENSMUSG00000040387	212390	Klhl32	61.5598	0.718491	0.216191	-3.3234	0.00088927	0.0105589
ENSMUSG00000052681	215449	Rap1b	555.483	-0.57132	0.171957	3.32245	0.000892302	0.0105865
ENSMUSG00000027162	22343	Lin7c	1642.53	-0.455008	0.136962	3.32214	0.000893298	0.0105898
ENSMUSG00000022607	14083	Ptk2	1433.65	-0.379601	0.114314	3.32069	0.000897937	0.0106363
ENSMUSG00000022010	21807	Tsc22d1	14016.2	-0.378058	0.113966	3.31727	0.000909003	0.0107588
ENSMUSG00000040472	56187	Rabggta	388.59	0.450168	0.135789	-3.31521	0.000915744	0.01083
ENSMUSG00000079018	17067	Ly6c1	846.478	-0.433267	0.130738	3.31401	0.000919675	0.0108635
ENSMUSG00000022912	19128	Pros1	1319.96	-0.43159	0.130236	3.3139	0.000920045	0.0108635
ENSMUSG00000063952	268936	Brpf3	319.027	0.543277	0.163984	-3.31299	0.000923048	0.0108903
ENSMUSG00000022270	66270	Fam134b	5071.34	-0.545988	0.164828	3.31248	0.00092474	0.0109017
ENSMUSG00000019951	75089	Uhrf1bp1l	1333.19	-0.434313	0.131182	3.31078	0.000930379	0.0109334
ENSMUSG00000029622	434782	Arpc1b	122.234	-0.687951	0.207791	3.31078	0.000930364	0.0109334
ENSMUSG00000040761	56381	Spen	1509.25	0.509986	0.154025	-3.31106	0.000929439	0.0109334
ENSMUSG00000045039	269878	Megf8	3537.93	0.464477	0.140571	-3.30422	0.000952412	0.0111658
ENSMUSG00000020585	17775	Laptm4a	8321.77	-0.325152	0.098401	3.30436	0.000951941	0.0111658
ENSMUSG00000022211	268747	Lrrc16b	57.8528	0.756897	0.229125	-3.30343	0.000955098	0.0111885
ENSMUSG00000042050	217935	Wdr60	168.894	-0.605165	0.183308	3.30135	0.000962202	0.0112602
ENSMUSG00000036112	56307	Metap2	1489.09	-0.408072	0.123617	3.3011	0.000963073	0.0112602
ENSMUSG00000042390	229542	Gatad2b	346.253	0.616857	0.186871	-3.30098	0.000963491	0.0112602
ENSMUSG00000037685	11980	Atp8a1	2351.13	0.426512	0.129241	-3.30013	0.000966383	0.0112713
ENSMUSG00000001305	67223	Rrp15	166.131	-0.555778	0.168416	3.30004	0.00096672	0.0112713
ENSMUSG00000006522	16426	Itih3	37.6669	0.820031	0.24849	-3.30006	0.00096664	0.0112713
ENSMUSG00000033066	14457	Gas7	945.552	-0.501729	0.152075	3.29922	0.000969528	0.0112952
ENSMUSG00000036120	19727	Rfxank	550.601	-0.568715	0.172487	3.29714	0.000976748	0.011326
ENSMUSG00000064061	224170	Dzip3	654.778	-0.440953	0.133696	3.29819	0.000973109	0.011326
ENSMUSG00000037341	236727	Slc9a7	208.872	0.486831	0.147625	-3.29775	0.000974642	0.011326
ENSMUSG00000040254	108151	Sema3d	989.594	-0.626408	0.189949	3.29777	0.000974546	0.011326
ENSMUSG00000071342	380755	Gm889	435.215	0.46186	0.140061	-3.29756	0.000975294	0.011326
ENSMUSG00000041040	72750	Fam117b	748.162	-0.617547	0.187296	3.29717	0.000976651	0.011326
ENSMUSG00000074656	100040220	Eif2s2	357.428	-0.530816	0.16105	3.29597	0.000980813	0.0113643
ENSMUSG00000043323	381668	Fbrsl1	491.347	0.440369	0.13362	-3.29568	0.000981828	0.0113672
ENSMUSG00000026648	227525	Dclre1c	247.949	0.5524	0.167626	-3.29542	0.000982744	0.0113689
ENSMUSG00000027134	99010	Lpcat4	63.6742	-0.707847	0.21493	3.29339	0.000989886	0.0114426
ENSMUSG00000058571	23888	Gpc6	698.004	-0.457002	0.138817	3.29211	0.000994383	0.0114857
ENSMUSG00000028552	13858	Eps15	2574.33	-0.42521	0.129209	3.29087	0.000998789	0.0115186
ENSMUSG00000060063	11690	Alox5ap	77.9827	-0.659426	0.200377	3.29092	0.00099859	0.0115186
ENSMUSG00000048582	14611	Gja3	394.017	0.473285	0.143863	-3.28984	0.00100245	0.0115481
ENSMUSG00000022822	27416	Abcc5	1276.96	0.40984	0.124582	-3.28971	0.0010029	0.0115481
ENSMUSG00000021884	56794	Hacl1	326.589	0.484757	0.147377	-3.28922	0.00100464	0.0115503
ENSMUSG00000009905	70750	Kdsr	395.938	-0.494371	0.150333	3.28851	0.00100719	0.0115706
ENSMUSG00000024352	71242	Spata24	85.7618	0.638243	0.194275	-3.28525	0.00101892	0.0116864
ENSMUSG00000035245	101351	A130022J15Rik	638.782	-0.445608	0.13563	3.28548	0.0010181	0.0116864
ENSMUSG00000053985	243906	Zfp14	180.016	0.575299	0.175126	-3.28505	0.00101963	0.0116864
ENSMUSG00000021091	20716	Serpina3n	1845.18	0.885292	0.269509	-3.28484	0.00102041	0.0116864
ENSMUSG00000021823	22330	Vcl	5741.88	-0.402144	0.122453	3.28408	0.00102316	0.0117088
ENSMUSG00000049411	338363	6030446N20Rik	136.698	0.6004	0.182845	-3.28365	0.0010247	0.0117174
ENSMUSG00000017831	271457	Rab5a	1099.61	-0.383552	0.116828	3.28305	0.0010269	0.0117335
ENSMUSG00000033565	93686	Rbfox2	3865.63	0.320175	0.0975395	-3.28252	0.00102883	0.0117375
ENSMUSG00000067818	98932	Myl9	4435.46	-0.905836	0.275944	3.28268	0.00102824	0.0117375
ENSMUSG00000037788	232023	Vopp1	842.589	-0.370264	0.112807	3.28227	0.00102974	0.0117389
ENSMUSG00000030782	21804	Tgfb1i1	317.956	-0.553611	0.168757	3.28052	0.00103616	0.011803
ENSMUSG00000034981	231440	Parm1	1691.68	0.311381	0.0950089	-3.27739	0.00104773	0.0119256
ENSMUSG00000026377	67949	Mki67ip	446.548	-0.422517	0.128975	3.27596	0.00105304	0.0119769
ENSMUSG00000068798	109905	Rap1a	318.542	-0.453279	0.138437	3.27426	0.00105939	0.0120399
ENSMUSG00000000078	23849	Klf6	2529.38	-0.628959	0.192147	3.27333	0.0010629	0.0120635
ENSMUSG00000035372	72056	1810055G02Rik	211.644	-0.537716	0.164321	3.27234	0.00106661	0.0120943
ENSMUSG00000005667	17768	Mthfd2	131.811	0.596955	0.182485	-3.27125	0.00107073	0.0121317
ENSMUSG00000024331	13506	Dsc2	6489.4	0.383106	0.117189	-3.26913	0.00107878	0.0122136
ENSMUSG00000000278	74617	Scpep1	621.305	-0.380942	0.116555	3.26836	0.00108174	0.0122284
ENSMUSG00000058297	94214	Spock2	1914.52	0.55686	0.170378	-3.26838	0.00108163	0.0122284
ENSMUSG00000048960	109294	Prex2	3363.56	-0.365844	0.112025	3.26574	0.0010918	0.0123327
ENSMUSG00000000787	13205	Ddx3x	7389.86	-0.594061	0.181985	3.26434	0.0010972	0.0123844
ENSMUSG00000051223	66882	Bzw1	1581.42	-0.36277	0.111165	3.26336	0.001101	0.0124178
ENSMUSG00000040687	228355	Madd	336.884	0.461671	0.1415	-3.26269	0.0011036	0.0124377
ENSMUSG00000035863	18483	Palm	2071.77	-0.460475	0.141168	3.26189	0.00110673	0.0124635
ENSMUSG00000051579	66684	Tceal8	777.685	-0.513911	0.157572	3.26144	0.00110848	0.0124738
ENSMUSG00000033526	327655	Ppip5k1	1455.4	0.444672	0.136419	-3.2596	0.0011157	0.012536
ENSMUSG00000024360	225363	Etf1	3238.61	-0.41477	0.127298	3.25826	0.00112097	0.0125857
ENSMUSG00000046275	237858	Tusc5	66.5431	-0.773044	0.237351	3.25697	0.0011261	0.0125862
ENSMUSG00000007836	77134	Hnrnpa0	1232.33	-0.398198	0.122251	3.25721	0.00112513	0.0125862
ENSMUSG00000009291	108705	Pttg1ip	3308.93	-0.335544	0.102997	3.2578	0.00112279	0.0125862
ENSMUSG00000025982	81898	Sf3b1	7766.28	-0.416633	0.127896	3.25759	0.00112364	0.0125862
ENSMUSG00000030401	20167	Rtn2	2181.81	0.377113	0.115765	-3.25759	0.00112364	0.0125862
ENSMUSG00000021575	11624	Ahrr	23.9968	0.873024	0.268263	-3.25435	0.00113651	0.0126834
ENSMUSG00000015133	233328	Lrrk1	807.974	0.446605	0.137229	-3.25445	0.0011361	0.0126834
ENSMUSG00000030433	381836	Sbk2	3911.84	0.455416	0.140024	-3.25242	0.00114427	0.0127605
ENSMUSG00000033191	21846	Tie1	2115.47	-0.496635	0.15274	3.2515	0.00114798	0.0127923
ENSMUSG00000054920	71778	Klhl5	457.396	-0.490935	0.151016	3.25088	0.00115048	0.0128105
ENSMUSG00000057123	14613	Gja5	6138.95	0.461231	0.141938	-3.24953	0.00115597	0.012862
ENSMUSG00000022114	24064	Spry2	396.911	-0.451	0.138804	3.24918	0.00115739	0.0128681
ENSMUSG00000036585	14164	Fgf1	473.057	0.427151	0.131483	-3.24872	0.00115927	0.0128794
ENSMUSG00000030095	74122	Tmem43	739.473	-0.391263	0.120454	3.24822	0.00116128	0.0128922
ENSMUSG00000025316	53325	Banp	323.398	0.651647	0.200636	-3.2479	0.00116259	0.012897
ENSMUSG00000068299	75541	1700019G17Rik	118.444	0.655901	0.202155	-3.24454	0.0011764	0.0130405
ENSMUSG00000032475	17973	Nck1	746.766	-0.375036	0.115599	3.24428	0.0011775	0.0130429
ENSMUSG00000021811	108671	Dnajc9	304.086	0.46085	0.142092	-3.24333	0.00118143	0.0130767
ENSMUSG00000044934	238673	Zfp367	946.29	-0.38932	0.120111	3.24132	0.00118978	0.0131495
ENSMUSG00000052997	50995	Uba2	1285.52	-0.329278	0.101587	3.24134	0.00118971	0.0131495
ENSMUSG00000022773	106369	Ypel1	64.628	0.725773	0.223983	-3.24031	0.001194	0.0131864
ENSMUSG00000054321	72504	Taf4b	187.565	-0.495202	0.152875	3.23926	0.00119842	0.0132155
ENSMUSG00000000197	338370	Nalcn	141.298	-0.559851	0.172826	3.23938	0.00119788	0.0132155
ENSMUSG00000034109	73124	Golim4	1858.96	-0.33754	0.104263	3.23738	0.00120634	0.0132832
ENSMUSG00000039518	386463	Cdsn	27.7554	0.903473	0.279119	-3.23687	0.00120847	0.0132967
ENSMUSG00000046329	66972	Slc25a23	915.61	0.358552	0.110841	-3.23483	0.00121717	0.0133825
ENSMUSG00000028082	27059	Sh3d19	1146.96	-0.366973	0.113515	3.2328	0.00122583	0.0134678
ENSMUSG00000024462	54393	Gabbr1	304.525	0.463884	0.143552	-3.23146	0.00123159	0.0135211
ENSMUSG00000053007	231991	Creb5	138.454	-0.591316	0.183039	3.23055	0.00123553	0.0135544
ENSMUSG00000038366	16796	Lasp1	744.256	-0.466599	0.14452	3.22861	0.00124394	0.0136365
ENSMUSG00000058441	406218	Panx2	199.88	0.624424	0.193503	-3.22695	0.00125118	0.0137058
ENSMUSG00000032350	14629	Gclc	592.462	-0.626586	0.194194	3.22661	0.00125267	0.013712
ENSMUSG00000064080	14115	Fbln2	4884.29	-0.521018	0.161586	3.2244	0.00126236	0.0138078
ENSMUSG00000029710	13846	Ephb4	2678.01	-0.475202	0.147423	3.22339	0.00126685	0.0138328
ENSMUSG00000060802	12010	B2m	2916.33	-0.50857	0.157782	3.22325	0.00126744	0.0138328
ENSMUSG00000057337	53374	Chst3	56.6428	-0.795173	0.246778	3.22222	0.001272	0.0138725
ENSMUSG00000079144	319266	A130010J15Rik	178.209	0.604017	0.187588	-3.21991	0.0012823	0.0139745
ENSMUSG00000030876	59052	Mettl9	832.156	-0.368844	0.114559	3.21969	0.00128329	0.0139751
ENSMUSG00000007827	232339	Ankrd26	258.242	0.485314	0.150758	-3.21916	0.00128565	0.0139905
ENSMUSG00000018167	59045	Stard3	769.149	0.471501	0.146561	-3.2171	0.00129492	0.014081
ENSMUSG00000015766	13860	Eps8	788.373	-0.431859	0.134257	3.21665	0.00129698	0.0140931
ENSMUSG00000037355	71101	4933407H18Rik	462.228	0.448492	0.139462	-3.21587	0.0013005	0.014121
ENSMUSG00000008845	93671	Cd163	1141.87	-0.476137	0.148074	3.21554	0.001302	0.0141271
ENSMUSG00000022533	224088	Atp13a3	2200.15	-0.51184	0.159227	3.21453	0.00130657	0.0141663
ENSMUSG00000038416	69957	Cdc16	1514.02	-0.388127	0.120782	3.21346	0.00131147	0.014209
ENSMUSG00000026238	19231	Ptma	289.848	-0.436193	0.135779	3.21253	0.00131573	0.0142448
ENSMUSG00000006930	15114	Hap1	62.9722	0.683045	0.212801	-3.20978	0.00132835	0.0143673
ENSMUSG00000052040	50794	Klf13	2223.97	-0.486215	0.151485	3.20965	0.00132898	0.0143673
ENSMUSG00000052459	11964	Atp6v1a	1054.11	-0.374212	0.116604	3.20925	0.00133082	0.0143767
ENSMUSG00000036661	105841	Dennd3	372.327	-0.592207	0.184622	3.20767	0.00133815	0.014442
ENSMUSG00000020361	15525	Hspa4	6093.47	-0.355786	0.110922	3.20753	0.0013388	0.014442
ENSMUSG00000055775	17885	Myh8	32.062	-0.863975	0.269378	3.2073	0.00133989	0.0144432
ENSMUSG00000039781	12009	Azi1	221.144	0.513844	0.160307	-3.20537	0.0013489	0.0145256
ENSMUSG00000028719	66588	Cmpk1	457.344	-0.480795	0.150012	3.20503	0.00135046	0.0145256
ENSMUSG00000015217	15354	Hmgb3	121.788	-0.572503	0.178617	3.2052	0.00134967	0.0145256
ENSMUSG00000040690	107581	Col16a1	698.069	-0.489275	0.152699	3.20417	0.0013545	0.0145585
ENSMUSG00000003200	20405	Sh3gl1	519.41	-0.402123	0.125555	3.20276	0.00136117	0.0146196
ENSMUSG00000022949	209195	Clic6	33.5299	0.820492	0.256314	-3.20112	0.00136893	0.0146923
ENSMUSG00000021127	12192	Zfp36l1	938.888	0.454278	0.141932	-3.20067	0.00137106	0.0147045
ENSMUSG00000038970	231876	Lmtk2	2469.24	0.338664	0.105928	-3.19711	0.00138812	0.0148767
ENSMUSG00000047139	12484	Cd24a	201.785	-0.558464	0.174699	3.19673	0.00138997	0.0148858
ENSMUSG00000014905	27362	Dnajb9	674.142	-0.455338	0.142488	3.19562	0.00139528	0.0149268
ENSMUSG00000034312	232227	Iqsec1	3079.73	0.486765	0.152328	-3.19552	0.00139581	0.0149268
ENSMUSG00000061533	75216	4930534B04Rik	248.962	0.466799	0.146184	-3.19324	0.00140688	0.0150158
ENSMUSG00000025217	12234	Btrc	705.639	0.395277	0.123788	-3.19318	0.00140716	0.0150158
ENSMUSG00000028524	73094	Sgip1	54.416	0.78617	0.246195	-3.19328	0.00140667	0.0150158
ENSMUSG00000024098	65960	Twsg1	3156.26	-0.357889	0.112105	3.19244	0.00141074	0.0150432
ENSMUSG00000019278	13479	Dpep1	3265.67	-0.582779	0.182656	3.19058	0.00141987	0.0151297
ENSMUSG00000031503	12827	Col4a2	6289.76	-0.582099	0.182494	3.1897	0.00142422	0.0151652
ENSMUSG00000030224	20901	Strap	2281.83	-0.315813	0.0990409	3.18871	0.0014291	0.0152038
ENSMUSG00000024260	269003	Sap130	445.039	0.403302	0.126485	-3.18855	0.0014299	0.0152038
ENSMUSG00000029063	192185	Nadk	1214.17	-0.405081	0.127064	3.18801	0.00143256	0.0152213
ENSMUSG00000020078	30930	Vps26a	1958.27	-0.331921	0.104168	3.18639	0.00144058	0.0152955
ENSMUSG00000025287	56360	Acot9	470.825	-0.427252	0.134097	3.18613	0.00144189	0.0152985
ENSMUSG00000001017	66511	2500003M10Rik	1687.55	-0.31482	0.0988745	3.18404	0.00145236	0.0153986
ENSMUSG00000027660	20482	Skil	1590.26	-0.482994	0.151748	3.18287	0.00145824	0.0154499
ENSMUSG00000074802	237436	Gas2l3	206.462	-0.698457	0.219493	3.18213	0.00146196	0.0154749
ENSMUSG00000004085	65964	B230120H23Rik	14067.9	0.345569	0.108602	-3.18199	0.00146269	0.0154749
ENSMUSG00000005886	17978	Ncoa2	2499.58	0.383076	0.120432	-3.18086	0.00146837	0.015524
ENSMUSG00000078716	242409	Tmem8b	598.482	0.402494	0.126553	-3.18045	0.00147046	0.015535
ENSMUSG00000020847	380714	Rph3al	63.8284	0.674299	0.212074	-3.17955	0.00147502	0.0155721
ENSMUSG00000035506	171286	Slc12a8	43.7462	-0.831752	0.261631	3.17911	0.0014773	0.0155851
ENSMUSG00000022285	22631	Ywhaz	620.554	-0.450424	0.141721	3.17824	0.00148172	0.0156206
ENSMUSG00000079037	19122	Prnp	3051.47	-0.358199	0.112749	3.17696	0.00148828	0.0156786
ENSMUSG00000030465	234353	Psd3	14486.8	0.471114	0.148306	-3.17664	0.00148994	0.0156819
ENSMUSG00000022371	12818	Col14a1	4222.25	-0.618631	0.194753	3.17649	0.0014907	0.0156819
ENSMUSG00000003531	13353	Dgcr6	510.708	0.383544	0.12076	-3.17609	0.00149275	0.0156924
ENSMUSG00000049907	68939	Rasl11b	514.449	-0.54173	0.170637	3.17475	0.00149966	0.0157488
ENSMUSG00000034066	227377	Farp2	441.743	0.422042	0.13302	-3.17276	0.00150996	0.0158396
ENSMUSG00000054277	66251	Arfgap3	683.115	-0.351706	0.110923	3.17073	0.00152054	0.0159394
ENSMUSG00000019843	14360	Fyn	1137.68	-0.382561	0.120669	3.17034	0.00152262	0.0159499
ENSMUSG00000030030	71837	1700003E16Rik	36.0093	0.777308	0.245199	-3.17011	0.00152382	0.0159513
ENSMUSG00000030470	13009	Csrp3	29433.6	-0.426288	0.134532	3.16867	0.00153139	0.0159967
ENSMUSG00000041747	105372	Utp15	374.833	-0.41343	0.130459	3.16904	0.00152943	0.0159967
ENSMUSG00000027996	20319	Sfrp2	64.2657	-0.697763	0.220385	3.16611	0.00154491	0.016126
ENSMUSG00000024511	80718	Rab27b	121.477	-0.570687	0.18026	3.16592	0.00154594	0.016126
ENSMUSG00000033253	230676	Szt2	947.837	0.468206	0.147979	-3.16402	0.00155608	0.0162204
ENSMUSG00000020363	14584	Gfpt2	1059.53	-0.57999	0.183419	3.16211	0.00156632	0.0163157
ENSMUSG00000044461	219134	Shisa2	222.576	0.60558	0.19156	-3.16131	0.0015706	0.0163487
ENSMUSG00000018143	17135	Mafk	1403.19	-0.598188	0.189297	3.16006	0.00157738	0.0164078
ENSMUSG00000035284	320528	Vps13c	4458.3	0.45786	0.145214	-3.15301	0.00161595	0.0167973
ENSMUSG00000089989	14256	Flt3l	171.202	0.593718	0.188366	-3.15194	0.00162192	0.0168475
ENSMUSG00000041119	18585	Pde9a	220.337	0.507167	0.160922	-3.15162	0.00162365	0.0168538
ENSMUSG00000039578	232035	Fam190a	67.2566	0.660311	0.209564	-3.15088	0.00162781	0.0168851
ENSMUSG00000021245	217716	Mlh3	651.011	0.432961	0.137517	-3.14843	0.00164153	0.0170036
ENSMUSG00000043943	72560	Naalad2	733.262	-0.507836	0.161297	3.14845	0.0016414	0.0170036
ENSMUSG00000033618	71751	Map3k13	85.3967	0.621114	0.197299	-3.14808	0.00164348	0.017012
ENSMUSG00000010047	15587	Hyal2	515.18	-0.530355	0.168519	3.14716	0.00164866	0.0170419
ENSMUSG00000029415	231452	Sdad1	511.041	-0.40628	0.129088	3.14731	0.0016478	0.0170419
ENSMUSG00000036218	239618	Pdzrn4	352.759	0.52412	0.166555	-3.14683	0.0016505	0.0170491
ENSMUSG00000026315	20725	Serpinb8	186.432	-0.521535	0.165801	3.14554	0.00165781	0.0171126
ENSMUSG00000023036	93717	Pcdhga9	152.411	0.588529	0.187177	-3.14424	0.00166521	0.0171771
ENSMUSG00000074457	67860	S100a16	862.556	-0.458189	0.145832	3.1419	0.00167857	0.0172909
ENSMUSG00000047067	67446	Dusp28	237.242	0.478776	0.1525	-3.13951	0.00169231	0.0174203
ENSMUSG00000020263	216190	Appl2	2301.55	0.3707	0.118092	-3.13908	0.00169482	0.0174341
ENSMUSG00000054509	328417	Parp4	1127.04	0.433037	0.137989	-3.1382	0.00169989	0.0174742
ENSMUSG00000049252	94217	Lrp1b	90.0514	0.645187	0.205713	-3.13635	0.00171064	0.0175725
ENSMUSG00000028465	21894	Tln1	10747.3	-0.365024	0.116419	3.13544	0.00171597	0.0175995
ENSMUSG00000021072	72736	Tmx1	572.734	-0.476135	0.15185	3.13556	0.00171526	0.0175995
ENSMUSG00000030562	50490	Nox4	99.002	-0.632318	0.201677	3.13529	0.00171682	0.0175995
ENSMUSG00000031197	22327	Vbp1	1116.61	-0.47351	0.151099	3.13377	0.00172574	0.0176422
ENSMUSG00000023017	11419	Accn2	151.011	0.578551	0.184585	-3.13433	0.00172247	0.0176422
ENSMUSG00000029860	22793	Zyx	1373.42	-0.498579	0.15909	3.13393	0.00172481	0.0176422
ENSMUSG00000029171	66681	Pgm1	159.711	-0.574941	0.183527	3.13273	0.00173188	0.0176928
ENSMUSG00000020869	98238	Lrrc59	1427.6	-0.380949	0.121716	3.12982	0.00174911	0.0178565
ENSMUSG00000031530	319520	Dusp4	209.146	-0.662759	0.211785	3.1294	0.00175163	0.01787
ENSMUSG00000070871	227210	Ccnyl1	186.148	-0.540805	0.172873	3.12834	0.00175797	0.0179223
ENSMUSG00000036323	66661	Srp72	1647.69	-0.371049	0.118674	3.12662	0.00176826	0.0180149
ENSMUSG00000029022	28010	Miip	274.824	0.468605	0.149906	-3.12599	0.0017721	0.0180416
ENSMUSG00000032842	224814	Abcc10	260.406	0.531243	0.170064	-3.12379	0.00178538	0.0181644
ENSMUSG00000074874	13025	Ctla2b	174.474	-0.754238	0.241629	3.12148	0.00179945	0.018295
ENSMUSG00000002329	67881	Mdp1	873.953	0.512594	0.164266	-3.12051	0.00180539	0.0183429
ENSMUSG00000037363	270035	Letm2	104.949	0.630684	0.202157	-3.11977	0.00180992	0.0183763
ENSMUSG00000031885	12400	Cbfb	746.15	-0.400747	0.128578	3.11677	0.00182844	0.0185517
ENSMUSG00000041372	330406	B4galnt3	12.5484	-0.885637	0.284262	3.11557	0.00183591	0.0185894
ENSMUSG00000030983	66165	Bccip	781.722	-0.356	0.114263	3.11563	0.00183554	0.0185894
ENSMUSG00000021244	56531	Ylpm1	1114.92	0.391548	0.125661	-3.11591	0.00183379	0.0185894
ENSMUSG00000024436	66973	Mrps18b	108.501	-0.558348	0.179228	3.11529	0.00183766	0.0185945
ENSMUSG00000038319	16511	Kcnh2	3188.35	0.48111	0.154488	-3.11422	0.00184434	0.0186493
ENSMUSG00000055407	17760	Mtap6	76.1741	-0.677207	0.21757	3.11259	0.00185455	0.0187398
ENSMUSG00000043998	217664	Mgat2	788.262	-0.362553	0.116495	3.11218	0.00185709	0.0187527
ENSMUSG00000040282	399568	BC052040	47.5211	0.720937	0.231688	-3.11167	0.00186032	0.0187726
ENSMUSG00000006498	19205	Ptbp1	700.82	-0.426175	0.136981	3.11119	0.00186334	0.0187837
ENSMUSG00000021464	26564	Ror2	279.197	0.581449	0.186895	-3.11109	0.00186395	0.0187837
ENSMUSG00000037211	24063	Spry1	450.557	-0.482201	0.155025	3.11047	0.0018679	0.0188107
ENSMUSG00000028496	70122	Mllt3	634.318	0.388482	0.124922	-3.10979	0.00187223	0.0188415
ENSMUSG00000066842	545370	Hmcn1	6494.76	-0.352037	0.113211	3.10955	0.0018737	0.0188436
ENSMUSG00000031701	56445	Dnaja2	6218.62	-0.382033	0.122908	3.10828	0.00188177	0.0189119
ENSMUSG00000029512	22241	Ulk1	1576.92	0.392747	0.126518	-3.10427	0.00190746	0.0191572
ENSMUSG00000049969	71801	Plekhf2	342.461	-0.474747	0.152945	3.10404	0.00190898	0.0191594
ENSMUSG00000070284	331026	Gmppb	255.648	-0.455574	0.146868	3.10192	0.00192269	0.019284
ENSMUSG00000044162	414084	Tnip3	66.0388	0.758758	0.244686	-3.10095	0.00192904	0.0193346
ENSMUSG00000031983	69551	2310022B05Rik	1355.28	-0.428076	0.138067	3.1005	0.00193196	0.0193509
ENSMUSG00000052374	11472	Actn2	33388.4	0.37477	0.120965	-3.09817	0.00194719	0.0194903
ENSMUSG00000036356	234356	Csgalnact1	589.641	-0.459952	0.148493	3.09747	0.00195181	0.0195233
ENSMUSG00000018846	211347	Pank3	1597.21	-0.465634	0.150405	3.09587	0.00196236	0.0196025
ENSMUSG00000026500	66359	Fam36a	764.262	-0.465578	0.15038	3.09602	0.0019614	0.0196025
ENSMUSG00000053965	242202	Pde5a	457.896	-0.481438	0.155534	3.09539	0.00196557	0.0196214
ENSMUSG00000039234	69608	Sec24d	1829.86	-0.368052	0.119017	3.09244	0.00198515	0.0197318
ENSMUSG00000035202	102436	Lars2	6743.26	0.842417	0.272357	-3.09306	0.00198107	0.0197318
ENSMUSG00000026305	16978	Lrrfip1	1818.09	-0.340658	0.110162	3.09233	0.00198589	0.0197318
ENSMUSG00000048728	237758	Zfp454	40.7797	0.765104	0.24742	-3.09233	0.00198593	0.0197318
ENSMUSG00000031176	67117	Dynlt3	1350.17	-0.376332	0.121657	3.0934	0.0019788	0.0197318
ENSMUSG00000028945	19744	Rheb	1574.95	-0.333993	0.108001	3.09249	0.00198486	0.0197318
ENSMUSG00000020388	30794	Pdlim4	842.228	0.52374	0.16947	-3.09047	0.00199842	0.0198426
ENSMUSG00000021408	19766	Ripk1	498.032	-0.43119	0.139537	3.09014	0.00200059	0.0198509
ENSMUSG00000044949	327900	Ubtd2	408.824	-0.407289	0.131853	3.08896	0.00200859	0.0199169
ENSMUSG00000016510	76366	Mtif3	336.344	0.424929	0.137574	-3.08873	0.00201016	0.0199192
ENSMUSG00000042251	212933	Pm20d1	289.888	0.503338	0.163094	-3.08618	0.00202746	0.0200772
ENSMUSG00000038604	75687	Fam65a	771.954	0.587802	0.190597	-3.08401	0.0020423	0.0201923
ENSMUSG00000045954	20324	Sdpr	6805.59	-0.412815	0.133862	3.08389	0.00204314	0.0201923
ENSMUSG00000026589	89867	Sec16b	224.511	0.540563	0.175286	-3.08389	0.00204315	0.0201923
ENSMUSG00000058624	14544	Gda	1547.97	-0.452363	0.14671	3.08339	0.00204657	0.0202126
ENSMUSG00000055313	319207	Pgbd1	97.5899	0.649061	0.210551	-3.08268	0.00205144	0.0202314
ENSMUSG00000008305	21885	Tle1	628.711	-0.406869	0.131975	3.08291	0.00204986	0.0202314
ENSMUSG00000043831	75099	Lysmd4	592.594	0.468599	0.152018	-3.08252	0.00205256	0.0202314
ENSMUSG00000063568	231986	Jazf1	123.947	-0.591106	0.19178	3.08221	0.00205468	0.0202389
ENSMUSG00000034055	18679	Phka1	2087.11	0.352003	0.114217	-3.08189	0.00205692	0.0202475
ENSMUSG00000034949	103406	Zfr2	159.753	0.52932	0.171822	-3.08063	0.00206567	0.0203201
ENSMUSG00000072662	545893	Gm5887	20.9029	0.833761	0.270768	-3.07924	0.00207527	0.0204011
ENSMUSG00000000901	17385	Mmp11	163.671	0.638412	0.207366	-3.07867	0.00207926	0.0204268
ENSMUSG00000058756	21833	Thra	1684.99	0.335422	0.108958	-3.07845	0.00208082	0.0204286
ENSMUSG00000029655	381695	N4bp2l2	1851.73	-0.431373	0.140217	3.07646	0.00209476	0.0205519
ENSMUSG00000022791	51789	Tnk2	889.525	0.474484	0.154312	-3.07483	0.00210621	0.0205929
ENSMUSG00000002771	14814	Grin2d	30.4417	0.804137	0.261505	-3.07503	0.00210483	0.0205929
ENSMUSG00000007850	59013	Hnrnph1	2130.89	-0.398109	0.129465	3.07504	0.00210477	0.0205929
ENSMUSG00000046186	235505	Cd109	177.44	-0.529571	0.172236	3.07468	0.00210726	0.0205929
ENSMUSG00000035392	227801	Dennd1a	688.406	0.357464	0.116258	-3.07475	0.00210676	0.0205929
ENSMUSG00000017466	21858	Timp2	5518.08	-0.411189	0.133721	3.07497	0.00210523	0.0205929
ENSMUSG00000028150	19885	Rorc	840.818	0.410503	0.133555	-3.07367	0.00211446	0.0206362
ENSMUSG00000024679	68774	Ms4a6d	110.076	-0.699898	0.227706	3.07368	0.00211433	0.0206362
ENSMUSG00000033436	67416	Armcx2	586.035	-0.392379	0.127671	3.07335	0.00211668	0.0206442
ENSMUSG00000041351	110351	Rap1gap	338.268	0.686475	0.223447	-3.0722	0.00212484	0.0207102
ENSMUSG00000024781	16889	Lipa	1367.54	-0.389291	0.126745	3.07144	0.00213029	0.0207246
ENSMUSG00000016024	16803	Lbp	213.928	-0.532676	0.173409	3.07179	0.00212776	0.0207246
ENSMUSG00000006850	71983	Tmco6	140.337	0.612108	0.199292	-3.07141	0.0021305	0.0207246
ENSMUSG00000056515	106572	Rab31	743.425	-0.405734	0.132137	3.07055	0.00213664	0.0207707
ENSMUSG00000005732	19385	Ranbp1	397.559	-0.511063	0.166529	3.06892	0.00214837	0.0208711
ENSMUSG00000003228	14773	Grk5	644.71	0.410954	0.133966	-3.06761	0.0021578	0.020949
ENSMUSG00000046034	432940	Fam105b	479.74	-0.422695	0.13784	3.06657	0.00216531	0.0209726
ENSMUSG00000042042	78752	Csgalnact2	1268.21	-0.363467	0.118529	3.06649	0.00216588	0.0209726
ENSMUSG00000070873	232801	Lilra5	56.513	-0.687404	0.22416	3.06657	0.00216528	0.0209726
ENSMUSG00000039414	320473	Heatr5b	1167.93	0.329731	0.107527	-3.06651	0.00216572	0.0209726
ENSMUSG00000030727	70314	Rabep2	261.912	0.504953	0.164737	-3.06521	0.00217521	0.0210492
ENSMUSG00000042363	216551	1110067D22Rik	1350.21	-0.405201	0.132228	3.06442	0.00218091	0.0210907
ENSMUSG00000037493	56506	Cib2	106.049	0.688372	0.224683	-3.06376	0.00218578	0.021124
ENSMUSG00000031666	19651	Rbl2	1872.2	0.378967	0.123724	-3.06299	0.00219136	0.0211641
ENSMUSG00000020019	57764	Ntn4	487.675	-0.43223	0.141143	3.06237	0.00219593	0.0211945
ENSMUSG00000022957	16443	Itsn1	2160.72	0.312527	0.102076	-3.06171	0.00220073	0.021227
ENSMUSG00000030428	57776	Ttyh1	68.2123	-0.711813	0.232554	3.06085	0.0022071	0.0212608
ENSMUSG00000020782	217325	Llgl2	392.679	0.562722	0.183839	-3.06095	0.00220635	0.0212608
ENSMUSG00000061894	269585	Zscan20	226.598	0.479789	0.156765	-3.06057	0.0022092	0.0212673
ENSMUSG00000009378	240638	Slc16a12	284.437	-0.531248	0.173654	3.05923	0.00221906	0.0213484
ENSMUSG00000028479	50798	Gne	1259.02	0.328627	0.107433	-3.0589	0.00222154	0.0213584
ENSMUSG00000063488	382118	Zfp167	201.492	0.500984	0.163794	-3.05862	0.00222359	0.0213643
ENSMUSG00000015714	76893	Lass2	1165.33	-0.342664	0.112129	3.05598	0.00224328	0.0215395
ENSMUSG00000029578	74781	Wipi2	1562.28	0.301861	0.0987986	-3.05531	0.00224826	0.0215734
ENSMUSG00000025255	80892	Zfhx4	169.923	0.610484	0.19987	-3.0544	0.00225512	0.0216252
ENSMUSG00000058318	192285	Phf21a	688.622	0.365938	0.119852	-3.05325	0.00226376	0.0216775
ENSMUSG00000026628	11910	Atf3	557.523	-0.857343	0.280821	3.05299	0.00226572	0.0216775
ENSMUSG00000020652	52504	Cenpo	113.768	0.562544	0.184257	-3.05304	0.00226535	0.0216775
ENSMUSG00000036655	71693	Colec11	167.19	-0.528812	0.173216	3.0529	0.0022664	0.0216775
ENSMUSG00000069515	17110	Lyz1	43.9763	-0.758007	0.248367	3.05197	0.00227347	0.0217311
ENSMUSG00000024287	225160	Thoc1	454.807	-0.418517	0.137141	3.05172	0.00227535	0.0217351
ENSMUSG00000038217	380712	Tlcd2	113.888	-0.568129	0.186227	3.05074	0.00228279	0.0217922
ENSMUSG00000037465	21847	Klf10	871.881	-0.50778	0.166476	3.05016	0.00228718	0.02182
ENSMUSG00000030302	11941	Atp2b2	475.805	0.647384	0.212277	-3.04972	0.00229056	0.0218383
ENSMUSG00000001508	20391	Sgca	2230.29	0.363135	0.1191	-3.04899	0.00229615	0.0218718
ENSMUSG00000021427	107513	Ssr1	1864.51	-0.333011	0.109224	3.04887	0.00229703	0.0218718
ENSMUSG00000042903	54601	Foxo4	1374.38	0.43714	0.143438	-3.0476	0.00230677	0.0219505
ENSMUSG00000004451	64143	Ralb	587.526	-0.392673	0.128869	3.04707	0.0023108	0.0219607
ENSMUSG00000037703	241638	Prosapip1	402.589	0.440281	0.144488	-3.04719	0.00230991	0.0219607
ENSMUSG00000042826	14166	Fgf11	61.1749	0.67755	0.222388	-3.0467	0.00231367	0.0219739
ENSMUSG00000045087	94226	S1pr5	16.5696	0.858599	0.281982	-3.04487	0.00232779	0.0220939
ENSMUSG00000043029	246788	Trpv3	11.9427	0.864242	0.283861	-3.0446	0.00232993	0.0221002
ENSMUSG00000017776	12928	Crk	3462.26	-0.321829	0.10572	3.04416	0.00233329	0.0221179
ENSMUSG00000062785	16504	Kcnc3	32.4858	0.818721	0.268982	-3.04377	0.00233634	0.0221326
ENSMUSG00000038068	218215	Rnf144b	840.446	-0.41189	0.135346	3.04325	0.00234041	0.022157
ENSMUSG00000041308	20650	Sntb2	1174.86	-0.426444	0.140139	3.04301	0.00234224	0.0221603
ENSMUSG00000060373	15381	Hnrnpc	1571.97	-0.388495	0.127767	3.04065	0.00236067	0.0223205
ENSMUSG00000025283	20229	Sat1	524.286	-0.531688	0.174905	3.03987	0.00236683	0.0223502
ENSMUSG00000001946	69524	Esam	1194.34	-0.447719	0.147279	3.03994	0.00236623	0.0223502
ENSMUSG00000059901	237360	Adamts14	33.4714	-0.814483	0.267962	3.03954	0.00236939	0.0223601
ENSMUSG00000031833	546071	Mast3	245.081	0.47155	0.155154	-3.03924	0.00237174	0.0223681
ENSMUSG00000023036	93708	Pcdhga9	47.6959	0.73375	0.241567	-3.03746	0.00238583	0.0224725
ENSMUSG00000066306	101706	Numa1	5115.15	0.331256	0.109124	-3.03558	0.00240077	0.022556
ENSMUSG00000049553	20019	Polr1a	1889.16	0.282171	0.092951	-3.0357	0.00239981	0.022556
ENSMUSG00000029438	77045	Bcl7a	287.405	0.454097	0.149629	-3.03483	0.00240673	0.0225977
ENSMUSG00000028836	230810	Slc30a2	32.4744	0.763937	0.251806	-3.03383	0.00241468	0.02265
ENSMUSG00000049439	77951	Cyp20a1	445.884	-0.486704	0.16043	3.03375	0.00241535	0.02265
ENSMUSG00000034349	70099	Smc4	1061.53	-0.481666	0.158809	3.03298	0.0024215	0.0226665
ENSMUSG00000071722	270624	Spin4	92.2806	-0.613468	0.202288	3.03264	0.00242424	0.0226665
ENSMUSG00000045377	67020	Tmem88	183.755	-0.553253	0.182437	3.03258	0.00242473	0.0226665
ENSMUSG00000039831	214137	Arhgap29	2888.29	-0.422352	0.13925	3.03306	0.0024209	0.0226665
ENSMUSG00000020898	68964	1500010J02Rik	597.313	0.346835	0.114362	-3.03278	0.00242312	0.0226665
ENSMUSG00000023191	14789	Leprel2	576.028	-0.445864	0.147089	3.03125	0.00243545	0.0227523
ENSMUSG00000020993	78232	Trappc6b	552.825	-0.365066	0.120527	3.0289	0.00245443	0.0229152
ENSMUSG00000027624	13821	Epb4.1l1	700.337	0.350437	0.115737	-3.02787	0.00246286	0.0229362
ENSMUSG00000006369	14114	Fbln1	8428.55	-0.405534	0.133922	3.02814	0.00246062	0.0229362
ENSMUSG00000058248	16510	Kcnh1	75.388	-0.629834	0.208005	3.02797	0.00246199	0.0229362
ENSMUSG00000024642	21888	Tle4	402.629	-0.461814	0.152509	3.0281	0.00246096	0.0229362
ENSMUSG00000023068	52014	Nus1	1252.08	-0.500693	0.165446	3.02632	0.00247546	0.0230392
ENSMUSG00000029778	11517	Adcyap1r1	390.427	0.433586	0.143294	-3.02585	0.00247935	0.0230609
ENSMUSG00000028266	16911	Lmo4	629.063	-0.354938	0.117343	3.02479	0.00248804	0.0231272
ENSMUSG00000044258	13024	Ctla2a	1725.64	-0.847354	0.280218	3.02391	0.00249532	0.0231801
ENSMUSG00000022507	69053	1810013L24Rik	1977.76	-0.386221	0.12773	3.02372	0.00249684	0.0231801
ENSMUSG00000040591	228356	1110051M20Rik	434.19	0.378017	0.125086	-3.02206	0.00251064	0.0232412
ENSMUSG00000051242	93880	Pcdhb9	25.0631	-0.841679	0.278467	3.02255	0.00250659	0.0232412
ENSMUSG00000039458	268783	Mtmr12	575.526	-0.376047	0.124428	3.02222	0.0025093	0.0232412
ENSMUSG00000038797	22691	Zscan2	102.587	0.557535	0.184476	-3.02227	0.00250887	0.0232412
ENSMUSG00000035759	71769	Bbs10	138.469	0.595625	0.19711	-3.02179	0.00251285	0.0232415
ENSMUSG00000031934	55991	Panx1	80.9323	-0.622464	0.206063	3.02075	0.00252148	0.0232923
ENSMUSG00000020689	16416	Itgb3	354.431	-0.672035	0.222471	3.02078	0.00252126	0.0232923
ENSMUSG00000030259	71323	Rassf8	921.735	0.365573	0.121044	-3.02017	0.00252633	0.0233081
ENSMUSG00000043505	317757	Gimap5	70.8261	-0.706853	0.234034	3.0203	0.0025252	0.0233081
ENSMUSG00000032562	14678	Gnai2	2732.94	-0.35323	0.117045	3.0179	0.00254535	0.0234545
ENSMUSG00000040550	72201	Otud6b	924.32	-0.351484	0.116537	3.01608	0.0025607	0.0235666
ENSMUSG00000025145	217366	Lrrc45	296.046	0.418245	0.138705	-3.01536	0.00256677	0.0236064
ENSMUSG00000036594	14960	H2-Aa	463.125	-0.534454	0.177254	3.01519	0.0025682	0.0236064
ENSMUSG00000085795	353310	Zfp703	333.255	0.637023	0.211324	-3.01444	0.00257453	0.02365
ENSMUSG00000021108	18755	Prkch	696.732	-0.443277	0.147079	3.01387	0.00257937	0.0236798
ENSMUSG00000006920	14055	Ezh1	1607.2	0.312574	0.103742	-3.01298	0.00258697	0.0237349
ENSMUSG00000001441	19155	Npepps	2093.41	0.437281	0.145144	-3.01275	0.00258896	0.0237385
ENSMUSG00000028854	20544	Slc9a1	459.784	0.448471	0.148884	-3.01223	0.00259339	0.0237592
ENSMUSG00000056216	12611	Cebpg	1065.96	-0.401951	0.133445	3.01211	0.00259442	0.0237592
ENSMUSG00000001506	12842	Col1a1	4986.68	-0.783429	0.260253	3.01026	0.00261021	0.0238892
ENSMUSG00000019852	215821	D10Bwg1379e	133.144	-0.540541	0.179622	3.00932	0.00261833	0.023934
ENSMUSG00000003476	12922	Crhr2	570.623	0.38216	0.126987	-3.00945	0.00261724	0.023934
ENSMUSG00000062210	106869	Tnfaip8	435.016	-0.438347	0.145675	3.00907	0.0026205	0.023939
ENSMUSG00000031239	16431	Itm2a	532.307	-0.636064	0.211427	3.00843	0.00262605	0.023975
ENSMUSG00000028035	67035	Dnajb4	4030.29	-0.46	0.15297	3.00713	0.00263729	0.0240587
ENSMUSG00000032633	216805	Flcn	1372.24	0.297637	0.0989816	-3.00699	0.00263846	0.0240587
ENSMUSG00000071379	53602	Hpcal1	171.63	-0.513634	0.170841	3.0065	0.00264271	0.0240827
ENSMUSG00000026712	17533	Mrc1	3264.22	-0.381305	0.12684	3.00619	0.00264544	0.0240928
ENSMUSG00000025738	214931	Fbxl16	147.773	0.540225	0.179819	-3.00428	0.0026621	0.0242297
ENSMUSG00000030110	19713	Ret	105.424	-0.632838	0.210724	3.00316	0.00267192	0.0243042
ENSMUSG00000055553	75620	2810422J05Rik	953.648	0.351956	0.117236	-3.00212	0.0026811	0.0243429
ENSMUSG00000039270	230316	Megf9	377.238	-0.525043	0.174889	3.00215	0.00268077	0.0243429
ENSMUSG00000027803	97064	Wwtr1	3848.91	-0.325653	0.108471	3.00221	0.00268023	0.0243429
ENSMUSG00000022179	74359	4931414P19Rik	118.416	0.597904	0.199187	-3.00172	0.00268458	0.0243596
ENSMUSG00000039842	244329	Mcph1	341.953	0.443176	0.147691	-3.0007	0.00269359	0.0244265
ENSMUSG00000033446	67168	Lpar6	279.11	-0.460946	0.153654	2.99989	0.00270076	0.0244765
ENSMUSG00000028803	74552	Nipal3	1040.62	0.324902	0.10832	-2.99948	0.00270443	0.0244949
ENSMUSG00000028017	13645	Egf	656.1	0.329837	0.110004	-2.99841	0.00271393	0.0245659
ENSMUSG00000020734	14813	Grin2c	346.942	-0.46345	0.154721	2.99538	0.00274099	0.0247957
ENSMUSG00000070639	433926	Lrrc8b	200.195	-0.543195	0.181355	2.9952	0.00274265	0.0247957
ENSMUSG00000026484	19821	Rnf2	596.59	-0.41061	0.137148	2.99392	0.00275416	0.0248695
ENSMUSG00000030000	11519	Add2	90.0881	-0.768781	0.256766	2.99409	0.00275268	0.0248695
ENSMUSG00000056313	69068	1810011O10Rik	607.222	-0.535304	0.178844	2.99314	0.00276126	0.0249185
ENSMUSG00000004843	68942	Chmp2b	866.733	-0.397287	0.132747	2.9928	0.00276427	0.0249305
ENSMUSG00000023008	22379	Fmnl3	772.359	-0.395766	0.132256	2.99243	0.00276768	0.024946
ENSMUSG00000000957	17387	Mmp14	530.656	-0.517227	0.172891	2.99164	0.0027748	0.0249951
ENSMUSG00000051747	22138	Ttn	1.96828e+06	0.362889	0.121318	-2.99122	0.00277869	0.0249998
ENSMUSG00000032349	68801	Elovl5	1187.2	-0.367526	0.122907	2.99027	0.00278734	0.0250624
ENSMUSG00000047126	67300	Cltc	12867.5	-0.37271	0.124649	2.99007	0.00278913	0.0250634
ENSMUSG00000001542	192657	Ell2	372.786	-0.566681	0.18958	2.98914	0.00279765	0.0251013
ENSMUSG00000079477	19349	Rab7	414.162	-0.404172	0.135217	2.98905	0.00279842	0.0251013
ENSMUSG00000079614	72124	Seh1l	704.295	-0.334254	0.111856	2.98826	0.00280574	0.0251518
ENSMUSG00000027006	66861	Dnajc10	3617.6	-0.313371	0.104877	2.98799	0.00280821	0.0251587
ENSMUSG00000037259	241688	6330439K17Rik	73.1473	0.665992	0.22305	-2.98585	0.00282792	0.0253184
ENSMUSG00000046387	93888	Pcdhb17	189.368	-0.565626	0.189446	2.98568	0.00282944	0.0253184
ENSMUSG00000019899	16773	Lama2	14134.8	-0.329499	0.110383	2.98505	0.00283528	0.0253554
ENSMUSG00000067889	20743	Spnb3	49.4754	0.722431	0.242074	-2.98434	0.00284186	0.025399
ENSMUSG00000005672	16590	Kit	84.8731	-0.617444	0.206908	2.98415	0.00284364	0.0253995
ENSMUSG00000037251	74653	4930444A02Rik	344.824	0.420338	0.140941	-2.98237	0.0028603	0.025533
ENSMUSG00000029638	170772	Glcci1	339.669	0.472204	0.158362	-2.9818	0.00286561	0.025565
ENSMUSG00000015165	15388	Hnrnpl	2679.5	-0.359515	0.120638	2.9801	0.00288153	0.0256917
ENSMUSG00000020743	69674	Mif4gd	509.524	0.364154	0.12222	-2.97949	0.0028873	0.0257277
ENSMUSG00000027956	70652	Tmem144	1122.95	-0.417956	0.140322	2.97856	0.00289608	0.0257904
ENSMUSG00000051977	213389	Prdm9	60.9132	0.634578	0.213133	-2.97738	0.00290724	0.0258743
ENSMUSG00000072647	280668	Adam1a	82.9876	0.593377	0.199323	-2.97696	0.00291123	0.0258943
ENSMUSG00000051984	240667	Sec31b	646.632	0.403435	0.135539	-2.97653	0.0029153	0.0259149
ENSMUSG00000066687	235320	Zbtb16	3738.23	-0.575547	0.193389	2.97611	0.00291927	0.0259347
ENSMUSG00000015176	70769	Nolc1	730.639	-0.339841	0.114204	2.97575	0.00292274	0.02595
ENSMUSG00000027424	74528	8430406I07Rik	320.33	0.391043	0.131433	-2.97522	0.00292779	0.0259794
ENSMUSG00000026923	18128	Notch1	2911.32	-0.473334	0.15914	2.97432	0.00293642	0.0260274
ENSMUSG00000049090	225791	Zadh2	1495.84	0.378066	0.127112	-2.97429	0.00293672	0.0260274
ENSMUSG00000005220	53419	Corin	16962.9	0.359337	0.120837	-2.97374	0.00294194	0.0260582
ENSMUSG00000034157	217732	2310044G17Rik	2468.86	-0.339496	0.114196	2.97291	0.00294987	0.0260943
ENSMUSG00000039988	433667	Ankrd13c	783.55	-0.418652	0.140829	2.97277	0.00295129	0.0260943
ENSMUSG00000020368	12330	Canx	12537.4	-0.29198	0.0982108	2.97299	0.00294916	0.0260943
ENSMUSG00000035799	22160	Twist1	54.6318	-0.685198	0.230531	2.97226	0.00295619	0.0261221
ENSMUSG00000036555	74239	Iqce	222.878	0.424744	0.142922	-2.97187	0.00295994	0.0261397
ENSMUSG00000025027	170750	Xpnpep1	1246.04	-0.395242	0.133007	2.9716	0.00296256	0.0261473
ENSMUSG00000070577	230909	Gm572	170.576	0.514303	0.17325	-2.96856	0.00299203	0.026376
ENSMUSG00000024197	66905	Plin3	1936.56	0.380838	0.128307	-2.96817	0.00299579	0.0263935
ENSMUSG00000025995	73674	Wdr75	529.529	-0.470701	0.158651	2.96689	0.00300826	0.0264407
ENSMUSG00000051351	22704	Zfp46	1009.96	0.318157	0.107227	-2.96713	0.00300591	0.0264407
ENSMUSG00000023224	12258	Serping1	7616.67	-0.367663	0.123916	2.96703	0.00300689	0.0264407
ENSMUSG00000039410	70673	Prdm16	102.299	0.615922	0.207595	-2.96694	0.00300776	0.0264407
ENSMUSG00000009114	76964	2610028H24Rik	78.7389	0.748504	0.252327	-2.9664	0.00301308	0.0264673
ENSMUSG00000037999	212285	Arap2	1077	0.377746	0.12735	-2.96622	0.00301486	0.0264673
ENSMUSG00000049470	93736	Aff4	5447.29	-0.368366	0.124221	2.96542	0.00302274	0.0265209
ENSMUSG00000037129	214531	Tmprss13	46.3728	0.737243	0.248673	-2.96471	0.00302967	0.0265503
ENSMUSG00000032002	76863	Dcun1d5	896.478	-0.367306	0.123893	2.96471	0.00302964	0.0265503
ENSMUSG00000038644	18971	Pold1	244.984	0.525578	0.177469	-2.96152	0.0030612	0.0267792
ENSMUSG00000040163	73344	1700034J05Rik	34.174	0.749948	0.25322	-2.96164	0.00306006	0.0267792
ENSMUSG00000039917	215160	Rhbdd2	358.795	0.373682	0.126178	-2.96153	0.00306111	0.0267792
ENSMUSG00000038437	246198	Mllt6	3397.54	0.333852	0.112748	-2.96106	0.00306586	0.0267884
ENSMUSG00000040618	74551	Pck2	291.766	0.525368	0.177424	-2.96108	0.00306564	0.0267884
ENSMUSG00000029994	11746	Anxa4	682.287	-0.394088	0.133124	2.9603	0.00307338	0.0268383
ENSMUSG00000028034	51886	Fubp1	1661.7	-0.373011	0.126121	2.95756	0.00310088	0.027052
ENSMUSG00000029059	66469	2810405K02Rik	385.216	0.477785	0.161551	-2.9575	0.00310149	0.027052
ENSMUSG00000040724	16490	Kcna2	277.301	0.575036	0.194508	-2.95636	0.00311295	0.0271201
ENSMUSG00000031284	18481	Pak3	72.4036	-0.624204	0.211132	2.95646	0.0031119	0.0271201
ENSMUSG00000020017	15109	Hal	46.3844	0.713905	0.241516	-2.95594	0.00311722	0.0271414
ENSMUSG00000029524	75387	Sirt4	176.102	0.473136	0.160075	-2.95571	0.00311947	0.0271451
ENSMUSG00000048814	381338	Lonrf2	189.125	0.5842	0.197679	-2.9553	0.00312366	0.0271656
ENSMUSG00000035561	72535	Aldh1b1	3084.15	0.369052	0.124909	-2.95456	0.00313111	0.0271985
ENSMUSG00000021702	21828	Thbs4	45.2997	-0.736167	0.249152	2.95469	0.00312978	0.0271985
ENSMUSG00000020752	170472	Recql5	316.025	0.424386	0.143651	-2.95429	0.00313393	0.0272071
ENSMUSG00000030718	72590	Ppme1	914.606	-0.315112	0.106704	2.95315	0.00314552	0.027278
ENSMUSG00000028211	60599	Trp53inp1	917.459	-0.432071	0.14631	2.95312	0.00314577	0.027278
ENSMUSG00000068882	20823	Ssb	1445.64	-0.367216	0.12437	2.95261	0.00315096	0.0273071
ENSMUSG00000042632	53357	Pla2g6	301.226	0.491117	0.166347	-2.95237	0.00315348	0.027313
ENSMUSG00000001802	435965	Lrp3	563.35	-0.463746	0.157113	2.95168	0.00316055	0.0273424
ENSMUSG00000056481	70445	Cd248	333.34	-0.51247	0.173614	2.95177	0.00315954	0.0273424
ENSMUSG00000022757	21787	Tfg	1166.56	-0.405613	0.137476	2.95044	0.00317325	0.0274203
ENSMUSG00000029152	68095	Ociad1	3810.01	-0.309768	0.104989	2.95048	0.00317276	0.0274203
ENSMUSG00000003746	17155	Man1a	1872.61	-0.350998	0.119015	2.94919	0.00318607	0.027515
ENSMUSG00000061143	433586	Maml3	274.797	0.417525	0.141622	-2.94816	0.00319673	0.0275631
ENSMUSG00000002948	26400	Map2k7	1503.01	0.327199	0.110986	-2.94811	0.0031972	0.0275631
ENSMUSG00000042790	235315	Rnf214	1071.9	0.340028	0.115382	-2.94697	0.00320904	0.0276491
ENSMUSG00000060814	100503386	Gm4980	97.016	0.596568	0.202453	-2.9467	0.0032118	0.0276568
ENSMUSG00000044938	244923	Klhl31	5618.03	-0.307821	0.104485	2.94607	0.00321844	0.027698
ENSMUSG00000035064	13631	Eef2k	1066.84	0.346355	0.117606	-2.94504	0.00322914	0.027774
ENSMUSG00000029123	64293	Stk32b	42.156	0.752302	0.255706	-2.94206	0.00326042	0.0280268
ENSMUSG00000007877	21393	Tcap	31961.8	0.480231	0.163339	-2.94009	0.0032812	0.028163
ENSMUSG00000030083	80283	Abtb1	397.342	0.514981	0.175163	-2.94002	0.00328196	0.028163
ENSMUSG00000035595	69770	1600002K03Rik	60.5157	0.68359	0.232534	-2.93974	0.00328487	0.0281717
ENSMUSG00000020706	56095	Ftsj3	889.573	-0.32098	0.1092	2.93938	0.00328867	0.028188
ENSMUSG00000002908	84036	Kcnn1	286.319	0.476842	0.162336	-2.93738	0.00330998	0.028338
ENSMUSG00000078853	16145	Igtp	212.311	0.456501	0.155406	-2.93748	0.00330892	0.028338
ENSMUSG00000049047	71703	Armcx3	177.457	-0.514057	0.175055	2.93655	0.00331889	0.0283979
ENSMUSG00000038520	233204	Tbc1d17	895.268	0.417725	0.142264	-2.93627	0.00332183	0.0284067
ENSMUSG00000016308	22209	Ube2a	638.698	-0.361491	0.123141	2.93558	0.0033293	0.0284542
ENSMUSG00000035189	320091	Ano4	556.943	0.37481	0.127747	-2.93401	0.00334611	0.0285815
ENSMUSG00000021906	218885	Oxnad1	1189.34	-0.325703	0.111074	2.93232	0.00336444	0.0287215
ENSMUSG00000034247	353047	Plekhm1	568.79	0.388378	0.132522	-2.93066	0.00338238	0.0288581
ENSMUSG00000033082	243653	Clec1a	457.928	-0.46757	0.159631	2.92908	0.00339972	0.0289893
ENSMUSG00000015053	14461	Gata2	423.091	-0.505503	0.172604	2.92868	0.00340402	0.0290093
ENSMUSG00000022253	68646	1110020G09Rik	1378.47	0.355715	0.121498	-2.92775	0.0034143	0.0290802
ENSMUSG00000075284	215280	Wipf1	555.234	-0.465292	0.158945	2.92738	0.00341832	0.0290812
ENSMUSG00000000693	16950	Loxl3	224.661	-0.515185	0.17598	2.92751	0.00341685	0.0290812
ENSMUSG00000072235	22142	Tuba1a	15.2359	-0.832859	0.284604	2.92638	0.00342928	0.0291577
ENSMUSG00000027799	26422	Nbea	2562.69	0.322889	0.110358	-2.92583	0.00343537	0.0291928
ENSMUSG00000019846	16775	Lama4	5959.96	-0.278525	0.0952221	2.92501	0.00344446	0.0292366
ENSMUSG00000050511	18386	Oprd1	23.725	0.783171	0.267821	-2.92423	0.00345304	0.0292927
ENSMUSG00000036371	66870	Serbp1	6260.41	-0.269717	0.0922514	2.92372	0.00345876	0.0293244
ENSMUSG00000001419	17261	Mef2d	1214.58	0.400422	0.136986	-2.92308	0.00346587	0.029368
ENSMUSG00000041697	12861	Cox6a1	1190.65	-0.360157	0.123252	2.92212	0.00347659	0.0294204
ENSMUSG00000031824	234797	6430548M08Rik	1952.78	0.468369	0.160291	-2.92199	0.003478	0.0294204
ENSMUSG00000012422	66074	Tmem167	815.839	-0.40832	0.139728	2.92226	0.00347506	0.0294204
ENSMUSG00000010830	105785	Kdelr3	337.517	-0.410506	0.140536	2.921	0.00348915	0.0294909
ENSMUSG00000030748	16190	Il4ra	473.886	-0.539651	0.184755	2.92089	0.0034903	0.0294909
ENSMUSG00000020553	18559	Pctp	101.238	0.591441	0.202525	-2.92034	0.00349649	0.0295264
ENSMUSG00000030189	56449	Csda	2692.51	-0.31226	0.106969	2.91915	0.00350989	0.0296227
ENSMUSG00000006307	75410	Wbp7	889.466	0.373396	0.128039	-2.91626	0.00354253	0.0298812
ENSMUSG00000006732	17299	Mettl1	227.756	-0.45099	0.154658	2.91605	0.00354499	0.0298849
ENSMUSG00000030337	22317	Vamp1	252.543	0.501647	0.17214	-2.91419	0.00356618	0.0300338
ENSMUSG00000024921	67155	Smarca2	3512.33	0.287921	0.0988015	-2.91414	0.00356669	0.0300338
ENSMUSG00000024286	67974	Ccny	3199.73	-0.324975	0.111562	2.91296	0.00358022	0.0301306
ENSMUSG00000022215	68680	Fitm1	827.491	0.454941	0.156191	-2.91273	0.00358284	0.0301356
ENSMUSG00000047789	268706	Slc38a9	412.238	0.367791	0.126317	-2.91164	0.00359531	0.0302234
ENSMUSG00000040701	11766	Ap1g2	85.5209	0.597552	0.205241	-2.91146	0.00359742	0.0302241
ENSMUSG00000022546	76282	Gpt	265.57	0.45452	0.156158	-2.91063	0.00360696	0.030287
ENSMUSG00000027087	16410	Itgav	3146.58	-0.317739	0.109174	2.91039	0.00360972	0.0302931
ENSMUSG00000004631	20392	Sgce	528.817	-0.433353	0.148908	2.91022	0.00361177	0.0302932
ENSMUSG00000024750	22682	Zfand5	2966.73	-0.392541	0.134915	2.90954	0.00361956	0.0303414
ENSMUSG00000050592	241303	Fam78a	607.582	0.607633	0.208873	-2.9091	0.00362475	0.0303507
ENSMUSG00000031385	140571	Plxnb3	296.054	0.417966	0.14367	-2.9092	0.0036235	0.0303507
ENSMUSG00000041189	11443	Chrnb1	199.351	-0.516407	0.177526	2.90891	0.00362687	0.0303512
ENSMUSG00000055254	18212	Ntrk2	38.1507	-0.732719	0.251975	2.9079	0.00363863	0.0304325
ENSMUSG00000061079	20841	Zfp143	531.948	-0.390236	0.134224	2.90734	0.00364518	0.0304702
ENSMUSG00000021258	12454	Ccnk	347.681	0.410347	0.141221	-2.90571	0.00366425	0.0305951
ENSMUSG00000021737	66413	Psmd6	1239.27	-0.310976	0.107018	2.90583	0.00366284	0.0305951
ENSMUSG00000045625	239827	Pigz	71.7439	0.596803	0.205546	-2.9035	0.00369022	0.0307774
ENSMUSG00000012609	320244	Ttll5	629.134	0.331036	0.114075	-2.90191	0.00370892	0.0308884
ENSMUSG00000055053	18029	Nfic	2942.6	0.449128	0.15476	-2.90209	0.00370685	0.0308884
ENSMUSG00000049265	16527	Kcnk3	6432.15	0.468375	0.161406	-2.90184	0.00370976	0.0308884
ENSMUSG00000030218	17313	Mgp	13545.1	-0.732072	0.252392	2.90054	0.00372526	0.031
ENSMUSG00000046096	233812	BC030336	979.071	-0.461921	0.159274	2.90017	0.00372966	0.0310192
ENSMUSG00000037622	230796	Wdtc1	1353.24	0.397947	0.137226	-2.89994	0.00373233	0.0310241
ENSMUSG00000017453	19193	Pipox	13.6326	0.824862	0.284516	-2.89917	0.00374146	0.0310826
ENSMUSG00000038168	210530	Leprel1	106.308	-0.542978	0.187328	2.89854	0.00374899	0.0311277
ENSMUSG00000026435	212980	Slc45a3	324.535	-0.809986	0.279571	2.89725	0.00376451	0.0312217
ENSMUSG00000032777	233863	Gtf3c1	2988.78	0.304246	0.105006	-2.89741	0.00376258	0.0312217
ENSMUSG00000004360	212448	9330159F19Rik	88.1462	-0.652042	0.225091	2.89679	0.00376998	0.0312496
ENSMUSG00000059325	74318	Hopx	5131.39	-0.473319	0.163472	2.89542	0.00378649	0.0313689
ENSMUSG00000067071	55927	Hes6	217.012	0.514928	0.177863	-2.89508	0.00379057	0.0313696
ENSMUSG00000038831	241308	Ralgps1	115.096	0.539607	0.186388	-2.89507	0.00379079	0.0313696
ENSMUSG00000031340	14404	Gabre	15.559	0.822661	0.284258	-2.89406	0.00380294	0.0314526
ENSMUSG00000047497	239337	Adamts12	186.289	-0.506848	0.175204	2.89289	0.00381713	0.0315524
ENSMUSG00000032182	74766	Yipf2	218.245	0.479129	0.165646	-2.89249	0.00382201	0.0315751
ENSMUSG00000061244	105504	Exoc5	1165.78	-0.410566	0.142011	2.89108	0.00383916	0.0316992
ENSMUSG00000030747	67800	Dgat2	2368.65	0.496866	0.171888	-2.89064	0.00384462	0.0317267
ENSMUSG00000022415	20972	Syngr1	1113.48	0.357196	0.123602	-2.8899	0.00385365	0.0317835
ENSMUSG00000027412	64899	Lpin3	247.119	-0.4821	0.16696	2.88751	0.00388302	0.032008
ENSMUSG00000024325	19763	Ring1	137.208	0.503363	0.174376	-2.88666	0.00389353	0.0320768
ENSMUSG00000044340	98432	Phlpp1	1079.29	0.357361	0.123807	-2.88644	0.00389621	0.0320811
ENSMUSG00000058586	68607	Serhl	303.849	0.381144	0.132068	-2.88597	0.00390212	0.032112
ENSMUSG00000005204	80886	Senp3	775.499	-0.34921	0.121075	2.88426	0.0039234	0.0322394
ENSMUSG00000041859	17215	Mcm3	193.948	-0.484595	0.168017	2.8842	0.00392411	0.0322394
ENSMUSG00000025658	245684	Cnksr2	108.589	-0.677996	0.235062	2.88433	0.00392249	0.0322394
ENSMUSG00000037762	66859	Slc16a9	154.884	-0.457711	0.158726	2.88365	0.00393097	0.0322778
ENSMUSG00000060680	667952	Gm8894	100.993	-0.642859	0.222981	2.88301	0.00393891	0.0323252
ENSMUSG00000031871	12562	Cdh5	2289.95	-0.379448	0.131668	2.88186	0.00395338	0.0323367
ENSMUSG00000029158	75581	Yipf7	1227.9	-0.322571	0.111915	2.8823	0.00394788	0.0323367
ENSMUSG00000023075	68050	Akirin1	393.091	-0.454581	0.15772	2.8822	0.00394907	0.0323367
ENSMUSG00000023827	68262	Agpat4	161.465	-0.534073	0.185321	2.88188	0.00395304	0.0323367
ENSMUSG00000021061	20741	Spnb1	13311.3	0.338975	0.117608	-2.88223	0.00394867	0.0323367
ENSMUSG00000040488	108075	Ltbp4	13789.3	-0.485261	0.168446	2.88082	0.00396644	0.0324257
ENSMUSG00000026944	11305	Abca2	2189.75	0.402839	0.139853	-2.88045	0.00397105	0.0324455
ENSMUSG00000013033	330814	Lphn1	1732.27	0.371968	0.129185	-2.87935	0.00398492	0.032523
ENSMUSG00000014959	70231	Gorasp2	2259.25	-0.344134	0.119512	2.8795	0.00398311	0.032523
ENSMUSG00000064043	224829	Trerf1	115.463	0.550465	0.191205	-2.87892	0.00399038	0.0325498
ENSMUSG00000048251	58208	Bcl11b	109.826	0.709641	0.246574	-2.87801	0.00400193	0.032626
ENSMUSG00000027864	19221	Ptgfrn	5006.51	-0.282646	0.0982755	2.87606	0.00402676	0.0328105
ENSMUSG00000020692	217011	Nle1	128.903	0.708373	0.246333	-2.87567	0.0040317	0.0328327
ENSMUSG00000006390	54325	Elovl1	330.091	-0.393968	0.137039	2.87486	0.00404212	0.0328995
ENSMUSG00000006301	69660	Tmbim1	2039.78	-0.306601	0.106661	2.87453	0.00404633	0.0329158
ENSMUSG00000018820	319740	Zfyve27	722.247	0.346749	0.120663	-2.8737	0.00405699	0.0329664
ENSMUSG00000021180	73086	Rps6ka5	976.229	0.338724	0.117883	-2.87339	0.00406091	0.0329802
ENSMUSG00000038205	108097	Prkab2	1314.02	-0.383613	0.133556	2.8723	0.004075	0.0330765
ENSMUSG00000047419	76469	Cmya5	65122.5	0.409169	0.142579	-2.86978	0.00410763	0.0333232
ENSMUSG00000056919	382090	4922501C03Rik	336.838	0.403992	0.140865	-2.86794	0.00413157	0.0334895
ENSMUSG00000027536	66371	Chmp4c	354.22	0.404187	0.140937	-2.86786	0.00413265	0.0334895
ENSMUSG00000075592	277154	Nynrin	1029.43	0.409819	0.142941	-2.86705	0.00414316	0.0335564
ENSMUSG00000066571	233103	4931406P16Rik	764.621	-0.335947	0.117186	2.86677	0.00414682	0.0335678
ENSMUSG00000028634	16656	Hivep3	74.4887	0.620923	0.216657	-2.86593	0.00415791	0.0336392
ENSMUSG00000046671	76824	Fam54b	3868.34	-0.266227	0.0929235	2.86501	0.00416995	0.0337183
ENSMUSG00000031312	26549	Itgb1bp2	4060.19	-0.413135	0.144261	2.86381	0.00418585	0.0337864
ENSMUSG00000024059	78785	Clip4	5761.86	0.344563	0.120322	-2.86368	0.00418748	0.0337864
ENSMUSG00000026674	18214	Ddr2	3514.42	-0.378973	0.132334	2.86375	0.00418657	0.0337864
ENSMUSG00000024785	59028	Rcl1	169.756	-0.525327	0.183444	2.86369	0.00418736	0.0337864
ENSMUSG00000049687	338368	Fam109b	89.8736	-0.55435	0.193624	2.86302	0.0041962	0.0338321
ENSMUSG00000020067	68802	Mypn	4228.91	-0.298534	0.104277	2.86291	0.00419769	0.0338321
ENSMUSG00000030888	101867	Rrp8	421.59	-0.367986	0.128558	2.86242	0.00420416	0.0338659
ENSMUSG00000016319	11740	Slc25a5	1713.09	-0.332445	0.116154	2.8621	0.00420844	0.033882
ENSMUSG00000053253	76273	Ndfip2	538.978	-0.383025	0.133842	2.86176	0.00421294	0.0338996
ENSMUSG00000041598	56699	Cdc42ep4	548.644	-0.502112	0.175492	2.86117	0.00422079	0.0339079
ENSMUSG00000037845	382137	Fdxacb1	117.291	-0.503223	0.175907	2.86073	0.00422665	0.0339366
ENSMUSG00000056665	223626	4930572J05Rik	157.461	0.518583	0.181342	-2.8597	0.00424039	0.0340102
ENSMUSG00000020544	69802	Cox11	293.856	-0.416205	0.145535	2.85984	0.0042386	0.0340102
ENSMUSG00000049792	70369	Bag5	546.397	-0.36822	0.128818	2.85845	0.00425712	0.0341259
ENSMUSG00000050148	54609	Ubqln2	613.354	0.481501	0.168465	-2.85816	0.00426102	0.0341387
ENSMUSG00000041220	170439	Elovl6	68.2126	-0.696827	0.243852	2.85758	0.00426879	0.0341825
ENSMUSG00000045980	320534	Tmem104	250.242	0.461587	0.161572	-2.85684	0.00427877	0.034244
ENSMUSG00000021253	21809	Tgfb3	1762.97	-0.394676	0.138162	2.85662	0.0042818	0.0342498
ENSMUSG00000021699	238871	Pde4d	2309.73	0.431218	0.150969	-2.85633	0.00428565	0.0342621
ENSMUSG00000001348	11433	Acp5	72.426	-0.666338	0.233339	2.85567	0.00429461	0.0342988
ENSMUSG00000037580	14528	Gch1	163.585	-0.491203	0.172011	2.85565	0.00429486	0.0342988
ENSMUSG00000030062	103963	Rpn1	2190.94	-0.307734	0.107789	2.85497	0.00430405	0.0343538
ENSMUSG00000038342	208104	Mlxip	1751.52	0.395167	0.138462	-2.85398	0.00431754	0.0344429
ENSMUSG00000025417	117150	Pip4k2c	1871.9	0.316584	0.110937	-2.85374	0.00432079	0.0344504
ENSMUSG00000046567	68281	4930430F08Rik	181.171	0.508164	0.178124	-2.85287	0.00433268	0.0345267
ENSMUSG00000025531	12662	Chm	877.907	-0.458485	0.160776	2.85171	0.00434852	0.0346325
ENSMUSG00000020902	18208	Ntn1	2964.35	-0.393062	0.137841	2.85155	0.00435063	0.0346325
ENSMUSG00000070720	623230	Tmem200b	88.6342	-0.689209	0.241737	2.85108	0.00435716	0.0346659
ENSMUSG00000045333	94187	Zfp423	194.548	-0.527487	0.185031	2.8508	0.0043609	0.0346771
ENSMUSG00000055302	67568	Mrfap1	1785.98	-0.267803	0.093966	2.85	0.00437195	0.0347278
ENSMUSG00000049872	103511	Fam26e	116.323	-0.580624	0.203722	2.85008	0.00437081	0.0347278
ENSMUSG00000033952	12316	Aspm	27.6774	-0.760913	0.26715	2.84826	0.00439597	0.0348999
ENSMUSG00000036377	320827	C530008M17Rik	769.8	0.371947	0.130616	-2.84764	0.00440446	0.0349487
ENSMUSG00000071551	432720	Akr1c19	21.9345	0.786357	0.27625	-2.84654	0.00441968	0.0350507
ENSMUSG00000022297	14368	Fzd6	831.478	-0.376855	0.13242	2.8459	0.00442861	0.0351027
ENSMUSG00000021066	73991	Atl1	137.283	0.479063	0.168361	-2.84544	0.00443497	0.0351344
ENSMUSG00000040732	13876	Erg	494.133	-0.398646	0.140153	2.84437	0.00444995	0.0352155
ENSMUSG00000038740	72543	Fam125b	658.151	0.384125	0.135042	-2.84449	0.00444828	0.0352155
ENSMUSG00000072704	381820	2700089E24Rik	3863.24	-0.3229	0.113566	2.84328	0.00446518	0.0353172
ENSMUSG00000028057	19769	Rit1	1242.11	0.292609	0.102927	-2.84288	0.00447082	0.035343
ENSMUSG00000029669	269831	Tspan12	1012.76	-0.44341	0.156034	2.84176	0.00448658	0.0354488
ENSMUSG00000020894	22318	Vamp2	594.322	0.351453	0.123704	-2.84107	0.00449627	0.0355064
ENSMUSG00000031637	67620	Lrp2bp	48.6062	0.688098	0.242222	-2.84077	0.00450041	0.0355202
ENSMUSG00000030760	66190	Acer3	382.964	-0.440448	0.155091	2.83993	0.00451228	0.035595
ENSMUSG00000040102	232539	Klhdc5	457.895	-0.372917	0.131361	2.83887	0.0045273	0.0356945
ENSMUSG00000021957	21881	Tkt	712.97	-0.356528	0.125598	2.83863	0.0045307	0.0357024
ENSMUSG00000031119	14735	Gpc4	1035.33	0.462177	0.16284	-2.83823	0.00453646	0.0357289
ENSMUSG00000019942	12534	Cdk1	20.5661	-0.795156	0.28018	2.83802	0.00453948	0.0357337
ENSMUSG00000020900	77579	Myh10	2552.56	-0.276388	0.0973949	2.8378	0.00454253	0.0357387
ENSMUSG00000056310	100929	Tyw1	322.7	0.409153	0.144194	-2.83751	0.00454671	0.0357527
ENSMUSG00000030759	67420	Far1	1113.72	-0.380007	0.133932	2.83732	0.00454945	0.0357553
ENSMUSG00000037075	75841	Rnf139	1405.07	-0.401937	0.141717	2.8362	0.00456532	0.035861
ENSMUSG00000029126	18196	Nsg1	133.596	-0.55379	0.195271	2.83601	0.00456804	0.0358635
ENSMUSG00000031015	20947	Swap70	716.705	-0.383193	0.135155	2.83522	0.0045794	0.0359336
ENSMUSG00000028862	53608	Map3k6	638.125	-0.80763	0.284913	2.83465	0.00458755	0.0359786
ENSMUSG00000007833	69748	Aldh16a1	1301.36	0.439146	0.154944	-2.83423	0.00459367	0.035991
ENSMUSG00000004508	14389	Gab2	1669.55	-0.33135	0.116911	2.83421	0.00459398	0.035991
ENSMUSG00000067916	666532	Gm13139	46.5209	-0.744467	0.262697	2.83394	0.00459783	0.0360022
ENSMUSG00000039167	170757	Eltd1	1170.6	-0.545314	0.192453	2.8335	0.00460414	0.0360326
ENSMUSG00000060002	212862	Chpt1	8528.7	-0.315195	0.11126	2.83296	0.00461187	0.0360367
ENSMUSG00000029569	101118	Tmem168	859.991	-0.374049	0.132035	2.83296	0.00461195	0.0360367
ENSMUSG00000020072	68371	Pbld1	12.0815	0.802113	0.283124	-2.83308	0.00461017	0.0360367
ENSMUSG00000002546	99412	Golga2	4453.56	0.313722	0.110751	-2.83268	0.00461597	0.0360492
ENSMUSG00000036644	76795	Tbc1d9b	2875.76	0.316538	0.111778	-2.83184	0.00462815	0.0361253
ENSMUSG00000021835	12159	Bmp4	245.905	-0.461849	0.163128	2.8312	0.00463737	0.0361783
ENSMUSG00000029570	16848	Lfng	177.69	-0.560021	0.197865	2.83032	0.00465021	0.0362594
ENSMUSG00000024538	19038	Ppic	666.252	-0.419837	0.148364	2.82978	0.00465799	0.036301
ENSMUSG00000009772	74137	Nuak2	96.4919	-0.585058	0.206771	2.82949	0.00466216	0.0363145
ENSMUSG00000022707	74185	Gbe1	1907.13	-0.271706	0.0960403	2.82908	0.00466819	0.0363217
ENSMUSG00000019338	78266	Zfp687	499.089	0.3788	0.133902	-2.82893	0.00467042	0.0363217
ENSMUSG00000029029	59002	Wdr8	207.712	0.476171	0.168314	-2.82906	0.00466853	0.0363217
ENSMUSG00000040570	242819	Rundc3b	38.9215	-0.744333	0.263141	2.82865	0.0046745	0.0363344
ENSMUSG00000033306	210126	Lpp	3593.68	-0.421811	0.149143	2.82824	0.00468043	0.0363615
ENSMUSG00000020120	56193	Plek	339.089	-0.427405	0.151167	2.82737	0.0046932	0.0364225
ENSMUSG00000036533	260409	Cdc42ep3	1015.25	-0.335937	0.118816	2.82738	0.00469312	0.0364225
ENSMUSG00000037426	277854	Depdc5	838.768	0.311901	0.110396	-2.8253	0.00472363	0.0366396
ENSMUSG00000045287	237847	Rtn4rl1	263.386	0.505724	0.179096	-2.82377	0.00474632	0.0367963
ENSMUSG00000042308	233904	Setd1a	521.517	0.411923	0.1459	-2.82332	0.00475291	0.0368282
ENSMUSG00000000085	29871	Scmh1	579.27	0.37672	0.133463	-2.82266	0.00476264	0.0368844
ENSMUSG00000042532	71146	Golga7b	34.5467	0.770081	0.272855	-2.82231	0.00476797	0.0368911
ENSMUSG00000031872	65115	Bean1	46.4077	-0.73051	0.258838	2.82227	0.00476848	0.0368911
ENSMUSG00000030609	68048	Aen	463.655	-0.380525	0.134903	2.82074	0.00479135	0.0370488
ENSMUSG00000050234	14612	Gja4	217.889	-0.634315	0.224985	2.81936	0.00481194	0.0371886
ENSMUSG00000032085	21345	Tagln	271.191	-0.565791	0.20075	2.81839	0.0048265	0.0372772
ENSMUSG00000029234	21982	Tmem165	858.096	-0.357818	0.126964	2.81826	0.00482842	0.0372772
ENSMUSG00000040848	108735	Sft2d2	1918.39	-0.331933	0.117828	2.81709	0.00484607	0.037394
ENSMUSG00000019590	13056	Cyb561	429.926	-0.357961	0.12709	2.8166	0.00485355	0.0374323
ENSMUSG00000024610	16149	Cd74	747.927	-0.495052	0.17583	2.81552	0.00486989	0.0375388
ENSMUSG00000062762	13663	Ei24	1512.37	-0.307731	0.109323	2.81487	0.00487966	0.0375947
ENSMUSG00000029007	11610	Agtrap	1246.96	0.284849	0.101256	-2.81316	0.00490576	0.0377761
ENSMUSG00000029406	19679	Pitpnm2	1313.28	0.408713	0.145305	-2.81278	0.00491147	0.0378005
ENSMUSG00000029676	101185	Pot1a	503.68	0.374345	0.133194	-2.81052	0.0049461	0.0380364
ENSMUSG00000003233	13544	Dvl3	414.693	0.548194	0.195056	-2.81045	0.00494724	0.0380364
ENSMUSG00000079481	100042480	Nhsl2	435.832	-0.476264	0.169494	2.80992	0.00495544	0.0380797
ENSMUSG00000017781	18738	Pitpna	1694.17	-0.307942	0.109619	2.80921	0.00496628	0.0381433
ENSMUSG00000090958	434215	Lrrc32	440.922	-0.431401	0.153623	2.80817	0.00498238	0.0382472
ENSMUSG00000023977	224826	Ubr2	4178.21	0.365047	0.130106	-2.80576	0.00501979	0.0384945
ENSMUSG00000037071	20249	Scd1	4581.71	-0.78756	0.280845	2.80425	0.00504334	0.0386552
ENSMUSG00000018476	216850	Kdm6b	611.423	0.575768	0.205377	-2.80347	0.00505567	0.0387097
ENSMUSG00000055862	71564	Izumo4	111.054	0.592289	0.211264	-2.80354	0.00505446	0.0387097
ENSMUSG00000022892	11820	App	9973.72	-0.29635	0.105749	2.80238	0.00507264	0.0388197
ENSMUSG00000041202	18782	Pla2g2d	117.948	0.548618	0.1958	-2.80194	0.0050797	0.0388537
ENSMUSG00000033355	67775	Rtp4	81.3044	-0.634398	0.226481	2.8011	0.00509281	0.0389339
ENSMUSG00000020107	52717	Anapc16	786.096	-0.31146	0.111205	2.80076	0.0050982	0.0389551
ENSMUSG00000018809	319822	Smyd4	361.225	0.39003	0.13928	-2.80034	0.00510496	0.0389699
ENSMUSG00000054676	72244	1600014C10Rik	852.816	0.342625	0.122352	-2.80031	0.00510538	0.0389699
ENSMUSG00000032679	12509	Cd59a	1137.48	-0.336633	0.120251	2.79942	0.00511944	0.0390571
ENSMUSG00000075590	223649	Nrbp2	658.541	0.376839	0.134636	-2.79895	0.00512696	0.0390743
ENSMUSG00000053819	108058	Camk2d	5688.55	-0.331505	0.118437	2.79899	0.00512627	0.0390743
ENSMUSG00000029650	71706	Slc46a3	386.359	0.357258	0.12765	-2.79872	0.00513048	0.0390811
ENSMUSG00000038241	16328	Cep250	469.215	0.390576	0.13963	-2.79723	0.00515435	0.0392227
ENSMUSG00000038446	71713	Cdc40	467.055	0.326201	0.116613	-2.79729	0.00515339	0.0392227
ENSMUSG00000033149	208177	Phldb2	853.61	-0.394139	0.140959	2.79613	0.00517185	0.0393357
ENSMUSG00000024169	106633	Ift140	455.473	0.349422	0.125016	-2.79502	0.00518971	0.039411
ENSMUSG00000069520	67226	Tmem19	407.723	0.331997	0.11878	-2.79506	0.00518893	0.039411
ENSMUSG00000026970	56878	Rbms1	1327.92	-0.326955	0.117015	2.79413	0.00520393	0.0394988
ENSMUSG00000005802	22785	Slc30a4	814.694	-0.47739	0.170903	2.79334	0.00521675	0.0395759
ENSMUSG00000058498	433809	Rnf207	1323.6	0.296424	0.106128	-2.79308	0.00522093	0.0395874
ENSMUSG00000037235	17122	Mxd4	563.979	-0.376042	0.134687	2.79198	0.00523866	0.0396922
ENSMUSG00000037443	70012	Ccdc21	724.989	0.325962	0.116753	-2.79189	0.00524009	0.0396922
ENSMUSG00000032062	66952	2310030G06Rik	172.38	0.456205	0.16342	-2.79161	0.00524458	0.0396971
ENSMUSG00000034105	74347	4632415K11Rik	374.246	0.403616	0.144605	-2.79117	0.00525182	0.0397203
ENSMUSG00000034220	14733	Gpc1	16273.5	0.384566	0.137829	-2.79017	0.00526801	0.0398022
ENSMUSG00000001014	78369	Icam4	35.1416	0.712474	0.255391	-2.78974	0.00527504	0.039835
ENSMUSG00000022756	224022	Slc7a4	171.11	0.555278	0.199056	-2.78956	0.00527804	0.0398374
ENSMUSG00000067653	78321	Ankrd23	1675.82	-0.779852	0.279738	2.78779	0.00530684	0.0400036
ENSMUSG00000038074	231997	Fkbp14	510.359	-0.39204	0.140623	2.78788	0.0053054	0.0400036
ENSMUSG00000022451	19230	Twf1	424.327	-0.363371	0.130371	2.78722	0.00531626	0.0400242
ENSMUSG00000006715	57441	Gmnn	126.003	0.563002	0.201992	-2.78725	0.00531567	0.0400242
ENSMUSG00000031357	67043	Syap1	824.381	-0.359011	0.128858	2.78609	0.00533483	0.0401093
ENSMUSG00000020614	208659	Fam20a	168.834	-0.480883	0.172599	2.78614	0.00533403	0.0401093
ENSMUSG00000046722	57912	Cdc42se1	778.861	-0.349003	0.125269	2.78604	0.00533567	0.0401093
ENSMUSG00000030890	16202	Ilk	1181.98	-0.323935	0.116349	2.78417	0.00536647	0.0403204
ENSMUSG00000046245	231805	Pilra	11.6528	-0.793094	0.284893	2.78383	0.00537207	0.0403421
ENSMUSG00000057897	12323	Camk2b	386.519	0.455289	0.163623	-2.78255	0.00539337	0.0404816
ENSMUSG00000023328	11423	Ache	142.356	0.534172	0.191993	-2.78224	0.0053985	0.0404997
ENSMUSG00000010067	56289	Rassf1	396.554	-0.393262	0.141368	2.78183	0.00540527	0.04053
ENSMUSG00000051586	100505050	Mical3	1948.99	0.361896	0.130139	-2.78083	0.00542198	0.0405841
ENSMUSG00000022899	57738	Slc15a2	346.828	0.378858	0.136238	-2.78084	0.00542177	0.0405841
ENSMUSG00000019214	214901	Chtf18	42.6876	0.735466	0.264444	-2.78118	0.0054162	0.0405841
ENSMUSG00000024913	16973	Lrp5	1371.11	-0.400564	0.144049	2.78075	0.00542341	0.0405841
ENSMUSG00000005950	94045	P2rx5	587.125	-0.402374	0.144721	2.78035	0.00543005	0.0406133
ENSMUSG00000003526	19125	Prodh	1113.58	0.385659	0.138746	-2.7796	0.00544256	0.0406863
ENSMUSG00000042918	74490	Mamstr	184.099	0.455382	0.1639	-2.77842	0.00546243	0.0407733
ENSMUSG00000038056	231051	Mll3	4559.36	0.361014	0.129921	-2.77871	0.00545747	0.0407733
ENSMUSG00000029851	232748	Fam115c	148.093	-0.542238	0.195156	2.77848	0.00546131	0.0407733
ENSMUSG00000012443	16551	Kif11	40.9967	-0.689634	0.248362	2.77673	0.00549091	0.0409037
ENSMUSG00000032725	14276	Folr2	373.193	-0.473026	0.170339	2.77697	0.00548676	0.0409037
ENSMUSG00000053930	380702	Shisa6	16.4242	0.787407	0.283572	-2.77674	0.00549065	0.0409037
ENSMUSG00000026883	69601	Dab2ip	1648.77	-0.41897	0.15094	2.77574	0.0055076	0.0410074
ENSMUSG00000036469	72925	March1	101.677	-0.581844	0.20966	2.77518	0.00551712	0.0410313
ENSMUSG00000021557	67269	Agtpbp1	4393.11	0.31143	0.112217	-2.77525	0.00551587	0.0410313
ENSMUSG00000001827	14275	Folr1	25.1874	-0.753643	0.271577	2.77506	0.00551909	0.0410313
ENSMUSG00000007080	18973	Pole	102.756	0.619304	0.223196	-2.77471	0.00552515	0.0410558
ENSMUSG00000032739	378460	Pram1	63.0894	0.579357	0.20882	-2.77444	0.00552971	0.0410692
ENSMUSG00000013646	79566	Sh3bp5l	1073.48	-0.360444	0.129954	2.77363	0.00554354	0.0411513
ENSMUSG00000038013	68524	Wipf2	357.444	0.462474	0.166774	-2.77306	0.00555312	0.0412018
ENSMUSG00000025348	16404	Itga7	4502.04	0.365574	0.131857	-2.7725	0.00556272	0.0412524
ENSMUSG00000022562	75475	Oplah	1557.13	0.402096	0.145069	-2.77175	0.00557551	0.0412649
ENSMUSG00000015354	76477	Pcolce2	1228.5	-0.439125	0.158418	2.77194	0.00557229	0.0412649
ENSMUSG00000002608	52132	Ccdc97	643.096	0.423458	0.152756	-2.77212	0.00556921	0.0412649
ENSMUSG00000030654	54208	Arl6ip1	722.08	-0.372645	0.134442	2.77178	0.00557504	0.0412649
ENSMUSG00000026466	208263	Tor1aip1	2103.45	0.33785	0.121925	-2.77096	0.00558906	0.0413445
ENSMUSG00000046410	52150	Kcnk6	266.165	-0.483333	0.174578	2.76857	0.00563031	0.041629
ENSMUSG00000037007	56314	Zfp113	351.709	0.357282	0.129089	-2.76772	0.00564492	0.0417162
ENSMUSG00000055923	231326	Aasdh	292.883	0.391885	0.141611	-2.76734	0.00565161	0.0417449
ENSMUSG00000030615	66271	Tmem126a	1124.59	-0.415046	0.150024	2.76652	0.00566578	0.0418035
ENSMUSG00000025010	240665	Ccnj	131.144	-0.539556	0.195043	2.76635	0.00566884	0.0418035
ENSMUSG00000010064	76257	Slc38a3	1347.99	0.399868	0.144553	-2.76623	0.0056708	0.0418035
ENSMUSG00000029490	243197	Mfsd7a	123.705	0.540956	0.19553	-2.76661	0.0056642	0.0418035
ENSMUSG00000027787	97112	Nmd3	407.568	-0.386059	0.139595	2.76557	0.00568229	0.0418674
ENSMUSG00000024118	72016	1600002H07Rik	81.3233	0.558812	0.202104	-2.76497	0.00569282	0.0419034
ENSMUSG00000056071	20202	S100a9	14.9638	0.784911	0.284035	-2.76343	0.00571974	0.0420599
ENSMUSG00000037370	18605	Enpp1	558.181	-0.365229	0.132247	2.76171	0.00575001	0.0422198
ENSMUSG00000046949	18105	Nqo2	1140.96	0.305898	0.110762	-2.76176	0.00574902	0.0422198
ENSMUSG00000021610	218335	Clptm1l	1665.95	-0.28343	0.102646	2.76124	0.00575828	0.0422388
ENSMUSG00000041731	226041	Pgm5	12103.9	-0.298799	0.108208	2.76135	0.00575633	0.0422388
ENSMUSG00000039671	228880	Zmynd8	953.241	0.310738	0.112586	-2.76	0.0057801	0.0423779
ENSMUSG00000041870	68420	Ankrd13a	1216.06	-0.285885	0.10359	2.75978	0.00578407	0.0423861
ENSMUSG00000038550	229599	Gm129	167.543	-0.521849	0.18912	2.75935	0.0057916	0.0424024
ENSMUSG00000035403	241324	Crb2	316.655	0.388391	0.140777	-2.7589	0.00579955	0.0424367
ENSMUSG00000028825	19746	Rhd	52.9813	0.605153	0.219503	-2.75692	0.00583492	0.0426745
ENSMUSG00000022191	14000	Drosha	1308.94	0.287658	0.104366	-2.75624	0.00584694	0.0427414
ENSMUSG00000043241	326622	Upf2	1137.44	0.353554	0.128283	-2.75605	0.00585049	0.0427463
ENSMUSG00000022197	68070	Pdzd2	9341.79	0.374272	0.135828	-2.75549	0.00586038	0.0427554
ENSMUSG00000034853	329910	Acot11	1034.2	0.308867	0.112104	-2.75519	0.00586588	0.0427648
ENSMUSG00000027684	14013	Mecom	747.626	-0.316506	0.11488	2.7551	0.00586741	0.0427648
ENSMUSG00000031147	54634	Magix	175.073	0.438123	0.159065	-2.75436	0.00588067	0.0428404
ENSMUSG00000032267	235323	Usp28	4764.49	-0.314921	0.114352	2.75397	0.00588766	0.0428508
ENSMUSG00000002565	20259	Scin	70.6866	0.553362	0.200933	-2.75396	0.00588787	0.0428508
ENSMUSG00000041879	226432	Ipo9	1504.82	-0.265087	0.0962855	2.75314	0.00590267	0.0429354
ENSMUSG00000021765	14313	Fst	44.9938	-0.683624	0.24832	2.75299	0.00590529	0.0429354
ENSMUSG00000028601	52430	Echdc2	835.726	0.302768	0.110039	-2.75147	0.00593281	0.0430513
ENSMUSG00000042109	105859	Csdc2	2810.81	0.431667	0.156867	-2.75181	0.0059267	0.0430513
ENSMUSG00000036402	14701	Gng12	922.363	-0.427122	0.155222	2.75168	0.00592898	0.0430513
ENSMUSG00000048368	27047	Omd	59.4882	-0.725926	0.263818	2.75161	0.00593027	0.0430513
ENSMUSG00000032437	68292	Stt3b	2033.5	-0.266754	0.0969588	2.75121	0.00593754	0.0430645
ENSMUSG00000030617	75338	Ccdc83	24.8836	-0.754725	0.274511	2.74934	0.00597154	0.04329
ENSMUSG00000079469	55981	Pigb	116.489	0.509617	0.185402	-2.74871	0.00598296	0.0433516
ENSMUSG00000005836	14465	Gata6	1742.49	0.302539	0.110083	-2.74828	0.00599089	0.043388
ENSMUSG00000041642	16565	Kif21b	93.8698	0.549729	0.200077	-2.74758	0.0060036	0.0434004
ENSMUSG00000020577	66109	Tspan13	775.185	-0.36887	0.134254	2.74755	0.0060043	0.0434004
ENSMUSG00000063801	11778	Ap3s2	842.532	0.310018	0.112829	-2.74769	0.00600172	0.0434004
ENSMUSG00000078137	383787	Gm1337	72.4855	0.564767	0.205534	-2.74781	0.00599952	0.0434004
ENSMUSG00000038967	18604	Pdk2	3573.11	0.364557	0.132706	-2.74711	0.00601231	0.0434126
ENSMUSG00000034993	26949	Vat1	846.983	-0.427534	0.155635	2.74703	0.00601373	0.0434126
ENSMUSG00000022983	224432	Scaf4	361.909	0.417715	0.15209	-2.74649	0.00602362	0.0434555
ENSMUSG00000020431	432530	Adcy1	4902.43	0.299956	0.109282	-2.74479	0.00605496	0.0436428
ENSMUSG00000040407	100986	Akap9	6369.97	0.302645	0.110263	-2.74476	0.00605547	0.0436428
ENSMUSG00000028609	17149	Magoh	355.278	-0.368306	0.134276	2.74289	0.00609007	0.0438371
ENSMUSG00000050912	71929	Tmem123	1448.52	-0.346318	0.126263	2.74283	0.00609127	0.0438371
ENSMUSG00000027210	17536	Meis2	664.451	0.30468	0.111075	-2.74301	0.00608785	0.0438371
ENSMUSG00000041992	217944	Rapgef5	1468.94	-0.410636	0.149736	2.7424	0.00609918	0.0438727
ENSMUSG00000035314	233552	Gdpd5	664.575	0.381069	0.138985	-2.7418	0.00611039	0.0439108
ENSMUSG00000028977	69743	Casz1	1170.79	0.474341	0.172998	-2.74188	0.00610879	0.0439108
ENSMUSG00000025860	11798	Xiap	2075.95	-0.447536	0.163248	2.74146	0.00611673	0.0439351
ENSMUSG00000060206	242466	Zfp462	1012.99	0.370257	0.135094	-2.74073	0.00613024	0.0439896
ENSMUSG00000036995	230837	Asap3	273.539	0.413809	0.150982	-2.74078	0.00612938	0.0439896
ENSMUSG00000051316	24074	Taf7	324.384	-0.454957	0.166022	2.74035	0.00613743	0.04402
ENSMUSG00000016940	70382	Kctd2	466.678	0.364907	0.133252	-2.73846	0.00617269	0.0442515
ENSMUSG00000064326	30954	Siva1	201.845	0.465481	0.170016	-2.73787	0.00618388	0.0443103
ENSMUSG00000036568	210982	BC032203	748.581	0.346604	0.126623	-2.73729	0.00619469	0.0443664
ENSMUSG00000022500	56722	Litaf	684.607	-0.358705	0.131056	2.73704	0.0061994	0.0443788
ENSMUSG00000055639	13134	Dach1	301.233	0.485003	0.177395	-2.73402	0.00625659	0.0447666
ENSMUSG00000036437	18166	Npy1r	595.709	0.531019	0.194246	-2.73375	0.00626173	0.0447818
ENSMUSG00000061462	380698	Obscn	64464	0.463175	0.169519	-2.73228	0.00628971	0.044948
ENSMUSG00000021367	13614	Edn1	77.4249	-0.596956	0.218488	2.73221	0.00629103	0.044948
ENSMUSG00000025190	14718	Got1	11951.3	0.294012	0.107698	-2.72997	0.00633398	0.0452114
ENSMUSG00000047368	226016	Fam108b	379.819	-0.366218	0.134207	2.72875	0.00635745	0.0453572
ENSMUSG00000020407	22271	Upp1	54.1171	-0.764502	0.280361	2.72685	0.00639421	0.0455616
ENSMUSG00000023806	100037282	Rsph3b	99.1497	0.576189	0.211299	-2.72689	0.00639349	0.0455616
ENSMUSG00000000838	14265	Fmr1	558.921	-0.401245	0.147149	2.72679	0.00639531	0.0455616
ENSMUSG00000026208	13346	Des	27867.5	0.423177	0.155212	-2.72644	0.00640221	0.0455889
ENSMUSG00000042079	98758	Hnrnpf	290.15	-0.386875	0.141913	2.72614	0.00640797	0.045608
ENSMUSG00000050248	68525	Evc2	556.836	0.345785	0.126859	-2.72573	0.00641587	0.0456424
ENSMUSG00000030660	18704	Pik3c2a	1701.39	-0.35776	0.131304	2.72466	0.00643669	0.0457686
ENSMUSG00000046798	64945	Cldn12	1178.64	-0.334892	0.122962	2.72355	0.00645848	0.0459015
ENSMUSG00000089911	15247	Hiat1	714.186	-0.32755	0.120276	2.72333	0.00646278	0.0459101
ENSMUSG00000027002	50884	Nckap1	2604.77	-0.365907	0.134489	2.72073	0.00651378	0.0462504
ENSMUSG00000037344	83704	Slc12a9	169.276	0.489152	0.179807	-2.72043	0.00651966	0.0462699
ENSMUSG00000039686	227693	Zer1	1020.37	0.362431	0.133242	-2.7201	0.00652614	0.0462938
ENSMUSG00000027194	74569	Ttc17	1272.86	0.305072	0.112175	-2.71961	0.00653593	0.0463412
ENSMUSG00000039298	214444	Cdk5rap2	566.104	0.320336	0.117823	-2.7188	0.00655193	0.0464324
ENSMUSG00000044562	69903	Rasip1	616.871	-0.49542	0.182304	2.71755	0.00657672	0.0465859
ENSMUSG00000037166	68458	Ppp1r14a	49.3409	-0.683058	0.251377	2.71727	0.00658234	0.0466035
ENSMUSG00000025138	209011	Sirt7	274.585	0.432736	0.159281	-2.71681	0.00659145	0.046629
ENSMUSG00000026768	241226	Itga8	120.681	-0.492039	0.181112	2.71677	0.00659222	0.046629
ENSMUSG00000042622	17133	Maff	316.069	-0.773306	0.284687	2.71634	0.0066009	0.0466681
ENSMUSG00000047181	217125	Samd14	134.19	0.470932	0.173407	-2.71576	0.00661237	0.046727
ENSMUSG00000038502	84113	Ptov1	2084.36	0.327202	0.120525	-2.7148	0.00663149	0.0467731
ENSMUSG00000055745	223732	Ldoc1l	362.03	0.466545	0.171828	-2.71518	0.00662398	0.0467731
[truncated: 11,791 more rows]
