# Supplementary material for: An atrial fibrillation-associated regulatory region modulates cardiac Tbx5 levels and arrhythmia susceptibility
Source: eLife. 2023 Jan 30;12:e80317. doi: 10.7554/eLife.80317 (PMC9928424; doi:10.7554/eLife.80317)
Supplement: Supplementary file 3. [file elife-80317-supp3.xlsx]

## Sheet: Sheet1
Supplemental fily 3. DESeq2 result WT v Tbx5RE(down)KO adult left atria
Ensembl Gene ID	EntrezGene ID	Associated Gene Name	Base mean	Log2FC (+ is higher in RE(down)-/-)	StdErr	Wald-Stats	P-value	P-adj
ENSMUSG00000027338	26434	Prnd	67.2927	1.55313	0.195837	-7.93075	2.17823e-15	3.16171e-11
ENSMUSG00000062329	231162	Cytl1	2580.62	-1.07308	0.17734	6.051	1.43951e-09	6.96483e-06
ENSMUSG00000052512	78286	Nav2	2829.2	0.838707	0.148285	-5.65606	1.54883e-08	4.49626e-05
ENSMUSG00000023885	21826	Thbs2	1685.74	-0.774573	0.139582	5.54924	2.86911e-08	6.94086e-05
ENSMUSG00000043903	195209	Gm22	227.81	0.887678	0.162306	-5.46916	4.52177e-08	9.37622e-05
ENSMUSG00000061315	17938	Naca	3324.82	0.930464	0.175473	-5.30261	1.14157e-07	0.000147781
ENSMUSG00000000317	12029	Bcl6b	523.714	0.740259	0.139453	-5.30832	1.10641e-07	0.000147781
ENSMUSG00000027004	20378	Frzb	465.474	-0.79428	0.150142	5.29021	1.22175e-07	0.000147781
ENSMUSG00000027375	17153	Mal	614.56	-1.02723	0.192771	5.32875	9.88887e-08	0.000147781
ENSMUSG00000038267	73102	Slc22a23	785.249	0.712992	0.133652	-5.33467	9.57162e-08	0.000147781
ENSMUSG00000027848	99543	Olfml3	784.771	-0.664377	0.128408	5.17397	2.29173e-07	0.000227438
ENSMUSG00000029335	110075	Bmp3	434.712	-0.905145	0.175102	5.16925	2.35038e-07	0.000227438
ENSMUSG00000069515	17110	Lyz1	45.4069	-1.0825	0.210072	5.15302	2.56322e-07	0.000232532
ENSMUSG00000026879	227753	Gsn	117872	-0.871964	0.170523	5.11347	3.16293e-07	0.000270058
ENSMUSG00000004098	53867	Col5a3	503.771	0.960148	0.190478	-5.04073	4.63766e-07	0.000373976
ENSMUSG00000045967	241263	Gpr158	827.12	0.813554	0.163221	-4.98436	6.21677e-07	0.000451182
ENSMUSG00000015354	76477	Pcolce2	1359.95	-0.599227	0.120128	4.98826	6.09268e-07	0.000451182
ENSMUSG00000030683	233878	Sez6l2	48.8979	1.05069	0.213459	-4.9222	8.55762e-07	0.000565341
ENSMUSG00000006386	21687	Tek	3611.82	-0.555374	0.11475	4.83987	1.29926e-06	0.000819944
ENSMUSG00000038776	13849	Ephx1	1835.51	-0.729962	0.151089	4.83134	1.35619e-06	0.000820215
ENSMUSG00000048154	381022	Mll2	4816.36	0.820823	0.17044	-4.81591	1.4653e-06	0.000850751
ENSMUSG00000050295	17300	Foxc1	1124.46	-0.796266	0.16589	4.79996	1.58698e-06	0.000885965
ENSMUSG00000026365	12628	Cfh	23667.7	-0.716427	0.151137	4.74026	2.13447e-06	0.00106834
ENSMUSG00000055320	21676	Tead1	6093.95	0.794581	0.167565	-4.74193	2.1169e-06	0.00106834
ENSMUSG00000046182	269994	Gsg1l	79.5037	0.909404	0.192684	-4.71966	2.3624e-06	0.00110875
ENSMUSG00000071862	107065	Lrrtm2	332.045	0.806633	0.170926	-4.71918	2.36799e-06	0.00110875
ENSMUSG00000022206	18162	Npr3	19346.3	-0.698455	0.148254	4.7112	2.46258e-06	0.00111701
ENSMUSG00000020644	15902	Id2	560.201	-0.702299	0.149787	4.68865	2.75009e-06	0.00120962
ENSMUSG00000024793	85030	Tnfrsf25	84.3493	0.881724	0.189494	-4.65305	3.27059e-06	0.00139625
ENSMUSG00000041329	11932	Atp1b2	153.17	0.786816	0.169577	-4.63988	3.48608e-06	0.00144573
ENSMUSG00000002602	26362	Axl	8105.89	-0.641029	0.139226	4.60423	4.13989e-06	0.00166918
ENSMUSG00000020717	18613	Pecam1	11990.7	-0.775429	0.169084	4.58606	4.51683e-06	0.00177194
ENSMUSG00000026605	108000	Cenpf	98.9685	0.946908	0.206871	-4.57729	4.71044e-06	0.00179926
ENSMUSG00000030137	53857	Tuba8	2197.13	-0.701568	0.154336	4.54571	5.47507e-06	0.00198677
ENSMUSG00000047250	19224	Ptgs1	2034.15	-0.754095	0.165849	4.54689	5.44439e-06	0.00198677
ENSMUSG00000019929	13179	Dcn	36213.3	-0.745487	0.165352	4.50849	6.52899e-06	0.00231142
ENSMUSG00000035112	69847	Wnk4	597.981	0.881386	0.195897	-4.49923	6.81992e-06	0.00235693
ENSMUSG00000040721	239102	Zfhx2	106.818	0.937513	0.209229	-4.4808	7.43653e-06	0.00251026
ENSMUSG00000024087	13078	Cyp1b1	1915.81	-0.821227	0.183504	4.47525	7.63223e-06	0.00251777
ENSMUSG00000025409	110962	Mbd6	234.122	0.870925	0.195299	-4.45945	8.21692e-06	0.0025928
ENSMUSG00000035493	21810	Tgfbi	2093.52	-0.690723	0.155441	4.44363	8.84545e-06	0.00271472
ENSMUSG00000008540	56615	Mgst1	919.49	-0.679449	0.153014	4.44044	8.97737e-06	0.00271472
ENSMUSG00000021638	18260	Ocln	133.479	-0.750608	0.169537	4.42739	9.53809e-06	0.00282542
ENSMUSG00000027875	15360	Hmgcs2	385.396	-0.758475	0.171718	4.41698	1.00091e-05	0.00290564
ENSMUSG00000028364	21923	Tnc	62.9374	0.933991	0.211995	-4.40572	1.05435e-05	0.00300075
ENSMUSG00000031740	17390	Mmp2	5991.45	-0.526785	0.119801	4.39717	1.09673e-05	0.00306134
ENSMUSG00000022528	15205	Hes1	523.974	-0.62659	0.143035	4.38069	1.18306e-05	0.00318003
ENSMUSG00000029095	231148	Ablim2	892.412	0.701441	0.160043	-4.38282	1.17154e-05	0.00318003
ENSMUSG00000025492	66141	Ifitm3	1193.89	-0.605593	0.138418	4.37512	1.21368e-05	0.00320302
ENSMUSG00000032725	14276	Folr2	409.098	-0.637027	0.145734	4.37116	1.23588e-05	0.00320336
ENSMUSG00000005483	81489	Dnajb1	805.794	0.758406	0.174899	-4.33626	1.44929e-05	0.00350172
ENSMUSG00000016756	12763	Cmah	308.08	-0.611218	0.140886	4.33838	1.43539e-05	0.00350172
ENSMUSG00000021474	14057	Sfxn1	615.336	-0.564574	0.129938	4.34494	1.39316e-05	0.00350172
ENSMUSG00000030787	114332	Lyve1	2234.56	-0.840829	0.19399	4.33439	1.46167e-05	0.00350172
ENSMUSG00000020914	21973	Top2a	149.077	0.926248	0.214761	-4.31292	1.6111e-05	0.00377179
ENSMUSG00000033952	12316	Aspm	68.1875	0.870785	0.202176	-4.30707	1.6543e-05	0.00381145
ENSMUSG00000047878	239559	A4galt	351.448	-0.567606	0.132527	4.28294	1.84441e-05	0.00418307
ENSMUSG00000021258	12454	Ccnk	438.719	0.590062	0.138507	-4.26015	2.04288e-05	0.00456191
ENSMUSG00000037996	76376	Slc24a2	598.719	0.697835	0.164347	-4.24611	2.17518e-05	0.00471368
ENSMUSG00000030562	50490	Nox4	109.48	-0.777711	0.183288	4.24311	2.20448e-05	0.00471368
ENSMUSG00000027074	58207	Slc43a3	2713.28	-0.603848	0.142326	4.24272	2.20827e-05	0.00471368
ENSMUSG00000022090	213019	Pdlim2	303.158	-0.616124	0.146305	4.21122	2.53994e-05	0.00534309
ENSMUSG00000042605	20239	Atxn2	1551.97	0.587157	0.139563	-4.20712	2.58646e-05	0.0053632
ENSMUSG00000022894	23794	Adamts5	1848.2	-0.511349	0.122054	4.18954	2.7952e-05	0.00563504
ENSMUSG00000030847	29810	Bag3	4341.79	0.58686	0.140709	-4.17073	3.03626e-05	0.00603717
ENSMUSG00000032177	18577	Pde4a	1439.37	0.722895	0.173744	-4.16068	3.17298e-05	0.00622376
ENSMUSG00000024330	12815	Col11a2	107.843	0.863547	0.207747	-4.15673	3.22829e-05	0.00624781
ENSMUSG00000031004	17345	Mki67	235.225	0.880136	0.212362	-4.1445	3.40555e-05	0.00650415
ENSMUSG00000028476	53614	Reck	820.87	-0.610073	0.147745	4.12924	3.63972e-05	0.0067005
ENSMUSG00000048218	105827	Amigo2	562.113	-0.688904	0.166688	4.13289	3.58228e-05	0.0067005
ENSMUSG00000006369	14114	Fbln1	9187.45	-0.592462	0.144159	4.10979	3.96025e-05	0.00701013
ENSMUSG00000026473	14645	Glul	5332.24	-0.68471	0.166494	4.11252	3.91369e-05	0.00701013
ENSMUSG00000006219	74202	Fblim1	2506.74	0.51568	0.126031	-4.09169	4.28239e-05	0.00739987
ENSMUSG00000031825	78892	Crispld2	3829.11	-0.604824	0.147721	4.09437	4.23319e-05	0.00739987
ENSMUSG00000031849	12845	Comp	960.759	-0.680852	0.166873	4.08005	4.50261e-05	0.00768888
ENSMUSG00000029231	18595	Pdgfra	5370.76	-0.617008	0.151474	4.07337	4.63383e-05	0.00773104
ENSMUSG00000061589	208266	Dot1l	682.091	0.611895	0.15012	-4.07603	4.58104e-05	0.00773104
ENSMUSG00000074207	11522	Adh1	933.716	-0.703498	0.173073	4.06476	4.80823e-05	0.00793085
ENSMUSG00000000753	20317	Serpinf1	1173.14	-0.625589	0.154113	4.0593	4.92203e-05	0.00798859
ENSMUSG00000003233	13544	Dvl3	547.961	0.739961	0.18247	-4.05524	5.00835e-05	0.00798859
ENSMUSG00000020607	105005	Fam84a	184.769	-0.694147	0.171169	4.05533	5.00628e-05	0.00798859
ENSMUSG00000053293	107939	Pom121	404.432	0.608808	0.151214	-4.02613	5.67033e-05	0.00875583
ENSMUSG00000037664	12577	Cdkn1c	653.806	-0.622838	0.154543	4.03019	5.57309e-05	0.00875583
ENSMUSG00000055639	13134	Dach1	385.549	0.659764	0.163815	-4.02749	5.63747e-05	0.00875583
ENSMUSG00000022665	67896	Ccdc80	10140	-0.53049	0.132063	4.01694	5.89593e-05	0.00900837
ENSMUSG00000031616	13617	Ednra	2163.85	0.496762	0.123965	-4.00728	6.14224e-05	0.00928694
ENSMUSG00000015944	80909	Gatsl2	1052.78	0.701703	0.175757	-3.99245	6.5394e-05	0.00968565
ENSMUSG00000031119	14735	Gpc4	1455.94	0.751988	0.188504	-3.98924	6.62858e-05	0.00971858
ENSMUSG00000000276	56077	Dgke	625.503	-0.55671	0.139751	3.9836	6.78793e-05	0.00975513
ENSMUSG00000024002	57261	Brd4	763.293	0.6073	0.15272	-3.97657	6.99175e-05	0.00994954
ENSMUSG00000020926	11488	Adam11	835.059	0.803819	0.20306	-3.95852	7.54142e-05	0.0106275
ENSMUSG00000056476	329650	Med12l	591.232	0.531087	0.134734	-3.94174	8.08917e-05	0.0112898
ENSMUSG00000021186	23876	Fbln5	1174.84	-0.607442	0.154561	3.93012	8.49026e-05	0.0115174
ENSMUSG00000054555	11489	Adam12	31.1024	0.846066	0.215259	-3.93046	8.47833e-05	0.0115174
ENSMUSG00000032637	233871	Atxn2l	957.511	0.560161	0.143102	-3.91442	9.06213e-05	0.0120676
ENSMUSG00000032184	70082	Lysmd2	472.032	-0.490201	0.125196	3.91546	9.02323e-05	0.0120676
ENSMUSG00000023036	93723	Pcdhga9	293.13	0.595984	0.152396	-3.91077	9.20034e-05	0.0121403
ENSMUSG00000033595	213469	Lgi3	71.3165	0.789378	0.202174	-3.90446	9.4437e-05	0.0123491
ENSMUSG00000017493	16010	Igfbp4	7364.29	-0.512845	0.131743	3.89278	9.91036e-05	0.0128437
ENSMUSG00000034926	74754	Dhcr24	161.398	0.706081	0.181859	-3.88258	0.000103356	0.0131149
ENSMUSG00000052727	17755	Mtap1b	2730.54	0.385763	0.0993905	-3.88128	0.000103907	0.0131149
ENSMUSG00000031613	15446	Hpgd	509.147	-0.739272	0.190641	3.87782	0.000105399	0.0131885
ENSMUSG00000029581	14086	Fscn1	432.826	0.597257	0.154722	-3.86018	0.000113303	0.0139969
ENSMUSG00000057606	382864	Colq	69.1079	0.828374	0.214653	-3.85914	0.000113788	0.0139969
ENSMUSG00000032487	19225	Ptgs2	365.107	-0.624402	0.162878	3.83356	0.000126302	0.0154056
ENSMUSG00000030317	110595	Timp4	478.915	-0.640443	0.167499	3.82357	0.000131534	0.0154481
ENSMUSG00000048120	12495	Entpd1	1657.03	-0.706313	0.184442	3.82946	0.000128427	0.0154481
ENSMUSG00000038604	75687	Fam65a	954.01	0.667574	0.174538	-3.8248	0.000130878	0.0154481
ENSMUSG00000058925	75444	1700011I03Rik	51.2668	-0.801594	0.209483	3.82653	0.000129964	0.0154481
ENSMUSG00000038648	208647	Creb3l2	3747.06	0.46091	0.12057	-3.82275	0.000131972	0.0154481
ENSMUSG00000018476	216850	Kdm6b	754.097	0.665753	0.174915	-3.80616	0.00014114	0.0163892
ENSMUSG00000028211	60599	Trp53inp1	1013.03	-0.573084	0.150752	3.80151	0.000143819	0.0165677
ENSMUSG00000014164	100503085	Klhl3	117.569	0.680171	0.179253	-3.79449	0.00014795	0.0169094
ENSMUSG00000017969	19223	Ptgis	1843.19	-0.552623	0.145798	3.79035	0.000150437	0.0169689
ENSMUSG00000036057	104831	Ptpn23	638.29	0.575198	0.151778	-3.78973	0.000150808	0.0169689
ENSMUSG00000034413	240055	Neurl1b	128.758	0.694516	0.183823	-3.77817	0.000157984	0.0176396
ENSMUSG00000051041	244198	Olfml1	385.173	-0.564385	0.149949	3.76385	0.000167319	0.0185392
ENSMUSG00000063021	319169	Hist1h2ak	22.8002	0.807912	0.214773	-3.7617	0.000168763	0.0185576
ENSMUSG00000028396	71886	2310002L09Rik	921.155	-0.607231	0.161823	3.75244	0.000175124	0.0189612
ENSMUSG00000038156	233744	Spon1	2944.44	-0.507657	0.13535	3.75068	0.000176353	0.0189612
ENSMUSG00000036959	320376	Bcorl1	401.249	0.627091	0.16713	-3.75211	0.000175356	0.0189612
ENSMUSG00000038943	233406	Prc1	55.3286	0.80226	0.214214	-3.74514	0.000180294	0.0191608
ENSMUSG00000025316	53325	Banp	413.733	0.727035	0.194168	-3.74437	0.00018085	0.0191608
ENSMUSG00000030217	109978	Art4	265.213	-0.714229	0.191393	3.73174	0.000190158	0.0195755
ENSMUSG00000033544	72713	Angptl1	177.884	-0.689061	0.184564	3.73345	0.000188872	0.0195755
ENSMUSG00000036985	208884	Zdhhc9	803.531	0.748487	0.200394	-3.73507	0.000187661	0.0195755
ENSMUSG00000053877	100043597	Srcap	3463.7	0.503001	0.134883	-3.72917	0.000192111	0.0196373
ENSMUSG00000045962	232341	Wnk1	20055.9	0.43825	0.117865	-3.71823	0.000200622	0.0198601
ENSMUSG00000038384	208043	Setd1b	498.546	0.732971	0.197181	-3.71725	0.000201402	0.0198601
ENSMUSG00000056214	93737	Pard6g	144.116	-0.593612	0.159585	3.71973	0.000199438	0.0198601
ENSMUSG00000051855	17294	Mest	292.72	0.743673	0.200134	-3.71588	0.000202501	0.0198601
ENSMUSG00000058056	72333	Palld	3665.38	0.561226	0.151435	-3.70605	0.000210521	0.0204606
ENSMUSG00000034845	84094	Plvap	3539.42	-0.58239	0.157259	3.70339	0.000212738	0.0204606
ENSMUSG00000026638	54139	Irf6	552.655	-0.518559	0.140028	3.70325	0.000212852	0.0204606
ENSMUSG00000067430	73451	Zfp763	186.379	-0.631017	0.170523	3.70049	0.000215185	0.0205332
ENSMUSG00000020169	382427	Best3	172	0.646481	0.174941	-3.69542	0.000219521	0.0206905
ENSMUSG00000022912	19128	Pros1	1531.58	-0.414219	0.112432	3.68418	0.000229439	0.0210779
ENSMUSG00000020205	21664	Phlda1	162.201	0.738083	0.200313	-3.68464	0.000229027	0.0210779
ENSMUSG00000072972	11498	Adam4	34.0856	0.792647	0.214983	-3.68702	0.000226892	0.0210779
ENSMUSG00000030513	18553	Pcsk6	2402.35	-0.54325	0.147429	3.68482	0.000228861	0.0210779
ENSMUSG00000030161	57436	Gabarapl1	1926.49	-0.450343	0.122528	3.67542	0.000237455	0.0215416
ENSMUSG00000038173	320981	Enpp6	873.698	-0.536891	0.146195	3.67244	0.000240249	0.0215682
ENSMUSG00000008845	93671	Cd163	1298.93	-0.513401	0.139871	3.67053	0.000242046	0.0215682
ENSMUSG00000034040	212996	Wbscr17	103.434	0.644843	0.175908	-3.6658	0.000246568	0.0215682
ENSMUSG00000041445	105450	Mmrn2	3768.04	-0.515902	0.140649	3.66802	0.000244437	0.0215682
ENSMUSG00000002985	11816	Apoe	18360.9	-0.521841	0.142345	3.66604	0.000246337	0.0215682
ENSMUSG00000022822	27416	Abcc5	1507.97	0.446852	0.121901	-3.6657	0.000246664	0.0215682
ENSMUSG00000022983	224432	Scaf4	445.69	0.534022	0.145798	-3.66276	0.000249508	0.0216394
ENSMUSG00000030411	384569	Nova2	95.471	0.699878	0.19113	-3.66179	0.000250459	0.0216394
ENSMUSG00000037513	233033	Samd4b	641.864	0.539579	0.147469	-3.65894	0.000253263	0.0217522
ENSMUSG00000024678	66607	Ms4a4d	231.854	-0.587108	0.160533	3.65726	0.000254931	0.0217666
ENSMUSG00000025150	12409	Cbr2	523.626	-0.525989	0.144327	3.64442	0.000267996	0.0227483
ENSMUSG00000026234	17975	Ncl	3286.16	0.459508	0.126276	-3.63891	0.00027379	0.0229343
ENSMUSG00000079293	56644	Clec7a	53.5217	-0.756109	0.207815	3.63838	0.000274354	0.0229343
ENSMUSG00000054690	59308	Emcn	3055.95	-0.614895	0.169077	3.63677	0.000276078	0.0229343
ENSMUSG00000001918	20514	Slc1a5	996.688	-0.566591	0.155812	3.63637	0.000276508	0.0229343
ENSMUSG00000037206	26968	Islr	884.387	-0.510642	0.140602	3.63183	0.000281414	0.0230775
ENSMUSG00000048368	27047	Omd	65.8477	-0.774845	0.21329	3.63282	0.000280345	0.0230775
ENSMUSG00000051067	237403	Lingo3	66.618	0.764016	0.210785	-3.62462	0.000289391	0.0234665
ENSMUSG00000005360	20512	Slc1a3	154.349	-0.672119	0.185388	3.62547	0.000288435	0.0234665
ENSMUSG00000044583	170743	Tlr7	210.067	-0.607472	0.168221	3.61114	0.00030485	0.0241814
ENSMUSG00000020692	217011	Nle1	165.793	0.752141	0.208162	-3.61325	0.000302383	0.0241814
ENSMUSG00000021390	18295	Ogn	4188.78	-0.583187	0.161497	3.61113	0.00030487	0.0241814
ENSMUSG00000056423	224065	Uts2d	814.791	-0.531993	0.147398	3.60922	0.000307115	0.0242271
ENSMUSG00000028995	84652	Fam126a	2413.75	0.414916	0.115225	-3.60092	0.000317098	0.0248794
ENSMUSG00000024066	22436	Xdh	4078.93	-0.59281	0.164781	3.59756	0.000321215	0.0250669
ENSMUSG00000018796	14081	Acsl1	18090.4	-0.496956	0.138276	3.59394	0.00032572	0.025148
ENSMUSG00000021136	64075	Smoc1	1497.32	-0.583208	0.162625	3.58621	0.000335518	0.0254976
ENSMUSG00000005611	17540	Mrvi1	994.937	0.512622	0.14294	-3.58629	0.00033542	0.0254976
ENSMUSG00000019936	13516	Epyc	26.9075	-0.767029	0.213984	3.58452	0.000337701	0.0255036
ENSMUSG00000005718	83383	Tfap4	61.4924	-0.694828	0.194042	3.5808	0.000342539	0.0256286
ENSMUSG00000028369	64817	Svep1	3101.04	-0.676305	0.189251	3.57359	0.000352114	0.0262099
ENSMUSG00000053024	21367	Cntn2	480.103	-0.760614	0.213217	3.56733	0.000360639	0.0267076
ENSMUSG00000020044	21859	Timp3	23620.6	-0.545742	0.153043	3.56593	0.000362566	0.0267139
ENSMUSG00000043999	237716	Gpr75	48.1312	0.769015	0.215901	-3.56189	0.000368194	0.0268883
ENSMUSG00000003227	13608	Edar	179.687	-0.672739	0.188888	3.56157	0.000368638	0.0268883
ENSMUSG00000014498	237615	Ankrd52	1344.15	0.506868	0.142697	-3.55206	0.000382227	0.0274508
ENSMUSG00000001240	54409	Ramp2	1604.27	-0.631233	0.17771	3.55203	0.000382264	0.0274508
ENSMUSG00000020740	260302	Gga3	483.741	0.474305	0.133506	-3.55269	0.000381317	0.0274508
ENSMUSG00000061079	20841	Zfp143	590.987	-0.511793	0.14413	3.5509	0.000383915	0.0274508
ENSMUSG00000030214	66857	Plbd1	478.014	-0.4905	0.13965	3.51236	0.000444148	0.0313161
ENSMUSG00000006906	70527	Stambp	256.78	0.61405	0.174802	-3.51283	0.000443364	0.0313161
ENSMUSG00000050211	329502	Pla2g4e	1045.65	0.446406	0.127379	-3.50454	0.000457399	0.0319189
ENSMUSG00000062101	240120	Zfp119b	111.601	-0.642122	0.183387	3.50146	0.000462715	0.0321355
ENSMUSG00000000489	18591	Pdgfb	497.269	0.57173	0.163539	-3.49598	0.000472322	0.0324917
ENSMUSG00000004730	13733	Emr1	449.705	-0.452856	0.129499	3.497	0.000470522	0.0324917
ENSMUSG00000022949	209195	Clic6	39.3182	0.736296	0.210858	-3.49191	0.000479573	0.0328349
ENSMUSG00000022353	211401	Mtss1	1161.95	0.488253	0.13996	-3.48851	0.000485724	0.0329468
ENSMUSG00000068735	277414	Trp53i11	358.184	0.616074	0.176602	-3.4885	0.000485746	0.0329468
ENSMUSG00000023036	93717	Pcdhga9	176.012	0.543316	0.156115	-3.48022	0.000500998	0.0336666
ENSMUSG00000044006	68709	Cilp2	3641.88	-0.481242	0.138471	3.47541	0.000510074	0.033962
ENSMUSG00000042045	66402	Sln	38966.2	-0.350513	0.101066	3.46816	0.000524031	0.034732
ENSMUSG00000064363	17719	mt-Nd4	29211.4	0.659743	0.190545	-3.4624	0.000535385	0.0352684
ENSMUSG00000047686	213436	Zcchc5	93.5676	-0.682613	0.197616	3.45424	0.000551838	0.0360807
ENSMUSG00000034765	240672	Dusp5	155.859	0.577822	0.167492	-3.44984	0.000560917	0.0365099
ENSMUSG00000029478	20602	Ncor2	2084.88	0.546664	0.158711	-3.44439	0.000572348	0.0369304
ENSMUSG00000042390	229542	Gatad2b	388.046	0.518318	0.150484	-3.44433	0.000572466	0.0369304
ENSMUSG00000002028	214162	Mll1	3266.42	0.505713	0.146907	-3.44241	0.000576554	0.0370296
ENSMUSG00000075588	103889	Hoxb2	49.1674	-0.687511	0.200322	3.43203	0.00059909	0.0381394
ENSMUSG00000078651	237940	Aoc2	49.9857	0.674545	0.196502	-3.43277	0.000597455	0.0381394
ENSMUSG00000031517	234267	Gpm6a	2231.72	-0.605746	0.176783	3.42649	0.000611434	0.0387553
ENSMUSG00000034522	380912	Zfp395	243.712	0.659038	0.192845	-3.41744	0.000632119	0.0398922
ENSMUSG00000042846	216028	Lrrtm3	180.687	0.609708	0.178537	-3.41502	0.000637771	0.0400747
ENSMUSG00000025404	71750	R3hdm2	2183.74	0.586551	0.172142	-3.40736	0.000655936	0.0410384
ENSMUSG00000027868	21384	Tbx15	24.7583	-0.728269	0.214073	3.40197	0.000669021	0.0415663
ENSMUSG00000050705	69662	2310061I04Rik	388.621	0.592949	0.174577	-3.39649	0.000682561	0.042159
ENSMUSG00000086040	330319	Wipf3	1059.28	0.491564	0.145019	-3.38966	0.000699804	0.0430409
ENSMUSG00000051331	12288	Cacna1c	6161.67	0.485075	0.14334	-3.38408	0.000714163	0.0437387
ENSMUSG00000056220	18783	Pla2g4a	730.039	-0.552285	0.163475	3.37841	0.000729054	0.0442771
ENSMUSG00000024807	74126	Syvn1	522.349	0.500834	0.148428	-3.37426	0.000740134	0.0445769
ENSMUSG00000075031	319178	Hist1h2bb	40.8293	0.729047	0.216	-3.37522	0.000737567	0.0445769
ENSMUSG00000020810	114886	Cygb	1742.44	-0.439987	0.130486	3.37192	0.000746471	0.0447729
ENSMUSG00000056973	104158	Ces1d	8714.74	-0.494432	0.146847	3.36698	0.000759968	0.0450509
ENSMUSG00000031342	14758	Gpm6b	1790.36	-0.54418	0.161533	3.36884	0.000754856	0.0450509
ENSMUSG00000034724	231464	Cnot6l	1020.9	0.430216	0.127832	-3.36548	0.000764092	0.0450846
ENSMUSG00000032202	11891	Rab27a	296.06	-0.496564	0.147714	3.36165	0.000774771	0.0455296
ENSMUSG00000061436	15258	Hipk2	2219.65	0.594934	0.177102	-3.35927	0.000781484	0.0457389
ENSMUSG00000023036	93716	Pcdhga9	201.684	0.494371	0.147449	-3.35282	0.000799913	0.0466294
ENSMUSG00000091119	100039139	Ccdc152	57.169	-0.695979	0.207717	3.35061	0.000806345	0.0468164
ENSMUSG00000040613	11810	Apobec1	224.64	-0.576687	0.17232	3.34661	0.000818049	0.047119
ENSMUSG00000034687	231470	Fras1	3529.26	0.457675	0.136742	-3.347	0.000816903	0.047119
ENSMUSG00000041390	16543	Mdfic	535.612	-0.450223	0.134678	3.34297	0.000828883	0.0473213
ENSMUSG00000024993	67894	Fam45a	614.137	-0.45989	0.137648	3.34106	0.000834602	0.0473213
ENSMUSG00000016024	16803	Lbp	244.227	-0.548236	0.164056	3.34176	0.000832492	0.0473213
ENSMUSG00000025647	66940	Shisa5	1518.34	-0.44472	0.133181	3.33921	0.000840178	0.0474521
ENSMUSG00000042190	14747	Cmklr1	1184.07	-0.628641	0.18845	3.33586	0.00085037	0.0478257
ENSMUSG00000028773	14077	Fabp3	6655.46	-0.434098	0.130169	3.33487	0.000853382	0.0478257
ENSMUSG00000039087	68750	Rreb1	1649.39	0.57596	0.17283	-3.33252	0.000860631	0.0480464
ENSMUSG00000020038	12952	Cry1	544.453	-0.496849	0.149216	3.32974	0.000869271	0.0483428
ENSMUSG00000079057	102294	Cyp4v3	366.473	-0.551212	0.16587	3.32315	0.000890072	0.0488501
ENSMUSG00000052374	11472	Actn2	40802.2	0.480851	0.144713	-3.32278	0.000891252	0.0488501
ENSMUSG00000021699	100862401	Pde4d	70.4933	0.698839	0.210449	-3.32071	0.000897887	0.0489956
ENSMUSG00000090035	14426	Galnt4	382.206	-0.443322	0.13355	3.31951	0.000901759	0.0490226
ENSMUSG00000037847	225994	BC016495	107.937	0.551602	0.166469	-3.31354	0.000921231	0.0498943
ENSMUSG00000061689	228836	Dlgap4	836.086	0.50726	0.153148	-3.31222	0.000925595	0.0499443
ENSMUSG00000021903	78754	Galntl2	571.089	-0.571359	0.172764	3.30717	0.00094245	0.0506654
ENSMUSG00000028634	16656	Hivep3	93.811	0.650574	0.197271	-3.29786	0.000974233	0.0514218
ENSMUSG00000036968	66455	Cnpy4	293.688	-0.477541	0.144677	3.30073	0.000964342	0.0514218
ENSMUSG00000060591	80876	Ifitm2	1170.35	-0.521705	0.158189	3.29798	0.000973839	0.0514218
ENSMUSG00000026083	226982	Eif5b	1996.2	0.437686	0.132831	-3.29506	0.000984022	0.0515347
ENSMUSG00000021904	218877	Sema3g	571.715	-0.502711	0.152866	3.28859	0.00100692	0.0523138
ENSMUSG00000030757	210162	Zkscan2	98.7831	0.69651	0.211986	-3.28564	0.00101752	0.0525596
ENSMUSG00000036599	59031	Chst12	162.935	-0.529619	0.161599	3.27736	0.00104784	0.0535542
ENSMUSG00000042202	320541	Slc35e2	748.514	0.430718	0.131365	-3.27878	0.00104256	0.0535542
ENSMUSG00000004633	69993	Chn2	162.244	-0.526382	0.160579	3.27802	0.00104537	0.0535542
ENSMUSG00000086564	630146	Cd101	25.4238	0.706684	0.216072	-3.2706	0.00107321	0.0546585
ENSMUSG00000047658	545276	Gal3st3	116.672	0.700738	0.21453	-3.26639	0.00108927	0.0552822
ENSMUSG00000032633	216805	Flcn	1668.83	0.412988	0.126486	-3.26508	0.00109433	0.0553456
ENSMUSG00000075415	14269	Fnbp1	1373.8	0.507908	0.155753	-3.26099	0.00111024	0.0559554
ENSMUSG00000001741	16170	Il16	569.817	-0.44128	0.135449	3.25791	0.00112237	0.0563709
ENSMUSG00000036469	72925	March1	116.305	-0.592716	0.182563	3.24664	0.00116774	0.0580472
ENSMUSG00000051486	93882	Pcdhb11	76.2121	-0.67499	0.207867	3.24723	0.00116534	0.0580472
ENSMUSG00000045725	78004	Prr15	163.259	-0.504515	0.155345	3.24772	0.00116334	0.0580472
ENSMUSG00000018774	12514	Cd68	192.33	-0.518761	0.16004	3.24144	0.00118928	0.0589161
ENSMUSG00000034771	21886	Tle2	221.145	0.611449	0.188707	-3.2402	0.00119447	0.0589719
ENSMUSG00000038296	233733	Galntl4	417.136	0.462267	0.142881	-3.23533	0.00121502	0.059783
ENSMUSG00000039701	99526	Usp53	1038.73	-0.414272	0.128284	3.22934	0.00124074	0.0606377
ENSMUSG00000034463	219151	Scara3	297.811	-0.454907	0.140849	3.22975	0.00123898	0.0606377
ENSMUSG00000031327	12212	Chic1	239.89	-0.553677	0.171525	3.22798	0.0012467	0.0606901
ENSMUSG00000056851	18521	Pcbp2	1399.99	0.526282	0.163135	-3.22604	0.00125515	0.0607284
ENSMUSG00000062785	16504	Kcnc3	39.2417	0.693407	0.215341	-3.22004	0.00128173	0.0617468
ENSMUSG00000035545	232798	Leng8	2389.23	0.415071	0.128929	-3.21937	0.00128471	0.0617468
ENSMUSG00000027490	13555	E2f1	31.888	0.687238	0.213826	-3.214	0.00130898	0.0622069
ENSMUSG00000023328	11423	Ache	199.792	0.677418	0.21097	-3.21097	0.00132287	0.0622069
ENSMUSG00000007880	93760	Arid1a	2104.48	0.501621	0.156236	-3.21067	0.00132428	0.0622069
ENSMUSG00000025608	27205	Podxl	4662.38	-0.418094	0.13018	3.21165	0.00131974	0.0622069
ENSMUSG00000037406	330723	Htra4	557.682	-0.613303	0.190937	3.21207	0.00131782	0.0622069
ENSMUSG00000022095	239170	Fam160b2	680.291	0.581327	0.180932	-3.21295	0.00131378	0.0622069
ENSMUSG00000044042	14260	Fmn1	2102.03	0.528956	0.164889	-3.20795	0.00133683	0.0624241
ENSMUSG00000040734	333654	Ppp1r13l	708.023	0.619182	0.193023	-3.20781	0.00133751	0.0624241
ENSMUSG00000030865	70261	2010110P09Rik	77.8653	-0.622163	0.194189	3.2039	0.00135581	0.0628742
ENSMUSG00000040511	52118	Pvr	598.68	0.428584	0.133823	-3.20263	0.00136181	0.0629511
ENSMUSG00000049532	50524	Sall2	249.167	-0.444151	0.138734	3.20146	0.00136731	0.0630049
ENSMUSG00000022438	170736	Parvb	1357.34	0.543528	0.169995	-3.19732	0.00138712	0.063116
ENSMUSG00000040170	55990	Fmo2	3848.58	-0.580108	0.181398	3.19799	0.0013839	0.063116
ENSMUSG00000041975	228019	Mettl8	112.974	0.577426	0.180508	-3.1989	0.00137954	0.063116
ENSMUSG00000069833	66395	Ahnak	92463.3	-0.408818	0.127849	3.19767	0.00138542	0.063116
ENSMUSG00000037221	68929	Mospd3	52.2754	0.670647	0.210137	-3.19147	0.00141551	0.0642065
ENSMUSG00000042744	269700	Gm15800	3507.26	0.471698	0.147897	-3.18938	0.0014258	0.0644717
ENSMUSG00000025950	15926	Idh1	1688.38	-0.373358	0.117146	3.18712	0.00143696	0.0647749
ENSMUSG00000051149	11538	Adnp	2293.94	0.399987	0.125676	-3.18268	0.0014592	0.0655738
ENSMUSG00000022401	321003	Xpnpep3	323.952	0.430106	0.135222	-3.18075	0.00146892	0.0657919
ENSMUSG00000004891	18008	Nes	1912.73	0.591687	0.186166	-3.17828	0.00148152	0.0658048
ENSMUSG00000007279	56788	Scube2	48.3177	0.679516	0.213813	-3.17809	0.00148248	0.0658048
ENSMUSG00000024781	16889	Lipa	1562.01	-0.410179	0.129432	3.16907	0.0015293	0.0672659
ENSMUSG00000055782	26874	Abcd2	356.493	-0.4773	0.150565	3.17005	0.00152412	0.0672659
ENSMUSG00000052534	18514	Pbx1	1946.01	0.411306	0.129785	-3.16915	0.00152887	0.0672659
ENSMUSG00000050192	208691	Eif5a2	173.379	-0.526711	0.166299	3.16725	0.00153886	0.0674821
ENSMUSG00000024098	65960	Twsg1	3634.48	-0.358482	0.113248	3.16545	0.00154843	0.0676972
ENSMUSG00000022108	16432	Itm2b	16181	-0.345366	0.109145	3.16428	0.00155468	0.0677665
ENSMUSG00000089774	53881	Slc5a3	2925.21	0.682044	0.215961	-3.15818	0.0015876	0.068994
ENSMUSG00000024260	269003	Sap130	527.611	0.43672	0.138336	-3.15695	0.00159429	0.069078
ENSMUSG00000021876	58809	Rnase4	2014.03	-0.455034	0.144228	3.15496	0.00160523	0.0691844
ENSMUSG00000057530	230857	Ece1	6914.77	-0.521873	0.165476	3.15377	0.00161178	0.0692159
ENSMUSG00000029414	208628	Kntc1	24.9046	0.669912	0.212591	-3.15117	0.00162616	0.0692804
ENSMUSG00000032440	21813	Tgfbr2	3361.77	-0.352384	0.111865	3.15008	0.00163226	0.0692804
ENSMUSG00000028960	63958	Ube4b	1759.61	0.44852	0.142385	-3.15006	0.00163237	0.0692804
ENSMUSG00000024621	12978	Csf1r	2372.56	-0.453654	0.143978	3.15086	0.00162792	0.0692804
ENSMUSG00000010051	15586	Hyal1	295.214	-0.520071	0.165159	3.14892	0.00163877	0.069349
ENSMUSG00000022864	67102	D16Ertd472e	268.484	-0.432958	0.137561	3.14739	0.00164738	0.0695106
ENSMUSG00000049612	18377	Omg	36.6973	0.65175	0.20742	-3.14217	0.00167702	0.0705029
ENSMUSG00000007817	328365	Zmiz1	2187.85	0.438855	0.139731	-3.1407	0.00168544	0.0705029
ENSMUSG00000004896	229503	Rrnad1	270.937	0.459547	0.14632	-3.1407	0.00168546	0.0705029
ENSMUSG00000063952	268936	Brpf3	369.414	0.492734	0.157068	-3.13707	0.00170643	0.0709757
ENSMUSG00000046574	233210	Prr12	562.605	0.633368	0.201913	-3.13684	0.00170779	0.0709757
ENSMUSG00000028809	51796	Srrm1	1013.87	0.376077	0.119914	-3.13622	0.00171144	0.0709757
ENSMUSG00000038831	241308	Ralgps1	137.171	0.542488	0.173112	-3.13374	0.00172591	0.071372
ENSMUSG00000023092	14199	Fhl1	7176.64	-0.506763	0.161841	3.13123	0.00174075	0.071781
ENSMUSG00000056492	224792	Gpr116	7506.41	-0.385583	0.12325	3.12846	0.00175723	0.0722556
ENSMUSG00000040163	73344	1700034J05Rik	38.0601	0.645957	0.206549	-3.12738	0.00176373	0.0723177
ENSMUSG00000028273	56376	Pdlim5	20529.9	-0.392304	0.125562	3.12439	0.00178174	0.072646
ENSMUSG00000050840	23836	Cdh20	29.1338	0.666031	0.213143	-3.12481	0.00177921	0.072646
ENSMUSG00000045482	100683	Trrap	3304.85	0.39269	0.125798	-3.12158	0.00179884	0.0731377
ENSMUSG00000045932	15958	Ifit2	308.182	-0.485195	0.155477	3.12068	0.00180434	0.0731562
ENSMUSG00000032218	12442	Ccnb2	22.7104	0.650785	0.208669	-3.11874	0.00181624	0.0733586
ENSMUSG00000068566	50918	Myadm	3475.17	0.337498	0.108234	-3.11823	0.00181944	0.0733586
ENSMUSG00000071054	224903	Safb	1322.79	0.372883	0.119711	-3.11486	0.00184034	0.0739959
ENSMUSG00000036432	20439	Siah2	617.026	0.552128	0.177317	-3.11379	0.00184698	0.0740578
ENSMUSG00000067279	53412	Ppp1r3c	7669.18	0.472864	0.152015	-3.11064	0.00186683	0.0744425
ENSMUSG00000003178	194401	Mical3	1713.78	0.388832	0.124971	-3.11137	0.00186219	0.0744425
ENSMUSG00000005672	16590	Kit	158.221	0.593785	0.191041	-3.10815	0.0018826	0.0748657
ENSMUSG00000051790	216856	Nlgn2	361.885	0.544361	0.175555	-3.10081	0.00192995	0.0753043
ENSMUSG00000020721	78455	Helz	1390.64	0.399107	0.128709	-3.10085	0.00192966	0.0753043
ENSMUSG00000034981	231440	Parm1	2298.24	0.579001	0.186532	-3.10404	0.001909	0.0753043
ENSMUSG00000085795	353310	Zfp703	388.067	0.57827	0.186432	-3.10178	0.00192362	0.0753043
ENSMUSG00000021244	56531	Ylpm1	1314.04	0.415802	0.134043	-3.102	0.0019222	0.0753043
ENSMUSG00000038022	330323	Fam188b	294.185	-0.458761	0.147891	3.10202	0.00192207	0.0753043
ENSMUSG00000090946	72123	2010109K11Rik	593.123	-0.393672	0.126933	3.1014	0.00192605	0.0753043
ENSMUSG00000029864	76263	Gstk1	1779.15	-0.343542	0.11087	3.0986	0.00194435	0.075663
ENSMUSG00000024990	19662	Rbp4	63.5425	-0.639825	0.206772	3.09435	0.00197241	0.0760837
ENSMUSG00000041912	72634	Tdrkh	162.374	0.572359	0.185049	-3.09301	0.00198137	0.0760837
ENSMUSG00000024440	53601	Pcdh12	359.592	0.617041	0.199465	-3.09349	0.0019782	0.0760837
ENSMUSG00000018927	20305	Ccl6	625.709	-0.625543	0.202078	3.09555	0.00196445	0.0760837
ENSMUSG00000039782	231207	Cpeb2	1576.98	0.490987	0.158972	-3.08851	0.00201163	0.0770417
ENSMUSG00000021417	23986	Eci2	2429.42	-0.381257	0.123501	3.08709	0.00202127	0.0770665
ENSMUSG00000046139	225929	Patl1	854.109	0.40526	0.131286	-3.08685	0.0020229	0.0770665
ENSMUSG00000042423	14123	Fbrs	457.497	0.450167	0.146018	-3.08295	0.00204962	0.0778802
ENSMUSG00000047996	546336	Prrg1	486.206	-0.508027	0.164843	3.08188	0.00205697	0.077905
ENSMUSG00000034584	320051	Exph5	87.2142	-0.59442	0.192936	3.08092	0.00206359	0.077905
ENSMUSG00000035530	20918	Eif1	891.263	0.530257	0.172132	-3.08052	0.00206637	0.077905
ENSMUSG00000078716	242409	Tmem8b	721.512	0.472676	0.153635	-3.07662	0.00209364	0.0787283
ENSMUSG00000010066	56808	Cacna2d2	1209.35	0.493107	0.160395	-3.07433	0.00210976	0.0791297
ENSMUSG00000031627	16363	Irf2	365.967	0.440037	0.143206	-3.07276	0.00212086	0.0793409
ENSMUSG00000032602	57279	Slc25a20	1916.11	-0.447396	0.145684	3.07099	0.00213348	0.0794039
ENSMUSG00000071660	70387	Ttc9c	555.642	0.402274	0.130976	-3.07136	0.00213083	0.0794039
ENSMUSG00000024048	67268	Myl12a	1721.23	-0.48852	0.159136	3.06983	0.00214178	0.0795086
ENSMUSG00000023046	16012	Igfbp6	2602.09	-0.562023	0.183146	3.06871	0.00214983	0.0796041
ENSMUSG00000023224	12258	Serping1	8285.53	-0.518416	0.169056	3.06653	0.00216559	0.0799093
ENSMUSG00000058488	16591	Kl	31.5252	-0.654013	0.213308	3.06605	0.00216909	0.0799093
ENSMUSG00000020844	18230	Nxn	678.818	-0.43377	0.141528	3.0649	0.00217741	0.0800129
ENSMUSG00000025314	19271	Ptprj	675.845	-0.376084	0.12285	3.06133	0.00220359	0.0806169
ENSMUSG00000052676	215693	Zmat1	210.067	0.581215	0.190009	-3.05889	0.00222162	0.0806169
ENSMUSG00000030966	20821	Trim21	278.663	-0.45642	0.149182	3.05949	0.00221715	0.0806169
ENSMUSG00000024899	23972	Papss2	806.201	-0.415736	0.135819	3.06095	0.00220635	0.0806169
ENSMUSG00000005087	12505	Cd44	1069.71	0.369787	0.120867	-3.05947	0.00221732	0.0806169
ENSMUSG00000038002	57354	Cramp1l	761.489	0.401182	0.131214	-3.05745	0.00223228	0.0808018
ENSMUSG00000020261	215335	Slc36a1	422.654	0.489062	0.160198	-3.05285	0.00226678	0.0818464
ENSMUSG00000028167	69772	Bdh2	78.4288	-0.588257	0.19276	3.05176	0.00227505	0.0819028
ENSMUSG00000022074	21933	Tnfrsf10b	43.137	0.627973	0.205815	-3.05116	0.00227962	0.0819028
ENSMUSG00000070469	269959	Adamtsl3	621.593	-0.431612	0.141508	3.05008	0.00228778	0.0819928
ENSMUSG00000040675	270685	Mthfd1l	267.883	-0.547531	0.179587	3.04883	0.00229737	0.0821339
ENSMUSG00000040212	13732	Emp3	476.443	-0.421711	0.138428	3.04644	0.00231572	0.0825864
ENSMUSG00000015053	14461	Gata2	485.672	-0.495596	0.162773	3.0447	0.00232913	0.0828609
ENSMUSG00000063406	73130	Tmed5	981.243	-0.532846	0.175235	3.04076	0.00235981	0.0837473
ENSMUSG00000037143	78774	4930529M08Rik	84.536	0.570492	0.187955	-3.03527	0.00240324	0.0846675
ENSMUSG00000020230	15468	Prmt2	344.92	0.440857	0.145245	-3.03527	0.0024032	0.0846675
ENSMUSG00000022052	71978	Ppp2r2a	738.339	0.436831	0.143907	-3.03551	0.00240128	0.0846675
ENSMUSG00000033763	244654	Mtss1l	775.322	0.547038	0.180295	-3.03412	0.00241238	0.0846687
ENSMUSG00000054477	140492	Kcnn2	114.651	0.504163	0.166182	-3.0338	0.00241494	0.0846687
ENSMUSG00000051498	21899	Tlr6	69.0927	-0.565193	0.186522	3.03017	0.00244416	0.085027
ENSMUSG00000000787	13205	Ddx3x	8537.36	-0.53004	0.174916	3.03025	0.00244351	0.085027
ENSMUSG00000028820	71514	Sfpq	2882.44	0.40291	0.132926	-3.03109	0.00243671	0.085027
ENSMUSG00000039683	330222	Sdk1	126.525	-0.516533	0.170546	3.0287	0.00245609	0.0850839
ENSMUSG00000027820	17380	Mme	537.531	-0.557327	0.184062	3.02792	0.00246241	0.0850997
ENSMUSG00000021057	238276	Akap5	98.8903	0.648671	0.214294	-3.02702	0.00246978	0.0851518
ENSMUSG00000020599	19739	Rgs9	47.3066	0.651785	0.21571	-3.02159	0.00251454	0.0860814
ENSMUSG00000002944	12491	Cd36	28981.4	-0.380652	0.125956	3.02212	0.00251015	0.0860814
ENSMUSG00000037887	18218	Dusp8	861.039	0.463996	0.15356	-3.0216	0.0025144	0.0860814
ENSMUSG00000049939	192198	Lrrc4	85.8339	0.549416	0.182174	-3.01589	0.00256224	0.0873025
ENSMUSG00000036887	12259	C1qa	1270.85	-0.45071	0.149516	3.01446	0.00257437	0.0875104
ENSMUSG00000056529	19204	Ptafr	125.196	-0.595928	0.197885	3.01148	0.00259976	0.088167
ENSMUSG00000034275	235086	Igsf9b	722.408	0.564813	0.187875	-3.00633	0.00264423	0.0890509
ENSMUSG00000028068	404710	Iqgap3	63.7962	0.573426	0.190714	-3.00673	0.00264077	0.0890509
ENSMUSG00000021702	21828	Thbs4	100.041	0.644905	0.214425	-3.0076	0.00263321	0.0890509
ENSMUSG00000093425	20429	Shox2	25.2556	-0.648035	0.21579	3.00309	0.00267255	0.0895889
ENSMUSG00000027833	20429	Shox2	25.2556	-0.648035	0.21579	3.00309	0.00267255	0.0895889
ENSMUSG00000020330	15366	Hmmr	22.1921	0.610523	0.203296	-3.00313	0.00267219	0.0895889
ENSMUSG00000023994	18044	Nfya	596.858	0.401879	0.133862	-3.00219	0.00268048	0.0896478
ENSMUSG00000027894	229706	Slc6a17	286.693	0.621008	0.20692	-3.0012	0.0026892	0.0897329
ENSMUSG00000040631	114255	Dok4	370.397	0.467106	0.155718	-2.99969	0.00270259	0.0897667
ENSMUSG00000021957	21881	Tkt	814.353	-0.384491	0.128173	2.99978	0.00270174	0.0897667
ENSMUSG00000029158	75581	Yipf7	1401.18	-0.35985	0.120086	2.99659	0.00273015	0.0904753
ENSMUSG00000034868	67938	Myl12b	1597.18	-0.410652	0.137208	2.9929	0.00276337	0.0913676
ENSMUSG00000063455	330286	D630045J12Rik	146.792	0.59423	0.198694	-2.99067	0.00278362	0.0918277
ENSMUSG00000042246	209760	Tmc7	164.838	0.493662	0.165338	-2.98577	0.0028287	0.0928926
ENSMUSG00000031520	22341	Vegfc	171.074	-0.481939	0.161591	2.98247	0.00285933	0.0933289
ENSMUSG00000074643	266692	Cpne1	1182.49	-0.402669	0.135021	2.98226	0.00286127	0.0933289
ENSMUSG00000021112	56217	Mpp5	2485.57	-0.40784	0.136714	2.98316	0.00285289	0.0933289
ENSMUSG00000039361	233489	Picalm	7847.35	-0.53444	0.179649	2.97491	0.00293078	0.0939078
ENSMUSG00000004508	14389	Gab2	1875.7	-0.403988	0.135777	2.97538	0.00292624	0.0939078
ENSMUSG00000046807	192734	AI646023	132.559	0.558231	0.187439	-2.9782	0.00289945	0.0939078
ENSMUSG00000040998	114249	Npnt	67.1053	-0.632286	0.212426	2.9765	0.00291563	0.0939078
ENSMUSG00000022947	109857	Cbr3	74.6297	-0.556063	0.186864	2.97576	0.00292262	0.0939078
ENSMUSG00000039577	260305	Nphp4	70.3968	0.600509	0.201659	-2.97784	0.00290285	0.0939078
ENSMUSG00000024589	83814	Nedd4l	1894.24	0.385213	0.129393	-2.97708	0.00291011	0.0939078
ENSMUSG00000041828	217258	Abca8a	7284.06	-0.404101	0.135925	2.97297	0.00294936	0.0942952
ENSMUSG00000045328	229841	Cenpe	52.2113	0.623581	0.209874	-2.97121	0.00296626	0.0944194
ENSMUSG00000047123	106759	Ticam1	344.886	0.430537	0.145004	-2.96913	0.00298641	0.0944395
ENSMUSG00000032232	68178	Cgnl1	8371.48	-0.417215	0.140497	2.96956	0.00298231	0.0944395
ENSMUSG00000029714	57330	Gigyf1	932.648	0.531074	0.178801	-2.9702	0.00297607	0.0944395
ENSMUSG00000030157	93694	Clec2d	1573.44	-0.442894	0.149241	2.96764	0.00300091	0.0945235
ENSMUSG00000023015	26934	Racgap1	45.4265	0.629924	0.21232	-2.96686	0.0030086	0.0945235
ENSMUSG00000042203	381085	Tbc1d22b	337.896	0.392009	0.132469	-2.95925	0.00308388	0.0966793
ENSMUSG00000027642	20014	Rpn2	2880.99	-0.339374	0.114769	2.95703	0.0031062	0.0971692
ENSMUSG00000038633	13244	Degs1	2980.53	-0.405875	0.137353	2.95498	0.00312688	0.0971879
ENSMUSG00000034462	18764	Pkd2	1667.89	-0.420542	0.142296	2.95541	0.00312257	0.0971879
ENSMUSG00000000085	29871	Scmh1	673.398	0.369199	0.125027	-2.95296	0.00314741	0.0974653
ENSMUSG00000032097	13209	Ddx6	4944.59	0.381087	0.12906	-2.95278	0.00314924	0.0974653
ENSMUSG00000020886	13385	Dlg4	194.962	0.462945	0.156842	-2.95167	0.00316062	0.0976093
ENSMUSG00000038375	68728	Trp53inp2	10560.6	0.368796	0.124981	-2.95082	0.00316932	0.0976703
ENSMUSG00000032062	66952	2310030G06Rik	143.1	-0.520278	0.17651	2.94758	0.00320271	0.0980747
ENSMUSG00000046982	110796	Tshz1	1937.31	-0.357845	0.121377	2.94821	0.00319617	0.0980747
ENSMUSG00000039497	212898	Dse	766.623	-0.416464	0.141321	2.94693	0.00320949	0.0980752
ENSMUSG00000023036	93708	Pcdhga9	54.1622	0.592559	0.201126	-2.94621	0.00321696	0.0980971
ENSMUSG00000002771	14814	Grin2d	34.6859	0.6328	0.21494	-2.94408	0.00323914	0.0985663
ENSMUSG00000032481	20588	Smarcc1	955.669	0.393053	0.13367	-2.94047	0.00327712	0.0993057
ENSMUSG00000025880	17131	Smad7	1416.94	0.471244	0.160329	-2.93924	0.00329023	0.0994952
ENSMUSG00000022261	15529	Sdc2	1955.38	-0.381705	0.130042	2.93525	0.00333277	0.0999829
ENSMUSG00000025241	17281	Fyco1	13906.6	0.400259	0.136349	-2.93554	0.00332966	0.0999829
ENSMUSG00000037788	232023	Vopp1	980.976	-0.336692	0.114711	2.93515	0.00333391	0.0999829
ENSMUSG00000031374	22754	Zfp92	17.5095	0.630763	0.214802	-2.93649	0.00331954	0.0999829
ENSMUSG00000071659	68693	Hnrnpul2	2928.14	0.334661	0.114117	-2.9326	0.00336131	0.100597
ENSMUSG00000023036	93724	Pcdhga9	313.758	0.455016	0.155194	-2.93192	0.00336874	0.100612
ENSMUSG00000019872	57319	Smpdl3a	1624.54	-0.379462	0.129554	2.92898	0.00340071	0.101358
ENSMUSG00000024664	60527	Fads3	1745.36	-0.388057	0.132636	2.92572	0.00343657	0.102217
ENSMUSG00000052229	574402	Gpr17	724.909	0.543329	0.18587	-2.92317	0.00346492	0.102849
ENSMUSG00000039004	12161	Bmp6	956.74	-0.561217	0.192142	2.92085	0.00349077	0.103195
ENSMUSG00000022364	210544	Wdr67	198.688	0.471161	0.161589	-2.9158	0.00354778	0.10408
ENSMUSG00000062980	214642	A430107O13Rik	2525.55	-0.344714	0.118176	2.91695	0.00353473	0.10408
ENSMUSG00000027663	22401	Zmat3	506.394	0.437169	0.149881	-2.91678	0.00353668	0.10408
ENSMUSG00000055322	21961	Tns1	32722.6	0.413636	0.142288	-2.90703	0.00364877	0.104924
ENSMUSG00000030393	22775	Zik1	152.868	-0.480658	0.165352	2.90689	0.00365047	0.104924
ENSMUSG00000020733	26941	Slc9a3r1	303.304	-0.437483	0.150373	2.90931	0.00362222	0.104924
ENSMUSG00000028488	20404	Sh3gl2	26.0709	0.620359	0.213304	-2.90833	0.00363362	0.104924
ENSMUSG00000025969	18187	Nrp2	1678.34	0.349953	0.120385	-2.90694	0.00364978	0.104924
ENSMUSG00000036880	52538	Acaa2	15400.3	-0.356496	0.122532	2.90943	0.00362092	0.104924
ENSMUSG00000021693	16563	Kif2a	603.098	0.415644	0.142786	-2.91095	0.00360331	0.104924
ENSMUSG00000021356	16364	Irf4	68.6274	-0.56914	0.19572	2.90794	0.00363824	0.104924
ENSMUSG00000060703	66205	Cd302	449.092	-0.468307	0.161312	2.90311	0.00369482	0.104952
ENSMUSG00000028426	19359	Rad23b	3026.84	-0.306196	0.105445	2.90386	0.00368599	0.104952
ENSMUSG00000090210	213119	Itga10	35.4012	0.609416	0.209896	-2.90341	0.00369122	0.104952
ENSMUSG00000024900	12894	Cpt1a	1694.35	-0.532411	0.183227	2.90575	0.00366379	0.104952
ENSMUSG00000022122	13618	Ednrb	1022.98	-0.464736	0.160005	2.9045	0.00367838	0.104952
ENSMUSG00000071847	494504	Apcdd1	177.318	-0.495299	0.170607	2.90316	0.0036942	0.104952
ENSMUSG00000046275	237858	Tusc5	79.4173	-0.574734	0.198156	2.90042	0.00372668	0.10565
ENSMUSG00000053279	11668	Aldh1a1	1314.84	-0.563801	0.194434	2.89971	0.0037351	0.105682
ENSMUSG00000022020	66897	Naa16	270.257	0.449241	0.154985	-2.89861	0.00374819	0.105846
ENSMUSG00000025377	78777	2410002I01Rik	257.24	0.464185	0.160208	-2.89738	0.00376288	0.106055
ENSMUSG00000004263	13498	Atn1	437.088	0.585867	0.202343	-2.89542	0.0037865	0.106514
ENSMUSG00000029103	16976	Lrpap1	2322.11	-0.329174	0.113737	2.89417	0.00380166	0.106733
ENSMUSG00000026116	56030	Tmem131	2122.9	0.355331	0.122898	-2.89126	0.00383699	0.106796
ENSMUSG00000026098	227099	Pms1	516.471	-0.387392	0.133991	2.89118	0.00383799	0.106796
ENSMUSG00000040848	108735	Sft2d2	2202.89	-0.343135	0.118607	2.89305	0.00381524	0.106796
ENSMUSG00000039852	68703	Rere	1897.57	0.456519	0.157913	-2.89096	0.0038407	0.106796
ENSMUSG00000043664	434325	Tmem221	111.371	-0.61883	0.214113	2.8902	0.00384999	0.10685
ENSMUSG00000001349	12797	Cnn1	112.371	-0.617749	0.213965	2.88715	0.00388743	0.10764
ENSMUSG00000032010	53376	Usp2	2943.96	0.323979	0.112256	-2.88608	0.00390071	0.10764
ENSMUSG00000020439	29856	Smtn	3619.99	0.380572	0.131851	-2.88638	0.00389696	0.10764
ENSMUSG00000030677	110033	Kif22	34.7904	0.604898	0.209828	-2.88282	0.00394128	0.107736
ENSMUSG00000033502	229776	Cdc14a	427.613	-0.450954	0.156365	2.88399	0.00392672	0.107736
ENSMUSG00000028807	73680	Zbtb8a	221.244	-0.429309	0.148892	2.88335	0.0039347	0.107736
ENSMUSG00000032815	14087	Fanca	35.8086	0.610774	0.211706	-2.88501	0.00391404	0.107736
ENSMUSG00000004655	11826	Aqp1	8744.06	-0.418984	0.145311	2.88335	0.00393465	0.107736
ENSMUSG00000032113	12649	Chek1	24.5068	0.622057	0.216041	-2.87935	0.00398492	0.10852
ENSMUSG00000079017	76933	Ifi27l2a	335.948	-0.597455	0.207859	2.87432	0.00404899	0.109144
ENSMUSG00000002831	57435	Plin4	13152.8	-0.48102	0.167339	2.87452	0.00404641	0.109144
ENSMUSG00000052566	170833	Hook2	113.655	0.531359	0.184762	-2.87591	0.00402863	0.109144
ENSMUSG00000052726	240776	Kcnt2	1676.33	-0.397817	0.138341	2.87564	0.00403213	0.109144
ENSMUSG00000046794	244416	Ppp1r3b	992.25	0.458297	0.159463	-2.87401	0.00405296	0.109144
ENSMUSG00000048376	14062	F2r	3184.34	-0.432429	0.150401	2.87517	0.00403809	0.109144
ENSMUSG00000023913	27226	Pla2g7	1974.04	-0.432371	0.150607	2.87086	0.00409359	0.110034
ENSMUSG00000068663	74374	Clec16a	1816.43	0.459113	0.160253	-2.86492	0.00417108	0.111293
ENSMUSG00000044172	68509	Ptx4	45.8263	-0.594715	0.207877	2.8609	0.00422438	0.112302
ENSMUSG00000074971	67606	Fibin	432.076	-0.519215	0.181712	2.85734	0.00427201	0.113361
ENSMUSG00000022867	30940	Usp25	5434.88	-0.306761	0.107413	2.85591	0.00429133	0.113536
ENSMUSG00000047298	240595	Kcnv2	452.002	-0.421913	0.147745	2.8557	0.00429427	0.113536
ENSMUSG00000003541	15937	Ier3	592.753	0.480845	0.16848	-2.85401	0.00431707	0.113721
ENSMUSG00000026814	13805	Eng	7926.69	-0.460109	0.161192	2.85442	0.00431159	0.113721
ENSMUSG00000028389	22696	Zfp37	210.492	-0.516326	0.18099	2.85279	0.00433375	0.113751
ENSMUSG00000028854	20544	Slc9a1	560.129	0.492927	0.172855	-2.85169	0.00434878	0.11394
ENSMUSG00000038702	319901	Dsel	845.993	-0.45502	0.16005	2.84298	0.00446933	0.116082
ENSMUSG00000032186	50876	Tmod2	945.728	-0.396729	0.139607	2.84176	0.00448653	0.116082
ENSMUSG00000055675	74901	Kbtbd11	193.199	-0.514243	0.180904	2.84263	0.00447435	0.116082
ENSMUSG00000051242	93880	Pcdhb9	29.3674	-0.612831	0.215625	2.84211	0.00448159	0.116082
ENSMUSG00000037362	18133	Nov	141.415	-0.510332	0.179765	2.83889	0.00452707	0.116922
ENSMUSG00000059149	213006	Mfsd4	553.355	0.38284	0.135102	-2.83372	0.00460092	0.118619
ENSMUSG00000031996	11804	Aplp2	11784.4	-0.338919	0.119655	2.83247	0.00461903	0.118874
ENSMUSG00000002804	66174	Nudt14	68.1138	0.539603	0.190576	-2.83143	0.00463411	0.119051
ENSMUSG00000021287	74335	Xrcc3	216.348	0.445512	0.157542	-2.82789	0.00468566	0.119951
ENSMUSG00000031637	67620	Lrp2bp	59.8656	0.603437	0.213504	-2.82635	0.00470819	0.120104
ENSMUSG00000039157	98952	Fam102a	242.485	0.469699	0.166158	-2.82682	0.00470129	0.120104
ENSMUSG00000050103	319660	Agmo	267.701	-0.460546	0.16311	2.82353	0.00474987	0.120955
ENSMUSG00000001441	19155	Npepps	2376.45	0.372291	0.131998	-2.82044	0.00479584	0.121699
ENSMUSG00000029648	14254	Flt1	4233.85	-0.420364	0.14903	2.82066	0.00479244	0.121699
ENSMUSG00000029096	78558	Htra3	3968.93	-0.390809	0.138635	2.81898	0.00481771	0.121828
ENSMUSG00000054428	11983	Atpif1	1931.22	0.374435	0.132823	-2.81905	0.00481664	0.121828
ENSMUSG00000041115	245666	Iqsec2	866.95	0.525711	0.186752	-2.81503	0.0048773	0.12312
ENSMUSG00000034066	227377	Farp2	516.077	0.40729	0.144824	-2.81231	0.00491871	0.123901
ENSMUSG00000055172	50909	C1ra	607.908	-0.53631	0.190806	2.81075	0.00494258	0.12412
ENSMUSG00000043557	74762	Mdga1	393.248	0.472403	0.16823	-2.80808	0.00498379	0.12458
ENSMUSG00000003617	12870	Cp	7025.08	-0.43812	0.15601	2.80828	0.00498073	0.12458
ENSMUSG00000032308	71742	Ulk3	171.703	0.506976	0.180769	-2.80456	0.00503852	0.125016
ENSMUSG00000016239	74365	Lonrf3	231.024	-0.540696	0.192775	2.8048	0.00503482	0.125016
ENSMUSG00000026872	24136	Zeb2	4793.32	-0.304799	0.108661	2.80505	0.00503085	0.125016
ENSMUSG00000067071	55927	Hes6	260.76	0.522009	0.18629	-2.80213	0.00507661	0.125422
ENSMUSG00000046318	320924	Ccbe1	291.447	-0.433687	0.154757	2.80236	0.00507296	0.125422
ENSMUSG00000055799	21415	Tcf7l1	145.876	0.516864	0.184471	-2.80186	0.00508082	0.125422
ENSMUSG00000032254	71819	Kif23	49.9858	0.583599	0.208517	-2.7988	0.00512923	0.126188
ENSMUSG00000041995	72114	Zbed3	197.626	0.489969	0.175047	-2.79907	0.00512502	0.126188
ENSMUSG00000009741	22221	Ubp1	1252.65	0.324038	0.115804	-2.79816	0.0051395	0.126226
ENSMUSG00000075273	72421	Ttc30b	646.112	-0.403531	0.144266	2.79713	0.00515587	0.126415
ENSMUSG00000068740	53883	Celsr2	455.945	0.489851	0.175314	-2.79414	0.00520386	0.127376
ENSMUSG00000014837	74356	4931428F04Rik	39.257	0.590726	0.211718	-2.79015	0.00526829	0.128736
ENSMUSG00000040761	56381	Spen	1742.88	0.453934	0.162755	-2.78907	0.00528601	0.128952
ENSMUSG00000023991	74123	Foxp4	376.813	0.483695	0.173577	-2.78664	0.00532584	0.129706
ENSMUSG00000055024	328572	Ep300	2394.71	0.410734	0.147462	-2.78536	0.0053468	0.129998
ENSMUSG00000046818	73284	Ddit4l	105.396	0.56688	0.203585	-2.78448	0.00536131	0.130049
ENSMUSG00000038020	268480	Rapgefl1	82.1102	0.518862	0.186399	-2.78361	0.0053758	0.130049
ENSMUSG00000021756	16195	Il6st	14068.1	-0.333013	0.119624	2.78382	0.00537223	0.130049
ENSMUSG00000020009	15979	Ifngr1	2031.33	-0.414436	0.148948	2.78243	0.00539539	0.130306
ENSMUSG00000028977	69743	Casz1	1386.81	0.476034	0.171121	-2.78185	0.00540496	0.130321
ENSMUSG00000030095	74122	Tmem43	860.586	-0.342517	0.123198	2.78021	0.00543246	0.130766
ENSMUSG00000024972	56072	Lgals12	22.4104	-0.58887	0.21191	2.77887	0.00545485	0.131088
ENSMUSG00000042870	21968	Tom1	80.5857	0.53553	0.192814	-2.77745	0.00547874	0.131444
ENSMUSG00000037827	21968	Gm5884	80.5857	0.53553	0.192814	-2.77745	0.00547874	0.131444
ENSMUSG00000042351	17444	Grap2	18.421	0.589772	0.21241	-2.77657	0.00549352	0.131581
ENSMUSG00000054013	104885	Tmem179	50.8415	0.592465	0.213504	-2.77495	0.00552094	0.13202
ENSMUSG00000047888	213988	Tnrc6b	5433.67	0.363564	0.131157	-2.77197	0.00557184	0.132908
ENSMUSG00000045659	233765	Plekha7	1529.89	0.387375	0.139799	-2.77095	0.0055893	0.132998
ENSMUSG00000024985	21416	Tcf7l2	329.876	0.455055	0.164464	-2.7669	0.00565929	0.133442
ENSMUSG00000018574	11370	Acadvl	14960.2	-0.371465	0.134264	2.76668	0.00566311	0.133442
ENSMUSG00000020021	13998	Fgd6	762.636	0.350881	0.126777	-2.76769	0.00564543	0.133442
ENSMUSG00000058806	12817	Col13a1	62.6388	0.568519	0.205404	-2.7678	0.00564355	0.133442
ENSMUSG00000001225	13487	Slc26a3	347.062	-0.499686	0.180461	2.76894	0.00562397	0.133442
ENSMUSG00000042359	99031	Osbpl6	1229.96	0.365715	0.132102	-2.76843	0.00563273	0.133442
ENSMUSG00000031805	16453	Jak3	385.207	0.478729	0.173127	-2.76519	0.00568903	0.133452
ENSMUSG00000035863	18483	Palm	2420.99	-0.393654	0.142367	2.76507	0.00569114	0.133452
ENSMUSG00000041498	381293	Kif14	14.8341	0.579063	0.209415	-2.76515	0.0056897	0.133452
ENSMUSG00000011256	11492	Adam19	2391.94	0.495528	0.179293	-2.76379	0.00571337	0.13371
ENSMUSG00000024617	12322	Camk2a	731.725	0.504403	0.182531	-2.76338	0.00572057	0.13371
ENSMUSG00000024935	20510	Slc1a1	116.529	-0.479455	0.173538	2.76283	0.00573031	0.133723
ENSMUSG00000028266	16911	Lmo4	721.32	-0.359103	0.130077	2.7607	0.00576779	0.134381
ENSMUSG00000022053	13592	Ebf2	376.409	-0.395155	0.143192	2.75962	0.00578683	0.134609
ENSMUSG00000001768	74030	Rin2	1899.44	-0.331881	0.12042	2.75602	0.00585089	0.135336
ENSMUSG00000022793	56375	B4galt4	396.969	-0.375833	0.136408	2.75521	0.00586541	0.135336
ENSMUSG00000035852	78906	9130017N09Rik	27.1245	0.594189	0.215671	-2.75507	0.00586791	0.135336
ENSMUSG00000073207	434778	Ccdc160	15.1115	-0.585879	0.212482	2.75731	0.00582798	0.135336
ENSMUSG00000048065	320635	Cyb5r2	219.265	0.458825	0.166559	-2.75473	0.00587405	0.135336
ENSMUSG00000058498	433809	Rnf207	1593.94	0.377143	0.136839	-2.7561	0.00584956	0.135336
ENSMUSG00000031748	14681	Gnao1	2513.51	0.408165	0.148217	-2.75384	0.00589007	0.13549
ENSMUSG00000027171	228413	Prrg4	57.597	-0.547484	0.198986	2.75136	0.00593477	0.136302
ENSMUSG00000038204	117590	Asb10	958.458	0.441299	0.160468	-2.75007	0.00595831	0.136627
ENSMUSG00000037991	223970	A630055G03Rik	15.894	0.579077	0.210637	-2.74917	0.00597465	0.136786
ENSMUSG00000076433	58251	BC100451	99.6594	0.483443	0.175983	-2.7471	0.0060124	0.137217
ENSMUSG00000016918	240725	Sulf1	4364.92	-0.426693	0.155425	2.74532	0.00604515	0.137705
ENSMUSG00000073530	23850	Pappa2	59.4448	-0.57953	0.211129	2.74491	0.00605278	0.137705
ENSMUSG00000038738	243961	Shank1	93.195	0.513138	0.187135	-2.74207	0.00610527	0.138682
ENSMUSG00000063382	80288	Bcl9l	850.683	0.480178	0.175253	-2.73991	0.00614563	0.139294
ENSMUSG00000036913	330863	Trim67	820.985	0.527806	0.192702	-2.73897	0.00616315	0.139294
ENSMUSG00000053898	51798	Ech1	6937.86	-0.341047	0.124534	2.73858	0.00617057	0.139294
ENSMUSG00000060913	381485	Trim55	2195.15	0.373395	0.13632	-2.73911	0.00616062	0.139294
ENSMUSG00000007080	18973	Pole	117.31	0.538775	0.196936	-2.73579	0.00622313	0.140262
ENSMUSG00000024803	107765	Ankrd1	79382.3	-0.398712	0.145887	2.73301	0.00627579	0.140793
ENSMUSG00000038369	56406	Ncoa6	903.438	0.368309	0.134747	-2.73335	0.00626946	0.140793
ENSMUSG00000041164	52915	Zmiz2	709.709	0.473055	0.173132	-2.73234	0.00628868	0.140864
ENSMUSG00000048960	109294	Prex2	3902.11	-0.334048	0.122311	2.73113	0.00631183	0.141165
ENSMUSG00000026991	227937	Pkp4	5029.31	-0.334447	0.122633	2.72723	0.0063868	0.142433
ENSMUSG00000051098	72852	Mblac2	106.89	0.541748	0.198649	-2.72716	0.00638816	0.142433
ENSMUSG00000028223	67460	Decr1	5758.19	-0.349857	0.128341	2.72599	0.00641086	0.14272
ENSMUSG00000027075	72401	Slc43a1	181.329	-0.536121	0.197039	2.72089	0.00651073	0.144722
ENSMUSG00000046959	231583	Slc26a1	95.4235	0.505943	0.186134	-2.71817	0.00656432	0.14569
ENSMUSG00000051586	100505050	Mical3	2329.71	0.409326	0.15075	-2.71526	0.00662239	0.146754
ENSMUSG00000024393	53761	Prrc2a	5269.65	0.416844	0.153583	-2.71413	0.00664501	0.146807
ENSMUSG00000068966	241311	Zbtb34	276.31	0.411621	0.151638	-2.7145	0.00663761	0.146807
ENSMUSG00000020889	217166	Nr1d1	1471.57	0.416129	0.15355	-2.71005	0.00672735	0.147951
ENSMUSG00000024426	73242	Atat1	108.052	0.489055	0.180455	-2.71012	0.00672588	0.147951
ENSMUSG00000051375	75599	Pcdh1	519.236	0.409988	0.151252	-2.71063	0.0067156	0.147951
ENSMUSG00000028348	68016	Murc	1586.63	-0.418284	0.154417	2.70879	0.00675295	0.148285
ENSMUSG00000039109	74145	F13a1	3842.1	-0.412355	0.152256	2.70829	0.00676299	0.148285
ENSMUSG00000000266	23947	Mid2	862.766	0.332823	0.122965	-2.70663	0.0067969	0.148804
ENSMUSG00000029328	50926	Hnrpdl	1996.22	-0.387891	0.143465	2.70374	0.00685648	0.149882
ENSMUSG00000030579	22177	Tyrobp	240.235	-0.385699	0.142863	2.69978	0.00693848	0.151447
ENSMUSG00000032350	14629	Gclc	697.112	-0.494365	0.183237	2.69796	0.00697661	0.15205
ENSMUSG00000039523	230967	BC046331	1101.32	0.420515	0.156065	-2.69449	0.00704957	0.15318
ENSMUSG00000036086	226409	Zranb3	193.286	0.425988	0.158202	-2.69269	0.0070878	0.153551
ENSMUSG00000028521	242585	Slc35d1	170.461	0.469185	0.17422	-2.69307	0.00707976	0.153551
ENSMUSG00000030747	67800	Dgat2	1979.3	-0.436341	0.162459	2.68585	0.00723449	0.154843
ENSMUSG00000020300	67579	Cpeb4	1213.5	0.346887	0.129003	-2.68899	0.00716685	0.154843
ENSMUSG00000074785	54712	Plxnc1	1125.79	-0.363879	0.135526	2.68495	0.00725408	0.154843
ENSMUSG00000024395	225341	Lims2	3385.14	-0.427044	0.158899	2.68752	0.00719851	0.154843
ENSMUSG00000074305	244895	C230081A13Rik	2397.3	0.366114	0.136221	-2.68764	0.00719584	0.154843
ENSMUSG00000033684	104009	Qsox1	2213.64	-0.402604	0.149934	2.68521	0.00724839	0.154843
ENSMUSG00000043631	407800	Ecm2	1117.04	-0.378964	0.141092	2.68593	0.00723293	0.154843
ENSMUSG00000025789	20450	St8sia2	24.0838	0.546227	0.203163	-2.68862	0.00717488	0.154843
ENSMUSG00000019256	11622	Ahr	252.51	-0.438322	0.163135	2.68686	0.00721277	0.154843
ENSMUSG00000071722	270624	Spin4	112.029	-0.453375	0.168928	2.68383	0.00727844	0.155072
ENSMUSG00000026361	214498	Cdc73	687.541	0.377484	0.140692	-2.68305	0.00729539	0.155072
ENSMUSG00000021221	70127	Dpf3	377.767	0.40138	0.149628	-2.68253	0.00730685	0.155072
ENSMUSG00000022479	22337	Vdr	61.4949	0.5227	0.194914	-2.6817	0.00732489	0.155213
ENSMUSG00000031453	19414	Rasa3	1841.47	-0.313271	0.116881	2.68025	0.00735668	0.155433
ENSMUSG00000029919	54486	Hpgds	131.582	-0.479319	0.178831	2.68029	0.00735585	0.155433
ENSMUSG00000079833	245269	E130304F04Rik	182.638	-0.441004	0.164845	2.67526	0.0074671	0.156625
ENSMUSG00000079302	245269	E130304F04Rik	182.638	-0.441004	0.164845	2.67526	0.0074671	0.156625
ENSMUSG00000023886	64074	Smoc2	1385.72	-0.502375	0.187759	2.67564	0.00745876	0.156625
ENSMUSG00000024855	107975	Pacs1	656.348	0.470057	0.175676	-2.6757	0.00745732	0.156625
ENSMUSG00000036896	12262	C1qc	929.769	-0.401531	0.150213	2.67308	0.00751592	0.156969
ENSMUSG00000025184	52013	D19Ertd386e	952.187	-0.343236	0.128438	2.6724	0.00753108	0.15706
ENSMUSG00000018559	67181	Ctdnep1	857.589	0.394381	0.147679	-2.67053	0.00757315	0.157543
ENSMUSG00000027800	17112	Tm4sf1	3816.06	-0.421431	0.157815	2.67041	0.00757598	0.157543
ENSMUSG00000022516	66911	Nudt16l1	222.405	0.38696	0.145057	-2.66765	0.00763848	0.158389
ENSMUSG00000040747	12508	Cd53	194.7	-0.475034	0.178279	2.66456	0.00770898	0.159623
ENSMUSG00000027217	241556	Tspan18	546.427	0.467957	0.175909	-2.66023	0.00780882	0.161038
ENSMUSG00000069920	97440	B3gnt9-ps	222.209	-0.422996	0.159012	2.66015	0.00781061	0.161038
ENSMUSG00000079037	19122	Prnp	3605.99	-0.272722	0.10252	2.66018	0.00780987	0.161038
ENSMUSG00000029070	74761	Mxra8	1011.71	-0.370507	0.139317	2.65946	0.00782664	0.16114
ENSMUSG00000027230	26427	Creb3l1	151.168	0.464873	0.175009	-2.65627	0.00790093	0.162209
ENSMUSG00000031673	12552	Cdh11	1714.79	-0.380052	0.143068	2.65645	0.00789689	0.162209
ENSMUSG00000045751	212377	Mms22l	62.4185	0.523467	0.197154	-2.65511	0.00792816	0.162538
ENSMUSG00000054509	328417	Parp4	1315.47	0.410861	0.154945	-2.65166	0.00800978	0.16398
ENSMUSG00000031320	20102	Rps4x	557.207	-0.376021	0.141994	2.64815	0.00809329	0.164572
ENSMUSG00000029102	54426	Hgfac	23.1959	0.571404	0.215772	-2.64819	0.00809246	0.164572
ENSMUSG00000032554	22041	Trf	3623.58	-0.487977	0.184304	2.64767	0.0081048	0.164572
ENSMUSG00000054641	70945	Mmrn1	434.349	-0.509415	0.192354	2.64833	0.00808915	0.164572
ENSMUSG00000040701	11766	Ap1g2	95.0414	0.483338	0.182512	-2.64826	0.00809076	0.164572
ENSMUSG00000056698	232089	Elmod3	286.981	-0.401865	0.151785	2.64759	0.00810671	0.164572
ENSMUSG00000022456	24050	37865	98.3518	0.513273	0.193935	-2.64662	0.00812998	0.164754
ENSMUSG00000031737	54352	Irx5	41.0584	-0.555168	0.2098	2.64618	0.00814071	0.164754
ENSMUSG00000026077	18143	Npas2	79.446	0.505823	0.191179	-2.6458	0.00814974	0.164754
ENSMUSG00000071337	21841	Tia1	877.027	0.337536	0.127636	-2.64451	0.00818092	0.165154
ENSMUSG00000027684	14013	Mecom	862.567	-0.310751	0.117596	2.64253	0.00822891	0.165893
ENSMUSG00000040522	170744	Tlr8	128.896	-0.496822	0.188126	2.6409	0.00826869	0.166351
ENSMUSG00000028433	68926	Ubap2	1259.64	0.389246	0.14753	-2.63841	0.00832951	0.166867
ENSMUSG00000029097	78890	2310079F23Rik	162.709	0.426595	0.161695	-2.63826	0.00833327	0.166867
ENSMUSG00000030306	387314	Tmtc1	9892.85	-0.270398	0.102511	2.63773	0.00834622	0.166867
ENSMUSG00000027715	12428	Ccna2	39.9374	0.569192	0.215785	-2.63778	0.00834508	0.166867
ENSMUSG00000030148	26888	Clec4a2	47.0844	-0.541173	0.205258	2.63655	0.00837547	0.167221
ENSMUSG00000038175	218203	Mylip	746.914	-0.479117	0.18188	2.63425	0.00843227	0.168124
ENSMUSG00000025723	68039	Nmb	62.3841	-0.563303	0.214056	2.63157	0.00849906	0.169223
ENSMUSG00000050556	16500	Kcnb1	1925.63	0.2846	0.108278	-2.62841	0.00857856	0.169746
ENSMUSG00000064246	12654	Chi3l1	49.5237	-0.563882	0.214551	2.6282	0.00858382	0.169746
ENSMUSG00000050663	237553	Trhde	62.1224	-0.552554	0.210267	2.62787	0.00859223	0.169746
ENSMUSG00000034839	67557	Larp6	112.373	-0.467818	0.178031	2.62774	0.00859545	0.169746
ENSMUSG00000017309	52685	Cd300lg	1087.3	-0.366907	0.139547	2.62926	0.00855702	0.169746
ENSMUSG00000037613	79201	Tnfrsf23	81.5951	0.558242	0.212321	-2.62924	0.00855769	0.169746
ENSMUSG00000026254	26987	Eif4e2	1155.46	0.319965	0.12183	-2.62633	0.00863112	0.170218
ENSMUSG00000048776	19227	Pthlh	83.0865	-0.532794	0.203029	2.62422	0.00868467	0.171042
ENSMUSG00000058886	54006	Deaf1	222.683	0.395975	0.150919	-2.62375	0.00869673	0.171047
ENSMUSG00000027993	80890	Trim2	461.967	-0.364766	0.139068	2.62294	0.00871754	0.171225
ENSMUSG00000042793	329252	Lgr6	1174.75	0.424277	0.16182	-2.62191	0.00874397	0.171512
ENSMUSG00000009905	70750	Kdsr	466.553	-0.38883	0.148407	2.62002	0.0087924	0.171765
ENSMUSG00000038342	208104	Mlxip	1994.33	0.338223	0.129047	-2.62092	0.00876932	0.171765
ENSMUSG00000029228	16924	Lnx1	245.284	-0.444129	0.169489	2.6204	0.00878257	0.171765
ENSMUSG00000030342	12527	Cd9	1461.72	-0.423914	0.161914	2.61815	0.00884083	0.172479
ENSMUSG00000002504	65962	Slc9a3r2	2614.02	-0.452761	0.173053	2.61632	0.00888841	0.173175
ENSMUSG00000035150	26905	Eif2s3x	139.135	-0.511707	0.195724	2.61443	0.00893761	0.1739
ENSMUSG00000040229	23890	Gpr34	109.46	-0.551652	0.211105	2.61317	0.00897068	0.17406
ENSMUSG00000090077	72699	Lime1	380.997	0.391901	0.149996	-2.61275	0.00898178	0.17406
ENSMUSG00000027111	16403	Itga6	2595.48	0.378339	0.144838	-2.61216	0.00899721	0.174126
ENSMUSG00000040387	212390	Klhl32	70.8863	0.54059	0.207139	-2.60979	0.00905975	0.175
ENSMUSG00000048216	64450	Gpr85	22.1546	-0.562972	0.215949	2.60697	0.00913482	0.175714
ENSMUSG00000000732	50723	Icosl	537.743	-0.383148	0.146994	2.60655	0.00914585	0.175714
ENSMUSG00000031790	17388	Mmp15	3612.5	0.348857	0.133818	-2.60695	0.00913522	0.175714
ENSMUSG00000024170	71718	Telo2	283.551	0.400736	0.153755	-2.60633	0.00915189	0.175714
ENSMUSG00000037266	27981	D4Wsu53e	3395.63	0.319108	0.122533	-2.60427	0.00920704	0.176539
ENSMUSG00000075000	641340	Nrbf2	68.1414	-0.491107	0.188758	2.60179	0.00927391	0.177587
ENSMUSG00000020928	75689	Higd1b	69.712	0.530023	0.20397	-2.59853	0.00936237	0.178809
ENSMUSG00000021253	21809	Tgfb3	2044.59	-0.355988	0.137072	2.59709	0.00940172	0.179089
ENSMUSG00000052488	27967	Cherp	471.933	0.384827	0.148157	-2.59743	0.00939254	0.179089
ENSMUSG00000045114	69017	Prrt2	42.7795	0.539105	0.207618	-2.59662	0.00941468	0.179101
ENSMUSG00000035357	55983	Pdzrn3	4353.8	-0.370777	0.142872	2.59517	0.00945437	0.179621
ENSMUSG00000014778	234686	Fhod1	303.552	0.418796	0.161426	-2.59435	0.00947701	0.179815
ENSMUSG00000024050	22404	Wiz	342.185	0.4421	0.170529	-2.59252	0.00952753	0.180303
ENSMUSG00000036362	74191	P2ry13	86.2735	-0.515965	0.199096	2.59154	0.00955481	0.180583
ENSMUSG00000071656	68852	Lrrn4cl	232.292	-0.470684	0.181714	2.59025	0.00959073	0.180966
ENSMUSG00000026941	381352	Mamdc4	181.226	0.403839	0.15607	-2.58755	0.00966614	0.181459
ENSMUSG00000017740	57138	Slc12a5	70.7115	0.550899	0.21297	-2.58675	0.00968866	0.181459
ENSMUSG00000079188	665574	Gm7694	361.325	0.416421	0.160974	-2.58688	0.0096849	0.181459
ENSMUSG00000025473	11501	Adam8	32.0831	0.542688	0.209741	-2.58742	0.00966978	0.181459
ENSMUSG00000019769	64009	Syne1	5005.48	0.34627	0.133969	-2.58471	0.00974602	0.182298
ENSMUSG00000035930	26887	Chst4	246.467	-0.500612	0.193821	2.58286	0.00979844	0.182808
ENSMUSG00000048572	226040	E030010A14Rik	100.567	0.50567	0.195773	-2.58294	0.00979634	0.182808
ENSMUSG00000031997	22068	Trpc6	36.0507	0.557815	0.216072	-2.58162	0.00983382	0.183232
ENSMUSG00000036391	77371	Sec24a	1104.27	0.372775	0.1445	-2.57975	0.0098872	0.183991
ENSMUSG00000021870	83997	Slmap	8924.28	-0.428725	0.166231	2.57909	0.00990606	0.184106
ENSMUSG00000037169	18109	Mycn	36.8619	0.556362	0.2158	-2.57814	0.00993351	0.184144
ENSMUSG00000033530	104718	Ttc7b	1001.69	0.409033	0.15875	-2.57659	0.00997804	0.184338
ENSMUSG00000056211	226412	R3hdm1	995.265	0.413574	0.160502	-2.57675	0.00997352	0.184338
ENSMUSG00000034832	194388	Tet3	1174	0.393489	0.152725	-2.57645	0.00998209	0.184338
ENSMUSG00000036103	140792	Colec12	2409.22	-0.328893	0.127691	2.57569	0.0100041	0.18451
ENSMUSG00000030768	68897	Disp1	436.906	0.379945	0.147602	-2.57412	0.0100495	0.184535
ENSMUSG00000049897	279029	Gm711	15.469	0.553311	0.214935	-2.57432	0.0100438	0.184535
ENSMUSG00000038007	230379	Acer2	1682.34	-0.476677	0.185114	2.57505	0.0100226	0.184535
ENSMUSG00000031451	14456	Gas6	8393.05	-0.326899	0.127028	2.57345	0.010069	0.184535
ENSMUSG00000042485	66175	Mustn1	187.435	-0.400262	0.155531	2.57352	0.0100671	0.184535
ENSMUSG00000032850	269695	Rnft2	62.9327	0.521739	0.202787	-2.57284	0.0100868	0.184536
ENSMUSG00000060802	12010	B2m	3447.93	-0.391745	0.152277	2.57258	0.0100945	0.184536
ENSMUSG00000049504	212127	2810046L04Rik	189.208	0.500104	0.1945	-2.57123	0.0101337	0.184787
ENSMUSG00000038393	56338	Txnip	13864.6	-0.530757	0.206406	2.57142	0.0101282	0.184787
ENSMUSG00000067889	20743	Spnb3	54.3735	0.522001	0.203251	-2.56825	0.0102212	0.186149
ENSMUSG00000031503	12827	Col4a2	10451.5	0.455129	0.177299	-2.56701	0.0102579	0.186584
ENSMUSG00000025855	19085	Prkar1b	36.1207	0.542523	0.21142	-2.56609	0.0102851	0.186844
ENSMUSG00000032902	20501	Slc16a1	10002.5	-0.356649	0.139081	2.56433	0.0103376	0.187142
ENSMUSG00000023052	54615	Npff	37.8031	0.529645	0.20655	-2.56424	0.0103402	0.187142
ENSMUSG00000035799	22160	Twist1	66.4755	-0.497463	0.193947	2.56494	0.0103193	0.187142
ENSMUSG00000041890	26431	Git2	1096.11	0.317618	0.124022	-2.56099	0.0104374	0.187499
ENSMUSG00000020826	18126	Nos2	107.862	0.536228	0.209297	-2.56205	0.0104056	0.187499
ENSMUSG00000049551	14371	Fzd9	34.6396	0.553428	0.216051	-2.56156	0.0104202	0.187499
ENSMUSG00000039457	19041	Ppl	2532.93	-0.406956	0.158891	2.56123	0.0104302	0.187499
ENSMUSG00000027408	56264	Cpxm1	623.711	-0.399624	0.156028	2.56123	0.0104302	0.187499
ENSMUSG00000068923	229521	Syt11	428.657	-0.327	0.127599	2.56272	0.0103857	0.187499
ENSMUSG00000047344	236285	Lancl3	212.848	-0.489401	0.191165	2.56009	0.0104645	0.187753
ENSMUSG00000023473	107934	Celsr3	93.6949	0.464084	0.181317	-2.55952	0.0104817	0.187763
ENSMUSG00000057230	269774	Aak1	4756.9	0.342814	0.133975	-2.55879	0.0105039	0.187763
ENSMUSG00000027326	76464	Casc5	43.063	0.54658	0.213592	-2.55899	0.0104976	0.187763
ENSMUSG00000040712	216874	Camta2	1007.86	0.440098	0.172178	-2.55607	0.0105862	0.189003
ENSMUSG00000022351	20775	Sqle	73.0402	0.53079	0.207784	-2.55453	0.0106331	0.189374
ENSMUSG00000091243	73569	Vgll3	192.999	-0.485112	0.190012	2.55305	0.0106784	0.189714
ENSMUSG00000058135	14862	Gstm1	2240.91	-0.44137	0.173078	2.55012	0.0107686	0.190525
ENSMUSG00000021179	217827	BC002230	479.323	-0.354145	0.138912	2.54942	0.0107903	0.190525
ENSMUSG00000002346	73095	Slc25a42	596.645	0.482502	0.189308	-2.54876	0.0108106	0.190525
ENSMUSG00000036473	224617	Tbc1d24	586.667	0.358155	0.140531	-2.54859	0.0108159	0.190525
ENSMUSG00000024132	13177	Eci1	2487.12	-0.318499	0.124874	2.55056	0.010755	0.190525
ENSMUSG00000072704	381820	2700089E24Rik	4479.1	-0.299195	0.117361	2.54935	0.0107923	0.190525
ENSMUSG00000030022	101401	Adamts9	768.963	0.494152	0.193809	-2.54969	0.0107818	0.190525
ENSMUSG00000057522	20747	Spop	4017.8	0.281337	0.110474	-2.54663	0.0108768	0.191134
ENSMUSG00000022389	21685	Tef	6816.61	-0.30794	0.121079	2.5433	0.0109811	0.191265
ENSMUSG00000020019	57764	Ntn4	570.377	-0.354276	0.13925	2.54417	0.0109538	0.191265
ENSMUSG00000024085	17158	Man2a1	2225.98	-0.380285	0.149418	2.54511	0.0109242	0.191265
ENSMUSG00000060519	30935	Tor3a	622.251	-0.319577	0.125668	2.54303	0.0109897	0.191265
ENSMUSG00000024084	70536	Qpct	336.804	-0.497912	0.195763	2.54344	0.0109767	0.191265
ENSMUSG00000036144	17286	Meox2	250.592	0.436486	0.171566	-2.54414	0.0109549	0.191265
ENSMUSG00000032806	214601	Slc10a3	258.782	-0.350126	0.137623	2.54409	0.0109564	0.191265
ENSMUSG00000037725	80986	Ckap2	26.3609	0.549584	0.215974	-2.54468	0.0109378	0.191265
ENSMUSG00000029086	19126	Prom1	50.8546	-0.503224	0.198019	2.54129	0.0110444	0.191762
ENSMUSG00000020154	19263	Ptprb	8198.34	-0.29688	0.116856	2.54056	0.0110675	0.191762
ENSMUSG00000020091	13688	Eif4ebp2	520.067	0.383609	0.151001	-2.54045	0.0110711	0.191762
ENSMUSG00000038902	229584	Pogz	1094.51	0.311746	0.122705	-2.54062	0.0110657	0.191762
ENSMUSG00000072919	71275	4933437F05Rik	19.0045	0.544637	0.214498	-2.53912	0.011113	0.191996
ENSMUSG00000022812	56637	Gsk3b	3115.4	0.358744	0.141306	-2.53877	0.0111244	0.191996
ENSMUSG00000003031	12576	Cdkn1b	1016.62	-0.285087	0.112265	2.53942	0.0111037	0.191996
ENSMUSG00000038214	331623	Bend3	274.129	-0.395959	0.155991	2.53835	0.0111375	0.191996
ENSMUSG00000024008	240058	Cpne5	369.79	0.381314	0.150282	-2.53732	0.0111703	0.192334
ENSMUSG00000046667	72397	Rbm12b	160.62	0.419965	0.165559	-2.53665	0.011192	0.192479
ENSMUSG00000035049	107094	Rrp12	599.513	-0.399844	0.157784	2.53411	0.0112732	0.193496
ENSMUSG00000028383	72479	Hsdl2	3715.13	-0.403229	0.159151	2.53362	0.0112892	0.193496
ENSMUSG00000035274	21983	Tpbg	87.9675	-0.46083	0.18201	2.5319	0.0113447	0.194184
ENSMUSG00000037369	22289	Kdm6a	1349.11	-0.45217	0.178625	2.53138	0.0113613	0.194194
ENSMUSG00000026797	20910	Stxbp1	937.703	0.442798	0.174946	-2.53105	0.011372	0.194194
ENSMUSG00000021215	56349	Net1	443.434	-0.390142	0.154252	2.52925	0.0114305	0.194535
ENSMUSG00000032643	14201	Fhl3	90.5478	0.531763	0.210317	-2.52838	0.011459	0.194535
ENSMUSG00000024613	21453	Tcof1	562.794	0.385101	0.152288	-2.52876	0.0114465	0.194535
ENSMUSG00000027349	68215	Fam98b	206.993	0.454614	0.179776	-2.52877	0.0114462	0.194535
ENSMUSG00000033031	224171	C330027C09Rik	69.6612	0.479936	0.189874	-2.52766	0.0114824	0.194574
ENSMUSG00000044674	14362	Fzd1	557.881	-0.349016	0.138088	2.52749	0.0114881	0.194574
ENSMUSG00000051022	15476	Hs3st1	243.994	-0.38145	0.151055	2.52523	0.0115622	0.1956
ENSMUSG00000049539	80838	Hist1h1a	59.6881	0.541505	0.214482	-2.52472	0.0115792	0.19566
ENSMUSG00000040543	327958	Pitpnm3	115.738	0.453288	0.17964	-2.52332	0.0116253	0.196211
ENSMUSG00000037852	12876	Cpe	11636.1	-0.258518	0.102496	2.52223	0.0116613	0.196589
ENSMUSG00000043243	100037278	Fam129c	53.4916	0.50438	0.200028	-2.52155	0.0116838	0.196684
ENSMUSG00000036698	239528	Eif2c2	2197.74	0.318427	0.126331	-2.52059	0.011716	0.196684
ENSMUSG00000000184	12444	Ccnd2	4829.94	0.352524	0.139877	-2.52024	0.0117275	0.196684
ENSMUSG00000020101	74048	4632428N05Rik	1074.84	-0.35901	0.1424	2.52114	0.0116974	0.196684
ENSMUSG00000029512	22241	Ulk1	1851.44	0.387626	0.153818	-2.52003	0.0117346	0.196684
ENSMUSG00000031770	64209	Herpud1	8966.41	-0.388294	0.154126	2.51932	0.011758	0.196848
ENSMUSG00000030522	233315	Mtmr10	795.596	-0.310236	0.123191	2.51833	0.0117914	0.197086
ENSMUSG00000040282	399568	BC052040	51.7595	0.511594	0.203301	-2.51644	0.0118548	0.197784
ENSMUSG00000040249	16971	Lrp1	32572.4	-0.399996	0.158984	2.51596	0.0118708	0.197825
ENSMUSG00000022000	67302	Zc3h13	1285.23	0.274014	0.109008	-2.5137	0.0119473	0.198871
ENSMUSG00000039414	320473	Heatr5b	1361	0.327472	0.13038	-2.51168	0.0120158	0.199781
ENSMUSG00000030711	20887	Sult1a1	1377.11	-0.4506	0.179715	2.5073	0.0121658	0.201353
ENSMUSG00000026360	19735	Rgs2	2492.62	-0.394311	0.157231	2.50784	0.0121471	0.201353
ENSMUSG00000026558	80914	Uck2	728.509	-0.466378	0.185996	2.50747	0.0121601	0.201353
ENSMUSG00000005667	17768	Mthfd2	148.508	0.468071	0.186653	-2.50771	0.0121515	0.201353
ENSMUSG00000038216	18948	Pnmt	47.0531	-0.533194	0.212885	2.50461	0.0122586	0.202657
ENSMUSG00000026434	98415	Nucks1	3330.71	-0.313478	0.125328	2.50126	0.0123751	0.204203
ENSMUSG00000032293	64602	Ireb2	1930.02	0.339811	0.135893	-2.50058	0.0123992	0.204284
ENSMUSG00000034311	16571	Kif4	28.0853	0.53464	0.214116	-2.49696	0.0125262	0.205195
ENSMUSG00000051413	54711	Plagl2	224.855	0.430112	0.172306	-2.4962	0.0125531	0.205195
ENSMUSG00000033082	243653	Clec1a	528.699	-0.416438	0.16667	2.49857	0.0124694	0.205195
ENSMUSG00000013483	170720	Card14	57.0778	0.516237	0.206753	-2.49687	0.0125294	0.205195
ENSMUSG00000040524	214812	Zfp609	1094.47	0.374761	0.150041	-2.49773	0.0124993	0.205195
ENSMUSG00000029032	230972	Arhgef16	36.6285	0.522626	0.209369	-2.49619	0.0125534	0.205195
ENSMUSG00000037621	71093	Atoh8	179.141	-0.433891	0.17379	2.49663	0.0125378	0.205195
ENSMUSG00000078676	192160	Casc3	708.982	0.289683	0.116105	-2.49501	0.0125955	0.205651
ENSMUSG00000040054	116848	Baz2a	1962.34	0.349619	0.140162	-2.4944	0.0126172	0.205773
ENSMUSG00000055978	14344	Fut2	57.4979	0.508408	0.203923	-2.49314	0.0126619	0.205854
ENSMUSG00000038578	634731	Susd1	95.0831	-0.458883	0.184064	2.49306	0.0126647	0.205854
ENSMUSG00000035397	118445	Klf16	150.626	0.456011	0.182898	-2.49325	0.0126579	0.205854
ENSMUSG00000020695	17534	Mrc2	1969.03	-0.347033	0.139235	2.49243	0.0126872	0.20599
ENSMUSG00000004631	20392	Sgce	611.643	-0.386147	0.155106	2.48957	0.0127899	0.206731
ENSMUSG00000049134	18175	Nrap	24124.8	-0.406158	0.163127	2.48983	0.0127805	0.206731
ENSMUSG00000092491	18175	Nrap	24124.8	-0.406158	0.163127	2.48983	0.0127805	0.206731
ENSMUSG00000031516	22428	Dctn6	1178.69	-0.353408	0.141894	2.49064	0.0127512	0.206731
ENSMUSG00000001247	54135	Lsr	154.263	-0.471442	0.189332	2.49003	0.0127731	0.206731
ENSMUSG00000039239	21808	Tgfb2	642.374	-0.364775	0.146584	2.48851	0.0128278	0.207115
ENSMUSG00000028420	52076	Tmem38b	445.982	0.37856	0.152172	-2.48771	0.0128568	0.207352
ENSMUSG00000004996	67873	Mri1	170.642	-0.375892	0.151231	2.48555	0.0129351	0.207733
ENSMUSG00000056493	17425	Foxk1	1078.73	0.386414	0.155518	-2.48469	0.0129663	0.207733
ENSMUSG00000031758	75796	Cdyl2	284.857	0.333187	0.134041	-2.48571	0.0129294	0.207733
ENSMUSG00000038332	140742	Sesn1	4342.38	-0.321289	0.129338	2.4841	0.0129878	0.207804
ENSMUSG00000027555	71934	Car13	81.9742	-0.442698	0.178235	2.48379	0.0129994	0.207804
ENSMUSG00000027602	66734	Map1lc3a	9158.46	-0.326136	0.131333	2.48328	0.0130177	0.207868
ENSMUSG00000040562	14863	Gstm2	981.429	-0.332878	0.134099	2.48233	0.0130527	0.208049
ENSMUSG00000022425	18606	Enpp2	861.24	-0.401318	0.161683	2.48212	0.0130602	0.208049
ENSMUSG00000054931	544922	Zkscan4	62.3195	-0.485537	0.19567	2.48141	0.0130864	0.208049
ENSMUSG00000021835	12159	Bmp4	288.346	-0.375962	0.151488	2.48179	0.0130723	0.208049
ENSMUSG00000058396	11536	Gpr182	368.218	-0.458071	0.185112	2.47456	0.01334	0.210696
ENSMUSG00000026655	66540	Fam107b	327.499	-0.37508	0.151551	2.47494	0.0133259	0.210696
ENSMUSG00000036768	209737	Kif15	29.769	0.534578	0.215961	-2.47534	0.0133109	0.210696
ENSMUSG00000029685	78910	Asb15	649.061	0.493743	0.199523	-2.47462	0.0133376	0.210696
ENSMUSG00000040312	240084	Cchcr1	76.5784	0.482169	0.194845	-2.47463	0.0133373	0.210696
ENSMUSG00000037463	233040	Fbxo27	53.0202	0.495444	0.200063	-2.47644	0.0132701	0.210696
ENSMUSG00000027699	13605	Ect2	33.2557	0.534567	0.216071	-2.47404	0.0133596	0.210776
ENSMUSG00000037820	21817	Tgm2	13908.8	-0.333215	0.134709	2.4736	0.0133759	0.210804
ENSMUSG00000029186	67073	Pi4k2b	142.547	-0.447842	0.181109	2.47278	0.0134068	0.210835
ENSMUSG00000021047	664883	Nova1	231.693	0.382857	0.154814	-2.47301	0.0133981	0.210835
ENSMUSG00000030237	28250	Slco1a4	68.1995	-0.513422	0.207696	2.47199	0.0134365	0.210997
ENSMUSG00000025417	117150	Pip4k2c	2228.12	0.360931	0.146024	-2.47173	0.0134462	0.210997
ENSMUSG00000001739	60363	Cldn15	568.662	-0.437925	0.177252	2.47063	0.0134874	0.211414
ENSMUSG00000036528	19024	Ppfibp2	1240.35	0.315422	0.127706	-2.46991	0.0135147	0.211613
ENSMUSG00000041794	245049	Myrip	764.051	-0.37139	0.150409	2.46921	0.0135412	0.211801
ENSMUSG00000058779	67952	Tomm20	879.308	-0.324673	0.13153	2.46842	0.013571	0.212038
ENSMUSG00000026587	11899	Astn1	39.6783	0.518366	0.210053	-2.46778	0.0135953	0.212189
ENSMUSG00000041117	434130	Ccdc8	509.42	0.36701	0.14878	-2.4668	0.0136328	0.212545
ENSMUSG00000070319	53356	Eif3g	1318.66	-0.28531	0.115714	2.46563	0.0136771	0.212671
ENSMUSG00000034071	619331	Zfp551	87.7491	-0.456214	0.185041	2.46548	0.013683	0.212671
ENSMUSG00000026014	77300	Raph1	2842.53	0.357433	0.145043	-2.46433	0.013727	0.213099
ENSMUSG00000019214	214901	Chtf18	44.587	0.521409	0.211616	-2.46394	0.013742	0.213104
ENSMUSG00000052387	226025	Trpm3	88.5032	0.443451	0.180009	-2.46349	0.0137591	0.213141
ENSMUSG00000020794	67128	Ube2g1	1499.72	-0.349543	0.14199	2.46174	0.0138266	0.213959
ENSMUSG00000026135	77264	Zfp142	534.559	0.345526	0.140471	-2.45977	0.0139026	0.214335
ENSMUSG00000039005	21898	Tlr4	1472.18	-0.397413	0.161519	2.46047	0.0138754	0.214335
ENSMUSG00000020227	73914	Irak3	244.954	-0.388279	0.157864	2.45958	0.01391	0.214335
ENSMUSG00000031026	330627	Trim66	24.6138	-0.531519	0.216041	2.46028	0.013883	0.214335
ENSMUSG00000022623	58234	Shank3	1683.28	0.368324	0.149885	-2.45738	0.0139954	0.215423
ENSMUSG00000023968	114570	Crip3	128.486	0.485446	0.197587	-2.45687	0.0140153	0.215501
ENSMUSG00000090084	51795	Srpx	309.443	-0.406624	0.165546	2.45626	0.0140393	0.215613
ENSMUSG00000020658	668212	Efr3b	391.752	0.422125	0.171881	-2.45592	0.0140524	0.215613
ENSMUSG00000040605	56175	Bace2	768.756	-0.395128	0.160993	2.45432	0.0141153	0.216121
ENSMUSG00000030731	20981	Syt3	77.6985	0.48817	0.198938	-2.45388	0.0141326	0.216158
ENSMUSG00000007827	232339	Ankrd26	287.963	0.367196	0.149718	-2.45259	0.0141832	0.216704
ENSMUSG00000029076	20318	Sdf4	3377.24	-0.267459	0.109119	2.45109	0.0142425	0.217382
ENSMUSG00000060224	74580	Pyroxd2	443.356	0.395485	0.161466	-2.44934	0.0143118	0.217941
ENSMUSG00000033576	71939	Apol6	33.0564	-0.527363	0.21532	2.4492	0.0143173	0.217941
ENSMUSG00000090877	15511	Hspa1b	364.785	0.441351	0.18036	-2.44706	0.0144027	0.217941
ENSMUSG00000028333	67628	Anp32b	162.87	0.44837	0.183219	-2.44718	0.0143978	0.217941
ENSMUSG00000003746	17155	Man1a	2178.07	-0.31362	0.128195	2.44644	0.0144276	0.217941
ENSMUSG00000006403	240913	Adamts4	16.8642	0.5218	0.213113	-2.44847	0.0143466	0.217941
ENSMUSG00000042985	100647	Upk3b	2578.51	-0.470501	0.192284	2.4469	0.014409	0.217941
ENSMUSG00000050222	239114	Il17d	87.14	-0.481226	0.196589	2.44788	0.0143701	0.217941
ENSMUSG00000006732	17299	Mettl1	268.427	-0.349412	0.142832	2.44632	0.0144323	0.217941
ENSMUSG00000078202	67122	Nrarp	232.222	0.4325	0.176677	-2.44797	0.0143664	0.217941
ENSMUSG00000024642	21888	Tle4	485.636	-0.313711	0.128254	2.44602	0.0144443	0.217941
ENSMUSG00000044033	545428	Ccdc141	6721.18	0.26217	0.107225	-2.44503	0.0144839	0.218311
ENSMUSG00000025105	12173	Bnc1	280.662	-0.390545	0.159843	2.44331	0.0145534	0.219132
ENSMUSG00000003575	382056	Crtc1	344.302	0.422752	0.173085	-2.44245	0.0145881	0.219199
ENSMUSG00000039262	227723	Prrc2b	8109.6	0.360841	0.147841	-2.44073	0.0146577	0.220017
ENSMUSG00000030084	18844	Plxna1	1610.86	0.338538	0.138748	-2.43995	0.0146893	0.220263
ENSMUSG00000043008	239743	Klhl6	407.838	-0.386579	0.158648	2.4367	0.0148219	0.222022
ENSMUSG00000019873	28193	Reep3	1365.87	-0.305586	0.125459	2.43574	0.0148612	0.222065
ENSMUSG00000038256	77578	Bcl9	326.848	0.48016	0.197149	-2.43551	0.0148706	0.222065
ENSMUSG00000020653	194655	Klf11	520.028	-0.50381	0.206823	2.43595	0.0148527	0.222065
ENSMUSG00000025089	14585	Gfra1	303.446	-0.497754	0.204448	2.43462	0.0149074	0.222385
ENSMUSG00000028233	116940	Tgs1	437.563	0.335984	0.138048	-2.43382	0.0149404	0.222649
ENSMUSG00000023011	72393	Faim2	28.6963	-0.525695	0.216073	2.43296	0.014976	0.222723
ENSMUSG00000022521	12914	Crebbp	3258.02	0.289682	0.119056	-2.43315	0.0149683	0.222723
ENSMUSG00000027763	56758	Mbnl1	9394.52	-0.288509	0.118639	2.43183	0.0150228	0.22319
ENSMUSG00000057637	110593	Prdm2	1634.48	0.297292	0.12234	-2.43005	0.0150966	0.224057
ENSMUSG00000020534	20425	Shmt1	104.494	0.439259	0.18083	-2.42913	0.0151351	0.22417
ENSMUSG00000006642	69852	Tcf23	34.3544	-0.523449	0.215773	2.42593	0.0152692	0.225855
ENSMUSG00000005442	71722	Cic	1408.24	0.36771	0.151591	-2.42567	0.01528	0.225855
ENSMUSG00000022439	64099	Parvg	61.8449	0.476361	0.196453	-2.42481	0.0153166	0.226165
ENSMUSG00000041120	17965	Nbl1	841.043	-0.407524	0.168137	2.42377	0.0153604	0.226582
ENSMUSG00000044548	59036	Dact1	250.909	-0.393059	0.162238	2.42274	0.0154041	0.226996
ENSMUSG00000036136	104943	Fam110c	78.032	-0.511919	0.211339	2.42226	0.0154241	0.22706
ENSMUSG00000024905	17771	Mtl5	63.6607	-0.515324	0.212887	2.42065	0.0154929	0.227841
ENSMUSG00000022463	20788	Srebf2	1019.85	0.369714	0.152837	-2.419	0.0155632	0.228643
ENSMUSG00000066392	18191	Nrxn3	14.3535	0.496628	0.20541	-2.41774	0.0156174	0.229207
ENSMUSG00000036617	208618	Etl4	454.301	0.36159	0.14961	-2.41689	0.0156536	0.229276
ENSMUSG00000040247	108995	Tbc1d10c	243.286	0.394729	0.163301	-2.41718	0.0156413	0.229276
ENSMUSG00000029101	71729	Rgs12	2918.41	0.429624	0.177878	-2.41528	0.0157231	0.229598
ENSMUSG00000020894	22318	Vamp2	705.554	0.372704	0.154367	-2.4144	0.0157612	0.229861
ENSMUSG00000074165	67607	Zfp788	545.838	-0.358406	0.148462	2.41413	0.0157728	0.229861
ENSMUSG00000058773	56702	Hist1h1b	61.751	0.517838	0.214796	-2.41084	0.015916	0.230423
ENSMUSG00000028799	230761	Zfp362	266.893	0.381148	0.158014	-2.41212	0.0158602	0.230423
ENSMUSG00000060261	14886	Gtf2i	5075.79	0.330755	0.137136	-2.41188	0.0158704	0.230423
ENSMUSG00000029407	56041	Uso1	1967.58	0.340154	0.14107	-2.41124	0.0158983	0.230423
ENSMUSG00000022032	71145	Scara5	1936.93	-0.348514	0.144451	2.41268	0.0158359	0.230423
ENSMUSG00000022146	18414	Osmr	1771.79	-0.396114	0.164272	2.41133	0.0158946	0.230423
ENSMUSG00000006456	56275	Rbm14	638.025	0.30041	0.124677	-2.40951	0.0159741	0.23094
ENSMUSG00000015852	80891	Fcrls	335.516	-0.388781	0.161383	2.40906	0.0159938	0.230995
ENSMUSG00000025323	20688	Sp4	713.898	-0.325899	0.135454	2.40598	0.0161291	0.232497
ENSMUSG00000023036	93707	Pcdhga9	75.6197	0.477156	0.198322	-2.40597	0.0161298	0.232497
ENSMUSG00000062488	667370	I830012O16Rik	61.9364	-0.495672	0.206148	2.40445	0.0161968	0.233231
ENSMUSG00000021456	14120	Fbp2	86.6008	-0.511753	0.212918	2.40352	0.0162381	0.233594
ENSMUSG00000033486	212670	Catsper2	109.581	0.450952	0.187708	-2.40241	0.0162873	0.23407
ENSMUSG00000021127	12192	Zfp36l1	1027.61	0.292658	0.121889	-2.40101	0.0163499	0.234736
ENSMUSG00000024754	83921	Tmem2	4351.54	-0.416235	0.173431	2.40001	0.0163945	0.235145
ENSMUSG00000027995	24088	Tlr2	238.101	-0.357187	0.148887	2.39906	0.0164374	0.2355
ENSMUSG00000037989	75607	Wnk2	2999.62	0.414772	0.172939	-2.39838	0.0164679	0.2355
ENSMUSG00000019539	52377	Rcn3	1187.34	-0.355559	0.148287	2.39778	0.0164948	0.235652
ENSMUSG00000032040	69305	Dcps	411.529	-0.381173	0.159025	2.39694	0.0165325	0.235726
ENSMUSG00000039942	19219	Ptger4	245.524	-0.392438	0.163717	2.39705	0.0165279	0.235726
ENSMUSG00000033355	67775	Rtp4	97.0027	-0.467873	0.195327	2.39533	0.0166056	0.236072
ENSMUSG00000069910	70385	Ccdc99	25.4253	0.511832	0.213629	-2.3959	0.0165798	0.236072
ENSMUSG00000037813	228846	D630003M21Rik	503.289	-0.354225	0.14787	2.39551	0.0165971	0.236072
ENSMUSG00000033282	244585	Rpgrip1l	212.365	0.400396	0.167251	-2.39398	0.0166665	0.236707
ENSMUSG00000018761	24070	Mpdu1	229.644	-0.392809	0.16424	2.39168	0.0167714	0.237499
ENSMUSG00000009291	108705	Pttg1ip	3896.45	-0.257502	0.107657	2.39187	0.0167626	0.237499
ENSMUSG00000005514	18984	Por	1679.91	-0.385324	0.161094	2.39192	0.0167604	0.237499
ENSMUSG00000022283	18458	Pabpc1	1360.76	0.29415	0.123167	-2.38823	0.01693	0.238047
ENSMUSG00000003420	14132	Fcgrt	3102.03	-0.289829	0.121361	2.38815	0.0169334	0.238047
ENSMUSG00000032966	14225	Fkbp1a	1504.75	0.265454	0.11119	-2.3874	0.0169681	0.238047
ENSMUSG00000093668	75507	Pou5f2	21.6347	0.516096	0.216072	-2.38854	0.0169154	0.238047
ENSMUSG00000038816	54366	Ctnnal1	2449.65	0.281264	0.117764	-2.38838	0.0169229	0.238047
ENSMUSG00000034810	20272	Scn7a	4212.04	-0.362455	0.151695	2.38937	0.0168775	0.238047
ENSMUSG00000039477	231861	Tnrc18	2328.69	0.421696	0.176654	-2.38713	0.0169804	0.238047
ENSMUSG00000048327	70466	Ckap2l	27.1524	0.516338	0.216059	-2.3898	0.0168576	0.238047
ENSMUSG00000074896	15959	Ifit3	72.8174	-0.484899	0.203345	2.38461	0.0170973	0.239313
ENSMUSG00000069312	360198	Hist1h3h	17.3344	0.48773	0.204711	-2.38253	0.0171943	0.239746
ENSMUSG00000075032	360198	Hist1h3i	17.3344	0.48773	0.204711	-2.38253	0.0171943	0.239746
ENSMUSG00000032842	224814	Abcc10	302.539	0.447113	0.187636	-2.38288	0.017178	0.239746
ENSMUSG00000036905	12260	C1qb	214.089	-0.359903	0.151035	2.38292	0.0171761	0.239746
ENSMUSG00000062417	360198	Hist1h3g	17.3344	0.48773	0.204711	-2.38253	0.0171943	0.239746
ENSMUSG00000069265	360198	Hist1h3a	17.3344	0.48773	0.204711	-2.38253	0.0171943	0.239746
ENSMUSG00000074221	243905	Zfp568	1580.73	0.382732	0.160583	-2.38339	0.0171539	0.239746
ENSMUSG00000028607	12896	Cpt2	3138.39	-0.330265	0.13868	2.38149	0.017243	0.240194
ENSMUSG00000059555	227612	A830007P12Rik	255.949	-0.379191	0.159282	2.38062	0.0172835	0.240297
ENSMUSG00000048458	109050	6530418L21Rik	1211.57	0.469914	0.197479	-2.37956	0.0173332	0.240527
ENSMUSG00000066829	235050	Zfp810	443.936	-0.35088	0.147435	2.3799	0.0173173	0.240527
ENSMUSG00000021495	212483	Fam193b	737.732	0.32586	0.137092	-2.37695	0.0174566	0.241091
ENSMUSG00000039556	54646	Ppp1r3f	98.7313	0.490752	0.206444	-2.37717	0.0174458	0.241091
ENSMUSG00000074500	72230	Zfp558	44.6323	0.496765	0.208885	-2.37817	0.0173986	0.241091
ENSMUSG00000035621	59090	Midn	1904.77	0.328351	0.13814	-2.37694	0.0174569	0.241091
ENSMUSG00000066036	69116	Ubr4	11190.1	0.320652	0.134865	-2.37758	0.0174269	0.241091
ENSMUSG00000012114	94112	Med15	661.745	0.328353	0.138225	-2.3755	0.0175254	0.241807
ENSMUSG00000021327	72739	Zkscan3	902.47	0.324888	0.136807	-2.3748	0.0175586	0.242035
ENSMUSG00000002111	20375	Sfpi1	97.5654	-0.438096	0.184549	2.37387	0.0176025	0.242411
ENSMUSG00000038178	215113	Slc43a2	404.42	-0.366387	0.154513	2.37124	0.0177287	0.243917
ENSMUSG00000001663	14871	Gstt1	877.748	-0.364074	0.153592	2.3704	0.0177691	0.244241
ENSMUSG00000029311	114664	Hsd17b11	388.062	-0.372138	0.157053	2.36951	0.0178119	0.244598
ENSMUSG00000046329	66972	Slc25a23	1154.85	0.452154	0.190892	-2.36863	0.0178539	0.244917
ENSMUSG00000040084	12236	Bub1b	31.9875	0.510471	0.215541	-2.36832	0.0178689	0.244917
ENSMUSG00000027809	66841	Etfdh	10170.6	-0.323697	0.136841	2.36551	0.0180055	0.245217
ENSMUSG00000020321	17449	Mdh1	50665.4	-0.25456	0.107617	2.36543	0.018009	0.245217
ENSMUSG00000001930	22371	Vwf	11554.7	-0.44445	0.187826	2.36629	0.0179675	0.245217
ENSMUSG00000072647	280668	Adam1a	90.1817	0.421491	0.178031	-2.36752	0.0179078	0.245217
ENSMUSG00000031965	57246	Tbx20	7441.88	0.336786	0.142312	-2.36654	0.0179552	0.245217
ENSMUSG00000028763	15530	Hspg2	26876.2	0.358189	0.151355	-2.36654	0.0179553	0.245217
ENSMUSG00000019087	54411	Atp6ap1	3931.31	-0.265814	0.112353	2.36587	0.0179875	0.245217
ENSMUSG00000043300	26879	B3galnt1	157.355	-0.38201	0.161542	2.36477	0.0180412	0.245247
ENSMUSG00000029505	75560	Ep400	2480.68	0.278951	0.117965	-2.36469	0.018045	0.245247
ENSMUSG00000024462	54393	Gabbr1	338.932	0.331929	0.140413	-2.36396	0.018081	0.245505
ENSMUSG00000034518	70823	Hmgxb4	538.884	-0.335066	0.141773	2.3634	0.018108	0.245577
ENSMUSG00000037552	101497	Plekhg2	638.395	0.340675	0.144182	-2.36281	0.018137	0.245577
ENSMUSG00000027962	22329	Vcam1	2511.42	-0.44714	0.189364	2.36127	0.0182125	0.245863
ENSMUSG00000039633	244421	Lonrf1	554.796	0.357093	0.151239	-2.36112	0.01822	0.245863
ENSMUSG00000002250	19015	Ppard	412.994	0.386403	0.163661	-2.361	0.0182258	0.245863
ENSMUSG00000027533	16592	Fabp5	64.2719	-0.487393	0.206405	2.36135	0.0182087	0.245863
ENSMUSG00000069516	17105	Lyz2	2870.39	-0.268715	0.113832	2.36064	0.0182437	0.245874
ENSMUSG00000010205	71766	Raver1	875.87	0.390451	0.165488	-2.3594	0.0183048	0.246215
ENSMUSG00000051695	23983	Pcbp1	969.673	0.400168	0.169628	-2.35909	0.0183198	0.246215
ENSMUSG00000028082	27059	Sh3d19	1328.72	-0.325773	0.138083	2.35925	0.0183117	0.246215
ENSMUSG00000037071	20249	Scd1	5360.96	-0.499822	0.211965	2.35804	0.0183716	0.246682
ENSMUSG00000022306	22762	Zfpm2	800.909	0.325496	0.138232	-2.35471	0.0185374	0.248678
ENSMUSG00000041729	235431	Coro2b	140.046	0.441709	0.187639	-2.35404	0.0185707	0.248895
ENSMUSG00000020185	52679	E2f7	21.2768	0.508461	0.216059	-2.35335	0.0186053	0.248899
ENSMUSG00000055653	14734	Gpc3	752.651	-0.476465	0.202461	2.35337	0.0186043	0.248899
ENSMUSG00000042453	19699	Reln	457.768	-0.415731	0.176743	2.35218	0.0186639	0.249453
ENSMUSG00000052928	269037	Ctif	315.685	0.375102	0.159518	-2.35146	0.0186998	0.249703
ENSMUSG00000085925	353326	Rtl1	24.0885	0.50357	0.214295	-2.34989	0.0187789	0.250288
ENSMUSG00000041779	170829	Tram2	144.888	0.396923	0.168934	-2.34957	0.0187953	0.250288
ENSMUSG00000041737	235135	Tmem45b	16.025	-0.428088	0.182266	2.3487	0.0188391	0.250642
ENSMUSG00000024778	14102	Fas	239.178	-0.417615	0.177919	2.34721	0.0189144	0.251413
ENSMUSG00000031636	53318	Pdlim3	2584.89	-0.397908	0.169603	2.34611	0.0189704	0.251696
ENSMUSG00000006800	72043	Sulf2	4118.67	-0.329106	0.140264	2.34632	0.0189596	0.251696
ENSMUSG00000059325	74318	Hopx	6018.69	-0.378497	0.161369	2.34554	0.0189998	0.251856
ENSMUSG00000047953	14729	Gp5	20.9807	0.449648	0.192193	-2.33956	0.0193065	0.254956
ENSMUSG00000059327	13607	Eda	279.681	0.337179	0.144162	-2.33889	0.0193411	0.254956
ENSMUSG00000040950	216864	Mgl2	261.261	-0.437526	0.18709	2.33859	0.0193566	0.254956
ENSMUSG00000020077	19073	Srgn	402.471	-0.350557	0.149888	2.3388	0.0193458	0.254956
ENSMUSG00000034959	271221	5031414D18Rik	126.007	-0.442799	0.189257	2.33968	0.0193004	0.254956
ENSMUSG00000039286	72007	Fndc3b	5823.76	-0.233849	0.0999813	2.33893	0.019339	0.254956
ENSMUSG00000049411	338363	6030446N20Rik	147.407	0.405957	0.173685	-2.33732	0.0194228	0.25523
ENSMUSG00000037145	78354	2210407C18Rik	24.8875	0.477701	0.204393	-2.33717	0.0194301	0.25523
ENSMUSG00000023951	22339	Vegfa	4177.28	0.30624	0.131006	-2.33759	0.0194085	0.25523
ENSMUSG00000006715	57441	Gmnn	136.614	0.417103	0.178542	-2.33616	0.0194828	0.255689
ENSMUSG00000021200	65256	Asb2	7287.44	0.33361	0.142862	-2.3352	0.019533	0.256117
ENSMUSG00000022200	66629	Golph3	2992.93	-0.257592	0.110327	2.3348	0.0195537	0.256157
ENSMUSG00000032060	12955	Cryab	23943.9	-0.281258	0.120493	2.33422	0.019584	0.25628
ENSMUSG00000020774	11484	Aspa	209.903	-0.415459	0.178007	2.33395	0.0195984	0.25628
ENSMUSG00000026193	14268	Fn1	13892.1	-0.287671	0.123306	2.33298	0.0196491	0.256712
ENSMUSG00000024981	433256	Acsl5	1030.42	-0.332884	0.14272	2.33243	0.0196782	0.256861
ENSMUSG00000050931	74442	Sgms2	243.812	-0.433877	0.186088	2.33157	0.0197234	0.257169
ENSMUSG00000071379	53602	Hpcal1	204.623	-0.376474	0.161486	2.33131	0.0197372	0.257169
ENSMUSG00000052160	104759	Pld4	314.615	-0.389089	0.167002	2.32985	0.0198143	0.257941
ENSMUSG00000006307	75410	Wbp7	1022.82	0.327336	0.140584	-2.3284	0.0198908	0.258705
ENSMUSG00000030218	17313	Mgp	15694.8	-0.502359	0.215936	2.32643	0.0199958	0.259374
ENSMUSG00000040265	103967	Dnm3	129.611	0.434159	0.186602	-2.32666	0.0199836	0.259374
ENSMUSG00000063060	20680	Sox7	449.443	0.368695	0.158451	-2.32687	0.0199719	0.259374
ENSMUSG00000005198	20020	Polr2a	1708.17	0.387836	0.166761	-2.3257	0.0200345	0.259643
ENSMUSG00000001642	11677	Akr1b3	241.916	-0.395077	0.169938	2.32483	0.0200811	0.259939
ENSMUSG00000037363	270035	Letm2	110.526	0.398619	0.171478	-2.3246	0.0200931	0.259939
ENSMUSG00000054453	236643	Sytl5	59.3572	-0.47081	0.202585	2.32401	0.020125	0.260062
ENSMUSG00000018900	20520	Slc22a5	653.391	-0.384905	0.165663	2.32342	0.0201563	0.260062
ENSMUSG00000038065	68235	2410066E13Rik	512.599	-0.301409	0.129713	2.32366	0.0201437	0.260062
ENSMUSG00000030737	101488	Slco2b1	586.337	-0.413374	0.17795	2.32298	0.0201803	0.260139
ENSMUSG00000052613	11994	Pcdh15	279.486	-0.426941	0.183907	2.3215	0.0202598	0.260761
ENSMUSG00000032549	270192	Rab6b	125.835	-0.446732	0.192715	2.3181	0.0204441	0.260761
ENSMUSG00000061048	12560	Cdh3	196.248	-0.436144	0.188134	2.31826	0.0204354	0.260761
ENSMUSG00000020612	19084	Prkar1a	10964.9	0.352696	0.152013	-2.32017	0.0203316	0.260761
ENSMUSG00000032334	16949	Loxl1	2413.15	-0.343499	0.148052	2.32013	0.020334	0.260761
ENSMUSG00000040254	108151	Sema3d	1171.82	-0.44379	0.191441	2.31815	0.020441	0.260761
ENSMUSG00000044749	76184	Abca6	920.778	-0.350941	0.151353	2.31869	0.020412	0.260761
ENSMUSG00000038949	226744	Cnst	4199.7	0.277132	0.119408	-2.32088	0.0202932	0.260761
ENSMUSG00000029587	231866	Zfp12	532.042	-0.313472	0.135168	2.31912	0.0203884	0.260761
ENSMUSG00000050428	243867	Fbxo46	186.617	0.374589	0.161517	-2.31919	0.0203846	0.260761
ENSMUSG00000027936	74343	Crtc2	186.564	0.362944	0.156483	-2.31938	0.0203746	0.260761
ENSMUSG00000045871	239250	Slitrk6	117.442	0.464952	0.200319	-2.32106	0.0202838	0.260761
ENSMUSG00000027956	70652	Tmem144	1336.58	-0.302164	0.130453	2.31627	0.0205433	0.26088
ENSMUSG00000002058	22248	Unc119	116.079	0.401267	0.173231	-2.31637	0.0205382	0.26088
ENSMUSG00000034118	22021	Tpst1	493.572	-0.368524	0.159057	2.31693	0.0205075	0.26088
ENSMUSG00000043110	320974	Lrrn4	875.526	-0.377416	0.16294	2.31629	0.0205424	0.26088
ENSMUSG00000029166	100732	Mapre3	533.855	0.439758	0.189956	-2.31506	0.0206099	0.261497
ENSMUSG00000049672	22666	Zfp161	373.09	-0.298662	0.129104	2.31335	0.0207036	0.262457
ENSMUSG00000032580	83486	Rbm5	2059.85	0.324404	0.140255	-2.31297	0.0207245	0.262493
ENSMUSG00000037440	22361	Vnn1	29.5843	-0.497108	0.215144	2.31059	0.0208557	0.263923
ENSMUSG00000059810	50780	Rgs3	2008.98	-0.333995	0.14462	2.30946	0.0209178	0.264479
ENSMUSG00000033565	93686	Rbfox2	4505.51	0.314519	0.13645	-2.30502	0.0211655	0.267177
ENSMUSG00000073452	22759	Zfp97	36.7126	-0.488062	0.211743	2.30497	0.021168	0.267177
ENSMUSG00000028270	14469	Gbp2	1416.97	-0.432733	0.187857	2.30352	0.0212494	0.267746
ENSMUSG00000048731	70772	Ggnbp1	226.336	0.400713	0.173957	-2.30351	0.02125	0.267746
ENSMUSG00000025140	209027	Pycr1	44.2612	0.49505	0.214995	-2.30261	0.0213007	0.268153
ENSMUSG00000031665	58198	Sall1	268.954	-0.366887	0.159383	2.30192	0.0213397	0.268411
ENSMUSG00000040124	98376	Gorab	157.44	-0.355712	0.154605	2.30078	0.0214039	0.268759
ENSMUSG00000021895	71704	Arhgef3	1303.12	-0.250289	0.108785	2.30077	0.0214044	0.268759
ENSMUSG00000045875	11549	Adra1a	50.5938	-0.496849	0.216059	2.2996	0.0214706	0.269125
ENSMUSG00000073805	627214	Fam196a	95.1596	0.412659	0.179562	-2.29814	0.0215536	0.269848
ENSMUSG00000015850	229595	Adamtsl4	2871.51	0.423681	0.184401	-2.29761	0.0215841	0.269848
ENSMUSG00000020275	19696	Rel	236.982	0.346909	0.151044	-2.29674	0.0216336	0.270002
ENSMUSG00000043872	68310	Zmym1	297.133	0.403897	0.175842	-2.29694	0.0216224	0.270002
ENSMUSG00000078816	18752	Prkcc	60.4406	0.476022	0.207427	-2.29488	0.0217398	0.270656
ENSMUSG00000025272	56191	Tro	284.605	-0.342519	0.149301	2.29415	0.0217821	0.270656
ENSMUSG00000042699	13211	Dhx9	2319.35	0.288229	0.12565	-2.2939	0.0217963	0.270656
ENSMUSG00000019122	20308	Ccl9	440.108	-0.473499	0.206291	2.2953	0.021716	0.270656
ENSMUSG00000075602	110454	Ly6a	832.676	-0.361318	0.157875	2.28863	0.0221011	0.271634
ENSMUSG00000040043	56516	Rbms2	3024.69	0.309804	0.13521	-2.29128	0.0219475	0.271634
ENSMUSG00000005469	18747	Prkaca	3328.28	0.281553	0.122943	-2.29011	0.0220152	0.271634
ENSMUSG00000062661	14299	Ncs1	483.607	0.358045	0.156399	-2.2893	0.0220618	0.271634
ENSMUSG00000038994	54388	Hils1	36.2012	0.485231	0.211967	-2.28919	0.0220685	0.271634
ENSMUSG00000026603	226830	Smyd2	210.865	-0.390246	0.170441	2.28963	0.0220428	0.271634
ENSMUSG00000070666	435811	Ldlrad2	18.3558	0.491052	0.214366	-2.29071	0.0219799	0.271634
ENSMUSG00000047867	231931	Gimap6	1012.2	-0.4076	0.178085	2.28879	0.0220914	0.271634
ENSMUSG00000023993	71326	Treml1	16.7264	0.450075	0.196535	-2.29005	0.0220183	0.271634
ENSMUSG00000055305	22755	Zfp93	158.102	-0.36676	0.160254	2.28862	0.0221013	0.271634
ENSMUSG00000030020	243548	Prickle2	665.637	-0.293987	0.128392	2.28975	0.0220357	0.271634
ENSMUSG00000042436	76293	Mfap4	1486.42	-0.387247	0.169356	2.28658	0.0222202	0.272865
ENSMUSG00000022885	20440	St6gal1	1035.52	-0.366658	0.160459	2.28506	0.0223091	0.273385
ENSMUSG00000022973	104015	Synj1	1168.19	0.296916	0.129946	-2.28492	0.0223176	0.273385
ENSMUSG00000028560	230484	Usp1	504.855	-0.330808	0.14478	2.28489	0.022319	0.273385
ENSMUSG00000032782	216846	Cntrob	170.395	0.353421	0.154935	-2.2811	0.0225427	0.273385
ENSMUSG00000027469	72119	Tpx2	43.8456	0.486165	0.212929	-2.28323	0.022417	0.273385
ENSMUSG00000027978	19142	Prss12	110.427	-0.432229	0.189527	2.28057	0.0225738	0.273385
ENSMUSG00000051650	53625	B3gnt2	670.007	-0.330755	0.144905	2.28256	0.0224566	0.273385
ENSMUSG00000002266	22776	Zim1	60.9712	0.47409	0.207583	-2.28385	0.0223801	0.273385
ENSMUSG00000064210	105722	Ano6	1701.43	-0.274382	0.120229	2.28216	0.0224802	0.273385
ENSMUSG00000026748	67448	Plxdc2	1064.25	-0.363903	0.159577	2.28042	0.0225827	0.273385
ENSMUSG00000016256	64138	Ctsz	1007.97	-0.299054	0.131081	2.28144	0.0225224	0.273385
ENSMUSG00000034532	50759	Fbxo16	39.5064	0.489344	0.214495	-2.28137	0.0225263	0.273385
ENSMUSG00000021234	217705	Fam161b	261.411	0.34616	0.1517	-2.28188	0.0224966	0.273385
ENSMUSG00000033863	16601	Klf9	5614.59	-0.425071	0.186197	2.28291	0.0224359	0.273385
ENSMUSG00000041920	104681	Slc16a6	227.096	0.353018	0.154835	-2.27997	0.0226095	0.273481
ENSMUSG00000046402	19659	Rbp1	984.11	-0.381189	0.167243	2.27926	0.0226517	0.273762
ENSMUSG00000074824	432770	Zfp708	63.39	0.437351	0.191949	-2.27847	0.0226986	0.273762
ENSMUSG00000041915	225339	Ammecr1l	1017.27	0.278812	0.122411	-2.27768	0.0227459	0.273762
ENSMUSG00000020135	23805	Apc2	595.777	0.454234	0.19933	-2.27881	0.0226783	0.273762
ENSMUSG00000020032	77976	Nuak1	1970.33	-0.331298	0.145451	2.27772	0.0227432	0.273762
ENSMUSG00000024759	109168	Atl3	2213.04	-0.283921	0.124646	2.27782	0.0227374	0.273762
ENSMUSG00000059878	67255	Zfp422	336.234	-0.3255	0.142974	2.27664	0.0228074	0.274275
ENSMUSG00000027222	18633	Pex16	295.829	-0.3823	0.168024	2.27528	0.0228894	0.275033
ENSMUSG00000020483	68097	Dynll2	3807.71	0.351286	0.154458	-2.27432	0.022947	0.275269
ENSMUSG00000057440	75739	Mpp7	827.945	-0.417223	0.183752	2.27057	0.0231729	0.277053
ENSMUSG00000050675	14723	Gp1ba	63.9092	0.458116	0.201773	-2.27045	0.0231805	0.277053
ENSMUSG00000024712	54391	Rfk	1234.23	-0.274121	0.120744	2.27027	0.0231911	0.277053
ENSMUSG00000034300	66306	Fam53c	509.416	0.284523	0.125323	-2.27031	0.0231885	0.277053
ENSMUSG00000035632	232791	Cnot3	297.185	0.345464	0.152229	-2.26937	0.023246	0.27748
ENSMUSG00000015365	83456	Mov10l1	554.509	0.364427	0.160626	-2.26879	0.023281	0.277668
ENSMUSG00000033883	241944	D3Ertd254e	691.733	-0.279715	0.123305	2.26848	0.0233	0.277668
ENSMUSG00000066640	231863	Fbxl18	152.391	0.396926	0.175037	-2.26767	0.0233494	0.278028
ENSMUSG00000003161	109552	Sri	903.561	-0.340492	0.150185	2.26715	0.023381	0.278176
ENSMUSG00000025001	15201	Hells	44.6196	0.481507	0.21245	-2.26644	0.0234242	0.278462
ENSMUSG00000074059	546161	Fbxw18	330.992	-0.428517	0.189108	2.26599	0.0234521	0.278565
ENSMUSG00000035202	102436	Lars2	7721	0.354363	0.156457	-2.26493	0.0235172	0.278882
ENSMUSG00000020814	67622	Mxra7	363.516	-0.339076	0.149692	2.26515	0.0235032	0.278882
ENSMUSG00000049241	243270	Gpr81	17.129	-0.479047	0.211557	2.26439	0.0235499	0.278981
ENSMUSG00000026697	17926	Myoc	53.8024	-0.480646	0.212284	2.26417	0.0235639	0.278981
ENSMUSG00000073555	240327	Gm4951	33.2877	-0.488764	0.216045	2.26233	0.023677	0.280091
ENSMUSG00000021280	74190	1200009I06Rik	209.611	0.475644	0.210356	-2.26114	0.0237508	0.280352
ENSMUSG00000006276	13859	Eps15l1	1441.46	0.259866	0.114932	-2.26104	0.023757	0.280352
ENSMUSG00000034997	15558	Htr2a	24.8154	-0.488091	0.21586	2.26115	0.02375	0.280352
ENSMUSG00000049323	237782	Smcr8	1520.47	0.278797	0.123352	-2.26016	0.0238111	0.280762
ENSMUSG00000034161	20289	Scx	21.6007	0.488129	0.21604	-2.25944	0.023856	0.281027
ENSMUSG00000025856	18590	Pdgfa	335.589	0.372969	0.165109	-2.25893	0.0238875	0.281027
ENSMUSG00000031286	320302	Glt28d2	262.574	0.344282	0.152424	-2.25871	0.0239012	0.281027
ENSMUSG00000040189	211535	Ccdc114	53.2577	0.46539	0.206147	-2.25756	0.0239729	0.281299
ENSMUSG00000038780	75788	Smurf1	1408.93	0.338086	0.149743	-2.25777	0.0239599	0.281299
ENSMUSG00000019082	68267	Slc25a22	426.414	-0.416601	0.184565	2.25721	0.0239948	0.281329
ENSMUSG00000033671	74081	Cep350	3498.67	0.266063	0.117898	-2.25673	0.0240249	0.281454
ENSMUSG00000030376	110891	Slc8a2	18.6613	0.477318	0.211544	-2.25635	0.0240489	0.281508
ENSMUSG00000004032	14866	Gstm5	1387.64	-0.271115	0.120258	2.25444	0.0241684	0.281997
ENSMUSG00000028251	77032	2610029I01Rik	533.245	0.325879	0.144534	-2.25469	0.024153	0.281997
ENSMUSG00000034928	105239	Rnf44	850.871	0.371267	0.164682	-2.25444	0.0241682	0.281997
ENSMUSG00000031283	83453	Chrdl1	190.395	-0.464147	0.205909	2.25413	0.024188	0.281999
ENSMUSG00000020431	432530	Adcy1	5783.85	0.325648	0.144578	-2.2524	0.0242968	0.282933
ENSMUSG00000025782	209361	Taf3	345.44	0.298888	0.132771	-2.25114	0.0243764	0.283285
ENSMUSG00000028760	230861	Eif4g3	2757.24	0.276193	0.122686	-2.25121	0.0243721	0.283285
ENSMUSG00000021039	66354	Snw1	1607.03	-0.278058	0.123639	2.24895	0.0245158	0.284032
ENSMUSG00000020057	71712	Dram1	283.242	-0.387584	0.172385	2.24836	0.0245532	0.284032
ENSMUSG00000000402	54156	Egfl6	15.8472	-0.461312	0.205184	2.24828	0.0245581	0.284032
ENSMUSG00000005268	19116	Prlr	352.268	0.441703	0.196394	-2.24907	0.0245079	0.284032
ENSMUSG00000032288	102462	Imp3	656.466	-0.290646	0.129332	2.24729	0.0246213	0.284179
ENSMUSG00000055053	18029	Nfic	3362.57	0.372692	0.16585	-2.24717	0.0246295	0.284179
ENSMUSG00000047037	233280	Nipa1	210.543	0.387472	0.172417	-2.2473	0.0246208	0.284179
ENSMUSG00000051550	68490	Zfp579	1006.62	0.403524	0.179596	-2.24684	0.0246503	0.284193
ENSMUSG00000044646	207259	Zbtb7c	202.085	-0.413689	0.184173	2.2462	0.0246915	0.284442
ENSMUSG00000029594	74111	Rbm19	875.074	-0.319119	0.142123	2.24537	0.0247442	0.284824
ENSMUSG00000054920	71778	Klhl5	547.295	-0.338342	0.150757	2.24429	0.0248136	0.285395
ENSMUSG00000074994	99003	Qser1	2807.8	0.328028	0.146318	-2.24188	0.0249688	0.286727
ENSMUSG00000029994	11746	Anxa4	814.591	-0.254711	0.113605	2.24208	0.0249559	0.286727
ENSMUSG00000056947	17116	Mab21l1	34.5893	0.470243	0.209866	-2.24068	0.025047	0.287397
ENSMUSG00000031532	67887	Tmem66	6212.15	-0.333004	0.148687	2.23964	0.0251144	0.287942
ENSMUSG00000042632	53357	Pla2g6	336.821	0.370366	0.165524	-2.23754	0.0252513	0.288828
ENSMUSG00000032217	93836	Rnf111	950.515	0.285164	0.127422	-2.23796	0.0252237	0.288828
ENSMUSG00000049550	56430	Clip1	7937.27	-0.277616	0.124061	2.23774	0.0252378	0.288828
ENSMUSG00000029131	23950	Dnajb6	281.724	0.303808	0.135816	-2.23691	0.0252922	0.289068
ENSMUSG00000032537	270190	Ephb1	74.6998	0.414078	0.185298	-2.23466	0.0254394	0.28987
ENSMUSG00000031838	65972	Ifi30	339.715	-0.364	0.162886	2.23469	0.0254379	0.28987
ENSMUSG00000047793	208777	Sned1	729.376	0.315301	0.141097	-2.23465	0.0254407	0.28987
ENSMUSG00000019942	12534	Cdk1	44.2625	0.482841	0.216073	-2.23462	0.0254423	0.28987
ENSMUSG00000028381	22234	Ugcg	875.164	0.277175	0.124082	-2.23381	0.0254957	0.290252
ENSMUSG00000037795	333789	N4bp2	1065.75	0.323264	0.14479	-2.23263	0.025573	0.290448
ENSMUSG00000041261	12319	Car8	779.327	-0.376034	0.168418	2.23274	0.0255658	0.290448
ENSMUSG00000030447	20430	Cyfip1	2797.46	-0.286605	0.128336	2.23324	0.0255332	0.290448
ENSMUSG00000054675	231633	Tmem119	929.015	-0.433836	0.19438	2.2319	0.0256216	0.290772
ENSMUSG00000038879	223473	Nipal2	56.2204	-0.432792	0.194164	2.229	0.0258137	0.291357
ENSMUSG00000030786	16409	Itgam	225.659	-0.369474	0.165682	2.23002	0.0257463	0.291357
ENSMUSG00000032942	22229	Ucp3	354.378	-0.354477	0.158977	2.22974	0.0257649	0.291357
ENSMUSG00000027739	19338	Rab33b	515.265	-0.305849	0.137189	2.2294	0.0257875	0.291357
ENSMUSG00000055421	211712	Pcdh9	283.03	-0.354872	0.159191	2.22922	0.0257993	0.291357
ENSMUSG00000031309	110651	Rps6ka3	967.844	0.284158	0.127505	-2.2286	0.0258406	0.291411
ENSMUSG00000000278	74617	Scpep1	731.551	-0.291832	0.130965	2.22833	0.0258586	0.291411
ENSMUSG00000045757	233893	Zfp764	125.309	-0.390465	0.175275	2.22772	0.025899	0.291641
ENSMUSG00000021555	78689	Naa35	1400.5	0.267699	0.120283	-2.22557	0.0260429	0.292353
ENSMUSG00000034173	71970	2410018M08Rik	24.0408	-0.480972	0.216071	2.22599	0.026015	0.292353
ENSMUSG00000017466	21858	Timp2	6676.35	-0.241684	0.108594	2.22558	0.0260426	0.292353
ENSMUSG00000031906	58994	Smpd3	764.615	-0.368133	0.165502	2.22435	0.026125	0.292376
ENSMUSG00000026712	17533	Mrc1	3811.84	-0.316238	0.142155	2.2246	0.0261079	0.292376
ENSMUSG00000029287	21814	Tgfbr3	4731.03	-0.229575	0.10318	2.225	0.0260814	0.292376
ENSMUSG00000051977	213389	Prdm9	65.886	0.42067	0.189152	-2.22398	0.0261497	0.292422
ENSMUSG00000052688	226421	5430435G22Rik	257.329	-0.36954	0.166208	2.22336	0.0261917	0.292665
ENSMUSG00000038984	239364	Tspyl5	427.766	-0.334231	0.15054	2.22021	0.0264043	0.293112
ENSMUSG00000070867	666048	Gm12824	758.29	0.407047	0.183393	-2.21953	0.0264509	0.293112
ENSMUSG00000026156	280645	B3gat2	60.2443	0.460167	0.207116	-2.22178	0.0262982	0.293112
ENSMUSG00000028337	107684	Coro2a	19.5447	-0.478543	0.215686	2.2187	0.0265074	0.293112
ENSMUSG00000040746	70510	Rnf167	1191.89	-0.256577	0.115463	2.22215	0.0262733	0.293112
ENSMUSG00000039910	17684	Cited2	350.793	-0.399568	0.180075	2.2189	0.0264936	0.293112
ENSMUSG00000071324	213402	Armc2	575.991	-0.318939	0.143627	2.2206	0.0263778	0.293112
ENSMUSG00000024251	240174	Thada	1027.52	0.262967	0.118337	-2.22218	0.0262709	0.293112
ENSMUSG00000037855	216049	Zfp365	72.864	-0.432577	0.194943	2.21899	0.0264873	0.293112
ENSMUSG00000085793	217708	Lin52	223.106	-0.342258	0.154078	2.22133	0.0263286	0.293112
ENSMUSG00000027933	229543	Ints3	1293.2	0.306237	0.137921	-2.22037	0.0263935	0.293112
ENSMUSG00000039713	269608	Plekhg5	924.591	0.339262	0.152917	-2.21859	0.0265144	0.293112
ENSMUSG00000021750	268709	Fam107a	481.984	-0.477284	0.214942	2.22052	0.0263833	0.293112
ENSMUSG00000037465	21847	Klf10	1039.45	-0.361543	0.163032	2.21762	0.0265809	0.293624
ENSMUSG00000046034	432940	Fam105b	562.494	-0.33727	0.15211	2.21727	0.0266045	0.293661
ENSMUSG00000004980	53379	Hnrnpa2b1	5231.44	0.231476	0.104442	-2.2163	0.0266709	0.29417
ENSMUSG00000061535	109323	C1qtnf7	610.401	-0.399043	0.180138	2.21521	0.0267458	0.294361
ENSMUSG00000028649	11426	Macf1	32667.1	0.23482	0.106043	-2.21438	0.0268028	0.294361
ENSMUSG00000025650	12836	Col7a1	30.375	0.474023	0.2141	-2.21403	0.026827	0.294361
ENSMUSG00000025425	225742	St8sia5	51.8025	0.466365	0.210608	-2.21437	0.0268032	0.294361
ENSMUSG00000047875	269604	Gpr157	664.89	0.399559	0.180421	-2.2146	0.0267875	0.294361
ENSMUSG00000024665	56473	Fads2	267.992	-0.30619	0.138265	2.21452	0.0267928	0.294361
ENSMUSG00000033361	208748	Prrg3	335.305	0.347986	0.157218	-2.21339	0.0268707	0.294361
ENSMUSG00000028049	24045	Scamp3	556.157	0.366555	0.1656	-2.2135	0.0268631	0.294361
ENSMUSG00000072770	54137	Acrbp	55.3986	0.436575	0.197318	-2.21254	0.0269292	0.294708
ENSMUSG00000038914	23856	Dido1	3384.66	0.242435	0.109583	-2.21234	0.026943	0.294708
ENSMUSG00000041477	319618	Dcp1b	92.4401	0.395668	0.178881	-2.21191	0.0269726	0.29481
ENSMUSG00000016386	77015	Mpped2	45.1448	0.446578	0.201972	-2.21109	0.0270299	0.295214
ENSMUSG00000042050	217935	Wdr60	204.062	-0.369829	0.167335	2.21011	0.0270974	0.295507
ENSMUSG00000006931	66180	Leprel4	997.655	-0.331565	0.150008	2.21031	0.0270836	0.295507
ENSMUSG00000028127	19299	Abcd3	3125.17	-0.245874	0.111368	2.20777	0.0272604	0.29706
ENSMUSG00000022270	66270	Fam134b	6033.46	-0.381267	0.172765	2.20686	0.0273241	0.297531
ENSMUSG00000031644	18004	Nek1	904.131	0.304991	0.138259	-2.20593	0.0273886	0.297995
ENSMUSG00000054792	270201	Klhl18	430.583	0.328155	0.148779	-2.20566	0.0274077	0.297995
ENSMUSG00000050677	66717	Ccdc96	21.8914	0.476332	0.216029	-2.20494	0.0274582	0.298155
ENSMUSG00000020847	380714	Rph3al	68.78	0.428589	0.194383	-2.20487	0.0274635	0.298155
ENSMUSG00000035284	320528	Vps13c	4896.77	0.30458	0.13821	-2.20375	0.0275421	0.298506
ENSMUSG00000037138	16764	Aff3	384.395	-0.319231	0.144897	2.20316	0.0275834	0.298506
ENSMUSG00000028766	11647	Alpl	269.276	0.327384	0.148599	-2.20314	0.0275847	0.298506
ENSMUSG00000035901	19347	Dennd5a	8560.54	-0.259237	0.117642	2.20362	0.0275514	0.298506
ENSMUSG00000023036	93711	Pcdhga9	147.668	0.349621	0.1588	-2.20165	0.0276902	0.299273
ENSMUSG00000060791	100040018	Gmfg	36.6932	-0.46589	0.211658	2.20114	0.0277259	0.299313
ENSMUSG00000004151	14009	Etv1	537.802	0.405848	0.184391	-2.20101	0.0277352	0.299313
ENSMUSG00000054728	218194	Phactr1	735.008	0.393413	0.178812	-2.20015	0.0277965	0.299752
ENSMUSG00000031015	20947	Swap70	840.199	-0.304008	0.138196	2.19983	0.027819	0.299772
ENSMUSG00000056367	242894	Actr3b	425.19	0.323602	0.147129	-2.19945	0.0278463	0.299843
ENSMUSG00000025935	72265	Tram1	3080.27	-0.303478	0.138061	2.19815	0.0279387	0.300392
ENSMUSG00000053580	77097	Tanc2	1164.59	0.283282	0.128856	-2.19843	0.0279182	0.300392
ENSMUSG00000064215	52668	Ifi27l1	803.638	-0.292057	0.132887	2.19778	0.0279648	0.300451
ENSMUSG00000039934	212167	Pion	128.92	0.389071	0.177094	-2.19697	0.0280229	0.300645
ENSMUSG00000016128	243362	Stard13	2562.52	-0.262925	0.119677	2.19695	0.0280243	0.300645
ENSMUSG00000039126	353211	Prune2	1476.36	0.474385	0.216072	-2.19549	0.0281285	0.30154
ENSMUSG00000030733	20399	Sh2b1	1152.9	0.351861	0.160351	-2.19432	0.0282122	0.301945
ENSMUSG00000027495	67017	2010011I20Rik	232.35	-0.352081	0.160436	2.19452	0.0281977	0.301945
ENSMUSG00000026918	67382	Brd3	969.178	0.259449	0.118249	-2.19409	0.0282287	0.301945
ENSMUSG00000074570	320664	Cass4	21.7759	0.473646	0.21595	-2.19331	0.0282847	0.302321
ENSMUSG00000041757	240753	Plekha6	4572.05	0.313704	0.143087	-2.1924	0.0283509	0.302583
ENSMUSG00000037210	231128	Fam193a	1253	0.243222	0.111065	-2.1899	0.0285313	0.303901
ENSMUSG00000050592	241303	Fam78a	668.102	0.424668	0.193896	-2.19018	0.028511	0.303901
ENSMUSG00000051747	22138	Ttn	2.18562e+06	0.243997	0.111423	-2.18982	0.0285372	0.303901
ENSMUSG00000040653	76142	Ppp1r14c	3326.37	0.364126	0.166436	-2.18778	0.0286857	0.305035
ENSMUSG00000053985	243906	Zfp14	193.343	0.366944	0.167703	-2.18805	0.028666	0.305035
ENSMUSG00000020424	71962	Gatsl3	153.738	-0.396544	0.181297	2.18726	0.0287237	0.305215
ENSMUSG00000059851	232811	Suv420h2	235.257	0.409621	0.187355	-2.18633	0.0287914	0.30566
ENSMUSG00000003119	69131	Cdk12	1685.68	0.262275	0.119973	-2.18611	0.0288076	0.30566
ENSMUSG00000039218	75956	Srrm2	10002.7	0.297455	0.136092	-2.1857	0.0288377	0.305755
ENSMUSG00000029757	13426	Dync1i1	22.4617	-0.470463	0.215466	2.18347	0.0290012	0.306435
ENSMUSG00000046718	69550	Bst2	285.107	-0.41304	0.189174	2.18339	0.0290073	0.306435
ENSMUSG00000023972	71461	Ptk7	568.371	-0.280656	0.128538	2.18344	0.0290037	0.306435
ENSMUSG00000020956	328092	6530401N04Rik	168.504	-0.341481	0.156373	2.18376	0.02898	0.306435
ENSMUSG00000033054	244879	Npat	826.985	-0.297009	0.136051	2.18307	0.0290305	0.306457
ENSMUSG00000029924	72144	Slc37a3	748.463	0.25345	0.116139	-2.1823	0.0290873	0.306833
ENSMUSG00000001870	268977	Ltbp1	4300.95	-0.266474	0.122191	2.1808	0.0291985	0.306891
ENSMUSG00000064128	219103	Cenpj	204.064	0.361668	0.165783	-2.18157	0.0291409	0.306891
ENSMUSG00000027706	69276	Sec62	3026.97	-0.269276	0.123454	2.18118	0.0291699	0.306891
ENSMUSG00000062929	12632	Cfl2	9094.35	-0.302529	0.138721	2.18085	0.0291947	0.306891
ENSMUSG00000024533	68166	Spire1	232.357	-0.364011	0.166865	2.18147	0.029149	0.306891
ENSMUSG00000050953	14609	Gja1	12124.9	0.313114	0.143643	-2.1798	0.0292722	0.307248
ENSMUSG00000025094	214084	Slc18a2	309.365	-0.351376	0.161297	2.17843	0.0293737	0.308063
ENSMUSG00000028555	230603	Ttc39a	119.057	0.357805	0.164389	-2.17658	0.0295119	0.308493
ENSMUSG00000001052	99683	Sec24b	1122.8	0.279206	0.128238	-2.17726	0.0294614	0.308493
ENSMUSG00000020029	71207	Nudt4	34738.5	-0.257995	0.118522	2.17677	0.0294979	0.308493
ENSMUSG00000025738	214931	Fbxl16	168.181	0.419768	0.192883	-2.17629	0.0295339	0.308493
ENSMUSG00000024873	12794	Cnih2	31.9817	0.4614	0.211902	-2.17742	0.0294489	0.308493
ENSMUSG00000030790	11535	Adm	217.518	-0.415154	0.190773	2.17617	0.0295423	0.308493
ENSMUSG00000030282	12764	Cmas	956.614	-0.269436	0.12387	2.17516	0.0296183	0.308497
ENSMUSG00000040234	67623	Tm7sf3	1432.62	-0.253791	0.11676	2.17362	0.0297338	0.308497
ENSMUSG00000035000	13482	Dpp4	1511.3	-0.385706	0.177381	2.17445	0.0296716	0.308497
ENSMUSG00000026779	67121	Mastl	38.9918	0.464518	0.213704	-2.17366	0.029731	0.308497
ENSMUSG00000029004	69188	Mll5	2627.63	0.273148	0.125622	-2.17437	0.029677	0.308497
ENSMUSG00000020542	214384	Myocd	3534.99	0.316669	0.145604	-2.17487	0.0296402	0.308497
ENSMUSG00000033644	57746	Piwil2	32.3696	0.460087	0.211507	-2.17528	0.0296089	0.308497
ENSMUSG00000064302	76707	Clasp1	11776.9	0.27666	0.127305	-2.1732	0.029765	0.308599
ENSMUSG00000006127	19062	Inpp5k	839.461	-0.261589	0.120397	2.17272	0.0298015	0.308757
ENSMUSG00000087651	69784	1500009L16Rik	37.027	-0.464938	0.214235	2.17022	0.02999	0.310047
ENSMUSG00000078580	101604	E430018J23Rik	135.478	-0.39189	0.180602	2.16991	0.0300137	0.31007
ENSMUSG00000030617	75338	Ccdc83	29.9539	-0.468672	0.216059	2.16918	0.0300689	0.31042
ENSMUSG00000024168	407831	Tmem204	902.33	-0.343496	0.158386	2.16872	0.0301037	0.310558
ENSMUSG00000027775	66868	Mfsd1	959.713	-0.255492	0.117851	2.16792	0.0301644	0.310963
ENSMUSG00000040550	72201	Otud6b	1094.13	-0.256947	0.118543	2.16755	0.0301929	0.311036
ENSMUSG00000042567	674895	Nek10	24.0497	-0.462385	0.21337	2.16706	0.0302306	0.311204
ENSMUSG00000039167	170757	Eltd1	1455.17	-0.296138	0.136734	2.16579	0.0303271	0.311575
ENSMUSG00000036040	77794	Adamtsl2	2198.39	-0.42525	0.196353	2.16574	0.030331	0.311575
ENSMUSG00000063160	18223	Numbl	309.242	-0.357422	0.165008	2.16609	0.0303044	0.311575
ENSMUSG00000003378	14809	Grik5	261.389	0.375288	0.173327	-2.1652	0.030372	0.311775
ENSMUSG00000026600	20652	Soat1	706.079	-0.302498	0.139777	2.16415	0.0304528	0.312353
ENSMUSG00000035385	20296	Ccl2	37.6741	0.467043	0.215833	-2.16391	0.0304714	0.312353
ENSMUSG00000037260	52120	Hgsnat	757.997	-0.284	0.131295	2.16308	0.0305352	0.312787
ENSMUSG00000000881	53310	Dlg3	268.245	-0.329306	0.152266	2.16271	0.0305636	0.312809
ENSMUSG00000037370	18605	Enpp1	638.485	-0.347916	0.160908	2.16221	0.0306021	0.312809
ENSMUSG00000031133	73341	Arhgef6	2566.1	-0.270616	0.125148	2.16237	0.0305898	0.312809
ENSMUSG00000073725	68421	Lmbrd1	1709.8	-0.271029	0.125371	2.16181	0.0306326	0.312901
ENSMUSG00000041852	21411	Tcf20	4909.2	-0.22205	0.10279	2.16023	0.0307545	0.313925
ENSMUSG00000013236	19280	Ptprs	4300.6	0.318819	0.14769	-2.1587	0.0308734	0.31417
ENSMUSG00000052414	223922	Atf7	379.44	0.300107	0.139001	-2.15903	0.0308478	0.31417
ENSMUSG00000045672	373864	Col27a1	215.66	0.414224	0.191901	-2.15853	0.0308867	0.31417
ENSMUSG00000050052	72148	2610019F03Rik	122.52	-0.398063	0.184356	2.15921	0.030834	0.31417
ENSMUSG00000042766	360213	Trim46	62.3982	0.436207	0.202079	-2.15859	0.0308817	0.31417
ENSMUSG00000026723	13434	Trdmt1	276.539	-0.346795	0.160742	2.15746	0.0309697	0.314794
ENSMUSG00000026834	269275	Acvr1c	19.6689	-0.438711	0.203433	2.15653	0.0310419	0.314866
ENSMUSG00000028826	66146	Tmem57	2081.4	-0.265647	0.123158	2.15696	0.0310084	0.314866
ENSMUSG00000027238	228564	Frmd5	4662.46	0.370023	0.171566	-2.15674	0.031026	0.314866
ENSMUSG00000032320	26611	Rcn2	1124	-0.252288	0.117082	2.15479	0.031178	0.314958
ENSMUSG00000026683	66977	Nuf2	19.4432	0.453156	0.210332	-2.15448	0.0312029	0.314958
ENSMUSG00000019102	11670	Aldh3a1	97.2741	-0.446975	0.207321	2.15595	0.0310872	0.314958
ENSMUSG00000066568	67070	Lsm14a	1531.04	0.24185	0.112245	-2.15466	0.0311884	0.314958
ENSMUSG00000027953	19729	Slc50a1	439.96	-0.293154	0.136056	2.15465	0.0311889	0.314958
ENSMUSG00000048191	353328	Muc6	21.4128	0.464526	0.21552	-2.15538	0.0311325	0.314958
ENSMUSG00000070643	20668	Sox13	501.329	0.306517	0.142292	-2.15414	0.0312294	0.315007
ENSMUSG00000019850	21929	Tnfaip3	158.806	-0.388634	0.180455	2.15364	0.0312687	0.315184
ENSMUSG00000054966	74071	Ifltd1	18.5463	0.464092	0.215657	-2.15199	0.0313979	0.315829
ENSMUSG00000040287	237611	Stac3	18.2104	0.462099	0.214821	-2.15108	0.0314696	0.315851
ENSMUSG00000078954	73167	Arhgap8	22.7817	0.462162	0.21488	-2.15079	0.0314931	0.315851
ENSMUSG00000044340	98432	Phlpp1	1207.31	0.250936	0.116668	-2.15086	0.031487	0.315851
ENSMUSG00000037455	76306	1110021L09Rik	141.566	0.378543	0.176018	-2.15059	0.0315089	0.315851
ENSMUSG00000023088	17250	Abcc1	1508.74	-0.24229	0.112629	2.15122	0.0314589	0.315851
ENSMUSG00000037259	241688	6330439K17Rik	77.9086	0.41728	0.194095	-2.14987	0.0315652	0.316004
ENSMUSG00000022014	108670	Epsti1	63.754	-0.420053	0.195438	2.14929	0.0316113	0.316004
ENSMUSG00000002409	13549	Dyrk1b	607.68	0.381723	0.177587	-2.1495	0.0315947	0.316004
ENSMUSG00000063919	68955	Srrm4	101.052	0.443949	0.206622	-2.1486	0.0316658	0.316113
ENSMUSG00000063142	16531	Kcnma1	39.0283	0.461431	0.214738	-2.14881	0.0316498	0.316113
ENSMUSG00000038145	20623	Snrk	2260.44	-0.340874	0.158705	2.14785	0.0317258	0.316406
ENSMUSG00000042788	329831	Fam166b	19.2951	0.464045	0.216067	-2.14769	0.0317387	0.316406
ENSMUSG00000041992	217944	Rapgef5	1708.41	-0.34457	0.160516	2.14665	0.0318215	0.316417
ENSMUSG00000025931	74229	Paqr8	139.522	-0.404022	0.188269	2.14598	0.0318749	0.316417
ENSMUSG00000026479	16782	Lamc2	331.803	-0.424159	0.197673	2.14576	0.0318924	0.316417
ENSMUSG00000045038	18754	Prkce	875.459	0.284073	0.132366	-2.14612	0.0318634	0.316417
ENSMUSG00000032657	68521	Fam189b	91.2804	0.442821	0.206299	-2.1465	0.031833	0.316417
ENSMUSG00000041040	72750	Fam117b	905.394	-0.387576	0.18055	2.14665	0.0318213	0.316417
ENSMUSG00000017446	56745	C1qtnf1	356.173	-0.32064	0.149395	2.14626	0.0318525	0.316417
ENSMUSG00000029406	19679	Pitpnm2	1522.28	0.360332	0.167993	-2.14493	0.0319584	0.316855
ENSMUSG00000045671	114716	Spred2	405.03	0.346596	0.161648	-2.14414	0.032022	0.317179
ENSMUSG00000064127	26896	Med14	1462.12	0.253339	0.118163	-2.14398	0.0320347	0.317179
ENSMUSG00000037904	74251	Ankrd9	1050.58	-0.330323	0.154146	2.14292	0.0321197	0.317803
ENSMUSG00000025701	11689	Alox5	411.987	-0.416091	0.19423	2.14226	0.0321724	0.318052
ENSMUSG00000006498	19205	Ptbp1	832.811	-0.297001	0.138652	2.14206	0.0321887	0.318052
ENSMUSG00000067653	78321	Ankrd23	1997.73	-0.453952	0.212301	2.13824	0.032497	0.318912
ENSMUSG00000015340	13058	Cybb	284.296	-0.401787	0.187951	2.13772	0.0325394	0.318912
ENSMUSG00000070733	72313	Fryl	4301.31	0.27196	0.127165	-2.13864	0.0324652	0.318912
ENSMUSG00000032372	18828	Plscr2	371.758	-0.366353	0.171225	2.13961	0.0323866	0.318912
ENSMUSG00000015312	17873	Gadd45b	133.98	-0.405351	0.189409	2.14008	0.0323482	0.318912
ENSMUSG00000038538	320538	Ubn2	2394.42	0.264413	0.12365	-2.1384	0.0324841	0.318912
ENSMUSG00000040093	171543	Bmf	321.733	-0.381402	0.178395	2.13797	0.0325193	0.318912
ENSMUSG00000054874	104401	Pcnxl3	1127.01	0.386912	0.180894	-2.13889	0.0324449	0.318912
ENSMUSG00000024727	225997	Trpm6	44.2437	-0.451911	0.211392	2.13779	0.0325338	0.318912
ENSMUSG00000046096	233812	BC030336	1174.25	-0.313369	0.146401	2.14049	0.0323153	0.318912
ENSMUSG00000042625	224902	Safb2	743.924	0.321425	0.150481	-2.13598	0.0326811	0.320085
ENSMUSG00000019990	29863	Pde7b	1038.13	-0.25525	0.119548	2.13513	0.0327501	0.320544
ENSMUSG00000036218	239618	Pdzrn4	389.808	0.363807	0.170436	-2.13457	0.0327962	0.32078
ENSMUSG00000004661	56380	Arid3b	64.2147	0.432893	0.202896	-2.13357	0.0328782	0.321155
ENSMUSG00000024542	70799	Cep192	517.269	0.303206	0.142113	-2.13356	0.0328789	0.321155
ENSMUSG00000050919	238803	Zfp366	192.003	0.349557	0.163905	-2.13268	0.0329512	0.321429
ENSMUSG00000034898	70598	Filip1	4040.01	-0.289699	0.135888	2.1319	0.0330148	0.321833
ENSMUSG00000067879	76982	3110035E14Rik	20.2408	0.45705	0.214445	-2.13131	0.0330633	0.32209
ENSMUSG00000022871	59083	Fetub	20.499	-0.458947	0.215436	2.13032	0.0331453	0.32224
ENSMUSG00000026463	381290	Atp2b4	2911.44	-0.319502	0.149967	2.13048	0.0331321	0.32224
ENSMUSG00000027006	66861	Dnajc10	4239.82	-0.249303	0.117002	2.13076	0.033109	0.32224
ENSMUSG00000037822	68552	1110003E01Rik	2186.4	-0.222456	0.104473	2.12931	0.0332287	0.322535
ENSMUSG00000032419	76365	Tbx18	509.377	-0.326079	0.153136	2.12934	0.0332259	0.322535
ENSMUSG00000041598	56699	Cdc42ep4	663.33	-0.328776	0.154475	2.12834	0.033309	0.322535
ENSMUSG00000026674	18214	Ddr2	4056.44	-0.337747	0.158683	2.12844	0.0333006	0.322535
ENSMUSG00000030655	233789	Smg1	5856.62	0.259219	0.121764	-2.12887	0.0332647	0.322535
ENSMUSG00000090394	67647	4930523C07Rik	590.84	-0.365943	0.172032	2.12718	0.0334053	0.323252
ENSMUSG00000020151	19279	Ptprr	19.6018	-0.459511	0.216072	2.12666	0.0334483	0.323452
ENSMUSG00000014418	246694	Hps5	531.068	0.273205	0.128533	-2.12556	0.0335396	0.323904
ENSMUSG00000043067	244745	Dpy19l1	668.072	-0.312076	0.146816	2.12563	0.0335343	0.323904
ENSMUSG00000049872	103511	Fam26e	137.055	-0.415677	0.195617	2.12495	0.0335906	0.323965
ENSMUSG00000067825	74043	Pex26	281.875	0.340083	0.160165	-2.12333	0.0337261	0.324399
ENSMUSG00000035314	233552	Gdpd5	748.638	0.287828	0.135532	-2.12369	0.0336965	0.324399
ENSMUSG00000050830	319922	Vwc2	160.686	-0.362822	0.170958	2.12228	0.0338143	0.324399
ENSMUSG00000068284	207806	Gm608	1976.66	0.278525	0.131232	-2.12239	0.033805	0.324399
ENSMUSG00000039607	207181	Rbms3	1724.25	-0.29012	0.13668	2.12261	0.0337864	0.324399
ENSMUSG00000031504	19332	Rab20	206.809	-0.364272	0.171594	2.12287	0.033765	0.324399
ENSMUSG00000091712	665119	Sec14l5	105.718	0.442533	0.208459	-2.12288	0.0337642	0.324399
ENSMUSG00000028410	15502	Dnaja1	648.546	0.39868	0.187918	-2.12157	0.0338741	0.324532
ENSMUSG00000007670	16549	Khsrp	1309.66	0.32466	0.153104	-2.12053	0.0339615	0.324532
ENSMUSG00000033948	74464	Zswim5	44.2109	0.446682	0.210538	-2.12162	0.0338694	0.324532
ENSMUSG00000047485	245683	Klhl34	564.383	-0.435191	0.205254	2.12025	0.0339847	0.324532
ENSMUSG00000042608	74178	Stk40	1379.19	0.333526	0.157286	-2.12051	0.0339634	0.324532
ENSMUSG00000079598	665180	Clec2l	113.644	0.417715	0.196945	-2.12097	0.0339243	0.324532
ENSMUSG00000027709	72039	Mccc1	734.713	0.317343	0.149632	-2.12082	0.0339368	0.324532
ENSMUSG00000036534	234595	Slc38a7	291.118	0.317272	0.14971	-2.11925	0.0340697	0.325129
ENSMUSG00000067081	208372	Asb18	193.928	0.378494	0.178641	-2.11874	0.0341122	0.325174
ENSMUSG00000055994	257632	Nod2	47.7363	0.426023	0.201081	-2.11866	0.0341192	0.325174
ENSMUSG00000001065	57247	Zfp276	506.617	0.307934	0.145474	-2.11677	0.0342795	0.326229
ENSMUSG00000020263	216190	Appl2	2582.07	0.271189	0.128106	-2.11692	0.034267	0.326229
ENSMUSG00000027284	68968	Cdan1	748.521	0.251851	0.118991	-2.11656	0.0342973	0.326229
ENSMUSG00000011306	70616	Sugp1	680.194	-0.265168	0.125348	2.11545	0.0343917	0.326503
ENSMUSG00000062867	100042069	Impdh2	476.288	-0.302768	0.143104	2.11572	0.0343689	0.326503
ENSMUSG00000022504	12265	Ciita	90.8751	0.444074	0.209922	-2.11543	0.0343936	0.326503
ENSMUSG00000036591	71435	Arhgap21	5740.41	0.243155	0.114982	-2.11472	0.0344536	0.326859
ENSMUSG00000037016	242022	Frem2	1756.15	0.426166	0.201565	-2.11428	0.0344911	0.327001
ENSMUSG00000040713	433375	Creg1	1981.52	-0.257676	0.121895	2.11393	0.0345213	0.327016
ENSMUSG00000050505	219257	Pcdh20	101.436	-0.418061	0.197783	2.11374	0.0345378	0.327016
ENSMUSG00000048814	381338	Lonrf2	207.946	0.402304	0.190464	-2.11223	0.034667	0.327812
ENSMUSG00000035828	223775	Pim3	1812.75	-0.342019	0.162017	2.11101	0.0347714	0.328585
ENSMUSG00000041577	116847	Prelp	1005.01	-0.369837	0.175223	2.11067	0.0348007	0.328648
ENSMUSG00000030470	13009	Csrp3	34468.4	-0.335345	0.158935	2.10995	0.0348629	0.329021
ENSMUSG00000042686	57339	Jph1	1028.27	-0.271931	0.128901	2.10962	0.0348915	0.329077
ENSMUSG00000001911	18032	Nfix	1930.76	0.272567	0.129223	-2.10928	0.0349204	0.329136
ENSMUSG00000025227	75146	Tmem180	26.6555	0.447062	0.212002	-2.10876	0.0349653	0.329345
ENSMUSG00000021583	80898	Erap1	1806.81	-0.274337	0.130263	2.10602	0.0352025	0.330893
ENSMUSG00000058756	21833	Thra	1884.95	0.231042	0.109699	-2.10615	0.0351914	0.330893
ENSMUSG00000054519	237775	Zfp867	268.456	-0.374837	0.177999	2.10584	0.0352186	0.330893
ENSMUSG00000028825	19746	Rhd	57.1986	0.409953	0.194677	-2.10581	0.0352207	0.330893
ENSMUSG00000054545	94284	Ugt1a6a	53.5937	-0.434322	0.206284	2.10546	0.0352515	0.330967
ENSMUSG00000005397	18073	Nid1	10199.6	-0.280164	0.133134	2.10438	0.0353451	0.331631
ENSMUSG00000022414	66513	Tab1	698.604	-0.340282	0.161764	2.10357	0.0354159	0.332081
ENSMUSG00000029683	93677	Lmod2	13853.4	-0.3421	0.162657	2.10321	0.0354479	0.332166
ENSMUSG00000020838	15567	Slc6a4	175.636	-0.430705	0.204907	2.10196	0.035557	0.332974
ENSMUSG00000047414	399558	Flrt2	1196.98	-0.327144	0.156022	2.09679	0.0360125	0.333833
ENSMUSG00000035455	60530	Fignl1	23.3548	0.450304	0.214718	-2.09719	0.0359769	0.333833
ENSMUSG00000032536	67095	Trak1	5939.4	0.265637	0.126689	-2.09676	0.0360152	0.333833
ENSMUSG00000026142	76867	Rhbdd1	637.806	-0.264992	0.126391	2.09661	0.0360279	0.333833
ENSMUSG00000032050	19684	Rdx	7051.54	-0.267832	0.127577	2.09937	0.0357841	0.333833
ENSMUSG00000022707	74185	Gbe1	2222.42	-0.230727	0.109912	2.0992	0.0357992	0.333833
ENSMUSG00000048490	268903	Nrip1	1677.48	-0.255389	0.121745	2.09773	0.035929	0.333833
ENSMUSG00000054321	72504	Taf4b	226.85	-0.30438	0.145002	2.09914	0.0358043	0.333833
ENSMUSG00000026728	22352	Vim	10991.9	-0.266461	0.126974	2.09856	0.0358561	0.333833
ENSMUSG00000019792	73681	Trmt11	235.367	-0.310089	0.147765	2.09853	0.0358585	0.333833
ENSMUSG00000026678	19737	Rgs5	2251.16	0.300655	0.143348	-2.09738	0.0359597	0.333833
ENSMUSG00000025583	74370	Rptor	1527.57	0.298792	0.142343	-2.0991	0.0358078	0.333833
ENSMUSG00000022040	13850	Ephx2	5201.17	-0.2428	0.115813	2.09648	0.0360397	0.333833
ENSMUSG00000024799	73166	Tm7sf2	75.7112	0.392971	0.187402	-2.09694	0.0359989	0.333833
ENSMUSG00000036333	77480	Kidins220	4356.21	0.22268	0.106147	-2.09784	0.035919	0.333833
ENSMUSG00000024219	224650	Anks1	2186.35	0.267037	0.127153	-2.10013	0.0357175	0.333833
ENSMUSG00000051224	245695	Tceanc	125.277	-0.380421	0.18155	2.09541	0.0361342	0.333976
ENSMUSG00000060445	320558	Sycp2	17.9275	0.45028	0.214855	-2.09574	0.0361053	0.333976
ENSMUSG00000006517	192156	Mvd	86.9023	0.424625	0.202605	-2.09582	0.0360979	0.333976
ENSMUSG00000038611	101471	Phrf1	1100.12	0.251536	0.120049	-2.09527	0.0361472	0.333976
ENSMUSG00000038013	68524	Wipf2	401.364	0.340187	0.162451	-2.09409	0.036252	0.334344
ENSMUSG00000034957	12606	Cebpa	293.294	-0.395153	0.188692	2.09417	0.0362447	0.334344
ENSMUSG00000017146	12189	Brca1	51.0513	0.442565	0.2115	-2.09251	0.0363928	0.335023
ENSMUSG00000003123	16890	Lipe	679.364	-0.451142	0.215557	2.09291	0.0363574	0.335023
ENSMUSG00000034457	245527	Eda2r	149.596	0.3813	0.182261	-2.09205	0.036434	0.335042
ENSMUSG00000061080	268890	Lsamp	107.173	-0.408864	0.195451	2.0919	0.0364472	0.335042
ENSMUSG00000045954	20324	Sdpr	8102.49	-0.283156	0.135416	2.09101	0.0365276	0.335144
ENSMUSG00000004698	100861990	Hdac9	35.9825	0.445872	0.213232	-2.09101	0.0365268	0.335144
ENSMUSG00000021054	81535	Sgpp1	956.425	-0.243627	0.116492	2.09136	0.0364956	0.335144
ENSMUSG00000021983	50769	Atp8a2	404.211	0.370544	0.177237	-2.09067	0.0365574	0.335205
ENSMUSG00000016382	102866	Pls3	1892.8	-0.296511	0.141907	2.08948	0.0366645	0.335827
ENSMUSG00000047735	209086	Samd9l	1112.67	-0.320634	0.153457	2.0894	0.0366715	0.335827
ENSMUSG00000052981	76980	Ube2ql1	215.827	0.427921	0.204879	-2.08865	0.036739	0.336234
ENSMUSG00000040640	238988	Erc2	48.193	0.420377	0.201293	-2.08838	0.0367634	0.336245
ENSMUSG00000033900	213582	Mtap9	117.478	0.382573	0.183493	-2.08494	0.0370744	0.337705
ENSMUSG00000028116	59006	Myoz2	23491.9	-0.2899	0.138979	2.08592	0.0369858	0.337705
ENSMUSG00000009013	56455	Dynll1	511.555	0.377118	0.180891	-2.08478	0.0370896	0.337705
ENSMUSG00000030934	18242	Oat	7937.88	-0.244639	0.117357	2.08456	0.0371091	0.337705
ENSMUSG00000035551	75426	Igfbpl1	127.825	0.401793	0.192725	-2.0848	0.0370875	0.337705
ENSMUSG00000017428	69077	Psmd11	767.83	0.255417	0.122478	-2.08541	0.0370318	0.337705
ENSMUSG00000028280	14408	Gabrr1	24.9939	0.44803	0.214874	-2.08508	0.0370622	0.337705
ENSMUSG00000056124	56386	B4galt6	1094.78	0.27162	0.13033	-2.08409	0.0371516	0.337712
ENSMUSG00000039911	74646	Spsb1	1370.64	0.275005	0.131958	-2.08404	0.0371565	0.337712
ENSMUSG00000032243	319480	Itga11	194.469	-0.349821	0.167896	2.08356	0.0372006	0.337902
ENSMUSG00000037405	15894	Icam1	940.153	-0.375809	0.180442	2.08271	0.0372777	0.33839
ENSMUSG00000025934	14859	Gsta3	564.916	-0.42609	0.204683	2.08171	0.0373689	0.338794
ENSMUSG00000023153	69671	Tmem52	72.6352	-0.446613	0.214526	2.08186	0.0373554	0.338794
ENSMUSG00000022772	320213	Senp5	1288	0.247344	0.118905	-2.08017	0.0375096	0.339252
ENSMUSG00000014195	56354	Dnajc7	1401.52	0.220817	0.106169	-2.07985	0.0375388	0.339252
ENSMUSG00000043252	100201	Tmem64	1563.58	-0.259381	0.12468	2.08037	0.037492	0.339252
ENSMUSG00000043157	219144	Arl11	22.3355	-0.44841	0.215571	2.0801	0.0375162	0.339252
ENSMUSG00000021707	13361	Dhfr	130.2	0.366914	0.176454	-2.07937	0.037583	0.339252
ENSMUSG00000041417	18708	Pik3r1	8768.63	-0.269831	0.129791	2.07897	0.0376204	0.339379
ENSMUSG00000002997	19088	Prkar2b	253.107	-0.400167	0.192548	2.07827	0.0376843	0.339744
ENSMUSG00000067377	56496	Tspan6	668.956	-0.406331	0.195544	2.07795	0.037714	0.339801
ENSMUSG00000033538	12363	Casp4	196.983	-0.377968	0.181968	2.07712	0.0377907	0.340069
ENSMUSG00000031379	69656	Pir	258.491	-0.317713	0.152946	2.07729	0.0377752	0.340069
ENSMUSG00000022952	12394	Runx1	85.6183	0.387106	0.186402	-2.07673	0.0378267	0.340182
ENSMUSG00000035566	219228	Pcdh17	454.249	-0.370787	0.178593	2.07615	0.0378797	0.340448
ENSMUSG00000047565	64833	Acot10	147.624	-0.354213	0.170635	2.07586	0.0379073	0.340458
ENSMUSG00000030213	54343	Atf7ip	2196.46	0.2753	0.132695	-2.07467	0.0380167	0.340715
ENSMUSG00000039959	215114	Hip1	4165.2	0.242473	0.116879	-2.07457	0.0380268	0.340715
ENSMUSG00000043909	27223	Trp53bp1	1929.34	0.245898	0.11851	-2.07491	0.0379946	0.340715
ENSMUSG00000037966	18081	Ninj1	1412.3	-0.315889	0.152382	2.07301	0.0381715	0.34159
ENSMUSG00000022286	252973	Grhl2	126.031	-0.423541	0.204409	2.07203	0.0382626	0.341984
ENSMUSG00000042772	226517	Smg7	2320.79	0.240462	0.116042	-2.0722	0.0382468	0.341984
ENSMUSG00000012428	117167	Steap4	929.736	-0.279099	0.134727	2.07159	0.0383034	0.342089
ENSMUSG00000005610	13690	Eif4g2	30778.2	0.25357	0.12244	-2.07097	0.0383613	0.342234
ENSMUSG00000042757	81907	Tmem108	549.568	-0.315923	0.152579	2.07056	0.0383998	0.342249
ENSMUSG00000078307	330941	AI593442	30.2587	0.274087	0.132387	-2.07034	0.0384202	0.342249
ENSMUSG00000046768	80837	Rhoj	1067.92	-0.358435	0.173141	2.0702	0.0384338	0.342249
ENSMUSG00000070423	259097	Olfr558	63.6041	0.440414	0.212887	-2.06877	0.038568	0.342917
ENSMUSG00000028307	230163	Aldob	35.8305	0.43302	0.209317	-2.06873	0.0385712	0.342917
ENSMUSG00000056737	12332	Capg	442.411	-0.312239	0.150939	2.06864	0.0385797	0.342917
ENSMUSG00000024474	24010	Ik	1913.52	-0.244623	0.11835	2.06694	0.0387396	0.344128
ENSMUSG00000029672	27999	Fam3c	805.711	-0.256295	0.124065	2.06582	0.0388455	0.344858
ENSMUSG00000061607	240087	Mdc1	681.764	0.302357	0.14646	-2.06444	0.0389758	0.345803
ENSMUSG00000036718	231830	Micall2	48.0113	0.424147	0.205805	-2.06091	0.0393112	0.348353
ENSMUSG00000048578	109154	Mlec	5634	0.213746	0.103728	-2.06064	0.0393373	0.348371
ENSMUSG00000054027	103466	Nt5dc3	1481.24	0.256282	0.124404	-2.06007	0.0393914	0.348382
ENSMUSG00000025138	209011	Sirt7	303.439	0.311592	0.151298	-2.05945	0.0394508	0.348382
ENSMUSG00000028836	230810	Slc30a2	32.6821	0.434228	0.21085	-2.05942	0.0394542	0.348382
ENSMUSG00000028278	52187	Rragd	4265.97	0.266578	0.129402	-2.06008	0.0393912	0.348382
ENSMUSG00000056679	70771	Gpr173	21.86	0.444531	0.216049	-2.05755	0.0396338	0.349293
ENSMUSG00000042320	73422	Prox2	52.9215	0.412388	0.200541	-2.05638	0.0397458	0.349854
ENSMUSG00000063889	12916	Crem	345.639	0.342146	0.166446	-2.0556	0.0398212	0.350093
ENSMUSG00000050148	54609	Ubqln2	682.815	0.340836	0.165873	-2.05481	0.0398977	0.350105
ENSMUSG00000038545	66515	Cul7	1088.96	0.291647	0.141923	-2.05497	0.039882	0.350105
ENSMUSG00000027007	70599	Ssfa2	1936.74	-0.222908	0.108458	2.05525	0.0398547	0.350105
ENSMUSG00000055723	66922	Rras2	1478.55	-0.342863	0.166877	2.05459	0.0399189	0.350105
ENSMUSG00000015597	57908	Zfp318	1263.32	0.26827	0.130606	-2.05403	0.0399724	0.350362
ENSMUSG00000053930	380702	Shisa6	16.3822	0.433136	0.210912	-2.05364	0.0400107	0.350486
ENSMUSG00000024065	57440	Ehd3	215.934	-0.337583	0.164409	2.05332	0.0400417	0.350546
ENSMUSG00000021285	21981	Ppp1r13b	801.128	0.269904	0.131472	-2.05293	0.0400791	0.350662
ENSMUSG00000002835	27221	Chaf1a	63.1163	0.388482	0.189308	-2.05212	0.0401579	0.350767
ENSMUSG00000055884	104806	Fancm	364.839	0.316723	0.154363	-2.05181	0.0401878	0.350767
ENSMUSG00000061143	433586	Maml3	304.949	0.287948	0.140323	-2.05203	0.0401664	0.350767
ENSMUSG00000014303	83396	Glis2	797.752	-0.25454	0.124012	2.05254	0.0401173	0.350767
ENSMUSG00000039307	238023	Hexdc	186.811	0.314232	0.153235	-2.05066	0.0403002	0.351509
ENSMUSG00000027996	20319	Sfrp2	81.0028	-0.37943	0.185048	2.05044	0.0403212	0.351509
ENSMUSG00000035413	103743	Tmem98	550.016	-0.308639	0.150587	2.04957	0.0404061	0.351616
ENSMUSG00000046027	170460	Stard5	396.558	-0.276466	0.134876	2.04977	0.0403869	0.351616
ENSMUSG00000043068	69627	Fam89a	17.4211	0.440553	0.214909	-2.04995	0.0403694	0.351616
ENSMUSG00000029223	22223	Uchl1	133.716	0.41888	0.204442	-2.04889	0.0404725	0.351771
ENSMUSG00000047557	17035	Lxn	101.978	0.415263	0.202922	-2.04642	0.0407152	0.351984
ENSMUSG00000026235	13838	Epha4	11908.1	0.357292	0.174581	-2.04657	0.0407006	0.351984
ENSMUSG00000036446	17022	Lum	5638.25	-0.395784	0.193332	2.04717	0.0406415	0.351984
ENSMUSG00000029455	11669	Aldh2	5486.7	-0.356301	0.174072	2.04686	0.0406715	0.351984
ENSMUSG00000023755	69159	Rhebl1	49.3146	-0.415616	0.203028	2.04708	0.0406502	0.351984
ENSMUSG00000024076	74199	Vit	148.851	-0.407664	0.199055	2.048	0.0405604	0.351984
ENSMUSG00000020902	18208	Ntn1	3543.31	-0.26177	0.12791	2.04652	0.0407049	0.351984
ENSMUSG00000030766	70497	Arhgap17	460.941	0.30844	0.150577	-2.04839	0.0405219	0.351984
ENSMUSG00000052861	330355	Dnahc6	36.5715	-0.442346	0.216042	2.0475	0.0406094	0.351984
ENSMUSG00000042308	233904	Setd1a	594.467	0.330989	0.161781	-2.04591	0.0407656	0.35221
ENSMUSG00000002289	57875	Angptl4	181.225	-0.292053	0.142767	2.04566	0.0407901	0.352212
ENSMUSG00000021918	23955	Nek4	161.772	0.318711	0.155852	-2.04496	0.0408585	0.352406
ENSMUSG00000051339	243219	2900026A02Rik	1617.13	0.291118	0.142383	-2.04461	0.0408934	0.352475
ENSMUSG00000029104	15194	Htt	2362.03	0.211618	0.103542	-2.04379	0.0409746	0.3529
ENSMUSG00000051435	329977	Fhad1	64.4606	-0.410233	0.200739	2.04362	0.0409914	0.3529
ENSMUSG00000033237	77044	Arid2	2008.43	0.212515	0.10404	-2.04263	0.041089	0.353321
ENSMUSG00000036155	107895	Mgat5	657.83	0.250898	0.122846	-2.04237	0.0411144	0.353331
ENSMUSG00000055204	81702	Ankrd17	5440.52	0.213873	0.104733	-2.04209	0.0411429	0.353367
ENSMUSG00000040687	228355	Madd	380.032	0.348468	0.170713	-2.04125	0.041226	0.353871
ENSMUSG00000049804	100503043	Armcx4	893.714	-0.265918	0.130378	2.03959	0.0413915	0.354872
ENSMUSG00000030498	14453	Gas2	61.6274	0.393166	0.192763	-2.03963	0.0413872	0.354872
ENSMUSG00000025730	224624	Rab40c	267.215	0.342899	0.168169	-2.03901	0.0414493	0.355157
ENSMUSG00000074577	69553	Fam65c	53.9866	0.411513	0.201855	-2.03865	0.0414845	0.35525
ENSMUSG00000078970	103784	Wdr92	338.9	0.320491	0.157244	-2.03818	0.0415322	0.355448
ENSMUSG00000026315	20725	Serpinb8	225.549	-0.319121	0.156635	2.03735	0.0416148	0.35594
ENSMUSG00000050350	110168	Gpr18	32.9204	0.436054	0.214071	-2.03696	0.0416538	0.35594
ENSMUSG00000067455	319157	Hist1h4j	23.2135	0.439433	0.215965	-2.03474	0.0418773	0.356719
ENSMUSG00000064288	319157	Hist1h4k	23.2135	0.439433	0.215965	-2.03474	0.0418773	0.356719
ENSMUSG00000069306	319157	Hist1h4m	23.2135	0.439433	0.215965	-2.03474	0.0418773	0.356719
ENSMUSG00000069305	319157	Hist1h4n	23.2135	0.439433	0.215965	-2.03474	0.0418773	0.356719
ENSMUSG00000060639	319157	Hist1h4i	23.2135	0.439433	0.215965	-2.03474	0.0418773	0.356719
ENSMUSG00000068851	319157	Hist4h4	23.2135	0.439433	0.215965	-2.03474	0.0418773	0.356719
ENSMUSG00000034487	68304	Kdelc2	991.819	-0.266179	0.1308	2.035	0.0418509	0.356719
ENSMUSG00000050390	97130	C77080	310.227	0.334893	0.164549	-2.03521	0.0418293	0.356719
ENSMUSG00000091405	319157	Hist2h4	23.2135	0.439433	0.215965	-2.03474	0.0418773	0.356719
ENSMUSG00000060981	319157	Hist1h4h	23.2135	0.439433	0.215965	-2.03474	0.0418773	0.356719
ENSMUSG00000069274	319157	Hist1h4f	23.2135	0.439433	0.215965	-2.03474	0.0418773	0.356719
ENSMUSG00000061482	319157	Hist1h4d	23.2135	0.439433	0.215965	-2.03474	0.0418773	0.356719
ENSMUSG00000060678	319157	Hist1h4c	23.2135	0.439433	0.215965	-2.03474	0.0418773	0.356719
ENSMUSG00000069266	319157	Hist1h4b	23.2135	0.439433	0.215965	-2.03474	0.0418773	0.356719
ENSMUSG00000060093	319157	Hist1h4a	23.2135	0.439433	0.215965	-2.03474	0.0418773	0.356719
ENSMUSG00000048387	23967	Osr1	466.301	-0.314141	0.15437	2.03499	0.0418521	0.356719
ENSMUSG00000006360	12925	Crip1	2659.42	-0.338345	0.166312	2.0344	0.0419112	0.356798
ENSMUSG00000013846	20442	St3gal1	1214.81	0.33639	0.165507	-2.03248	0.0421047	0.357189
ENSMUSG00000030433	381836	Sbk2	4412.1	0.340245	0.167342	-2.03323	0.0420294	0.357189
ENSMUSG00000068877	20342	Selenbp2	173.661	-0.341155	0.167839	2.03263	0.04209	0.357189
ENSMUSG00000024353	69816	2010001M09Rik	45.4688	0.429547	0.211314	-2.03274	0.0420784	0.357189
ENSMUSG00000030605	17304	Mfge8	3456.95	-0.264985	0.130434	2.03157	0.0421972	0.357555
ENSMUSG00000028970	18669	Abcb1b	571.445	-0.394675	0.194343	2.03082	0.0422733	0.357574
ENSMUSG00000031402	17524	Mpp1	612.903	-0.298509	0.146988	2.03084	0.0422711	0.357574
ENSMUSG00000001150	54387	Mcm3ap	1521.08	0.242569	0.119543	-2.02914	0.042444	0.358613
ENSMUSG00000058441	406218	Panx2	220.837	0.407179	0.200718	-2.02861	0.0424978	0.358613
ENSMUSG00000055546	276891	Timd4	99.6476	-0.421124	0.207616	2.02838	0.0425215	0.358613
ENSMUSG00000017376	18099	Nlk	546.941	0.248851	0.122742	-2.02743	0.0426185	0.358613
ENSMUSG00000040003	50791	Magi2	268.884	0.375385	0.185122	-2.02777	0.042584	0.358613
ENSMUSG00000043456	243937	Zfp536	312.378	0.370426	0.182698	-2.02754	0.0426076	0.358613
ENSMUSG00000024785	59028	Rcl1	202.782	-0.357957	0.176448	2.02868	0.0424905	0.358613
ENSMUSG00000075289	107239	Carns1	902.897	0.307416	0.151625	-2.02748	0.042613	0.358613
ENSMUSG00000015812	14714	Gnrh1	18.0679	0.438059	0.215993	-2.02811	0.0425487	0.358613
ENSMUSG00000071285	170763	Zfp87	219.186	-0.327398	0.161547	2.02664	0.0426993	0.35867
ENSMUSG00000059495	69632	Arhgef12	19265.6	-0.206545	0.101913	2.02668	0.0426954	0.35867
ENSMUSG00000031950	93739	Gabarapl2	207.98	-0.332906	0.164234	2.02702	0.0426607	0.35867
ENSMUSG00000024687	76303	Osbp	4025	0.258916	0.127819	-2.02565	0.0428008	0.359107
ENSMUSG00000091183	100041979	Gm3604	44.2213	-0.433922	0.214278	2.02505	0.0428627	0.359244
ENSMUSG00000027860	229658	Vangl1	400.206	0.29124	0.143821	-2.02501	0.0428667	0.359244
ENSMUSG00000049709	244202	Nlrp10	914.072	0.245315	0.121183	-2.02433	0.0429359	0.359616
ENSMUSG00000034109	73124	Golim4	2216.24	-0.217484	0.107469	2.02369	0.0430024	0.359741
ENSMUSG00000027035	241447	Lass6	1144.27	0.245515	0.121368	-2.02289	0.0430848	0.359825
ENSMUSG00000015568	16956	Lpl	31365.7	0.363632	0.179819	-2.02221	0.0431548	0.359995
ENSMUSG00000046179	108961	E2f8	23.6967	0.436855	0.216008	-2.0224	0.0431347	0.359995
ENSMUSG00000055200	170742	Sertad3	132.12	-0.328407	0.162456	2.02151	0.0432268	0.360182
ENSMUSG00000005973	19672	Rcn1	1539.51	-0.2348	0.116148	2.02157	0.0432213	0.360182
ENSMUSG00000048332	108927	Lhfp	2267.19	-0.271039	0.134126	2.02078	0.0433025	0.360606
ENSMUSG00000028656	12331	Cap1	1810.8	-0.262073	0.129745	2.0199	0.0433935	0.360949
ENSMUSG00000001855	227720	Nup214	1217.66	0.235408	0.116568	-2.01949	0.0434367	0.361102
ENSMUSG00000037661	71862	Gpr160	67.6437	-0.40664	0.201432	2.01874	0.0435137	0.361328
ENSMUSG00000074345	244882	Tnfaip8l3	39.6137	-0.434898	0.215506	2.01804	0.0435876	0.361735
ENSMUSG00000024659	16952	Anxa1	1634.98	-0.32108	0.159134	2.01767	0.0436261	0.361847
ENSMUSG00000046688	211550	Tifa	163.151	-0.339193	0.168143	2.01729	0.0436656	0.361968
ENSMUSG00000024524	14680	Gnal	173.159	-0.340711	0.168929	2.01689	0.0437066	0.362101
ENSMUSG00000061175	329679	Fnip2	769.009	0.285797	0.141857	-2.01468	0.0439383	0.363813
ENSMUSG00000027397	20515	Slc20a1	995.382	0.335354	0.166486	-2.0143	0.0439776	0.363931
ENSMUSG00000020706	56095	Ftsj3	1040.45	-0.254345	0.126285	2.01406	0.0440035	0.363938
ENSMUSG00000030739	71960	Myh14	3365.03	0.396833	0.197229	-2.01204	0.0442157	0.365069
ENSMUSG00000059479	232984	B3gnt8	130.074	-0.40578	0.201656	2.01224	0.0441949	0.365069
ENSMUSG00000035245	101351	A130022J15Rik	774.119	-0.261178	0.129787	2.01236	0.0441817	0.365069
ENSMUSG00000033039	27008	Micall1	1945.14	0.251668	0.125126	-2.01131	0.0442926	0.365247
ENSMUSG00000051504	233274	Siglech	47.8075	-0.434504	0.216051	2.01112	0.0443128	0.365247
ENSMUSG00000039206	231871	Daglb	730.282	-0.27687	0.137695	2.01075	0.0443524	0.365366
ENSMUSG00000031910	15118	Has3	218.915	0.341349	0.169874	-2.00943	0.0444915	0.366062
ENSMUSG00000029402	76167	Snrnp35	138.31	-0.354602	0.176487	2.00923	0.0445132	0.366062
ENSMUSG00000033623	69587	Pcgf3	1115.5	0.24174	0.120329	-2.00899	0.0445378	0.366062
ENSMUSG00000041037	210146	Irgq	1136.7	0.311573	0.155088	-2.00901	0.0445359	0.366062
ENSMUSG00000021573	72948	Tppp	2710.19	0.239527	0.119297	-2.00781	0.0446634	0.366679
ENSMUSG00000038543	229600	BC028528	36.383	0.429655	0.213983	-2.00789	0.0446548	0.366679
ENSMUSG00000001847	19353	Rac1	4239.26	-0.22382	0.111552	2.00643	0.0448107	0.36768
ENSMUSG00000037254	16425	Itih2	81.226	-0.430973	0.214865	2.00579	0.0448789	0.367877
ENSMUSG00000070803	56222	Cited4	624.128	0.390012	0.194449	-2.00573	0.0448854	0.367877
ENSMUSG00000057229	66349	Atp5sl	1232.64	-0.231755	0.115571	2.00531	0.0449302	0.368037
ENSMUSG00000028121	29815	Bcar3	191.748	-0.329368	0.16434	2.00418	0.0450506	0.368815
ENSMUSG00000057897	12323	Camk2b	448.33	0.376185	0.187743	-2.00373	0.0450994	0.369007
ENSMUSG00000052026	240332	Slc6a7	19.6434	0.42846	0.214014	-2.00201	0.0452832	0.370302
ENSMUSG00000034158	320184	Lrrc58	6629.33	-0.264391	0.1321	2.00145	0.0453438	0.370365
ENSMUSG00000025261	59026	Huwe1	16572.5	0.225131	0.11249	-2.00134	0.0453556	0.370365
ENSMUSG00000026582	20339	Sele	35.2086	0.42808	0.213918	-2.00114	0.0453769	0.370365
ENSMUSG00000002010	15929	Idh3g	9037.59	-0.203028	0.101464	2.00099	0.045393	0.370365
ENSMUSG00000052139	107976	Bre	678.187	-0.249712	0.124837	2.00031	0.045467	0.370761
ENSMUSG00000025574	21877	Tk1	79.5025	0.377623	0.188855	-1.99954	0.0455497	0.371227
ENSMUSG00000074818	100503041	Pdzd7	81.1626	0.382772	0.191482	-1.999	0.0456089	0.3715
ENSMUSG00000018171	75909	Vmp1	1907.49	-0.262617	0.131431	1.99814	0.0457012	0.37172
ENSMUSG00000032558	74025	Nphp3	796.792	0.264965	0.132599	-1.99824	0.0456902	0.37172
ENSMUSG00000039982	207521	Dtx4	631.903	-0.326045	0.163183	1.99804	0.0457127	0.37172
ENSMUSG00000038665	320127	Dgki	18.7435	0.42309	0.211791	-1.99768	0.0457519	0.37183
ENSMUSG00000016984	68145	Etaa1	160.669	-0.351927	0.176224	1.99704	0.0458203	0.372178
ENSMUSG00000035686	21835	Thrsp	331.589	-0.406593	0.203699	1.99605	0.0459287	0.372451
ENSMUSG00000030089	71699	Slc41a3	1133	0.352595	0.176648	-1.99603	0.0459309	0.372451
ENSMUSG00000014592	100072	Camta1	2563.49	0.31863	0.159627	-1.99609	0.0459238	0.372451
ENSMUSG00000003849	18104	Nqo1	474.124	-0.306841	0.153792	1.99517	0.046024	0.372997
ENSMUSG00000006941	68969	Eif1b	950.93	0.246365	0.123511	-1.99468	0.046078	0.373019
ENSMUSG00000018372	320162	Ccdc45	331.444	0.294054	0.147417	-1.9947	0.0460752	0.373019
ENSMUSG00000036450	319594	Hif1an	3801.82	0.257032	0.128918	-1.99377	0.0461771	0.373404
ENSMUSG00000024810	77125	Il33	886.988	-0.381096	0.191175	1.99344	0.0462138	0.373493
ENSMUSG00000024169	106633	Ift140	514.789	0.26401	0.132465	-1.99306	0.0462553	0.37362
ENSMUSG00000032565	75686	Nudt16	159.367	-0.3445	0.172973	1.99165	0.0464098	0.373929
ENSMUSG00000073968	101700	Trim68	524.083	0.308836	0.155074	-1.99153	0.0464224	0.373929
ENSMUSG00000015488	381356	5930434B04Rik	694.349	0.283459	0.142306	-1.9919	0.046382	0.373929
ENSMUSG00000024507	15488	Hsd17b4	2634.14	-0.233237	0.1171	1.99177	0.0463963	0.373929
ENSMUSG00000020572	59027	Nampt	4924.71	-0.290925	0.146053	1.99192	0.0463799	0.373929
ENSMUSG00000045140	70325	Pigw	100.818	0.362662	0.182209	-1.99036	0.0465511	0.374551
ENSMUSG00000049090	225791	Zadh2	1744.84	0.339726	0.170665	-1.99059	0.0465256	0.374551
ENSMUSG00000023826	50873	Park2	225.899	0.347543	0.174758	-1.98871	0.0467329	0.375597
ENSMUSG00000033016	18018	Nfatc1	860.282	0.268842	0.13518	-1.98877	0.0467263	0.375597
ENSMUSG00000063273	74838	Naa15	2671.41	0.270643	0.136136	-1.98803	0.0468083	0.375995
ENSMUSG00000022868	11625	Ahsg	1838.82	-0.416012	0.209476	1.98596	0.0470375	0.377627
ENSMUSG00000012705	57264	Retn	24.7749	-0.379339	0.191036	1.98569	0.0470674	0.377658
ENSMUSG00000050860	237928	Phospho1	185.536	0.33441	0.168496	-1.98468	0.0471799	0.378142
ENSMUSG00000025026	27360	Add3	4301.69	-0.233922	0.117855	1.98483	0.0471638	0.378142
ENSMUSG00000032125	74144	Robo4	672.387	0.273692	0.137979	-1.98357	0.0473041	0.378719
ENSMUSG00000050587	241568	Lrrc4c	73.4704	0.400317	0.201814	-1.98359	0.047301	0.378719
ENSMUSG00000024795	240641	Kif20b	58.4911	0.416674	0.210451	-1.97991	0.0477137	0.378833
ENSMUSG00000012443	16551	Kif11	73.7511	0.416928	0.210857	-1.9773	0.0480077	0.378833
ENSMUSG00000062825	11465	Actg1	164.798	0.391484	0.197942	-1.97777	0.0479543	0.378833
ENSMUSG00000024978	14732	Gpam	3220.63	-0.317538	0.160309	1.98079	0.0476148	0.378833
ENSMUSG00000005886	17978	Ncoa2	2781.6	0.258674	0.130508	-1.98205	0.0474732	0.378833
ENSMUSG00000001053	212706	N4bp3	214.201	0.369614	0.186489	-1.98196	0.0474833	0.378833
ENSMUSG00000033107	67664	Rnf125	104.262	-0.404217	0.203847	1.98294	0.0473736	0.378833
ENSMUSG00000035237	16816	Lcat	48.6117	0.398989	0.201465	-1.98044	0.0476538	0.378833
ENSMUSG00000025993	53945	Slc40a1	855.13	-0.362048	0.183061	1.97775	0.0479573	0.378833
ENSMUSG00000003847	54446	Nfat5	2321.06	0.256049	0.129309	-1.98013	0.0476886	0.378833
ENSMUSG00000032911	121021	Cspg4	1544.67	0.34086	0.171919	-1.98268	0.0474037	0.378833
ENSMUSG00000019978	13822	Epb4.1l2	3213.98	-0.265888	0.134293	1.97991	0.047714	0.378833
ENSMUSG00000032262	83603	Elovl4	16.2843	-0.419589	0.211867	1.98044	0.0476541	0.378833
ENSMUSG00000032607	434437	Amt	70.8024	0.37037	0.187148	-1.97902	0.0478136	0.378833
ENSMUSG00000060568	226610	Fam78b	202.325	0.34293	0.172935	-1.983	0.0473676	0.378833
ENSMUSG00000059049	329872	Frem1	62.177	0.389661	0.197048	-1.97749	0.0479863	0.378833
ENSMUSG00000054720	100604	Lrrc8c	459.3	0.30607	0.154809	-1.97708	0.0480322	0.378833
ENSMUSG00000064367	17721	mt-Nd5	34023.8	0.426529	0.215628	-1.97808	0.0479199	0.378833
ENSMUSG00000019278	13479	Dpep1	3623.38	-0.427974	0.216045	1.98095	0.0475968	0.378833
ENSMUSG00000028088	14263	Fmo5	567.635	0.350874	0.177243	-1.97962	0.0477463	0.378833
ENSMUSG00000021134	20384	Srsf5	1731.12	-0.307311	0.155438	1.97707	0.0480343	0.378833
ENSMUSG00000034021	100710	Pds5b	1951.01	0.271608	0.137389	-1.97693	0.048049	0.378833
ENSMUSG00000034648	16979	Lrrn1	43.9126	0.427413	0.216068	-1.97814	0.0479131	0.378833
ENSMUSG00000041734	170643	Kirrel	792.347	-0.26577	0.134307	1.97882	0.047836	0.378833
ENSMUSG00000027630	81004	Tbl1xr1	3156.39	-0.225456	0.113975	1.97811	0.0479157	0.378833
ENSMUSG00000026883	69601	Dab2ip	1967.94	-0.285592	0.144508	1.97631	0.04812	0.379187
ENSMUSG00000060487	320825	Samd5	143.623	-0.35681	0.180588	1.97582	0.0481753	0.37921
ENSMUSG00000059173	18573	Pde1a	667.851	-0.34241	0.173294	1.97589	0.0481673	0.37921
ENSMUSG00000032988	57274	Slc16a8	50.0769	0.417219	0.211221	-1.97527	0.048237	0.37949
ENSMUSG00000074802	237436	Gas2l3	255.354	-0.387447	0.196173	1.97503	0.0482652	0.379507
ENSMUSG00000020430	64934	Pes1	499.736	-0.25892	0.131221	1.97315	0.0484779	0.380767
ENSMUSG00000021972	219150	Hmbox1	550.938	0.242417	0.122845	-1.97336	0.048455	0.380767
ENSMUSG00000053137	19094	Mapk11	92.2052	0.360453	0.182769	-1.97218	0.0485893	0.380946
ENSMUSG00000042520	74383	Ubap2l	2337.41	0.214292	0.108656	-1.9722	0.0485866	0.380946
ENSMUSG00000027322	20612	Siglec1	271.777	-0.361617	0.183373	1.97203	0.0486057	0.380946
ENSMUSG00000059897	234358	Zfp930	505.213	-0.321732	0.163314	1.97002	0.0488365	0.381749
ENSMUSG00000004814	56221	Ccl24	117.727	-0.40639	0.206258	1.9703	0.0488041	0.381749
ENSMUSG00000071540	100504518	3425401B19Rik	1605.14	0.287758	0.146075	-1.96993	0.0488466	0.381749
ENSMUSG00000021754	26401	Map3k1	1346.51	-0.216001	0.109604	1.97075	0.048753	0.381749
ENSMUSG00000034850	69470	Tmem127	1598.75	0.213199	0.10822	-1.97006	0.048832	0.381749
ENSMUSG00000026034	12747	Clk1	2188.54	0.287939	0.1462	-1.96948	0.0488976	0.38179
ENSMUSG00000064370	17711	mt-Cytb	105738	0.318726	0.16189	-1.96878	0.0489783	0.382215
ENSMUSG00000032878	216613	Ccdc85a	271.11	0.375902	0.191003	-1.96804	0.0490631	0.382465
ENSMUSG00000002608	52132	Ccdc97	734.098	0.334966	0.170184	-1.96825	0.0490388	0.382465
ENSMUSG00000026274	269224	Pask	23.2734	0.423988	0.215465	-1.96778	0.0490937	0.382499
ENSMUSG00000031189	14266	Aff2	421.304	0.311255	0.158198	-1.9675	0.0491255	0.382541
ENSMUSG00000006344	23887	Ggt5	411.181	-0.332877	0.16926	1.96666	0.0492226	0.383092
ENSMUSG00000035150	100039419	Eif2s3x	581.743	-0.360585	0.183431	1.96578	0.0493242	0.383472
ENSMUSG00000032946	19395	Rasgrp2	266.843	0.335597	0.17074	-1.96555	0.0493511	0.383475
ENSMUSG00000038146	18131	Notch3	1018.22	0.394899	0.200959	-1.96507	0.0494062	0.383698
ENSMUSG00000000555	16402	Itga5	2410.47	0.258451	0.131558	-1.96454	0.0494676	0.383764
ENSMUSG00000029627	67235	Zkscan14	167.262	-0.322251	0.164033	1.96455	0.0494662	0.383764
ENSMUSG00000028106	75137	Rprd2	1687.71	0.253273	0.12896	-1.96396	0.0495343	0.384076
ENSMUSG00000042121	231637	Ssh1	438.032	0.298528	0.15209	-1.96284	0.049665	0.384443
ENSMUSG00000018427	77864	Ypel2	1218.02	0.331592	0.168952	-1.96264	0.0496876	0.384443
ENSMUSG00000029657	15505	Hsph1	2030.82	0.414606	0.21119	-1.96319	0.0496235	0.384443
ENSMUSG00000040498	70080	2210010C17Rik	624.92	0.313171	0.159546	-1.96289	0.0496592	0.384443
ENSMUSG00000056073	14806	Grik2	48.5676	0.395799	0.201701	-1.96231	0.0497262	0.384537
ENSMUSG00000035681	268345	Kcnc2	217.262	-0.33214	0.169296	1.96189	0.0497757	0.384714
ENSMUSG00000000861	14025	Bcl11a	42.4191	0.412639	0.21055	-1.95982	0.0500172	0.385511
ENSMUSG00000018160	19014	Med1	2553.48	0.221234	0.112858	-1.96029	0.0499613	0.385511
ENSMUSG00000063564	237759	Col23a1	546.022	-0.334181	0.170484	1.96019	0.0499739	0.385511
ENSMUSG00000020680	70439	Taf15	316.925	0.305521	0.155917	-1.95951	0.0500534	0.385511
ENSMUSG00000036923	216021	Stox1	29.1289	-0.417981	0.21332	1.95941	0.0500646	0.385511
ENSMUSG00000038803	67695	Ost4	199.942	0.326402	0.16656	-1.95966	0.0500353	0.385511
ENSMUSG00000029851	232748	Fam115c	181.271	-0.327157	0.16686	1.96067	0.0499178	0.385511
ENSMUSG00000071653	66276	1810009A15Rik	304.19	-0.309343	0.157966	1.95829	0.050196	0.386318
ENSMUSG00000025226	68431	Fbxl15	44.7769	-0.400339	0.204465	1.95798	0.0502324	0.386393
ENSMUSG00000028152	56224	Tspan5	523.582	-0.29456	0.150512	1.95705	0.0503417	0.386414
ENSMUSG00000001525	22154	Tubb5	1354.26	-0.299923	0.153224	1.95742	0.0502983	0.386414
ENSMUSG00000029675	13717	Eln	3274.99	0.363551	0.185753	-1.95718	0.0503268	0.386414
ENSMUSG00000025745	97212	Hadha	17875	-0.25627	0.130939	1.95717	0.050328	0.386414
ENSMUSG00000071078	75692	Nr2c2ap	39.8489	0.41965	0.214579	-1.95569	0.0505018	0.387438
ENSMUSG00000028821	68592	Syf2	697.463	-0.265169	0.135639	1.95496	0.0505874	0.38789
ENSMUSG00000050106	217356	Tmc8	87.2834	0.364648	0.186575	-1.95443	0.0506501	0.388166
ENSMUSG00000024529	16948	Lox	331.906	-0.271151	0.138787	1.95372	0.0507338	0.388602
ENSMUSG00000042895	223513	Abra	2255.04	-0.325905	0.166948	1.95213	0.0509224	0.388892
ENSMUSG00000061536	215474	Sec22c	191.121	0.386068	0.197923	-1.9506	0.0511052	0.388892
ENSMUSG00000053617	14218	Sh3pxd2a	3730.06	0.279244	0.143167	-1.95048	0.051119	0.388892
ENSMUSG00000054003	74691	Tdrd9	46.3312	0.393501	0.201724	-1.95069	0.0510938	0.388892
ENSMUSG00000043366	170639	Olfr78	20.8835	0.412051	0.211153	-1.95143	0.0510058	0.388892
ENSMUSG00000039835	215819	Nhsl1	1002.31	0.315395	0.161531	-1.95253	0.0508749	0.388892
ENSMUSG00000054000	69136	Tusc1	44.0349	-0.401812	0.206007	1.95047	0.0511199	0.388892
ENSMUSG00000001419	17261	Mef2d	1384.38	0.316949	0.162292	-1.95296	0.0508243	0.388892
ENSMUSG00000028041	11490	Adam15	2252.95	-0.298567	0.153046	1.95083	0.0510775	0.388892
ENSMUSG00000034312	232227	Iqsec1	3443.98	0.342768	0.1756	-1.95198	0.0509402	0.388892
ENSMUSG00000047409	69274	Ctdspl	746.989	-0.269473	0.138131	1.95086	0.0510741	0.388892
ENSMUSG00000001864	108897	Aif1l	570.555	-0.363567	0.186444	1.95001	0.0511753	0.389109
ENSMUSG00000031007	70495	Atp6ap2	1026.3	-0.300453	0.154098	1.94975	0.0512055	0.389135
ENSMUSG00000031253	68792	Srpx2	238.537	-0.322907	0.165702	1.94872	0.0513287	0.389867
ENSMUSG00000054381	269997	Zfp747	104.199	-0.349593	0.179442	1.94822	0.0513891	0.390122
ENSMUSG00000050440	84506	Hamp	88.2389	-0.381126	0.195677	1.94773	0.0514479	0.390364
ENSMUSG00000038252	68298	Ncapd2	642.006	0.257115	0.132037	-1.9473	0.0514987	0.390545
ENSMUSG00000024327	14977	Slc39a7	3017.79	-0.254203	0.130579	1.94673	0.0515668	0.390857
ENSMUSG00000002524	67959	Puf60	2170.64	-0.231516	0.118957	1.94622	0.0516278	0.391115
ENSMUSG00000031880	56437	Rrad	5849.4	-0.379249	0.194965	1.94522	0.0517488	0.391221
ENSMUSG00000009210	75573	2310007L24Rik	43.873	0.39972	0.205422	-1.94585	0.0516729	0.391221
ENSMUSG00000032263	12040	Bckdhb	1146.07	-0.212528	0.109237	1.94558	0.0517055	0.391221
ENSMUSG00000034127	216350	Tspan8	60.9555	-0.412766	0.212196	1.94521	0.0517495	0.391221
ENSMUSG00000059742	170738	Kcnh7	455.024	0.318166	0.163666	-1.94399	0.0518962	0.391922
ENSMUSG00000026615	107508	Eprs	5523.32	-0.201576	0.103688	1.94407	0.0518875	0.391922
ENSMUSG00000031262	102920	Cenpi	16.3633	0.413238	0.212688	-1.94293	0.0520247	0.392169
ENSMUSG00000031529	21951	Tnks	2562.07	0.192651	0.0991603	-1.94283	0.0520371	0.392169
ENSMUSG00000021665	15212	Hexb	1111.42	-0.243296	0.125188	1.94345	0.0519624	0.392169
ENSMUSG00000001773	53320	Folh1	41.8079	-0.418813	0.215553	1.94297	0.0520197	0.392169
ENSMUSG00000039116	215798	Gpr126	662.44	-0.276115	0.142147	1.94246	0.0520812	0.392298
ENSMUSG00000036371	66870	Serbp1	7351.05	-0.203525	0.104812	1.94181	0.0521605	0.392692
ENSMUSG00000038349	227120	Plcl1	875.988	0.268364	0.13825	-1.94116	0.0522393	0.392877
ENSMUSG00000067148	20016	Polr1c	353.608	-0.291653	0.15023	1.94137	0.0522128	0.392877
ENSMUSG00000031343	14396	Gabra3	21.0788	-0.416315	0.214558	1.94034	0.0523381	0.393417
ENSMUSG00000026308	70788	Klhl30	1042.52	0.276509	0.142549	-1.93974	0.0524109	0.39376
ENSMUSG00000029861	76156	Fam131b	121.745	-0.326575	0.168431	1.93892	0.052511	0.394308
ENSMUSG00000054074	72668	2810030E01Rik	169.221	-0.368849	0.190261	1.93865	0.0525437	0.394349
ENSMUSG00000022332	13992	Khdrbs3	965.685	-0.223073	0.115102	1.93806	0.0526164	0.394504
ENSMUSG00000020620	27404	Abca8b	1672.09	-0.27184	0.140266	1.93804	0.0526187	0.394504
ENSMUSG00000037447	214855	Arid5a	480.449	0.379656	0.195938	-1.93763	0.0526685	0.394512
ENSMUSG00000037225	14173	Fgf2	82.1473	-0.362766	0.187306	1.93676	0.052775	0.395064
ENSMUSG00000029126	18196	Nsg1	163.513	-0.338477	0.174787	1.93651	0.0528056	0.395089
ENSMUSG00000043323	381668	Fbrsl1	546.109	0.295805	0.152782	-1.93613	0.0528524	0.395235
ENSMUSG00000055865	329731	Fam19a3	119.493	0.372062	0.192337	-1.93443	0.0530599	0.396379
ENSMUSG00000039063	67856	Echdc3	641.568	0.271362	0.140301	-1.93414	0.0530957	0.396442
ENSMUSG00000037419	71946	Endod1	491.243	-0.237763	0.122973	1.93345	0.0531807	0.396465
ENSMUSG00000054580	18779	Pla2r1	589.69	0.305178	0.157805	-1.93389	0.0531267	0.396465
ENSMUSG00000030000	11519	Add2	112.98	-0.397928	0.205811	1.93346	0.0531795	0.396465
ENSMUSG00000038521	50908	C1s	1329.98	-0.372281	0.192707	1.93184	0.0533787	0.397574
ENSMUSG00000020592	20969	Sdc1	363.349	-0.321344	0.166345	1.9318	0.0533842	0.397574
ENSMUSG00000020848	13447	Doc2b	62.7673	-0.401541	0.207892	1.93149	0.0534229	0.397658
ENSMUSG00000058420	110058	Syt17	41.5992	-0.408168	0.21138	1.93097	0.053487	0.397753
ENSMUSG00000021223	170721	Papln	397.963	0.349374	0.180934	-1.93094	0.0534904	0.397753
ENSMUSG00000064345	17717	mt-Nd2	24252.6	0.360834	0.186964	-1.92997	0.0536105	0.398442
ENSMUSG00000062949	320940	Atp11c	788.196	-0.272853	0.141401	1.92963	0.0536522	0.398536
ENSMUSG00000060314	407812	Zfp941	20.4235	-0.406547	0.210709	1.92943	0.0536781	0.398536
ENSMUSG00000070808	243842	Gltscr1	224.263	0.355793	0.184428	-1.92917	0.0537097	0.398567
ENSMUSG00000032011	21838	Thy1	399.203	-0.318654	0.165225	1.92861	0.0537792	0.398878
ENSMUSG00000005124	22402	Wisp1	744.984	0.370673	0.192276	-1.92782	0.053878	0.39925
ENSMUSG00000026854	74270	Usp20	1162.25	0.316978	0.164428	-1.92777	0.0538843	0.39925
ENSMUSG00000070044	212326	Fam149a	280.93	-0.307578	0.159697	1.92602	0.0541023	0.399292
ENSMUSG00000036052	56323	Dnajb5	2645.46	-0.3513	0.182346	1.92655	0.0540354	0.399292
ENSMUSG00000062006	68436	Rpl34	24.5754	0.416375	0.216056	-1.92717	0.0539588	0.399292
ENSMUSG00000039103	68810	Nexn	5936.7	0.260583	0.13531	-1.92582	0.0541271	0.399292
ENSMUSG00000060470	54672	Gpr97	72.8477	-0.409792	0.21277	1.92599	0.054106	0.399292
ENSMUSG00000015627	14464	Gata5	65.7701	-0.394171	0.20465	1.92607	0.0540954	0.399292
ENSMUSG00000036395	244757	Glb1l2	38.1853	-0.415509	0.215791	1.92551	0.0541651	0.399292
ENSMUSG00000004933	17179	Matk	31.9471	0.414821	0.215306	-1.92666	0.0540226	0.399292
ENSMUSG00000046699	245446	Slitrk4	45.3436	0.411823	0.213864	-1.92563	0.0541501	0.399292
ENSMUSG00000068917	12748	Clk2	444.514	0.242167	0.12565	-1.92731	0.0539411	0.399292
ENSMUSG00000024241	20662	Sos1	1077.04	0.262288	0.136277	-1.92467	0.0542704	0.399865
ENSMUSG00000041859	17215	Mcm3	232.547	-0.307157	0.15967	1.9237	0.0543923	0.400479
ENSMUSG00000017716	11799	Birc5	16.9932	0.406009	0.211071	-1.92357	0.0544088	0.400479
ENSMUSG00000040322	229731	Slc25a24	473.899	-0.258429	0.13448	1.92169	0.0546453	0.401812
ENSMUSG00000003812	13423	Dnase2a	302.16	-0.303287	0.15781	1.92185	0.0546245	0.401812
ENSMUSG00000018377	22344	Vezf1	2617.68	-0.198757	0.103468	1.92094	0.0547389	0.402297
ENSMUSG00000039745	53415	Htatip2	385.129	0.340114	0.177135	-1.92008	0.0548475	0.402687
ENSMUSG00000038387	20130	Rras	575.185	-0.297155	0.154851	1.91897	0.0549882	0.403312
ENSMUSG00000043943	72560	Naalad2	872.794	-0.338633	0.176502	1.91857	0.0550384	0.403476
ENSMUSG00000030811	233902	Fbxl19	162.18	0.347464	0.181143	-1.91818	0.0550884	0.403638
ENSMUSG00000026604	19250	Ptpn14	3346.13	-0.294942	0.153795	1.91776	0.055141	0.40382
ENSMUSG00000035024	78658	Ncapd3	1055.33	0.212224	0.110692	-1.91725	0.055206	0.403889
ENSMUSG00000021699	238871	Pde4d	2599.36	0.318534	0.166132	-1.91735	0.0551931	0.403889
ENSMUSG00000026179	56695	Pnkd	530.459	0.328642	0.171438	-1.91698	0.0552409	0.403941
ENSMUSG00000036867	17130	Smad6	872.937	-0.366428	0.191239	1.91607	0.0553565	0.404378
ENSMUSG00000021910	64652	Nisch	5251.28	0.252798	0.131923	-1.91626	0.0553325	0.404378
ENSMUSG00000019124	69938	Scrn1	529.909	-0.361141	0.188502	1.91584	0.0553852	0.404385
ENSMUSG00000024011	74116	Pi16	3953.68	-0.281928	0.147287	1.91414	0.055602	0.405559
ENSMUSG00000020893	18626	Per1	2040.66	0.353333	0.184658	-1.91344	0.0556915	0.405714
ENSMUSG00000025133	101861	Ints4	1679.05	-0.258754	0.135269	1.91288	0.055763	0.405714
ENSMUSG00000022371	12818	Col14a1	5198.96	-0.34137	0.178441	1.91306	0.05574	0.405714
ENSMUSG00000071369	26408	Map3k5	772.213	-0.236778	0.12378	1.9129	0.0557615	0.405714
ENSMUSG00000040860	230872	Crocc	173.907	0.345404	0.180542	-1.91315	0.055729	0.405714
ENSMUSG00000037851	105148	Iars	1598.64	0.241183	0.126109	-1.91249	0.0558133	0.405877
ENSMUSG00000055254	18212	Ntrk2	45.9458	-0.412618	0.215832	1.91176	0.0559074	0.406205
ENSMUSG00000090641	78251	Zfp712	117.398	-0.335095	0.175286	1.9117	0.0559144	0.406205
ENSMUSG00000046168	328424	Kcnrg	62.5351	0.377765	0.197659	-1.91119	0.0559797	0.406476
ENSMUSG00000027176	228410	Cstf3	370.303	0.295629	0.154713	-1.91082	0.0560271	0.406512
ENSMUSG00000020674	69675	Pxdn	3377.61	0.337918	0.176854	-1.91072	0.0560407	0.406512
ENSMUSG00000021192	27277	Golga5	1644.95	-0.245074	0.128316	1.90992	0.0561435	0.406692
ENSMUSG00000079507	15006	H2-Q1	33.2035	-0.404709	0.211904	1.90987	0.0561496	0.406692
ENSMUSG00000089945	11641	Gm20459	10587.6	-0.280392	0.146779	1.9103	0.0560951	0.406692
ENSMUSG00000038729	11641	Akap2	10587.6	-0.280392	0.146779	1.9103	0.0560951	0.406692
ENSMUSG00000030276	101100	Ttll3	79.0859	0.358679	0.187849	-1.90941	0.0562098	0.406926
ENSMUSG00000024037	57773	Wdr4	275.01	0.261096	0.136797	-1.90864	0.056308	0.407433
ENSMUSG00000001228	18140	Uhrf1	48.8706	0.41199	0.215904	-1.90821	0.0563636	0.407632
ENSMUSG00000010362	66599	Rdm1	535.945	-0.243668	0.127746	1.90744	0.0564634	0.40815
ENSMUSG00000006526	69179	Tmem110	367.266	-0.267844	0.140524	1.90603	0.0566466	0.409271
ENSMUSG00000044229	244853	Fam55d	38.7204	-0.409538	0.215057	1.90432	0.0568688	0.41009
ENSMUSG00000032249	11737	Anp32a	1700.48	-0.221402	0.116271	1.90419	0.0568854	0.41009
ENSMUSG00000037196	69310	Pacrg	47.6979	0.397234	0.208671	-1.90364	0.0569577	0.41009
ENSMUSG00000038416	69957	Cdc16	1808.26	-0.24582	0.129088	1.90428	0.0568736	0.41009
ENSMUSG00000031540	244349	Myst3	2730.58	0.24554	0.128968	-1.90389	0.0569249	0.41009
ENSMUSG00000026657	209630	Frmd4a	959.885	0.21842	0.114847	-1.90184	0.0571926	0.410219
ENSMUSG00000030691	207278	Fchsd2	960.311	0.242162	0.127288	-1.90248	0.0571087	0.410219
ENSMUSG00000001983	70207	Taco1	854.328	0.248373	0.130581	-1.90207	0.0571622	0.410219
ENSMUSG00000024302	13527	Dtna	1912.51	-0.282233	0.148399	1.90185	0.0571904	0.410219
ENSMUSG00000032359	13036	Ctsh	1270.33	-0.240973	0.12671	1.90177	0.0572017	0.410219
ENSMUSG00000049439	77951	Cyp20a1	530.311	-0.322143	0.169328	1.90248	0.0571087	0.410219
ENSMUSG00000031400	14381	G6pdx	283.096	-0.306991	0.161419	1.90182	0.0571947	0.410219
ENSMUSG00000040714	232943	Klc3	19.1448	-0.405268	0.213021	1.90247	0.0571091	0.410219
ENSMUSG00000025610	224419	ORF63	18.6376	0.410723	0.215996	-1.90153	0.0572329	0.41024
ENSMUSG00000022957	16443	Itsn1	2418.15	0.209199	0.110081	-1.90041	0.0573799	0.410395
ENSMUSG00000019831	83767	Wasf1	25.3981	0.410258	0.215835	-1.90079	0.0573291	0.410395
ENSMUSG00000045394	17075	Epcam	58.464	-0.408189	0.214804	1.90028	0.0573959	0.410395
ENSMUSG00000034872	209047	Gipc3	16.7228	0.406857	0.214094	-1.90036	0.0573857	0.410395
ENSMUSG00000025758	20873	Plk4	67.8179	0.377148	0.198468	-1.9003	0.0573944	0.410395
ENSMUSG00000019494	26893	Cops6	1148.2	0.234241	0.123351	-1.89898	0.0575668	0.411414
ENSMUSG00000031591	11886	Asah1	1429.44	-0.237576	0.125123	1.89873	0.0575994	0.411444
ENSMUSG00000029524	75387	Sirt4	189.687	0.285891	0.150644	-1.8978	0.0577231	0.411688
ENSMUSG00000025355	58223	Mmp19	251.504	-0.334735	0.176387	1.89773	0.0577318	0.411688
ENSMUSG00000040488	108075	Ltbp4	16620.2	-0.305234	0.160851	1.89761	0.0577469	0.411688
ENSMUSG00000026960	65103	Arl6ip6	311.946	0.264345	0.139365	-1.89679	0.057856	0.412061
ENSMUSG00000057337	53374	Chst3	71.7225	-0.38849	0.204814	1.8968	0.0578549	0.412061
ENSMUSG00000060594	244864	Layn	265.021	-0.29627	0.156255	1.89607	0.0579502	0.412096
ENSMUSG00000029363	72151	Rfc5	126.891	0.369569	0.194932	-1.89589	0.0579746	0.412096
ENSMUSG00000029596	257635	Sdsl	141.292	0.348296	0.183659	-1.89643	0.0579031	0.412096
ENSMUSG00000050605	22719	Zfp61	93.2033	-0.351639	0.18545	1.89613	0.0579425	0.412096
ENSMUSG00000020111	216001	Micu1	625.127	-0.235391	0.124183	1.89552	0.0580232	0.41224
ENSMUSG00000062190	71835	Lancl2	458.451	-0.29286	0.154529	1.89519	0.0580676	0.412354
ENSMUSG00000044393	13511	Dsg2	3574.12	0.279468	0.14752	-1.89445	0.0581658	0.412641
ENSMUSG00000001348	11433	Acp5	88.7751	-0.380487	0.200866	1.89424	0.0581934	0.412641
ENSMUSG00000041351	110351	Rap1gap	344.919	0.36591	0.193131	-1.89462	0.0581426	0.412641
ENSMUSG00000028780	20348	Sema3c	2135.94	-0.301812	0.1595	1.89224	0.0584596	0.414327
ENSMUSG00000046556	79233	Zfp319	455.262	0.300379	0.158779	-1.8918	0.0585172	0.414533
ENSMUSG00000064202	381218	4430402I18Rik	435.423	-0.254335	0.134464	1.89147	0.058562	0.414648
ENSMUSG00000020696	67338	Rffl	238.064	-0.276917	0.146461	1.89073	0.058661	0.415146
ENSMUSG00000030930	77590	Chst15	493.643	-0.296512	0.156861	1.89029	0.0587191	0.415354
ENSMUSG00000021782	71228	Dlg5	528.157	0.304192	0.161008	-1.88929	0.0588527	0.416097
ENSMUSG00000031765	17748	Mt1	2418.02	-0.355076	0.187987	1.88884	0.0589138	0.416326
ENSMUSG00000049076	78618	Acap2	2213.86	-0.250881	0.132913	1.88756	0.0590852	0.417131
ENSMUSG00000026113	269180	Inpp4a	1260.79	0.282897	0.149871	-1.88761	0.0590784	0.417131
ENSMUSG00000037005	170745	Xpnpep2	303.093	-0.352534	0.186827	1.88695	0.0591667	0.417322
ENSMUSG00000040111	235283	Gramd1b	151.845	0.314786	0.166871	-1.8864	0.0592404	0.417466
ENSMUSG00000040703	74134	Cyp2s1	376.026	-0.367694	0.194924	1.88635	0.0592477	0.417466
ENSMUSG00000036160	20935	Surf6	316.886	-0.266854	0.141498	1.88591	0.0593066	0.417678
ENSMUSG00000038508	23886	Gdf15	15.9341	0.378393	0.200685	-1.88551	0.0593613	0.417808
ENSMUSG00000006373	53328	Pgrmc1	1068.81	-0.291207	0.154458	1.88535	0.0593825	0.417808
ENSMUSG00000023055	67488	Calcoco1	2099.56	0.312058	0.165609	-1.88431	0.0595228	0.418592
ENSMUSG00000051669	239691	AU021092	194.604	-0.372529	0.197806	1.8833	0.0596594	0.419349
ENSMUSG00000004951	15507	Hspb1	1606.3	-0.350123	0.185993	1.88245	0.0597756	0.419963
ENSMUSG00000021556	105348	Golm1	2120.17	-0.256027	0.136048	1.88188	0.0598518	0.420122
ENSMUSG00000059854	244653	Hydin	192.495	0.397668	0.211317	-1.88185	0.0598562	0.420122
ENSMUSG00000025010	240665	Ccnj	161.31	-0.316033	0.168001	1.88114	0.0599532	0.420397
ENSMUSG00000031273	94216	Col4a6	1234.93	-0.264327	0.140507	1.88124	0.0599398	0.420397
ENSMUSG00000033697	223666	Arhgap39	232.733	0.277788	0.14771	-1.88063	0.0600216	0.420673
ENSMUSG00000030795	233908	Fus	370.45	0.333708	0.177639	-1.87858	0.0603023	0.422233
ENSMUSG00000036292	207798	Gramd1c	100.499	0.365835	0.194735	-1.87863	0.0602946	0.422233
ENSMUSG00000002055	54141	Spag5	20.7006	0.389135	0.207186	-1.87819	0.060355	0.422398
ENSMUSG00000027067	20833	Ssrp1	1791.32	-0.239466	0.127538	1.8776	0.0604355	0.422757
ENSMUSG00000029093	81840	Sorcs2	189.328	0.315384	0.167998	-1.87731	0.0604758	0.422818
ENSMUSG00000032118	235180	Fez1	24.4152	-0.40453	0.215529	1.87692	0.0605295	0.422818
ENSMUSG00000032119	102423	Hinfp	208.382	0.288198	0.15355	-1.8769	0.0605316	0.422818
ENSMUSG00000020901	320207	Pik3r5	85.7687	0.352087	0.187692	-1.87587	0.0606728	0.423601
ENSMUSG00000026471	15064	Mr1	1061.65	-0.228874	0.122129	1.87403	0.0609264	0.425167
ENSMUSG00000023026	239667	Dip2b	3012.98	0.272164	0.145421	-1.87155	0.0612682	0.427142
ENSMUSG00000020493	270906	Prr11	14.455	0.39176	0.209413	-1.87075	0.0613796	0.427712
ENSMUSG00000006423	77644	C330007P06Rik	415.019	-0.280883	0.150162	1.87054	0.0614095	0.427715
ENSMUSG00000018678	78912	Sp2	176.118	0.349158	0.186801	-1.86914	0.0616031	0.428459
ENSMUSG00000032185	59035	Carm1	1301.9	0.300243	0.160642	-1.86902	0.0616205	0.428459
ENSMUSG00000063652	56517	Slc22a21	40.1317	-0.386124	0.206574	1.86919	0.061597	0.428459
ENSMUSG00000038801	338417	Scgb1c1	79.8233	0.395513	0.211627	-1.86892	0.0616343	0.428459
ENSMUSG00000048612	226101	Myof	1363.76	-0.259128	0.138708	1.86816	0.0617393	0.428983
ENSMUSG00000021597	105377	Ankrd32	1357.5	-0.276948	0.148319	1.86724	0.0618676	0.429378
ENSMUSG00000015659	321007	Serac1	776.719	0.25066	0.13425	-1.86712	0.0618849	0.429378
ENSMUSG00000030057	12785	Cnbp	6482.78	-0.23769	0.127301	1.86715	0.06188	0.429378
ENSMUSG00000032420	23959	Nt5e	1244.71	-0.336628	0.180396	1.86606	0.0620335	0.430204
ENSMUSG00000061207	54402	Stk19	77.9306	0.378116	0.202676	-1.86562	0.0620945	0.430421
ENSMUSG00000025529	245595	Zfp711	54.1291	-0.383018	0.205418	1.86458	0.0622404	0.431021
ENSMUSG00000061898	57782	Rbak	292.961	-0.265601	0.142443	1.86462	0.0622348	0.431021
ENSMUSG00000040877	212198	Wdr25	108.104	0.35139	0.188596	-1.86319	0.0624353	0.431226
ENSMUSG00000035878	235386	Agphd1	130.142	0.373421	0.200529	-1.86218	0.062578	0.431226
ENSMUSG00000015776	20933	Med22	715.068	-0.22855	0.122742	1.86204	0.0625968	0.431226
ENSMUSG00000053094	71667	0610007L01Rik	1740.41	-0.201099	0.107953	1.86284	0.0624841	0.431226
ENSMUSG00000028497	66775	Ptplad2	226.93	-0.317667	0.170549	1.86262	0.0625159	0.431226
ENSMUSG00000060924	94109	Csmd1	114.776	0.372001	0.199679	-1.863	0.0624628	0.431226
ENSMUSG00000022518	78809	4930562C15Rik	22.9342	0.399913	0.214593	-1.86359	0.0623792	0.431226
ENSMUSG00000093500	78809	RP23-354F11.3	22.9342	0.399913	0.214593	-1.86359	0.0623792	0.431226
ENSMUSG00000026029	12370	Casp8	268.113	0.266399	0.143005	-1.86287	0.0624808	0.431226
ENSMUSG00000042532	71146	Golga7b	34.219	0.401956	0.216065	-1.86035	0.0628366	0.432185
ENSMUSG00000040086	435766	Tnni3k	705.061	0.246428	0.132476	-1.86017	0.0628618	0.432185
ENSMUSG00000021360	14538	Gcnt2	552.261	-0.286759	0.154145	1.86032	0.0628402	0.432185
ENSMUSG00000040466	233016	Blvrb	397.28	-0.261627	0.140704	1.85942	0.0629683	0.432349
ENSMUSG00000009035	223693	Tmem184b	1054.35	0.234385	0.126208	-1.85713	0.0632925	0.432755
ENSMUSG00000048038	329366	4932418E24Rik	17.1846	-0.399442	0.215101	1.85699	0.063312	0.432755
ENSMUSG00000033253	230676	Szt2	1043.88	0.300081	0.161533	-1.8577	0.0632111	0.432755
ENSMUSG00000040102	232539	Klhdc5	545.699	-0.253095	0.136248	1.8576	0.0632263	0.432755
ENSMUSG00000025037	17161	Maoa	476.084	-0.248393	0.133716	1.85761	0.0632237	0.432755
ENSMUSG00000027200	214968	Sema6d	3285.11	-0.209212	0.112661	1.857	0.0633107	0.432755
ENSMUSG00000027907	20195	S100a11	53.9168	0.372966	0.200788	-1.85751	0.0632382	0.432755
ENSMUSG00000048388	241520	Fam171b	72.6118	-0.35255	0.189714	1.85832	0.0631231	0.432755
ENSMUSG00000034101	12388	Ctnnd1	4666.9	0.20346	0.10957	-1.8569	0.0633256	0.432755
ENSMUSG00000073988	50500	Ttpa	20.6137	-0.396888	0.213849	1.85592	0.0634646	0.433242
ENSMUSG00000039304	22035	Tnfsf10	567.034	-0.329739	0.177683	1.85577	0.0634865	0.433242
ENSMUSG00000046110	574418	Serinc4	55.5842	0.365548	0.197004	-1.85553	0.0635202	0.433269
ENSMUSG00000039529	54670	Atp8b1	712.707	-0.290736	0.15677	1.85453	0.0636628	0.434037
ENSMUSG00000041229	320595	Phf8	814.23	0.214134	0.115485	-1.8542	0.06371	0.434083
ENSMUSG00000025407	14632	Gli1	54.7242	0.394831	0.212954	-1.85407	0.0637293	0.434083
ENSMUSG00000056014	243308	A430033K04Rik	167.126	-0.307704	0.165987	1.85378	0.0637707	0.434161
ENSMUSG00000035900	223752	Gramd4	1076.22	0.278495	0.150269	-1.85331	0.0638381	0.434416
ENSMUSG00000069206	238692	Zfp874a	207.678	-0.28949	0.156279	1.85239	0.0639701	0.435111
ENSMUSG00000071074	28064	Yipf3	643.656	0.312969	0.169046	-1.85138	0.0641144	0.435888
ENSMUSG00000048371	382051	Pdp2	670.298	-0.310716	0.167873	1.8509	0.0641833	0.436152
ENSMUSG00000020068	67307	Pbld2	78.2212	0.362255	0.19585	-1.84966	0.0643631	0.437169
ENSMUSG00000029571	71900	Tmem106b	4571.9	-0.235386	0.127412	1.84743	0.0646843	0.438121
ENSMUSG00000017692	246104	Rhbdl3	1461.62	-0.273848	0.148219	1.84759	0.0646612	0.438121
ENSMUSG00000024513	17191	Mbd2	1636.84	-0.223586	0.120973	1.84823	0.0645689	0.438121
ENSMUSG00000021975	210925	Ints9	257.023	0.309958	0.167745	-1.84779	0.0646328	0.438121
ENSMUSG00000034570	170835	Inpp5j	712.53	0.341106	0.184613	-1.84768	0.0646481	0.438121
ENSMUSG00000024579	240334	Pcyox1l	66.2404	0.347706	0.188241	-1.84713	0.0647278	0.438211
ENSMUSG00000051285	319263	Pcmtd1	3010.79	-0.231382	0.125321	1.84631	0.0648479	0.438437
ENSMUSG00000038872	11906	Zfhx3	722.158	0.259073	0.140353	-1.84586	0.0649122	0.438437
ENSMUSG00000035373	20306	Ccl7	28.1117	0.391847	0.212278	-1.84591	0.0649052	0.438437
ENSMUSG00000054517	338364	Trim65	251.896	0.284016	0.153845	-1.84612	0.0648743	0.438437
ENSMUSG00000032816	56741	Igdcc4	828.602	0.337472	0.182987	-1.84424	0.0651486	0.439829
ENSMUSG00000058761	108937	Rnf169	1045.78	-0.22149	0.12013	1.84376	0.0652179	0.440092
ENSMUSG00000035189	320091	Ano4	615.309	0.233487	0.126673	-1.84322	0.0652971	0.440421
ENSMUSG00000046714	14234	Foxc2	180.983	-0.3642	0.197687	1.84231	0.0654303	0.440771
ENSMUSG00000040472	56187	Rabggta	423.342	0.261593	0.14197	-1.84259	0.0653886	0.440771
ENSMUSG00000039879	380629	Heca	1524.26	-0.212024	0.115162	1.8411	0.0656073	0.441693
ENSMUSG00000067851	211673	Arfgef1	10178.1	0.218763	0.11889	-1.84004	0.0657617	0.441913
ENSMUSG00000039252	246316	Lgi2	36.1467	0.393898	0.214064	-1.84009	0.0657545	0.441913
ENSMUSG00000024059	78785	Clip4	6426.17	0.230456	0.125229	-1.84027	0.0657285	0.441913
ENSMUSG00000055491	226169	Pprc1	557.361	0.281689	0.153267	-1.8379	0.0660773	0.44255
ENSMUSG00000042742	101148	B630005N14Rik	616.691	-0.275775	0.150136	1.83683	0.0662353	0.44255
ENSMUSG00000023191	14789	Leprel2	701.422	-0.238882	0.129953	1.83822	0.0660305	0.44255
ENSMUSG00000033114	70484	Slc35d2	101.655	-0.316328	0.172306	1.83585	0.0663801	0.44255
ENSMUSG00000044807	30944	Zfp354c	318.266	-0.283722	0.15456	1.83568	0.0664053	0.44255
ENSMUSG00000032252	93683	Glce	701.158	-0.25963	0.141292	1.83754	0.0661304	0.44255
ENSMUSG00000036948	231807	BC037034	202.069	0.311381	0.169625	-1.8357	0.0664022	0.44255
ENSMUSG00000091964	231807	BC037034	202.069	0.311381	0.169625	-1.8357	0.0664022	0.44255
ENSMUSG00000020251	74782	Glt8d2	328.467	-0.321178	0.174904	1.8363	0.0663128	0.44255
ENSMUSG00000052373	13384	Mpp3	34.1415	0.389429	0.212067	-1.83635	0.0663063	0.44255
ENSMUSG00000041241	68350	Mul1	1173.42	0.276313	0.150374	-1.8375	0.0661361	0.44255
ENSMUSG00000030064	232288	Frmd4b	1405.43	-0.237801	0.129362	1.83826	0.0660235	0.44255
ENSMUSG00000040441	216441	Slc26a10	266.664	0.383709	0.208731	-1.83829	0.0660198	0.44255
ENSMUSG00000028098	67845	Rnf115	601.644	-0.267098	0.145407	1.8369	0.0662243	0.44255
ENSMUSG00000029068	56036	Ccnl2	1050.61	0.23127	0.125842	-1.83778	0.0660952	0.44255
ENSMUSG00000025544	68059	Tm9sf2	5269.31	-0.221528	0.1206	1.83688	0.0662273	0.44255
ENSMUSG00000044072	237711	Eml6	573.066	0.244198	0.1331	-1.83469	0.0665517	0.442915
ENSMUSG00000049001	68169	A930038C07Rik	1669.15	0.395738	0.215693	-1.83473	0.0665458	0.442915
ENSMUSG00000028159	26377	Dapp1	886.424	0.363977	0.198427	-1.83431	0.0666085	0.44309
ENSMUSG00000046380	16469	Jrk	265.228	-0.259548	0.141531	1.83385	0.0666757	0.443334
ENSMUSG00000038459	70178	Fam108c	681.503	0.285284	0.155702	-1.83225	0.0669142	0.444512
ENSMUSG00000042790	235315	Rnf214	1188.39	0.216402	0.118142	-1.83171	0.0669947	0.44464
ENSMUSG00000015697	84505	Setdb1	815.586	0.23298	0.12718	-1.83189	0.0669676	0.44464
ENSMUSG00000044534	59289	Ccbp2	137.561	-0.313723	0.171355	1.83083	0.0671255	0.444919
ENSMUSG00000016758	12124	Bik	119.059	-0.344497	0.188166	1.83081	0.0671287	0.444919
ENSMUSG00000033458	330554	Fan1	333.552	0.270997	0.148002	-1.83104	0.0670946	0.444919
ENSMUSG00000032478	54369	Nme6	185.748	0.306134	0.167256	-1.83033	0.0672007	0.44499
ENSMUSG00000021690	57748	Jmy	2637.62	0.246611	0.134727	-1.83046	0.0671813	0.44499
ENSMUSG00000039960	69581	Rhou	524.582	-0.315902	0.172614	1.8301	0.0672343	0.445009
ENSMUSG00000018920	66102	Cxcl16	441.499	-0.264017	0.1443	1.82964	0.0673041	0.445066
ENSMUSG00000025766	73852	D3Ertd751e	128.754	0.353669	0.19328	-1.82983	0.0672761	0.445066
ENSMUSG00000038473	70729	Nos1ap	190.749	0.338533	0.185056	-1.82935	0.0673473	0.445148
ENSMUSG00000041895	52639	Wipi1	2269	0.241463	0.132071	-1.82828	0.067507	0.445498
ENSMUSG00000044951	238564	Mylk4	6083.66	0.304353	0.166479	-1.82818	0.0675229	0.445498
ENSMUSG00000031833	546071	Mast3	272.862	0.315062	0.172574	-1.82566	0.0679009	0.447382
ENSMUSG00000025787	331046	Tgm4	289.328	-0.250071	0.136962	1.82584	0.0678743	0.447382
[truncated: 38,926 more rows]
