# Supplementary material for: An atrial fibrillation-associated regulatory region modulates cardiac Tbx5 levels and arrhythmia susceptibility
Source: eLife. 2023 Jan 30;12:e80317. doi: 10.7554/eLife.80317 (PMC9928424; doi:10.7554/eLife.80317)
Supplement: Supplementary file 4. [file elife-80317-supp4.xlsx]

## Sheet: Sheet1
Supplemental file 4. RNAseq comparison of Tbx5RE(int)KO and Tbx5G125R het adult left atria
			Tbx5RE(int)KO			Tbx5 G125R het
Ensembl Gene ID	EntrezGene ID	Associated Gene Name	Log2FC (+ is higher in RE(int)-/-)	P-value	P-adj	Log2FC (+ is higher in T5G125R het)	P-value	P-adj
ENSMUSG00000023905	27279	Tnfrsf12a	-2.6082	4.93542e-50	7.33107e-46	0.253834	0.378532	0.628684
ENSMUSG00000024803	107765	Ankrd1	-1.43742	2.71407e-48	2.01574e-44	-0.505232	0.0264414	0.209506
ENSMUSG00000022816	14314	Fstl1	-1.34434	2.50785e-38	1.24172e-34	-0.190968	0.388745	0.636616
ENSMUSG00000031994	30806	Adamts8	-2.41505	7.91962e-37	2.94095e-33	-0.601702	0.00813548	0.122825
ENSMUSG00000026193	14268	Fn1	-1.27445	6.82345e-27	2.02711e-23	-0.296037	0.253238	0.520494
ENSMUSG00000031636	53318	Pdlim3	-1.24095	3.97387e-25	9.83798e-22	-0.582202	0.000894599	0.036573
ENSMUSG00000039115	104099	Itga9	-1.27274	4.31953e-24	9.16604e-21	-0.0227206	0.899223	0.95451
ENSMUSG00000021136	64075	Smoc1	-1.50631	5.71431e-24	1.061e-20	-0.368057	0.114811	0.370562
ENSMUSG00000021614	13003	Vcan	-1.27816	1.91421e-22	3.15929e-19	-0.323353	0.213015	0.480655
ENSMUSG00000039004	12161	Bmp6	-1.70981	2.25754e-22	3.35335e-19	0.186523	0.433832	0.669945
ENSMUSG00000030116	50530	Mfap5	-1.39285	5.28469e-22	7.13626e-19	0.0665297	0.77814	0.892158
ENSMUSG00000054728	218194	Phactr1	1.04373	2.10776e-21	2.60905e-18	1.24543	2.31e-10	8.4e-08
ENSMUSG00000024008	240058	Cpne5	1.53609	1.94896e-20	2.22691e-17	0.939683	0.000227175	0.0140736
ENSMUSG00000060187	237560	Lrrc10	-1.64417	2.92595e-20	3.10443e-17	0.309809	0.216409	0.484334
ENSMUSG00000021870	83997	Slmap	-0.980216	1.08278e-19	1.07224e-16	-0.686857	0.000831213	0.0346632
ENSMUSG00000032902	20501	Slc16a1	-1.0073	3.3401e-19	2.84298e-16	-0.470765	0.0145289	0.161414
ENSMUSG00000045967	241263	Gpr158	1.21547	3.44511e-19	2.84298e-16	-0.127827	0.560455	0.759625
ENSMUSG00000027858	70747	Tspan2	-1.27799	3.42486e-19	2.84298e-16	-0.284638	0.221872	0.489559
ENSMUSG00000046694	100342	Fam46b	-1.85494	1.53545e-18	1.2004e-15	-0.281076	0.339548	0.595252
ENSMUSG00000055976	71908	Cldn23	-2.32652	2.09057e-18	1.55267e-15	0.8172	0.00457235	0.0943989
ENSMUSG00000031849	12845	Comp	-1.41414	2.6624e-18	1.88321e-15	-0.43136	0.101987	0.355101
ENSMUSG00000039835	215819	Nhsl1	0.950989	4.60351e-18	3.10821e-15	-0.316973	0.0522058	0.274978
ENSMUSG00000061718	19049	Ppp1r1b	0.981084	5.39873e-18	3.48664e-15	0.577631	0.0254331	0.207334
ENSMUSG00000028339	12819	Col15a1	-1.06349	5.80585e-18	3.59334e-15	0.227521	0.300505	0.5597
ENSMUSG00000027955	68659	Fam198b	-1.06169	9.38915e-18	5.57865e-15	-0.542554	0.00636876	0.109954
ENSMUSG00000030208	13730	Emp1	-0.993014	1.75246e-17	1.00119e-14	-0.40713	0.106673	0.361302
ENSMUSG00000037820	21817	Tgm2	-1.06637	3.6284e-17	1.99616e-14	0.0510073	0.818778	0.913561
ENSMUSG00000070424	11875	Art5	1.24309	5.58325e-17	2.96192e-14	0.887559	0.000531146	0.0258539
ENSMUSG00000046818	73284	Ddit4l	1.84005	1.0781e-16	5.52209e-14	0.754409	0.000391526	0.020542
ENSMUSG00000020644	15902	Id2	-1.18734	1.45893e-16	6.99063e-14	-0.628956	0.00363005	0.0848022
ENSMUSG00000028341	18124	Nr4a3	-1.91134	1.76979e-16	8.21513e-14	-1.3547	6.18e-06	0.000749873
ENSMUSG00000070348	12443	Ccnd1	-1.6549	2.56541e-16	1.15475e-13	-0.203998	0.349023	0.604365
ENSMUSG00000018822	54612	Sfrp5	1.42809	6.46802e-16	2.82577e-13	-0.197445	0.485781	0.707006
ENSMUSG00000026814	13805	Eng	-1.23565	9.312e-16	3.95201e-13	-0.117714	0.579826	0.77137
ENSMUSG00000032487	19225	Ptgs2	-1.39991	1.03055e-15	4.25216e-13	-0.661414	0.00550758	0.102729
ENSMUSG00000024486	15200	Hbegf	-1.57676	1.62278e-15	6.51479e-13	-0.196918	0.423791	0.66292
ENSMUSG00000022206	18162	Npr3	-1.13486	1.76636e-15	6.90463e-13	-0.719066	0.00120964	0.044911
ENSMUSG00000036040	77794	Adamtsl2	-1.57845	3.29523e-15	1.25506e-12	1.20781	4.45e-07	7.81e-05
ENSMUSG00000033595	213469	Lgi3	1.57835	3.42292e-15	1.2711e-12	0.717891	0.0110934	0.143642
ENSMUSG00000039361	233489	Picalm	-1.3076	5.52259e-15	2.00079e-12	-0.395901	0.0589942	0.28901
ENSMUSG00000042436	76293	Mfap4	-1.20739	6.82599e-15	2.41412e-12	0.732746	0.00266089	0.07081
ENSMUSG00000038173	320981	Enpp6	-1.24679	1.22693e-14	4.23832e-12	-0.512806	0.0224261	0.195321
ENSMUSG00000001930	22371	Vwf	-1.21806	1.38282e-14	4.66827e-12	-0.205108	0.392839	0.639528
ENSMUSG00000021983	50769	Atp8a2	1.03905	1.49729e-14	4.9424e-12	0.63507	0.00314572	0.0774687
ENSMUSG00000036086	226409	Zranb3	1.14067	1.80915e-14	5.84198e-12	0.389848	0.0539806	0.279112
ENSMUSG00000029675	13717	Eln	-1.4327	3.5834e-14	1.13251e-11	0.448383	0.028817	0.216208
ENSMUSG00000056367	242894	Actr3b	1.0079	4.80807e-14	1.4879e-11	-0.180548	0.311218	0.568867
ENSMUSG00000027435	17064	Cd93	-0.980105	6.4445e-14	1.9536e-11	-0.236441	0.155709	0.422166
ENSMUSG00000022665	67896	Ccdc80	-0.875297	7.79744e-14	2.31646e-11	-0.116678	0.554752	0.755909
ENSMUSG00000018593	20692	Sparc	-0.883205	1.85502e-13	5.40284e-11	0.065354	0.671233	0.830073
ENSMUSG00000063275	30963	Ptpla	-1.18946	1.99748e-13	5.70587e-11	0.23111	0.292657	0.552482
ENSMUSG00000026043	12825	Col3a1	-1.11992	2.14419e-13	6.00939e-11	-0.168511	0.429433	0.666323
ENSMUSG00000032231	12306	Anxa2	-1.04159	2.51917e-13	6.92957e-11	0.0833216	0.706142	0.848933
ENSMUSG00000053166	104010	Cdh22	1.62407	3.00484e-13	8.11525e-11	2.19106	3.09e-17	2.65e-14
ENSMUSG00000047485	245683	Klhl34	-1.56069	3.28842e-13	8.72254e-11	0.187849	0.521443	0.73169
ENSMUSG00000018217	18858	Pmp22	-0.814278	4.00125e-13	1.04271e-10	-0.333795	0.0653719	0.299755
ENSMUSG00000074059	546161	Fbxw18	-1.15191	5.19465e-13	1.33037e-10	-0.29173	0.0972003	0.348268
ENSMUSG00000020044	21859	Timp3	-0.89464	5.52108e-13	1.36683e-10	-0.329715	0.0547863	0.280966
ENSMUSG00000034675	56320	Dbn1	-1.11017	5.70974e-13	1.39037e-10	-0.0635244	0.802759	0.904004
ENSMUSG00000027377	228576	Mall	-1.43377	6.24454e-13	1.49607e-10	-0.338434	0.198103	0.467898
ENSMUSG00000031825	78892	Crispld2	-0.791359	8.27507e-13	1.95108e-10	0.0704097	0.740916	0.870551
ENSMUSG00000001493	17285	Meox1	-1.45858	9.70528e-13	2.25254e-10	0.603171	0.00527947	0.101235
ENSMUSG00000028273	56376	Pdlim5	-0.800685	1.31064e-12	2.99511e-10	-0.47787	0.0234896	0.199806
ENSMUSG00000005611	17540	Mrvi1	1.09353	1.41877e-12	3.19308e-10	-1.45945	1.85e-11	9e-09
ENSMUSG00000029580	11461	Actb	-1.00314	1.54712e-12	3.43e-10	-0.140733	0.357994	0.611531
ENSMUSG00000007122	12372	Casq1	-1.35962	1.77814e-12	3.88419e-10	-0.786132	0.000383002	0.0202699
ENSMUSG00000032064	330938	Dixdc1	0.972206	1.82201e-12	3.92235e-10	-0.459504	0.00907224	0.130472
ENSMUSG00000038777	20360	Sema6c	0.971351	2.38432e-12	5.05953e-10	0.854313	0.0035936	0.08443
ENSMUSG00000034845	84094	Plvap	-1.1093	2.6731e-12	5.59243e-10	-0.364497	0.140584	0.4032
ENSMUSG00000054690	59308	Emcn	-1.20016	4.68211e-12	9.65946e-10	-0.534666	0.0139677	0.159308
ENSMUSG00000036545	216725	Adamts2	-0.848383	7.09354e-12	1.44339e-09	0.180771	0.366542	0.618153
ENSMUSG00000020181	260315	Nav3	0.976368	9.16879e-12	1.81591e-09	-0.107533	0.604254	0.788232
ENSMUSG00000040247	108995	Tbc1d10c	1.136	9.08513e-12	1.81591e-09	1.03109	7.18e-05	0.00567749
ENSMUSG00000028613	16975	Lrp8	-1.11934	9.6775e-12	1.89144e-09	-0.166325	0.43895	0.673678
ENSMUSG00000063564	237759	Col23a1	-1.09965	9.80518e-12	1.89151e-09	-0.302775	0.230507	0.498483
ENSMUSG00000031328	192176	Flna	-0.871673	1.29576e-11	2.4676e-09	0.183562	0.424066	0.66292
ENSMUSG00000037458	54375	Azin1	-0.752669	1.85169e-11	3.48165e-09	-0.333777	0.0953722	0.346256
ENSMUSG00000019817	22634	Plagl1	-0.89588	1.87976e-11	3.49024e-09	-0.528691	0.0196617	0.184975
ENSMUSG00000038156	233744	Spon1	-0.874603	2.17367e-11	3.98613e-09	-0.309455	0.119802	0.375979
ENSMUSG00000022885	20440	St6gal1	-1.10563	3.19265e-11	5.64568e-09	-0.368367	0.107479	0.361995
ENSMUSG00000026042	12832	Col5a2	-0.926003	3.18655e-11	5.64568e-09	-0.158137	0.447397	0.679068
ENSMUSG00000031799	326618	Tpm4	-1.00672	3.24215e-11	5.66575e-09	-0.536718	0.000622322	0.0286623
ENSMUSG00000054871	72309	Tmem158	-1.43515	3.32302e-11	5.73955e-09	-0.153735	0.563743	0.761812
ENSMUSG00000027248	14827	Pdia3	-0.668867	4.63838e-11	7.91936e-09	-0.271531	0.0734649	0.312886
ENSMUSG00000039661	66959	Dusp26	1.73982	4.70414e-11	7.94038e-09	-0.274954	0.296045	NA
ENSMUSG00000030787	114332	Lyve1	-1.22226	6.48665e-11	1.08262e-08	-0.818048	0.000275256	0.0158343
ENSMUSG00000027887	17306	Sypl2	1.47748	7.77582e-11	1.28336e-08	0.578654	0.0171538	0.173488
ENSMUSG00000050840	23836	Cdh20	1.57931	8.02157e-11	1.30937e-08	-1.20966	4.97e-05	0.00430339
ENSMUSG00000038633	13244	Degs1	-0.791316	8.14843e-11	1.31562e-08	-0.266356	0.0259815	0.208799
ENSMUSG00000068614	11464	Actc1	-0.901486	8.25275e-11	1.31813e-08	0.0986068	0.607591	0.790107
ENSMUSG00000026638	54139	Irf6	-0.947296	9.47098e-11	1.49662e-08	-0.515536	0.0148485	0.162976
ENSMUSG00000019732	73316	Calr3	0.827675	9.90439e-11	1.54863e-08	-0.343269	0.0912601	0.339502
ENSMUSG00000067377	56496	Tspan6	-1.25742	1.06655e-10	1.65026e-08	-0.507763	0.0175528	0.175789
ENSMUSG00000013089	104156	Etv5	-1.14521	1.15874e-10	1.77442e-08	0.854331	0.00038194	0.0202699
ENSMUSG00000051236	320183	Msrb3	-0.645427	1.1818e-10	1.79127e-08	-0.186431	0.193679	0.463009
ENSMUSG00000001240	54409	Ramp2	-1.16728	1.27486e-10	1.9128e-08	0.0821508	0.752454	0.876805
ENSMUSG00000019122	20308	Ccl9	-1.33525	1.30099e-10	1.93249e-08	-0.883645	5.6e-05	0.00470926
ENSMUSG00000040721	239102	Zfhx2	1.25207	1.45166e-10	2.11401e-08	0.0196734	0.944297	0.977055
ENSMUSG00000024899	23972	Papss2	-0.923971	1.49692e-10	2.15876e-08	-0.211109	0.235372	0.502681
ENSMUSG00000026483	63913	Fam129a	-0.692797	1.7577e-10	2.48656e-08	-0.202939	0.195737	0.465179
ENSMUSG00000024654	66514	Asrgl1	0.827803	1.7482e-10	2.48656e-08	0.429413	0.0131809	0.154208
ENSMUSG00000016382	102866	Pls3	-0.833776	2.07338e-10	2.90546e-08	-0.203817	0.16421	0.431015
ENSMUSG00000026640	18845	Plxna2	-0.873994	2.23851e-10	3.07878e-08	-0.0623848	0.70893	0.850345
ENSMUSG00000041445	105450	Mmrn2	-0.947562	2.60912e-10	3.55558e-08	-0.522656	0.00855646	0.127072
ENSMUSG00000027894	229706	Slc6a17	1.09495	2.64938e-10	3.57763e-08	0.243332	0.243247	0.510353
ENSMUSG00000038702	319901	Dsel	-0.90224	2.79087e-10	3.73474e-08	-0.446587	0.0423997	0.251629
ENSMUSG00000003814	12317	Calr	-0.779587	3.02899e-10	4.0172e-08	0.228004	0.184363	0.452025
ENSMUSG00000020717	18613	Pecam1	-1.08444	3.22908e-10	4.24467e-08	-0.169829	0.486067	0.707281
ENSMUSG00000029231	18595	Pdgfra	-0.647455	3.30533e-10	4.30679e-08	-0.250329	0.230723	0.498654
ENSMUSG00000048120	12495	Entpd1	-1.27879	3.80068e-10	4.86683e-08	-0.603542	0.00537072	0.102164
ENSMUSG00000048218	105827	Amigo2	-0.988796	3.78404e-10	4.86683e-08	-0.707295	0.00108989	0.0415242
ENSMUSG00000032925	223272	Itgbl1	-0.83715	3.89468e-10	4.94458e-08	-0.118374	0.582052	0.773074
ENSMUSG00000079243	22437	Xirp1	-1.15317	4.35379e-10	5.48061e-08	-0.302438	NA	NA
ENSMUSG00000000753	20317	Serpinf1	-0.917872	4.74449e-10	5.92224e-08	0.448967	0.0799579	0.322383
ENSMUSG00000026558	80914	Uck2	-0.952429	5.1815e-10	6.36083e-08	-0.358424	0.093981	0.343782
ENSMUSG00000026728	22352	Vim	-0.734909	6.39801e-10	7.72651e-08	-0.600309	0.00203723	0.0613868
ENSMUSG00000079465	12828	Col4a3	-0.809274	8.51449e-10	1.00376e-07	-0.121018	0.507062	0.721739
ENSMUSG00000042851	78751	Zc3h6	0.865088	8.45446e-10	1.00376e-07	0.0264356	0.907784	0.958425
ENSMUSG00000030703	68616	Gdpd3	0.740492	8.81188e-10	1.03064e-07	0.557172	0.0141849	0.159913
ENSMUSG00000031486	78560	Gpr124	-0.759576	9.29114e-10	1.07821e-07	-0.228843	0.360106	0.613411
ENSMUSG00000031448	234072	Adprhl1	-0.817041	9.56325e-10	1.10118e-07	-0.338898	0.129692	0.388301
ENSMUSG00000038668	14745	Lpar1	-0.751985	1.00898e-09	1.15288e-07	-0.561188	0.0035493	0.0838899
ENSMUSG00000035722	27403	Abca7	0.824258	1.03547e-09	1.16045e-07	0.481261	0.0509747	0.272052
ENSMUSG00000027004	20378	Frzb	-0.906717	1.03905e-09	1.16045e-07	0.0204651	0.931531	0.970542
ENSMUSG00000021991	12294	Cacna2d3	0.948759	1.03557e-09	1.16045e-07	-0.561693	0.00361792	0.0846546
ENSMUSG00000074207	11522	Adh1	-1.18916	1.09712e-09	1.20715e-07	-0.237082	0.37037	0.621625
ENSMUSG00000030536	29875	Iqgap1	-0.561543	1.09183e-09	1.20715e-07	-0.103108	0.55052	0.752457
ENSMUSG00000050295	17300	Foxc1	-1.03282	1.18577e-09	1.29511e-07	-0.848988	0.000555759	0.0267832
ENSMUSG00000071226	330409	Cecr2	0.938719	1.22115e-09	1.32401e-07	-0.148005	0.379102	0.629271
ENSMUSG00000039005	21898	Tlr4	-1.02431	1.2634e-09	1.35989e-07	-0.482239	0.0182347	0.177511
ENSMUSG00000002346	73095	Slc25a42	0.83542	1.36448e-09	1.45813e-07	0.298866	0.257178	0.523273
ENSMUSG00000001494	74499	Sost	-1.72359	1.43493e-09	1.52246e-07	0.972428	0.000418145	0.0217346
ENSMUSG00000050296	74591	Abca12	0.936045	1.52787e-09	1.57783e-07	0.994294	2.23e-09	6.92e-07
ENSMUSG00000030268	12035	Bcat1	-1.45993	1.5296e-09	1.57783e-07	0.0752357	0.797085	0.900977
ENSMUSG00000032177	18577	Pde4a	0.990507	1.51858e-09	1.57783e-07	0.599809	0.00355961	0.0839653
ENSMUSG00000089945	11641	Gm20459	-0.789192	1.52538e-09	1.57783e-07	#VALUE!	NA	NA
ENSMUSG00000038729	11641	Akap2	-0.789192	1.52538e-09	1.57783e-07	0.127846	0.603316	NA
ENSMUSG00000029685	78910	Asb15	1.07573	1.56476e-09	1.60296e-07	-0.3275	0.105655	0.35971
ENSMUSG00000004891	18008	Nes	-0.932108	1.82277e-09	1.85448e-07	-0.0507128	0.800327	0.902802
ENSMUSG00000000058	12390	Cav2	-0.873515	1.89533e-09	1.91518e-07	-0.479219	0.0543547	0.280021
ENSMUSG00000040265	103967	Dnm3	1.05525	1.95588e-09	1.96301e-07	0.293948	0.217136	0.484886
ENSMUSG00000044042	14260	Fmn1	0.800049	2.06045e-09	2.05409e-07	0.0667347	0.762371	0.882981
ENSMUSG00000017969	19223	Ptgis	-0.848073	2.13721e-09	2.1164e-07	-0.365026	0.11335	0.369141
ENSMUSG00000015932	56431	Dstn	-0.754467	2.2281e-09	2.1918e-07	-0.243855	0.163854	0.430595
ENSMUSG00000024084	70536	Qpct	-1.08921	2.24472e-09	2.19362e-07	-0.218643	0.40596	0.649626
ENSMUSG00000036256	29817	Igfbp7	-0.72388	2.37258e-09	2.30342e-07	0.33283	0.132614	0.392209
ENSMUSG00000085272	381835	Gm1078	0.644254	2.67174e-09	2.56039e-07	-0.0378465	0.838523	0.923478
ENSMUSG00000024395	225341	Lims2	-0.87968	2.74998e-09	2.61848e-07	0.409352	0.065484	0.299929
ENSMUSG00000045930	66864	Clec14a	-0.72725	2.99345e-09	2.83214e-07	-0.399851	0.0857385	0.331167
ENSMUSG00000058672	22151	Tubb2a	-1.017	3.31971e-09	3.10132e-07	-0.239987	0.187002	0.455183
ENSMUSG00000024087	13078	Cyp1b1	-1.06494	3.38054e-09	3.1384e-07	-0.772149	0.000392379	0.020542
ENSMUSG00000046841	216197	Ckap4	-0.900709	3.65898e-09	3.3758e-07	0.0398695	0.814864	0.911755
ENSMUSG00000090799	546611	Klhl33	0.932438	3.7516e-09	3.43989e-07	0.497363	0.0961311	0.346625
ENSMUSG00000036052	56323	Dnajb5	-0.943276	3.82446e-09	3.4705e-07	0.0921134	0.707311	0.849357
ENSMUSG00000050505	219257	Pcdh20	-1.35593	3.8317e-09	3.4705e-07	-0.469504	0.0643633	0.297796
ENSMUSG00000050211	329502	Pla2g4e	0.744325	4.04539e-09	3.64183e-07	0.786982	8.35e-05	0.00610769
ENSMUSG00000061535	109323	C1qtnf7	-0.739946	4.47994e-09	4.00874e-07	-0.438523	0.0384546	0.241399
ENSMUSG00000027712	11747	Anxa5	-0.627145	4.54227e-09	4.04017e-07	-0.295429	0.0151419	0.163886
ENSMUSG00000027381	12125	Bcl2l11	0.74887	4.73005e-09	4.15741e-07	-0.196464	0.202424	0.47349
ENSMUSG00000021701	20620	Plk2	-0.746004	4.72129e-09	4.15741e-07	-0.482385	0.0729756	0.312562
ENSMUSG00000037996	76376	Slc24a2	1.0086	5.1633e-09	4.51151e-07	0.577155	0.00853982	0.126955
ENSMUSG00000091402	217874	BC048943	1.30638	5.27791e-09	4.58469e-07	0.142318	0.539479	0.743937
ENSMUSG00000035783	11475	Acta2	-1.64233	5.44837e-09	4.70524e-07	-0.081784	0.782582	0.894081
ENSMUSG00000056201	12631	Cfl1	-0.657637	5.73672e-09	4.92562e-07	0.527551	0.0166038	0.171397
ENSMUSG00000006800	72043	Sulf2	-0.636407	5.89325e-09	5.03094e-07	0.176703	0.233724	0.501302
ENSMUSG00000029201	22235	Ugdh	-0.697756	6.03464e-09	5.1222e-07	-0.475732	0.0112381	0.144105
ENSMUSG00000022456	24050	37865	1.09811	6.33498e-09	5.34658e-07	0.379766	0.0812239	0.324494
ENSMUSG00000047878	239559	A4galt	-0.829391	6.42024e-09	5.38792e-07	0.19247	0.50572	0.721104
ENSMUSG00000023036	93724	Pcdhga9	0.78396	7.22596e-09	6.03002e-07	0.312551	0.0847048	0.328745
ENSMUSG00000015944	80909	Gatsl2	0.790403	7.29004e-09	6.04951e-07	0.0826274	0.649759	0.815902
ENSMUSG00000018927	20305	Ccl6	-1.14857	8.00454e-09	6.60552e-07	-0.97407	1.05e-05	0.00115196
ENSMUSG00000029597	231691	Sds	0.765199	8.11133e-09	6.65667e-07	0.384209	0.174063	0.44048
ENSMUSG00000028906	269587	Epb4.1	0.608113	1.0283e-08	8.39248e-07	0.450248	0.00549289	0.102623
ENSMUSG00000037664	12577	Cdkn1c	-0.796656	1.04574e-08	8.4882e-07	-0.447596	0.0167888	0.171998
ENSMUSG00000024048	67268	Myl12a	-0.853012	1.07961e-08	8.66842e-07	-0.547775	0.00538272	0.102164
ENSMUSG00000002602	26362	Axl	-0.805371	1.07897e-08	8.66842e-07	-0.435482	0.0549207	0.281251
ENSMUSG00000058587	50875	Tmod3	-0.725734	1.09409e-08	8.73744e-07	-0.417706	0.0412372	0.247792
ENSMUSG00000063239	268934	Grm4	1.58509	1.21017e-08	9.61276e-07	-0.315704	0.153065	NA
ENSMUSG00000020009	15979	Ifngr1	-0.704049	1.23511e-08	9.75865e-07	-0.225349	0.127814	0.386094
ENSMUSG00000025780	209378	Itih5	-0.738157	1.35707e-08	1.06656e-06	-0.130724	0.587165	0.776062
ENSMUSG00000051098	72852	Mblac2	1.05047	1.41966e-08	1.10987e-06	-0.340816	0.166904	0.433461
ENSMUSG00000026879	227753	Gsn	-0.897339	1.49777e-08	1.16481e-06	0.0463884	0.820429	0.914657
ENSMUSG00000025492	66141	Ifitm3	-0.71843	1.51565e-08	1.17257e-06	0.243453	0.301065	0.559994
ENSMUSG00000020027	216233	Socs2	-0.72848	1.73044e-08	1.33181e-06	-0.177156	0.401704	0.646726
ENSMUSG00000001119	12833	Col6a1	-0.830966	1.74601e-08	1.33686e-06	0.139575	0.510991	0.724991
ENSMUSG00000028476	53614	Reck	-0.74877	1.83705e-08	1.38725e-06	-0.372722	0.112051	0.367462
ENSMUSG00000036181	50708	Hist1h1c	0.752538	1.83983e-08	1.38725e-06	-0.44215	0.0131725	0.154208
ENSMUSG00000004939	69564	Itgb1bp3	-1.10019	1.85198e-08	1.38936e-06	0.179803	0.453276	0.683672
ENSMUSG00000017631	109934	Abr	0.547779	1.98396e-08	1.48089e-06	0.29279	0.0835294	0.327414
ENSMUSG00000034245	232232	Hdac11	0.805826	1.99518e-08	1.48182e-06	0.286689	0.213009	0.480655
ENSMUSG00000024617	12322	Camk2a	0.81678	2.04098e-08	1.5083e-06	0.210589	0.178235	0.444344
ENSMUSG00000040003	50791	Magi2	0.802379	2.06401e-08	1.51776e-06	0.0341963	0.858328	0.933013
ENSMUSG00000020571	71853	Pdia6	-0.649613	2.13447e-08	1.56184e-06	0.158909	0.138697	0.400198
ENSMUSG00000026564	240892	Dusp27	-0.732907	2.21206e-08	1.61068e-06	0.504977	0.039473	0.242681
ENSMUSG00000031673	12552	Cdh11	-0.756996	2.31403e-08	1.67671e-06	-0.568045	0.0149551	0.16349
ENSMUSG00000029095	231148	Ablim2	0.95485	2.36001e-08	1.70173e-06	0.95342	6.89e-06	0.000814994
ENSMUSG00000050931	74442	Sgms2	-1.077	2.43867e-08	1.74995e-06	-0.508726	0.0221945	0.194707
ENSMUSG00000069763	67888	Tmem100	-1.22107	2.50516e-08	1.78902e-06	-0.879664	1.25e-06	0.000192119
ENSMUSG00000022037	12759	Clu	0.559104	2.5949e-08	1.84424e-06	-0.410934	0.0565241	0.285049
ENSMUSG00000048126	12835	Col6a3	-0.919356	2.67433e-08	1.89165e-06	0.192096	0.39981	0.645071
ENSMUSG00000054966	74071	Ifltd1	1.47972	2.82464e-08	1.98849e-06	0.318399	0.104375	0.358521
ENSMUSG00000027293	98878	Ehd4	-0.517605	2.84296e-08	1.99195e-06	0.327715	0.0374014	0.238015
ENSMUSG00000027797	13175	Dclk1	-0.834599	2.87261e-08	2.00328e-06	-0.485223	0.0293256	0.216461
ENSMUSG00000037206	26968	Islr	-0.830521	2.97439e-08	2.06456e-06	0.0767675	0.770126	0.887514
ENSMUSG00000019929	13179	Dcn	-0.756689	3.01292e-08	2.08158e-06	-0.479689	0.0332698	0.22615
ENSMUSG00000001870	268977	Ltbp1	-0.645982	3.0932e-08	2.12715e-06	-0.478333	0.013383	0.155821
ENSMUSG00000062929	12632	Cfl2	-0.720783	3.27915e-08	2.24463e-06	-0.339667	0.0934221	0.34283
ENSMUSG00000013698	18611	Pea15a	-0.545167	3.30267e-08	2.25036e-06	0.407711	0.0179966	0.177408
ENSMUSG00000001604	21401	Tcea3	0.684029	3.4591e-08	2.33552e-06	0.104835	0.60994	0.791866
ENSMUSG00000029581	14086	Fscn1	-0.91721	3.4904e-08	2.34599e-06	0.30173	0.25179	0.519131
ENSMUSG00000004698	79221	Hdac9	0.707837	3.51993e-08	2.35518e-06	-0.392881	0.0842635	0.327994
ENSMUSG00000004665	12798	Cnn2	-0.878934	3.62931e-08	2.41748e-06	0.112882	0.542614	0.7465
ENSMUSG00000030317	110595	Timp4	-0.890449	3.70294e-08	2.4446e-06	0.350061	0.127384	0.385557
ENSMUSG00000031097	21953	Tnni2	-0.966248	3.69949e-08	2.4446e-06	1.85118	3.77e-11	1.71e-08
ENSMUSG00000002028	214162	Mll1	0.672384	3.7567e-08	2.45835e-06	-0.0949204	0.648354	0.815147
ENSMUSG00000027800	17112	Tm4sf1	-0.891935	3.75687e-08	2.45835e-06	-0.459536	0.00845612	0.126097
ENSMUSG00000035049	107094	Rrp12	-0.905998	4.11426e-08	2.68041e-06	0.238836	0.369384	0.621074
ENSMUSG00000027962	22329	Vcam1	-1.10627	4.17609e-08	2.70881e-06	-0.30137	0.152758	0.418373
ENSMUSG00000020814	67622	Mxra7	-0.732808	4.52145e-08	2.92007e-06	0.0480489	0.817125	0.912739
ENSMUSG00000042675	66090	Ypel3	0.623775	4.68384e-08	3.01185e-06	0.362192	0.122268	0.378405
ENSMUSG00000026478	226519	Lamc1	-0.748981	4.96129e-08	3.17651e-06	-0.140286	0.490546	0.709441
ENSMUSG00000025665	67071	Rps6ka6	1.20356	5.06221e-08	3.21893e-06	-2.86931	3.94e-36	1.43e-32
ENSMUSG00000051067	237403	Lingo3	1.18524	5.07089e-08	3.21893e-06	0.27661	0.339897	0.595433
ENSMUSG00000027808	28146	Serp1	-0.739833	5.14852e-08	3.2543e-06	-0.503086	0.0180204	0.177408
ENSMUSG00000061436	15258	Hipk2	0.736933	5.21953e-08	3.27212e-06	-0.0779806	0.642855	0.811563
ENSMUSG00000037826	243382	Ppm1k	0.725765	5.22076e-08	3.27212e-06	-0.00301202	0.987979	0.994814
ENSMUSG00000026527	24012	Rgs7	-0.74705	5.32641e-08	3.32431e-06	0.396464	0.0420929	0.251279
ENSMUSG00000026479	16782	Lamc2	-0.979402	5.5309e-08	3.43749e-06	-0.919735	0.000285476	0.0161666
ENSMUSG00000025409	110962	Mbd6	0.9199	5.67257e-08	3.51085e-06	0.397383	0.161599	0.428221
ENSMUSG00000036862	233651	Dchs1	-0.831649	5.92325e-08	3.65079e-06	0.349229	0.161483	0.428138
ENSMUSG00000028444	12804	Cntfr	0.822842	6.40376e-08	3.93064e-06	-0.240335	0.31774	0.574584
ENSMUSG00000027750	50706	Postn	-0.879898	6.44761e-08	3.94126e-06	-0.559825	0.030681	0.220588
ENSMUSG00000001473	67951	Tubb6	-0.850061	6.50895e-08	3.96246e-06	-0.186479	0.253963	0.521029
ENSMUSG00000047658	545276	Gal3st3	1.15998	7.38961e-08	4.48022e-06	-0.0375008	0.897388	NA
ENSMUSG00000022122	13618	Ednrb	-0.637092	7.5573e-08	4.56326e-06	-0.581978	0.00195278	0.0603274
ENSMUSG00000036053	71409	Fmnl2	-0.721413	7.91981e-08	4.74358e-06	-0.393458	0.0504804	0.270622
ENSMUSG00000020695	17534	Mrc2	-0.725264	7.89617e-08	4.74358e-06	0.0984682	0.695883	0.843569
ENSMUSG00000028385	209131	Snx30	-0.630871	8.18773e-08	4.88436e-06	0.0885652	0.609579	0.791631
ENSMUSG00000015143	109711	Actn1	-0.763863	8.37542e-08	4.96224e-06	-0.450048	0.018917	0.180912
ENSMUSG00000048332	108927	Lhfp	-0.617022	8.38509e-08	4.96224e-06	-0.212292	0.227087	0.495135
ENSMUSG00000026415	64435	Fcamr	0.680761	8.55986e-08	5.02896e-06	0.793609	0.00131593	0.0471724
ENSMUSG00000032290	56294	Ptpn9	-0.709512	8.56556e-08	5.02896e-06	-0.00619955	0.972163	0.988971
ENSMUSG00000046182	269994	Gsg1l	1.14607	8.73476e-08	5.10812e-06	1.54833	1.26e-08	3.22e-06
ENSMUSG00000024085	17158	Man2a1	-0.859743	8.97443e-08	5.22769e-06	-0.561619	0.00509842	0.0994924
ENSMUSG00000044770	268297	Scml4	-0.971326	9.09455e-08	5.27697e-06	-0.415689	0.0868559	0.333184
ENSMUSG00000002900	16777	Lamb1	-0.678928	9.26169e-08	5.35304e-06	-0.109107	0.503178	0.718882
ENSMUSG00000029019	18158	Nppb	-1.4667	9.35226e-08	5.38444e-06	-0.316093	0.216683	0.484489
ENSMUSG00000040605	56175	Bace2	-0.904837	9.46751e-08	5.42974e-06	-0.471539	0.0151499	0.163886
ENSMUSG00000024754	83921	Tmem2	-0.990101	9.8312e-08	5.61664e-06	-0.264371	0.180922	0.44766
ENSMUSG00000027375	17153	Mal	-1.12587	1.01269e-07	5.76342e-06	-0.791793	0.000197115	0.0128072
ENSMUSG00000006386	21687	Tek	-0.56522	1.12472e-07	6.37653e-06	-0.537996	0.000687544	0.0306948
ENSMUSG00000001525	22154	Tubb5	-0.817036	1.16616e-07	6.58638e-06	-0.00346444	0.982637	0.993571
ENSMUSG00000020048	22027	Hsp90b1	-0.609885	1.2069e-07	6.79066e-06	-0.203395	0.0923971	0.341047
ENSMUSG00000057440	75739	Mpp7	-0.825391	1.22138e-07	6.84618e-06	-0.336517	0.0908103	0.338625
ENSMUSG00000040820	110948	Hlcs	0.697085	1.29104e-07	7.20945e-06	-0.199535	0.322057	0.578723
ENSMUSG00000044006	68709	Cilp2	-0.653776	1.36271e-07	7.58118e-06	1.41965	1.47e-08	3.63e-06
ENSMUSG00000057751	230971	Megf6	-0.856955	1.49146e-07	8.26646e-06	-0.255871	0.258205	0.524272
ENSMUSG00000048376	14062	F2r	-0.776398	1.54942e-07	8.52411e-06	-0.228378	0.224107	0.491584
ENSMUSG00000062329	231162	Cytl1	-0.932606	1.56525e-07	8.55746e-06	-0.862665	6.51e-05	0.00532019
ENSMUSG00000063558	11761	Aox1	0.654403	1.567e-07	8.55746e-06	0.0117596	0.95362	0.980305
ENSMUSG00000043456	243937	Zfp536	0.926954	1.61888e-07	8.77624e-06	-0.856624	2.84e-05	0.00269804
ENSMUSG00000026365	12628	Cfh	-0.711566	1.64995e-07	8.91215e-06	-0.541496	0.018257	0.177511
ENSMUSG00000034768	217217	Asb16	1.47461	1.66947e-07	8.98489e-06	0.14045	0.620276	0.798187
ENSMUSG00000020623	26399	Map2k6	0.861447	1.67613e-07	8.98819e-06	0.388424	0.0264782	0.209506
ENSMUSG00000025986	227059	Slc39a10	-0.699337	1.8065e-07	9.61784e-06	-0.309208	0.0988319	0.350231
ENSMUSG00000026670	107652	Uap1	-0.712468	1.80134e-07	9.61784e-06	-0.46418	0.0018116	0.0573841
ENSMUSG00000042804	100129	Gpr153	-0.809697	1.87953e-07	9.97093e-06	0.398439	0.0603822	0.291864
ENSMUSG00000024981	433256	Acsl5	-0.631376	1.90827e-07	1.00873e-05	-0.347258	0.134684	0.394642
ENSMUSG00000057530	230857	Ece1	-0.819883	2.01783e-07	1.06287e-05	-0.297447	0.0892082	0.336437
ENSMUSG00000018171	75909	Vmp1	-0.58499	2.02971e-07	1.06535e-05	0.609514	3.17e-06	0.000434443
ENSMUSG00000026463	381290	Atp2b4	-0.615802	2.05233e-07	1.07342e-05	-0.653926	0.00365866	0.0850609
ENSMUSG00000059588	54598	Calcrl	-0.792234	2.1274e-07	1.10879e-05	-0.403593	0.1099	0.36477
ENSMUSG00000026837	12831	Col5a1	-0.848384	2.14406e-07	1.11356e-05	0.127977	0.534185	0.740315
ENSMUSG00000070436	12406	Serpinh1	-0.764969	2.15313e-07	1.11438e-05	-0.213474	0.096585	0.347429
ENSMUSG00000034205	94352	Loxl2	-0.80839	2.16416e-07	1.1162e-05	-0.332883	0.0478347	0.26468
ENSMUSG00000025823	12304	Pdia4	-0.551413	2.20957e-07	1.13567e-05	0.0868152	0.570628	0.765571
ENSMUSG00000027868	21384	Tbx15	-1.47567	2.22246e-07	1.13836e-05	-0.638365	0.0316429	NA
ENSMUSG00000032420	23959	Nt5e	-0.737275	2.26295e-07	1.15512e-05	-0.678991	7.61e-05	0.00582225
ENSMUSG00000022523	14167	Fgf12	-0.68717	2.39931e-07	1.21636e-05	-0.27873	0.175516	0.441948
ENSMUSG00000021280	74190	1200009I06Rik	1.00659	2.46662e-07	1.24623e-05	0.692064	0.0196978	0.185076
ENSMUSG00000041949	272538	Tmco7	0.609271	2.48589e-07	1.25171e-05	0.369974	0.106704	0.361322
ENSMUSG00000024413	18145	Npc1	0.590607	2.51897e-07	1.26408e-05	0.0650397	0.721917	0.858467
ENSMUSG00000006442	20810	Srm	-0.867733	2.60623e-07	1.30347e-05	0.162561	0.545919	0.748621
ENSMUSG00000020926	11488	Adam11	0.840591	2.76157e-07	1.37192e-05	0.382729	0.105612	0.35971
ENSMUSG00000067780	94227	Pi15	-1.07266	2.7613e-07	1.37192e-05	-0.266186	0.278867	0.542236
ENSMUSG00000032698	16909	Lmo2	-0.572547	2.87515e-07	1.42358e-05	0.0725886	0.644248	0.812397
ENSMUSG00000001151	18541	Pcnt	0.549433	2.97615e-07	1.4687e-05	0.0613686	0.632772	0.806213
ENSMUSG00000037972	20621	Snn	0.532442	3.01905e-07	1.48493e-05	0.763349	0.000266352	0.0154442
ENSMUSG00000026062	226999	Slc9a2	0.697674	3.1859e-07	1.56183e-05	0.563958	0.00221256	0.064356
ENSMUSG00000068740	53883	Celsr2	0.872954	3.63936e-07	1.77826e-05	-0.274671	0.289616	0.55091
ENSMUSG00000032014	102644	Oaf	-0.850028	3.75303e-07	1.82779e-05	0.0239852	0.92772	0.968185
ENSMUSG00000040339	329739	Fam102b	-0.679449	3.94433e-07	1.91468e-05	-0.319131	0.0506812	0.271082
ENSMUSG00000031659	11513	Adcy7	-0.721791	4.3635e-07	2.1044e-05	-0.0455042	0.824293	0.916483
ENSMUSG00000027351	114715	Spred1	-0.692487	4.38936e-07	2.11002e-05	-0.00137563	0.99491	0.997619
ENSMUSG00000023036	93723	Pcdhga9	0.794526	4.46088e-07	2.13748e-05	0.312551	0.0847048	0.328745
ENSMUSG00000028348	68016	Murc	-0.68633	4.55233e-07	2.16844e-05	-0.237478	0.219997	0.488101
ENSMUSG00000006014	96875	Prg4	1.16556	4.55468e-07	2.16844e-05	-0.431066	0.11774	0.373983
ENSMUSG00000002504	65962	Slc9a3r2	-0.890576	4.57435e-07	2.17085e-05	-0.179333	0.317377	0.574372
ENSMUSG00000017144	74194	Rnd3	-0.661807	4.89131e-07	2.31387e-05	-0.151789	0.369031	0.620552
ENSMUSG00000059854	244653	Hydin	-1.27692	4.95041e-07	2.33439e-05	2.03312	3.11e-22	4.52e-19
ENSMUSG00000021256	238328	Vash1	-0.689018	5.00164e-07	2.34392e-05	0.257692	0.327271	0.584072
ENSMUSG00000021877	11843	Arf4	-0.66177	5.00217e-07	2.34392e-05	-0.422431	0.0231808	0.197966
ENSMUSG00000029661	12843	Col1a2	-0.813103	5.08278e-07	2.3742e-05	-0.0675029	0.726787	0.861431
ENSMUSG00000019960	67603	Dusp6	-0.960965	5.24045e-07	2.44018e-05	-0.054731	0.762935	0.883256
ENSMUSG00000063455	330286	D630045J12Rik	1.08294	5.4233e-07	2.50179e-05	-0.299284	0.265413	0.530059
ENSMUSG00000025701	11689	Alox5	-0.832722	5.44081e-07	2.5021e-05	-0.445076	0.0491337	0.267724
ENSMUSG00000022367	15117	Has2	-0.980981	5.6539e-07	2.59207e-05	-0.499523	0.0533723	0.277719
ENSMUSG00000022462	67760	Slc38a2	-0.955356	5.90188e-07	2.69743e-05	-0.644805	0.00355065	0.0838899
ENSMUSG00000026495	68226	Efcab2	0.640732	6.00597e-07	2.73658e-05	-0.319715	0.0609171	0.292236
ENSMUSG00000028633	51797	Ctps	-0.618053	6.21142e-07	2.82077e-05	-0.44572	0.00860313	0.127194
ENSMUSG00000034898	70598	Filip1	-0.542662	6.22872e-07	2.82077e-05	-0.113531	0.511536	0.725438
ENSMUSG00000038400	65112	Pmepa1	-0.772478	6.34411e-07	2.8643e-05	-0.139095	0.563359	0.761647
ENSMUSG00000042190	14747	Cmklr1	-1.00129	6.53573e-07	2.94187e-05	0.103531	0.663852	0.825081
ENSMUSG00000062275	382106	Fbxw24	-0.948769	6.55715e-07	2.94259e-05	0.173093	0.399539	0.644882
ENSMUSG00000025647	66940	Shisa5	-0.661269	6.73359e-07	3.01267e-05	-0.104916	0.641843	0.811166
ENSMUSG00000025227	75146	Tmem180	1.28348	7.07164e-07	3.14498e-05	-0.313113	0.224944	NA
ENSMUSG00000022099	13829	Epb4.9	-0.8803	7.07052e-07	3.14498e-05	0.0369336	0.898812	0.954492
ENSMUSG00000020241	12834	Col6a2	-0.736234	7.10116e-07	3.14867e-05	0.278981	0.152914	0.418443
ENSMUSG00000020142	55963	Slc1a4	-0.820514	7.17013e-07	3.16979e-05	0.0393957	0.863759	0.935562
ENSMUSG00000075254	77446	Heg1	-0.629488	7.24415e-07	3.18214e-05	-0.505206	0.0125035	0.15152
ENSMUSG00000007030	27762	D17H6S56E-3	0.780123	7.26232e-07	3.18214e-05	0.285894	0.259922	0.525601
ENSMUSG00000021390	18295	Ogn	-0.851057	7.22585e-07	3.18214e-05	-0.0914683	0.686154	0.837354
ENSMUSG00000026864	14828	Hspa5	-0.536757	7.84835e-07	3.40875e-05	0.0109909	0.927468	0.968185
ENSMUSG00000047298	240595	Kcnv2	0.813478	7.84073e-07	3.40875e-05	-0.83728	1.86e-05	0.0018968
ENSMUSG00000031740	17390	Mmp2	-0.656306	7.87849e-07	3.41187e-05	0.335313	0.160281	0.427946
ENSMUSG00000019810	66848	Fuca2	-0.624816	7.93948e-07	3.42829e-05	-1.03801	1.03e-10	4.03e-08
ENSMUSG00000091712	665119	Sec14l5	0.994248	8.10216e-07	3.48839e-05	0.746923	0.0126389	0.152341
ENSMUSG00000030217	109978	Art4	-0.937941	8.17495e-07	3.50956e-05	-0.0548245	0.790806	0.897628
ENSMUSG00000035493	21810	Tgfbi	-0.689545	8.48088e-07	3.6304e-05	-0.0723107	0.720949	0.858158
ENSMUSG00000042215	213539	Bag2	-0.604647	8.82478e-07	3.76676e-05	-0.343054	0.109631	0.364409
ENSMUSG00000006941	68969	Eif1b	0.582258	8.94341e-07	3.7988e-05	0.34087	0.0364032	0.234949
ENSMUSG00000074364	259300	Ehd2	-0.614368	8.951e-07	3.7988e-05	0.0320069	0.866803	0.936654
ENSMUSG00000025026	27360	Add3	-0.435444	9.48448e-07	4.01375e-05	-0.144039	0.428702	0.665955
ENSMUSG00000043067	244745	Dpy19l1	-0.621555	9.53521e-07	4.02375e-05	-0.339768	0.0589346	0.28901
ENSMUSG00000020333	216739	Acsl6	0.650233	9.65154e-07	4.0613e-05	0.149869	0.467531	0.694324
ENSMUSG00000031377	12169	Bmx	-0.746718	9.69259e-07	4.06705e-05	-0.374966	0.0809945	0.323879
ENSMUSG00000038260	68667	Trpm4	0.652004	1.01591e-06	4.24583e-05	0.0989433	0.704606	0.848402
ENSMUSG00000035296	24053	Sgcg	0.468919	1.01758e-06	4.24583e-05	-0.00287529	0.986704	0.994458
ENSMUSG00000056220	18783	Pla2g4a	-0.877013	1.04418e-06	4.33248e-05	-0.610852	0.0025788	0.0702345
ENSMUSG00000031840	19339	Rab3a	0.554036	1.05666e-06	4.37204e-05	0.404196	0.0117939	0.147558
ENSMUSG00000001833	235072	39326	-0.710061	1.05998e-06	4.37359e-05	-0.237033	0.278805	0.542186
ENSMUSG00000033249	26386	Hsf4	0.99034	1.06361e-06	4.37641e-05	0.239376	0.342697	NA
ENSMUSG00000020674	69675	Pxdn	-0.516065	1.07267e-06	4.40149e-05	0.234823	0.0954109	0.346287
ENSMUSG00000034120	20382	Srsf2	-0.504025	1.11199e-06	4.55028e-05	-0.100645	0.589603	0.777921
ENSMUSG00000093603	20382	Srsf2	-0.504025	1.11199e-06	4.55028e-05	#N/A	#N/A	#N/A
ENSMUSG00000052854	27206	Nrk	-0.980056	1.11952e-06	4.56852e-05	-0.461992	0.0510769	0.272198
ENSMUSG00000046480	399548	Scn4b	0.668593	1.1351e-06	4.61941e-05	-0.547058	0.00145287	0.0504491
ENSMUSG00000019769	64009	Syne1	0.561918	1.14701e-06	4.65509e-05	#N/A	#N/A	#N/A
ENSMUSG00000075324	60344	Fign	0.821251	1.17279e-06	4.74675e-05	-0.103464	0.612552	0.793045
ENSMUSG00000022752	28185	Tomm70a	-0.501522	1.19102e-06	4.76855e-05	-0.330004	0.076336	0.318034
ENSMUSG00000026276	18000	37500	-0.542631	1.1896e-06	4.76855e-05	-0.265635	0.170519	0.437309
ENSMUSG00000001123	16859	Lgals9	-0.793327	1.18222e-06	4.76855e-05	0.296168	0.229908	0.498003
ENSMUSG00000032011	21838	Thy1	-0.838764	1.18681e-06	4.76855e-05	0.0389423	0.879073	0.943504
ENSMUSG00000022528	15205	Hes1	-0.766753	1.20266e-06	4.80223e-05	-0.140212	0.556038	0.75667
ENSMUSG00000023913	27226	Pla2g7	-0.544367	1.23702e-06	4.92618e-05	-0.352152	0.0316134	0.222135
ENSMUSG00000029714	57330	Gigyf1	0.705853	1.2673e-06	5.03326e-05	0.0731293	0.71086	0.851792
ENSMUSG00000038370	66425	Pcp4l1	0.543886	1.27681e-06	5.05752e-05	0.386117	0.0836927	0.327436
ENSMUSG00000038456	209773	Dennd2a	-0.567554	1.29448e-06	5.11388e-05	0.388136	0.0674134	0.303381
ENSMUSG00000031618	110784	Nr3c2	0.631976	1.30584e-06	5.14327e-05	-0.213046	0.193581	0.462852
ENSMUSG00000031918	77116	Mtmr2	-0.576065	1.30884e-06	5.14327e-05	-0.119831	0.264029	0.529604
ENSMUSG00000015468	18132	Notch4	-0.881914	1.31912e-06	5.16999e-05	0.143758	0.565462	0.762931
ENSMUSG00000037406	330723	Htra4	-0.730269	1.3253e-06	5.18053e-05	-0.581981	0.0262231	0.209468
ENSMUSG00000039286	72007	Fndc3b	-0.620235	1.35674e-06	5.2895e-05	-0.292621	0.108289	0.362893
ENSMUSG00000029761	109624	Cald1	-0.634521	1.3939e-06	5.42017e-05	-0.48449	0.0152736	0.16466
ENSMUSG00000073600	381148	Gm1614	0.622119	1.40234e-06	5.43872e-05	0.285364	0.11669	0.372925
ENSMUSG00000056423	224065	Uts2d	-1.04235	1.45896e-06	5.64358e-05	-0.94852	2.56e-07	4.78e-05
ENSMUSG00000048473	330440	Gm766	-1.35913	1.47084e-06	5.66008e-05	-0.436017	0.0749284	0.315358
ENSMUSG00000030096	21366	Slc6a6	-0.583024	1.46711e-06	5.66008e-05	-0.425203	0.0623015	0.293818
ENSMUSG00000034522	380912	Zfp395	0.91388	1.52002e-06	5.8342e-05	0.395147	0.110292	0.365085
ENSMUSG00000026547	21346	Tagln2	-0.705042	1.55518e-06	5.95378e-05	0.0652384	0.771073	0.888202
ENSMUSG00000038384	208043	Setd1b	0.969283	1.56952e-06	5.99324e-05	-0.0478004	0.851036	0.929327
ENSMUSG00000045871	239250	Slitrk6	1.06768	1.64198e-06	6.23786e-05	0.483437	0.039781	0.243152
ENSMUSG00000022096	15460	Hr	-0.66578	1.63874e-06	6.23786e-05	0.104987	0.629472	0.803838
ENSMUSG00000034714	117160	Ttyh2	-0.85517	1.69352e-06	6.41723e-05	-0.199576	0.494875	0.712843
ENSMUSG00000073599	68545	Ecscr	-0.765428	1.70679e-06	6.45106e-05	0.0429466	0.866195	0.936577
ENSMUSG00000022868	11625	Ahsg	-1.32158	1.76083e-06	6.63841e-05	-0.196217	0.485103	0.706473
ENSMUSG00000079355	252837	Ccrl1	-0.929171	1.7746e-06	6.67341e-05	0.063441	0.803337	0.904095
ENSMUSG00000042359	99031	Osbpl6	0.616505	1.7844e-06	6.69332e-05	0.680081	6.48e-06	0.000778963
ENSMUSG00000032184	70082	Lysmd2	-0.650846	1.857e-06	6.94808e-05	-0.419803	0.0629775	0.295098
ENSMUSG00000002233	11853	Rhoc	-0.733341	1.8774e-06	7.00676e-05	0.23233	0.147824	0.412706
ENSMUSG00000026833	56177	Olfm1	0.461857	1.90077e-06	7.07619e-05	0.639387	4.4e-05	0.00387794
ENSMUSG00000028426	19359	Rad23b	-0.454156	1.94647e-06	7.22823e-05	-0.201584	0.247619	0.514982
ENSMUSG00000021109	15251	Hif1a	-0.565004	2.07694e-06	7.69347e-05	-0.424404	0.0276119	0.212618
ENSMUSG00000020435	74309	Osbp2	0.655977	2.09487e-06	7.7406e-05	0.0330792	0.859021	0.933139
ENSMUSG00000021759	19012	Ppap2a	-0.54745	2.19815e-06	8.06204e-05	-0.061005	0.71503	0.853708
ENSMUSG00000000142	12006	Axin2	0.844461	2.2164e-06	8.08903e-05	-0.223769	0.379989	0.629983
ENSMUSG00000031996	11804	Aplp2	-0.521639	2.21613e-06	8.08903e-05	-0.238832	0.056895	0.285929
ENSMUSG00000037253	240396	Mex3c	-0.595396	2.37361e-06	8.64155e-05	-0.249799	0.129101	0.38805
ENSMUSG00000039529	54670	Atp8b1	-0.712753	2.45123e-06	8.90234e-05	-0.533484	0.0152575	0.164609
ENSMUSG00000004791	18654	Pgf	-0.919676	2.50246e-06	9.05464e-05	0.00646979	0.982518	0.993571
ENSMUSG00000021913	239017	Ogdhl	-0.89275	2.50536e-06	9.05464e-05	0.298856	0.234816	0.50206
ENSMUSG00000025892	14802	Gria4	-1.33947	2.56394e-06	9.24389e-05	-0.508673	0.0823201	0.326276
ENSMUSG00000031714	14388	Gab1	0.503367	2.6957e-06	9.69539e-05	-0.287377	0.0471833	0.263114
ENSMUSG00000039852	68703	Rere	0.620686	2.77055e-06	9.94051e-05	-0.162608	0.446155	0.67841
ENSMUSG00000016494	12490	Cd34	-0.579766	2.80991e-06	0.000100575	-0.380652	0.0395453	0.242743
ENSMUSG00000024411	11829	Aqp4	0.717302	2.85798e-06	0.000101804	-2.12836	9.92e-20	1.11e-16
ENSMUSG00000004951	15507	Hspb1	-0.981723	2.85482e-06	0.000101804	-0.404342	0.140991	0.403855
ENSMUSG00000021638	18260	Ocln	-0.881918	2.90088e-06	0.000103085	-0.580474	0.0191976	0.182496
ENSMUSG00000022136	100037258	Dnajc3	-0.645126	2.94158e-06	0.000104282	-0.411464	0.0250596	0.206075
ENSMUSG00000031298	237175	Gpr64	-0.88708	2.98674e-06	0.000105631	-0.193699	0.424046	0.66292
ENSMUSG00000001918	20514	Slc1a5	-0.741043	2.9943e-06	0.000105647	-0.198892	0.448261	0.679759
ENSMUSG00000021678	14063	F2rl1	-1.26943	3.03608e-06	0.000106867	-0.145311	0.62647	0.801834
ENSMUSG00000057738	20740	Spna2	-0.537537	3.08567e-06	0.000108356	0.0325594	0.858825	0.933087
ENSMUSG00000031422	56397	Morf4l2	-0.496655	3.10849e-06	0.0001089	-0.285299	0.0538408	0.278861
ENSMUSG00000053931	71994	Cnn3	-0.688156	3.25698e-06	0.000113833	-0.22858	0.161369	0.428103
ENSMUSG00000026727	20163	Rsu1	-0.540736	3.2865e-06	0.000114596	-0.222259	0.144948	0.408708
ENSMUSG00000053334	231630	Ficd	0.629798	3.41511e-06	0.000118254	0.0414427	0.822806	0.915739
ENSMUSG00000044393	13511	Dsg2	0.620692	3.4153e-06	0.000118254	-0.274251	0.0915629	0.339793
ENSMUSG00000020075	56200	Ddx21	-0.520223	3.41223e-06	0.000118254	-0.306206	0.01604	0.169287
ENSMUSG00000033777	279572	Tlr13	-0.86523	3.70041e-06	0.000127828	-0.542502	0.0219686	0.194075
ENSMUSG00000050503	74165	Fbxl22	-0.872379	3.72122e-06	0.000128248	-0.111323	0.610145	0.791889
ENSMUSG00000005397	18073	Nid1	-0.81139	3.75858e-06	0.000129236	-0.289119	0.22117	0.489261
ENSMUSG00000046280	214547	She	-0.663142	3.77586e-06	0.00012953	-0.444466	0.00680323	0.113306
ENSMUSG00000053411	52609	Cbx7	0.58848	3.8678e-06	0.000131942	0.653848	0.0040424	0.0887378
ENSMUSG00000036902	74513	Neto2	-0.893543	3.86018e-06	0.000131942	1.49723	5.89e-11	2.52e-08
ENSMUSG00000045659	233765	Plekha7	0.561252	3.87281e-06	0.000131942	0.840642	8.26e-09	2.19e-06
ENSMUSG00000025404	71750	R3hdm2	0.653732	3.90179e-06	0.000132625	-0.0475229	0.789718	0.897066
ENSMUSG00000036528	19024	Ppfibp2	0.479501	3.96005e-06	0.000133992	0.498698	0.00776472	0.119838
ENSMUSG00000020599	19739	Rgs9	1.08836	4.00144e-06	0.000135085	0.499962	0.0695708	NA
ENSMUSG00000001029	15896	Icam2	-0.787497	4.05388e-06	0.000136545	-0.0521834	0.840739	0.923779
ENSMUSG00000036006	193385	Fam65b	-0.834317	4.09251e-06	0.000137534	-0.407654	0.0471245	0.263114
ENSMUSG00000032232	68178	Cgnl1	-0.698491	4.15035e-06	0.000139163	-0.330081	0.108949	0.363356
ENSMUSG00000022803	64082	Popdc2	-0.555804	4.1736e-06	0.000139628	0.698657	0.00162405	0.0539094
ENSMUSG00000057719	269016	Sh3rf2	0.830479	4.20774e-06	0.000140453	-0.658456	0.0117857	0.147558
ENSMUSG00000030757	210162	Zkscan2	1.04251	4.26225e-06	0.000141954	0.611574	0.0146384	0.162195
ENSMUSG00000003541	15937	Ier3	0.69878	4.27812e-06	0.000142164	0.175929	0.283056	0.545493
ENSMUSG00000020032	77976	Nuak1	-0.650314	4.39364e-06	0.000145677	-0.215003	0.237028	0.503989
ENSMUSG00000027200	214968	Sema6d	-0.469043	4.55353e-06	0.000150642	-0.178981	0.283675	0.545797
ENSMUSG00000039759	69876	Thap3	0.696436	4.65903e-06	0.000153789	0.216375	0.468264	0.694498
ENSMUSG00000037868	13654	Egr2	-1.28454	4.79972e-06	0.000158082	-0.120393	0.682493	0.835339
ENSMUSG00000079012	20717	Serpina3m	1.17187	4.9367e-06	0.000162234	0.236788	0.270062	NA
ENSMUSG00000019873	28193	Reep3	-0.65987	5.00815e-06	0.000164219	-0.343233	0.055634	0.283408
ENSMUSG00000029064	14688	Gnb1	-0.451064	5.21442e-06	0.000170606	-0.180799	0.19458	0.46402
ENSMUSG00000031906	58994	Smpd3	-0.866337	5.24045e-06	0.00017108	-0.36562	0.161122	0.427985
ENSMUSG00000044172	68509	Ptx4	-1.14887	5.3148e-06	0.000173127	-0.268948	0.305801	NA
ENSMUSG00000050222	239114	Il17d	-0.987533	5.36389e-06	0.000174344	-0.0603386	0.827422	0.917928
ENSMUSG00000039556	54646	Ppp1r3f	0.883159	5.4532e-06	0.00017686	0.608478	0.00987569	0.137148
ENSMUSG00000039087	68750	Rreb1	0.621449	5.53671e-06	0.000179177	0.102768	0.589032	0.777505
ENSMUSG00000001891	216558	Ugp2	-0.5706	5.70184e-06	0.000183757	-0.517336	0.00688424	0.113856
ENSMUSG00000037405	15894	Icam1	-0.745959	5.71534e-06	0.000183757	-0.342524	0.172522	0.438736
ENSMUSG00000031453	19414	Rasa3	-0.510859	5.7146e-06	0.000183757	0.21131	0.171616	0.438126
ENSMUSG00000031755	67378	Bbs2	0.553559	5.80242e-06	0.000185961	0.148776	0.334388	0.59033
ENSMUSG00000028152	56224	Tspan5	-0.704767	5.8392e-06	0.000186528	-0.438476	0.052156	0.274889
ENSMUSG00000001700	107022	Gramd3	-0.553738	6.03623e-06	0.000191996	0.0179586	0.920024	0.964144
ENSMUSG00000074785	54712	Plxnc1	-0.577148	6.05844e-06	0.000192291	-0.627377	0.00583974	0.106088
ENSMUSG00000026679	71233	Enkur	-0.832724	6.09826e-06	0.000193142	0.51768	0.0073659	0.117806
ENSMUSG00000034462	18764	Pkd2	-0.547832	6.62123e-06	0.000209259	-0.331259	0.0654923	0.299929
ENSMUSG00000062609	16516	Kcnj15	-1.18107	6.64927e-06	0.000209699	1.11901	7.97e-05	0.00594487
ENSMUSG00000021047	664883	Nova1	0.707006	6.78018e-06	0.000213375	0.226144	0.252585	0.519667
ENSMUSG00000024011	74116	Pi16	-0.605289	6.84777e-06	0.000215046	0.505386	0.040302	0.244704
ENSMUSG00000038776	13849	Ephx1	-0.64707	6.93313e-06	0.00021681	-0.148348	0.558608	0.758101
ENSMUSG00000032334	16949	Loxl1	-0.746961	7.14791e-06	0.000222589	-0.116745	0.548019	0.750457
ENSMUSG00000022324	17181	Matn2	-0.640821	7.2061e-06	0.000223932	0.129253	0.515871	0.728197
ENSMUSG00000028567	66073	Txndc12	-0.608623	7.24448e-06	0.000224432	0.137291	0.428846	0.666108
ENSMUSG00000032186	50876	Tmod2	-0.59922	7.25242e-06	0.000224432	-0.353955	0.0970873	0.348203
ENSMUSG00000031207	17698	Msn	-0.500424	7.36536e-06	0.000227453	-0.249206	0.0715508	0.31011
ENSMUSG00000025355	58223	Mmp19	-0.830756	7.51423e-06	0.000231569	-0.314514	0.13982	0.402171
ENSMUSG00000059408	80978	Mrgprh	0.73038	7.5882e-06	0.000233365	0.52927	0.0204402	0.188641
ENSMUSG00000028989	654812	Angptl7	-1.03047	7.66704e-06	0.000235302	-0.237901	0.384366	0.633889
ENSMUSG00000022443	17886	Myh9	-0.613592	7.8923e-06	0.000241716	0.0617788	0.721771	0.858433
ENSMUSG00000022199	59049	Slc22a17	0.698833	7.92554e-06	0.000242234	0.529176	0.055464	0.282939
ENSMUSG00000046598	71911	Bdh1	0.743584	7.95989e-06	0.000242785	-1.20538	1.55e-09	4.92e-07
ENSMUSG00000000001	14679	Gnai3	-0.535575	8.0163e-06	0.000244004	-0.405132	0.0119957	0.148711
ENSMUSG00000023826	50873	Park2	0.676538	8.04703e-06	0.000244439	-0.421798	0.0308632	0.220588
ENSMUSG00000005103	22388	Wdr1	-0.473542	8.19829e-06	0.000248525	0.0991875	0.60695	0.789556
ENSMUSG00000029163	100952	Emilin1	-0.769976	8.23028e-06	0.000248987	0.216156	0.429443	0.666323
ENSMUSG00000045092	13609	S1pr1	-0.805243	8.25765e-06	0.000249307	0.00952753	0.95711	0.981972
ENSMUSG00000037242	29876	Clic4	-0.464376	8.5969e-06	0.000259023	-0.450445	0.00221536	0.064356
ENSMUSG00000029484	11745	Anxa3	-0.88688	8.68377e-06	0.000261111	-0.451437	0.00484475	0.0961984
ENSMUSG00000038267	73102	Slc22a23	0.646388	8.77903e-06	0.000263442	0.507153	0.00406709	0.0889278
ENSMUSG00000049551	14371	Fzd9	1.09857	8.85967e-06	0.000265326	0.18625	0.509579	NA
ENSMUSG00000022951	54720	Rcan1	-0.70278	8.89336e-06	0.000265799	-0.392587	0.187395	0.455468
ENSMUSG00000055723	66922	Rras2	-0.618975	8.92263e-06	0.000266138	-0.327826	0.0440665	0.255618
ENSMUSG00000020154	19263	Ptprb	-0.717082	9.11038e-06	0.000271193	-0.124149	0.413414	0.655142
ENSMUSG00000039496	227526	Cdnf	0.571039	9.18253e-06	0.000272794	-0.157768	0.431389	0.667634
ENSMUSG00000046574	233210	Prr12	0.795071	9.23081e-06	0.000273443	-0.0396045	0.89234	0.951158
ENSMUSG00000054580	18779	Pla2r1	0.54148	9.24118e-06	0.000273443	-0.210701	0.126134	0.38419
ENSMUSG00000053963	381310	6330403A02Rik	0.765427	9.35819e-06	0.000275807	0.256207	0.275285	0.538145
ENSMUSG00000032202	11891	Rab27a	-0.726775	9.39098e-06	0.000276225	-0.422258	0.0228755	0.196535
ENSMUSG00000028776	94242	Tinagl1	-1.20432	9.43377e-06	0.000276935	-0.0454678	0.840248	0.923779
ENSMUSG00000042744	269700	Gm15800	0.572584	9.4608e-06	0.000277181	0.214623	0.272108	0.535316
ENSMUSG00000015850	229595	Adamtsl4	0.719298	9.75402e-06	0.000285209	0.231681	0.265651	0.530059
ENSMUSG00000035357	55983	Pdzrn3	-0.537072	9.84059e-06	0.000287175	-0.382561	0.0269	0.211242
ENSMUSG00000038128	12326	Camk4	-0.987781	9.90028e-06	0.000288351	-0.0538268	0.802481	0.90396
ENSMUSG00000021555	78689	Naa35	0.504345	1.03013e-05	0.000298566	-0.421126	0.00307803	0.0769719
ENSMUSG00000090841	17904	Myl6	-0.8308	1.03113e-05	0.000298566	0.401652	0.111715	0.366939
ENSMUSG00000030770	57342	Parva	-0.531364	1.02839e-05	0.000298566	-0.128563	0.403628	0.647605
ENSMUSG00000027931	18160	Npr1	-0.492527	1.03767e-05	0.000299874	0.172273	0.483453	0.705098
ENSMUSG00000041261	12319	Car8	-0.787587	1.04262e-05	0.000300721	-0.408314	0.0702911	0.308036
ENSMUSG00000048065	320635	Cyb5r2	0.741508	1.06305e-05	0.000305426	0.616018	0.00199574	0.0606389
ENSMUSG00000023055	67488	Calcoco1	0.559364	1.06616e-05	0.000305729	0.167867	0.404862	0.648367
ENSMUSG00000045761	320159	Fam179a	0.867505	1.0752e-05	0.000307136	0.169183	0.509234	0.723486
ENSMUSG00000030513	18553	Pcsk6	-0.526817	1.07486e-05	0.000307136	-0.0465535	0.838051	0.923176
ENSMUSG00000019814	353258	Ltv1	-0.571713	1.07916e-05	0.000307477	-0.11094	0.415606	0.656899
ENSMUSG00000022184	106052	Fbxo4	-0.620216	1.08054e-05	0.000307477	-0.167228	0.248676	0.515927
ENSMUSG00000042286	192187	Stab1	-0.561585	1.08985e-05	0.000309534	0.268735	0.228004	0.496166
ENSMUSG00000040990	58194	Sh3kbp1	-0.641653	1.10858e-05	0.000313057	0.0813928	0.639431	0.809845
ENSMUSG00000008475	67771	Arpc5	-0.621681	1.10709e-05	0.000313057	-0.338427	0.0330196	0.2256
ENSMUSG00000032988	57274	Slc16a8	1.03629	1.15361e-05	0.000323315	0.258431	0.347376	NA
ENSMUSG00000024935	20510	Slc1a1	-1.03519	1.1526e-05	0.000323315	0.603212	0.00793114	0.121182
ENSMUSG00000034868	67938	Myl12b	-0.534085	1.17233e-05	0.000327943	-0.0947852	0.470672	0.696155
ENSMUSG00000036446	17022	Lum	-0.765818	1.17801e-05	0.000328296	-0.199347	0.422109	0.661859
ENSMUSG00000003617	12870	Cp	-0.608071	1.17612e-05	0.000328296	-0.2064	0.205402	0.475612
ENSMUSG00000015843	20183	Rxrg	0.499662	1.19548e-05	0.00033254	-0.154502	0.500602	0.717263
ENSMUSG00000021025	18035	Nfkbia	-0.910278	1.21627e-05	0.000337692	-0.196955	0.190669	0.460122
ENSMUSG00000021750	268709	Fam107a	-1.20856	1.22694e-05	0.000340017	-0.548454	0.0277382	0.212867
ENSMUSG00000006699	12540	Cdc42	-0.506209	1.23885e-05	0.00034268	-0.148272	0.334549	0.590471
ENSMUSG00000037656	20516	Slc20a2	0.426366	1.26186e-05	0.000348396	-0.0787454	0.595756	0.781852
ENSMUSG00000030213	54343	Atf7ip	0.458405	1.28819e-05	0.000355005	0.125537	0.372355	0.623763
ENSMUSG00000034614	216505	Pik3ip1	0.667507	1.32368e-05	0.00036411	0.542914	0.000430735	0.0222302
ENSMUSG00000060594	244864	Layn	-0.707242	1.33785e-05	0.000367327	-0.483831	0.0382913	0.240835
ENSMUSG00000026509	12334	Capn2	-0.483675	1.34848e-05	0.000369563	-0.0226719	0.841734	0.924364
ENSMUSG00000038879	223473	Nipal2	-1.07556	1.35159e-05	0.000369732	-0.569283	0.0208885	0.189769
ENSMUSG00000047250	19224	Ptgs1	-0.739261	1.35488e-05	0.000369951	-0.555002	0.0140281	0.159372
ENSMUSG00000046223	18793	Plaur	-1.12756	1.36829e-05	0.000372927	-0.256941	0.385322	NA
ENSMUSG00000042793	329252	Lgr6	0.505463	1.37915e-05	0.000375198	-0.414753	0.00964904	0.135422
ENSMUSG00000045312	218454	Lhfpl2	-0.800297	1.39239e-05	0.00037811	0.0849037	0.722561	0.858882
ENSMUSG00000020484	22433	Xbp1	-0.457378	1.40788e-05	0.000381294	-0.0223715	0.840656	0.923779
ENSMUSG00000040860	230872	Crocc	0.8039	1.41182e-05	0.000381294	-0.26648	0.364587	0.616784
ENSMUSG00000079419	73656	Ms4a6c	-0.86569	1.41764e-05	0.00038217	-0.402402	0.0747425	0.315043
ENSMUSG00000022246	75646	Rai14	-0.761746	1.4487e-05	0.000389836	-0.607579	0.00260941	0.0702345
ENSMUSG00000054252	14184	Fgfr3	-0.819119	1.48495e-05	0.000398813	0.0299869	0.911101	0.95963
ENSMUSG00000001175	12313	Calm1	-0.446006	1.48832e-05	0.000398813	-0.184788	0.128899	0.387778
ENSMUSG00000030265	16653	Kras	-0.553356	1.49046e-05	0.000398813	-0.444149	0.0185278	0.178697
ENSMUSG00000000530	11482	Acvrl1	-0.602058	1.49548e-05	0.000398813	0.245316	0.319445	0.576412
ENSMUSG00000036438	12313	Calm2	-0.446006	1.48832e-05	0.000398813	-0.291956	0.024578	0.204055
ENSMUSG00000073096	243371	Lrrc61	0.696141	1.49533e-05	0.000398813	0.00197851	0.993868	0.997363
ENSMUSG00000019370	12313	Calm3	-0.446006	1.48832e-05	0.000398813	0.377376	0.0684296	0.305175
ENSMUSG00000041329	11932	Atp1b2	0.819409	1.5147e-05	0.000403213	0.140694	0.623932	0.800556
ENSMUSG00000090231	14962	Cfb	0.947403	1.52274e-05	0.000404629	-0.0665458	0.718629	NA
ENSMUSG00000093620	14962	CT025759.1	0.947403	1.52274e-05	0.000404629	#N/A	#N/A	#N/A
ENSMUSG00000035944	239570	Ttc38	0.455844	1.53735e-05	0.000407782	0.186248	0.328596	0.585274
ENSMUSG00000030091	54563	Nup210	0.659207	1.54125e-05	0.000408087	-0.0820801	0.760248	0.881556
ENSMUSG00000053199	244867	Arhgap20	0.565167	1.60383e-05	0.000423902	-0.251269	0.15286	0.418443
ENSMUSG00000014776	78688	Nol3	0.668879	1.61072e-05	0.000424967	0.612873	0.0131506	0.154208
ENSMUSG00000025935	72265	Tram1	-0.53775	1.62705e-05	0.000428515	-0.417029	0.0344318	0.229335
ENSMUSG00000040998	114249	Npnt	-1.08992	1.66119e-05	0.000436699	-0.356514	0.155705	0.422166
ENSMUSG00000040312	240084	Cchcr1	0.886708	1.66401e-05	0.000436699	0.122583	0.656798	0.820659
ENSMUSG00000020349	19052	Ppp2ca	-0.539144	1.67165e-05	0.000437932	-0.220179	0.122135	0.378203
ENSMUSG00000068196	12837	Col8a1	-0.850987	1.68527e-05	0.000440721	0.265565	0.321857	0.578524
ENSMUSG00000038007	230379	Acer2	-0.847681	1.69041e-05	0.000441289	-0.311921	0.113165	0.368994
ENSMUSG00000021943	14560	Gdf10	-1.0864	1.70004e-05	0.000443023	-0.0764008	0.796665	0.900906
ENSMUSG00000022856	66664	Tmem41a	0.649041	1.73621e-05	0.000451659	0.217546	0.415773	0.656966
ENSMUSG00000030342	12527	Cd9	-0.760951	1.74887e-05	0.000454155	-0.495414	0.0271433	0.211709
ENSMUSG00000040260	76441	Daam2	0.650568	1.82933e-05	0.00047422	0.548	0.019067	0.181848
ENSMUSG00000027074	58207	Slc43a3	-0.643537	1.83755e-05	0.000475521	-0.238815	0.255089	0.521462
ENSMUSG00000050587	241568	Lrrc4c	0.873821	1.84612e-05	0.000476908	-0.162264	0.455933	0.685765
ENSMUSG00000033453	235130	Adamts15	-0.858485	1.85014e-05	0.000477115	0.402849	0.0862067	0.332007
ENSMUSG00000027533	16592	Fabp5	-1.10576	1.85334e-05	0.000477115	-0.589126	0.00542277	0.102456
ENSMUSG00000032116	16430	Stt3a	-0.479256	1.86213e-05	0.000478548	-0.23501	0.11569	0.371725
ENSMUSG00000058396	11536	Gpr182	-0.89381	1.88615e-05	0.000483885	-0.480755	0.0591424	0.289525
ENSMUSG00000025221	80906	Kcnip2	-0.789688	1.91187e-05	0.000489222	0.460762	0.0577569	0.287419
ENSMUSG00000039745	53415	Htatip2	0.700532	1.91675e-05	0.000489222	0.343126	0.129773	0.388384
ENSMUSG00000020919	20851	Stat5b	0.47484	1.93744e-05	0.000493631	0.109463	0.496545	0.714244
ENSMUSG00000030237	28250	Slco1a4	-1.05204	1.97105e-05	0.000501336	-0.833789	0.00268519	0.0711854
ENSMUSG00000050010	330096	Shisa3	-1.14942	1.98314e-05	0.000503547	0.288623	0.257348	0.523473
ENSMUSG00000025981	67876	Coq10b	-0.709194	2.01046e-05	0.000509592	-0.35909	0.0762671	0.318007
ENSMUSG00000037490	353169	Slc2a12	0.571366	2.0138e-05	0.000509592	0.00301671	0.987137	0.994458
ENSMUSG00000023022	65970	Lima1	-0.482846	2.03251e-05	0.00051345	-0.441785	0.01231	0.150406
ENSMUSG00000028955	22319	Vamp3	-0.52153	2.06646e-05	0.000521141	-0.259152	0.0586144	0.28901
ENSMUSG00000025016	107358	Tm9sf3	-0.537439	2.10486e-05	0.000529925	-0.106365	0.616717	0.795729
ENSMUSG00000030659	53322	Nucb2	-0.6963	2.12159e-05	0.000533234	-0.361848	0.0344478	0.229335
ENSMUSG00000034463	219151	Scara3	-0.587058	2.16737e-05	0.00054382	-0.181798	0.480275	0.703336
ENSMUSG00000068874	20341	Selenbp1	0.460132	2.20557e-05	0.00055247	0.797856	0.000361584	0.0194304
ENSMUSG00000028656	12331	Cap1	-0.507523	2.21073e-05	0.00055283	0.0580349	0.785433	0.89537
ENSMUSG00000059456	19229	Ptk2b	0.510833	2.24819e-05	0.000561253	0.0194053	0.930718	0.970042
ENSMUSG00000037419	71946	Endod1	-0.537493	2.2749e-05	0.00056697	-0.313763	0.11539	0.371217
ENSMUSG00000028307	230163	Aldob	1.10002	2.29468e-05	0.000569985	0.0507299	0.852793	0.930401
ENSMUSG00000006587	30927	Snai3	1.13906	2.29367e-05	0.000569985	-0.0232457	0.932228	NA
ENSMUSG00000004655	11826	Aqp1	-0.657805	2.30622e-05	0.000571896	0.534323	0.0208592	0.189735
ENSMUSG00000040950	216864	Mgl2	-0.658756	2.33302e-05	0.000577579	-0.104342	0.652202	0.817409
ENSMUSG00000048154	381022	Mll2	0.740916	2.34235e-05	0.000578923	0.170519	0.365884	0.617758
ENSMUSG00000029659	70717	6330406I15Rik	-0.579647	2.3823e-05	0.000587819	-0.463345	0.00913617	0.130748
ENSMUSG00000040522	170744	Tlr8	-0.813835	2.41458e-05	0.000594796	-0.494659	0.0590142	0.28901
ENSMUSG00000071540	100504518	3425401B19Rik	0.572736	2.44591e-05	0.000601516	0.369759	0.0426475	0.252211
ENSMUSG00000042626	20416	Shc1	-0.475239	2.46814e-05	0.00060598	-0.073718	0.628896	0.8035
ENSMUSG00000054808	60595	Actn4	-0.743987	2.4796e-05	0.000607788	0.301823	0.114551	0.37032
ENSMUSG00000074001	72330	Kbtbd5	0.779027	2.50021e-05	0.00061183	0.165279	0.530872	0.738508
ENSMUSG00000022579	68453	Gpihbp1	-0.729661	2.51262e-05	0.000613856	0.787354	0.00229577	0.0656437
ENSMUSG00000062421	11841	Arf2	-0.493963	2.53217e-05	0.000617617	-0.239595	0.047323	0.26328
ENSMUSG00000029447	12466	Cct6a	-0.451524	2.54558e-05	0.00061987	-0.00877316	0.955781	0.981613
ENSMUSG00000024901	240518	Peli3	0.898455	2.58013e-05	0.00062623	0.330028	0.26711	0.530936
ENSMUSG00000057561	13664	Eif1a	-0.589721	2.57739e-05	0.00062623	-0.300504	0.0922794	0.340854
ENSMUSG00000045441	243385	Gprin3	0.956746	2.59885e-05	0.000629743	-0.614321	0.0272476	0.211881
ENSMUSG00000023828	20519	Slc22a3	0.551289	2.609e-05	0.000631175	0.509134	0.00320277	0.0784732
ENSMUSG00000043019	66967	Edem3	-0.465474	2.64526e-05	0.000638906	-0.193807	0.285547	0.54747
ENSMUSG00000033590	208943	Myo5c	0.844424	2.69851e-05	0.000649653	1.1225	4.3e-06	0.000540121
ENSMUSG00000041912	72634	Tdrkh	0.744582	2.7129e-05	0.000652061	0.255508	0.116639	0.372845
ENSMUSG00000031808	26457	Slc27a1	0.596211	2.74374e-05	0.000656351	-0.0555508	0.811626	0.909836
ENSMUSG00000034771	21886	Tle2	0.713173	2.7391e-05	0.000656351	0.532676	0.0579431	0.287421
ENSMUSG00000031502	12826	Col4a1	-0.711398	2.744e-05	0.000656351	0.098231	0.529346	0.737481
ENSMUSG00000048217	217214	Nags	1.15325	2.75329e-05	0.000657513	-0.108463	0.589197	NA
ENSMUSG00000078307	330941	AI593442	1.18045	2.85833e-05	0.000681504	0.325266	0.275194	0.538114
ENSMUSG00000027238	228564	Frmd5	-0.807934	2.86925e-05	0.000683011	-0.41503	0.07834	0.320146
ENSMUSG00000031375	12111	Bgn	-0.620645	2.88007e-05	0.000684488	-0.0236548	0.91834	0.963003
ENSMUSG00000027204	14118	Fbn1	-0.756809	2.89582e-05	0.000687134	0.0854463	0.673098	0.830913
ENSMUSG00000035530	20918	Eif1	0.742663	2.90254e-05	0.00068763	0.237551	0.281859	0.544271
ENSMUSG00000058355	24015	Abce1	-0.498011	2.92156e-05	0.000691033	-0.378229	0.0190338	0.181651
ENSMUSG00000030793	66824	Pycard	0.744446	2.93405e-05	0.000692884	0.147862	0.525659	0.734983
ENSMUSG00000020057	71712	Dram1	-0.67121	2.94239e-05	0.000693015	-0.25484	0.211819	0.47966
ENSMUSG00000026181	68606	Ppm1f	-0.571796	2.94394e-05	0.000693015	0.0619214	0.699009	0.844925
ENSMUSG00000029840	14489	Mtpn	-0.593155	2.96017e-05	0.000695734	-0.319124	0.126151	0.38419
ENSMUSG00000025314	19271	Ptprj	-0.513202	3.07358e-05	0.000721247	-0.150273	0.422248	0.661945
ENSMUSG00000040435	17872	Ppp1r15a	-0.729768	3.08767e-05	0.00072341	0.396562	0.116109	0.37245
ENSMUSG00000031232	67075	Magt1	-0.459778	3.2454e-05	0.000757973	-0.346253	0.0243854	0.203497
ENSMUSG00000060591	80876	Ifitm2	-0.687781	3.24416e-05	0.000757973	-0.112771	0.546661	0.74914
ENSMUSG00000003161	109552	Sri	-0.522445	3.29567e-05	0.000767302	-0.576327	0.0029817	0.0753397
ENSMUSG00000036867	17130	Smad6	-0.808009	3.30881e-05	0.000769157	-0.907407	0.000258343	0.015161
ENSMUSG00000015605	20807	Srf	-0.622282	3.33219e-05	0.00077338	-0.0289708	0.893261	0.95153
ENSMUSG00000061315	17938	Naca	0.749443	3.34771e-05	0.000774562	0.239115	0.304376	0.562383
ENSMUSG00000026639	16780	Lamb3	0.516158	3.34688e-05	0.000774562	0.984083	3.55e-05	0.00325187
ENSMUSG00000030137	53857	Tuba8	-0.751756	3.35488e-05	0.000775014	0.276268	0.224376	0.491974
ENSMUSG00000030207	74525	8430419L09Rik	0.649447	3.40255e-05	0.000783589	-0.0299886	0.858688	0.933087
ENSMUSG00000044583	170743	Tlr7	-0.842427	3.40084e-05	0.000783589	-0.536026	0.0107182	0.141554
ENSMUSG00000052676	215693	Zmat1	0.74758	3.41481e-05	0.000785195	-0.223846	0.273419	0.536298
ENSMUSG00000027993	80890	Trim2	-0.534931	3.45937e-05	0.000794212	-0.642037	0.000217007	0.0136724
ENSMUSG00000020773	217333	Trim47	-0.676079	3.48957e-05	0.000799908	-0.134353	0.481038	0.703704
ENSMUSG00000025810	18186	Nrp1	-0.518842	3.56853e-05	0.000816748	-0.270679	0.148235	0.413139
ENSMUSG00000003273	12348	Car11	0.652845	3.58711e-05	0.000819737	0.350219	0.237998	0.50471
ENSMUSG00000030930	77590	Chst15	-0.67801	3.61298e-05	0.000824381	0.793802	0.000218714	0.0137205
ENSMUSG00000016918	240725	Sulf1	-0.601578	3.64164e-05	0.000829646	-0.512048	0.0276714	0.212634
ENSMUSG00000028978	18127	Nos3	-0.718795	3.71456e-05	0.000844963	-0.011271	0.965111	0.986004
ENSMUSG00000020135	23805	Apc2	0.826054	3.73061e-05	0.000847317	-0.189595	0.49325	0.711826
ENSMUSG00000047821	94092	Trim16	-0.672122	3.76595e-05	0.000854038	-0.191456	0.351995	0.606983
ENSMUSG00000006281	21745	Tep1	0.449012	3.82249e-05	0.000865538	0.267338	0.138248	0.399616
ENSMUSG00000060671	54667	Atp8b2	-0.492225	3.86581e-05	0.000874015	0.0160491	0.926069	0.967691
ENSMUSG00000049791	14366	Fzd4	-0.648995	3.88283e-05	0.000876528	-0.188028	0.266582	0.53038
ENSMUSG00000024909	58859	Efemp2	-0.624595	3.96194e-05	0.000893029	0.327431	0.259731	0.525309
ENSMUSG00000037855	216049	Zfp365	-0.980715	4.01218e-05	0.000902984	-0.141517	0.558655	0.758101
ENSMUSG00000042734	69480	Ttc9	-0.986032	4.0333e-05	0.000906364	-0.585176	0.0301839	0.219224
ENSMUSG00000024743	54525	Syt7	0.54431	4.03998e-05	0.000906492	0.194737	0.254109	0.521122
ENSMUSG00000023927	20230	Satb1	0.603379	4.0526e-05	0.000906586	-0.395999	0.0311668	0.220974
ENSMUSG00000040327	78309	Cul9	0.541975	4.04874e-05	0.000906586	0.235398	0.309174	0.567022
ENSMUSG00000042354	30877	Gnl3	-0.594907	4.06181e-05	0.000907281	-0.209011	0.168163	0.43487
ENSMUSG00000037139	242702	Myom3	0.678376	4.06986e-05	0.000907713	0.0693358	0.773261	0.889577
ENSMUSG00000021477	13039	Ctsl	-0.391437	4.13407e-05	0.000917899	-0.216193	0.140853	0.403619
ENSMUSG00000057329	12043	Bcl2	-0.536802	4.1824e-05	0.000924484	0.268557	0.191145	0.460695
ENSMUSG00000057606	382864	Colq	-1.14318	4.17914e-05	0.000924484	1.81412	5.68e-12	3.06e-09
ENSMUSG00000022146	18414	Osmr	-0.684515	4.19845e-05	0.000926653	-0.535827	0.00763257	0.119243
ENSMUSG00000054958	230718	Nt5c1a	0.573831	4.22169e-05	0.000930401	0.295863	0.237035	0.503989
ENSMUSG00000034487	68304	Kdelc2	-0.507913	4.26676e-05	0.000937551	-0.171223	0.268785	0.533246
ENSMUSG00000034687	231470	Fras1	0.49552	4.27342e-05	0.000937627	-0.224371	0.327037	0.583869
ENSMUSG00000030731	20981	Syt3	0.852631	4.30423e-05	0.000942374	0.457028	0.12596	NA
ENSMUSG00000052496	18766	Pkdrej	0.576471	4.32081e-05	0.00094255	0.25066	0.224678	0.492243
ENSMUSG00000028690	67096	Mmachc	-0.475051	4.32123e-05	0.00094255	-0.237641	0.211405	0.47966
ENSMUSG00000034472	75141	Rasd2	0.897169	4.36455e-05	0.00094921	-0.0125537	0.966258	NA
ENSMUSG00000024759	109168	Atl3	-0.535064	4.35932e-05	0.00094921	-0.554952	0.00494298	0.0970852
ENSMUSG00000039376	68760	Synpo2l	-0.591645	4.39141e-05	0.000953655	0.0975587	0.621935	0.799467
ENSMUSG00000021036	20773	Sptlc2	-0.565523	4.48615e-05	0.000972807	-0.396988	0.00546201	0.102456
ENSMUSG00000051790	216856	Nlgn2	0.673259	4.4966e-05	0.000973653	0.482418	0.0589847	0.28901
ENSMUSG00000001435	12822	Col18a1	-0.64985	4.5163e-05	0.000976493	0.120652	0.622733	0.79982
ENSMUSG00000037060	109042	Prkcdbp	-0.530765	4.58099e-05	0.000989041	0.504361	0.0335805	0.226579
ENSMUSG00000034401	67946	Spata6	-0.620278	4.63495e-05	0.000998028	-0.331644	0.110727	0.36592
ENSMUSG00000032932	110920	Hspa13	-0.470332	4.63605e-05	0.000998028	-0.220972	0.293115	0.552873
ENSMUSG00000039763	246738	Dnajc28	0.476165	4.68024e-05	0.00100318	-0.0903458	0.545206	0.748309
ENSMUSG00000017774	17913	Myo1c	-0.549002	4.67722e-05	0.00100318	0.0242523	0.891001	0.950515
ENSMUSG00000042485	66175	Mustn1	-0.7421	4.66755e-05	0.00100318	0.152304	0.554597	0.755889
ENSMUSG00000022867	30940	Usp25	-0.427552	4.71476e-05	0.00100767	-0.375786	0.0508031	0.271535
ENSMUSG00000045657	93881	Pcdhb10	-1.13086	4.71145e-05	0.00100767	-0.283803	0.311403	0.568867
ENSMUSG00000028909	19273	Ptpru	0.561223	4.78022e-05	0.00102019	0.307127	0.156584	0.423277
ENSMUSG00000052512	78286	Nav2	0.525237	4.83509e-05	0.00102895	0.605874	0.00259565	0.0702345
ENSMUSG00000022987	239652	Zfp641	0.54131	4.88362e-05	0.00103779	-0.0583635	0.717995	0.856225
ENSMUSG00000028132	99887	Tmem56	0.78089	4.94414e-05	0.00104915	0.488464	0.0286586	0.216019
ENSMUSG00000030711	20887	Sult1a1	-0.765226	5.0068e-05	0.00106093	0.324363	0.0675328	0.303637
ENSMUSG00000025903	18777	Lypla1	-0.442334	5.04267e-05	0.00106701	-0.364682	0.143704	0.407424
ENSMUSG00000040322	229731	Slc25a24	-0.572028	5.12634e-05	0.00108312	-0.485517	0.0197636	0.185215
ENSMUSG00000038670	233199	Mybpc2	-0.583394	5.20349e-05	0.00109635	-0.236967	0.364572	0.616784
ENSMUSG00000044072	237711	Eml6	0.469249	5.22878e-05	0.00110012	-0.0163195	0.925712	0.967457
ENSMUSG00000044147	11845	Arf6	-0.538506	5.24095e-05	0.00110112	-0.280396	0.172996	0.439558
ENSMUSG00000039116	215798	Gpr126	-0.57036	5.26671e-05	0.00110497	-0.517114	0.0281406	0.214092
ENSMUSG00000023036	93716	Pcdhga9	0.726025	5.28984e-05	0.00110825	0.312551	0.0847048	0.328745
ENSMUSG00000032575	74840	Manf	-0.500322	5.30892e-05	0.00110912	0.463734	0.0262863	0.209506
ENSMUSG00000021365	18003	Nedd9	-0.85358	5.30434e-05	0.00110912	-0.335129	0.0915839	0.339793
ENSMUSG00000006782	12799	Cnp	0.528032	5.35233e-05	0.00111506	1.16641	1.11e-07	2.42e-05
ENSMUSG00000028933	57434	Xrcc2	0.629317	5.34829e-05	0.00111506	-0.0229455	0.881855	0.945149
ENSMUSG00000003131	18475	Pafah1b2	-0.474491	5.38028e-05	0.00111865	-0.332801	0.0448111	0.257507
ENSMUSG00000052566	170833	Hook2	0.794281	5.38466e-05	0.00111865	0.168692	0.489101	0.709073
ENSMUSG00000033032	106877	Afap1l1	-0.385303	5.39503e-05	0.00111924	0.130087	0.424563	0.662981
ENSMUSG00000025656	236915	Arhgef9	0.484062	5.47266e-05	0.00113376	-0.00536307	0.970369	0.988296
ENSMUSG00000070733	72313	Fryl	0.429303	5.4944e-05	0.00113668	0.492445	0.000361801	0.0194304
ENSMUSG00000026064	19243	Ptp4a1	-0.815702	5.56412e-05	0.00114951	-0.234394	0.23639	0.503602
ENSMUSG00000055980	16367	Irs1	-0.476945	5.5932e-05	0.00115391	-0.397869	0.0568053	0.285774
ENSMUSG00000031838	65972	Ifi30	-0.605637	5.61889e-05	0.0011576	0.105835	0.646735	0.813969
ENSMUSG00000042613	229534	Pbxip1	0.444608	5.65168e-05	0.00116274	0.0643512	0.706113	0.848933
ENSMUSG00000021094	66375	Dhrs7	0.537033	5.66147e-05	0.00116315	-0.0482086	0.727431	0.861538
ENSMUSG00000024529	16948	Lox	-0.852786	5.71029e-05	0.00117046	-0.367099	0.083531	0.327414
ENSMUSG00000024772	13660	Ehd1	-0.598747	5.71283e-05	0.00117046	-0.21894	0.133751	0.393574
ENSMUSG00000020077	19073	Srgn	-0.629214	5.74163e-05	0.00117474	-0.538649	0.0219865	0.194075
ENSMUSG00000023153	69671	Tmem52	-1.11634	5.75818e-05	0.00117651	0.143469	0.519885	NA
ENSMUSG00000027852	18176	Nras	-0.44134	5.76931e-05	0.00117716	-0.0642843	0.615306	0.794672
ENSMUSG00000053877	100043597	Srcap	0.543897	5.80389e-05	0.00118259	0.193744	0.369813	0.621293
ENSMUSG00000027940	59069	Tpm3	-0.582145	5.82141e-05	0.00118454	-0.107374	0.4359	0.671403
ENSMUSG00000043621	212190	Ubxn10	0.871116	5.86177e-05	0.00119112	0.255127	0.348783	0.6041
ENSMUSG00000031811	76454	Fbxo31	0.57874	5.92047e-05	0.0012014	#N/A	#N/A	#N/A
ENSMUSG00000054453	236643	Sytl5	-1.0665	6.09219e-05	0.00123456	-0.227031	0.426569	0.664291
ENSMUSG00000031007	70495	Atp6ap2	-0.514243	6.13211e-05	0.00123931	-0.369075	0.0579404	0.287421
ENSMUSG00000001864	108897	Aif1l	-0.648649	6.1323e-05	0.00123931	-0.440812	0.0394598	0.242681
ENSMUSG00000029648	14254	Flt1	-0.532724	6.19182e-05	0.00124794	-0.29597	0.0484199	0.266099
ENSMUSG00000036523	268527	Greb1	1.03977	6.18703e-05	0.00124794	0.170426	0.569467	NA
ENSMUSG00000020823	74136	Sec14l1	-0.498382	6.27402e-05	0.00126279	-0.0909824	0.577158	0.770002
ENSMUSG00000050705	69662	2310061I04Rik	0.563875	6.40433e-05	0.00128554	0.275834	0.293514	0.5532
ENSMUSG00000035765	69190	Dym	0.413136	6.44294e-05	0.00129154	0.191088	0.207028	0.475851
ENSMUSG00000028943	56226	Espn	0.827743	6.45796e-05	0.00129281	-0.112729	0.699592	0.84535
ENSMUSG00000045838	214239	A430105I19Rik	0.489171	6.48449e-05	0.00129637	0.167609	0.482326	0.704538
ENSMUSG00000020357	14257	Flt4	-0.618318	6.53345e-05	0.00130441	-0.114887	0.630864	0.804838
ENSMUSG00000053693	56527	Mast1	0.966701	6.55363e-05	0.00130668	0.0613476	0.714374	NA
ENSMUSG00000021493	67399	Pdlim7	-0.650275	6.57783e-05	0.00130853	0.221058	0.375332	0.625804
ENSMUSG00000020524	14799	Gria1	-1.01196	6.58055e-05	0.00130853	0.5995	0.0455624	0.259201
ENSMUSG00000035900	223752	Gramd4	0.571915	6.66248e-05	0.00132306	-0.0539691	0.804578	0.904933
ENSMUSG00000021583	80898	Erap1	-0.47203	6.69304e-05	0.00132585	-0.474773	0.00252452	0.0697188
ENSMUSG00000024867	18719	Pip5k1b	-0.426847	6.70336e-05	0.00132585	-0.593583	0.00454018	0.0941279
ENSMUSG00000003518	72349	Dusp3	-0.413905	6.79285e-05	0.00134177	0.0216302	0.84844	0.928017
ENSMUSG00000031246	56726	Sh3bgrl	-0.711577	6.80613e-05	0.00134261	-0.52745	0.0285888	0.216019
ENSMUSG00000022261	15529	Sdc2	-0.498428	6.82755e-05	0.00134505	-0.494881	0.0146844	0.162372
ENSMUSG00000020721	78455	Helz	0.473312	6.98332e-05	0.00137223	-0.0332502	0.846693	0.926942
ENSMUSG00000005268	19116	Prlr	0.753908	6.98403e-05	0.00137223	-0.752866	0.00146745	0.0504899
ENSMUSG00000013275	98396	Slc41a1	0.425575	7.01452e-05	0.00137506	0.449296	0.00386304	0.0868561
ENSMUSG00000038486	64051	Sv2a	0.520987	7.01694e-05	0.00137506	0.385844	0.0928752	0.341692
ENSMUSG00000021796	12166	Bmpr1a	-0.476391	7.40381e-05	0.00144896	-0.378679	0.0283133	0.214679
ENSMUSG00000053226	23863	Dand5	0.73391	7.45529e-05	0.00145688	0.288122	0.243762	0.510977
ENSMUSG00000071669	74478	Snx29	0.575506	7.46388e-05	0.00145688	0.246245	0.195992	0.465404
ENSMUSG00000032997	74241	Chpf	-0.615728	7.62942e-05	0.00148724	-0.245556	0.320002	0.5769
ENSMUSG00000040441	216441	Slc26a10	0.797086	7.65775e-05	0.0014908	0.819399	0.00368965	0.0852369
ENSMUSG00000074793	72630	Hspa12b	-0.596718	7.81733e-05	0.00151988	0.278016	0.252412	0.519625
ENSMUSG00000001027	110880	Scn4a	0.540167	7.84324e-05	0.00152093	0.398549	0.0841313	0.32783
ENSMUSG00000073557	329251	Ppp1r12b	0.37438	7.83314e-05	0.00152093	0.157407	0.341665	0.596727
ENSMUSG00000035024	78658	Ncapd3	0.408567	7.87722e-05	0.00152354	0.467586	0.000704874	0.0309932
ENSMUSG00000021221	70127	Dpf3	0.539439	7.87037e-05	0.00152354	0.445761	0.0112058	0.143944
ENSMUSG00000015961	11566	Adss	-0.631831	7.94331e-05	0.00153433	-0.605072	0.00177587	0.0568044
ENSMUSG00000073643	69368	Wdfy1	-0.464128	7.95678e-05	0.00153494	-0.412013	0.00627772	0.109263
ENSMUSG00000043631	407800	Ecm2	-0.480791	8.01124e-05	0.00154344	-0.204589	0.36639	0.618001
ENSMUSG00000032050	19684	Rdx	-0.475189	8.07701e-05	0.00155409	-0.474832	0.00238786	0.0673642
ENSMUSG00000062014	63985	Gmfb	-0.571442	8.22582e-05	0.00158068	-0.343668	0.0643921	0.297796
ENSMUSG00000026434	98415	Nucks1	-0.474864	8.30067e-05	0.001593	-0.299156	0.0816542	0.325142
ENSMUSG00000047793	208777	Sned1	0.488038	8.34699e-05	0.00159982	0.493934	0.00755637	0.118253
ENSMUSG00000034998	14236	Foxn2	-0.592378	8.36915e-05	0.001602	-0.386474	0.0681465	0.304795
ENSMUSG00000033684	104009	Qsox1	-0.516716	8.41099e-05	0.00160466	0.487218	0.0297268	0.217957
ENSMUSG00000023800	24001	Tiam2	-0.645865	8.41544e-05	0.00160466	0.312283	0.044002	0.255566
ENSMUSG00000043257	230801	Pigv	0.6686	8.40671e-05	0.00160466	0.22868	0.216532	0.484472
ENSMUSG00000040666	50795	Sh3bgr	-0.566209	8.53341e-05	0.00162507	0.371259	0.0231838	0.197966
ENSMUSG00000055044	54132	Pdlim1	-0.564419	8.58151e-05	0.00163005	-0.117477	0.589845	0.778154
ENSMUSG00000023036	93711	Pcdhga9	0.644878	8.57863e-05	0.00163005	0.312551	0.0847048	0.328745
ENSMUSG00000032637	233871	Atxn2l	0.48875	8.85218e-05	0.00167503	0.195254	0.374511	0.625144
ENSMUSG00000002985	11816	Apoe	-0.515108	8.84139e-05	0.00167503	0.246036	0.219752	0.487764
ENSMUSG00000046768	80837	Rhoj	-0.683238	9.06382e-05	0.0017129	-0.592533	0.000248564	0.0147657
ENSMUSG00000007646	114714	Rad51c	0.880575	9.07637e-05	0.00171309	-0.122745	0.611296	0.792567
ENSMUSG00000068699	68794	Flnc	-0.714556	9.1306e-05	0.00171932	0.0715012	0.7495	0.875074
ENSMUSG00000023991	74123	Foxp4	0.622439	9.14031e-05	0.00171932	0.135156	0.6508	0.81653
ENSMUSG00000006445	13836	Epha2	-0.799882	9.14408e-05	0.00171932	-0.0258871	0.927583	0.968185
ENSMUSG00000046434	15382	Hnrnpa1	-0.745424	9.25964e-05	0.00173885	-0.172997	0.465974	0.692972
ENSMUSG00000036833	241274	Pnpla7	0.411677	9.35503e-05	0.00175454	0.361194	0.0862523	0.332094
ENSMUSG00000025134	21681	Alyref	-0.584465	9.39932e-05	0.00176062	0.03982	0.781088	0.893329
ENSMUSG00000027479	13589	Mapre1	-0.440398	9.47114e-05	0.00177116	-0.206337	0.114642	0.370402
ENSMUSG00000038587	83397	Akap12	-0.566997	9.47941e-05	0.00177116	-0.299359	0.0773321	0.319003
ENSMUSG00000000555	16402	Itga5	-0.601695	9.49538e-05	0.00177192	0.562334	0.0186541	0.179439
ENSMUSG00000061100	57262	Retnla	-0.650043	9.60578e-05	0.00179027	-0.536669	0.0529196	0.27655
ENSMUSG00000009545	16535	Kcnq1	0.519194	9.78161e-05	0.00182075	0.568239	0.00774427	0.119717
ENSMUSG00000028088	14263	Fmo5	0.567112	9.91381e-05	0.00184305	-0.219885	0.0902371	0.338069
ENSMUSG00000030878	12585	Cdr2	-0.542689	9.96091e-05	0.00184949	-0.414511	0.00224675	0.0646229
ENSMUSG00000027408	56264	Cpxm1	-0.630472	0.000100029	0.00185497	0.311879	0.268245	0.532539
ENSMUSG00000029622	11867	Arpc1b	-0.582824	0.000100733	0.0018657	-0.45156	0.0464566	0.261525
ENSMUSG00000021495	212483	Fam193b	0.501557	0.000102877	0.00190135	0.570819	0.0180378	0.177408
ENSMUSG00000053024	21367	Cntn2	-0.846385	0.000102914	0.00190135	-2.34277	6.73e-18	6.53e-15
ENSMUSG00000033732	101943	Sf3b3	-0.376355	0.000103281	0.00190425	0.151885	0.461963	0.689827
ENSMUSG00000024247	106522	Pkdcc	-0.57611	0.000103456	0.00190425	-0.176226	0.525368	0.734781
ENSMUSG00000026604	19250	Ptpn14	-0.570362	0.000103414	0.00190425	-0.352673	0.100166	0.352361
ENSMUSG00000039239	21808	Tgfb2	-0.509294	0.000104044	0.00191271	-0.143102	0.407972	0.651709
ENSMUSG00000012017	224024	Scarf2	-0.612	0.000105498	0.00193703	-0.123424	0.675346	0.83169
ENSMUSG00000051439	12475	Cd14	-0.683253	0.000106481	0.00195269	-0.0329257	0.898671	0.954492
ENSMUSG00000035829	241289	Ppp1r26	0.694994	0.000107303	0.00196532	0.3707	0.0588371	0.28901
ENSMUSG00000024193	21652	Phf1	0.573639	0.000109513	0.00200333	0.311746	0.0820846	0.326024
ENSMUSG00000004187	16581	Kifc2	0.655588	0.000110119	0.00201142	0.444248	0.1191	0.375502
ENSMUSG00000073858	319622	Itpripl2	-0.405968	0.000110226	0.00201142	#N/A	#N/A	#N/A
ENSMUSG00000029328	50926	Hnrpdl	-0.500503	0.000110958	0.0020223	-0.146137	0.409599	0.651966
ENSMUSG00000031613	15446	Hpgd	-0.770596	0.000111152	0.00202334	-0.533433	0.0443451	0.256074
ENSMUSG00000079188	665574	Gm7694	0.664347	0.000114455	0.00207839	#N/A	#N/A	#N/A
ENSMUSG00000018126	207495	Baiap2l2	0.980705	0.000115915	0.00210233	0.234609	0.408875	NA
ENSMUSG00000054641	70945	Mmrn1	-0.853831	0.000116095	0.00210303	-0.65728	0.00612583	0.108098
ENSMUSG00000036975	66343	Tmem177	0.48587	0.000118636	0.00214644	0.566338	0.00543614	0.102456
ENSMUSG00000011263	74463	Exoc3l2	-0.82721	0.000118997	0.00215034	-0.0759434	0.800016	0.902522
ENSMUSG00000027288	20402	Zfp106	0.362689	0.000119252	0.00215233	-0.061925	0.640296	0.810317
ENSMUSG00000026090	72097	2010300C02Rik	0.780263	0.000119599	0.00215598	-0.259933	0.361598	0.614761
ENSMUSG00000030082	53421	Sec61a1	-0.491319	0.000119927	0.00215927	-0.118305	0.369716	0.621273
ENSMUSG00000020794	67128	Ube2g1	-0.597815	0.000120093	0.00215964	-0.43223	0.0413976	0.248454
ENSMUSG00000023036	93703	Pcdhga9	0.644347	0.000120562	0.00216284	0.312551	0.0847048	0.328745
ENSMUSG00000024769	240505	Cdc42bpg	0.494921	0.000120464	0.00216284	-0.174324	0.385066	0.634467
ENSMUSG00000004460	67838	Dnajb11	-0.401521	0.000121266	0.00217285	0.307037	0.0800935	0.3224
ENSMUSG00000037601	18102	Nme1	-0.652387	0.000121938	0.00218225	0.0998044	0.578168	0.770502
ENSMUSG00000075033	385658	Fam55c	0.630926	0.000125374	0.00223732	0.0892841	0.646412	0.813782
ENSMUSG00000034449	192970	Dhrs11	0.497261	0.000125467	0.00223732	0.300345	0.173518	0.439894
ENSMUSG00000070509	244058	Rgma	0.624916	0.00012536	0.00223732	0.332711	0.194107	0.463501
ENSMUSG00000068551	68910	Zfp467	0.537934	0.000125803	0.00224061	-0.128213	0.571639	0.765906
ENSMUSG00000039154	20420	Shd	0.787994	0.0001261	0.00224322	-0.113106	0.693391	NA
ENSMUSG00000063406	73130	Tmed5	-0.76485	0.000127152	0.00225923	-0.537731	0.0303259	0.219803
ENSMUSG00000037196	69310	Pacrg	0.86949	0.000127535	0.00226332	0.528829	0.065268	0.299679
ENSMUSG00000024533	68166	Spire1	-0.633328	0.000128327	0.00227467	-0.386734	0.0313643	0.221608
ENSMUSG00000037686	104816	Aspg	0.984741	0.00012864	0.0022775	-0.0424504	0.883641	NA
ENSMUSG00000039741	268515	Bahcc1	0.7434	0.000129226	0.00228243	0.15889	0.558757	0.758101
ENSMUSG00000031273	94216	Col4a6	-0.417815	0.000129133	0.00228243	0.403805	0.0547143	0.280966
ENSMUSG00000022754	56277	Tmem45a	-0.738088	0.00012939	0.00228261	-0.216298	0.343448	0.598628
ENSMUSG00000034158	320184	Lrrc58	-0.607291	0.00013046	0.00229603	-0.347097	0.043157	0.253648
ENSMUSG00000071656	68852	Lrrn4cl	-0.649971	0.000130442	0.00229603	-0.404685	0.122888	0.378942
ENSMUSG00000027820	17380	Mme	-0.546355	0.000132325	0.0023261	-0.464971	0.0392141	0.242382
ENSMUSG00000024993	67894	Fam45a	-0.571928	0.000133915	0.00235128	-0.348689	0.0660823	0.301115
ENSMUSG00000021388	66695	Aspn	-0.587138	0.000134798	0.00236398	0.0918634	0.72773	0.861649
ENSMUSG00000054477	140492	Kcnn2	0.745943	0.000135439	0.00237242	0.276839	0.178083	0.444344
ENSMUSG00000050064	242109	Zfp697	-0.692234	0.000136538	0.00238886	-0.0847313	0.557109	0.757735
ENSMUSG00000018841	19364	Rad51l3	0.51589	0.000136831	0.00239117	0.202223	0.265753	0.530059
ENSMUSG00000004044	19285	Ptrf	-0.413932	0.000139364	0.00243045	0.101151	0.546474	0.749047
ENSMUSG00000031442	17207	Mcf2l	-0.654626	0.000139406	0.00243045	0.189745	0.356273	0.610754
ENSMUSG00000021508	57266	Cxcl14	-0.647567	0.000140861	0.00245293	0.603393	0.019322	0.183037
ENSMUSG00000048004	217951	Tmem196	0.973394	0.000142028	0.00247035	-0.216558	0.401205	0.64628
ENSMUSG00000022758	18440	P2rx6	0.697933	0.000142476	0.00247525	0.537907	0.0488057	0.266736
ENSMUSG00000027611	19124	Procr	-0.738438	0.000143792	0.0024952	-0.193567	0.365424	0.617197
ENSMUSG00000028843	73723	Sh3bgrl3	-0.624722	0.000145002	0.00251325	0.0763463	0.798964	0.902384
ENSMUSG00000036617	208618	Etl4	0.620636	0.000145685	0.00252215	0.0511143	0.743073	0.87159
ENSMUSG00000035545	232798	Leng8	0.39918	0.000146335	0.00253045	0.409683	0.0891526	0.336437
ENSMUSG00000007815	11848	Rhoa	-0.373059	0.000146939	0.00253499	-0.0567675	0.695805	0.843544
ENSMUSG00000048583	16002	Igf2	-0.690326	0.000146862	0.00253499	-1.5268	1.18e-12	6.84e-10
ENSMUSG00000032554	22041	Trf	-0.434829	0.00014833	0.00255011	-0.0513215	0.858193	0.932936
ENSMUSG00000020092	27355	X99384	-0.627172	0.000148179	0.00255011	-0.0425772	0.85022	0.929071
ENSMUSG00000037795	333789	N4bp2	0.481706	0.000149811	0.00257259	-0.16389	0.348665	0.604031
ENSMUSG00000021171	52635	Esyt2	-0.511559	0.000150344	0.00257876	-0.387079	0.0203988	0.188378
ENSMUSG00000004347	18575	Pde1c	0.515889	0.000151862	0.0026018	-0.31317	0.0767061	0.318286
ENSMUSG00000057411	214917	Fam173a	0.586473	0.000152456	0.00260897	0.595973	0.0215723	0.191792
ENSMUSG00000025809	16412	Itgb1	-0.416371	0.000152911	0.00261374	-0.188264	0.208549	0.477011
ENSMUSG00000037660	238057	Gdf7	0.648587	0.000156619	0.00267404	-0.428735	0.1243	NA
ENSMUSG00000033377	114301	Palmd	-0.465433	0.000156936	0.00267639	-0.309538	0.0322991	0.224169
ENSMUSG00000042423	14123	Fbrs	0.541579	0.000159982	0.00272519	0.0601702	0.810196	0.909004
ENSMUSG00000021313	20191	Ryr2	0.555845	0.000163529	0.00277924	0.0481552	0.803776	0.90431
ENSMUSG00000002205	101568	Vrk3	0.467376	0.000164489	0.002786	0.274792	0.224399	0.491974
ENSMUSG00000036943	235442	Rab8b	-0.464368	0.000164325	0.002786	-0.442789	0.0227037	0.195873
ENSMUSG00000027254	17754	Mtap1a	0.573227	0.000164314	0.002786	0.404093	0.0196453	0.184941
ENSMUSG00000060548	29820	Tnfrsf19	0.640353	0.000165925	0.00280711	0.282373	0.0959243	0.346496
ENSMUSG00000024109	18189	Nrxn1	-0.917825	0.000166664	0.00281641	-0.4282	0.0580011	0.287421
ENSMUSG00000054675	231633	Tmem119	-0.769502	0.000167636	0.00282702	-0.207698	0.441234	0.674841
ENSMUSG00000021474	14057	Sfxn1	-0.504216	0.000167672	0.00282702	-0.312388	0.0697569	0.307794
ENSMUSG00000060962	73712	Dmkn	0.961837	0.000168825	0.00284001	-0.222415	0.45181	0.682333
ENSMUSG00000022701	212153	2610015P09Rik	0.723796	0.000169263	0.00284415	0.257491	0.117885	0.374117
ENSMUSG00000028382	230257	Rod1	-0.559346	0.000174094	0.00292203	-0.454507	0.0441783	0.255619
ENSMUSG00000024827	104174	Gldc	-0.857211	0.000174668	0.00292834	-0.146802	0.613535	0.793441
ENSMUSG00000029333	320292	Rasgef1b	-0.787051	0.000176356	0.00295332	-0.343132	0.104086	0.358294
ENSMUSG00000060843	216033	Ctnna3	0.506448	0.000176562	0.00295343	0.184591	0.305055	0.562566
ENSMUSG00000027706	69276	Sec62	-0.4632	0.000177149	0.00295993	-0.404084	0.0491764	0.267757
ENSMUSG00000040774	99712	Cept1	-0.532811	0.00017792	0.00296131	-0.347262	0.0308986	0.220588
ENSMUSG00000045680	21412	Tcf21	-0.593034	0.00017803	0.00296131	-0.321198	0.147188	0.41156
ENSMUSG00000005087	12505	Cd44	-0.522904	0.000177997	0.00296131	-0.180088	0.272919	0.535741
ENSMUSG00000021756	16195	Il6st	-0.355014	0.000177535	0.00296131	-0.38173	0.0156872	0.167214
ENSMUSG00000052336	13051	Cx3cr1	-0.949156	0.000179038	0.00297475	-0.142619	0.595221	0.781845
ENSMUSG00000032806	214601	Slc10a3	-0.574776	0.000179987	0.00298718	0.0063541	0.977683	0.991399
ENSMUSG00000038991	105245	Txndc5	-0.423937	0.000181513	0.00300914	0.622361	0.0016261	0.0539094
ENSMUSG00000063681	170788	Crb1	1.06505	0.000185046	0.0030643	-0.0806302	0.786145	0.895761
ENSMUSG00000067194	66235	Eif1ax	-0.442039	0.000185649	0.00307085	-0.216933	0.257156	0.523273
ENSMUSG00000023000	13363	Dhh	-1.01457	0.000186158	0.00307585	-0.00887084	0.976398	0.990892
ENSMUSG00000061322	68922	Dnaic1	-0.875126	0.000186592	0.00307621	0.462038	0.119367	0.375627
ENSMUSG00000022797	22042	Tfrc	-0.972704	0.000186594	0.00307621	-0.174603	0.420712	0.660698
ENSMUSG00000061607	240087	Mdc1	0.474459	0.000188797	0.00310908	-0.00551979	0.97523	0.990303
ENSMUSG00000049929	78134	Lpar4	-0.971574	0.000190324	0.00313075	-0.362471	0.17246	0.438733
ENSMUSG00000028249	53378	Sdcbp	-0.425331	0.00019077	0.00313116	-0.270547	0.06339	0.296078
ENSMUSG00000006494	228026	Pdk1	0.328211	0.000190658	0.00313116	-0.248843	0.173479	0.439894
ENSMUSG00000055322	21961	Tns1	0.589113	0.000191823	0.00314496	0.205427	0.270635	0.534294
ENSMUSG00000063810	236266	Alms1	0.53604	0.000192134	0.00314659	-0.21187	0.203547	0.474899
ENSMUSG00000031767	67528	Nudt7	0.535908	0.000194559	0.0031828	-0.0724884	0.595817	0.781852
ENSMUSG00000009614	192166	Sardh	-0.650042	0.000195699	0.00319792	0.221297	0.426043	0.663829
ENSMUSG00000031517	234267	Gpm6a	-0.657655	0.000196913	0.00321422	-0.741281	0.00575102	0.105328
ENSMUSG00000051184	66056	Zfp524	0.677443	0.000197463	0.00321434	0.194952	0.475149	NA
ENSMUSG00000026791	56017	Slc2a8	0.5085	0.00019716	0.00321434	0.393506	0.153264	0.418743
ENSMUSG00000021728	13723	Emb	-0.778624	0.000197569	0.00321434	-0.178884	0.409707	0.651966
ENSMUSG00000025723	68039	Nmb	-0.999493	0.000198182	0.00322079	-0.0228301	0.938977	0.974511
ENSMUSG00000017493	16010	Igfbp4	-0.437098	0.000200217	0.0032503	-0.32796	0.128781	0.387648
ENSMUSG00000036792	109241	Mbd5	0.422868	0.000200516	0.00325159	-0.173958	0.202337	0.47349
ENSMUSG00000054619	70152	Mettl7a1	0.413245	0.000202294	0.00327686	-0.27475	0.0391902	0.242382
ENSMUSG00000047888	213988	Tnrc6b	0.49294	0.000205046	0.00331421	-0.0292916	0.869969	0.938238
ENSMUSG00000028277	56228	Ube2j1	-0.496421	0.000206229	0.0033297	-0.247127	0.162324	0.428993
ENSMUSG00000039787	99151	Cercam	-0.68244	0.000212408	0.00342575	-0.00114646	0.996587	0.997958
ENSMUSG00000075415	14269	Fnbp1	0.507324	0.000212926	0.00343037	0.176062	0.211174	0.479538
ENSMUSG00000026600	20652	Soat1	-0.508575	0.000213345	0.0034334	-0.126816	0.488251	0.708638
ENSMUSG00000041798	103988	Gck	0.957758	0.0002144	0.00344664	-0.411439	0.136221	NA
ENSMUSG00000042305	57439	Tmem183a	-0.429706	0.000219862	0.00352862	-0.266177	0.055952	0.2836
ENSMUSG00000002997	19088	Prkar2b	-0.784967	0.000223858	0.00358704	-0.989541	0.000846355	0.0350668
ENSMUSG00000069171	13865	Nr2f1	0.53755	0.000227682	0.00362874	-0.623387	0.0181395	0.177511
ENSMUSG00000007613	21812	Tgfbr1	-0.506286	0.000226952	0.00362874	-0.360912	0.0685696	0.305281
ENSMUSG00000020546	20913	Stxbp4	0.519448	0.00022755	0.00362874	-0.0439634	0.759057	0.880895
ENSMUSG00000032648	19309	Pygm	0.399004	0.000227655	0.00362874	0.5427	0.00807022	0.122262
ENSMUSG00000025241	17281	Fyco1	0.526459	0.000229231	0.00364952	-0.106418	0.463039	0.690619
ENSMUSG00000025059	14933	Gyk	-0.470333	0.000229723	0.00365344	-0.531326	0.00680431	0.113306
ENSMUSG00000004771	53869	Rab11a	-0.473832	0.00023237	0.00369158	-0.376419	0.0458513	0.259657
ENSMUSG00000056851	18521	Pcbp2	0.528869	0.000233817	0.00370663	0.137837	0.513503	0.726502
ENSMUSG00000063529	380842	Gm1574	0.812848	0.000233816	0.00370663	-0.113152	0.652666	0.817649
ENSMUSG00000030539	20352	Sema4b	0.445137	0.000236245	0.00374114	-0.013809	0.950221	0.979427
ENSMUSG00000033585	17984	Ndn	-0.528041	0.000238059	0.00376584	-0.325755	0.122278	0.378405
ENSMUSG00000029862	12723	Clcn1	0.491335	0.000239635	0.00378675	0.94952	7.84e-05	0.00587869
ENSMUSG00000030148	26888	Clec4a2	-0.93151	0.000240187	0.00379143	-0.624894	0.0181915	0.177511
ENSMUSG00000022095	239170	Fam160b2	0.609424	0.000244413	0.00385405	0.34502	0.118385	0.374804
ENSMUSG00000020486	18952	38231	0.458741	0.000245637	0.00386924	0.309458	0.164742	0.43184
ENSMUSG00000026399	13136	Cd55	-0.52492	0.000247688	0.00389742	-0.46332	0.0431559	0.253648
ENSMUSG00000043008	239743	Klhl6	-0.617764	0.000250486	0.00393727	0.315579	0.107184	0.361749
ENSMUSG00000027489	56846	Necab3	0.974378	0.000252551	0.00396553	0.0502468	0.861994	NA
ENSMUSG00000032558	74025	Nphp3	0.408651	0.000254091	0.00398549	0.237909	0.0639562	0.297007
ENSMUSG00000059439	192197	Bcas3	0.389101	0.000254831	0.00399289	0.285545	0.13216	0.391497
ENSMUSG00000025597	237010	Klhl4	-0.564251	0.00025575	0.00400306	-0.631841	0.00748732	0.118253
ENSMUSG00000051483	12408	Cbr1	0.445858	0.000256661	0.0040131	0.53764	0.0161373	0.169684
ENSMUSG00000039891	378431	Txlnb	0.422562	0.000257468	0.00401942	-0.21338	0.318629	0.575463
ENSMUSG00000038256	77578	Bcl9	0.599581	0.000257607	0.00401942	-0.0338363	0.880449	0.944437
ENSMUSG00000040711	268396	Sh3pxd2b	-0.588835	0.000260117	0.00405433	0.583032	0.0208716	0.189735
ENSMUSG00000037119	210998	D15Ertd621e	-0.524627	0.000260508	0.00405617	-0.391356	0.0189378	0.180972
ENSMUSG00000056476	329650	Med12l	0.558036	0.000261024	0.00405995	0.0887931	0.615931	0.795267
ENSMUSG00000038387	20130	Rras	-0.572737	0.000261903	0.00406834	0.290236	0.274927	0.538024
ENSMUSG00000028960	63958	Ube4b	0.408004	0.000262111	0.00406834	0.163812	0.357603	0.611485
ENSMUSG00000030269	97287	Mtmr14	0.445392	0.000265185	0.00411175	0.436052	0.0421538	0.251303
ENSMUSG00000027861	12373	Casq2	-0.507044	0.000265796	0.00411693	0.419568	0.0148277	0.16287
ENSMUSG00000012405	66480	Rpl15	-0.50166	0.000266241	0.00411952	-0.229074	0.275496	0.538289
ENSMUSG00000021112	56217	Mpp5	-0.486072	0.000266681	0.00412204	-0.351768	0.0623615	0.29382
ENSMUSG00000036752	227613	Tubb4b	-0.563859	0.000267572	0.00413152	0.606558	0.00448414	0.0939023
ENSMUSG00000075602	110454	Ly6a	-0.441772	0.000268814	0.00414637	0.137547	0.506271	0.72139
ENSMUSG00000030352	109246	Tspan9	-0.470785	0.000271858	0.00418898	0.36954	0.0608119	0.292236
ENSMUSG00000033107	67664	Rnf125	-0.821796	0.000274425	0.00422416	-0.198568	0.305054	0.562566
ENSMUSG00000025782	209361	Taf3	0.498376	0.000274847	0.0042247	-0.161605	0.328354	0.585094
ENSMUSG00000045136	73710	Tubb2b	-0.947726	0.000275029	0.0042247	-0.21259	0.463852	0.691322
ENSMUSG00000020841	12874	Cpd	-0.381113	0.00027616	0.00423769	-0.0508142	0.704835	0.848458
ENSMUSG00000052712	80748	BC004004	0.364662	0.000277734	0.00424868	0.105723	0.568022	0.764188
ENSMUSG00000021458	72061	2010111I01Rik	-0.456715	0.000277643	0.00424868	0.136273	0.436988	0.672162
ENSMUSG00000021130	108760	Galntl1	-0.745712	0.00027766	0.00424868	0.00244339	0.992997	0.996626
ENSMUSG00000025804	12768	Ccr1	-0.912488	0.000279588	0.00427263	-0.323051	0.252532	0.519667
ENSMUSG00000038201	16495	Kcna7	0.590001	0.000280915	0.00428653	-0.032723	0.85594	0.932068
ENSMUSG00000047867	231931	Gimap6	-0.588021	0.000281074	0.00428653	-0.0530122	0.711096	0.852004
ENSMUSG00000033458	330554	Fan1	0.528424	0.000285363	0.00434301	0.232847	0.146051	0.410194
ENSMUSG00000022220	104110	Adcy4	-0.58666	0.000285818	0.00434549	0.170273	0.518471	0.729629
ENSMUSG00000026603	226830	Smyd2	-0.647295	0.000286232	0.00434733	-0.0865886	0.741661	0.870916
ENSMUSG00000059173	18573	Pde1a	-0.549711	0.000286736	0.00435054	-0.377641	0.060175	0.291173
ENSMUSG00000033720	94282	Sfxn5	0.627599	0.000287326	0.00435503	-0.0209873	0.939211	0.974551
ENSMUSG00000054206	16904	Gzmm	0.763602	0.000289957	0.00439044	0.418795	0.141378	0.404317
ENSMUSG00000040543	327958	Pitpnm3	0.73162	0.00029095	0.00440099	-0.387019	0.15695	0.423559
ENSMUSG00000035486	216166	Plk5	0.95809	0.000292346	0.00441761	-0.220646	0.31761	NA
ENSMUSG00000038022	330323	Fam188b	0.502187	0.000295526	0.00446112	0.255197	0.228645	0.496598
ENSMUSG00000024095	72692	Hnrpll	-0.456395	0.000296809	0.00447594	-0.136811	0.457333	0.687355
ENSMUSG00000034910	72135	Pygo1	0.499477	0.000297205	0.00447737	-0.437747	0.0214025	0.191334
ENSMUSG00000036026	224807	Tmem63b	0.418774	0.00029893	0.0044988	0.386633	0.0650629	0.299281
ENSMUSG00000079055	110893	Slc8a3	0.814443	0.000299286	0.00449959	1.21596	7.78e-06	0.000891609
ENSMUSG00000028480	384009	Glipr2	-0.655519	0.000300711	0.00451644	-0.251571	0.167363	0.433727
ENSMUSG00000028838	56219	Extl1	0.440198	0.000301253	0.00452002	0.605829	0.00546209	0.102456
ENSMUSG00000029624	71799	Ptcd1	0.446233	0.000303521	0.00454944	0.521294	0.0314607	0.221676
ENSMUSG00000018001	19159	Cyth3	-0.433011	0.000305552	0.00457527	-0.0725128	0.609912	0.791866
ENSMUSG00000022793	56375	B4galt4	-0.499671	0.00030685	0.00459008	-0.0599022	0.702348	0.846995
ENSMUSG00000024353	69816	2010001M09Rik	0.891983	0.00030948	0.00462191	0.0648884	0.828635	NA
ENSMUSG00000006740	16573	Kif5b	-0.39483	0.000311387	0.00464392	-0.451933	0.0105775	0.140589
ENSMUSG00000039782	231207	Cpeb2	0.57327	0.000311998	0.0046452	-0.185682	0.379767	0.62988
ENSMUSG00000023036	93707	Pcdhga9	0.795313	0.000312098	0.0046452	0.312551	0.0847048	0.328745
ENSMUSG00000040694	11811	Apobec2	0.392103	0.000312787	0.00465078	0.315744	0.0996104	0.351279
ENSMUSG00000038204	117590	Asb10	0.412136	0.000315263	0.00468292	0.367268	0.0781822	0.320014
ENSMUSG00000025175	63828	Fn3k	0.514103	0.000318032	0.00471933	0.62959	0.00330273	0.0801133
ENSMUSG00000038212	66631	Hiatl1	-0.496223	0.000320178	0.00474643	-0.335632	0.132354	0.391919
ENSMUSG00000021236	12499	Entpd5	0.426958	0.000323165	0.00478594	-0.217166	0.169254	0.435919
ENSMUSG00000015852	80891	Fcrls	-0.564288	0.000326247	0.00482676	-0.0466173	0.859799	0.933496
ENSMUSG00000009394	20965	Syn2	-0.428024	0.000328917	0.00485766	0.232427	0.0867602	0.333075
ENSMUSG00000020668	16570	Kif3c	0.492819	0.000328989	0.00485766	0.419791	0.0911117	0.339314
ENSMUSG00000020122	13649	Egfr	-0.490339	0.000331321	0.00488238	-0.101019	0.600201	0.785198
ENSMUSG00000030880	26939	Polr3e	-0.470814	0.000339353	0.00499579	-0.127024	0.364527	0.616784
ENSMUSG00000030739	71960	Myh14	0.512073	0.000339907	0.00499899	0.0124298	0.958723	0.982623
ENSMUSG00000024074	50766	Crim1	-0.49574	0.000340632	0.00500469	-0.518426	0.0248469	0.204885
ENSMUSG00000020358	15384	Hnrnpab	-0.377288	0.000341836	0.00501742	-0.0726518	0.56291	0.761423
ENSMUSG00000027429	27054	Sec23b	-0.453388	0.00034323	0.00503292	-0.0510955	0.650312	0.816269
ENSMUSG00000022200	66629	Golph3	-0.4051	0.000344517	0.0050468	-0.410394	0.025161	0.206538
ENSMUSG00000036334	242050	Igsf10	-0.525242	0.000346051	0.00506428	0.0159227	0.951721	0.979927
ENSMUSG00000041355	66256	Ssr2	-0.409139	0.000347652	0.0050827	0.531275	0.036968	0.237018
ENSMUSG00000023912	74011	Slc25a27	0.733549	0.00034989	0.00511039	0.0569147	0.795124	0.900213
ENSMUSG00000051344	241075	Plekhm3	0.438551	0.000352624	0.00514526	0.458803	0.000918101	0.037014
ENSMUSG00000005973	19672	Rcn1	-0.38651	0.000355847	0.00518719	-0.0720065	0.659079	0.822221
ENSMUSG00000004530	23790	Coro1c	-0.502294	0.00035907	0.00522806	-0.157031	0.435262	0.670917
ENSMUSG00000048776	19227	Pthlh	-0.82489	0.000359355	0.00522806	-1.10029	0.000216866	0.0136724
ENSMUSG00000025350	19682	Rdh5	0.739444	0.000368199	0.00535149	0.363969	0.219001	0.486877
ENSMUSG00000022032	71145	Scara5	-0.551642	0.000372897	0.0054093	-0.325306	0.183203	0.451233
ENSMUSG00000062991	211323	Nrg1	-0.911164	0.000372904	0.0054093	0.358516	0.186605	0.455183
ENSMUSG00000027784	242083	Ppm1l	0.39842	0.000373668	0.00541508	0.0911494	0.459872	0.689145
ENSMUSG00000040212	13732	Emp3	-0.556955	0.000374352	0.00541971	-0.0674778	0.811699	0.909848
ENSMUSG00000021282	217869	Eif5	-0.508391	0.000376307	0.00544271	-0.38618	0.0260737	0.209193
ENSMUSG00000031703	71927	Itfg1	-0.440225	0.000378786	0.00547323	-0.190218	0.166155	0.43283
ENSMUSG00000031841	12554	Cdh13	0.367613	0.000380224	0.00548868	0.206684	0.280182	0.542895
ENSMUSG00000025025	17859	Mxi1	0.36781	0.000384101	0.00553926	-0.274293	0.0856829	0.33104
ENSMUSG00000008206	67260	Lass4	0.397104	0.000385261	0.0055506	0.199425	0.165135	0.43226
ENSMUSG00000047996	546336	Prrg1	-0.645711	0.000387259	0.00557398	-0.306032	0.239003	0.50569
ENSMUSG00000026069	17082	Il1rl1	-0.924652	0.000390124	0.00560979	-0.5639	0.042635	0.252211
ENSMUSG00000032115	12282	Hyou1	-0.459693	0.000390667	0.00561216	0.438509	0.0490775	0.267619
ENSMUSG00000036764	30045	Dnajc12	0.600388	0.000396384	0.00568878	-0.122984	0.585743	0.775523
ENSMUSG00000066150	20529	Slc31a1	-0.502337	0.000397303	0.00569647	-0.298975	0.0589273	0.28901
ENSMUSG00000035849	268481	Krt222	-0.514783	0.000401691	0.00575382	-0.204352	0.242981	0.510148
ENSMUSG00000028116	59006	Myoz2	-0.466452	0.00040252	0.00576014	0.0483862	0.818188	0.913123
ENSMUSG00000032245	76524	Cln6	0.474961	0.000404549	0.00578361	0.480748	0.0510993	0.272218
ENSMUSG00000041889	77552	Shisa4	-0.765495	0.000405375	0.00578985	0.0367196	0.89769	0.953996
ENSMUSG00000007097	98660	Atp1a2	0.425086	0.000407444	0.0058138	0.0740902	0.642632	0.811563
ENSMUSG00000020747	71947	2310067B10Rik	0.409153	0.000414818	0.00591334	0.218603	0.270918	0.534563
ENSMUSG00000025608	27205	Podxl	-0.617633	0.000416187	0.00592718	-0.453388	0.021903	0.193668
ENSMUSG00000026797	20910	Stxbp1	0.452871	0.000417877	0.00594554	0.144079	0.401777	0.646727
ENSMUSG00000018263	21388	Tbx5	0.358398	0.000420707	0.00598007	0.0549068	0.743217	0.871676
ENSMUSG00000039395	381269	Mreg	0.408051	0.000421354	0.00598064	-0.240558	0.23813	0.504844
ENSMUSG00000039683	330222	Sdk1	-0.713506	0.000421551	0.00598064	-0.0192242	0.948352	0.978735
ENSMUSG00000004263	13498	Atn1	0.69943	0.000424361	0.00601475	0.352874	0.228219	0.49643
ENSMUSG00000029683	93677	Lmod2	-0.549952	0.000427103	0.00604785	-0.443739	0.0717854	0.310893
ENSMUSG00000073968	101700	Trim68	0.450478	0.000427689	0.00605038	-0.261748	0.113398	0.369157
ENSMUSG00000046345	69576	2310010M20Rik	0.591133	0.000428116	0.00605065	-0.497034	0.0170012	0.173209
ENSMUSG00000040734	333654	Ppp1r13l	0.608229	0.000429695	0.0060629	0.207859	0.44735	0.679068
ENSMUSG00000025278	286940	Flnb	-0.489148	0.000429799	0.0060629	-0.0108337	0.963168	0.984683
ENSMUSG00000067158	12829	Col4a4	-0.483346	0.000431216	0.00607711	-0.228501	0.258578	0.524366
ENSMUSG00000040747	12508	Cd53	-0.690552	0.000435586	0.00612708	-0.565829	0.0227814	0.19619
ENSMUSG00000038058	107607	Nod1	0.368875	0.000441242	0.00620077	0.437794	0.0504899	0.270622
ENSMUSG00000050345	214639	4930486L24Rik	-0.805434	0.00044174	0.0062019	-0.474038	0.0335007	0.226513
ENSMUSG00000031209	15203	Heph	-0.588554	0.000442925	0.00621266	-0.260157	0.159396	0.426677
ENSMUSG00000005465	50931	Il27ra	-0.663986	0.000446126	0.00625166	0.0698435	0.8107	0.909342
ENSMUSG00000029093	81840	Sorcs2	0.61624	0.000448089	0.00626758	0.305909	0.301095	0.559994
ENSMUSG00000030754	70349	Copb1	-0.44831	0.000448106	0.00626758	-0.181902	0.176095	0.442717
ENSMUSG00000033863	16601	Klf9	-0.64943	0.00045314	0.00633202	-0.296052	0.0720078	0.310896
ENSMUSG00000040537	11496	Adam22	0.540449	0.000453732	0.00633433	-0.321826	0.0330532	0.2256
ENSMUSG00000033184	66676	Tmed7	-0.480501	0.000456874	0.00637221	-0.303708	0.17754	0.443822
ENSMUSG00000029162	16548	Khk	0.588838	0.000459123	0.00639757	0.697418	0.0158273	0.167894
ENSMUSG00000041180	226098	Hectd2	-0.67725	0.000460893	0.00641021	-0.244474	0.22367	0.491134
ENSMUSG00000022280	30945	Rnf19a	-0.477621	0.000462326	0.00642412	-0.321989	0.0274675	0.212569
ENSMUSG00000043131	232157	Mob1a	-0.476162	0.000466408	0.00647478	-0.324897	0.0270258	0.211242
ENSMUSG00000020844	18230	Nxn	-0.475325	0.000471373	0.00653761	-0.0265068	0.900132	0.954896
ENSMUSG00000004462	70573	Tbccd1	0.463897	0.000475005	0.00657569	0.225081	0.13659	0.397586
ENSMUSG00000024168	407831	Tmem204	-0.54431	0.000474856	0.00657569	0.335492	0.0512228	0.272576
ENSMUSG00000013236	19280	Ptprs	0.435394	0.000479728	0.0066349	0.461915	0.0302288	0.219317
ENSMUSG00000060862	230848	Zbtb40	0.525382	0.000483548	0.00668151	0.34623	0.0757366	0.316768
ENSMUSG00000026159	15463	Agfg1	-0.455514	0.000484901	0.00668776	-0.319025	0.0707331	0.30868
ENSMUSG00000031111	209268	Igsf1	-0.509091	0.000484846	0.00668776	0.94115	9.64e-07	0.000154127
ENSMUSG00000024659	16952	Anxa1	-0.569354	0.00048953	0.00674534	-0.565554	0.00542853	0.102456
ENSMUSG00000032501	211770	Trib1	-0.783693	0.000490176	0.00674799	-0.387697	0.161309	0.428103
ENSMUSG00000074748	382423	Atxn7l3b	-0.40231	0.000491802	0.0067641	-0.0892207	0.426899	0.664519
ENSMUSG00000020949	30795	Fkbp3	-0.435329	0.000492812	0.00676752	-0.107552	0.609268	0.791369
ENSMUSG00000048787	233805	Dcun1d3	-0.496043	0.000493417	0.00676752	-0.145256	0.337777	0.593214
ENSMUSG00000022440	72709	C1qtnf6	-0.630632	0.000498256	0.00682757	0.323406	0.258593	0.524366
ENSMUSG00000022548	11815	Apod	0.743077	0.000500914	0.00685768	0.0713127	0.785994	0.895761
ENSMUSG00000027253	228357	Lrp4	0.412049	0.000507094	0.00693432	1.31779	8.21e-16	5.97e-13
ENSMUSG00000029207	11787	Apbb2	0.346803	0.000507446	0.00693432	-0.230186	0.0710865	0.309206
ENSMUSG00000026854	74270	Usp20	0.44396	0.000509143	0.0069397	0.325668	0.146616	0.410974
ENSMUSG00000039156	116873	Stim2	-0.434236	0.000508801	0.0069397	-0.379227	0.0460547	0.260404
ENSMUSG00000038801	338417	Scgb1c1	-0.887922	0.000509241	0.0069397	0.710745	0.0177752	0.17655
ENSMUSG00000023092	14199	Fhl1	-0.467827	0.000509872	0.00694192	0.914509	6.31e-07	0.000105549
ENSMUSG00000041115	245666	Iqsec2	0.637387	0.000511787	0.00696161	0.476084	0.0187727	0.180127
ENSMUSG00000034936	80981	Arl4d	-0.611133	0.00051331	0.00697595	-0.0948522	0.61287	0.793216
ENSMUSG00000058488	16591	Kl	-0.935293	0.00051561	0.00700079	0.0251807	0.927722	0.968185
ENSMUSG00000024006	106504	Stk38	-0.390122	0.000518935	0.00703629	0.00338343	0.984022	0.993717
ENSMUSG00000049092	70713	Gpr137c	0.609841	0.000519645	0.00703629	-0.0262938	0.884416	0.946896
ENSMUSG00000042567	674895	Nek10	-0.971451	0.000519535	0.00703629	0.609462	0.0420357	0.251042
ENSMUSG00000046714	14234	Foxc2	-0.793819	0.000521311	0.00705242	-0.36035	0.156635	0.423337
ENSMUSG00000040896	56543	Kcnd3	0.520545	0.00052304	0.00706297	0.21439	0.168947	0.435839
ENSMUSG00000050192	208691	Eif5a2	-0.636594	0.000523042	0.00706297	-0.394822	0.0551677	0.281921
ENSMUSG00000090394	67647	4930523C07Rik	-0.591604	0.000531684	0.00716663	0.0834011	0.596099	0.78204
ENSMUSG00000024302	13527	Dtna	-0.387529	0.000534005	0.00717838	-0.325534	0.0344617	0.229335
ENSMUSG00000044674	14362	Fzd1	-0.53935	0.000533119	0.00717838	-0.348608	0.0424698	0.251629
ENSMUSG00000032657	68521	Fam189b	0.744888	0.000533672	0.00717838	0.264282	0.370967	NA
ENSMUSG00000014164	100503085	Klhl3	0.771047	0.000535098	0.00718008	0.399523	0.10988	0.36477
ENSMUSG00000022836	107589	Mylk	-0.462037	0.000535723	0.00718198	-0.0347122	0.806747	0.906672
ENSMUSG00000024063	77889	Lbh	-0.476161	0.000537363	0.00719747	-0.497213	0.00172906	0.0562968
ENSMUSG00000046491	69183	C1qtnf2	-0.706486	0.000537923	0.00719847	0.00173064	0.995358	0.997619
ENSMUSG00000018920	66102	Cxcl16	-0.533417	0.000541661	0.00723639	-0.332157	0.124974	0.382117
ENSMUSG00000054752	319636	Fsd1l	-0.471704	0.000541731	0.00723639	-0.0872651	0.69865	0.844925
ENSMUSG00000049076	78618	Acap2	-0.422548	0.000545499	0.00726746	-0.390165	0.0352264	0.231148
ENSMUSG00000036473	224617	Tbc1d24	0.41854	0.000545524	0.00726746	-0.00264384	0.987006	0.994458
ENSMUSG00000070814	321008	6330408A02Rik	0.534589	0.000544972	0.00726746	0.0382623	0.799329	0.902404
ENSMUSG00000038390	14788	Gpr162	0.646035	0.000554915	0.00737933	0.147171	0.621732	0.799467
ENSMUSG00000037010	30878	Apln	-0.947381	0.000555989	0.007387	0.212354	0.430265	0.666893
ENSMUSG00000063849	66812	Ppcdc	0.557096	0.000559824	0.0074313	0.247755	0.247399	0.51488
ENSMUSG00000067586	13610	S1pr3	-0.650844	0.000564523	0.00748699	0.108412	0.636432	0.80846
ENSMUSG00000017817	59091	Jph2	-0.49281	0.000566468	0.00750608	0.490807	0.0381012	0.240158
ENSMUSG00000052534	18514	Pbx1	0.49685	0.000571231	0.00756245	-0.200275	0.218051	0.485985
ENSMUSG00000007041	114584	Clic1	-0.589099	0.000574055	0.00759307	0.162109	0.50342	0.719063
ENSMUSG00000026020	55989	Nop58	-0.46579	0.000574752	0.00759553	-0.180279	0.257775	0.523902
ENSMUSG00000045114	69017	Prrt2	0.945707	0.000575648	0.0076006	0.0196935	0.911278	NA
ENSMUSG00000051550	68490	Zfp579	0.621567	0.000576393	0.00760367	0.247866	0.323785	0.58027
ENSMUSG00000029591	22256	Ung	-0.564831	0.000578135	0.0076199	-0.273175	0.233026	0.500478
ENSMUSG00000019997	14219	Ctgf	-0.979261	0.000579478	0.00763082	0.251338	0.269874	0.533774
ENSMUSG00000041775	69546	Mapk1ip1	0.453107	0.000580468	0.00763708	0.0695972	0.694234	0.842811
ENSMUSG00000029816	93695	Gpnmb	0.746436	0.000589896	0.00775208	-0.00441214	0.988172	0.994859
ENSMUSG00000041849	239319	Card6	0.566821	0.000590774	0.00775208	-0.14692	0.564177	0.761975
ENSMUSG00000031748	14681	Gnao1	0.434469	0.000594166	0.00778971	-0.166821	0.221324	0.489387
ENSMUSG00000029084	12494	Cd38	-0.553746	0.000597386	0.00782502	-0.736595	0.00242288	0.0680745
ENSMUSG00000001300	13642	Efnb2	-0.449795	0.000600849	0.00786345	-0.330218	0.0606697	0.292236
ENSMUSG00000022205	20024	Sub1	-0.46413	0.000604387	0.00790279	-0.250238	0.261757	0.527646
ENSMUSG00000028996	63954	Rbp7	-0.749107	0.000607422	0.00793548	0.139923	0.518164	0.729392
ENSMUSG00000031451	14456	Gas6	-0.405624	0.000609158	0.00795118	0.254331	0.196463	0.466067
ENSMUSG00000021186	23876	Fbln5	-0.576671	0.000616429	0.00801789	-0.342274	0.0600971	0.291173
ENSMUSG00000022353	211401	Mtss1	0.471736	0.000616139	0.00801789	0.218544	0.233669	0.501302
ENSMUSG00000038773	277250	Kdm3b	0.381786	0.000615633	0.00801789	0.0373699	0.784388	0.89516
ENSMUSG00000061731	14042	Ext1	-0.400565	0.000618379	0.00802919	0.141859	0.233596	0.501302
ENSMUSG00000024317	56515	Rnf138	-0.674208	0.000618071	0.00802919	-0.337956	0.151083	0.416688
ENSMUSG00000007476	241296	Lrrc8a	-0.638662	0.000622051	0.00806982	0.0846724	0.707083	0.849206
ENSMUSG00000070044	212326	Fam149a	-0.530701	0.000624948	0.00809794	-0.321792	0.0596735	0.290367
ENSMUSG00000009566	14287	Fpgs	-0.574507	0.000625854	0.00809794	0.145643	0.622839	0.79982
ENSMUSG00000028041	11490	Adam15	-0.536065	0.000625575	0.00809794	-0.0537659	0.831687	0.920176
ENSMUSG00000038708	54214	Golga4	0.32896	0.00062826	0.00811506	-0.202936	0.14446	0.408184
ENSMUSG00000073131	67048	Vma21	-0.5974	0.00062827	0.00811506	-0.125141	0.587192	0.776062
ENSMUSG00000032786	11655	Alas1	-0.412404	0.000631576	0.0081436	0.128306	0.463751	0.691256
ENSMUSG00000073676	15528	Hspe1	-0.533095	0.000632927	0.00814687	-0.563061	0.00449753	0.0940476
ENSMUSG00000038244	320878	Mical2	-0.512159	0.000632879	0.00814687	0.199402	0.332671	0.58837
ENSMUSG00000040877	212198	Wdr25	0.673971	0.000642574	0.00826054	0.345553	0.192682	0.462221
ENSMUSG00000035936	214579	Aldh5a1	0.418692	0.00064287	0.00826054	-0.192103	0.121351	0.377823
ENSMUSG00000018379	110809	Srsf1	-0.387123	0.000644607	0.00826796	-0.2712	0.205771	0.475612
ENSMUSG00000026812	64930	Tsc1	0.379251	0.00064623	0.00826796	0.160584	0.312861	0.569765
ENSMUSG00000028226	17389	Mmp16	-0.618399	0.000644043	0.00826796	-0.384775	0.0744526	0.314721
ENSMUSG00000024712	54391	Rfk	-0.481475	0.000645846	0.00826796	-0.374218	0.0291952	0.216339
ENSMUSG00000028584	242735	Lrrc38	0.74953	0.000647091	0.00827185	0.289849	0.296894	0.556015
ENSMUSG00000031776	107566	Arl2bp	-0.369915	0.000648195	0.00827884	-0.208763	0.183931	0.45165
ENSMUSG00000000776	67065	Polr3d	-0.446405	0.000649708	0.00828391	0.143115	0.439774	0.674041
ENSMUSG00000034591	338365	Slc41a2	-0.686534	0.000650469	0.00828651	-0.108765	0.653332	0.818366
ENSMUSG00000032718	67729	Mansc1	0.536177	0.000652376	0.00830367	0.0415262	0.839493	0.923645
ENSMUSG00000079426	68089	Arpc4	-0.410944	0.00065384	0.00831335	0.154373	0.476792	0.701145
ENSMUSG00000093668	75507	Pou5f2	0.922086	0.000654255	0.00831335	-0.00595481	0.981494	NA
ENSMUSG00000052565	14957	Hist1h1d	0.663128	0.000657176	0.00834333	0.157084	0.506957	NA
ENSMUSG00000040528	380732	Gm885	-0.96923	0.000659551	0.00836633	0.0117213	0.968406	0.987802
ENSMUSG00000051650	53625	B3gnt2	-0.449425	0.000664924	0.00841293	0.0160741	0.903407	NA
ENSMUSG00000078578	66105	Ube2d3	-0.614027	0.000664439	0.00841293	-0.429142	0.0658761	0.300741
ENSMUSG00000057604	30937	Lmcd1	-0.738948	0.000664293	0.00841293	-0.577362	0.0334369	0.22645
ENSMUSG00000027848	99543	Olfml3	-0.474428	0.000670839	0.00848029	0.101773	0.604361	0.788239
ENSMUSG00000018736	83431	Ndel1	-0.335785	0.000671389	0.00848029	-0.158956	0.166539	0.43321
ENSMUSG00000076432	22630	Ywhaq	-0.604504	0.000673683	0.00850203	-0.391156	0.0211371	0.190364
ENSMUSG00000048612	226101	Myof	-0.429972	0.000676477	0.00852399	-0.483829	0.0108943	0.142485
ENSMUSG00000070570	72961	Slc17a7	0.46314	0.000676571	0.00852399	0.782978	0.000685865	0.0306948
ENSMUSG00000003378	14809	Grik5	0.570825	0.000680487	0.00856606	0.182624	0.53989	0.744293
ENSMUSG00000031467	52123	Agpat5	-0.490828	0.000681133	0.00856694	0.0416916	0.817072	0.912739
ENSMUSG00000053475	21930	Tnfaip6	-0.768093	0.000682791	0.00857327	-0.163445	0.516788	0.728601
ENSMUSG00000036905	12260	C1qb	-0.568082	0.000682714	0.00857327	0.0343005	0.897517	0.953882
ENSMUSG00000026335	18484	Pam	0.297618	0.000690971	0.00866134	0.237449	0.102423	0.355938
ENSMUSG00000030996	11870	Art1	0.378552	0.000693077	0.00868041	1.05385	1.51e-06	0.000224781
ENSMUSG00000069833	66395	Ahnak	-0.399126	0.000694286	0.00868823	-0.382165	0.0623015	0.293818
ENSMUSG00000031274	12830	Col4a5	-0.375206	0.00069531	0.00869371	-0.128314	0.551969	0.753598
ENSMUSG00000034303	245902	Ccdc15	0.598208	0.000701202	0.00876001	-0.217429	0.244027	0.511238
ENSMUSG00000024091	30960	Vapa	-0.398744	0.000703238	0.00877806	-0.325244	0.0697686	0.307794
ENSMUSG00000028098	67845	Rnf115	-0.457349	0.000710174	0.0088572	-0.392768	0.0279382	0.213576
ENSMUSG00000031295	110094	Phka2	0.386943	0.000720363	0.00896921	0.569856	0.00293831	0.0745021
ENSMUSG00000039497	212898	Dse	-0.417545	0.000719973	0.00896921	0.00470241	0.975438	0.99034
ENSMUSG00000030064	232288	Frmd4b	-0.409158	0.000726259	0.00903505	-0.475038	0.00212982	0.0630893
ENSMUSG00000062127	80281	Cttnbp2nl	-0.572041	0.000731989	0.00908351	-0.293648	0.138801	0.400419
ENSMUSG00000028982	70556	Slc25a33	-0.546617	0.000731896	0.00908351	-0.485538	0.00101954	0.0399039
ENSMUSG00000058927	13063	Gm10053	-0.696465	0.000731971	0.00908351	-0.096289	0.453705	NA
ENSMUSG00000063694	13063	Cycs	-0.696465	0.000731971	0.00908351	-0.452768	0.0671794	0.302609
ENSMUSG00000027082	21788	Tfpi	-0.359582	0.000734284	0.00910439	-0.113119	0.491843	0.710146
ENSMUSG00000027175	320554	Tcp11l1	0.636883	0.00074079	0.0091774	-0.149629	0.491704	0.710134
ENSMUSG00000033308	99586	Dpyd	0.444998	0.000746596	0.00924162	0.123504	0.448958	0.680154
ENSMUSG00000067081	208372	Asb18	0.55521	0.000748487	0.0092496	0.171333	0.458853	0.688093
ENSMUSG00000001763	232670	Tspan33	0.758814	0.00074842	0.0092496	0.380072	0.204061	0.475304
ENSMUSG00000046794	244416	Ppp1r3b	0.554888	0.000754746	0.0093192	0.404885	0.00533395	0.101686
ENSMUSG00000029672	27999	Fam3c	-0.396813	0.000759791	0.0093737	-0.357923	0.029105	0.216303
ENSMUSG00000028261	68493	Ndufaf4	-0.479946	0.000762769	0.00940263	-0.437369	0.0437471	0.254678
ENSMUSG00000029465	56378	Arpc3	-0.43169	0.000765393	0.00942715	0.122651	0.448344	0.679779
ENSMUSG00000020261	215335	Slc36a1	0.494777	0.000766974	0.0094388	0.121481	0.599007	0.784298
ENSMUSG00000002885	26364	Cd97	-0.384391	0.000771237	0.00948341	0.181226	0.432499	0.668693
ENSMUSG00000036292	207798	Gramd1c	0.743087	0.00077329	0.00950079	0.126988	0.568555	0.764262
ENSMUSG00000031668	13666	Eif2ak3	-0.40598	0.000774768	0.00951107	-0.129989	0.403525	0.647605
ENSMUSG00000044534	59289	Ccbp2	-0.692625	0.000776097	0.00951953	-0.585354	0.0331199	0.2256
ENSMUSG00000020728	76380	Ccdc46	0.600399	0.000779783	0.00955685	-0.420625	0.00858116	0.127194
ENSMUSG00000031595	68797	Pdgfrl	-0.640904	0.000781721	0.0095727	0.0799039	0.738291	0.869164
ENSMUSG00000055067	69726	Smyd3	0.50569	0.000785213	0.00960754	0.136208	0.364495	0.616784
ENSMUSG00000006373	53328	Pgrmc1	-0.434184	0.000786835	0.00961155	-0.513419	0.0140897	0.159519
ENSMUSG00000037989	75607	Wnk2	0.565712	0.000786524	0.00961155	0.107944	0.594714	0.781683
ENSMUSG00000054320	270091	Lrrc36	0.847021	0.000789218	0.00962483	0.264351	0.377547	0.627621
ENSMUSG00000028369	64817	Svep1	-0.588015	0.00078891	0.00962483	-0.335556	0.262984	0.528437
ENSMUSG00000066235	215494	C85492	0.458474	0.000790452	0.00963197	0.47011	0.0418787	0.250515
ENSMUSG00000087651	69784	1500009L16Rik	-0.912207	0.000793388	0.00965982	-0.0787654	0.775709	0.890675
ENSMUSG00000047735	209086	Samd9l	-0.496648	0.000797433	0.00970112	-0.373587	0.0865534	0.332637
ENSMUSG00000030245	66964	Golt1b	-0.438452	0.000798251	0.00970312	-0.0515177	0.706745	0.849167
ENSMUSG00000041057	72515	Wdr43	-0.394946	0.000802161	0.00974268	-0.148054	0.260446	0.526256
ENSMUSG00000032175	54721	Tyk2	0.474331	0.000805973	0.00978099	0.693453	0.00335922	0.0806768
ENSMUSG00000018659	103711	Pnpo	0.420164	0.000807716	0.00979414	0.780887	0.00069506	0.0308412
ENSMUSG00000019920	110829	Lims1	-0.324284	0.000811141	0.00982764	-0.384756	0.0822857	0.326276
ENSMUSG00000025196	93721	Cpn1	0.932688	0.000812664	0.00983806	-0.551776	0.0434157	NA
ENSMUSG00000047565	64833	Acot10	-0.618352	0.000815456	0.00984779	-0.36648	0.084327	NA
ENSMUSG00000020116	66249	Pno1	-0.436446	0.00081489	0.00984779	-0.356832	0.0593564	0.289747
ENSMUSG00000031342	14758	Gpm6b	-0.606888	0.000815173	0.00984779	-0.316975	0.11317	0.368994
ENSMUSG00000035725	19108	Prkx	-0.425433	0.000818175	0.0098726	-0.188625	0.12526	0.38247
ENSMUSG00000040152	21825	Thbs1	-0.949216	0.000833163	0.0100371	-0.471935	0.0435757	0.254348
ENSMUSG00000024691	107373	Fam111a	-0.507816	0.000832523	0.0100371	-0.459665	0.0149786	0.16349
ENSMUSG00000043300	26879	B3galnt1	-0.580893	0.000841776	0.0101081	-0.256095	0.259323	0.524968
ENSMUSG00000006435	18011	Neurl1a	0.694212	0.000839765	0.0101081	0.812441	0.00629083	0.109263
ENSMUSG00000002881	17936	Nab1	-0.374391	0.000840786	0.0101081	-0.447308	0.0170369	0.173209
ENSMUSG00000025407	14632	Gli1	0.79131	0.000841489	0.0101081	0.823335	0.00424157	NA
ENSMUSG00000030447	20430	Cyfip1	-0.409187	0.000843577	0.0101216	-0.290586	0.0210931	0.190102
ENSMUSG00000044813	230126	Shb	-0.55738	0.00084516	0.0101324	-0.294148	0.172762	0.439128
ENSMUSG00000040841	20475	Six5	0.549536	0.000846791	0.0101437	0.290052	0.153872	0.419216
ENSMUSG00000050954	67911	Zfp169	0.577513	0.00084932	0.0101658	0.0309674	0.884097	0.94674
ENSMUSG00000001847	19353	Rac1	-0.391269	0.000858703	0.0102699	-0.210185	0.0985426	0.349662
ENSMUSG00000032815	14087	Fanca	0.83795	0.000863427	0.0103181	0.122195	0.677263	NA
ENSMUSG00000009739	19009	Pou6f1	0.458553	0.00086487	0.010327	0.257405	0.314022	0.571213
ENSMUSG00000045103	13405	Dmd	0.400099	0.00086629	0.0103356	-0.159832	0.325569	0.58242
ENSMUSG00000053279	11668	Aldh1a1	-0.551661	0.000868477	0.0103534	-0.447059	0.040709	0.246148
ENSMUSG00000022661	17470	Cd200	-0.381234	0.000871603	0.0103823	-0.541392	0.0030239	0.0761415
ENSMUSG00000020601	217410	Trib2	-0.475183	0.000873168	0.0103927	-0.21821	0.18065	0.447476
ENSMUSG00000023886	64074	Smoc2	-0.671779	0.000876181	0.0104202	-0.11544	0.610943	0.792484
ENSMUSG00000017167	53321	Cntnap1	0.558191	0.000877278	0.0104249	0.0353183	0.900162	0.954896
ENSMUSG00000040387	212390	Klhl32	0.718491	0.00088927	0.0105589	0.294541	0.207869	0.476353
ENSMUSG00000052681	215449	Rap1b	-0.57132	0.000892302	0.0105865	-0.32572	0.10045	0.352361
ENSMUSG00000027162	22343	Lin7c	-0.455008	0.000893298	0.0105898	-0.425943	0.0421832	0.251303
ENSMUSG00000022607	14083	Ptk2	-0.379601	0.000897937	0.0106363	-0.186294	0.0952478	0.345954
ENSMUSG00000022010	21807	Tsc22d1	-0.378058	0.000909003	0.0107588	-0.0569542	0.712742	0.853053
ENSMUSG00000040472	56187	Rabggta	0.450168	0.000915744	0.01083	0.66567	0.00477594	0.0957425
ENSMUSG00000079018	17067	Ly6c1	-0.433267	0.000919675	0.0108635	0.28095	0.209381	0.477743
ENSMUSG00000022912	19128	Pros1	-0.43159	0.000920045	0.0108635	-0.354522	0.0411445	0.247343
ENSMUSG00000063952	268936	Brpf3	0.543277	0.000923048	0.0108903	-0.105497	0.655663	0.819951
ENSMUSG00000022270	66270	Fam134b	-0.545988	0.00092474	0.0109017	-0.403955	0.0579298	0.287421
ENSMUSG00000019951	75089	Uhrf1bp1l	-0.434313	0.000930379	0.0109334	-0.267124	0.122018	0.378055
ENSMUSG00000029622	434782	Arpc1b	-0.687951	0.000930364	0.0109334	-0.45156	0.0464566	0.261525
ENSMUSG00000040761	56381	Spen	0.509986	0.000929439	0.0109334	0.154658	0.472125	0.697678
ENSMUSG00000045039	269878	Megf8	0.464477	0.000952412	0.0111658	0.192807	0.252345	0.519613
ENSMUSG00000020585	17775	Laptm4a	-0.325152	0.000951941	0.0111658	-0.0861438	0.517458	0.728979
ENSMUSG00000022211	268747	Lrrc16b	0.756897	0.000955098	0.0111885	0.0515534	0.84115	NA
ENSMUSG00000042050	217935	Wdr60	-0.605165	0.000962202	0.0112602	-0.252826	0.140467	0.4032
ENSMUSG00000036112	56307	Metap2	-0.408072	0.000963073	0.0112602	-0.19985	0.197911	0.467831
ENSMUSG00000042390	229542	Gatad2b	0.616857	0.000963491	0.0112602	0.208197	0.403264	0.647522
ENSMUSG00000037685	11980	Atp8a1	0.426512	0.000966383	0.0112713	0.216288	0.116997	0.373172
ENSMUSG00000001305	67223	Rrp15	-0.555778	0.00096672	0.0112713	0.208088	0.219014	0.486877
ENSMUSG00000006522	16426	Itih3	0.820031	0.00096664	0.0112713	-0.0746005	0.803527	0.904115
ENSMUSG00000033066	14457	Gas7	-0.501729	0.000969528	0.0112952	0.0452017	0.8255	0.916984
ENSMUSG00000036120	19727	Rfxank	-0.568715	0.000976748	0.011326	-0.0300728	0.911826	0.959891
ENSMUSG00000064061	224170	Dzip3	-0.440953	0.000973109	0.011326	-0.141302	0.516636	0.728596
ENSMUSG00000037341	236727	Slc9a7	0.486831	0.000974642	0.011326	-0.309375	0.105967	0.360298
ENSMUSG00000040254	108151	Sema3d	-0.626408	0.000974546	0.011326	-0.739975	0.00547229	0.102456
ENSMUSG00000071342	380755	Gm889	0.46186	0.000975294	0.011326	0.598273	0.0051972	0.100148
ENSMUSG00000041040	72750	Fam117b	-0.617547	0.000976651	0.011326	-0.269701	0.124668	0.381982
ENSMUSG00000074656	100040220	Eif2s2	-0.530816	0.000980813	0.0113643	-0.0962435	0.524182	0.733764
ENSMUSG00000043323	381668	Fbrsl1	0.440369	0.000981828	0.0113672	0.12049	0.5671	0.763512
ENSMUSG00000026648	227525	Dclre1c	0.5524	0.000982744	0.0113689	-0.0769312	0.707742	0.849592
ENSMUSG00000027134	99010	Lpcat4	-0.707847	0.000989886	0.0114426	0.230107	0.420217	NA
ENSMUSG00000058571	23888	Gpc6	-0.457002	0.000994383	0.0114857	-0.149277	0.569977	0.764963
ENSMUSG00000028552	13858	Eps15	-0.42521	0.000998789	0.0115186	-0.280035	0.106811	0.361408
ENSMUSG00000060063	11690	Alox5ap	-0.659426	0.00099859	0.0115186	-0.183287	0.4953	0.713157
ENSMUSG00000048582	14611	Gja3	0.473285	0.00100245	0.0115481	0.204792	0.424796	0.662981
ENSMUSG00000022822	27416	Abcc5	0.40984	0.0010029	0.0115481	0.305087	0.164766	0.43184
ENSMUSG00000021884	56794	Hacl1	0.484757	0.00100464	0.0115503	0.136929	0.37735	0.627364
ENSMUSG00000009905	70750	Kdsr	-0.494371	0.00100719	0.0115706	-0.542801	0.00290165	0.0738297
ENSMUSG00000024352	71242	Spata24	0.638243	0.00101892	0.0116864	0.592476	0.0126143	0.152341
ENSMUSG00000035245	101351	A130022J15Rik	-0.445608	0.0010181	0.0116864	-0.0833634	0.558489	0.75809
ENSMUSG00000053985	243906	Zfp14	0.575299	0.00101963	0.0116864	0.21256	0.316769	0.573558
ENSMUSG00000021091	20716	Serpina3n	0.885292	0.00102041	0.0116864	0.133804	0.531093	0.738508
ENSMUSG00000021823	22330	Vcl	-0.402144	0.00102316	0.0117088	0.20124	0.166813	0.433461
ENSMUSG00000049411	338363	6030446N20Rik	0.6004	0.0010247	0.0117174	-0.141614	0.408729	0.651966
ENSMUSG00000017831	271457	Rab5a	-0.383552	0.0010269	0.0117335	-0.332145	0.0548264	0.280966
ENSMUSG00000033565	93686	Rbfox2	0.320175	0.00102883	0.0117375	0.0689375	0.506567	0.721528
ENSMUSG00000067818	98932	Myl9	-0.905836	0.00102824	0.0117375	0.570329	0.0210913	0.190102
ENSMUSG00000037788	232023	Vopp1	-0.370264	0.00102974	0.0117389	-0.099455	0.450862	0.681521
ENSMUSG00000030782	21804	Tgfb1i1	-0.553611	0.00103616	0.011803	-0.107019	0.648453	0.815202
ENSMUSG00000034981	231440	Parm1	0.311381	0.00104773	0.0119256	0.305311	0.0393811	0.24252
ENSMUSG00000026377	67949	Mki67ip	-0.422517	0.00105304	0.0119769	0.0515154	0.719035	0.857039
ENSMUSG00000068798	109905	Rap1a	-0.453279	0.00105939	0.0120399	-0.269083	0.241162	0.508015
ENSMUSG00000000078	23849	Klf6	-0.628959	0.0010629	0.0120635	-0.413239	0.0609711	0.292236
ENSMUSG00000035372	72056	1810055G02Rik	-0.537716	0.00106661	0.0120943	0.432267	0.11357	0.369188
ENSMUSG00000005667	17768	Mthfd2	0.596955	0.00107073	0.0121317	-0.645158	0.00628098	0.109263
ENSMUSG00000024331	13506	Dsc2	0.383106	0.00107878	0.0122136	-0.311101	0.087232	0.333735
ENSMUSG00000000278	74617	Scpep1	-0.380942	0.00108174	0.0122284	-0.0522566	0.727459	0.861538
ENSMUSG00000058297	94214	Spock2	0.55686	0.00108163	0.0122284	0.38862	0.0319452	0.223099
ENSMUSG00000048960	109294	Prex2	-0.365844	0.0010918	0.0123327	-0.341528	0.0629766	0.295098
ENSMUSG00000000787	13205	Ddx3x	-0.594061	0.0010972	0.0123844	-0.379107	0.0309696	0.220622
ENSMUSG00000051223	66882	Bzw1	-0.36277	0.001101	0.0124178	-0.239763	0.139509	0.401745
ENSMUSG00000040687	228355	Madd	0.461671	0.0011036	0.0124377	0.152587	0.515276	0.727666
ENSMUSG00000035863	18483	Palm	-0.460475	0.00110673	0.0124635	-0.347201	0.128974	0.387778
ENSMUSG00000051579	66684	Tceal8	-0.513911	0.00110848	0.0124738	-0.37819	0.080661	0.323489
ENSMUSG00000033526	327655	Ppip5k1	0.444672	0.0011157	0.012536	0.352255	0.0501997	0.270378
ENSMUSG00000024360	225363	Etf1	-0.41477	0.00112097	0.0125857	-0.426072	0.0114583	0.145519
ENSMUSG00000046275	237858	Tusc5	-0.773044	0.0011261	0.0125862	-0.593357	0.0477253	0.264607
ENSMUSG00000007836	77134	Hnrnpa0	-0.398198	0.00112513	0.0125862	-0.234311	0.254919	0.521462
ENSMUSG00000009291	108705	Pttg1ip	-0.335544	0.00112279	0.0125862	-0.153421	0.187802	0.45599
ENSMUSG00000025982	81898	Sf3b1	-0.416633	0.00112364	0.0125862	-0.21835	0.136665	0.397708
ENSMUSG00000030401	20167	Rtn2	0.377113	0.00112364	0.0125862	0.487898	0.0290002	0.216208
ENSMUSG00000021575	11624	Ahrr	0.873024	0.00113651	0.0126834	-0.0453518	0.868811	0.937754
ENSMUSG00000015133	233328	Lrrk1	0.446605	0.0011361	0.0126834	0.503314	0.0309344	0.220588
ENSMUSG00000030433	381836	Sbk2	0.455416	0.00114427	0.0127605	0.379157	0.0471216	0.263114
ENSMUSG00000033191	21846	Tie1	-0.496635	0.00114798	0.0127923	0.00403097	0.983493	0.993717
ENSMUSG00000054920	71778	Klhl5	-0.490935	0.00115048	0.0128105	-0.580573	0.00307189	0.0769506
ENSMUSG00000057123	14613	Gja5	0.461231	0.00115597	0.012862	0.552084	0.00764707	0.119243
ENSMUSG00000022114	24064	Spry2	-0.451	0.00115739	0.0128681	-0.160864	0.408805	0.651966
ENSMUSG00000036585	14164	Fgf1	0.427151	0.00115927	0.0128794	0.302557	0.150644	0.416121
ENSMUSG00000030095	74122	Tmem43	-0.391263	0.00116128	0.0128922	-0.0075819	0.953476	0.980283
ENSMUSG00000025316	53325	Banp	0.651647	0.00116259	0.012897	0.50192	0.00101994	0.0399039
ENSMUSG00000068299	75541	1700019G17Rik	0.655901	0.0011764	0.0130405	0.375935	0.0525602	0.275662
ENSMUSG00000032475	17973	Nck1	-0.375036	0.0011775	0.0130429	-0.449714	0.00274412	0.0718308
ENSMUSG00000021811	108671	Dnajc9	0.46085	0.00118143	0.0130767	-0.00166211	0.99108	0.995794
ENSMUSG00000044934	238673	Zfp367	-0.38932	0.00118978	0.0131495	-0.750733	0.000952338	0.0379608
ENSMUSG00000052997	50995	Uba2	-0.329278	0.00118971	0.0131495	-0.187575	0.177019	0.443354
ENSMUSG00000022773	106369	Ypel1	0.725773	0.001194	0.0131864	0.372702	0.138041	0.399413
ENSMUSG00000054321	72504	Taf4b	-0.495202	0.00119842	0.0132155	-0.17295	0.277883	0.54119
ENSMUSG00000000197	338370	Nalcn	-0.559851	0.00119788	0.0132155	-0.199483	0.37628	0.626445
ENSMUSG00000034109	73124	Golim4	-0.33754	0.00120634	0.0132832	-0.157828	0.283154	0.545542
ENSMUSG00000039518	386463	Cdsn	0.903473	0.00120847	0.0132967	0.0520313	0.800017	NA
ENSMUSG00000046329	66972	Slc25a23	0.358552	0.00121717	0.0133825	0.586306	0.0155237	0.166371
ENSMUSG00000028082	27059	Sh3d19	-0.366973	0.00122583	0.0134678	-0.340189	0.0388851	0.241399
ENSMUSG00000024462	54393	Gabbr1	0.463884	0.00123159	0.0135211	0.106534	0.54139	0.74559
ENSMUSG00000053007	231991	Creb5	-0.591316	0.00123553	0.0135544	-0.445838	0.100841	0.3528
ENSMUSG00000038366	16796	Lasp1	-0.466599	0.00124394	0.0136365	0.00666494	0.974627	0.990052
ENSMUSG00000058441	406218	Panx2	0.624424	0.00125118	0.0137058	0.26692	0.355891	0.610303
ENSMUSG00000032350	14629	Gclc	-0.626586	0.00125267	0.013712	-0.235135	0.0942602	0.344084
ENSMUSG00000064080	14115	Fbln2	-0.521018	0.00126236	0.0138078	0.0250638	0.910298	0.959381
ENSMUSG00000029710	13846	Ephb4	-0.475202	0.00126685	0.0138328	-0.040368	0.822785	0.915739
ENSMUSG00000060802	12010	B2m	-0.50857	0.00126744	0.0138328	-0.269347	0.173547	0.439894
ENSMUSG00000057337	53374	Chst3	-0.795173	0.001272	0.0138725	0.53917	0.0580215	0.287421
ENSMUSG00000079144	319266	A130010J15Rik	0.604017	0.0012823	0.0139745	-0.0588062	0.732278	0.865092
ENSMUSG00000030876	59052	Mettl9	-0.368844	0.00128329	0.0139751	-0.246474	0.204583	0.475304
ENSMUSG00000007827	232339	Ankrd26	0.485314	0.00128565	0.0139905	0.0190351	0.907959	0.95847
ENSMUSG00000018167	59045	Stard3	0.471501	0.00129492	0.014081	0.759983	0.000892131	0.036573
ENSMUSG00000015766	13860	Eps8	-0.431859	0.00129698	0.0140931	0.0124358	0.938421	0.974372
ENSMUSG00000037355	71101	4933407H18Rik	0.448492	0.0013005	0.014121	-0.184493	0.353091	0.608152
ENSMUSG00000008845	93671	Cd163	-0.476137	0.001302	0.0141271	-0.448339	0.0460292	0.260361
ENSMUSG00000022533	224088	Atp13a3	-0.51184	0.00130657	0.0141663	-0.351033	0.0526418	0.275791
ENSMUSG00000038416	69957	Cdc16	-0.388127	0.00131147	0.014209	0.144297	0.142903	0.406373
ENSMUSG00000026238	19231	Ptma	-0.436193	0.00131573	0.0142448	-0.607662	0.0157715	0.167546
ENSMUSG00000006930	15114	Hap1	0.683045	0.00132835	0.0143673	0.250247	0.403887	0.647733
ENSMUSG00000052040	50794	Klf13	-0.486215	0.00132898	0.0143673	-0.118547	0.516274	0.728342
ENSMUSG00000052459	11964	Atp6v1a	-0.374212	0.00133082	0.0143767	-0.241531	0.11804	0.37415
ENSMUSG00000036661	105841	Dennd3	-0.592207	0.00133815	0.014442	0.120382	0.655706	0.819951
ENSMUSG00000020361	15525	Hspa4	-0.355786	0.0013388	0.014442	-0.143082	0.357979	0.611531
ENSMUSG00000055775	17885	Myh8	-0.863975	0.00133989	0.0144432	0.963888	0.000941401	0.0378485
ENSMUSG00000039781	12009	Azi1	0.513844	0.0013489	0.0145256	0.495378	0.0973109	0.348318
ENSMUSG00000028719	66588	Cmpk1	-0.480795	0.00135046	0.0145256	-0.41292	0.0528204	0.276429
ENSMUSG00000015217	15354	Hmgb3	-0.572503	0.00134967	0.0145256	-0.0900626	0.601336	0.785765
ENSMUSG00000040690	107581	Col16a1	-0.489275	0.0013545	0.0145585	-0.294404	0.261368	0.527356
ENSMUSG00000003200	20405	Sh3gl1	-0.402123	0.00136117	0.0146196	0.121863	0.636278	0.808344
ENSMUSG00000022949	209195	Clic6	0.820492	0.00136893	0.0146923	-0.490423	0.0594123	0.289747
ENSMUSG00000021127	12192	Zfp36l1	0.454278	0.00137106	0.0147045	-0.541082	0.00546439	0.102456
ENSMUSG00000038970	231876	Lmtk2	0.338664	0.00138812	0.0148767	0.16454	0.161587	0.428221
ENSMUSG00000047139	12484	Cd24a	-0.558464	0.00138997	0.0148858	0.310134	0.112508	0.367883
ENSMUSG00000014905	27362	Dnajb9	-0.455338	0.00139528	0.0149268	-0.385098	0.0635608	0.296234
ENSMUSG00000034312	232227	Iqsec1	0.486765	0.00139581	0.0149268	0.0177437	0.892548	0.95124
ENSMUSG00000061533	75216	4930534B04Rik	0.466799	0.00140688	0.0150158	-0.492968	0.00319174	0.078335
ENSMUSG00000025217	12234	Btrc	0.395277	0.00140716	0.0150158	0.161302	0.279105	0.542248
ENSMUSG00000028524	73094	Sgip1	0.78617	0.00140667	0.0150158	-0.243484	0.353393	0.608285
ENSMUSG00000024098	65960	Twsg1	-0.357889	0.00141074	0.0150432	-0.533101	0.00772338	0.119623
ENSMUSG00000019278	13479	Dpep1	-0.582779	0.00141987	0.0151297	-0.189057	0.425035	0.662981
ENSMUSG00000031503	12827	Col4a2	-0.582099	0.00142422	0.0151652	0.325192	0.0839868	0.327767
ENSMUSG00000030224	20901	Strap	-0.315813	0.0014291	0.0152038	-0.303456	0.103883	0.357932
ENSMUSG00000024260	269003	Sap130	0.403302	0.0014299	0.0152038	0.322141	0.170267	0.437048
ENSMUSG00000029063	192185	Nadk	-0.405081	0.00143256	0.0152213	0.0273157	0.850233	0.929071
ENSMUSG00000020078	30930	Vps26a	-0.331921	0.00144058	0.0152955	-0.0866194	0.61182	0.792915
ENSMUSG00000025287	56360	Acot9	-0.427252	0.00144189	0.0152985	-0.0373153	0.788736	0.89669
ENSMUSG00000001017	66511	2500003M10Rik	-0.31482	0.00145236	0.0153986	-0.307519	0.0606032	0.292236
ENSMUSG00000027660	20482	Skil	-0.482994	0.00145824	0.0154499	-0.444476	0.0223857	0.195321
ENSMUSG00000074802	237436	Gas2l3	-0.698457	0.00146196	0.0154749	-0.385563	0.0727899	0.312305
ENSMUSG00000004085	65964	B230120H23Rik	0.345569	0.00146269	0.0154749	-0.0648333	0.625401	0.80106
ENSMUSG00000005886	17978	Ncoa2	0.383076	0.00146837	0.015524	-0.235067	0.144496	0.408184
ENSMUSG00000078716	242409	Tmem8b	0.402494	0.00147046	0.015535	0.507199	0.017028	0.173209
ENSMUSG00000020847	380714	Rph3al	0.674299	0.00147502	0.0155721	-0.194479	0.453611	0.683776
ENSMUSG00000035506	171286	Slc12a8	-0.831752	0.0014773	0.0155851	-0.0328936	0.912156	0.959977
ENSMUSG00000022285	22631	Ywhaz	-0.450424	0.00148172	0.0156206	-0.370254	0.0210703	0.190102
ENSMUSG00000079037	19122	Prnp	-0.358199	0.00148828	0.0156786	-0.218233	0.134539	0.394601
ENSMUSG00000030465	234353	Psd3	0.471114	0.00148994	0.0156819	-0.320468	0.0619927	0.293365
ENSMUSG00000022371	12818	Col14a1	-0.618631	0.0014907	0.0156819	-0.247945	0.255678	0.521634
ENSMUSG00000003531	13353	Dgcr6	0.383544	0.00149275	0.0156924	0.535615	0.0574639	0.28661
ENSMUSG00000049907	68939	Rasl11b	-0.54173	0.00149966	0.0157488	-0.409649	0.171648	0.438126
ENSMUSG00000034066	227377	Farp2	0.422042	0.00150996	0.0158396	0.412943	0.0308111	0.220588
ENSMUSG00000054277	66251	Arfgap3	-0.351706	0.00152054	0.0159394	-0.334311	0.0387113	0.241399
ENSMUSG00000019843	14360	Fyn	-0.382561	0.00152262	0.0159499	-0.286716	0.0157058	0.167214
ENSMUSG00000030030	71837	1700003E16Rik	0.777308	0.00152382	0.0159513	0.124237	0.674619	NA
ENSMUSG00000030470	13009	Csrp3	-0.426288	0.00153139	0.0159967	-0.0137582	0.950314	0.979454
ENSMUSG00000041747	105372	Utp15	-0.41343	0.00152943	0.0159967	0.00756266	0.957727	0.982294
ENSMUSG00000027996	20319	Sfrp2	-0.697763	0.00154491	0.016126	-0.171312	0.557632	0.757878
ENSMUSG00000024511	80718	Rab27b	-0.570687	0.00154594	0.016126	0.0196013	0.927794	0.968185
ENSMUSG00000033253	230676	Szt2	0.468206	0.00155608	0.0162204	0.500607	0.0384694	0.241399
ENSMUSG00000020363	14584	Gfpt2	-0.57999	0.00156632	0.0163157	-0.273886	0.261684	0.527645
ENSMUSG00000044461	219134	Shisa2	0.60558	0.0015706	0.0163487	1.409	5.63e-11	2.48e-08
ENSMUSG00000018143	17135	Mafk	-0.598188	0.00157738	0.0164078	-0.555808	0.0170894	0.173209
ENSMUSG00000035284	320528	Vps13c	0.45786	0.00161595	0.0167973	-0.187735	0.343194	0.598278
ENSMUSG00000089989	14256	Flt3l	0.593718	0.00162192	0.0168475	0.300891	0.198415	0.468354
ENSMUSG00000041119	18585	Pde9a	0.507167	0.00162365	0.0168538	0.199419	0.464822	0.691922
ENSMUSG00000039578	232035	Fam190a	0.660311	0.00162781	0.0168851	0.474907	0.0341804	0.229056
ENSMUSG00000021245	217716	Mlh3	0.432961	0.00164153	0.0170036	-0.00390863	0.975433	0.99034
ENSMUSG00000043943	72560	Naalad2	-0.507836	0.0016414	0.0170036	-0.219425	0.304786	0.562481
ENSMUSG00000033618	71751	Map3k13	0.621114	0.00164348	0.017012	0.101536	0.674713	0.831287
ENSMUSG00000010047	15587	Hyal2	-0.530355	0.00164866	0.0170419	0.0217575	0.92718	0.968185
ENSMUSG00000029415	231452	Sdad1	-0.40628	0.0016478	0.0170419	-0.0756007	0.591423	0.779601
ENSMUSG00000036218	239618	Pdzrn4	0.52412	0.0016505	0.0170491	-0.171081	0.46171	0.689769
ENSMUSG00000026315	20725	Serpinb8	-0.521535	0.00165781	0.0171126	0.468314	0.00696944	0.114923
ENSMUSG00000023036	93717	Pcdhga9	0.588529	0.00166521	0.0171771	0.312551	0.0847048	0.328745
ENSMUSG00000074457	67860	S100a16	-0.458189	0.00167857	0.0172909	0.332765	0.183682	0.451644
ENSMUSG00000047067	67446	Dusp28	0.478776	0.00169231	0.0174203	0.353247	0.096894	0.347853
ENSMUSG00000020263	216190	Appl2	0.3707	0.00169482	0.0174341	0.251783	0.0985512	0.349662
ENSMUSG00000054509	328417	Parp4	0.433037	0.00169989	0.0174742	-0.0115573	0.960496	0.983343
ENSMUSG00000049252	94217	Lrp1b	0.645187	0.00171064	0.0175725	-0.427167	0.0301859	0.219224
ENSMUSG00000028465	21894	Tln1	-0.365024	0.00171597	0.0175995	0.195771	0.265327	0.530059
ENSMUSG00000021072	72736	Tmx1	-0.476135	0.00171526	0.0175995	-0.323052	0.162059	0.428628
ENSMUSG00000030562	50490	Nox4	-0.632318	0.00171682	0.0175995	-0.22223	0.343	0.598206
ENSMUSG00000031197	22327	Vbp1	-0.47351	0.00172574	0.0176422	-0.429209	0.0588434	0.28901
ENSMUSG00000023017	11419	Accn2	0.578551	0.00172247	0.0176422	0.17708	0.519564	0.730425
ENSMUSG00000029860	22793	Zyx	-0.498579	0.00172481	0.0176422	0.489447	0.0105376	0.140428
ENSMUSG00000029171	66681	Pgm1	-0.574941	0.00173188	0.0176928	-0.349415	0.106558	0.361251
ENSMUSG00000020869	98238	Lrrc59	-0.380949	0.00174911	0.0178565	0.0469367	0.759051	0.880895
ENSMUSG00000031530	319520	Dusp4	-0.662759	0.00175163	0.01787	0.84058	2.54e-06	0.000362935
ENSMUSG00000070871	227210	Ccnyl1	-0.540805	0.00175797	0.0179223	0.0582402	0.73602	0.867652
ENSMUSG00000036323	66661	Srp72	-0.371049	0.00176826	0.0180149	-0.0324684	0.76754	0.886405
ENSMUSG00000029022	28010	Miip	0.468605	0.0017721	0.0180416	0.608876	0.0254074	0.207334
ENSMUSG00000032842	224814	Abcc10	0.531243	0.00178538	0.0181644	0.359755	0.205233	0.475612
ENSMUSG00000074874	13025	Ctla2b	-0.754238	0.00179945	0.018295	-0.181635	0.376526	0.626637
ENSMUSG00000002329	67881	Mdp1	0.512594	0.00180539	0.0183429	0.417359	0.0456297	0.259311
ENSMUSG00000037363	270035	Letm2	0.630684	0.00180992	0.0183763	0.219761	0.289308	0.55072
ENSMUSG00000031885	12400	Cbfb	-0.400747	0.00182844	0.0185517	-0.3643	0.0824875	0.326497
ENSMUSG00000041372	330406	B4galnt3	-0.885637	0.00183591	0.0185894	0.208697	0.287531	NA
ENSMUSG00000030983	66165	Bccip	-0.356	0.00183554	0.0185894	-0.0535143	0.754537	0.878051
ENSMUSG00000021244	56531	Ylpm1	0.391548	0.00183379	0.0185894	-0.0286136	0.881106	0.944848
ENSMUSG00000024436	66973	Mrps18b	-0.558348	0.00183766	0.0185945	0.631375	0.00700145	0.114923
ENSMUSG00000038319	16511	Kcnh2	0.48111	0.00184434	0.0186493	0.189473	0.352339	0.607361
ENSMUSG00000055407	17760	Mtap6	-0.677207	0.00185455	0.0187398	0.488572	0.0879809	0.334764
ENSMUSG00000043998	217664	Mgat2	-0.362553	0.00185709	0.0187527	-0.251783	0.221763	0.489466
ENSMUSG00000040282	399568	BC052040	0.720937	0.00186032	0.0187726	-0.178818	0.474205	0.699189
ENSMUSG00000006498	19205	Ptbp1	-0.426175	0.00186334	0.0187837	-0.0807958	0.64643	0.813782
ENSMUSG00000021464	26564	Ror2	0.581449	0.00186395	0.0187837	0.423166	0.0663088	0.301619
ENSMUSG00000037211	24063	Spry1	-0.482201	0.0018679	0.0188107	0.00568671	0.980312	0.992892
ENSMUSG00000028496	70122	Mllt3	0.388482	0.00187223	0.0188415	-0.124058	0.39582	0.64214
ENSMUSG00000066842	545370	Hmcn1	-0.352037	0.0018737	0.0188436	-0.383633	0.0818251	0.325378
ENSMUSG00000031701	56445	Dnaja2	-0.382033	0.00188177	0.0189119	-0.272305	0.11627	0.372484
ENSMUSG00000029512	22241	Ulk1	0.392747	0.00190746	0.0191572	0.213459	0.218227	0.486234
ENSMUSG00000049969	71801	Plekhf2	-0.474747	0.00190898	0.0191594	-0.407518	0.00903213	0.130302
ENSMUSG00000070284	331026	Gmppb	-0.455574	0.00192269	0.019284	0.443025	0.0996838	0.351283
ENSMUSG00000044162	414084	Tnip3	0.758758	0.00192904	0.0193346	-0.740215	0.000787692	0.0334229
ENSMUSG00000031983	69551	2310022B05Rik	-0.428076	0.00193196	0.0193509	0.264918	0.160232	0.427946
ENSMUSG00000052374	11472	Actn2	0.37477	0.00194719	0.0194903	0.395031	0.0628427	0.294976
ENSMUSG00000036356	234356	Csgalnact1	-0.459952	0.00195181	0.0195233	-0.423933	0.0285411	0.215897
ENSMUSG00000018846	211347	Pank3	-0.465634	0.00196236	0.0196025	-0.360413	0.076827	0.318286
ENSMUSG00000026500	66359	Fam36a	-0.465578	0.0019614	0.0196025	#VALUE!	NA	NA
ENSMUSG00000053965	242202	Pde5a	-0.481438	0.00196557	0.0196214	-0.297071	0.119742	0.375979
ENSMUSG00000039234	69608	Sec24d	-0.368052	0.00198515	0.0197318	-0.474919	0.00612758	0.108098
ENSMUSG00000035202	102436	Lars2	0.842417	0.00198107	0.0197318	0.192295	0.453232	0.683672
ENSMUSG00000026305	16978	Lrrfip1	-0.340658	0.00198589	0.0197318	0.0835697	0.654266	0.818737
ENSMUSG00000048728	237758	Zfp454	0.765104	0.00198593	0.0197318	0.854027	0.00103963	0.0403006
ENSMUSG00000031176	67117	Dynlt3	-0.376332	0.0019788	0.0197318	-0.277677	0.216717	0.484489
ENSMUSG00000028945	19744	Rheb	-0.333993	0.00198486	0.0197318	-0.318715	0.0654109	0.299839
ENSMUSG00000020388	30794	Pdlim4	0.52374	0.00199842	0.0198426	-0.18842	0.356626	0.611047
ENSMUSG00000021408	19766	Ripk1	-0.43119	0.00200059	0.0198509	-0.110445	0.592147	0.780272
ENSMUSG00000044949	327900	Ubtd2	-0.407289	0.00200859	0.0199169	-0.158444	0.455765	0.685602
ENSMUSG00000016510	76366	Mtif3	0.424929	0.00201016	0.0199192	0.486605	0.00898621	0.130135
ENSMUSG00000042251	212933	Pm20d1	0.503338	0.00202746	0.0200772	0.777856	3.47e-07	6.32e-05
ENSMUSG00000038604	75687	Fam65a	0.587802	0.0020423	0.0201923	0.226742	0.413861	0.655394
ENSMUSG00000045954	20324	Sdpr	-0.412815	0.00204314	0.0201923	-0.423494	0.0614148	0.292737
ENSMUSG00000026589	89867	Sec16b	0.540563	0.00204315	0.0201923	0.345393	0.095986	0.346559
ENSMUSG00000058624	14544	Gda	-0.452363	0.00204657	0.0202126	-0.716398	5.75e-05	0.00481043
ENSMUSG00000055313	319207	Pgbd1	0.649061	0.00205144	0.0202314	-0.101528	0.582063	0.773074
ENSMUSG00000008305	21885	Tle1	-0.406869	0.00204986	0.0202314	-0.227455	0.0949668	0.34545
ENSMUSG00000043831	75099	Lysmd4	0.468599	0.00205256	0.0202314	0.238365	0.252278	0.519549
ENSMUSG00000063568	231986	Jazf1	-0.591106	0.00205468	0.0202389	0.161377	0.421901	0.661746
ENSMUSG00000034055	18679	Phka1	0.352003	0.00205692	0.0202475	0.0452226	0.769571	0.887271
ENSMUSG00000034949	103406	Zfr2	0.52932	0.00206567	0.0203201	0.666535	0.0149965	0.16349
ENSMUSG00000072662	545893	Gm5887	0.833761	0.00207527	0.0204011	0.234902	0.426178	NA
ENSMUSG00000000901	17385	Mmp11	0.638412	0.00207926	0.0204268	0.153912	0.498437	0.716025
ENSMUSG00000058756	21833	Thra	0.335422	0.00208082	0.0204286	0.468707	0.0258143	0.20825
ENSMUSG00000029655	381695	N4bp2l2	-0.431373	0.00209476	0.0205519	-0.236184	0.178585	0.444882
ENSMUSG00000022791	51789	Tnk2	0.474484	0.00210621	0.0205929	-0.0966336	0.721592	0.858433
ENSMUSG00000002771	14814	Grin2d	0.804137	0.00210483	0.0205929	-0.0666782	0.806816	NA
ENSMUSG00000007850	59013	Hnrnph1	-0.398109	0.00210477	0.0205929	0.0458927	0.836958	0.92281
ENSMUSG00000046186	235505	Cd109	-0.529571	0.00210726	0.0205929	-0.3346	0.169266	0.435919
ENSMUSG00000035392	227801	Dennd1a	0.357464	0.00210676	0.0205929	0.226159	0.256383	0.522459
ENSMUSG00000017466	21858	Timp2	-0.411189	0.00210523	0.0205929	-0.14522	0.449429	0.680577
ENSMUSG00000028150	19885	Rorc	0.410503	0.00211446	0.0206362	0.192735	0.377271	0.627305
ENSMUSG00000024679	68774	Ms4a6d	-0.699898	0.00211433	0.0206362	-0.64147	0.00328535	0.0798924
ENSMUSG00000033436	67416	Armcx2	-0.392379	0.00211668	0.0206442	-0.0879526	0.595659	0.781852
ENSMUSG00000041351	110351	Rap1gap	0.686475	0.00212484	0.0207102	0.490763	0.0842179	0.327994
ENSMUSG00000024781	16889	Lipa	-0.389291	0.00213029	0.0207246	-0.196772	0.193	0.46238
ENSMUSG00000016024	16803	Lbp	-0.532676	0.00212776	0.0207246	-0.211215	0.434977	0.670663
ENSMUSG00000006850	71983	Tmco6	0.612108	0.0021305	0.0207246	0.60989	0.0397854	0.243152
ENSMUSG00000056515	106572	Rab31	-0.405734	0.00213664	0.0207707	-0.160595	0.271353	0.534989
ENSMUSG00000005732	19385	Ranbp1	-0.511063	0.00214837	0.0208711	-0.183005	0.224718	0.492257
ENSMUSG00000003228	14773	Grk5	0.410954	0.0021578	0.020949	0.0170237	0.90839	0.958655
ENSMUSG00000046034	432940	Fam105b	-0.422695	0.00216531	0.0209726	0.0632144	0.733724	0.86649
ENSMUSG00000042042	78752	Csgalnact2	-0.363467	0.00216588	0.0209726	-0.281462	0.187197	0.455367
ENSMUSG00000070873	232801	Lilra5	-0.687404	0.00216528	0.0209726	-0.379025	0.158737	0.425757
ENSMUSG00000039414	320473	Heatr5b	0.329731	0.00216572	0.0209726	0.189645	0.156767	0.423465
ENSMUSG00000030727	70314	Rabep2	0.504953	0.00217521	0.0210492	0.391073	0.162732	0.429681
ENSMUSG00000042363	216551	1110067D22Rik	-0.405201	0.00218091	0.0210907	-0.337022	0.0615177	0.292878
ENSMUSG00000037493	56506	Cib2	0.688372	0.00218578	0.021124	0.280433	0.343206	0.598278
ENSMUSG00000031666	19651	Rbl2	0.378967	0.00219136	0.0211641	-0.110143	0.384226	0.633729
ENSMUSG00000020019	57764	Ntn4	-0.43223	0.00219593	0.0211945	0.08626	0.605501	0.788869
ENSMUSG00000022957	16443	Itsn1	0.312527	0.00220073	0.021227	0.188703	0.255118	0.521462
ENSMUSG00000030428	57776	Ttyh1	-0.711813	0.0022071	0.0212608	-0.333214	0.150707	0.416204
ENSMUSG00000020782	217325	Llgl2	0.562722	0.00220635	0.0212608	-0.38072	0.174856	0.441356
ENSMUSG00000061894	269585	Zscan20	0.479789	0.0022092	0.0212673	0.0197073	0.919453	0.963846
ENSMUSG00000009378	240638	Slc16a12	-0.531248	0.00221906	0.0213484	-0.104063	0.684154	0.835965
ENSMUSG00000028479	50798	Gne	0.328627	0.00222154	0.0213584	0.0444434	0.724798	0.859926
ENSMUSG00000063488	382118	Zfp167	0.500984	0.00222359	0.0213643	0.597884	0.00369595	0.0852469
ENSMUSG00000015714	76893	Lass2	-0.342664	0.00224328	0.0215395	0.116355	0.567006	0.763512
ENSMUSG00000029578	74781	Wipi2	0.301861	0.00224826	0.0215734	0.0831816	0.56165	0.760466
ENSMUSG00000025255	80892	Zfhx4	0.610484	0.00225512	0.0216252	0.244166	0.309996	0.567465
ENSMUSG00000058318	192285	Phf21a	0.365938	0.00226376	0.0216775	-0.0370851	0.802227	0.903825
ENSMUSG00000026628	11910	Atf3	-0.857343	0.00226572	0.0216775	-0.586951	NA	NA
ENSMUSG00000020652	52504	Cenpo	0.562544	0.00226535	0.0216775	0.135086	0.538194	0.742663
ENSMUSG00000036655	71693	Colec11	-0.528812	0.0022664	0.0216775	0.0375689	0.874003	0.9407
ENSMUSG00000069515	17110	Lyz1	-0.758007	0.00227347	0.0217311	-0.953256	0.00100476	0.0395224
ENSMUSG00000024287	225160	Thoc1	-0.418517	0.00227535	0.0217351	-0.248035	0.197051	0.466798
ENSMUSG00000038217	380712	Tlcd2	-0.568129	0.00228279	0.0217922	0.335048	0.118597	0.374996
ENSMUSG00000037465	21847	Klf10	-0.50778	0.00228718	0.02182	-0.639614	0.00372812	0.0853129
ENSMUSG00000030302	11941	Atp2b2	0.647384	0.00229056	0.0218383	0.510608	0.00786461	0.120672
ENSMUSG00000001508	20391	Sgca	0.363135	0.00229615	0.0218718	0.549289	0.0290472	0.216208
ENSMUSG00000021427	107513	Ssr1	-0.333011	0.00229703	0.0218718	-0.301134	0.0600354	0.291155
ENSMUSG00000042903	54601	Foxo4	0.43714	0.00230677	0.0219505	-0.0100728	0.952806	0.980283
ENSMUSG00000004451	64143	Ralb	-0.392673	0.0023108	0.0219607	0.0557666	0.706849	0.849206
ENSMUSG00000037703	241638	Prosapip1	0.440281	0.00230991	0.0219607	-0.19513	0.386048	0.634822
ENSMUSG00000042826	14166	Fgf11	0.67755	0.00231367	0.0219739	-0.105083	0.54638	0.748989
ENSMUSG00000045087	94226	S1pr5	0.858599	0.00232779	0.0220939	-0.0363112	0.900754	0.954951
ENSMUSG00000043029	246788	Trpv3	0.864242	0.00232993	0.0221002	0.268415	0.339681	0.595276
ENSMUSG00000017776	12928	Crk	-0.321829	0.00233329	0.0221179	-0.353173	0.0134781	0.156678
ENSMUSG00000062785	16504	Kcnc3	0.818721	0.00233634	0.0221326	0.314389	0.272698	NA
ENSMUSG00000038068	218215	Rnf144b	-0.41189	0.00234041	0.022157	-0.0358202	0.79179	0.898255
ENSMUSG00000041308	20650	Sntb2	-0.426444	0.00234224	0.0221603	-0.43444	0.0267841	0.210825
ENSMUSG00000060373	15381	Hnrnpc	-0.388495	0.00236067	0.0223205	-0.198613	0.183891	0.451644
ENSMUSG00000025283	20229	Sat1	-0.531688	0.00236683	0.0223502	0.0547554	0.755905	0.87899
ENSMUSG00000001946	69524	Esam	-0.447719	0.00236623	0.0223502	0.0687686	0.70694	0.849206
ENSMUSG00000059901	237360	Adamts14	-0.814483	0.00236939	0.0223601	0.25086	0.374508	NA
ENSMUSG00000031833	546071	Mast3	0.47155	0.00237174	0.0223681	0.341461	0.213859	0.481514
ENSMUSG00000023036	93708	Pcdhga9	0.73375	0.00238583	0.0224725	0.312551	0.0847048	0.328745
ENSMUSG00000066306	101706	Numa1	0.331256	0.00240077	0.022556	0.239778	0.152447	0.418094
ENSMUSG00000049553	20019	Polr1a	0.282171	0.00239981	0.022556	0.495672	0.0143077	0.160283
ENSMUSG00000029438	77045	Bcl7a	0.454097	0.00240673	0.0225977	-0.051967	0.751534	0.876428
ENSMUSG00000028836	230810	Slc30a2	0.763937	0.00241468	0.02265	0.569617	0.0502392	0.270378
ENSMUSG00000049439	77951	Cyp20a1	-0.486704	0.00241535	0.02265	-0.315731	0.0342152	0.229056
ENSMUSG00000034349	70099	Smc4	-0.481666	0.0024215	0.0226665	-0.53662	0.00849711	0.126578
ENSMUSG00000071722	270624	Spin4	-0.613468	0.00242424	0.0226665	-0.340941	0.188298	0.45642
ENSMUSG00000045377	67020	Tmem88	-0.553253	0.00242473	0.0226665	0.456201	0.0774634	0.319003
ENSMUSG00000039831	214137	Arhgap29	-0.422352	0.0024209	0.0226665	-0.556683	0.00244737	0.0686301
ENSMUSG00000020898	68964	1500010J02Rik	0.346835	0.00242312	0.0226665	0.556545	0.0178688	0.177155
ENSMUSG00000023191	14789	Leprel2	-0.445864	0.00243545	0.0227523	0.227897	0.372656	0.624059
ENSMUSG00000020993	78232	Trappc6b	-0.365066	0.00245443	0.0229152	-0.184341	0.240078	0.506611
ENSMUSG00000027624	13821	Epb4.1l1	0.350437	0.00246286	0.0229362	0.160303	0.458639	0.688093
ENSMUSG00000006369	14114	Fbln1	-0.405534	0.00246062	0.0229362	-0.215972	0.211892	0.47966
ENSMUSG00000058248	16510	Kcnh1	-0.629834	0.00246199	0.0229362	-0.160435	0.586996	0.776015
ENSMUSG00000024642	21888	Tle4	-0.461814	0.00246096	0.0229362	-0.400672	0.0224872	0.195321
ENSMUSG00000023068	52014	Nus1	-0.500693	0.00247546	0.0230392	-0.242933	0.172027	0.43832
ENSMUSG00000029778	11517	Adcyap1r1	0.433586	0.00247935	0.0230609	0.107008	0.679525	0.833949
ENSMUSG00000028266	16911	Lmo4	-0.354938	0.00248804	0.0231272	-0.467143	0.0101495	0.138571
ENSMUSG00000044258	13024	Ctla2a	-0.847354	0.00249532	0.0231801	-0.293137	0.235303	0.502658
ENSMUSG00000022507	69053	1810013L24Rik	-0.386221	0.00249684	0.0231801	-0.307255	0.0806865	0.323502
ENSMUSG00000040591	228356	1110051M20Rik	0.378017	0.00251064	0.0232412	0.331456	0.134859	0.394995
ENSMUSG00000051242	93880	Pcdhb9	-0.841679	0.00250659	0.0232412	-0.412825	0.136963	0.398196
ENSMUSG00000039458	268783	Mtmr12	-0.376047	0.0025093	0.0232412	-0.310205	0.0375009	0.238185
ENSMUSG00000038797	22691	Zscan2	0.557535	0.00250887	0.0232412	0.691737	0.0145404	0.161419
ENSMUSG00000035759	71769	Bbs10	0.595625	0.00251285	0.0232415	0.00692549	0.96724	0.987044
ENSMUSG00000031934	55991	Panx1	-0.622464	0.00252148	0.0232923	-0.0521988	0.835012	0.921878
ENSMUSG00000020689	16416	Itgb3	-0.672035	0.00252126	0.0232923	-0.565368	0.0148647	0.163001
ENSMUSG00000030259	71323	Rassf8	0.365573	0.00252633	0.0233081	-0.275756	0.125598	0.38322
ENSMUSG00000043505	317757	Gimap5	-0.706853	0.0025252	0.0233081	-0.317096	0.144365	0.408184
ENSMUSG00000032562	14678	Gnai2	-0.35323	0.00254535	0.0234545	0.226875	0.241529	0.508566
ENSMUSG00000040550	72201	Otud6b	-0.351484	0.0025607	0.0235666	-0.200283	0.204986	0.475586
ENSMUSG00000025145	217366	Lrrc45	0.418245	0.00256677	0.0236064	0.452188	0.11949	0.375754
ENSMUSG00000036594	14960	H2-Aa	-0.534454	0.0025682	0.0236064	-0.879758	0.00134782	0.0479612
ENSMUSG00000085795	353310	Zfp703	0.637023	0.00257453	0.02365	-0.317215	0.162989	0.429971
ENSMUSG00000021108	18755	Prkch	-0.443277	0.00257937	0.0236798	-0.323873	0.0606762	0.292236
ENSMUSG00000006920	14055	Ezh1	0.312574	0.00258697	0.0237349	0.276657	0.140474	0.4032
ENSMUSG00000001441	19155	Npepps	0.437281	0.00258896	0.0237385	0.0800951	0.622915	0.79982
ENSMUSG00000028854	20544	Slc9a1	0.448471	0.00259339	0.0237592	0.0548561	0.844714	0.926313
ENSMUSG00000056216	12611	Cebpg	-0.401951	0.00259442	0.0237592	-0.460758	0.014354	0.160371
ENSMUSG00000001506	12842	Col1a1	-0.783429	0.00261021	0.0238892	-0.0888129	0.712195	0.852689
ENSMUSG00000019852	215821	D10Bwg1379e	-0.540541	0.00261833	0.023934	0.470495	0.0151411	0.163886
ENSMUSG00000003476	12922	Crhr2	0.38216	0.00261724	0.023934	0.247945	0.33141	0.587067
ENSMUSG00000062210	106869	Tnfaip8	-0.438347	0.0026205	0.023939	-0.924658	2.5e-05	0.00241018
ENSMUSG00000031239	16431	Itm2a	-0.636064	0.00262605	0.023975	-0.500106	0.0470179	0.263114
ENSMUSG00000028035	67035	Dnajb4	-0.46	0.00263729	0.0240587	-0.564039	0.0231538	0.197966
ENSMUSG00000032633	216805	Flcn	0.297637	0.00263846	0.0240587	0.305347	0.079048	0.320374
ENSMUSG00000071379	53602	Hpcal1	-0.513634	0.00264271	0.0240827	-0.15842	0.588752	0.777276
ENSMUSG00000026712	17533	Mrc1	-0.381305	0.00264544	0.0240928	0.113674	0.523308	0.733034
ENSMUSG00000025738	214931	Fbxl16	0.540225	0.0026621	0.0242297	-0.423733	0.0902455	0.338069
ENSMUSG00000030110	19713	Ret	-0.632838	0.00267192	0.0243042	0.223116	0.418128	0.65881
ENSMUSG00000055553	75620	2810422J05Rik	0.351956	0.0026811	0.0243429	0.137357	0.420286	0.660423
ENSMUSG00000039270	230316	Megf9	-0.525043	0.00268077	0.0243429	-0.49041	0.0163233	0.170385
ENSMUSG00000027803	97064	Wwtr1	-0.325653	0.00268023	0.0243429	-0.448146	0.0243667	0.203497
ENSMUSG00000022179	74359	4931414P19Rik	0.597904	0.00268458	0.0243596	0.331923	0.133875	0.393626
ENSMUSG00000039842	244329	Mcph1	0.443176	0.00269359	0.0244265	-0.0540931	0.752348	0.876805
ENSMUSG00000033446	67168	Lpar6	-0.460946	0.00270076	0.0244765	-0.128227	0.552983	0.754628
ENSMUSG00000028803	74552	Nipal3	0.324902	0.00270443	0.0244949	0.163445	0.410409	0.652726
ENSMUSG00000028017	13645	Egf	0.329837	0.00271393	0.0245659	0.673241	3.19e-06	0.000434443
ENSMUSG00000020734	14813	Grin2c	-0.46345	0.00274099	0.0247957	1.53017	7.31e-11	3.04e-08
ENSMUSG00000070639	433926	Lrrc8b	-0.543195	0.00274265	0.0247957	-0.0871902	0.700624	0.845793
ENSMUSG00000026484	19821	Rnf2	-0.41061	0.00275416	0.0248695	-0.287582	0.197314	0.466962
ENSMUSG00000030000	11519	Add2	-0.768781	0.00275268	0.0248695	-0.00411543	0.989046	0.995338
ENSMUSG00000056313	69068	1810011O10Rik	-0.535304	0.00276126	0.0249185	-0.00439804	0.983897	0.993717
ENSMUSG00000004843	68942	Chmp2b	-0.397287	0.00276427	0.0249305	-0.253877	0.208237	0.47685
ENSMUSG00000023008	22379	Fmnl3	-0.395766	0.00276768	0.024946	0.330389	0.146284	0.410561
ENSMUSG00000000957	17387	Mmp14	-0.517227	0.0027748	0.0249951	-0.103822	0.623736	0.800516
ENSMUSG00000051747	22138	Ttn	0.362889	0.00277869	0.0249998	0.0422938	0.856365	0.932271
ENSMUSG00000032349	68801	Elovl5	-0.367526	0.00278734	0.0250624	-0.394218	0.011426	0.145235
ENSMUSG00000047126	67300	Cltc	-0.37271	0.00278913	0.0250634	-0.244742	0.121049	0.377541
ENSMUSG00000001542	192657	Ell2	-0.566681	0.00279765	0.0251013	-0.700217	0.00354349	0.0838899
ENSMUSG00000079477	19349	Rab7	-0.404172	0.00279842	0.0251013	-0.265525	0.0595181	0.289805
ENSMUSG00000079614	72124	Seh1l	-0.334254	0.00280574	0.0251518	-0.235637	0.138318	0.399701
ENSMUSG00000027006	66861	Dnajc10	-0.313371	0.00280821	0.0251587	-0.32814	0.0300246	0.218817
ENSMUSG00000037259	241688	6330439K17Rik	0.665992	0.00282792	0.0253184	0.0282084	0.901849	0.955308
ENSMUSG00000046387	93888	Pcdhb17	-0.565626	0.00282944	0.0253184	0.301327	0.141205	0.404149
ENSMUSG00000019899	16773	Lama2	-0.329499	0.00283528	0.0253554	0.0654392	0.722888	0.85906
ENSMUSG00000067889	20743	Spnb3	0.722431	0.00284186	0.025399	0.332614	0.218751	NA
ENSMUSG00000005672	16590	Kit	-0.617444	0.00284364	0.0253995	0.0549432	0.793093	0.899172
ENSMUSG00000037251	74653	4930444A02Rik	0.420338	0.0028603	0.025533	0.436494	0.024203	0.202835
ENSMUSG00000029638	170772	Glcci1	0.472204	0.00286561	0.025565	-0.196714	0.470434	0.696033
ENSMUSG00000015165	15388	Hnrnpl	-0.359515	0.00288153	0.0256917	0.302761	0.0215542	0.191792
ENSMUSG00000020743	69674	Mif4gd	0.364154	0.0028873	0.0257277	0.417153	0.114358	0.370022
ENSMUSG00000027956	70652	Tmem144	-0.417956	0.00289608	0.0257904	-0.582037	0.00428703	0.091352
ENSMUSG00000051977	213389	Prdm9	0.634578	0.00290724	0.0258743	0.34373	0.0738313	0.313243
ENSMUSG00000072647	280668	Adam1a	0.593377	0.00291123	0.0258943	0.302544	0.283699	0.545797
ENSMUSG00000051984	240667	Sec31b	0.403435	0.0029153	0.0259149	0.704969	0.00386675	0.0868561
ENSMUSG00000066687	235320	Zbtb16	-0.575547	0.00291927	0.0259347	-0.246389	0.258984	0.524674
ENSMUSG00000015176	70769	Nolc1	-0.339841	0.00292274	0.02595	0.386612	0.0169681	0.173209
ENSMUSG00000027424	74528	8430406I07Rik	0.391043	0.00292779	0.0259794	0.122618	0.512033	0.72554
ENSMUSG00000026923	18128	Notch1	-0.473334	0.00293642	0.0260274	0.309938	0.223275	0.490719
ENSMUSG00000049090	225791	Zadh2	0.378066	0.00293672	0.0260274	-0.142731	0.287926	0.549787
ENSMUSG00000005220	53419	Corin	0.359337	0.00294194	0.0260582	-0.361502	0.0627552	0.294866
ENSMUSG00000034157	217732	2310044G17Rik	-0.339496	0.00294987	0.0260943	-0.287336	0.134322	0.394494
ENSMUSG00000039988	433667	Ankrd13c	-0.418652	0.00295129	0.0260943	-0.258848	0.0663707	0.301619
ENSMUSG00000020368	12330	Canx	-0.29198	0.00294916	0.0260943	-0.271874	0.0974652	0.34833
ENSMUSG00000035799	22160	Twist1	-0.685198	0.00295619	0.0261221	-0.531914	0.0224332	0.195321
ENSMUSG00000036555	74239	Iqce	0.424744	0.00295994	0.0261397	-0.0791754	0.752357	0.876805
ENSMUSG00000025027	170750	Xpnpep1	-0.395242	0.00296256	0.0261473	0.0914244	0.600934	0.785428
ENSMUSG00000070577	230909	Gm572	0.514303	0.00299203	0.026376	0.5172	0.0735346	0.312931
ENSMUSG00000024197	66905	Plin3	0.380838	0.00299579	0.0263935	-0.693156	8.12e-07	0.000132785
ENSMUSG00000025995	73674	Wdr75	-0.470701	0.00300826	0.0264407	-0.0571164	0.626061	0.801382
ENSMUSG00000051351	22704	Zfp46	0.318157	0.00300591	0.0264407	0.300419	0.0610057	0.292236
ENSMUSG00000023224	12258	Serping1	-0.367663	0.00300689	0.0264407	-0.207666	0.402728	0.647228
ENSMUSG00000039410	70673	Prdm16	0.615922	0.00300776	0.0264407	0.341571	0.183863	0.451644
ENSMUSG00000009114	76964	2610028H24Rik	0.748504	0.00301308	0.0264673	0.141665	0.631873	NA
ENSMUSG00000037999	212285	Arap2	0.377746	0.00301486	0.0264673	-0.0709929	0.686068	0.837354
ENSMUSG00000049470	93736	Aff4	-0.368366	0.00302274	0.0265209	-0.323004	0.0183265	0.177698
ENSMUSG00000037129	214531	Tmprss13	0.737243	0.00302967	0.0265503	0.933102	0.000785693	0.0334229
ENSMUSG00000032002	76863	Dcun1d5	-0.367306	0.00302964	0.0265503	-0.114978	0.428221	0.665491
ENSMUSG00000038644	18971	Pold1	0.525578	0.0030612	0.0267792	0.00366652	0.99014	0.995618
ENSMUSG00000040163	73344	1700034J05Rik	0.749948	0.00306006	0.0267792	0.0919092	0.717955	0.856225
ENSMUSG00000039917	215160	Rhbdd2	0.373682	0.00306111	0.0267792	-0.0149823	0.931655	0.970602
ENSMUSG00000038437	246198	Mllt6	0.333852	0.00306586	0.0267884	0.231944	0.191805	0.46158
ENSMUSG00000040618	74551	Pck2	0.525368	0.00306564	0.0267884	-0.351692	0.117035	0.373172
ENSMUSG00000029994	11746	Anxa4	-0.394088	0.00307338	0.0268383	-0.285405	0.0787874	0.320317
ENSMUSG00000028034	51886	Fubp1	-0.373011	0.00310088	0.027052	-0.187476	0.366974	0.618809
ENSMUSG00000029059	66469	2810405K02Rik	0.477785	0.00310149	0.027052	0.126359	0.631809	0.805435
ENSMUSG00000040724	16490	Kcna2	0.575036	0.00311295	0.0271201	0.202982	0.417471	0.658488
ENSMUSG00000031284	18481	Pak3	-0.624204	0.0031119	0.0271201	-0.221514	0.279283	0.542274
ENSMUSG00000020017	15109	Hal	0.713905	0.00311722	0.0271414	-0.25518	0.352408	0.607408
ENSMUSG00000029524	75387	Sirt4	0.473136	0.00311947	0.0271451	-0.152853	0.502074	0.718434
ENSMUSG00000048814	381338	Lonrf2	0.5842	0.00312366	0.0271656	0.205375	0.250266	0.517494
ENSMUSG00000035561	72535	Aldh1b1	0.369052	0.00313111	0.0271985	0.0410287	0.816054	0.91213
ENSMUSG00000021702	21828	Thbs4	-0.736167	0.00312978	0.0271985	-0.460381	0.107362	0.361995
ENSMUSG00000020752	170472	Recql5	0.424386	0.00313393	0.0272071	0.318909	0.100436	0.352361
ENSMUSG00000030718	72590	Ppme1	-0.315112	0.00314552	0.027278	0.0573427	0.775745	0.890675
ENSMUSG00000028211	60599	Trp53inp1	-0.432071	0.00314577	0.027278	-0.369146	0.120132	0.376565
ENSMUSG00000068882	20823	Ssb	-0.367216	0.00315096	0.0273071	-0.246565	0.165744	0.432534
ENSMUSG00000042632	53357	Pla2g6	0.491117	0.00315348	0.027313	0.253613	0.370081	0.621528
ENSMUSG00000001802	435965	Lrp3	-0.463746	0.00316055	0.0273424	0.78755	0.00377513	0.0862108
ENSMUSG00000056481	70445	Cd248	-0.51247	0.00315954	0.0273424	-0.00296521	0.992095	0.99627
ENSMUSG00000022757	21787	Tfg	-0.405613	0.00317325	0.0274203	-0.242287	0.230092	0.498101
ENSMUSG00000029152	68095	Ociad1	-0.309768	0.00317276	0.0274203	0.0411714	0.727165	0.861519
ENSMUSG00000003746	17155	Man1a	-0.350998	0.00318607	0.027515	-0.547792	0.0106821	0.141394
ENSMUSG00000061143	433586	Maml3	0.417525	0.00319673	0.0275631	0.509434	0.0173413	0.174903
ENSMUSG00000002948	26400	Map2k7	0.327199	0.0031972	0.0275631	0.343228	0.0681238	0.304788
ENSMUSG00000042790	235315	Rnf214	0.340028	0.00320904	0.0276491	0.130329	0.302301	0.560827
ENSMUSG00000060814	100503386	Gm4980	0.596568	0.0032118	0.0276568	#N/A	#N/A	#N/A
ENSMUSG00000044938	244923	Klhl31	-0.307821	0.00321844	0.027698	-0.403364	0.0118828	0.148067
ENSMUSG00000035064	13631	Eef2k	0.346355	0.00322914	0.027774	0.0638154	0.681495	0.834748
ENSMUSG00000029123	64293	Stk32b	0.752302	0.00326042	0.0280268	-0.288654	0.332357	0.587958
ENSMUSG00000007877	21393	Tcap	0.480231	0.0032812	0.028163	0.460619	0.0648481	0.298719
ENSMUSG00000030083	80283	Abtb1	0.514981	0.00328196	0.028163	0.130293	0.656214	0.820153
ENSMUSG00000035595	69770	1600002K03Rik	0.68359	0.00328487	0.0281717	0.330142	0.270751	NA
ENSMUSG00000020706	56095	Ftsj3	-0.32098	0.00328867	0.028188	0.352018	0.0994074	0.351279
ENSMUSG00000002908	84036	Kcnn1	0.476842	0.00330998	0.028338	0.196852	0.363923	0.616668
ENSMUSG00000078853	16145	Igtp	0.456501	0.00330892	0.028338	-0.0616476	0.774166	0.890196
ENSMUSG00000049047	71703	Armcx3	-0.514057	0.00331889	0.0283979	-0.473421	0.0221789	0.194687
ENSMUSG00000038520	233204	Tbc1d17	0.417725	0.00332183	0.0284067	0.61849	0.00551265	0.102729
ENSMUSG00000016308	22209	Ube2a	-0.361491	0.0033293	0.0284542	-0.16503	0.339684	0.595276
ENSMUSG00000035189	320091	Ano4	0.37481	0.00334611	0.0285815	-0.125513	0.443529	0.676299
ENSMUSG00000021906	218885	Oxnad1	-0.325703	0.00336444	0.0287215	-0.211576	0.0686559	0.305478
ENSMUSG00000034247	353047	Plekhm1	0.388378	0.00338238	0.0288581	0.322776	0.12769	0.385918
ENSMUSG00000033082	243653	Clec1a	-0.46757	0.00339972	0.0289893	-0.514477	0.0073509	0.117695
ENSMUSG00000015053	14461	Gata2	-0.505503	0.00340402	0.0290093	-0.608082	0.00165312	0.0545567
ENSMUSG00000022253	68646	1110020G09Rik	0.355715	0.0034143	0.0290802	-0.47867	0.0334142	0.22645
ENSMUSG00000075284	215280	Wipf1	-0.465292	0.00341832	0.0290812	-0.403269	0.07514	0.315792
ENSMUSG00000000693	16950	Loxl3	-0.515185	0.00341685	0.0290812	0.0790139	0.723575	0.859456
ENSMUSG00000072235	22142	Tuba1a	-0.832859	0.00342928	0.0291577	-0.502086	0.00916875	0.131082
ENSMUSG00000027799	26422	Nbea	0.322889	0.00343537	0.0291928	-0.0146729	0.923425	0.966038
ENSMUSG00000019846	16775	Lama4	-0.278525	0.00344446	0.0292366	-0.111405	0.544174	0.747725
ENSMUSG00000050511	18386	Oprd1	0.783171	0.00345304	0.0292927	0.0123353	0.967174	0.987044
ENSMUSG00000036371	66870	Serbp1	-0.269717	0.00345876	0.0293244	-0.31663	0.156845	0.42351
ENSMUSG00000001419	17261	Mef2d	0.400422	0.00346587	0.029368	0.506598	0.00207823	0.0622012
ENSMUSG00000041697	12861	Cox6a1	-0.360157	0.00347659	0.0294204	0.13458	0.568324	0.764262
ENSMUSG00000031824	234797	6430548M08Rik	0.468369	0.003478	0.0294204	0.579483	0.0139918	0.159308
ENSMUSG00000012422	66074	Tmem167	-0.40832	0.00347506	0.0294204	-0.294935	0.12317	0.379388
ENSMUSG00000010830	105785	Kdelr3	-0.410506	0.00348915	0.0294909	0.0716745	0.730474	0.863773
ENSMUSG00000030748	16190	Il4ra	-0.539651	0.0034903	0.0294909	0.533041	0.0331274	0.2256
ENSMUSG00000020553	18559	Pctp	0.591441	0.00349649	0.0295264	0.111782	0.635792	0.808089
ENSMUSG00000030189	56449	Csda	-0.31226	0.00350989	0.0296227	-0.389026	0.0480524	0.265108
ENSMUSG00000006307	75410	Wbp7	0.373396	0.00354253	0.0298812	0.310921	0.236697	0.503638
ENSMUSG00000006732	17299	Mettl1	-0.45099	0.00354499	0.0298849	0.423922	0.0763727	0.318034
ENSMUSG00000030337	22317	Vamp1	0.501647	0.00356618	0.0300338	0.181379	0.292163	0.552482
ENSMUSG00000024921	67155	Smarca2	0.287921	0.00356669	0.0300338	-0.167112	0.13309	0.392739
ENSMUSG00000024286	67974	Ccny	-0.324975	0.00358022	0.0301306	-0.141474	0.373668	0.62445
ENSMUSG00000022215	68680	Fitm1	0.454941	0.00358284	0.0301356	0.0235801	0.932468	0.97124
ENSMUSG00000047789	268706	Slc38a9	0.367791	0.00359531	0.0302234	-0.0532146	0.670535	0.829915
ENSMUSG00000040701	11766	Ap1g2	0.597552	0.00359742	0.0302241	0.933902	0.00178342	0.0569207
ENSMUSG00000022546	76282	Gpt	0.45452	0.00360696	0.030287	0.595532	0.0312555	0.221309
ENSMUSG00000027087	16410	Itgav	-0.317739	0.00360972	0.0302931	0.132257	0.488464	0.708784
ENSMUSG00000004631	20392	Sgce	-0.433353	0.00361177	0.0302932	-0.245679	0.0995337	0.351279
ENSMUSG00000024750	22682	Zfand5	-0.392541	0.00361956	0.0303414	-0.263362	0.208327	0.476877
ENSMUSG00000050592	241303	Fam78a	0.607633	0.00362475	0.0303507	-0.0566483	0.774407	0.890333
ENSMUSG00000031385	140571	Plxnb3	0.417966	0.0036235	0.0303507	0.299826	0.193999	0.463394
ENSMUSG00000041189	11443	Chrnb1	-0.516407	0.00362687	0.0303512	-0.0457862	0.839885	0.923779
ENSMUSG00000055254	18212	Ntrk2	-0.732719	0.00363863	0.0304325	-0.387424	0.195864	0.465404
ENSMUSG00000061079	20841	Zfp143	-0.390236	0.00364518	0.0304702	-0.194256	0.175569	0.442004
ENSMUSG00000021258	12454	Ccnk	0.410347	0.00366425	0.0305951	0.122481	0.516052	0.728197
ENSMUSG00000021737	66413	Psmd6	-0.310976	0.00366284	0.0305951	-0.0578398	0.716748	0.855185
ENSMUSG00000045625	239827	Pigz	0.596803	0.00369022	0.0307774	0.439355	0.142809	0.406185
ENSMUSG00000012609	320244	Ttll5	0.331036	0.00370892	0.0308884	0.163626	0.379979	0.629983
ENSMUSG00000055053	18029	Nfic	0.449128	0.00370685	0.0308884	0.0970679	0.564172	0.761975
ENSMUSG00000049265	16527	Kcnk3	0.468375	0.00370976	0.0308884	-0.0303238	0.840887	0.923852
ENSMUSG00000030218	17313	Mgp	-0.732072	0.00372526	0.031	0.0877092	0.698745	0.844925
ENSMUSG00000046096	233812	BC030336	-0.461921	0.00372966	0.0310192	-0.391036	0.0458459	0.259657
ENSMUSG00000037622	230796	Wdtc1	0.397947	0.00373233	0.0310241	0.0992339	0.662427	0.823795
ENSMUSG00000017453	19193	Pipox	0.824862	0.00374146	0.0310826	0.209965	0.483252	0.704968
ENSMUSG00000038168	210530	Leprel1	-0.542978	0.00374899	0.0311277	0.0772845	0.768012	0.886606
ENSMUSG00000026435	212980	Slc45a3	-0.809986	0.00376451	0.0312217	0.222569	0.384042	0.633498
ENSMUSG00000032777	233863	Gtf3c1	0.304246	0.00376258	0.0312217	0.610473	0.00433893	0.0919195
ENSMUSG00000004360	212448	9330159F19Rik	-0.652042	0.00376998	0.0312496	0.318579	0.250573	0.517764
ENSMUSG00000059325	74318	Hopx	-0.473319	0.00378649	0.0313689	-0.446146	0.018223	0.177511
ENSMUSG00000067071	55927	Hes6	0.514928	0.00379057	0.0313696	0.60507	0.0364354	0.234949
ENSMUSG00000038831	241308	Ralgps1	0.539607	0.00379079	0.0313696	0.104568	0.545957	0.748621
ENSMUSG00000031340	14404	Gabre	0.822661	0.00380294	0.0314526	0.0117362	0.968267	0.987802
ENSMUSG00000047497	239337	Adamts12	-0.506848	0.00381713	0.0315524	-0.00742879	0.973529	0.989616
ENSMUSG00000032182	74766	Yipf2	0.479129	0.00382201	0.0315751	0.37155	0.126607	0.384844
ENSMUSG00000061244	105504	Exoc5	-0.410566	0.00383916	0.0316992	-0.351952	0.107044	0.36169
ENSMUSG00000030747	67800	Dgat2	0.496866	0.00384462	0.0317267	-0.150388	0.42278	0.662341
ENSMUSG00000022415	20972	Syngr1	0.357196	0.00385365	0.0317835	0.334068	0.152616	0.418373
ENSMUSG00000027412	64899	Lpin3	-0.4821	0.00388302	0.032008	0.855504	0.000590137	0.027789
ENSMUSG00000024325	19763	Ring1	0.503363	0.00389353	0.0320768	0.156962	0.571177	0.765743
ENSMUSG00000044340	98432	Phlpp1	0.357361	0.00389621	0.0320811	0.333242	0.00880955	0.128988
ENSMUSG00000058586	68607	Serhl	0.381144	0.00390212	0.032112	0.657857	0.00751928	0.118253
ENSMUSG00000005204	80886	Senp3	-0.34921	0.0039234	0.0322394	0.170268	0.428184	0.665491
ENSMUSG00000041859	17215	Mcm3	-0.484595	0.00392411	0.0322394	-0.168312	0.494749	0.712787
ENSMUSG00000025658	245684	Cnksr2	-0.677996	0.00392249	0.0322394	-0.395247	0.105397	0.35947
ENSMUSG00000037762	66859	Slc16a9	-0.457711	0.00393097	0.0322778	-0.166607	0.408002	0.651709
ENSMUSG00000060680	667952	Gm8894	-0.642859	0.00393891	0.0323252	#VALUE!	NA	NA
ENSMUSG00000031871	12562	Cdh5	-0.379448	0.00395338	0.0323367	-0.0153245	0.913317	0.960246
ENSMUSG00000029158	75581	Yipf7	-0.322571	0.00394788	0.0323367	-0.563367	0.00341724	0.0814983
ENSMUSG00000023075	68050	Akirin1	-0.454581	0.00394907	0.0323367	-0.306732	0.0977616	0.34856
ENSMUSG00000023827	68262	Agpat4	-0.534073	0.00395304	0.0323367	-0.0927344	0.728737	0.86242
ENSMUSG00000021061	20741	Spnb1	0.338975	0.00394867	0.0323367	0.456115	0.0218721	0.193633
ENSMUSG00000040488	108075	Ltbp4	-0.485261	0.00396644	0.0324257	-0.150698	0.55134	0.753164
ENSMUSG00000026944	11305	Abca2	0.402839	0.00397105	0.0324455	0.188477	0.390605	0.63789
ENSMUSG00000013033	330814	Lphn1	0.371968	0.00398492	0.032523	0.316069	0.0779055	0.319599
ENSMUSG00000014959	70231	Gorasp2	-0.344134	0.00398311	0.032523	-0.127464	0.359441	0.612988
ENSMUSG00000064043	224829	Trerf1	0.550465	0.00399038	0.0325498	-0.301121	0.246622	0.514157
ENSMUSG00000048251	58208	Bcl11b	0.709641	0.00400193	0.032626	0.135445	0.595409	0.781852
ENSMUSG00000027864	19221	Ptgfrn	-0.282646	0.00402676	0.0328105	-0.0518676	0.640065	0.810185
ENSMUSG00000020692	217011	Nle1	0.708373	0.0040317	0.0328327	0.416513	0.143617	0.40733
ENSMUSG00000006390	54325	Elovl1	-0.393968	0.00404212	0.0328995	0.371412	0.14899	0.414075
ENSMUSG00000006301	69660	Tmbim1	-0.306601	0.00404633	0.0329158	0.121809	0.479808	0.703336
ENSMUSG00000018820	319740	Zfyve27	0.346749	0.00405699	0.0329664	0.449886	0.00791357	0.121182
ENSMUSG00000021180	73086	Rps6ka5	0.338724	0.00406091	0.0329802	-0.158192	0.386865	0.635612
ENSMUSG00000038205	108097	Prkab2	-0.383613	0.004075	0.0330765	0.179493	0.260512	0.526256
ENSMUSG00000047419	76469	Cmya5	0.409169	0.00410763	0.0333232	-0.0726817	0.657855	0.821309
ENSMUSG00000056919	382090	4922501C03Rik	0.403992	0.00413157	0.0334895	-0.058613	0.694362	0.842848
ENSMUSG00000027536	66371	Chmp4c	0.404187	0.00413265	0.0334895	-0.165824	0.377786	0.627857
ENSMUSG00000075592	277154	Nynrin	0.409819	0.00414316	0.0335564	0.390098	0.10504	0.359327
ENSMUSG00000066571	233103	4931406P16Rik	-0.335947	0.00414682	0.0335678	-0.218045	0.0979313	0.348909
ENSMUSG00000028634	16656	Hivep3	0.620923	0.00415791	0.0336392	0.202925	0.359479	0.612988
ENSMUSG00000046671	76824	Fam54b	-0.266227	0.00416995	0.0337183	0.429145	0.00647906	0.110511
ENSMUSG00000031312	26549	Itgb1bp2	-0.413135	0.00418585	0.0337864	0.381671	0.0959308	0.346496
ENSMUSG00000024059	78785	Clip4	0.344563	0.00418748	0.0337864	-0.341725	0.0831905	0.327319
ENSMUSG00000026674	18214	Ddr2	-0.378973	0.00418657	0.0337864	-0.424224	0.00372516	0.0853129
ENSMUSG00000024785	59028	Rcl1	-0.525327	0.00418736	0.0337864	-0.0101986	0.96876	0.987825
ENSMUSG00000049687	338368	Fam109b	-0.55435	0.0041962	0.0338321	0.0218115	0.931038	0.970307
ENSMUSG00000020067	68802	Mypn	-0.298534	0.00419769	0.0338321	0.256239	0.24045	0.506952
ENSMUSG00000030888	101867	Rrp8	-0.367986	0.00420416	0.0338659	0.0364946	0.842977	0.92531
ENSMUSG00000016319	11740	Slc25a5	-0.332445	0.00420844	0.033882	-0.246452	0.167975	0.434614
ENSMUSG00000053253	76273	Ndfip2	-0.383025	0.00421294	0.0338996	-0.121522	0.496526	0.714244
ENSMUSG00000041598	56699	Cdc42ep4	-0.502112	0.00422079	0.0339079	0.255267	0.299191	0.558332
ENSMUSG00000037845	382137	Fdxacb1	-0.503223	0.00422665	0.0339366	-0.161992	0.489649	0.709158
ENSMUSG00000056665	223626	4930572J05Rik	0.518583	0.00424039	0.0340102	-0.0438166	0.883455	0.946122
ENSMUSG00000020544	69802	Cox11	-0.416205	0.0042386	0.0340102	0.163595	0.582595	0.773217
ENSMUSG00000049792	70369	Bag5	-0.36822	0.00425712	0.0341259	-0.182387	0.302024	0.560651
ENSMUSG00000050148	54609	Ubqln2	0.481501	0.00426102	0.0341387	-0.316222	0.167228	0.433727
ENSMUSG00000041220	170439	Elovl6	-0.696827	0.00426879	0.0341825	-0.290311	NA	NA
ENSMUSG00000045980	320534	Tmem104	0.461587	0.00427877	0.034244	0.178457	0.4938	0.712267
ENSMUSG00000021253	21809	Tgfb3	-0.394676	0.0042818	0.0342498	-0.045577	0.788613	0.89669
ENSMUSG00000021699	238871	Pde4d	0.431218	0.00428565	0.0342621	0.133004	0.373025	0.624201
ENSMUSG00000001348	11433	Acp5	-0.666338	0.00429461	0.0342988	-0.421794	0.155971	0.42264
ENSMUSG00000037580	14528	Gch1	-0.491203	0.00429486	0.0342988	-0.339561	0.0681864	0.304828
ENSMUSG00000030062	103963	Rpn1	-0.307734	0.00430405	0.0343538	-0.00363373	0.977711	0.991399
ENSMUSG00000038342	208104	Mlxip	0.395167	0.00431754	0.0344429	0.644392	0.00127887	0.0463002
ENSMUSG00000025417	117150	Pip4k2c	0.316584	0.00432079	0.0344504	0.809651	1.29e-05	0.00138515
ENSMUSG00000046567	68281	4930430F08Rik	0.508164	0.00433268	0.0345267	0.0337117	0.851335	0.929383
ENSMUSG00000025531	12662	Chm	-0.458485	0.00434852	0.0346325	-0.5259	0.0151449	0.163886
ENSMUSG00000020902	18208	Ntn1	-0.393062	0.00435063	0.0346325	-0.161751	0.379218	0.629329
ENSMUSG00000070720	623230	Tmem200b	-0.689209	0.00435716	0.0346659	-0.0985994	0.725095	NA
ENSMUSG00000045333	94187	Zfp423	-0.527487	0.0043609	0.0346771	-0.379252	0.13369	0.393551
ENSMUSG00000055302	67568	Mrfap1	-0.267803	0.00437195	0.0347278	-0.199665	0.147068	0.411304
ENSMUSG00000049872	103511	Fam26e	-0.580624	0.00437081	0.0347278	-0.384281	0.0943676	0.344142
ENSMUSG00000033952	12316	Aspm	-0.760913	0.00439597	0.0348999	-0.594878	0.0289543	0.216208
ENSMUSG00000036377	320827	C530008M17Rik	0.371947	0.00440446	0.0349487	0.514281	0.00518581	0.100148
ENSMUSG00000071551	432720	Akr1c19	0.786357	0.00441968	0.0350507	-0.260005	0.335211	0.591137
ENSMUSG00000022297	14368	Fzd6	-0.376855	0.00442861	0.0351027	-0.28223	0.0393442	0.242484
ENSMUSG00000021066	73991	Atl1	0.479063	0.00443497	0.0351344	-0.00892202	0.963954	0.985209
ENSMUSG00000040732	13876	Erg	-0.398646	0.00444995	0.0352155	-0.313422	0.0643643	0.297796
ENSMUSG00000038740	72543	Fam125b	0.384125	0.00444828	0.0352155	0.279604	0.24595	0.513223
ENSMUSG00000072704	381820	2700089E24Rik	-0.3229	0.00446518	0.0353172	-0.383804	0.102646	0.35637
ENSMUSG00000028057	19769	Rit1	0.292609	0.00447082	0.035343	0.545161	0.0174785	0.175678
ENSMUSG00000029669	269831	Tspan12	-0.44341	0.00448658	0.0354488	-0.64861	0.00785418	0.120672
ENSMUSG00000020894	22318	Vamp2	0.351453	0.00449627	0.0355064	0.259902	0.198183	0.468012
ENSMUSG00000031637	67620	Lrp2bp	0.688098	0.00450041	0.0355202	0.0740488	0.758275	0.88062
ENSMUSG00000030760	66190	Acer3	-0.440448	0.00451228	0.035595	-0.474764	0.0180022	0.177408
ENSMUSG00000040102	232539	Klhdc5	-0.372917	0.0045273	0.0356945	-0.108751	0.488139	0.708638
ENSMUSG00000021957	21881	Tkt	-0.356528	0.0045307	0.0357024	0.0211735	0.935336	0.973107
ENSMUSG00000031119	14735	Gpc4	0.462177	0.00453646	0.0357289	0.107464	0.463521	0.69108
ENSMUSG00000019942	12534	Cdk1	-0.795156	0.00453948	0.0357337	-0.635081	0.0296764	0.217857
ENSMUSG00000020900	77579	Myh10	-0.276388	0.00454253	0.0357387	-0.17522	0.222068	0.489559
ENSMUSG00000056310	100929	Tyw1	0.409153	0.00454671	0.0357527	0.373233	0.109789	0.36477
ENSMUSG00000030759	67420	Far1	-0.380007	0.00454945	0.0357553	-0.263426	0.205337	0.475612
ENSMUSG00000037075	75841	Rnf139	-0.401937	0.00456532	0.035861	-0.279122	0.0512144	0.272576
ENSMUSG00000029126	18196	Nsg1	-0.55379	0.00456804	0.0358635	-0.438278	0.0768276	0.318286
ENSMUSG00000031015	20947	Swap70	-0.383193	0.0045794	0.0359336	-0.452846	0.00619394	0.108349
ENSMUSG00000028862	53608	Map3k6	-0.80763	0.00458755	0.0359786	0.160745	0.584271	0.774593
ENSMUSG00000007833	69748	Aldh16a1	0.439146	0.00459367	0.035991	0.0563737	0.820136	0.914572
ENSMUSG00000004508	14389	Gab2	-0.33135	0.00459398	0.035991	-0.0625342	0.723905	0.859517
ENSMUSG00000067916	666532	Gm13139	-0.744467	0.00459783	0.0360022	-0.502651	0.0395019	0.242681
ENSMUSG00000039167	170757	Eltd1	-0.545314	0.00460414	0.0360326	-0.375031	0.0528848	0.27655
ENSMUSG00000060002	212862	Chpt1	-0.315195	0.00461187	0.0360367	-0.36572	0.145998	0.410194
ENSMUSG00000029569	101118	Tmem168	-0.374049	0.00461195	0.0360367	-0.188714	0.312503	0.569699
ENSMUSG00000020072	68371	Pbld1	0.802113	0.00461017	0.0360367	0.173062	0.441093	0.674841
ENSMUSG00000002546	99412	Golga2	0.313722	0.00461597	0.0360492	0.384233	0.0415599	0.249047
ENSMUSG00000036644	76795	Tbc1d9b	0.316538	0.00462815	0.0361253	0.615096	0.000845939	0.0350668
ENSMUSG00000021835	12159	Bmp4	-0.461849	0.00463737	0.0361783	-0.252936	0.325625	0.58242
ENSMUSG00000029570	16848	Lfng	-0.560021	0.00465021	0.0362594	-0.44237	0.0923839	0.341047
ENSMUSG00000024538	19038	Ppic	-0.419837	0.00465799	0.036301	0.142305	0.353801	0.608584
ENSMUSG00000009772	74137	Nuak2	-0.585058	0.00466216	0.0363145	-0.368233	0.176971	0.443322
ENSMUSG00000022707	74185	Gbe1	-0.271706	0.00466819	0.0363217	-0.480787	0.000702315	0.0309742
ENSMUSG00000019338	78266	Zfp687	0.3788	0.00467042	0.0363217	0.609511	0.0133133	0.155474
ENSMUSG00000029029	59002	Wdr8	0.476171	0.00466853	0.0363217	0.706892	0.0122687	0.150406
ENSMUSG00000040570	242819	Rundc3b	-0.744333	0.0046745	0.0363344	-0.546877	0.0450598	0.258215
ENSMUSG00000033306	210126	Lpp	-0.421811	0.00468043	0.0363615	-0.316264	0.105207	0.35947
ENSMUSG00000020120	56193	Plek	-0.427405	0.0046932	0.0364225	-0.736652	0.00137688	0.0488233
ENSMUSG00000036533	260409	Cdc42ep3	-0.335937	0.00469312	0.0364225	-0.125698	0.554109	0.755599
ENSMUSG00000037426	277854	Depdc5	0.311901	0.00472363	0.0366396	0.0367988	0.799239	0.902404
ENSMUSG00000045287	237847	Rtn4rl1	0.505724	0.00474632	0.0367963	0.100595	0.660331	0.822602
ENSMUSG00000042308	233904	Setd1a	0.411923	0.00475291	0.0368282	0.113104	0.652704	0.817649
ENSMUSG00000000085	29871	Scmh1	0.37672	0.00476264	0.0368844	-0.00612869	0.97405	0.989828
ENSMUSG00000042532	71146	Golga7b	0.770081	0.00476797	0.0368911	1.09793	0.000101847	0.00726607
ENSMUSG00000031872	65115	Bean1	-0.73051	0.00476848	0.0368911	-0.100916	0.734008	NA
ENSMUSG00000030609	68048	Aen	-0.380525	0.00479135	0.0370488	0.115639	0.555509	0.756303
ENSMUSG00000050234	14612	Gja4	-0.634315	0.00481194	0.0371886	0.216969	0.456263	0.686139
ENSMUSG00000032085	21345	Tagln	-0.565791	0.0048265	0.0372772	0.383173	0.0943943	0.344142
ENSMUSG00000029234	21982	Tmem165	-0.357818	0.00482842	0.0372772	-0.266697	0.164432	0.431274
ENSMUSG00000040848	108735	Sft2d2	-0.331933	0.00484607	0.037394	-0.134762	0.324933	0.581468
ENSMUSG00000019590	13056	Cyb561	-0.357961	0.00485355	0.0374323	0.329763	0.0623583	0.29382
ENSMUSG00000024610	16149	Cd74	-0.495052	0.00486989	0.0375388	-0.641905	0.0102058	0.138818
ENSMUSG00000062762	13663	Ei24	-0.307731	0.00487966	0.0375947	-0.0612367	0.696752	0.844059
ENSMUSG00000029007	11610	Agtrap	0.284849	0.00490576	0.0377761	0.348255	0.0439621	0.255566
ENSMUSG00000029406	19679	Pitpnm2	0.408713	0.00491147	0.0378005	0.149579	0.47593	0.70062
ENSMUSG00000029676	101185	Pot1a	0.374345	0.0049461	0.0380364	0.0682283	0.592252	0.780281
ENSMUSG00000003233	13544	Dvl3	0.548194	0.00494724	0.0380364	0.41588	0.133458	0.393267
ENSMUSG00000079481	100042480	Nhsl2	-0.476264	0.00495544	0.0380797	-0.527809	0.0086187	0.127194
ENSMUSG00000017781	18738	Pitpna	-0.307942	0.00496628	0.0381433	0.0302485	0.837888	0.923134
ENSMUSG00000090958	434215	Lrrc32	-0.431401	0.00498238	0.0382472	-0.114623	0.621294	0.799215
ENSMUSG00000023977	224826	Ubr2	0.365047	0.00501979	0.0384945	0.0355147	0.850099	0.929071
ENSMUSG00000037071	20249	Scd1	-0.78756	0.00504334	0.0386552	-0.574586	0.0319695	0.223105
ENSMUSG00000018476	216850	Kdm6b	0.575768	0.00505567	0.0387097	0.289172	0.255592	0.521634
ENSMUSG00000055862	71564	Izumo4	0.592289	0.00505446	0.0387097	0.451405	0.121829	0.37798
ENSMUSG00000022892	11820	App	-0.29635	0.00507264	0.0388197	-0.413881	0.0315758	0.222114
ENSMUSG00000041202	18782	Pla2g2d	0.548618	0.0050797	0.0388537	-0.0413929	0.88069	0.944551
ENSMUSG00000033355	67775	Rtp4	-0.634398	0.00509281	0.0389339	-0.113251	0.624538	0.800839
ENSMUSG00000020107	52717	Anapc16	-0.31146	0.0050982	0.0389551	0.263639	0.108227	0.362851
ENSMUSG00000018809	319822	Smyd4	0.39003	0.00510496	0.0389699	0.202197	0.265625	0.530059
ENSMUSG00000054676	72244	1600014C10Rik	0.342625	0.00510538	0.0389699	0.215936	0.16342	0.43027
ENSMUSG00000032679	12509	Cd59a	-0.336633	0.00511944	0.0390571	0.0919824	0.52624	0.735301
ENSMUSG00000075590	223649	Nrbp2	0.376839	0.00512696	0.0390743	0.0642911	0.714282	0.853549
ENSMUSG00000053819	108058	Camk2d	-0.331505	0.00512627	0.0390743	-0.110605	0.453547	0.683776
ENSMUSG00000029650	71706	Slc46a3	0.357258	0.00513048	0.0390811	0.0340938	0.825177	0.916906
ENSMUSG00000038241	16328	Cep250	0.390576	0.00515435	0.0392227	0.0955498	0.675398	0.83169
ENSMUSG00000038446	71713	Cdc40	0.326201	0.00515339	0.0392227	-0.0586414	0.643118	0.81172
ENSMUSG00000033149	208177	Phldb2	-0.394139	0.00517185	0.0393357	-0.356182	0.0709069	0.309069
ENSMUSG00000024169	106633	Ift140	0.349422	0.00518971	0.039411	0.372043	0.112261	0.367502
ENSMUSG00000069520	67226	Tmem19	0.331997	0.00518893	0.039411	0.220313	0.0955865	0.346496
ENSMUSG00000026970	56878	Rbms1	-0.326955	0.00520393	0.0394988	-0.292536	0.112668	0.36824
ENSMUSG00000005802	22785	Slc30a4	-0.47739	0.00521675	0.0395759	-0.555171	0.00400171	0.0882438
ENSMUSG00000058498	433809	Rnf207	0.296424	0.00522093	0.0395874	0.563804	0.00715336	0.116082
ENSMUSG00000037235	17122	Mxd4	-0.376042	0.00523866	0.0396922	0.314944	0.0981199	0.349068
ENSMUSG00000037443	70012	Ccdc21	0.325962	0.00524009	0.0396922	0.122366	0.535583	0.740959
ENSMUSG00000032062	66952	2310030G06Rik	0.456205	0.00524458	0.0396971	-0.359503	0.0675074	0.303616
ENSMUSG00000034105	74347	4632415K11Rik	0.403616	0.00525182	0.0397203	0.386703	0.0646937	0.298337
ENSMUSG00000034220	14733	Gpc1	0.384566	0.00526801	0.0398022	0.107923	0.625557	0.80106
ENSMUSG00000001014	78369	Icam4	0.712474	0.00527504	0.039835	#VALUE!	NA	NA
ENSMUSG00000022756	224022	Slc7a4	0.555278	0.00527804	0.0398374	0.27578	0.346227	0.601526
ENSMUSG00000067653	78321	Ankrd23	-0.779852	0.00530684	0.0400036	-1.10524	7.36e-06	0.000850301
ENSMUSG00000038074	231997	Fkbp14	-0.39204	0.0053054	0.0400036	-0.231966	0.151488	0.416978
ENSMUSG00000022451	19230	Twf1	-0.363371	0.00531626	0.0400242	-0.471142	0.000962121	0.0379886
ENSMUSG00000006715	57441	Gmnn	0.563002	0.00531567	0.0400242	0.0393571	0.835351	0.922016
ENSMUSG00000031357	67043	Syap1	-0.359011	0.00533483	0.0401093	-0.301121	0.129903	0.388537
ENSMUSG00000020614	208659	Fam20a	-0.480883	0.00533403	0.0401093	0.428446	0.107448	0.361995
ENSMUSG00000046722	57912	Cdc42se1	-0.349003	0.00533567	0.0401093	0.0693992	0.693691	0.842596
ENSMUSG00000030890	16202	Ilk	-0.323935	0.00536647	0.0403204	0.0108625	0.921219	NA
ENSMUSG00000046245	231805	Pilra	-0.793094	0.00537207	0.0403421	-0.185704	0.511675	0.725462
ENSMUSG00000057897	12323	Camk2b	0.455289	0.00539337	0.0404816	0.202918	0.331034	0.586972
ENSMUSG00000023328	11423	Ache	0.534172	0.0053985	0.0404997	0.209176	0.482296	0.704538
ENSMUSG00000010067	56289	Rassf1	-0.393262	0.00540527	0.04053	0.250504	0.375905	0.626251
ENSMUSG00000051586	100505050	Mical3	0.361896	0.00542198	0.0405841	0.262349	0.156799	0.423465
ENSMUSG00000022899	57738	Slc15a2	0.378858	0.00542177	0.0405841	0.154682	0.491517	0.710098
ENSMUSG00000019214	214901	Chtf18	0.735466	0.0054162	0.0405841	0.171715	0.543265	NA
ENSMUSG00000024913	16973	Lrp5	-0.400564	0.00542341	0.0405841	0.367414	0.0925475	0.341477
ENSMUSG00000005950	94045	P2rx5	-0.402374	0.00543005	0.0406133	0.575782	0.0229973	0.197157
ENSMUSG00000003526	19125	Prodh	0.385659	0.00544256	0.0406863	0.33887	0.155603	0.422116
ENSMUSG00000042918	74490	Mamstr	0.455382	0.00546243	0.0407733	0.0970561	0.683523	0.83576
ENSMUSG00000038056	231051	Mll3	0.361014	0.00545747	0.0407733	-0.176658	0.293856	0.553537
ENSMUSG00000029851	232748	Fam115c	-0.542238	0.00546131	0.0407733	-0.204505	0.340564	0.595884
ENSMUSG00000012443	16551	Kif11	-0.689634	0.00549091	0.0409037	-0.114819	0.644521	0.81252
ENSMUSG00000032725	14276	Folr2	-0.473026	0.00548676	0.0409037	0.000762163	0.997723	0.998873
ENSMUSG00000053930	380702	Shisa6	0.787407	0.00549065	0.0409037	-0.577606	0.0540697	0.279351
ENSMUSG00000026883	69601	Dab2ip	-0.41897	0.0055076	0.0410074	0.0364311	0.841168	0.924022
ENSMUSG00000036469	72925	March1	-0.581844	0.00551712	0.0410313	-0.287946	0.299011	0.558206
ENSMUSG00000021557	67269	Agtpbp1	0.31143	0.00551587	0.0410313	-0.779382	9.82e-10	3.25e-07
ENSMUSG00000001827	14275	Folr1	-0.753643	0.00551909	0.0410313	0.271707	0.353723	NA
ENSMUSG00000007080	18973	Pole	0.619304	0.00552515	0.0410558	0.31179	0.228227	0.49643
ENSMUSG00000032739	378460	Pram1	0.579357	0.00552971	0.0410692	0.00281172	0.989892	NA
ENSMUSG00000013646	79566	Sh3bp5l	-0.360444	0.00554354	0.0411513	0.285516	0.169106	0.435839
ENSMUSG00000038013	68524	Wipf2	0.462474	0.00555312	0.0412018	0.0809634	0.599482	0.784469
ENSMUSG00000025348	16404	Itga7	0.365574	0.00556272	0.0412524	0.70676	0.00183211	0.0576219
ENSMUSG00000022562	75475	Oplah	0.402096	0.00557551	0.0412649	0.397834	0.0863726	0.332294
ENSMUSG00000015354	76477	Pcolce2	-0.439125	0.00557229	0.0412649	-0.109231	0.438368	0.673139
ENSMUSG00000002608	52132	Ccdc97	0.423458	0.00556921	0.0412649	0.354104	0.0743936	0.314721
ENSMUSG00000030654	54208	Arl6ip1	-0.372645	0.00557504	0.0412649	-0.242376	0.100225	0.352361
ENSMUSG00000026466	208263	Tor1aip1	0.33785	0.00558906	0.0413445	-0.0123469	0.922998	0.965864
ENSMUSG00000046410	52150	Kcnk6	-0.483333	0.00563031	0.041629	-0.0506774	0.832106	0.920458
ENSMUSG00000037007	56314	Zfp113	0.357282	0.00564492	0.0417162	0.00560387	0.972052	0.988971
ENSMUSG00000055923	231326	Aasdh	0.391885	0.00565161	0.0417449	0.21133	0.137494	0.399022
ENSMUSG00000030615	66271	Tmem126a	-0.415046	0.00566578	0.0418035	-0.318763	0.0800981	0.3224
ENSMUSG00000025010	240665	Ccnj	-0.539556	0.00566884	0.0418035	-0.181422	0.460974	0.689632
ENSMUSG00000010064	76257	Slc38a3	0.399868	0.0056708	0.0418035	0.0458232	0.840471	0.923779
ENSMUSG00000029490	243197	Mfsd7a	0.540956	0.0056642	0.0418035	0.0673957	0.811397	0.909719
ENSMUSG00000027787	97112	Nmd3	-0.386059	0.00568229	0.0418674	-0.283009	0.065273	0.299679
ENSMUSG00000024118	72016	1600002H07Rik	0.558812	0.00569282	0.0419034	0.472682	0.0481062	0.265204
ENSMUSG00000056071	20202	S100a9	0.784911	0.00571974	0.0420599	-0.316222	0.291579	0.552168
ENSMUSG00000037370	18605	Enpp1	-0.365229	0.00575001	0.0422198	-0.386046	0.00971856	0.135636
ENSMUSG00000046949	18105	Nqo2	0.305898	0.00574902	0.0422198	-0.0214072	0.872421	0.939584
ENSMUSG00000021610	218335	Clptm1l	-0.28343	0.00575828	0.0422388	0.0115672	0.931264	0.970403
ENSMUSG00000041731	226041	Pgm5	-0.298799	0.00575633	0.0422388	-0.204114	0.135289	0.395903
ENSMUSG00000039671	228880	Zmynd8	0.310738	0.0057801	0.0423779	0.346863	0.0267253	0.21059
ENSMUSG00000041870	68420	Ankrd13a	-0.285885	0.00578407	0.0423861	0.162588	0.226839	0.494764
ENSMUSG00000038550	229599	Gm129	-0.521849	0.0057916	0.0424024	0.262796	0.372703	0.624059
ENSMUSG00000035403	241324	Crb2	0.388391	0.00579955	0.0424367	0.927844	0.000315097	0.0175706
ENSMUSG00000028825	19746	Rhd	0.605153	0.00583492	0.0426745	-0.0868108	0.735143	0.867202
ENSMUSG00000022191	14000	Drosha	0.287658	0.00584694	0.0427414	0.150261	0.222004	0.489559
ENSMUSG00000043241	326622	Upf2	0.353554	0.00585049	0.0427463	-0.0963275	0.512241	0.725562
ENSMUSG00000022197	68070	Pdzd2	0.374272	0.00586038	0.0427554	-0.17351	0.288454	0.550061
ENSMUSG00000034853	329910	Acot11	0.308867	0.00586588	0.0427648	-0.0275674	0.889749	0.949439
ENSMUSG00000027684	14013	Mecom	-0.316506	0.00586741	0.0427648	-0.227202	0.184683	0.452233
ENSMUSG00000031147	54634	Magix	0.438123	0.00588067	0.0428404	-0.393486	0.077332	0.319003
ENSMUSG00000032267	235323	Usp28	-0.314921	0.00588766	0.0428508	-0.00320596	0.981595	0.993403
ENSMUSG00000002565	20259	Scin	0.553362	0.00588787	0.0428508	0.20035	0.356697	0.611047
ENSMUSG00000041879	226432	Ipo9	-0.265087	0.00590267	0.0429354	0.0476934	0.762041	0.88267
ENSMUSG00000021765	14313	Fst	-0.683624	0.00590529	0.0429354	-0.624276	0.00432271	0.0917095
ENSMUSG00000028601	52430	Echdc2	0.302768	0.00593281	0.0430513	0.214747	0.229395	0.497261
ENSMUSG00000042109	105859	Csdc2	0.431667	0.0059267	0.0430513	0.664499	0.00275015	0.0718595
ENSMUSG00000036402	14701	Gng12	-0.427122	0.00592898	0.0430513	-0.369588	0.0625121	0.294222
ENSMUSG00000048368	27047	Omd	-0.725926	0.00593027	0.0430513	-0.466783	0.0564084	0.284873
ENSMUSG00000032437	68292	Stt3b	-0.266754	0.00593754	0.0430645	-0.222068	0.0497672	0.269089
ENSMUSG00000030617	75338	Ccdc83	-0.754725	0.00597154	0.04329	-0.0626981	0.818978	0.913645
ENSMUSG00000079469	55981	Pigb	0.509617	0.00598296	0.0433516	-0.0967849	0.569198	0.764262
ENSMUSG00000005836	14465	Gata6	0.302539	0.00599089	0.043388	-0.466064	0.0367627	0.23591
ENSMUSG00000041642	16565	Kif21b	0.549729	0.0060036	0.0434004	0.631165	0.0352022	0.231148
ENSMUSG00000020577	66109	Tspan13	-0.36887	0.0060043	0.0434004	-0.233121	0.213431	0.481179
ENSMUSG00000063801	11778	Ap3s2	0.310018	0.00600172	0.0434004	0.182128	0.204309	0.475304
ENSMUSG00000078137	383787	Gm1337	0.564767	0.00599952	0.0434004	0.509972	0.0683252	0.304983
ENSMUSG00000038967	18604	Pdk2	0.364557	0.00601231	0.0434126	0.562553	0.0167891	0.171998
ENSMUSG00000034993	26949	Vat1	-0.427534	0.00601373	0.0434126	0.216672	0.40823	0.651752
ENSMUSG00000022983	224432	Scaf4	0.417715	0.00602362	0.0434555	-0.0452831	0.82467	0.916573
ENSMUSG00000020431	432530	Adcy1	0.299956	0.00605496	0.0436428	0.31045	0.0495797	0.268846
ENSMUSG00000040407	100986	Akap9	0.302645	0.00605547	0.0436428	-0.273011	0.0317352	0.222269
ENSMUSG00000028609	17149	Magoh	-0.368306	0.00609007	0.0438371	-0.105592	0.546757	0.749152
ENSMUSG00000050912	71929	Tmem123	-0.346318	0.00609127	0.0438371	-0.428904	0.0405168	0.2457
ENSMUSG00000027210	17536	Meis2	0.30468	0.00608785	0.0438371	-0.319611	0.0343196	0.22925
ENSMUSG00000041992	217944	Rapgef5	-0.410636	0.00609918	0.0438727	-0.359729	0.110437	0.365213
ENSMUSG00000035314	233552	Gdpd5	0.381069	0.00611039	0.0439108	-0.0559349	0.83911	0.923478
ENSMUSG00000028977	69743	Casz1	0.474341	0.00610879	0.0439108	-0.0188517	0.916708	0.962242
ENSMUSG00000025860	11798	Xiap	-0.447536	0.00611673	0.0439351	-0.274181	0.161013	0.427985
ENSMUSG00000060206	242466	Zfp462	0.370257	0.00613024	0.0439896	0.0542645	0.684507	0.836255
ENSMUSG00000036995	230837	Asap3	0.413809	0.00612938	0.0439896	0.216878	0.413156	0.654948
ENSMUSG00000051316	24074	Taf7	-0.454957	0.00613743	0.04402	-0.388527	0.0558581	0.283487
ENSMUSG00000016940	70382	Kctd2	0.364907	0.00617269	0.0442515	0.422085	0.0309135	0.220588
ENSMUSG00000064326	30954	Siva1	0.465481	0.00618388	0.0443103	0.354569	0.226274	0.493953
ENSMUSG00000036568	210982	BC032203	0.346604	0.00619469	0.0443664	-0.176059	0.252422	0.519625
ENSMUSG00000022500	56722	Litaf	-0.358705	0.0061994	0.0443788	0.159774	0.40356	0.647605
ENSMUSG00000055639	13134	Dach1	0.485003	0.00625659	0.0447666	-0.0521832	0.832014	0.920426
ENSMUSG00000036437	18166	Npy1r	0.531019	0.00626173	0.0447818	0.935064	5.65e-07	9.55e-05
ENSMUSG00000061462	380698	Obscn	0.463175	0.00628971	0.044948	0.502552	0.013135	0.154203
ENSMUSG00000021367	13614	Edn1	-0.596956	0.00629103	0.044948	-0.112718	0.647914	0.815016
ENSMUSG00000025190	14718	Got1	0.294012	0.00633398	0.0452114	0.114089	0.554707	0.755909
ENSMUSG00000047368	226016	Fam108b	-0.366218	0.00635745	0.0453572	-0.360896	0.111333	0.366419
ENSMUSG00000020407	22271	Upp1	-0.764502	0.00639421	0.0455616	0.382003	0.154208	0.419723
ENSMUSG00000023806	100037282	Rsph3b	0.576189	0.00639349	0.0455616	-0.138297	0.505894	0.721104
ENSMUSG00000000838	14265	Fmr1	-0.401245	0.00639531	0.0455616	-0.327686	0.161109	0.427985
ENSMUSG00000026208	13346	Des	0.423177	0.00640221	0.0455889	0.156073	0.512589	0.725773
ENSMUSG00000042079	98758	Hnrnpf	-0.386875	0.00640797	0.045608	0.494847	0.0288888	0.216208
ENSMUSG00000050248	68525	Evc2	0.345785	0.00641587	0.0456424	0.217692	0.329912	0.585993
ENSMUSG00000030660	18704	Pik3c2a	-0.35776	0.00643669	0.0457686	-0.251346	0.155692	0.422166
ENSMUSG00000046798	64945	Cldn12	-0.334892	0.00645848	0.0459015	-0.246187	0.110874	0.366324
ENSMUSG00000089911	15247	Hiat1	-0.32755	0.00646278	0.0459101	-0.286001	0.13029	0.389372
ENSMUSG00000027002	50884	Nckap1	-0.365907	0.00651378	0.0462504	-0.330929	0.0148735	0.163001
ENSMUSG00000037344	83704	Slc12a9	0.489152	0.00651966	0.0462699	0.233901	0.435051	0.670663
ENSMUSG00000039686	227693	Zer1	0.362431	0.00652614	0.0462938	0.407011	0.0799862	0.322383
ENSMUSG00000027194	74569	Ttc17	0.305072	0.00653593	0.0463412	0.243773	0.102623	0.35637
ENSMUSG00000039298	214444	Cdk5rap2	0.320336	0.00655193	0.0464324	0.203486	0.226546	0.494326
ENSMUSG00000044562	69903	Rasip1	-0.49542	0.00657672	0.0465859	0.107882	0.639913	0.810095
ENSMUSG00000037166	68458	Ppp1r14a	-0.683058	0.00658234	0.0466035	0.115025	0.671061	NA
ENSMUSG00000025138	209011	Sirt7	0.432736	0.00659145	0.046629	0.392941	0.0986449	0.34969
ENSMUSG00000026768	241226	Itga8	-0.492039	0.00659222	0.046629	-0.166898	0.525778	0.735079
ENSMUSG00000042622	17133	Maff	-0.773306	0.0066009	0.0466681	-0.373682	0.0965619	0.347429
ENSMUSG00000047181	217125	Samd14	0.470932	0.00661237	0.046727	0.0141233	0.961615	0.984031
ENSMUSG00000038502	84113	Ptov1	0.327202	0.00663149	0.0467731	0.312945	0.214643	0.482308
[truncated: 11,792 more rows]
