# Supplementary material for: An atrial fibrillation-associated regulatory region modulates cardiac Tbx5 levels and arrhythmia susceptibility
Source: eLife. 2023 Jan 30;12:e80317. doi: 10.7554/eLife.80317 (PMC9928424; doi:10.7554/eLife.80317)
Supplement: Supplementary file 5. [file elife-80317-supp5.xlsx]

## Sheet: Sheet1
Supplemental file 5. RNAseq comparison of Tbx5RE(int)KO and Tbx5 iKO adult left atria
			Tbx5 RE(int)KO			Tbx5 iKO (p<0.05 only)
Ensembl Gene ID	EntrezGene ID	Associated Gene Name	Log2FC (+ is higher in RE(int)-/-)	P-value	P-adj	Log2FC (+ is higher in RE(int)-/-)	P-value	P-adj
ENSMUSG00000023905	27279	Tnfrsf12a	-2.6082	4.93542e-50	7.33107e-46	2.64283	1.14983e-32	2.4217e-30
ENSMUSG00000024803	107765	Ankrd1	-1.43742	2.71407e-48	2.01574e-44	1.76273	8.13534e-20	5.37681e-18
ENSMUSG00000022816	14314	Fstl1	-1.34434	2.50785e-38	1.24172e-34	2.06285	6.79934e-42	2.82638e-39
ENSMUSG00000031994	30806	Adamts8	-2.41505	7.91962e-37	2.94095e-33	#N/A	#N/A	#N/A
ENSMUSG00000026193	14268	Fn1	-1.27445	6.82345e-27	2.02711e-23	1.81273	6.83636e-22	5.83714e-20
ENSMUSG00000031636	53318	Pdlim3	-1.24095	3.97387e-25	9.83798e-22	1.37669	1.66472e-14	5.34471e-13
ENSMUSG00000039115	104099	Itga9	-1.27274	4.31953e-24	9.16604e-21	0.962702	4.92396e-19	3.00305e-17
ENSMUSG00000021136	64075	Smoc1	-1.50631	5.71431e-24	1.061e-20	1.142	2.02161e-17	1.02351e-15
ENSMUSG00000021614	13003	Vcan	-1.27816	1.91421e-22	3.15929e-19	0.794915	6.78402e-10	1.08243e-08
ENSMUSG00000039004	12161	Bmp6	-1.70981	2.25754e-22	3.35335e-19	1.37325	1.51037e-17	7.89994e-16
ENSMUSG00000030116	50530	Mfap5	-1.39285	5.28469e-22	7.13626e-19	2.01134	1.41185e-45	6.55928e-43
ENSMUSG00000054728	218194	Phactr1	1.04373	2.10776e-21	2.60905e-18	#N/A	#N/A	#N/A
ENSMUSG00000024008	240058	Cpne5	1.53609	1.94896e-20	2.22691e-17	-3.419	3.18016e-16	1.336e-14
ENSMUSG00000060187	237560	Lrrc10	-1.64417	2.92595e-20	3.10443e-17	#N/A	#N/A	#N/A
ENSMUSG00000021870	83997	Slmap	-0.980216	1.08278e-19	1.07224e-16	#N/A	#N/A	#N/A
ENSMUSG00000032902	20501	Slc16a1	-1.0073	3.3401e-19	2.84298e-16	#N/A	#N/A	#N/A
ENSMUSG00000045967	241263	Gpr158	1.21547	3.44511e-19	2.84298e-16	-3.2084	5.91623e-27	8.90026e-25
ENSMUSG00000027858	70747	Tspan2	-1.27799	3.42486e-19	2.84298e-16	#N/A	#N/A	#N/A
ENSMUSG00000046694	100342	Fam46b	-1.85494	1.53545e-18	1.2004e-15	2.33271	6.51959e-18	3.53895e-16
ENSMUSG00000055976	71908	Cldn23	-2.32652	2.09057e-18	1.55267e-15	#N/A	#N/A	#N/A
ENSMUSG00000031849	12845	Comp	-1.41414	2.6624e-18	1.88321e-15	#N/A	#N/A	#N/A
ENSMUSG00000039835	215819	Nhsl1	0.950989	4.60351e-18	3.10821e-15	-0.591964	0.0022358	0.00836889
ENSMUSG00000061718	19049	Ppp1r1b	0.981084	5.39873e-18	3.48664e-15	-1.78222	6.07042e-11	1.14974e-09
ENSMUSG00000028339	12819	Col15a1	-1.06349	5.80585e-18	3.59334e-15	0.820763	4.33564e-07	4.02148e-06
ENSMUSG00000027955	68659	Fam198b	-1.06169	9.38915e-18	5.57865e-15	1.07958	8.46877e-17	3.88874e-15
ENSMUSG00000030208	13730	Emp1	-0.993014	1.75246e-17	1.00119e-14	1.80572	1.06877e-21	8.93241e-20
ENSMUSG00000037820	21817	Tgm2	-1.06637	3.6284e-17	1.99616e-14	0.800727	1.14496e-06	9.80255e-06
ENSMUSG00000070424	11875	Art5	1.24309	5.58325e-17	2.96192e-14	-1.65909	2.36083e-18	1.34143e-16
ENSMUSG00000046818	73284	Ddit4l	1.84005	1.0781e-16	5.52209e-14	-1.03704	0.00110239	0.00453357
ENSMUSG00000020644	15902	Id2	-1.18734	1.45893e-16	6.99063e-14	0.936968	4.53814e-09	6.22261e-08
ENSMUSG00000028341	18124	Nr4a3	-1.91134	1.76979e-16	8.21513e-14	#N/A	#N/A	#N/A
ENSMUSG00000070348	12443	Ccnd1	-1.6549	2.56541e-16	1.15475e-13	0.678721	7.53297e-05	0.000425423
ENSMUSG00000018822	54612	Sfrp5	1.42809	6.46802e-16	2.82577e-13	-2.12483	4.82387e-06	3.58578e-05
ENSMUSG00000026814	13805	Eng	-1.23565	9.312e-16	3.95201e-13	0.834761	2.68394e-08	3.1757e-07
ENSMUSG00000032487	19225	Ptgs2	-1.39991	1.03055e-15	4.25216e-13	1.8713	4.35991e-15	1.52703e-13
ENSMUSG00000024486	15200	Hbegf	-1.57676	1.62278e-15	6.51479e-13	2.12168	6.91093e-10	1.10157e-08
ENSMUSG00000022206	18162	Npr3	-1.13486	1.76636e-15	6.90463e-13	#N/A	#N/A	#N/A
ENSMUSG00000036040	77794	Adamtsl2	-1.57845	3.29523e-15	1.25506e-12	1.54071	2.51457e-13	6.75513e-12
ENSMUSG00000033595	213469	Lgi3	1.57835	3.42292e-15	1.2711e-12	-0.837514	0.00118386	0.00481343
ENSMUSG00000039361	233489	Picalm	-1.3076	5.52259e-15	2.00079e-12	#N/A	#N/A	#N/A
ENSMUSG00000042436	76293	Mfap4	-1.20739	6.82599e-15	2.41412e-12	1.25265	6.62732e-22	5.68941e-20
ENSMUSG00000038173	320981	Enpp6	-1.24679	1.22693e-14	4.23832e-12	#N/A	#N/A	#N/A
ENSMUSG00000001930	22371	Vwf	-1.21806	1.38282e-14	4.66827e-12	0.993577	1.35454e-15	5.11874e-14
ENSMUSG00000021983	50769	Atp8a2	1.03905	1.49729e-14	4.9424e-12	-0.638886	0.00610919	0.0199561
ENSMUSG00000036086	226409	Zranb3	1.14067	1.80915e-14	5.84198e-12	-0.733162	0.00015539	0.000811419
ENSMUSG00000029675	13717	Eln	-1.4327	3.5834e-14	1.13251e-11	3.37187	2.16148e-52	1.48446e-49
ENSMUSG00000056367	242894	Actr3b	1.0079	4.80807e-14	1.4879e-11	#N/A	#N/A	#N/A
ENSMUSG00000027435	17064	Cd93	-0.980105	6.4445e-14	1.9536e-11	#N/A	#N/A	#N/A
ENSMUSG00000022665	67896	Ccdc80	-0.875297	7.79744e-14	2.31646e-11	#N/A	#N/A	#N/A
ENSMUSG00000018593	20692	Sparc	-0.883205	1.85502e-13	5.40284e-11	1.57867	1.44656e-22	1.32848e-20
ENSMUSG00000063275	30963	Ptpla	-1.18946	1.99748e-13	5.70587e-11	0.744791	7.34259e-09	9.67336e-08
ENSMUSG00000026043	12825	Col3a1	-1.11992	2.14419e-13	6.00939e-11	1.63197	3.84775e-23	3.84678e-21
ENSMUSG00000032231	12306	Anxa2	-1.04159	2.51917e-13	6.92957e-11	1.39168	7.94266e-23	7.4238e-21
ENSMUSG00000053166	104010	Cdh22	1.62407	3.00484e-13	8.11525e-11	-1.62787	0.000219722	0.00110709
ENSMUSG00000047485	245683	Klhl34	-1.56069	3.28842e-13	8.72254e-11	0.802788	0.00919303	0.0281148
ENSMUSG00000018217	18858	Pmp22	-0.814278	4.00125e-13	1.04271e-10	0.995489	9.78721e-30	1.777e-27
ENSMUSG00000074059	546161	Fbxw18	-1.15191	5.19465e-13	1.33037e-10	#N/A	#N/A	#N/A
ENSMUSG00000020044	21859	Timp3	-0.89464	5.52108e-13	1.36683e-10	#N/A	#N/A	#N/A
ENSMUSG00000034675	56320	Dbn1	-1.11017	5.70974e-13	1.39037e-10	1.44507	1.7471e-09	2.58401e-08
ENSMUSG00000027377	228576	Mall	-1.43377	6.24454e-13	1.49607e-10	#N/A	#N/A	#N/A
ENSMUSG00000031825	78892	Crispld2	-0.791359	8.27507e-13	1.95108e-10	#N/A	#N/A	#N/A
ENSMUSG00000001493	17285	Meox1	-1.45858	9.70528e-13	2.25254e-10	1.65221	1.37149e-12	3.31763e-11
ENSMUSG00000028273	56376	Pdlim5	-0.800685	1.31064e-12	2.99511e-10	#N/A	#N/A	#N/A
ENSMUSG00000005611	17540	Mrvi1	1.09353	1.41877e-12	3.19308e-10	#N/A	#N/A	#N/A
ENSMUSG00000029580	11461	Actb	-1.00314	1.54712e-12	3.43e-10	1.05109	3.42666e-15	1.21362e-13
ENSMUSG00000007122	12372	Casq1	-1.35962	1.77814e-12	3.88419e-10	2.59608	6.49902e-24	6.75385e-22
ENSMUSG00000032064	330938	Dixdc1	0.972206	1.82201e-12	3.92235e-10	-1.75154	1.25408e-14	4.13557e-13
ENSMUSG00000038777	20360	Sema6c	0.971351	2.38432e-12	5.05953e-10	-1.11385	0.000319333	0.00154587
ENSMUSG00000034845	84094	Plvap	-1.1093	2.6731e-12	5.59243e-10	#N/A	#N/A	#N/A
ENSMUSG00000054690	59308	Emcn	-1.20016	4.68211e-12	9.65946e-10	0.954675	1.29633e-14	4.23951e-13
ENSMUSG00000036545	216725	Adamts2	-0.848383	7.09354e-12	1.44339e-09	1.85624	4.23466e-29	7.51581e-27
ENSMUSG00000020181	260315	Nav3	0.976368	9.16879e-12	1.81591e-09	-1.17379	1.30978e-06	1.10815e-05
ENSMUSG00000040247	108995	Tbc1d10c	1.136	9.08513e-12	1.81591e-09	-2.97478	5.94055e-47	3.1279e-44
ENSMUSG00000028613	16975	Lrp8	-1.11934	9.6775e-12	1.89144e-09	#N/A	#N/A	#N/A
ENSMUSG00000063564	237759	Col23a1	-1.09965	9.80518e-12	1.89151e-09	#N/A	#N/A	#N/A
ENSMUSG00000031328	192176	Flna	-0.871673	1.29576e-11	2.4676e-09	0.958876	5.76295e-16	2.3046e-14
ENSMUSG00000037458	54375	Azin1	-0.752669	1.85169e-11	3.48165e-09	#N/A	#N/A	#N/A
ENSMUSG00000019817	22634	Plagl1	-0.89588	1.87976e-11	3.49024e-09	#N/A	#N/A	#N/A
ENSMUSG00000038156	233744	Spon1	-0.874603	2.17367e-11	3.98613e-09	0.876309	4.16717e-14	1.2562e-12
ENSMUSG00000022885	20440	St6gal1	-1.10563	3.19265e-11	5.64568e-09	#N/A	#N/A	#N/A
ENSMUSG00000026042	12832	Col5a2	-0.926003	3.18655e-11	5.64568e-09	2.44086	2.03171e-39	7.29384e-37
ENSMUSG00000031799	326618	Tpm4	-1.00672	3.24215e-11	5.66575e-09	1.01236	1.02942e-09	1.58486e-08
ENSMUSG00000054871	72309	Tmem158	-1.43515	3.32302e-11	5.73955e-09	0.961899	5.02497e-06	3.72475e-05
ENSMUSG00000027248	14827	Pdia3	-0.668867	4.63838e-11	7.91936e-09	#N/A	#N/A	#N/A
ENSMUSG00000039661	66959	Dusp26	1.73982	4.70414e-11	7.94038e-09	#N/A	#N/A	#N/A
ENSMUSG00000030787	114332	Lyve1	-1.22226	6.48665e-11	1.08262e-08	#N/A	#N/A	#N/A
ENSMUSG00000027887	17306	Sypl2	1.47748	7.77582e-11	1.28336e-08	-0.984973	0.000440046	0.002045
ENSMUSG00000050840	23836	Cdh20	1.57931	8.02157e-11	1.30937e-08	-1.5393	2.69783e-13	7.18632e-12
ENSMUSG00000038633	13244	Degs1	-0.791316	8.14843e-11	1.31562e-08	#N/A	#N/A	#N/A
ENSMUSG00000068614	11464	Actc1	-0.901486	8.25275e-11	1.31813e-08	#N/A	#N/A	#N/A
ENSMUSG00000026638	54139	Irf6	-0.947296	9.47098e-11	1.49662e-08	#N/A	#N/A	#N/A
ENSMUSG00000019732	73316	Calr3	0.827675	9.90439e-11	1.54863e-08	#N/A	#N/A	#N/A
ENSMUSG00000067377	56496	Tspan6	-1.25742	1.06655e-10	1.65026e-08	1.01005	6.66303e-11	1.25297e-09
ENSMUSG00000013089	104156	Etv5	-1.14521	1.15874e-10	1.77442e-08	#N/A	#N/A	#N/A
ENSMUSG00000051236	320183	Msrb3	-0.645427	1.1818e-10	1.79127e-08	#N/A	#N/A	#N/A
ENSMUSG00000001240	54409	Ramp2	-1.16728	1.27486e-10	1.9128e-08	#N/A	#N/A	#N/A
ENSMUSG00000019122	20308	Ccl9	-1.33525	1.30099e-10	1.93249e-08	1.36103	2.30202e-08	2.76103e-07
ENSMUSG00000040721	239102	Zfhx2	1.25207	1.45166e-10	2.11401e-08	#N/A	#N/A	#N/A
ENSMUSG00000024899	23972	Papss2	-0.923971	1.49692e-10	2.15876e-08	#N/A	#N/A	#N/A
ENSMUSG00000026483	63913	Fam129a	-0.692797	1.7577e-10	2.48656e-08	#N/A	#N/A	#N/A
ENSMUSG00000024654	66514	Asrgl1	0.827803	1.7482e-10	2.48656e-08	#N/A	#N/A	#N/A
ENSMUSG00000016382	102866	Pls3	-0.833776	2.07338e-10	2.90546e-08	#N/A	#N/A	#N/A
ENSMUSG00000026640	18845	Plxna2	-0.873994	2.23851e-10	3.07878e-08	#N/A	#N/A	#N/A
ENSMUSG00000041445	105450	Mmrn2	-0.947562	2.60912e-10	3.55558e-08	#N/A	#N/A	#N/A
ENSMUSG00000027894	229706	Slc6a17	1.09495	2.64938e-10	3.57763e-08	-1.68157	1.43089e-10	2.55682e-09
ENSMUSG00000038702	319901	Dsel	-0.90224	2.79087e-10	3.73474e-08	#N/A	#N/A	#N/A
ENSMUSG00000003814	12317	Calr	-0.779587	3.02899e-10	4.0172e-08	#N/A	#N/A	#N/A
ENSMUSG00000020717	18613	Pecam1	-1.08444	3.22908e-10	4.24467e-08	#N/A	#N/A	#N/A
ENSMUSG00000029231	18595	Pdgfra	-0.647455	3.30533e-10	4.30679e-08	#N/A	#N/A	#N/A
ENSMUSG00000048120	12495	Entpd1	-1.27879	3.80068e-10	4.86683e-08	0.886566	9.23218e-12	1.96804e-10
ENSMUSG00000048218	105827	Amigo2	-0.988796	3.78404e-10	4.86683e-08	#N/A	#N/A	#N/A
ENSMUSG00000032925	223272	Itgbl1	-0.83715	3.89468e-10	4.94458e-08	1.21096	7.86272e-16	3.07424e-14
ENSMUSG00000079243	22437	Xirp1	-1.15317	4.35379e-10	5.48061e-08	1.74352	7.76172e-23	7.29786e-21
ENSMUSG00000000753	20317	Serpinf1	-0.917872	4.74449e-10	5.92224e-08	0.776573	0.000132828	0.000702896
ENSMUSG00000026558	80914	Uck2	-0.952429	5.1815e-10	6.36083e-08	1.03371	1.66949e-06	1.38069e-05
ENSMUSG00000026728	22352	Vim	-0.734909	6.39801e-10	7.72651e-08	1.15661	5.84886e-25	6.59919e-23
ENSMUSG00000079465	12828	Col4a3	-0.809274	8.51449e-10	1.00376e-07	#N/A	#N/A	#N/A
ENSMUSG00000042851	78751	Zc3h6	0.865088	8.45446e-10	1.00376e-07	-1.40049	1.33505e-14	4.35713e-13
ENSMUSG00000030703	68616	Gdpd3	0.740492	8.81188e-10	1.03064e-07	#N/A	#N/A	#N/A
ENSMUSG00000031486	78560	Gpr124	-0.759576	9.29114e-10	1.07821e-07	#N/A	#N/A	#N/A
ENSMUSG00000031448	234072	Adprhl1	-0.817041	9.56325e-10	1.10118e-07	#N/A	#N/A	#N/A
ENSMUSG00000038668	14745	Lpar1	-0.751985	1.00898e-09	1.15288e-07	0.804997	2.3514e-11	4.76188e-10
ENSMUSG00000035722	27403	Abca7	0.824258	1.03547e-09	1.16045e-07	#N/A	#N/A	#N/A
ENSMUSG00000027004	20378	Frzb	-0.906717	1.03905e-09	1.16045e-07	2.06624	2.56597e-07	2.51284e-06
ENSMUSG00000021991	12294	Cacna2d3	0.948759	1.03557e-09	1.16045e-07	-0.956909	8.02117e-05	0.000448663
ENSMUSG00000074207	11522	Adh1	-1.18916	1.09712e-09	1.20715e-07	#N/A	#N/A	#N/A
ENSMUSG00000030536	29875	Iqgap1	-0.561543	1.09183e-09	1.20715e-07	#N/A	#N/A	#N/A
ENSMUSG00000050295	17300	Foxc1	-1.03282	1.18577e-09	1.29511e-07	#N/A	#N/A	#N/A
ENSMUSG00000071226	330409	Cecr2	0.938719	1.22115e-09	1.32401e-07	#N/A	#N/A	#N/A
ENSMUSG00000039005	21898	Tlr4	-1.02431	1.2634e-09	1.35989e-07	#N/A	#N/A	#N/A
ENSMUSG00000002346	73095	Slc25a42	0.83542	1.36448e-09	1.45813e-07	#N/A	#N/A	#N/A
ENSMUSG00000001494	74499	Sost	-1.72359	1.43493e-09	1.52246e-07	1.77329	5.72439e-07	5.19371e-06
ENSMUSG00000050296	74591	Abca12	0.936045	1.52787e-09	1.57783e-07	-2.96138	5.52268e-25	6.27599e-23
ENSMUSG00000030268	12035	Bcat1	-1.45993	1.5296e-09	1.57783e-07	1.15398	3.61627e-07	3.41522e-06
ENSMUSG00000032177	18577	Pde4a	0.990507	1.51858e-09	1.57783e-07	#N/A	#N/A	#N/A
ENSMUSG00000089945	11641	Gm20459	-0.789192	1.52538e-09	1.57783e-07	#N/A	#N/A	#N/A
ENSMUSG00000038729	11641	Akap2	-0.789192	1.52538e-09	1.57783e-07	#N/A	#N/A	#N/A
ENSMUSG00000029685	78910	Asb15	1.07573	1.56476e-09	1.60296e-07	-1.28233	0.00134436	0.00538288
ENSMUSG00000004891	18008	Nes	-0.932108	1.82277e-09	1.85448e-07	0.948307	1.78267e-05	0.000117476
ENSMUSG00000000058	12390	Cav2	-0.873515	1.89533e-09	1.91518e-07	#N/A	#N/A	#N/A
ENSMUSG00000040265	103967	Dnm3	1.05525	1.95588e-09	1.96301e-07	-1.25856	7.08415e-07	6.3043e-06
ENSMUSG00000044042	14260	Fmn1	0.800049	2.06045e-09	2.05409e-07	#N/A	#N/A	#N/A
ENSMUSG00000017969	19223	Ptgis	-0.848073	2.13721e-09	2.1164e-07	1.02196	5.77115e-11	1.097e-09
ENSMUSG00000015932	56431	Dstn	-0.754467	2.2281e-09	2.1918e-07	#N/A	#N/A	#N/A
ENSMUSG00000024084	70536	Qpct	-1.08921	2.24472e-09	2.19362e-07	0.901461	4.37169e-10	7.20827e-09
ENSMUSG00000036256	29817	Igfbp7	-0.72388	2.37258e-09	2.30342e-07	1.27786	1.69332e-19	1.08731e-17
ENSMUSG00000085272	381835	Gm1078	0.644254	2.67174e-09	2.56039e-07	-5.44635	3.56714e-72	9.39109e-69
ENSMUSG00000024395	225341	Lims2	-0.87968	2.74998e-09	2.61848e-07	#N/A	#N/A	#N/A
ENSMUSG00000045930	66864	Clec14a	-0.72725	2.99345e-09	2.83214e-07	#N/A	#N/A	#N/A
ENSMUSG00000058672	22151	Tubb2a	-1.017	3.31971e-09	3.10132e-07	0.779499	4.10471e-08	4.67009e-07
ENSMUSG00000024087	13078	Cyp1b1	-1.06494	3.38054e-09	3.1384e-07	#N/A	#N/A	#N/A
ENSMUSG00000046841	216197	Ckap4	-0.900709	3.65898e-09	3.3758e-07	1.16365	9.01968e-14	2.58107e-12
ENSMUSG00000090799	546611	Klhl33	0.932438	3.7516e-09	3.43989e-07	-1.63099	6.96946e-11	1.30593e-09
ENSMUSG00000036052	56323	Dnajb5	-0.943276	3.82446e-09	3.4705e-07	0.841317	6.86305e-07	6.12825e-06
ENSMUSG00000050505	219257	Pcdh20	-1.35593	3.8317e-09	3.4705e-07	#N/A	#N/A	#N/A
ENSMUSG00000050211	329502	Pla2g4e	0.744325	4.04539e-09	3.64183e-07	-1.78731	1.7113e-18	9.9017e-17
ENSMUSG00000061535	109323	C1qtnf7	-0.739946	4.47994e-09	4.00874e-07	0.730081	6.75752e-08	7.43845e-07
ENSMUSG00000027712	11747	Anxa5	-0.627145	4.54227e-09	4.04017e-07	1.14136	4.0114e-17	1.92596e-15
ENSMUSG00000027381	12125	Bcl2l11	0.74887	4.73005e-09	4.15741e-07	-1.06857	1.74029e-07	1.76215e-06
ENSMUSG00000021701	20620	Plk2	-0.746004	4.72129e-09	4.15741e-07	1.464	1.63384e-18	9.48828e-17
ENSMUSG00000037996	76376	Slc24a2	1.0086	5.1633e-09	4.51151e-07	-1.17277	1.19988e-10	2.17354e-09
ENSMUSG00000091402	217874	BC048943	1.30638	5.27791e-09	4.58469e-07	-2.13199	5.00343e-06	3.71053e-05
ENSMUSG00000035783	11475	Acta2	-1.64233	5.44837e-09	4.70524e-07	1.33841	5.68303e-09	7.65948e-08
ENSMUSG00000056201	12631	Cfl1	-0.657637	5.73672e-09	4.92562e-07	1.01538	2.10783e-16	9.04765e-15
ENSMUSG00000006800	72043	Sulf2	-0.636407	5.89325e-09	5.03094e-07	#N/A	#N/A	#N/A
ENSMUSG00000029201	22235	Ugdh	-0.697756	6.03464e-09	5.1222e-07	0.846765	3.70443e-08	4.25256e-07
ENSMUSG00000022456	24050	37865	1.09811	6.33498e-09	5.34658e-07	-1.91489	9.04978e-13	2.23709e-11
ENSMUSG00000047878	239559	A4galt	-0.829391	6.42024e-09	5.38792e-07	#N/A	#N/A	#N/A
ENSMUSG00000023036	93724	Pcdhga9	0.78396	7.22596e-09	6.03002e-07	-0.768724	6.22492e-06	4.52087e-05
ENSMUSG00000015944	80909	Gatsl2	0.790403	7.29004e-09	6.04951e-07	#N/A	#N/A	#N/A
ENSMUSG00000018927	20305	Ccl6	-1.14857	8.00454e-09	6.60552e-07	1.35715	5.47824e-05	0.000322648
ENSMUSG00000029597	231691	Sds	0.765199	8.11133e-09	6.65667e-07	-3.46432	2.72e-47	1.48155e-44
ENSMUSG00000028906	269587	Epb4.1	0.608113	1.0283e-08	8.39248e-07	-1.02147	6.60235e-17	3.08552e-15
ENSMUSG00000037664	12577	Cdkn1c	-0.796656	1.04574e-08	8.4882e-07	#N/A	#N/A	#N/A
ENSMUSG00000024048	67268	Myl12a	-0.853012	1.07961e-08	8.66842e-07	#N/A	#N/A	#N/A
ENSMUSG00000002602	26362	Axl	-0.805371	1.07897e-08	8.66842e-07	#N/A	#N/A	#N/A
ENSMUSG00000058587	50875	Tmod3	-0.725734	1.09409e-08	8.73744e-07	#N/A	#N/A	#N/A
ENSMUSG00000063239	268934	Grm4	1.58509	1.21017e-08	9.61276e-07	#N/A	#N/A	#N/A
ENSMUSG00000020009	15979	Ifngr1	-0.704049	1.23511e-08	9.75865e-07	#N/A	#N/A	#N/A
ENSMUSG00000025780	209378	Itih5	-0.738157	1.35707e-08	1.06656e-06	1.15579	3.24664e-08	3.77922e-07
ENSMUSG00000051098	72852	Mblac2	1.05047	1.41966e-08	1.10987e-06	#N/A	#N/A	#N/A
ENSMUSG00000026879	227753	Gsn	-0.897339	1.49777e-08	1.16481e-06	#N/A	#N/A	#N/A
ENSMUSG00000025492	66141	Ifitm3	-0.71843	1.51565e-08	1.17257e-06	0.932501	7.32209e-10	1.16124e-08
ENSMUSG00000020027	216233	Socs2	-0.72848	1.73044e-08	1.33181e-06	0.718224	5.09193e-10	8.30053e-09
ENSMUSG00000001119	12833	Col6a1	-0.830966	1.74601e-08	1.33686e-06	1.2039	9.75111e-21	7.29993e-19
ENSMUSG00000028476	53614	Reck	-0.74877	1.83705e-08	1.38725e-06	0.763152	2.87866e-09	4.12625e-08
ENSMUSG00000036181	50708	Hist1h1c	0.752538	1.83983e-08	1.38725e-06	0.701022	1.36624e-11	2.86982e-10
ENSMUSG00000004939	69564	Itgb1bp3	-1.10019	1.85198e-08	1.38936e-06	#N/A	#N/A	#N/A
ENSMUSG00000017631	109934	Abr	0.547779	1.98396e-08	1.48089e-06	#N/A	#N/A	#N/A
ENSMUSG00000034245	232232	Hdac11	0.805826	1.99518e-08	1.48182e-06	-0.655557	1.01609e-06	8.78017e-06
ENSMUSG00000024617	12322	Camk2a	0.81678	2.04098e-08	1.5083e-06	-0.945282	0.00010498	0.000568678
ENSMUSG00000040003	50791	Magi2	0.802379	2.06401e-08	1.51776e-06	#N/A	#N/A	#N/A
ENSMUSG00000020571	71853	Pdia6	-0.649613	2.13447e-08	1.56184e-06	0.625424	3.9632e-06	3.02137e-05
ENSMUSG00000026564	240892	Dusp27	-0.732907	2.21206e-08	1.61068e-06	#N/A	#N/A	#N/A
ENSMUSG00000031673	12552	Cdh11	-0.756996	2.31403e-08	1.67671e-06	#N/A	#N/A	#N/A
ENSMUSG00000029095	231148	Ablim2	0.95485	2.36001e-08	1.70173e-06	-1.71726	4.07553e-23	4.04355e-21
ENSMUSG00000050931	74442	Sgms2	-1.077	2.43867e-08	1.74995e-06	0.750939	3.61695e-05	0.000223297
ENSMUSG00000069763	67888	Tmem100	-1.22107	2.50516e-08	1.78902e-06	0.861979	6.61946e-09	8.80725e-08
ENSMUSG00000022037	12759	Clu	0.559104	2.5949e-08	1.84424e-06	#N/A	#N/A	#N/A
ENSMUSG00000048126	12835	Col6a3	-0.919356	2.67433e-08	1.89165e-06	0.895989	3.76235e-05	0.000231066
ENSMUSG00000054966	74071	Ifltd1	1.47972	2.82464e-08	1.98849e-06	-3.87225	1.677e-57	1.55823e-54
ENSMUSG00000027293	98878	Ehd4	-0.517605	2.84296e-08	1.99195e-06	#N/A	#N/A	#N/A
ENSMUSG00000027797	13175	Dclk1	-0.834599	2.87261e-08	2.00328e-06	0.858152	2.52004e-07	2.47092e-06
ENSMUSG00000037206	26968	Islr	-0.830521	2.97439e-08	2.06456e-06	#N/A	#N/A	#N/A
ENSMUSG00000019929	13179	Dcn	-0.756689	3.01292e-08	2.08158e-06	#N/A	#N/A	#N/A
ENSMUSG00000001870	268977	Ltbp1	-0.645982	3.0932e-08	2.12715e-06	#N/A	#N/A	#N/A
ENSMUSG00000062929	12632	Cfl2	-0.720783	3.27915e-08	2.24463e-06	#N/A	#N/A	#N/A
ENSMUSG00000013698	18611	Pea15a	-0.545167	3.30267e-08	2.25036e-06	#N/A	#N/A	#N/A
ENSMUSG00000001604	21401	Tcea3	0.684029	3.4591e-08	2.33552e-06	-0.89906	5.43063e-09	7.34437e-08
ENSMUSG00000029581	14086	Fscn1	-0.91721	3.4904e-08	2.34599e-06	1.10657	1.52571e-09	2.28871e-08
ENSMUSG00000004698	79221	Hdac9	0.707837	3.51993e-08	2.35518e-06	-0.770423	2.76848e-08	3.26336e-07
ENSMUSG00000004665	12798	Cnn2	-0.878934	3.62931e-08	2.41748e-06	0.595714	7.56378e-06	5.39402e-05
ENSMUSG00000030317	110595	Timp4	-0.890449	3.70294e-08	2.4446e-06	-1.23447	9.38832e-10	1.46106e-08
ENSMUSG00000031097	21953	Tnni2	-0.966248	3.69949e-08	2.4446e-06	-1.63697	1.64038e-06	1.35733e-05
ENSMUSG00000002028	214162	Mll1	0.672384	3.7567e-08	2.45835e-06	#N/A	#N/A	#N/A
ENSMUSG00000027800	17112	Tm4sf1	-0.891935	3.75687e-08	2.45835e-06	1.06468	3.89002e-17	1.87338e-15
ENSMUSG00000035049	107094	Rrp12	-0.905998	4.11426e-08	2.68041e-06	1.2911	2.91477e-10	4.95604e-09
ENSMUSG00000027962	22329	Vcam1	-1.10627	4.17609e-08	2.70881e-06	1.31979	4.0817e-24	4.35639e-22
ENSMUSG00000020814	67622	Mxra7	-0.732808	4.52145e-08	2.92007e-06	1.32344	2.42136e-15	8.83321e-14
ENSMUSG00000042675	66090	Ypel3	0.623775	4.68384e-08	3.01185e-06	#N/A	#N/A	#N/A
ENSMUSG00000026478	226519	Lamc1	-0.748981	4.96129e-08	3.17651e-06	#N/A	#N/A	#N/A
ENSMUSG00000025665	67071	Rps6ka6	1.20356	5.06221e-08	3.21893e-06	-1.36357	0.000436219	0.0020302
ENSMUSG00000051067	237403	Lingo3	1.18524	5.07089e-08	3.21893e-06	-1.52175	2.39511e-07	2.3572e-06
ENSMUSG00000027808	28146	Serp1	-0.739833	5.14852e-08	3.2543e-06	0.720494	2.7625e-08	3.25889e-07
ENSMUSG00000061436	15258	Hipk2	0.736933	5.21953e-08	3.27212e-06	#N/A	#N/A	#N/A
ENSMUSG00000037826	243382	Ppm1k	0.725765	5.22076e-08	3.27212e-06	-0.874147	4.69615e-07	4.33044e-06
ENSMUSG00000026527	24012	Rgs7	-0.74705	5.32641e-08	3.32431e-06	-1.24051	1.99855e-14	6.33918e-13
ENSMUSG00000026479	16782	Lamc2	-0.979402	5.5309e-08	3.43749e-06	#N/A	#N/A	#N/A
ENSMUSG00000025409	110962	Mbd6	0.9199	5.67257e-08	3.51085e-06	#N/A	#N/A	#N/A
ENSMUSG00000036862	233651	Dchs1	-0.831649	5.92325e-08	3.65079e-06	#N/A	#N/A	#N/A
ENSMUSG00000028444	12804	Cntfr	0.822842	6.40376e-08	3.93064e-06	-1.59327	3.18108e-06	2.47164e-05
ENSMUSG00000027750	50706	Postn	-0.879898	6.44761e-08	3.94126e-06	2.64072	9.30859e-17	4.22524e-15
ENSMUSG00000001473	67951	Tubb6	-0.850061	6.50895e-08	3.96246e-06	1.39534	3.99421e-16	1.66033e-14
ENSMUSG00000047658	545276	Gal3st3	1.15998	7.38961e-08	4.48022e-06	#N/A	#N/A	#N/A
ENSMUSG00000022122	13618	Ednrb	-0.637092	7.5573e-08	4.56326e-06	#N/A	#N/A	#N/A
ENSMUSG00000036053	71409	Fmnl2	-0.721413	7.91981e-08	4.74358e-06	#N/A	#N/A	#N/A
ENSMUSG00000020695	17534	Mrc2	-0.725264	7.89617e-08	4.74358e-06	1.07877	6.2556e-10	1.0042e-08
ENSMUSG00000028385	209131	Snx30	-0.630871	8.18773e-08	4.88436e-06	#N/A	#N/A	#N/A
ENSMUSG00000015143	109711	Actn1	-0.763863	8.37542e-08	4.96224e-06	1.46146	4.11332e-17	1.96891e-15
ENSMUSG00000048332	108927	Lhfp	-0.617022	8.38509e-08	4.96224e-06	0.754247	5.34883e-11	1.02753e-09
ENSMUSG00000026415	64435	Fcamr	0.680761	8.55986e-08	5.02896e-06	-2.22274	1.9245e-06	1.56214e-05
ENSMUSG00000032290	56294	Ptpn9	-0.709512	8.56556e-08	5.02896e-06	#N/A	#N/A	#N/A
ENSMUSG00000046182	269994	Gsg1l	1.14607	8.73476e-08	5.10812e-06	#N/A	#N/A	#N/A
ENSMUSG00000024085	17158	Man2a1	-0.859743	8.97443e-08	5.22769e-06	#N/A	#N/A	#N/A
ENSMUSG00000044770	268297	Scml4	-0.971326	9.09455e-08	5.27697e-06	1.27299	3.17283e-07	3.04669e-06
ENSMUSG00000002900	16777	Lamb1	-0.678928	9.26169e-08	5.35304e-06	#N/A	#N/A	#N/A
ENSMUSG00000029019	18158	Nppb	-1.4667	9.35226e-08	5.38444e-06	1.16343	4.18544e-08	4.75096e-07
ENSMUSG00000040605	56175	Bace2	-0.904837	9.46751e-08	5.42974e-06	0.955876	1.99983e-11	4.09188e-10
ENSMUSG00000024754	83921	Tmem2	-0.990101	9.8312e-08	5.61664e-06	#N/A	#N/A	#N/A
ENSMUSG00000027375	17153	Mal	-1.12587	1.01269e-07	5.76342e-06	#N/A	#N/A	#N/A
ENSMUSG00000006386	21687	Tek	-0.56522	1.12472e-07	6.37653e-06	#N/A	#N/A	#N/A
ENSMUSG00000001525	22154	Tubb5	-0.817036	1.16616e-07	6.58638e-06	1.07048	2.61151e-13	6.99177e-12
ENSMUSG00000020048	22027	Hsp90b1	-0.609885	1.2069e-07	6.79066e-06	#N/A	#N/A	#N/A
ENSMUSG00000057440	75739	Mpp7	-0.825391	1.22138e-07	6.84618e-06	#N/A	#N/A	#N/A
ENSMUSG00000040820	110948	Hlcs	0.697085	1.29104e-07	7.20945e-06	#N/A	#N/A	#N/A
ENSMUSG00000044006	68709	Cilp2	-0.653776	1.36271e-07	7.58118e-06	-4.43597	7.69082e-127	1.21484e-122
ENSMUSG00000057751	230971	Megf6	-0.856955	1.49146e-07	8.26646e-06	1.28401	2.33083e-15	8.56228e-14
ENSMUSG00000048376	14062	F2r	-0.776398	1.54942e-07	8.52411e-06	0.66528	5.10586e-07	4.67278e-06
ENSMUSG00000062329	231162	Cytl1	-0.932606	1.56525e-07	8.55746e-06	-1.19308	2.37527e-06	1.89302e-05
ENSMUSG00000063558	11761	Aox1	0.654403	1.567e-07	8.55746e-06	-0.66365	1.69756e-06	1.40098e-05
ENSMUSG00000043456	243937	Zfp536	0.926954	1.61888e-07	8.77624e-06	-0.825349	0.000127819	0.00067923
ENSMUSG00000026365	12628	Cfh	-0.711566	1.64995e-07	8.91215e-06	#N/A	#N/A	#N/A
ENSMUSG00000034768	217217	Asb16	1.47461	1.66947e-07	8.98489e-06	#N/A	#N/A	#N/A
ENSMUSG00000020623	26399	Map2k6	0.861447	1.67613e-07	8.98819e-06	#N/A	#N/A	#N/A
ENSMUSG00000025986	227059	Slc39a10	-0.699337	1.8065e-07	9.61784e-06	#N/A	#N/A	#N/A
ENSMUSG00000026670	107652	Uap1	-0.712468	1.80134e-07	9.61784e-06	#N/A	#N/A	#N/A
ENSMUSG00000042804	100129	Gpr153	-0.809697	1.87953e-07	9.97093e-06	1.0865	2.65908e-12	6.19512e-11
ENSMUSG00000024981	433256	Acsl5	-0.631376	1.90827e-07	1.00873e-05	#N/A	#N/A	#N/A
ENSMUSG00000057530	230857	Ece1	-0.819883	2.01783e-07	1.06287e-05	0.779988	2.20176e-10	3.82607e-09
ENSMUSG00000018171	75909	Vmp1	-0.58499	2.02971e-07	1.06535e-05	0.869354	2.09618e-08	2.53532e-07
ENSMUSG00000026463	381290	Atp2b4	-0.615802	2.05233e-07	1.07342e-05	#N/A	#N/A	#N/A
ENSMUSG00000059588	54598	Calcrl	-0.792234	2.1274e-07	1.10879e-05	#N/A	#N/A	#N/A
ENSMUSG00000026837	12831	Col5a1	-0.848384	2.14406e-07	1.11356e-05	1.80007	8.83503e-23	8.2093e-21
ENSMUSG00000070436	12406	Serpinh1	-0.764969	2.15313e-07	1.11438e-05	0.916695	2.71249e-10	4.62705e-09
ENSMUSG00000034205	94352	Loxl2	-0.80839	2.16416e-07	1.1162e-05	2.18417	6.09819e-23	5.88059e-21
ENSMUSG00000025823	12304	Pdia4	-0.551413	2.20957e-07	1.13567e-05	0.707379	2.81458e-06	2.21189e-05
ENSMUSG00000027868	21384	Tbx15	-1.47567	2.22246e-07	1.13836e-05	1.31986	0.00347941	0.0122598
ENSMUSG00000032420	23959	Nt5e	-0.737275	2.26295e-07	1.15512e-05	0.698387	0.000237412	0.00118414
ENSMUSG00000022523	14167	Fgf12	-0.68717	2.39931e-07	1.21636e-05	-1.87422	2.65301e-37	8.05904e-35
ENSMUSG00000021280	74190	1200009I06Rik	1.00659	2.46662e-07	1.24623e-05	#N/A	#N/A	#N/A
ENSMUSG00000041949	272538	Tmco7	0.609271	2.48589e-07	1.25171e-05	#N/A	#N/A	#N/A
ENSMUSG00000024413	18145	Npc1	0.590607	2.51897e-07	1.26408e-05	#N/A	#N/A	#N/A
ENSMUSG00000006442	20810	Srm	-0.867733	2.60623e-07	1.30347e-05	0.976543	6.88497e-07	6.14435e-06
ENSMUSG00000020926	11488	Adam11	0.840591	2.76157e-07	1.37192e-05	-1.43019	3.34725e-08	3.88202e-07
ENSMUSG00000067780	94227	Pi15	-1.07266	2.7613e-07	1.37192e-05	0.620545	0.000488567	0.00224213
ENSMUSG00000032698	16909	Lmo2	-0.572547	2.87515e-07	1.42358e-05	#N/A	#N/A	#N/A
ENSMUSG00000001151	18541	Pcnt	0.549433	2.97615e-07	1.4687e-05	-0.914633	1.20849e-16	5.34714e-15
ENSMUSG00000037972	20621	Snn	0.532442	3.01905e-07	1.48493e-05	-0.64673	1.43326e-09	2.16441e-08
ENSMUSG00000026062	226999	Slc9a2	0.697674	3.1859e-07	1.56183e-05	-0.978112	2.59889e-08	3.08895e-07
ENSMUSG00000068740	53883	Celsr2	0.872954	3.63936e-07	1.77826e-05	#N/A	#N/A	#N/A
ENSMUSG00000032014	102644	Oaf	-0.850028	3.75303e-07	1.82779e-05	#N/A	#N/A	#N/A
ENSMUSG00000040339	329739	Fam102b	-0.679449	3.94433e-07	1.91468e-05	#N/A	#N/A	#N/A
ENSMUSG00000031659	11513	Adcy7	-0.721791	4.3635e-07	2.1044e-05	1.03626	1.48176e-13	4.14264e-12
ENSMUSG00000027351	114715	Spred1	-0.692487	4.38936e-07	2.11002e-05	#N/A	#N/A	#N/A
ENSMUSG00000023036	93723	Pcdhga9	0.794526	4.46088e-07	2.13748e-05	-0.768724	6.22492e-06	4.52087e-05
ENSMUSG00000028348	68016	Murc	-0.68633	4.55233e-07	2.16844e-05	#N/A	#N/A	#N/A
ENSMUSG00000006014	96875	Prg4	1.16556	4.55468e-07	2.16844e-05	#N/A	#N/A	#N/A
ENSMUSG00000002504	65962	Slc9a3r2	-0.890576	4.57435e-07	2.17085e-05	#N/A	#N/A	#N/A
ENSMUSG00000017144	74194	Rnd3	-0.661807	4.89131e-07	2.31387e-05	0.990658	8.15707e-09	1.06136e-07
ENSMUSG00000059854	244653	Hydin	-1.27692	4.95041e-07	2.33439e-05	-1.42946	3.65514e-11	7.19012e-10
ENSMUSG00000021256	238328	Vash1	-0.689018	5.00164e-07	2.34392e-05	0.822393	5.39555e-08	6.01468e-07
ENSMUSG00000021877	11843	Arf4	-0.66177	5.00217e-07	2.34392e-05	#N/A	#N/A	#N/A
ENSMUSG00000029661	12843	Col1a2	-0.813103	5.08278e-07	2.3742e-05	1.65858	1.83816e-25	2.23351e-23
ENSMUSG00000019960	67603	Dusp6	-0.960965	5.24045e-07	2.44018e-05	1.10741	3.13743e-15	1.11619e-13
ENSMUSG00000063455	330286	D630045J12Rik	1.08294	5.4233e-07	2.50179e-05	-0.742537	0.00149118	0.0058872
ENSMUSG00000025701	11689	Alox5	-0.832722	5.44081e-07	2.5021e-05	#N/A	#N/A	#N/A
ENSMUSG00000022367	15117	Has2	-0.980981	5.6539e-07	2.59207e-05	#N/A	#N/A	#N/A
ENSMUSG00000022462	67760	Slc38a2	-0.955356	5.90188e-07	2.69743e-05	1.07906	1.46331e-18	8.52929e-17
ENSMUSG00000026495	68226	Efcab2	0.640732	6.00597e-07	2.73658e-05	-0.937196	5.79574e-06	4.23252e-05
ENSMUSG00000028633	51797	Ctps	-0.618053	6.21142e-07	2.82077e-05	1.06735	1.28789e-13	3.6458e-12
ENSMUSG00000034898	70598	Filip1	-0.542662	6.22872e-07	2.82077e-05	#N/A	#N/A	#N/A
ENSMUSG00000038400	65112	Pmepa1	-0.772478	6.34411e-07	2.8643e-05	0.992772	3.97366e-09	5.50113e-08
ENSMUSG00000042190	14747	Cmklr1	-1.00129	6.53573e-07	2.94187e-05	#N/A	#N/A	#N/A
ENSMUSG00000062275	382106	Fbxw24	-0.948769	6.55715e-07	2.94259e-05	#N/A	#N/A	#N/A
ENSMUSG00000025647	66940	Shisa5	-0.661269	6.73359e-07	3.01267e-05	#N/A	#N/A	#N/A
ENSMUSG00000025227	75146	Tmem180	1.28348	7.07164e-07	3.14498e-05	#N/A	#N/A	#N/A
ENSMUSG00000022099	13829	Epb4.9	-0.8803	7.07052e-07	3.14498e-05	#N/A	#N/A	#N/A
ENSMUSG00000020241	12834	Col6a2	-0.736234	7.10116e-07	3.14867e-05	1.23761	2.64307e-15	9.55377e-14
ENSMUSG00000020142	55963	Slc1a4	-0.820514	7.17013e-07	3.16979e-05	1.39939	1.18327e-09	1.81113e-08
ENSMUSG00000075254	77446	Heg1	-0.629488	7.24415e-07	3.18214e-05	0.692157	5.56359e-06	4.07996e-05
ENSMUSG00000007030	27762	D17H6S56E-3	0.780123	7.26232e-07	3.18214e-05	#N/A	#N/A	#N/A
ENSMUSG00000021390	18295	Ogn	-0.851057	7.22585e-07	3.18214e-05	#N/A	#N/A	#N/A
ENSMUSG00000026864	14828	Hspa5	-0.536757	7.84835e-07	3.40875e-05	#N/A	#N/A	#N/A
ENSMUSG00000047298	240595	Kcnv2	0.813478	7.84073e-07	3.40875e-05	-2.00753	2.9131e-11	5.82473e-10
ENSMUSG00000031740	17390	Mmp2	-0.656306	7.87849e-07	3.41187e-05	#N/A	#N/A	#N/A
ENSMUSG00000019810	66848	Fuca2	-0.624816	7.93948e-07	3.42829e-05	1.19287	1.85422e-17	9.47871e-16
ENSMUSG00000091712	665119	Sec14l5	0.994248	8.10216e-07	3.48839e-05	#N/A	#N/A	#N/A
ENSMUSG00000030217	109978	Art4	-0.937941	8.17495e-07	3.50956e-05	#N/A	#N/A	#N/A
ENSMUSG00000035493	21810	Tgfbi	-0.689545	8.48088e-07	3.6304e-05	#N/A	#N/A	#N/A
ENSMUSG00000042215	213539	Bag2	-0.604647	8.82478e-07	3.76676e-05	#N/A	#N/A	#N/A
ENSMUSG00000006941	68969	Eif1b	0.582258	8.94341e-07	3.7988e-05	#N/A	#N/A	#N/A
ENSMUSG00000074364	259300	Ehd2	-0.614368	8.951e-07	3.7988e-05	#N/A	#N/A	#N/A
ENSMUSG00000025026	27360	Add3	-0.435444	9.48448e-07	4.01375e-05	#N/A	#N/A	#N/A
ENSMUSG00000043067	244745	Dpy19l1	-0.621555	9.53521e-07	4.02375e-05	0.820679	4.98799e-09	6.79226e-08
ENSMUSG00000020333	216739	Acsl6	0.650233	9.65154e-07	4.0613e-05	-0.657519	9.47949e-05	0.000517409
ENSMUSG00000031377	12169	Bmx	-0.746718	9.69259e-07	4.06705e-05	#N/A	#N/A	#N/A
ENSMUSG00000038260	68667	Trpm4	0.652004	1.01591e-06	4.24583e-05	#N/A	#N/A	#N/A
ENSMUSG00000035296	24053	Sgcg	0.468919	1.01758e-06	4.24583e-05	#N/A	#N/A	#N/A
ENSMUSG00000056220	18783	Pla2g4a	-0.877013	1.04418e-06	4.33248e-05	0.674906	8.20322e-05	0.00045755
ENSMUSG00000031840	19339	Rab3a	0.554036	1.05666e-06	4.37204e-05	-0.736924	1.71668e-08	2.11849e-07
ENSMUSG00000001833	235072	39326	-0.710061	1.05998e-06	4.37359e-05	#N/A	#N/A	#N/A
ENSMUSG00000033249	26386	Hsf4	0.99034	1.06361e-06	4.37641e-05	-0.855761	0.00876876	0.0271059
ENSMUSG00000020674	69675	Pxdn	-0.516065	1.07267e-06	4.40149e-05	0.982382	3.69291e-09	5.16222e-08
ENSMUSG00000034120	20382	Srsf2	-0.504025	1.11199e-06	4.55028e-05	#N/A	#N/A	#N/A
ENSMUSG00000093603	20382	Srsf2	-0.504025	1.11199e-06	4.55028e-05	#N/A	#N/A	#N/A
ENSMUSG00000052854	27206	Nrk	-0.980056	1.11952e-06	4.56852e-05	#N/A	#N/A	#N/A
ENSMUSG00000046480	399548	Scn4b	0.668593	1.1351e-06	4.61941e-05	-1.0512	0.0171879	0.0473988
ENSMUSG00000019769	64009	Syne1	0.561918	1.14701e-06	4.65509e-05	-1.02063	1.12003e-25	1.38417e-23
ENSMUSG00000075324	60344	Fign	0.821251	1.17279e-06	4.74675e-05	#N/A	#N/A	#N/A
ENSMUSG00000022752	28185	Tomm70a	-0.501522	1.19102e-06	4.76855e-05	#N/A	#N/A	#N/A
ENSMUSG00000026276	18000	37500	-0.542631	1.1896e-06	4.76855e-05	#N/A	#N/A	#N/A
ENSMUSG00000001123	16859	Lgals9	-0.793327	1.18222e-06	4.76855e-05	0.987442	7.59708e-09	9.94229e-08
ENSMUSG00000032011	21838	Thy1	-0.838764	1.18681e-06	4.76855e-05	1.46503	8.84198e-13	2.19259e-11
ENSMUSG00000022528	15205	Hes1	-0.766753	1.20266e-06	4.80223e-05	#N/A	#N/A	#N/A
ENSMUSG00000023913	27226	Pla2g7	-0.544367	1.23702e-06	4.92618e-05	#N/A	#N/A	#N/A
ENSMUSG00000029714	57330	Gigyf1	0.705853	1.2673e-06	5.03326e-05	#N/A	#N/A	#N/A
ENSMUSG00000038370	66425	Pcp4l1	0.543886	1.27681e-06	5.05752e-05	#N/A	#N/A	#N/A
ENSMUSG00000038456	209773	Dennd2a	-0.567554	1.29448e-06	5.11388e-05	0.621183	1.23309e-05	8.39205e-05
ENSMUSG00000031618	110784	Nr3c2	0.631976	1.30584e-06	5.14327e-05	-1.22818	2.57894e-10	4.41833e-09
ENSMUSG00000031918	77116	Mtmr2	-0.576065	1.30884e-06	5.14327e-05	#N/A	#N/A	#N/A
ENSMUSG00000015468	18132	Notch4	-0.881914	1.31912e-06	5.16999e-05	#N/A	#N/A	#N/A
ENSMUSG00000037406	330723	Htra4	-0.730269	1.3253e-06	5.18053e-05	#N/A	#N/A	#N/A
ENSMUSG00000039286	72007	Fndc3b	-0.620235	1.35674e-06	5.2895e-05	#N/A	#N/A	#N/A
ENSMUSG00000029761	109624	Cald1	-0.634521	1.3939e-06	5.42017e-05	#N/A	#N/A	#N/A
ENSMUSG00000073600	381148	Gm1614	0.622119	1.40234e-06	5.43872e-05	#N/A	#N/A	#N/A
ENSMUSG00000056423	224065	Uts2d	-1.04235	1.45896e-06	5.64358e-05	#N/A	#N/A	#N/A
ENSMUSG00000048473	330440	Gm766	-1.35913	1.47084e-06	5.66008e-05	#N/A	#N/A	#N/A
ENSMUSG00000030096	21366	Slc6a6	-0.583024	1.46711e-06	5.66008e-05	#N/A	#N/A	#N/A
ENSMUSG00000034522	380912	Zfp395	0.91388	1.52002e-06	5.8342e-05	#N/A	#N/A	#N/A
ENSMUSG00000026547	21346	Tagln2	-0.705042	1.55518e-06	5.95378e-05	1.42691	2.5214e-14	7.84018e-13
ENSMUSG00000038384	208043	Setd1b	0.969283	1.56952e-06	5.99324e-05	#N/A	#N/A	#N/A
ENSMUSG00000045871	239250	Slitrk6	1.06768	1.64198e-06	6.23786e-05	-1.42966	2.11123e-05	0.000136957
ENSMUSG00000022096	15460	Hr	-0.66578	1.63874e-06	6.23786e-05	0.751065	4.11452e-05	0.000250166
ENSMUSG00000034714	117160	Ttyh2	-0.85517	1.69352e-06	6.41723e-05	0.733167	0.00726238	0.023119
ENSMUSG00000073599	68545	Ecscr	-0.765428	1.70679e-06	6.45106e-05	#N/A	#N/A	#N/A
ENSMUSG00000022868	11625	Ahsg	-1.32158	1.76083e-06	6.63841e-05	#N/A	#N/A	#N/A
ENSMUSG00000079355	252837	Ccrl1	-0.929171	1.7746e-06	6.67341e-05	1.71195	8.08263e-26	1.02139e-23
ENSMUSG00000042359	99031	Osbpl6	0.616505	1.7844e-06	6.69332e-05	-1.41591	6.67123e-25	7.47367e-23
ENSMUSG00000032184	70082	Lysmd2	-0.650846	1.857e-06	6.94808e-05	0.637066	0.00166441	0.00647721
ENSMUSG00000002233	11853	Rhoc	-0.733341	1.8774e-06	7.00676e-05	0.976453	9.48337e-14	2.70885e-12
ENSMUSG00000026833	56177	Olfm1	0.461857	1.90077e-06	7.07619e-05	-1.54988	2.22657e-20	1.57013e-18
ENSMUSG00000028426	19359	Rad23b	-0.454156	1.94647e-06	7.22823e-05	#N/A	#N/A	#N/A
ENSMUSG00000021109	15251	Hif1a	-0.565004	2.07694e-06	7.69347e-05	#N/A	#N/A	#N/A
ENSMUSG00000020435	74309	Osbp2	0.655977	2.09487e-06	7.7406e-05	-1.91345	6.64171e-31	1.31141e-28
ENSMUSG00000021759	19012	Ppap2a	-0.54745	2.19815e-06	8.06204e-05	#N/A	#N/A	#N/A
ENSMUSG00000000142	12006	Axin2	0.844461	2.2164e-06	8.08903e-05	-0.840549	2.91214e-05	0.000183854
ENSMUSG00000031996	11804	Aplp2	-0.521639	2.21613e-06	8.08903e-05	#N/A	#N/A	#N/A
ENSMUSG00000037253	240396	Mex3c	-0.595396	2.37361e-06	8.64155e-05	0.780113	1.28729e-11	2.71121e-10
ENSMUSG00000039529	54670	Atp8b1	-0.712753	2.45123e-06	8.90234e-05	#N/A	#N/A	#N/A
ENSMUSG00000004791	18654	Pgf	-0.919676	2.50246e-06	9.05464e-05	#N/A	#N/A	#N/A
ENSMUSG00000021913	239017	Ogdhl	-0.89275	2.50536e-06	9.05464e-05	#N/A	#N/A	#N/A
ENSMUSG00000025892	14802	Gria4	-1.33947	2.56394e-06	9.24389e-05	#N/A	#N/A	#N/A
ENSMUSG00000031714	14388	Gab1	0.503367	2.6957e-06	9.69539e-05	-0.662482	2.41373e-12	5.65686e-11
ENSMUSG00000039852	68703	Rere	0.620686	2.77055e-06	9.94051e-05	#N/A	#N/A	#N/A
ENSMUSG00000016494	12490	Cd34	-0.579766	2.80991e-06	0.000100575	#N/A	#N/A	#N/A
ENSMUSG00000024411	11829	Aqp4	0.717302	2.85798e-06	0.000101804	#N/A	#N/A	#N/A
ENSMUSG00000004951	15507	Hspb1	-0.981723	2.85482e-06	0.000101804	#N/A	#N/A	#N/A
ENSMUSG00000021638	18260	Ocln	-0.881918	2.90088e-06	0.000103085	#N/A	#N/A	#N/A
ENSMUSG00000022136	100037258	Dnajc3	-0.645126	2.94158e-06	0.000104282	#N/A	#N/A	#N/A
ENSMUSG00000031298	237175	Gpr64	-0.88708	2.98674e-06	0.000105631	#N/A	#N/A	#N/A
ENSMUSG00000001918	20514	Slc1a5	-0.741043	2.9943e-06	0.000105647	#N/A	#N/A	#N/A
ENSMUSG00000021678	14063	F2rl1	-1.26943	3.03608e-06	0.000106867	#N/A	#N/A	#N/A
ENSMUSG00000057738	20740	Spna2	-0.537537	3.08567e-06	0.000108356	#N/A	#N/A	#N/A
ENSMUSG00000031422	56397	Morf4l2	-0.496655	3.10849e-06	0.0001089	#N/A	#N/A	#N/A
ENSMUSG00000053931	71994	Cnn3	-0.688156	3.25698e-06	0.000113833	0.922968	7.7936e-16	3.05478e-14
ENSMUSG00000026727	20163	Rsu1	-0.540736	3.2865e-06	0.000114596	0.859069	3.48425e-14	1.05638e-12
ENSMUSG00000053334	231630	Ficd	0.629798	3.41511e-06	0.000118254	#N/A	#N/A	#N/A
ENSMUSG00000044393	13511	Dsg2	0.620692	3.4153e-06	0.000118254	-0.926048	5.10896e-12	1.13663e-10
ENSMUSG00000020075	56200	Ddx21	-0.520223	3.41223e-06	0.000118254	#N/A	#N/A	#N/A
ENSMUSG00000033777	279572	Tlr13	-0.86523	3.70041e-06	0.000127828	1.75509	1.40796e-10	2.5187e-09
ENSMUSG00000050503	74165	Fbxl22	-0.872379	3.72122e-06	0.000128248	0.620317	4.42351e-06	3.32574e-05
ENSMUSG00000005397	18073	Nid1	-0.81139	3.75858e-06	0.000129236	#N/A	#N/A	#N/A
ENSMUSG00000046280	214547	She	-0.663142	3.77586e-06	0.00012953	#N/A	#N/A	#N/A
ENSMUSG00000053411	52609	Cbx7	0.58848	3.8678e-06	0.000131942	-0.896956	3.08892e-08	3.61695e-07
ENSMUSG00000036902	74513	Neto2	-0.893543	3.86018e-06	0.000131942	#N/A	#N/A	#N/A
ENSMUSG00000045659	233765	Plekha7	0.561252	3.87281e-06	0.000131942	-1.49177	7.43785e-19	4.45031e-17
ENSMUSG00000025404	71750	R3hdm2	0.653732	3.90179e-06	0.000132625	#N/A	#N/A	#N/A
ENSMUSG00000036528	19024	Ppfibp2	0.479501	3.96005e-06	0.000133992	-1.12826	1.12431e-26	1.61451e-24
ENSMUSG00000020599	19739	Rgs9	1.08836	4.00144e-06	0.000135085	1.54103	6.85769e-07	6.12693e-06
ENSMUSG00000001029	15896	Icam2	-0.787497	4.05388e-06	0.000136545	#N/A	#N/A	#N/A
ENSMUSG00000036006	193385	Fam65b	-0.834317	4.09251e-06	0.000137534	0.899545	1.16703e-05	7.96988e-05
ENSMUSG00000032232	68178	Cgnl1	-0.698491	4.15035e-06	0.000139163	#N/A	#N/A	#N/A
ENSMUSG00000022803	64082	Popdc2	-0.555804	4.1736e-06	0.000139628	#N/A	#N/A	#N/A
ENSMUSG00000057719	269016	Sh3rf2	0.830479	4.20774e-06	0.000140453	-0.792325	0.00271791	0.00994029
ENSMUSG00000030757	210162	Zkscan2	1.04251	4.26225e-06	0.000141954	#N/A	#N/A	#N/A
ENSMUSG00000003541	15937	Ier3	0.69878	4.27812e-06	0.000142164	1.61904	1.45233e-13	4.06756e-12
ENSMUSG00000020032	77976	Nuak1	-0.650314	4.39364e-06	0.000145677	1.37151	1.84797e-12	4.39617e-11
ENSMUSG00000027200	214968	Sema6d	-0.469043	4.55353e-06	0.000150642	#N/A	#N/A	#N/A
ENSMUSG00000039759	69876	Thap3	0.696436	4.65903e-06	0.000153789	#N/A	#N/A	#N/A
ENSMUSG00000037868	13654	Egr2	-1.28454	4.79972e-06	0.000158082	2.57946	1.05934e-10	1.94123e-09
ENSMUSG00000079012	20717	Serpina3m	1.17187	4.9367e-06	0.000162234	#N/A	#N/A	#N/A
ENSMUSG00000019873	28193	Reep3	-0.65987	5.00815e-06	0.000164219	#N/A	#N/A	#N/A
ENSMUSG00000029064	14688	Gnb1	-0.451064	5.21442e-06	0.000170606	#N/A	#N/A	#N/A
ENSMUSG00000031906	58994	Smpd3	-0.866337	5.24045e-06	0.00017108	1.10658	2.57635e-09	3.72675e-08
ENSMUSG00000044172	68509	Ptx4	-1.14887	5.3148e-06	0.000173127	-0.980823	0.00660995	0.0213344
ENSMUSG00000050222	239114	Il17d	-0.987533	5.36389e-06	0.000174344	#N/A	#N/A	#N/A
ENSMUSG00000039556	54646	Ppp1r3f	0.883159	5.4532e-06	0.00017686	#N/A	#N/A	#N/A
ENSMUSG00000039087	68750	Rreb1	0.621449	5.53671e-06	0.000179177	#N/A	#N/A	#N/A
ENSMUSG00000001891	216558	Ugp2	-0.5706	5.70184e-06	0.000183757	#N/A	#N/A	#N/A
ENSMUSG00000037405	15894	Icam1	-0.745959	5.71534e-06	0.000183757	0.622099	6.4682e-05	0.000372481
ENSMUSG00000031453	19414	Rasa3	-0.510859	5.7146e-06	0.000183757	0.727447	3.87249e-12	8.77617e-11
ENSMUSG00000031755	67378	Bbs2	0.553559	5.80242e-06	0.000185961	-0.745106	1.13705e-07	1.19262e-06
ENSMUSG00000028152	56224	Tspan5	-0.704767	5.8392e-06	0.000186528	#N/A	#N/A	#N/A
ENSMUSG00000001700	107022	Gramd3	-0.553738	6.03623e-06	0.000191996	#N/A	#N/A	#N/A
ENSMUSG00000074785	54712	Plxnc1	-0.577148	6.05844e-06	0.000192291	#N/A	#N/A	#N/A
ENSMUSG00000026679	71233	Enkur	-0.832724	6.09826e-06	0.000193142	#N/A	#N/A	#N/A
ENSMUSG00000034462	18764	Pkd2	-0.547832	6.62123e-06	0.000209259	#N/A	#N/A	#N/A
ENSMUSG00000062609	16516	Kcnj15	-1.18107	6.64927e-06	0.000209699	2.09755	2.50424e-14	7.80217e-13
ENSMUSG00000021047	664883	Nova1	0.707006	6.78018e-06	0.000213375	#N/A	#N/A	#N/A
ENSMUSG00000024011	74116	Pi16	-0.605289	6.84777e-06	0.000215046	#N/A	#N/A	#N/A
ENSMUSG00000038776	13849	Ephx1	-0.64707	6.93313e-06	0.00021681	#N/A	#N/A	#N/A
ENSMUSG00000032334	16949	Loxl1	-0.746961	7.14791e-06	0.000222589	1.12908	1.7063e-09	2.53792e-08
ENSMUSG00000022324	17181	Matn2	-0.640821	7.2061e-06	0.000223932	1.15469	3.83249e-15	1.34828e-13
ENSMUSG00000028567	66073	Txndc12	-0.608623	7.24448e-06	0.000224432	#N/A	#N/A	#N/A
ENSMUSG00000032186	50876	Tmod2	-0.59922	7.25242e-06	0.000224432	#N/A	#N/A	#N/A
ENSMUSG00000031207	17698	Msn	-0.500424	7.36536e-06	0.000227453	0.82045	3.65818e-12	8.31434e-11
ENSMUSG00000025355	58223	Mmp19	-0.830756	7.51423e-06	0.000231569	0.9388	5.10918e-07	4.67311e-06
ENSMUSG00000059408	80978	Mrgprh	0.73038	7.5882e-06	0.000233365	-0.916034	0.000593655	0.00265573
ENSMUSG00000028989	654812	Angptl7	-1.03047	7.66704e-06	0.000235302	1.47279	4.39498e-07	4.07041e-06
ENSMUSG00000022443	17886	Myh9	-0.613592	7.8923e-06	0.000241716	0.715427	1.17957e-09	1.80723e-08
ENSMUSG00000022199	59049	Slc22a17	0.698833	7.92554e-06	0.000242234	-0.740233	0.000790161	0.00340278
ENSMUSG00000046598	71911	Bdh1	0.743584	7.95989e-06	0.000242785	1.3912	4.36453e-05	0.000262937
ENSMUSG00000000001	14679	Gnai3	-0.535575	8.0163e-06	0.000244004	#N/A	#N/A	#N/A
ENSMUSG00000023826	50873	Park2	0.676538	8.04703e-06	0.000244439	#N/A	#N/A	#N/A
ENSMUSG00000005103	22388	Wdr1	-0.473542	8.19829e-06	0.000248525	0.982501	4.92539e-16	2.00004e-14
ENSMUSG00000029163	100952	Emilin1	-0.769976	8.23028e-06	0.000248987	1.46289	3.36933e-25	3.91338e-23
ENSMUSG00000045092	13609	S1pr1	-0.805243	8.25765e-06	0.000249307	#N/A	#N/A	#N/A
ENSMUSG00000037242	29876	Clic4	-0.464376	8.5969e-06	0.000259023	#N/A	#N/A	#N/A
ENSMUSG00000029484	11745	Anxa3	-0.88688	8.68377e-06	0.000261111	1.09774	9.49578e-09	1.22345e-07
ENSMUSG00000038267	73102	Slc22a23	0.646388	8.77903e-06	0.000263442	-0.944914	2.11237e-07	2.09197e-06
ENSMUSG00000049551	14371	Fzd9	1.09857	8.85967e-06	0.000265326	#N/A	#N/A	#N/A
ENSMUSG00000022951	54720	Rcan1	-0.70278	8.89336e-06	0.000265799	1.23068	2.37293e-07	2.33684e-06
ENSMUSG00000055723	66922	Rras2	-0.618975	8.92263e-06	0.000266138	0.800634	5.19082e-09	7.03816e-08
ENSMUSG00000020154	19263	Ptprb	-0.717082	9.11038e-06	0.000271193	#N/A	#N/A	#N/A
ENSMUSG00000039496	227526	Cdnf	0.571039	9.18253e-06	0.000272794	-0.665208	0.000434573	0.00202314
ENSMUSG00000046574	233210	Prr12	0.795071	9.23081e-06	0.000273443	#N/A	#N/A	#N/A
ENSMUSG00000054580	18779	Pla2r1	0.54148	9.24118e-06	0.000273443	#N/A	#N/A	#N/A
ENSMUSG00000053963	381310	6330403A02Rik	0.765427	9.35819e-06	0.000275807	-1.46222	7.19034e-06	5.14629e-05
ENSMUSG00000032202	11891	Rab27a	-0.726775	9.39098e-06	0.000276225	#N/A	#N/A	#N/A
ENSMUSG00000028776	94242	Tinagl1	-1.20432	9.43377e-06	0.000276935	0.861761	7.6519e-08	8.33582e-07
ENSMUSG00000042744	269700	Gm15800	0.572584	9.4608e-06	0.000277181	#N/A	#N/A	#N/A
ENSMUSG00000015850	229595	Adamtsl4	0.719298	9.75402e-06	0.000285209	#N/A	#N/A	#N/A
ENSMUSG00000035357	55983	Pdzrn3	-0.537072	9.84059e-06	0.000287175	#N/A	#N/A	#N/A
ENSMUSG00000038128	12326	Camk4	-0.987781	9.90028e-06	0.000288351	#N/A	#N/A	#N/A
ENSMUSG00000021555	78689	Naa35	0.504345	1.03013e-05	0.000298566	#N/A	#N/A	#N/A
ENSMUSG00000090841	17904	Myl6	-0.8308	1.03113e-05	0.000298566	1.1402	9.00342e-12	1.92187e-10
ENSMUSG00000030770	57342	Parva	-0.531364	1.02839e-05	0.000298566	#N/A	#N/A	#N/A
ENSMUSG00000027931	18160	Npr1	-0.492527	1.03767e-05	0.000299874	#N/A	#N/A	#N/A
ENSMUSG00000041261	12319	Car8	-0.787587	1.04262e-05	0.000300721	#N/A	#N/A	#N/A
ENSMUSG00000048065	320635	Cyb5r2	0.741508	1.06305e-05	0.000305426	-1.6473	4.41446e-13	1.14878e-11
ENSMUSG00000023055	67488	Calcoco1	0.559364	1.06616e-05	0.000305729	#N/A	#N/A	#N/A
ENSMUSG00000045761	320159	Fam179a	0.867505	1.0752e-05	0.000307136	-1.34623	5.99496e-07	5.42052e-06
ENSMUSG00000030513	18553	Pcsk6	-0.526817	1.07486e-05	0.000307136	#N/A	#N/A	#N/A
ENSMUSG00000019814	353258	Ltv1	-0.571713	1.07916e-05	0.000307477	#N/A	#N/A	#N/A
ENSMUSG00000022184	106052	Fbxo4	-0.620216	1.08054e-05	0.000307477	#N/A	#N/A	#N/A
ENSMUSG00000042286	192187	Stab1	-0.561585	1.08985e-05	0.000309534	#N/A	#N/A	#N/A
ENSMUSG00000040990	58194	Sh3kbp1	-0.641653	1.10858e-05	0.000313057	-0.767066	4.52834e-09	6.21457e-08
ENSMUSG00000008475	67771	Arpc5	-0.621681	1.10709e-05	0.000313057	0.793092	1.87658e-10	3.29361e-09
ENSMUSG00000032988	57274	Slc16a8	1.03629	1.15361e-05	0.000323315	-0.911198	0.012199	0.0357663
ENSMUSG00000024935	20510	Slc1a1	-1.03519	1.1526e-05	0.000323315	-0.815153	0.00552802	0.0182679
ENSMUSG00000034868	67938	Myl12b	-0.534085	1.17233e-05	0.000327943	0.624921	0.000167447	0.000867213
ENSMUSG00000036446	17022	Lum	-0.765818	1.17801e-05	0.000328296	1.04874	2.36588e-14	7.43283e-13
ENSMUSG00000003617	12870	Cp	-0.608071	1.17612e-05	0.000328296	-0.622876	2.03067e-06	1.63868e-05
ENSMUSG00000015843	20183	Rxrg	0.499662	1.19548e-05	0.00033254	-0.63346	1.2907e-05	8.74915e-05
ENSMUSG00000021025	18035	Nfkbia	-0.910278	1.21627e-05	0.000337692	#N/A	#N/A	#N/A
ENSMUSG00000021750	268709	Fam107a	-1.20856	1.22694e-05	0.000340017	#N/A	#N/A	#N/A
ENSMUSG00000006699	12540	Cdc42	-0.506209	1.23885e-05	0.00034268	#N/A	#N/A	#N/A
ENSMUSG00000037656	20516	Slc20a2	0.426366	1.26186e-05	0.000348396	-1.09724	1.59584e-21	1.28611e-19
ENSMUSG00000030213	54343	Atf7ip	0.458405	1.28819e-05	0.000355005	-0.678691	2.37889e-05	0.000152814
ENSMUSG00000034614	216505	Pik3ip1	0.667507	1.32368e-05	0.00036411	-0.929217	1.17326e-07	1.22978e-06
ENSMUSG00000060594	244864	Layn	-0.707242	1.33785e-05	0.000367327	#N/A	#N/A	#N/A
ENSMUSG00000026509	12334	Capn2	-0.483675	1.34848e-05	0.000369563	#N/A	#N/A	#N/A
ENSMUSG00000038879	223473	Nipal2	-1.07556	1.35159e-05	0.000369732	1.00266	0.00307247	0.0110427
ENSMUSG00000047250	19224	Ptgs1	-0.739261	1.35488e-05	0.000369951	#N/A	#N/A	#N/A
ENSMUSG00000046223	18793	Plaur	-1.12756	1.36829e-05	0.000372927	1.18811	4.39723e-05	0.000264806
ENSMUSG00000042793	329252	Lgr6	0.505463	1.37915e-05	0.000375198	-1.80001	4.03343e-25	4.65051e-23
ENSMUSG00000045312	218454	Lhfpl2	-0.800297	1.39239e-05	0.00037811	1.43359	3.3113e-13	8.73211e-12
ENSMUSG00000020484	22433	Xbp1	-0.457378	1.40788e-05	0.000381294	#N/A	#N/A	#N/A
ENSMUSG00000040860	230872	Crocc	0.8039	1.41182e-05	0.000381294	#N/A	#N/A	#N/A
ENSMUSG00000079419	73656	Ms4a6c	-0.86569	1.41764e-05	0.00038217	1.50459	5.26791e-18	2.8893e-16
ENSMUSG00000022246	75646	Rai14	-0.761746	1.4487e-05	0.000389836	#N/A	#N/A	#N/A
ENSMUSG00000054252	14184	Fgfr3	-0.819119	1.48495e-05	0.000398813	#N/A	#N/A	#N/A
ENSMUSG00000001175	12313	Calm1	-0.446006	1.48832e-05	0.000398813	#N/A	#N/A	#N/A
ENSMUSG00000030265	16653	Kras	-0.553356	1.49046e-05	0.000398813	#N/A	#N/A	#N/A
ENSMUSG00000000530	11482	Acvrl1	-0.602058	1.49548e-05	0.000398813	#N/A	#N/A	#N/A
ENSMUSG00000036438	12313	Calm2	-0.446006	1.48832e-05	0.000398813	#N/A	#N/A	#N/A
ENSMUSG00000073096	243371	Lrrc61	0.696141	1.49533e-05	0.000398813	-0.672107	0.000659319	0.00290181
ENSMUSG00000019370	12313	Calm3	-0.446006	1.48832e-05	0.000398813	#N/A	#N/A	#N/A
ENSMUSG00000041329	11932	Atp1b2	0.819409	1.5147e-05	0.000403213	#N/A	#N/A	#N/A
ENSMUSG00000090231	14962	Cfb	0.947403	1.52274e-05	0.000404629	1.71903	2.53408e-16	1.08185e-14
ENSMUSG00000093620	14962	CT025759.1	0.947403	1.52274e-05	0.000404629	#N/A	#N/A	#N/A
ENSMUSG00000035944	239570	Ttc38	0.455844	1.53735e-05	0.000407782	#N/A	#N/A	#N/A
ENSMUSG00000030091	54563	Nup210	0.659207	1.54125e-05	0.000408087	#N/A	#N/A	#N/A
ENSMUSG00000053199	244867	Arhgap20	0.565167	1.60383e-05	0.000423902	#N/A	#N/A	#N/A
ENSMUSG00000014776	78688	Nol3	0.668879	1.61072e-05	0.000424967	#N/A	#N/A	#N/A
ENSMUSG00000025935	72265	Tram1	-0.53775	1.62705e-05	0.000428515	#N/A	#N/A	#N/A
ENSMUSG00000040998	114249	Npnt	-1.08992	1.66119e-05	0.000436699	#N/A	#N/A	#N/A
ENSMUSG00000040312	240084	Cchcr1	0.886708	1.66401e-05	0.000436699	#N/A	#N/A	#N/A
ENSMUSG00000020349	19052	Ppp2ca	-0.539144	1.67165e-05	0.000437932	#N/A	#N/A	#N/A
ENSMUSG00000068196	12837	Col8a1	-0.850987	1.68527e-05	0.000440721	2.59965	8.26803e-41	3.26505e-38
ENSMUSG00000038007	230379	Acer2	-0.847681	1.69041e-05	0.000441289	#N/A	#N/A	#N/A
ENSMUSG00000021943	14560	Gdf10	-1.0864	1.70004e-05	0.000443023	0.954851	0.00506882	0.0169705
ENSMUSG00000022856	66664	Tmem41a	0.649041	1.73621e-05	0.000451659	#N/A	#N/A	#N/A
ENSMUSG00000030342	12527	Cd9	-0.760951	1.74887e-05	0.000454155	#N/A	#N/A	#N/A
ENSMUSG00000040260	76441	Daam2	0.650568	1.82933e-05	0.00047422	-1.25203	3.11414e-09	4.42763e-08
ENSMUSG00000027074	58207	Slc43a3	-0.643537	1.83755e-05	0.000475521	#N/A	#N/A	#N/A
ENSMUSG00000050587	241568	Lrrc4c	0.873821	1.84612e-05	0.000476908	#N/A	#N/A	#N/A
ENSMUSG00000033453	235130	Adamts15	-0.858485	1.85014e-05	0.000477115	-0.85194	1.67833e-06	1.38728e-05
ENSMUSG00000027533	16592	Fabp5	-1.10576	1.85334e-05	0.000477115	0.798649	0.000646037	0.00285369
ENSMUSG00000032116	16430	Stt3a	-0.479256	1.86213e-05	0.000478548	#N/A	#N/A	#N/A
ENSMUSG00000058396	11536	Gpr182	-0.89381	1.88615e-05	0.000483885	#N/A	#N/A	#N/A
ENSMUSG00000025221	80906	Kcnip2	-0.789688	1.91187e-05	0.000489222	-1.07556	0.00037386	0.00177823
ENSMUSG00000039745	53415	Htatip2	0.700532	1.91675e-05	0.000489222	#N/A	#N/A	#N/A
ENSMUSG00000020919	20851	Stat5b	0.47484	1.93744e-05	0.000493631	-1.28657	2.10536e-38	6.9284e-36
ENSMUSG00000030237	28250	Slco1a4	-1.05204	1.97105e-05	0.000501336	#N/A	#N/A	#N/A
ENSMUSG00000050010	330096	Shisa3	-1.14942	1.98314e-05	0.000503547	1.41637	0.000370073	0.00176333
ENSMUSG00000025981	67876	Coq10b	-0.709194	2.01046e-05	0.000509592	0.774258	3.08891e-05	0.000194006
ENSMUSG00000037490	353169	Slc2a12	0.571366	2.0138e-05	0.000509592	-0.624972	0.00253354	0.00934606
ENSMUSG00000023022	65970	Lima1	-0.482846	2.03251e-05	0.00051345	#N/A	#N/A	#N/A
ENSMUSG00000028955	22319	Vamp3	-0.52153	2.06646e-05	0.000521141	#N/A	#N/A	#N/A
ENSMUSG00000025016	107358	Tm9sf3	-0.537439	2.10486e-05	0.000529925	#N/A	#N/A	#N/A
ENSMUSG00000030659	53322	Nucb2	-0.6963	2.12159e-05	0.000533234	#N/A	#N/A	#N/A
ENSMUSG00000034463	219151	Scara3	-0.587058	2.16737e-05	0.00054382	0.752967	2.95722e-05	0.000186304
ENSMUSG00000068874	20341	Selenbp1	0.460132	2.20557e-05	0.00055247	-0.586591	7.934e-05	0.000444574
ENSMUSG00000028656	12331	Cap1	-0.507523	2.21073e-05	0.00055283	0.620299	1.25339e-06	1.06443e-05
ENSMUSG00000059456	19229	Ptk2b	0.510833	2.24819e-05	0.000561253	#N/A	#N/A	#N/A
ENSMUSG00000037419	71946	Endod1	-0.537493	2.2749e-05	0.00056697	0.813172	6.50113e-10	1.04044e-08
ENSMUSG00000028307	230163	Aldob	1.10002	2.29468e-05	0.000569985	-2.01225	1.07884e-05	7.42863e-05
ENSMUSG00000006587	30927	Snai3	1.13906	2.29367e-05	0.000569985	#N/A	#N/A	#N/A
ENSMUSG00000004655	11826	Aqp1	-0.657805	2.30622e-05	0.000571896	#N/A	#N/A	#N/A
ENSMUSG00000040950	216864	Mgl2	-0.658756	2.33302e-05	0.000577579	#N/A	#N/A	#N/A
ENSMUSG00000048154	381022	Mll2	0.740916	2.34235e-05	0.000578923	#N/A	#N/A	#N/A
ENSMUSG00000029659	70717	6330406I15Rik	-0.579647	2.3823e-05	0.000587819	#N/A	#N/A	#N/A
ENSMUSG00000040522	170744	Tlr8	-0.813835	2.41458e-05	0.000594796	1.30242	3.62756e-13	9.53427e-12
ENSMUSG00000071540	100504518	3425401B19Rik	0.572736	2.44591e-05	0.000601516	-0.607171	0.00147503	0.00583365
ENSMUSG00000042626	20416	Shc1	-0.475239	2.46814e-05	0.00060598	#N/A	#N/A	#N/A
ENSMUSG00000054808	60595	Actn4	-0.743987	2.4796e-05	0.000607788	0.98528	2.96242e-10	5.02626e-09
ENSMUSG00000074001	72330	Kbtbd5	0.779027	2.50021e-05	0.00061183	-0.843462	2.58812e-08	3.07846e-07
ENSMUSG00000022579	68453	Gpihbp1	-0.729661	2.51262e-05	0.000613856	#N/A	#N/A	#N/A
ENSMUSG00000062421	11841	Arf2	-0.493963	2.53217e-05	0.000617617	0.661276	1.28886e-09	1.96135e-08
ENSMUSG00000029447	12466	Cct6a	-0.451524	2.54558e-05	0.00061987	#N/A	#N/A	#N/A
ENSMUSG00000024901	240518	Peli3	0.898455	2.58013e-05	0.00062623	#N/A	#N/A	#N/A
ENSMUSG00000057561	13664	Eif1a	-0.589721	2.57739e-05	0.00062623	0.733004	1.96506e-05	0.00012853
ENSMUSG00000045441	243385	Gprin3	0.956746	2.59885e-05	0.000629743	-2.12041	5.68896e-11	1.0853e-09
ENSMUSG00000023828	20519	Slc22a3	0.551289	2.609e-05	0.000631175	#N/A	#N/A	#N/A
ENSMUSG00000043019	66967	Edem3	-0.465474	2.64526e-05	0.000638906	#N/A	#N/A	#N/A
ENSMUSG00000033590	208943	Myo5c	0.844424	2.69851e-05	0.000649653	-1.4615	6.82048e-05	0.000389925
ENSMUSG00000041912	72634	Tdrkh	0.744582	2.7129e-05	0.000652061	-0.927131	0.000525529	0.00239436
ENSMUSG00000031808	26457	Slc27a1	0.596211	2.74374e-05	0.000656351	#N/A	#N/A	#N/A
ENSMUSG00000034771	21886	Tle2	0.713173	2.7391e-05	0.000656351	#N/A	#N/A	#N/A
ENSMUSG00000031502	12826	Col4a1	-0.711398	2.744e-05	0.000656351	1.40624	1.19525e-16	5.30342e-15
ENSMUSG00000048217	217214	Nags	1.15325	2.75329e-05	0.000657513	#N/A	#N/A	#N/A
ENSMUSG00000078307	330941	AI593442	1.18045	2.85833e-05	0.000681504	1.58811	0.00034047	0.00163766
ENSMUSG00000027238	228564	Frmd5	-0.807934	2.86925e-05	0.000683011	#N/A	#N/A	#N/A
ENSMUSG00000031375	12111	Bgn	-0.620645	2.88007e-05	0.000684488	1.32844	8.17097e-14	2.36389e-12
ENSMUSG00000027204	14118	Fbn1	-0.756809	2.89582e-05	0.000687134	1.7205	6.10545e-23	5.88059e-21
ENSMUSG00000035530	20918	Eif1	0.742663	2.90254e-05	0.00068763	#N/A	#N/A	#N/A
ENSMUSG00000058355	24015	Abce1	-0.498011	2.92156e-05	0.000691033	#N/A	#N/A	#N/A
ENSMUSG00000030793	66824	Pycard	0.744446	2.93405e-05	0.000692884	#N/A	#N/A	#N/A
ENSMUSG00000020057	71712	Dram1	-0.67121	2.94239e-05	0.000693015	0.598159	0.00124168	0.0050124
ENSMUSG00000026181	68606	Ppm1f	-0.571796	2.94394e-05	0.000693015	#N/A	#N/A	#N/A
ENSMUSG00000029840	14489	Mtpn	-0.593155	2.96017e-05	0.000695734	#N/A	#N/A	#N/A
ENSMUSG00000025314	19271	Ptprj	-0.513202	3.07358e-05	0.000721247	0.610645	1.17532e-06	1.00353e-05
ENSMUSG00000040435	17872	Ppp1r15a	-0.729768	3.08767e-05	0.00072341	#N/A	#N/A	#N/A
ENSMUSG00000031232	67075	Magt1	-0.459778	3.2454e-05	0.000757973	#N/A	#N/A	#N/A
ENSMUSG00000060591	80876	Ifitm2	-0.687781	3.24416e-05	0.000757973	#N/A	#N/A	#N/A
ENSMUSG00000003161	109552	Sri	-0.522445	3.29567e-05	0.000767302	#N/A	#N/A	#N/A
ENSMUSG00000036867	17130	Smad6	-0.808009	3.30881e-05	0.000769157	#N/A	#N/A	#N/A
ENSMUSG00000015605	20807	Srf	-0.622282	3.33219e-05	0.00077338	#N/A	#N/A	#N/A
ENSMUSG00000061315	17938	Naca	0.749443	3.34771e-05	0.000774562	#N/A	#N/A	#N/A
ENSMUSG00000026639	16780	Lamb3	0.516158	3.34688e-05	0.000774562	-2.71725	5.67465e-29	9.95965e-27
ENSMUSG00000030137	53857	Tuba8	-0.751756	3.35488e-05	0.000775014	#N/A	#N/A	#N/A
ENSMUSG00000030207	74525	8430419L09Rik	0.649447	3.40255e-05	0.000783589	#N/A	#N/A	#N/A
ENSMUSG00000044583	170743	Tlr7	-0.842427	3.40084e-05	0.000783589	0.784675	9.58231e-06	6.665e-05
ENSMUSG00000052676	215693	Zmat1	0.74758	3.41481e-05	0.000785195	-0.95137	6.4776e-05	0.000372887
ENSMUSG00000027993	80890	Trim2	-0.534931	3.45937e-05	0.000794212	#N/A	#N/A	#N/A
ENSMUSG00000020773	217333	Trim47	-0.676079	3.48957e-05	0.000799908	1.10692	5.60901e-16	2.24873e-14
ENSMUSG00000025810	18186	Nrp1	-0.518842	3.56853e-05	0.000816748	0.678483	4.55184e-07	4.20473e-06
ENSMUSG00000003273	12348	Car11	0.652845	3.58711e-05	0.000819737	#N/A	#N/A	#N/A
ENSMUSG00000030930	77590	Chst15	-0.67801	3.61298e-05	0.000824381	#N/A	#N/A	#N/A
ENSMUSG00000016918	240725	Sulf1	-0.601578	3.64164e-05	0.000829646	#N/A	#N/A	#N/A
ENSMUSG00000028978	18127	Nos3	-0.718795	3.71456e-05	0.000844963	#N/A	#N/A	#N/A
ENSMUSG00000020135	23805	Apc2	0.826054	3.73061e-05	0.000847317	-0.830911	1.46794e-06	1.22686e-05
ENSMUSG00000047821	94092	Trim16	-0.672122	3.76595e-05	0.000854038	#N/A	#N/A	#N/A
ENSMUSG00000006281	21745	Tep1	0.449012	3.82249e-05	0.000865538	#N/A	#N/A	#N/A
ENSMUSG00000060671	54667	Atp8b2	-0.492225	3.86581e-05	0.000874015	0.767221	1.95428e-08	2.3801e-07
ENSMUSG00000049791	14366	Fzd4	-0.648995	3.88283e-05	0.000876528	#N/A	#N/A	#N/A
ENSMUSG00000024909	58859	Efemp2	-0.624595	3.96194e-05	0.000893029	1.29295	3.67194e-14	1.11115e-12
ENSMUSG00000037855	216049	Zfp365	-0.980715	4.01218e-05	0.000902984	1.32822	6.94774e-08	7.62658e-07
ENSMUSG00000042734	69480	Ttc9	-0.986032	4.0333e-05	0.000906364	0.852113	3.24097e-05	0.000202269
ENSMUSG00000024743	54525	Syt7	0.54431	4.03998e-05	0.000906492	-0.989321	8.95421e-07	7.80578e-06
ENSMUSG00000023927	20230	Satb1	0.603379	4.0526e-05	0.000906586	-0.606641	0.00318041	0.0113712
ENSMUSG00000040327	78309	Cul9	0.541975	4.04874e-05	0.000906586	#N/A	#N/A	#N/A
ENSMUSG00000042354	30877	Gnl3	-0.594907	4.06181e-05	0.000907281	#N/A	#N/A	#N/A
ENSMUSG00000037139	242702	Myom3	0.678376	4.06986e-05	0.000907713	-0.653568	0.00778737	0.0245234
ENSMUSG00000021477	13039	Ctsl	-0.391437	4.13407e-05	0.000917899	#N/A	#N/A	#N/A
ENSMUSG00000057329	12043	Bcl2	-0.536802	4.1824e-05	0.000924484	#N/A	#N/A	#N/A
ENSMUSG00000057606	382864	Colq	-1.14318	4.17914e-05	0.000924484	#N/A	#N/A	#N/A
ENSMUSG00000022146	18414	Osmr	-0.684515	4.19845e-05	0.000926653	#N/A	#N/A	#N/A
ENSMUSG00000054958	230718	Nt5c1a	0.573831	4.22169e-05	0.000930401	#N/A	#N/A	#N/A
ENSMUSG00000034487	68304	Kdelc2	-0.507913	4.26676e-05	0.000937551	#N/A	#N/A	#N/A
ENSMUSG00000034687	231470	Fras1	0.49552	4.27342e-05	0.000937627	-0.732296	3.16019e-07	3.03639e-06
ENSMUSG00000030731	20981	Syt3	0.852631	4.30423e-05	0.000942374	#N/A	#N/A	#N/A
ENSMUSG00000052496	18766	Pkdrej	0.576471	4.32081e-05	0.00094255	-1.46577	1.19132e-10	2.16299e-09
ENSMUSG00000028690	67096	Mmachc	-0.475051	4.32123e-05	0.00094255	#N/A	#N/A	#N/A
ENSMUSG00000034472	75141	Rasd2	0.897169	4.36455e-05	0.00094921	#N/A	#N/A	#N/A
ENSMUSG00000024759	109168	Atl3	-0.535064	4.35932e-05	0.00094921	#N/A	#N/A	#N/A
ENSMUSG00000039376	68760	Synpo2l	-0.591645	4.39141e-05	0.000953655	#N/A	#N/A	#N/A
ENSMUSG00000021036	20773	Sptlc2	-0.565523	4.48615e-05	0.000972807	#N/A	#N/A	#N/A
ENSMUSG00000051790	216856	Nlgn2	0.673259	4.4966e-05	0.000973653	#N/A	#N/A	#N/A
ENSMUSG00000001435	12822	Col18a1	-0.64985	4.5163e-05	0.000976493	1.14062	2.80407e-07	2.73077e-06
ENSMUSG00000037060	109042	Prkcdbp	-0.530765	4.58099e-05	0.000989041	0.767801	5.44416e-08	6.06255e-07
ENSMUSG00000034401	67946	Spata6	-0.620278	4.63495e-05	0.000998028	#N/A	#N/A	#N/A
ENSMUSG00000032932	110920	Hspa13	-0.470332	4.63605e-05	0.000998028	#N/A	#N/A	#N/A
ENSMUSG00000039763	246738	Dnajc28	0.476165	4.68024e-05	0.00100318	-1.16466	2.89704e-11	5.80732e-10
ENSMUSG00000017774	17913	Myo1c	-0.549002	4.67722e-05	0.00100318	0.757707	5.45977e-13	1.39101e-11
ENSMUSG00000042485	66175	Mustn1	-0.7421	4.66755e-05	0.00100318	#N/A	#N/A	#N/A
ENSMUSG00000022867	30940	Usp25	-0.427552	4.71476e-05	0.00100767	#N/A	#N/A	#N/A
ENSMUSG00000045657	93881	Pcdhb10	-1.13086	4.71145e-05	0.00100767	#N/A	#N/A	#N/A
ENSMUSG00000028909	19273	Ptpru	0.561223	4.78022e-05	0.00102019	-1.30831	7.97289e-08	8.65697e-07
ENSMUSG00000052512	78286	Nav2	0.525237	4.83509e-05	0.00102895	#N/A	#N/A	#N/A
ENSMUSG00000022987	239652	Zfp641	0.54131	4.88362e-05	0.00103779	#N/A	#N/A	#N/A
ENSMUSG00000028132	99887	Tmem56	0.78089	4.94414e-05	0.00104915	#N/A	#N/A	#N/A
ENSMUSG00000030711	20887	Sult1a1	-0.765226	5.0068e-05	0.00106093	#N/A	#N/A	#N/A
ENSMUSG00000025903	18777	Lypla1	-0.442334	5.04267e-05	0.00106701	#N/A	#N/A	#N/A
ENSMUSG00000040322	229731	Slc25a24	-0.572028	5.12634e-05	0.00108312	#N/A	#N/A	#N/A
ENSMUSG00000038670	233199	Mybpc2	-0.583394	5.20349e-05	0.00109635	#N/A	#N/A	#N/A
ENSMUSG00000044072	237711	Eml6	0.469249	5.22878e-05	0.00110012	-1.16966	2.3053e-13	6.25678e-12
ENSMUSG00000044147	11845	Arf6	-0.538506	5.24095e-05	0.00110112	0.609377	5.81514e-06	4.24081e-05
ENSMUSG00000039116	215798	Gpr126	-0.57036	5.26671e-05	0.00110497	#N/A	#N/A	#N/A
ENSMUSG00000023036	93716	Pcdhga9	0.726025	5.28984e-05	0.00110825	-0.768724	6.22492e-06	4.52087e-05
ENSMUSG00000032575	74840	Manf	-0.500322	5.30892e-05	0.00110912	0.703209	7.7246e-05	0.000434072
ENSMUSG00000021365	18003	Nedd9	-0.85358	5.30434e-05	0.00110912	1.01974	2.72316e-15	9.79842e-14
ENSMUSG00000006782	12799	Cnp	0.528032	5.35233e-05	0.00111506	#N/A	#N/A	#N/A
ENSMUSG00000028933	57434	Xrcc2	0.629317	5.34829e-05	0.00111506	#N/A	#N/A	#N/A
ENSMUSG00000003131	18475	Pafah1b2	-0.474491	5.38028e-05	0.00111865	#N/A	#N/A	#N/A
ENSMUSG00000052566	170833	Hook2	0.794281	5.38466e-05	0.00111865	#N/A	#N/A	#N/A
ENSMUSG00000033032	106877	Afap1l1	-0.385303	5.39503e-05	0.00111924	#N/A	#N/A	#N/A
ENSMUSG00000025656	236915	Arhgef9	0.484062	5.47266e-05	0.00113376	#N/A	#N/A	#N/A
ENSMUSG00000070733	72313	Fryl	0.429303	5.4944e-05	0.00113668	#N/A	#N/A	#N/A
ENSMUSG00000026064	19243	Ptp4a1	-0.815702	5.56412e-05	0.00114951	#N/A	#N/A	#N/A
ENSMUSG00000055980	16367	Irs1	-0.476945	5.5932e-05	0.00115391	#N/A	#N/A	#N/A
ENSMUSG00000031838	65972	Ifi30	-0.605637	5.61889e-05	0.0011576	1.18465	3.14346e-11	6.23795e-10
ENSMUSG00000042613	229534	Pbxip1	0.444608	5.65168e-05	0.00116274	#N/A	#N/A	#N/A
ENSMUSG00000021094	66375	Dhrs7	0.537033	5.66147e-05	0.00116315	#N/A	#N/A	#N/A
ENSMUSG00000024529	16948	Lox	-0.852786	5.71029e-05	0.00117046	2.37315	3.17323e-21	2.46918e-19
ENSMUSG00000024772	13660	Ehd1	-0.598747	5.71283e-05	0.00117046	#N/A	#N/A	#N/A
ENSMUSG00000020077	19073	Srgn	-0.629214	5.74163e-05	0.00117474	#N/A	#N/A	#N/A
ENSMUSG00000023153	69671	Tmem52	-1.11634	5.75818e-05	0.00117651	#N/A	#N/A	#N/A
ENSMUSG00000027852	18176	Nras	-0.44134	5.76931e-05	0.00117716	#N/A	#N/A	#N/A
ENSMUSG00000053877	100043597	Srcap	0.543897	5.80389e-05	0.00118259	#N/A	#N/A	#N/A
ENSMUSG00000027940	59069	Tpm3	-0.582145	5.82141e-05	0.00118454	0.912731	1.90678e-07	1.90629e-06
ENSMUSG00000043621	212190	Ubxn10	0.871116	5.86177e-05	0.00119112	-0.98609	0.000421876	0.00197334
ENSMUSG00000031811	76454	Fbxo31	0.57874	5.92047e-05	0.0012014	-0.684372	4.79799e-05	0.000286971
ENSMUSG00000054453	236643	Sytl5	-1.0665	6.09219e-05	0.00123456	#N/A	#N/A	#N/A
ENSMUSG00000031007	70495	Atp6ap2	-0.514243	6.13211e-05	0.00123931	#N/A	#N/A	#N/A
ENSMUSG00000001864	108897	Aif1l	-0.648649	6.1323e-05	0.00123931	-1.9667	6.02006e-37	1.76098e-34
ENSMUSG00000029648	14254	Flt1	-0.532724	6.19182e-05	0.00124794	#N/A	#N/A	#N/A
ENSMUSG00000036523	268527	Greb1	1.03977	6.18703e-05	0.00124794	-1.18657	0.00113478	0.00464858
ENSMUSG00000020823	74136	Sec14l1	-0.498382	6.27402e-05	0.00126279	#N/A	#N/A	#N/A
ENSMUSG00000050705	69662	2310061I04Rik	0.563875	6.40433e-05	0.00128554	#N/A	#N/A	#N/A
ENSMUSG00000035765	69190	Dym	0.413136	6.44294e-05	0.00129154	#N/A	#N/A	#N/A
ENSMUSG00000028943	56226	Espn	0.827743	6.45796e-05	0.00129281	#N/A	#N/A	#N/A
ENSMUSG00000045838	214239	A430105I19Rik	0.489171	6.48449e-05	0.00129637	#N/A	#N/A	#N/A
ENSMUSG00000020357	14257	Flt4	-0.618318	6.53345e-05	0.00130441	#N/A	#N/A	#N/A
ENSMUSG00000053693	56527	Mast1	0.966701	6.55363e-05	0.00130668	#N/A	#N/A	#N/A
ENSMUSG00000021493	67399	Pdlim7	-0.650275	6.57783e-05	0.00130853	0.676712	6.67361e-05	0.000382498
ENSMUSG00000020524	14799	Gria1	-1.01196	6.58055e-05	0.00130853	#N/A	#N/A	#N/A
ENSMUSG00000035900	223752	Gramd4	0.571915	6.66248e-05	0.00132306	#N/A	#N/A	#N/A
ENSMUSG00000021583	80898	Erap1	-0.47203	6.69304e-05	0.00132585	#N/A	#N/A	#N/A
ENSMUSG00000024867	18719	Pip5k1b	-0.426847	6.70336e-05	0.00132585	#N/A	#N/A	#N/A
ENSMUSG00000003518	72349	Dusp3	-0.413905	6.79285e-05	0.00134177	#N/A	#N/A	#N/A
ENSMUSG00000031246	56726	Sh3bgrl	-0.711577	6.80613e-05	0.00134261	#N/A	#N/A	#N/A
ENSMUSG00000022261	15529	Sdc2	-0.498428	6.82755e-05	0.00134505	0.677997	5.79238e-06	4.23203e-05
ENSMUSG00000020721	78455	Helz	0.473312	6.98332e-05	0.00137223	#N/A	#N/A	#N/A
ENSMUSG00000005268	19116	Prlr	0.753908	6.98403e-05	0.00137223	-1.80165	4.9041e-22	4.27984e-20
ENSMUSG00000013275	98396	Slc41a1	0.425575	7.01452e-05	0.00137506	#N/A	#N/A	#N/A
ENSMUSG00000038486	64051	Sv2a	0.520987	7.01694e-05	0.00137506	#N/A	#N/A	#N/A
ENSMUSG00000021796	12166	Bmpr1a	-0.476391	7.40381e-05	0.00144896	#N/A	#N/A	#N/A
ENSMUSG00000053226	23863	Dand5	0.73391	7.45529e-05	0.00145688	#N/A	#N/A	#N/A
ENSMUSG00000071669	74478	Snx29	0.575506	7.46388e-05	0.00145688	#N/A	#N/A	#N/A
ENSMUSG00000032997	74241	Chpf	-0.615728	7.62942e-05	0.00148724	0.888798	6.15312e-10	9.88756e-09
ENSMUSG00000040441	216441	Slc26a10	0.797086	7.65775e-05	0.0014908	-1.31018	0.000854188	0.00364029
ENSMUSG00000074793	72630	Hspa12b	-0.596718	7.81733e-05	0.00151988	#N/A	#N/A	#N/A
ENSMUSG00000001027	110880	Scn4a	0.540167	7.84324e-05	0.00152093	-0.791216	0.00102838	0.00426921
ENSMUSG00000073557	329251	Ppp1r12b	0.37438	7.83314e-05	0.00152093	#N/A	#N/A	#N/A
ENSMUSG00000035024	78658	Ncapd3	0.408567	7.87722e-05	0.00152354	#N/A	#N/A	#N/A
ENSMUSG00000021221	70127	Dpf3	0.539439	7.87037e-05	0.00152354	-1.60103	3.15926e-17	1.55949e-15
ENSMUSG00000015961	11566	Adss	-0.631831	7.94331e-05	0.00153433	#N/A	#N/A	#N/A
ENSMUSG00000073643	69368	Wdfy1	-0.464128	7.95678e-05	0.00153494	#N/A	#N/A	#N/A
ENSMUSG00000043631	407800	Ecm2	-0.480791	8.01124e-05	0.00154344	-0.655846	2.28173e-08	2.73877e-07
ENSMUSG00000032050	19684	Rdx	-0.475189	8.07701e-05	0.00155409	#N/A	#N/A	#N/A
ENSMUSG00000062014	63985	Gmfb	-0.571442	8.22582e-05	0.00158068	#N/A	#N/A	#N/A
ENSMUSG00000026434	98415	Nucks1	-0.474864	8.30067e-05	0.001593	#N/A	#N/A	#N/A
ENSMUSG00000047793	208777	Sned1	0.488038	8.34699e-05	0.00159982	-0.94559	1.00761e-05	6.96554e-05
ENSMUSG00000034998	14236	Foxn2	-0.592378	8.36915e-05	0.001602	#N/A	#N/A	#N/A
ENSMUSG00000033684	104009	Qsox1	-0.516716	8.41099e-05	0.00160466	1.05527	6.30869e-21	4.76804e-19
ENSMUSG00000023800	24001	Tiam2	-0.645865	8.41544e-05	0.00160466	#N/A	#N/A	#N/A
ENSMUSG00000043257	230801	Pigv	0.6686	8.40671e-05	0.00160466	#N/A	#N/A	#N/A
ENSMUSG00000040666	50795	Sh3bgr	-0.566209	8.53341e-05	0.00162507	0.809282	5.13383e-06	3.79654e-05
ENSMUSG00000055044	54132	Pdlim1	-0.564419	8.58151e-05	0.00163005	0.894432	8.45231e-10	1.32585e-08
ENSMUSG00000023036	93711	Pcdhga9	0.644878	8.57863e-05	0.00163005	-0.768724	6.22492e-06	4.52087e-05
ENSMUSG00000032637	233871	Atxn2l	0.48875	8.85218e-05	0.00167503	#N/A	#N/A	#N/A
ENSMUSG00000002985	11816	Apoe	-0.515108	8.84139e-05	0.00167503	#N/A	#N/A	#N/A
ENSMUSG00000046768	80837	Rhoj	-0.683238	9.06382e-05	0.0017129	#N/A	#N/A	#N/A
ENSMUSG00000007646	114714	Rad51c	0.880575	9.07637e-05	0.00171309	#N/A	#N/A	#N/A
ENSMUSG00000068699	68794	Flnc	-0.714556	9.1306e-05	0.00171932	0.70969	3.47262e-07	3.30841e-06
ENSMUSG00000023991	74123	Foxp4	0.622439	9.14031e-05	0.00171932	#N/A	#N/A	#N/A
ENSMUSG00000006445	13836	Epha2	-0.799882	9.14408e-05	0.00171932	1.17363	5.16811e-20	3.534e-18
ENSMUSG00000046434	15382	Hnrnpa1	-0.745424	9.25964e-05	0.00173885	#N/A	#N/A	#N/A
ENSMUSG00000036833	241274	Pnpla7	0.411677	9.35503e-05	0.00175454	#N/A	#N/A	#N/A
ENSMUSG00000025134	21681	Alyref	-0.584465	9.39932e-05	0.00176062	#N/A	#N/A	#N/A
ENSMUSG00000027479	13589	Mapre1	-0.440398	9.47114e-05	0.00177116	#N/A	#N/A	#N/A
ENSMUSG00000038587	83397	Akap12	-0.566997	9.47941e-05	0.00177116	#N/A	#N/A	#N/A
ENSMUSG00000000555	16402	Itga5	-0.601695	9.49538e-05	0.00177192	1.0846	1.67599e-08	2.07965e-07
ENSMUSG00000061100	57262	Retnla	-0.650043	9.60578e-05	0.00179027	#N/A	#N/A	#N/A
ENSMUSG00000009545	16535	Kcnq1	0.519194	9.78161e-05	0.00182075	#N/A	#N/A	#N/A
ENSMUSG00000028088	14263	Fmo5	0.567112	9.91381e-05	0.00184305	-0.857953	9.41724e-06	6.57625e-05
ENSMUSG00000030878	12585	Cdr2	-0.542689	9.96091e-05	0.00184949	#N/A	#N/A	#N/A
ENSMUSG00000027408	56264	Cpxm1	-0.630472	0.000100029	0.00185497	0.600287	0.0035789	0.0125627
ENSMUSG00000029622	11867	Arpc1b	-0.582824	0.000100733	0.0018657	0.871546	3.75033e-11	7.35904e-10
ENSMUSG00000021495	212483	Fam193b	0.501557	0.000102877	0.00190135	#N/A	#N/A	#N/A
ENSMUSG00000053024	21367	Cntn2	-0.846385	0.000102914	0.00190135	#N/A	#N/A	#N/A
ENSMUSG00000033732	101943	Sf3b3	-0.376355	0.000103281	0.00190425	#N/A	#N/A	#N/A
ENSMUSG00000024247	106522	Pkdcc	-0.57611	0.000103456	0.00190425	1.49845	2.37465e-15	8.70301e-14
ENSMUSG00000026604	19250	Ptpn14	-0.570362	0.000103414	0.00190425	#N/A	#N/A	#N/A
ENSMUSG00000039239	21808	Tgfb2	-0.509294	0.000104044	0.00191271	1.11869	9.44267e-10	1.46807e-08
ENSMUSG00000012017	224024	Scarf2	-0.612	0.000105498	0.00193703	0.723403	0.000110222	0.000594828
ENSMUSG00000051439	12475	Cd14	-0.683253	0.000106481	0.00195269	1.11758	3.39167e-06	2.62493e-05
ENSMUSG00000035829	241289	Ppp1r26	0.694994	0.000107303	0.00196532	#N/A	#N/A	#N/A
ENSMUSG00000024193	21652	Phf1	0.573639	0.000109513	0.00200333	#N/A	#N/A	#N/A
ENSMUSG00000004187	16581	Kifc2	0.655588	0.000110119	0.00201142	-0.82051	8.77956e-05	0.000484733
ENSMUSG00000073858	319622	Itpripl2	-0.405968	0.000110226	0.00201142	0.617263	4.23537e-10	7.02013e-09
ENSMUSG00000029328	50926	Hnrpdl	-0.500503	0.000110958	0.0020223	#N/A	#N/A	#N/A
ENSMUSG00000031613	15446	Hpgd	-0.770596	0.000111152	0.00202334	#N/A	#N/A	#N/A
ENSMUSG00000079188	665574	Gm7694	0.664347	0.000114455	0.00207839	#N/A	#N/A	#N/A
ENSMUSG00000018126	207495	Baiap2l2	0.980705	0.000115915	0.00210233	-2.08288	4.77676e-06	3.55244e-05
ENSMUSG00000054641	70945	Mmrn1	-0.853831	0.000116095	0.00210303	#N/A	#N/A	#N/A
ENSMUSG00000036975	66343	Tmem177	0.48587	0.000118636	0.00214644	#N/A	#N/A	#N/A
ENSMUSG00000011263	74463	Exoc3l2	-0.82721	0.000118997	0.00215034	#N/A	#N/A	#N/A
ENSMUSG00000027288	20402	Zfp106	0.362689	0.000119252	0.00215233	-1.0811	1.214e-10	2.1966e-09
ENSMUSG00000026090	72097	2010300C02Rik	0.780263	0.000119599	0.00215598	-0.624515	0.00741564	0.0235027
ENSMUSG00000030082	53421	Sec61a1	-0.491319	0.000119927	0.00215927	0.647381	1.23732e-09	1.88655e-08
ENSMUSG00000020794	67128	Ube2g1	-0.597815	0.000120093	0.00215964	#N/A	#N/A	#N/A
ENSMUSG00000023036	93703	Pcdhga9	0.644347	0.000120562	0.00216284	-0.768724	6.22492e-06	4.52087e-05
ENSMUSG00000024769	240505	Cdc42bpg	0.494921	0.000120464	0.00216284	#N/A	#N/A	#N/A
ENSMUSG00000004460	67838	Dnajb11	-0.401521	0.000121266	0.00217285	#N/A	#N/A	#N/A
ENSMUSG00000037601	18102	Nme1	-0.652387	0.000121938	0.00218225	1.13895	1.70013e-14	5.43628e-13
ENSMUSG00000075033	385658	Fam55c	0.630926	0.000125374	0.00223732	#N/A	#N/A	#N/A
ENSMUSG00000034449	192970	Dhrs11	0.497261	0.000125467	0.00223732	-1.09443	3.10162e-13	8.20657e-12
ENSMUSG00000070509	244058	Rgma	0.624916	0.00012536	0.00223732	#N/A	#N/A	#N/A
ENSMUSG00000068551	68910	Zfp467	0.537934	0.000125803	0.00224061	#N/A	#N/A	#N/A
ENSMUSG00000039154	20420	Shd	0.787994	0.0001261	0.00224322	-1.16092	1.23983e-05	8.427e-05
ENSMUSG00000063406	73130	Tmed5	-0.76485	0.000127152	0.00225923	#N/A	#N/A	#N/A
ENSMUSG00000037196	69310	Pacrg	0.86949	0.000127535	0.00226332	#N/A	#N/A	#N/A
ENSMUSG00000024533	68166	Spire1	-0.633328	0.000128327	0.00227467	0.589218	0.00130532	0.00524149
ENSMUSG00000037686	104816	Aspg	0.984741	0.00012864	0.0022775	#N/A	#N/A	#N/A
ENSMUSG00000039741	268515	Bahcc1	0.7434	0.000129226	0.00228243	#N/A	#N/A	#N/A
ENSMUSG00000031273	94216	Col4a6	-0.417815	0.000129133	0.00228243	0.756096	1.52034e-07	1.56248e-06
ENSMUSG00000022754	56277	Tmem45a	-0.738088	0.00012939	0.00228261	1.64754	2.26548e-14	7.15712e-13
ENSMUSG00000034158	320184	Lrrc58	-0.607291	0.00013046	0.00229603	#N/A	#N/A	#N/A
ENSMUSG00000071656	68852	Lrrn4cl	-0.649971	0.000130442	0.00229603	#N/A	#N/A	#N/A
ENSMUSG00000027820	17380	Mme	-0.546355	0.000132325	0.0023261	-1.75319	7.22225e-08	7.90046e-07
ENSMUSG00000024993	67894	Fam45a	-0.571928	0.000133915	0.00235128	#N/A	#N/A	#N/A
ENSMUSG00000021388	66695	Aspn	-0.587138	0.000134798	0.00236398	1.62203	2.67783e-14	8.26449e-13
ENSMUSG00000054477	140492	Kcnn2	0.745943	0.000135439	0.00237242	#N/A	#N/A	#N/A
ENSMUSG00000050064	242109	Zfp697	-0.692234	0.000136538	0.00238886	#N/A	#N/A	#N/A
ENSMUSG00000018841	19364	Rad51l3	0.51589	0.000136831	0.00239117	#N/A	#N/A	#N/A
ENSMUSG00000004044	19285	Ptrf	-0.413932	0.000139364	0.00243045	#N/A	#N/A	#N/A
ENSMUSG00000031442	17207	Mcf2l	-0.654626	0.000139406	0.00243045	-0.673891	6.6192e-06	4.77647e-05
ENSMUSG00000021508	57266	Cxcl14	-0.647567	0.000140861	0.00245293	-2.48992	2.00593e-12	4.75047e-11
ENSMUSG00000048004	217951	Tmem196	0.973394	0.000142028	0.00247035	#N/A	#N/A	#N/A
ENSMUSG00000022758	18440	P2rx6	0.697933	0.000142476	0.00247525	#N/A	#N/A	#N/A
ENSMUSG00000027611	19124	Procr	-0.738438	0.000143792	0.0024952	1.07886	1.95979e-07	1.95311e-06
ENSMUSG00000028843	73723	Sh3bgrl3	-0.624722	0.000145002	0.00251325	0.915743	7.9973e-08	8.67619e-07
ENSMUSG00000036617	208618	Etl4	0.620636	0.000145685	0.00252215	-0.823495	4.00391e-05	0.00024431
ENSMUSG00000035545	232798	Leng8	0.39918	0.000146335	0.00253045	#N/A	#N/A	#N/A
ENSMUSG00000007815	11848	Rhoa	-0.373059	0.000146939	0.00253499	#N/A	#N/A	#N/A
ENSMUSG00000048583	16002	Igf2	-0.690326	0.000146862	0.00253499	#N/A	#N/A	#N/A
ENSMUSG00000032554	22041	Trf	-0.434829	0.00014833	0.00255011	#N/A	#N/A	#N/A
ENSMUSG00000020092	27355	X99384	-0.627172	0.000148179	0.00255011	#N/A	#N/A	#N/A
ENSMUSG00000037795	333789	N4bp2	0.481706	0.000149811	0.00257259	-0.762556	3.63137e-06	2.78858e-05
ENSMUSG00000021171	52635	Esyt2	-0.511559	0.000150344	0.00257876	#N/A	#N/A	#N/A
ENSMUSG00000004347	18575	Pde1c	0.515889	0.000151862	0.0026018	-0.659958	8.39495e-08	9.06402e-07
ENSMUSG00000057411	214917	Fam173a	0.586473	0.000152456	0.00260897	#N/A	#N/A	#N/A
ENSMUSG00000025809	16412	Itgb1	-0.416371	0.000152911	0.00261374	#N/A	#N/A	#N/A
ENSMUSG00000037660	238057	Gdf7	0.648587	0.000156619	0.00267404	-2.0679	4.4696e-14	1.33715e-12
ENSMUSG00000033377	114301	Palmd	-0.465433	0.000156936	0.00267639	-0.754366	1.76112e-10	3.11171e-09
ENSMUSG00000042423	14123	Fbrs	0.541579	0.000159982	0.00272519	#N/A	#N/A	#N/A
ENSMUSG00000021313	20191	Ryr2	0.555845	0.000163529	0.00277924	-2.13209	9.77254e-46	4.67779e-43
ENSMUSG00000002205	101568	Vrk3	0.467376	0.000164489	0.002786	#N/A	#N/A	#N/A
ENSMUSG00000036943	235442	Rab8b	-0.464368	0.000164325	0.002786	#N/A	#N/A	#N/A
ENSMUSG00000027254	17754	Mtap1a	0.573227	0.000164314	0.002786	1.23441	6.97127e-18	3.77117e-16
ENSMUSG00000060548	29820	Tnfrsf19	0.640353	0.000165925	0.00280711	-1.35256	1.8573e-10	3.26703e-09
ENSMUSG00000024109	18189	Nrxn1	-0.917825	0.000166664	0.00281641	-1.14407	0.00545481	0.0180638
ENSMUSG00000054675	231633	Tmem119	-0.769502	0.000167636	0.00282702	0.98937	1.54081e-09	2.30917e-08
ENSMUSG00000021474	14057	Sfxn1	-0.504216	0.000167672	0.00282702	#N/A	#N/A	#N/A
ENSMUSG00000060962	73712	Dmkn	0.961837	0.000168825	0.00284001	#N/A	#N/A	#N/A
ENSMUSG00000022701	212153	2610015P09Rik	0.723796	0.000169263	0.00284415	-1.04587	5.56646e-06	4.08018e-05
ENSMUSG00000028382	230257	Rod1	-0.559346	0.000174094	0.00292203	#N/A	#N/A	#N/A
ENSMUSG00000024827	104174	Gldc	-0.857211	0.000174668	0.00292834	#N/A	#N/A	#N/A
ENSMUSG00000029333	320292	Rasgef1b	-0.787051	0.000176356	0.00295332	#N/A	#N/A	#N/A
ENSMUSG00000060843	216033	Ctnna3	0.506448	0.000176562	0.00295343	-1.10277	1.74088e-12	4.15391e-11
ENSMUSG00000027706	69276	Sec62	-0.4632	0.000177149	0.00295993	#N/A	#N/A	#N/A
ENSMUSG00000040774	99712	Cept1	-0.532811	0.00017792	0.00296131	#N/A	#N/A	#N/A
ENSMUSG00000045680	21412	Tcf21	-0.593034	0.00017803	0.00296131	1.2769	1.15268e-16	5.14345e-15
ENSMUSG00000005087	12505	Cd44	-0.522904	0.000177997	0.00296131	1.55315	1.13308e-14	3.75225e-13
ENSMUSG00000021756	16195	Il6st	-0.355014	0.000177535	0.00296131	#N/A	#N/A	#N/A
ENSMUSG00000052336	13051	Cx3cr1	-0.949156	0.000179038	0.00297475	2.06535	1.39538e-14	4.53528e-13
ENSMUSG00000032806	214601	Slc10a3	-0.574776	0.000179987	0.00298718	#N/A	#N/A	#N/A
ENSMUSG00000038991	105245	Txndc5	-0.423937	0.000181513	0.00300914	1.14257	1.20919e-21	1.00002e-19
ENSMUSG00000063681	170788	Crb1	1.06505	0.000185046	0.0030643	#N/A	#N/A	#N/A
ENSMUSG00000067194	66235	Eif1ax	-0.442039	0.000185649	0.00307085	#N/A	#N/A	#N/A
ENSMUSG00000023000	13363	Dhh	-1.01457	0.000186158	0.00307585	#N/A	#N/A	#N/A
ENSMUSG00000061322	68922	Dnaic1	-0.875126	0.000186592	0.00307621	#N/A	#N/A	#N/A
ENSMUSG00000022797	22042	Tfrc	-0.972704	0.000186594	0.00307621	#N/A	#N/A	#N/A
ENSMUSG00000061607	240087	Mdc1	0.474459	0.000188797	0.00310908	#N/A	#N/A	#N/A
ENSMUSG00000049929	78134	Lpar4	-0.971574	0.000190324	0.00313075	#N/A	#N/A	#N/A
ENSMUSG00000028249	53378	Sdcbp	-0.425331	0.00019077	0.00313116	#N/A	#N/A	#N/A
ENSMUSG00000006494	228026	Pdk1	0.328211	0.000190658	0.00313116	-0.585589	2.02811e-07	2.01738e-06
ENSMUSG00000055322	21961	Tns1	0.589113	0.000191823	0.00314496	#N/A	#N/A	#N/A
ENSMUSG00000063810	236266	Alms1	0.53604	0.000192134	0.00314659	-0.915533	4.29053e-10	7.08925e-09
ENSMUSG00000031767	67528	Nudt7	0.535908	0.000194559	0.0031828	#N/A	#N/A	#N/A
ENSMUSG00000009614	192166	Sardh	-0.650042	0.000195699	0.00319792	1.59914	2.0839e-17	1.05167e-15
ENSMUSG00000031517	234267	Gpm6a	-0.657655	0.000196913	0.00321422	#N/A	#N/A	#N/A
ENSMUSG00000051184	66056	Zfp524	0.677443	0.000197463	0.00321434	#N/A	#N/A	#N/A
ENSMUSG00000026791	56017	Slc2a8	0.5085	0.00019716	0.00321434	#N/A	#N/A	#N/A
ENSMUSG00000021728	13723	Emb	-0.778624	0.000197569	0.00321434	0.931654	0.000223858	0.0011247
ENSMUSG00000025723	68039	Nmb	-0.999493	0.000198182	0.00322079	-0.89968	0.00827547	0.0257778
ENSMUSG00000017493	16010	Igfbp4	-0.437098	0.000200217	0.0032503	#N/A	#N/A	#N/A
ENSMUSG00000036792	109241	Mbd5	0.422868	0.000200516	0.00325159	#N/A	#N/A	#N/A
ENSMUSG00000054619	70152	Mettl7a1	0.413245	0.000202294	0.00327686	#N/A	#N/A	#N/A
ENSMUSG00000047888	213988	Tnrc6b	0.49294	0.000205046	0.00331421	#N/A	#N/A	#N/A
ENSMUSG00000028277	56228	Ube2j1	-0.496421	0.000206229	0.0033297	#N/A	#N/A	#N/A
ENSMUSG00000039787	99151	Cercam	-0.68244	0.000212408	0.00342575	1.16709	9.80669e-06	6.79415e-05
ENSMUSG00000075415	14269	Fnbp1	0.507324	0.000212926	0.00343037	#N/A	#N/A	#N/A
ENSMUSG00000026600	20652	Soat1	-0.508575	0.000213345	0.0034334	0.923734	1.16334e-10	2.1195e-09
ENSMUSG00000041798	103988	Gck	0.957758	0.0002144	0.00344664	-1.44949	5.08684e-05	0.000302159
ENSMUSG00000042305	57439	Tmem183a	-0.429706	0.000219862	0.00352862	0.603733	6.241e-09	8.34034e-08
ENSMUSG00000002997	19088	Prkar2b	-0.784967	0.000223858	0.00358704	#N/A	#N/A	#N/A
ENSMUSG00000069171	13865	Nr2f1	0.53755	0.000227682	0.00362874	#N/A	#N/A	#N/A
ENSMUSG00000007613	21812	Tgfbr1	-0.506286	0.000226952	0.00362874	#N/A	#N/A	#N/A
ENSMUSG00000020546	20913	Stxbp4	0.519448	0.00022755	0.00362874	-0.905399	1.06852e-07	1.12672e-06
ENSMUSG00000032648	19309	Pygm	0.399004	0.000227655	0.00362874	#N/A	#N/A	#N/A
ENSMUSG00000025241	17281	Fyco1	0.526459	0.000229231	0.00364952	-0.844728	2.87527e-07	2.7915e-06
ENSMUSG00000025059	14933	Gyk	-0.470333	0.000229723	0.00365344	#N/A	#N/A	#N/A
ENSMUSG00000004771	53869	Rab11a	-0.473832	0.00023237	0.00369158	#N/A	#N/A	#N/A
ENSMUSG00000056851	18521	Pcbp2	0.528869	0.000233817	0.00370663	#N/A	#N/A	#N/A
ENSMUSG00000063529	380842	Gm1574	0.812848	0.000233816	0.00370663	-1.30684	7.50504e-05	0.000424149
ENSMUSG00000030539	20352	Sema4b	0.445137	0.000236245	0.00374114	#N/A	#N/A	#N/A
ENSMUSG00000033585	17984	Ndn	-0.528041	0.000238059	0.00376584	#N/A	#N/A	#N/A
ENSMUSG00000029862	12723	Clcn1	0.491335	0.000239635	0.00378675	-2.47246	1.38295e-25	1.69342e-23
ENSMUSG00000030148	26888	Clec4a2	-0.93151	0.000240187	0.00379143	1.23762	0.000101844	0.000552742
ENSMUSG00000022095	239170	Fam160b2	0.609424	0.000244413	0.00385405	#N/A	#N/A	#N/A
ENSMUSG00000020486	18952	38231	0.458741	0.000245637	0.00386924	#N/A	#N/A	#N/A
ENSMUSG00000026399	13136	Cd55	-0.52492	0.000247688	0.00389742	#N/A	#N/A	#N/A
ENSMUSG00000043008	239743	Klhl6	-0.617764	0.000250486	0.00393727	0.839715	2.53683e-09	3.67631e-08
ENSMUSG00000027489	56846	Necab3	0.974378	0.000252551	0.00396553	#N/A	#N/A	#N/A
ENSMUSG00000032558	74025	Nphp3	0.408651	0.000254091	0.00398549	-0.656704	0.000175733	0.000903685
ENSMUSG00000059439	192197	Bcas3	0.389101	0.000254831	0.00399289	#N/A	#N/A	#N/A
ENSMUSG00000025597	237010	Klhl4	-0.564251	0.00025575	0.00400306	#N/A	#N/A	#N/A
ENSMUSG00000051483	12408	Cbr1	0.445858	0.000256661	0.0040131	#N/A	#N/A	#N/A
ENSMUSG00000039891	378431	Txlnb	0.422562	0.000257468	0.00401942	-1.5806	1.31723e-26	1.85776e-24
ENSMUSG00000038256	77578	Bcl9	0.599581	0.000257607	0.00401942	#N/A	#N/A	#N/A
ENSMUSG00000040711	268396	Sh3pxd2b	-0.588835	0.000260117	0.00405433	0.829327	1.82662e-06	1.49422e-05
ENSMUSG00000037119	210998	D15Ertd621e	-0.524627	0.000260508	0.00405617	#N/A	#N/A	#N/A
ENSMUSG00000056476	329650	Med12l	0.558036	0.000261024	0.00405995	#N/A	#N/A	#N/A
ENSMUSG00000038387	20130	Rras	-0.572737	0.000261903	0.00406834	0.728084	3.04914e-09	4.34695e-08
ENSMUSG00000028960	63958	Ube4b	0.408004	0.000262111	0.00406834	#N/A	#N/A	#N/A
ENSMUSG00000030269	97287	Mtmr14	0.445392	0.000265185	0.00411175	#N/A	#N/A	#N/A
ENSMUSG00000027861	12373	Casq2	-0.507044	0.000265796	0.00411693	#N/A	#N/A	#N/A
ENSMUSG00000012405	66480	Rpl15	-0.50166	0.000266241	0.00411952	0.615124	1.51732e-05	0.000101648
ENSMUSG00000021112	56217	Mpp5	-0.486072	0.000266681	0.00412204	-0.663488	0.000120865	0.00064691
ENSMUSG00000036752	227613	Tubb4b	-0.563859	0.000267572	0.00413152	#N/A	#N/A	#N/A
ENSMUSG00000075602	110454	Ly6a	-0.441772	0.000268814	0.00414637	0.697148	0.000460725	0.00213295
ENSMUSG00000030352	109246	Tspan9	-0.470785	0.000271858	0.00418898	0.865524	5.01492e-13	1.29437e-11
ENSMUSG00000033107	67664	Rnf125	-0.821796	0.000274425	0.00422416	#N/A	#N/A	#N/A
ENSMUSG00000025782	209361	Taf3	0.498376	0.000274847	0.0042247	#N/A	#N/A	#N/A
ENSMUSG00000045136	73710	Tubb2b	-0.947726	0.000275029	0.0042247	0.957528	0.000580921	0.00261059
ENSMUSG00000020841	12874	Cpd	-0.381113	0.00027616	0.00423769	#N/A	#N/A	#N/A
ENSMUSG00000052712	80748	BC004004	0.364662	0.000277734	0.00424868	-0.687695	1.07881e-08	1.38206e-07
ENSMUSG00000021458	72061	2010111I01Rik	-0.456715	0.000277643	0.00424868	#N/A	#N/A	#N/A
ENSMUSG00000021130	108760	Galntl1	-0.745712	0.00027766	0.00424868	1.63895	3.30284e-17	1.61522e-15
ENSMUSG00000025804	12768	Ccr1	-0.912488	0.000279588	0.00427263	2.4462	7.9879e-20	5.34648e-18
ENSMUSG00000038201	16495	Kcna7	0.590001	0.000280915	0.00428653	-0.778494	1.15649e-05	7.90835e-05
ENSMUSG00000047867	231931	Gimap6	-0.588021	0.000281074	0.00428653	#N/A	#N/A	#N/A
ENSMUSG00000033458	330554	Fan1	0.528424	0.000285363	0.00434301	#N/A	#N/A	#N/A
ENSMUSG00000022220	104110	Adcy4	-0.58666	0.000285818	0.00434549	#N/A	#N/A	#N/A
ENSMUSG00000026603	226830	Smyd2	-0.647295	0.000286232	0.00434733	0.687665	7.29308e-06	5.2151e-05
ENSMUSG00000059173	18573	Pde1a	-0.549711	0.000286736	0.00435054	#N/A	#N/A	#N/A
ENSMUSG00000033720	94282	Sfxn5	0.627599	0.000287326	0.00435503	#N/A	#N/A	#N/A
ENSMUSG00000054206	16904	Gzmm	0.763602	0.000289957	0.00439044	#N/A	#N/A	#N/A
ENSMUSG00000040543	327958	Pitpnm3	0.73162	0.00029095	0.00440099	-0.827029	0.00206761	0.00783212
ENSMUSG00000035486	216166	Plk5	0.95809	0.000292346	0.00441761	-1.11387	0.016851	0.0465999
ENSMUSG00000038022	330323	Fam188b	0.502187	0.000295526	0.00446112	#N/A	#N/A	#N/A
ENSMUSG00000024095	72692	Hnrpll	-0.456395	0.000296809	0.00447594	#N/A	#N/A	#N/A
ENSMUSG00000034910	72135	Pygo1	0.499477	0.000297205	0.00447737	-0.794482	3.94903e-05	0.000241498
ENSMUSG00000036026	224807	Tmem63b	0.418774	0.00029893	0.0044988	#N/A	#N/A	#N/A
ENSMUSG00000079055	110893	Slc8a3	0.814443	0.000299286	0.00449959	#N/A	#N/A	#N/A
ENSMUSG00000028480	384009	Glipr2	-0.655519	0.000300711	0.00451644	1.16042	1.63477e-08	2.0349e-07
ENSMUSG00000028838	56219	Extl1	0.440198	0.000301253	0.00452002	-0.773995	0.000152964	0.00079981
ENSMUSG00000029624	71799	Ptcd1	0.446233	0.000303521	0.00454944	#N/A	#N/A	#N/A
ENSMUSG00000018001	19159	Cyth3	-0.433011	0.000305552	0.00457527	0.587594	0.000104156	0.000564602
ENSMUSG00000022793	56375	B4galt4	-0.499671	0.00030685	0.00459008	#N/A	#N/A	#N/A
ENSMUSG00000024353	69816	2010001M09Rik	0.891983	0.00030948	0.00462191	-1.60241	4.90602e-05	0.000292436
ENSMUSG00000006740	16573	Kif5b	-0.39483	0.000311387	0.00464392	#N/A	#N/A	#N/A
ENSMUSG00000039782	231207	Cpeb2	0.57327	0.000311998	0.0046452	#N/A	#N/A	#N/A
ENSMUSG00000023036	93707	Pcdhga9	0.795313	0.000312098	0.0046452	-0.768724	6.22492e-06	4.52087e-05
ENSMUSG00000040694	11811	Apobec2	0.392103	0.000312787	0.00465078	#N/A	#N/A	#N/A
ENSMUSG00000038204	117590	Asb10	0.412136	0.000315263	0.00468292	-1.20448	1.83796e-09	2.70825e-08
ENSMUSG00000025175	63828	Fn3k	0.514103	0.000318032	0.00471933	-1.00735	3.22318e-08	3.76022e-07
ENSMUSG00000038212	66631	Hiatl1	-0.496223	0.000320178	0.00474643	#N/A	#N/A	#N/A
ENSMUSG00000021236	12499	Entpd5	0.426958	0.000323165	0.00478594	-0.951404	3.96955e-18	2.21565e-16
ENSMUSG00000015852	80891	Fcrls	-0.564288	0.000326247	0.00482676	1.37972	3.16123e-12	7.23692e-11
ENSMUSG00000009394	20965	Syn2	-0.428024	0.000328917	0.00485766	#N/A	#N/A	#N/A
ENSMUSG00000020668	16570	Kif3c	0.492819	0.000328989	0.00485766	#N/A	#N/A	#N/A
ENSMUSG00000020122	13649	Egfr	-0.490339	0.000331321	0.00488238	#N/A	#N/A	#N/A
ENSMUSG00000030880	26939	Polr3e	-0.470814	0.000339353	0.00499579	#N/A	#N/A	#N/A
ENSMUSG00000030739	71960	Myh14	0.512073	0.000339907	0.00499899	#N/A	#N/A	#N/A
ENSMUSG00000024074	50766	Crim1	-0.49574	0.000340632	0.00500469	0.653196	1.59241e-05	0.000106179
ENSMUSG00000020358	15384	Hnrnpab	-0.377288	0.000341836	0.00501742	#N/A	#N/A	#N/A
ENSMUSG00000027429	27054	Sec23b	-0.453388	0.00034323	0.00503292	0.65919	2.43308e-06	1.93812e-05
ENSMUSG00000022200	66629	Golph3	-0.4051	0.000344517	0.0050468	#N/A	#N/A	#N/A
ENSMUSG00000036334	242050	Igsf10	-0.525242	0.000346051	0.00506428	#N/A	#N/A	#N/A
ENSMUSG00000041355	66256	Ssr2	-0.409139	0.000347652	0.0050827	0.734529	8.10937e-11	1.49914e-09
ENSMUSG00000023912	74011	Slc25a27	0.733549	0.00034989	0.00511039	-1.05667	1.36424e-06	1.1487e-05
ENSMUSG00000051344	241075	Plekhm3	0.438551	0.000352624	0.00514526	-0.632151	6.76993e-09	8.98637e-08
ENSMUSG00000005973	19672	Rcn1	-0.38651	0.000355847	0.00518719	#N/A	#N/A	#N/A
ENSMUSG00000004530	23790	Coro1c	-0.502294	0.00035907	0.00522806	0.633031	7.08745e-06	5.08025e-05
ENSMUSG00000048776	19227	Pthlh	-0.82489	0.000359355	0.00522806	#N/A	#N/A	#N/A
ENSMUSG00000025350	19682	Rdh5	0.739444	0.000368199	0.00535149	#N/A	#N/A	#N/A
ENSMUSG00000022032	71145	Scara5	-0.551642	0.000372897	0.0054093	-1.16056	3.11209e-07	2.99748e-06
ENSMUSG00000062991	211323	Nrg1	-0.911164	0.000372904	0.0054093	3.03828	1.14128e-37	3.53483e-35
ENSMUSG00000027784	242083	Ppm1l	0.39842	0.000373668	0.00541508	#N/A	#N/A	#N/A
ENSMUSG00000040212	13732	Emp3	-0.556955	0.000374352	0.00541971	1.0381	8.51045e-08	9.16992e-07
ENSMUSG00000021282	217869	Eif5	-0.508391	0.000376307	0.00544271	#N/A	#N/A	#N/A
ENSMUSG00000031703	71927	Itfg1	-0.440225	0.000378786	0.00547323	#N/A	#N/A	#N/A
ENSMUSG00000031841	12554	Cdh13	0.367613	0.000380224	0.00548868	#N/A	#N/A	#N/A
ENSMUSG00000025025	17859	Mxi1	0.36781	0.000384101	0.00553926	#N/A	#N/A	#N/A
ENSMUSG00000008206	67260	Lass4	0.397104	0.000385261	0.0055506	#N/A	#N/A	#N/A
ENSMUSG00000047996	546336	Prrg1	-0.645711	0.000387259	0.00557398	#N/A	#N/A	#N/A
ENSMUSG00000026069	17082	Il1rl1	-0.924652	0.000390124	0.00560979	#N/A	#N/A	#N/A
ENSMUSG00000032115	12282	Hyou1	-0.459693	0.000390667	0.00561216	#N/A	#N/A	#N/A
ENSMUSG00000036764	30045	Dnajc12	0.600388	0.000396384	0.00568878	#N/A	#N/A	#N/A
ENSMUSG00000066150	20529	Slc31a1	-0.502337	0.000397303	0.00569647	#N/A	#N/A	#N/A
ENSMUSG00000035849	268481	Krt222	-0.514783	0.000401691	0.00575382	#N/A	#N/A	#N/A
ENSMUSG00000028116	59006	Myoz2	-0.466452	0.00040252	0.00576014	#N/A	#N/A	#N/A
ENSMUSG00000032245	76524	Cln6	0.474961	0.000404549	0.00578361	#N/A	#N/A	#N/A
ENSMUSG00000041889	77552	Shisa4	-0.765495	0.000405375	0.00578985	1.3471	9.60534e-15	3.24895e-13
ENSMUSG00000007097	98660	Atp1a2	0.425086	0.000407444	0.0058138	#N/A	#N/A	#N/A
ENSMUSG00000020747	71947	2310067B10Rik	0.409153	0.000414818	0.00591334	#N/A	#N/A	#N/A
ENSMUSG00000025608	27205	Podxl	-0.617633	0.000416187	0.00592718	#N/A	#N/A	#N/A
ENSMUSG00000026797	20910	Stxbp1	0.452871	0.000417877	0.00594554	#N/A	#N/A	#N/A
ENSMUSG00000018263	21388	Tbx5	0.358398	0.000420707	0.00598007	1.03203	9.62798e-14	2.74519e-12
ENSMUSG00000039395	381269	Mreg	0.408051	0.000421354	0.00598064	-0.759604	4.52797e-06	3.39136e-05
ENSMUSG00000039683	330222	Sdk1	-0.713506	0.000421551	0.00598064	1.06362	6.64074e-08	7.32011e-07
ENSMUSG00000004263	13498	Atn1	0.69943	0.000424361	0.00601475	#N/A	#N/A	#N/A
ENSMUSG00000029683	93677	Lmod2	-0.549952	0.000427103	0.00604785	#N/A	#N/A	#N/A
ENSMUSG00000073968	101700	Trim68	0.450478	0.000427689	0.00605038	#N/A	#N/A	#N/A
ENSMUSG00000046345	69576	2310010M20Rik	0.591133	0.000428116	0.00605065	-1.48963	4.64818e-09	6.35694e-08
ENSMUSG00000040734	333654	Ppp1r13l	0.608229	0.000429695	0.0060629	-0.977955	0.00155021	0.00608679
ENSMUSG00000025278	286940	Flnb	-0.489148	0.000429799	0.0060629	#N/A	#N/A	#N/A
ENSMUSG00000067158	12829	Col4a4	-0.483346	0.000431216	0.00607711	#N/A	#N/A	#N/A
ENSMUSG00000040747	12508	Cd53	-0.690552	0.000435586	0.00612708	1.28567	1.43282e-10	2.55738e-09
ENSMUSG00000038058	107607	Nod1	0.368875	0.000441242	0.00620077	#N/A	#N/A	#N/A
ENSMUSG00000050345	214639	4930486L24Rik	-0.805434	0.00044174	0.0062019	#N/A	#N/A	#N/A
ENSMUSG00000031209	15203	Heph	-0.588554	0.000442925	0.00621266	#N/A	#N/A	#N/A
ENSMUSG00000005465	50931	Il27ra	-0.663986	0.000446126	0.00625166	#N/A	#N/A	#N/A
ENSMUSG00000029093	81840	Sorcs2	0.61624	0.000448089	0.00626758	#N/A	#N/A	#N/A
ENSMUSG00000030754	70349	Copb1	-0.44831	0.000448106	0.00626758	#N/A	#N/A	#N/A
ENSMUSG00000033863	16601	Klf9	-0.64943	0.00045314	0.00633202	#N/A	#N/A	#N/A
ENSMUSG00000040537	11496	Adam22	0.540449	0.000453732	0.00633433	#N/A	#N/A	#N/A
ENSMUSG00000033184	66676	Tmed7	-0.480501	0.000456874	0.00637221	#N/A	#N/A	#N/A
ENSMUSG00000029162	16548	Khk	0.588838	0.000459123	0.00639757	#N/A	#N/A	#N/A
ENSMUSG00000041180	226098	Hectd2	-0.67725	0.000460893	0.00641021	#N/A	#N/A	#N/A
ENSMUSG00000022280	30945	Rnf19a	-0.477621	0.000462326	0.00642412	#N/A	#N/A	#N/A
ENSMUSG00000043131	232157	Mob1a	-0.476162	0.000466408	0.00647478	#N/A	#N/A	#N/A
ENSMUSG00000020844	18230	Nxn	-0.475325	0.000471373	0.00653761	#N/A	#N/A	#N/A
ENSMUSG00000004462	70573	Tbccd1	0.463897	0.000475005	0.00657569	#N/A	#N/A	#N/A
ENSMUSG00000024168	407831	Tmem204	-0.54431	0.000474856	0.00657569	#N/A	#N/A	#N/A
ENSMUSG00000013236	19280	Ptprs	0.435394	0.000479728	0.0066349	0.605583	0.000235058	0.00117388
ENSMUSG00000060862	230848	Zbtb40	0.525382	0.000483548	0.00668151	#N/A	#N/A	#N/A
ENSMUSG00000026159	15463	Agfg1	-0.455514	0.000484901	0.00668776	#N/A	#N/A	#N/A
ENSMUSG00000031111	209268	Igsf1	-0.509091	0.000484846	0.00668776	#N/A	#N/A	#N/A
ENSMUSG00000024659	16952	Anxa1	-0.569354	0.00048953	0.00674534	1.01938	1.41585e-07	1.4608e-06
ENSMUSG00000032501	211770	Trib1	-0.783693	0.000490176	0.00674799	1.20746	1.22503e-07	1.2781e-06
ENSMUSG00000074748	382423	Atxn7l3b	-0.40231	0.000491802	0.0067641	#N/A	#N/A	#N/A
ENSMUSG00000020949	30795	Fkbp3	-0.435329	0.000492812	0.00676752	#N/A	#N/A	#N/A
ENSMUSG00000048787	233805	Dcun1d3	-0.496043	0.000493417	0.00676752	#N/A	#N/A	#N/A
ENSMUSG00000022440	72709	C1qtnf6	-0.630632	0.000498256	0.00682757	2.25027	2.64286e-15	9.55377e-14
ENSMUSG00000022548	11815	Apod	0.743077	0.000500914	0.00685768	#N/A	#N/A	#N/A
ENSMUSG00000027253	228357	Lrp4	0.412049	0.000507094	0.00693432	#N/A	#N/A	#N/A
ENSMUSG00000029207	11787	Apbb2	0.346803	0.000507446	0.00693432	#N/A	#N/A	#N/A
ENSMUSG00000026854	74270	Usp20	0.44396	0.000509143	0.0069397	#N/A	#N/A	#N/A
ENSMUSG00000039156	116873	Stim2	-0.434236	0.000508801	0.0069397	#N/A	#N/A	#N/A
ENSMUSG00000038801	338417	Scgb1c1	-0.887922	0.000509241	0.0069397	1.2698	6.91133e-05	0.000394976
ENSMUSG00000023092	14199	Fhl1	-0.467827	0.000509872	0.00694192	1.73217	1.90262e-24	2.07267e-22
ENSMUSG00000041115	245666	Iqsec2	0.637387	0.000511787	0.00696161	#N/A	#N/A	#N/A
ENSMUSG00000034936	80981	Arl4d	-0.611133	0.00051331	0.00697595	#N/A	#N/A	#N/A
ENSMUSG00000058488	16591	Kl	-0.935293	0.00051561	0.00700079	-1.10374	0.0129058	0.0374193
ENSMUSG00000024006	106504	Stk38	-0.390122	0.000518935	0.00703629	#N/A	#N/A	#N/A
ENSMUSG00000049092	70713	Gpr137c	0.609841	0.000519645	0.00703629	-0.718822	0.00251414	0.00929185
ENSMUSG00000042567	674895	Nek10	-0.971451	0.000519535	0.00703629	#N/A	#N/A	#N/A
ENSMUSG00000046714	14234	Foxc2	-0.793819	0.000521311	0.00705242	0.665873	0.00642458	0.020817
ENSMUSG00000040896	56543	Kcnd3	0.520545	0.00052304	0.00706297	#N/A	#N/A	#N/A
ENSMUSG00000050192	208691	Eif5a2	-0.636594	0.000523042	0.00706297	#N/A	#N/A	#N/A
ENSMUSG00000090394	67647	4930523C07Rik	-0.591604	0.000531684	0.00716663	#N/A	#N/A	#N/A
ENSMUSG00000024302	13527	Dtna	-0.387529	0.000534005	0.00717838	#N/A	#N/A	#N/A
ENSMUSG00000044674	14362	Fzd1	-0.53935	0.000533119	0.00717838	0.880975	7.65895e-11	1.4233e-09
ENSMUSG00000032657	68521	Fam189b	0.744888	0.000533672	0.00717838	#N/A	#N/A	#N/A
ENSMUSG00000014164	100503085	Klhl3	0.771047	0.000535098	0.00718008	-0.703629	0.00250403	0.00925882
ENSMUSG00000022836	107589	Mylk	-0.462037	0.000535723	0.00718198	#N/A	#N/A	#N/A
ENSMUSG00000024063	77889	Lbh	-0.476161	0.000537363	0.00719747	1.72216	2.85631e-15	1.02309e-13
ENSMUSG00000046491	69183	C1qtnf2	-0.706486	0.000537923	0.00719847	0.664311	0.000912317	0.00385217
ENSMUSG00000018920	66102	Cxcl16	-0.533417	0.000541661	0.00723639	1.31602	1.22089e-30	2.29585e-28
ENSMUSG00000054752	319636	Fsd1l	-0.471704	0.000541731	0.00723639	#N/A	#N/A	#N/A
ENSMUSG00000049076	78618	Acap2	-0.422548	0.000545499	0.00726746	#N/A	#N/A	#N/A
ENSMUSG00000036473	224617	Tbc1d24	0.41854	0.000545524	0.00726746	#N/A	#N/A	#N/A
ENSMUSG00000070814	321008	6330408A02Rik	0.534589	0.000544972	0.00726746	#N/A	#N/A	#N/A
ENSMUSG00000038390	14788	Gpr162	0.646035	0.000554915	0.00737933	-0.763451	1.6453e-05	0.000109382
ENSMUSG00000037010	30878	Apln	-0.947381	0.000555989	0.007387	1.62173	1.65056e-09	2.45964e-08
ENSMUSG00000063849	66812	Ppcdc	0.557096	0.000559824	0.0074313	#N/A	#N/A	#N/A
ENSMUSG00000067586	13610	S1pr3	-0.650844	0.000564523	0.00748699	#N/A	#N/A	#N/A
ENSMUSG00000017817	59091	Jph2	-0.49281	0.000566468	0.00750608	#N/A	#N/A	#N/A
ENSMUSG00000052534	18514	Pbx1	0.49685	0.000571231	0.00756245	#N/A	#N/A	#N/A
ENSMUSG00000007041	114584	Clic1	-0.589099	0.000574055	0.00759307	0.963556	1.56502e-11	3.26135e-10
ENSMUSG00000026020	55989	Nop58	-0.46579	0.000574752	0.00759553	#N/A	#N/A	#N/A
ENSMUSG00000045114	69017	Prrt2	0.945707	0.000575648	0.0076006	#N/A	#N/A	#N/A
ENSMUSG00000051550	68490	Zfp579	0.621567	0.000576393	0.00760367	-2.78664	8.63463e-42	3.49725e-39
ENSMUSG00000029591	22256	Ung	-0.564831	0.000578135	0.0076199	#N/A	#N/A	#N/A
ENSMUSG00000019997	14219	Ctgf	-0.979261	0.000579478	0.00763082	1.1476	4.36047e-10	7.19728e-09
ENSMUSG00000041775	69546	Mapk1ip1	0.453107	0.000580468	0.00763708	-1.16717	2.81559e-14	8.63592e-13
ENSMUSG00000029816	93695	Gpnmb	0.746436	0.000589896	0.00775208	-1.0019	2.31811e-05	0.000149396
ENSMUSG00000041849	239319	Card6	0.566821	0.000590774	0.00775208	#N/A	#N/A	#N/A
ENSMUSG00000031748	14681	Gnao1	0.434469	0.000594166	0.00778971	#N/A	#N/A	#N/A
ENSMUSG00000029084	12494	Cd38	-0.553746	0.000597386	0.00782502	#N/A	#N/A	#N/A
ENSMUSG00000001300	13642	Efnb2	-0.449795	0.000600849	0.00786345	0.825604	8.25525e-06	5.83445e-05
ENSMUSG00000022205	20024	Sub1	-0.46413	0.000604387	0.00790279	#N/A	#N/A	#N/A
ENSMUSG00000028996	63954	Rbp7	-0.749107	0.000607422	0.00793548	#N/A	#N/A	#N/A
ENSMUSG00000031451	14456	Gas6	-0.405624	0.000609158	0.00795118	#N/A	#N/A	#N/A
ENSMUSG00000021186	23876	Fbln5	-0.576671	0.000616429	0.00801789	1.49063	1.59044e-20	1.14715e-18
ENSMUSG00000022353	211401	Mtss1	0.471736	0.000616139	0.00801789	-0.609669	1.16386e-05	7.95171e-05
ENSMUSG00000038773	277250	Kdm3b	0.381786	0.000615633	0.00801789	#N/A	#N/A	#N/A
ENSMUSG00000061731	14042	Ext1	-0.400565	0.000618379	0.00802919	#N/A	#N/A	#N/A
ENSMUSG00000024317	56515	Rnf138	-0.674208	0.000618071	0.00802919	#N/A	#N/A	#N/A
ENSMUSG00000007476	241296	Lrrc8a	-0.638662	0.000622051	0.00806982	#N/A	#N/A	#N/A
ENSMUSG00000070044	212326	Fam149a	-0.530701	0.000624948	0.00809794	#N/A	#N/A	#N/A
ENSMUSG00000009566	14287	Fpgs	-0.574507	0.000625854	0.00809794	#N/A	#N/A	#N/A
ENSMUSG00000028041	11490	Adam15	-0.536065	0.000625575	0.00809794	#N/A	#N/A	#N/A
ENSMUSG00000038708	54214	Golga4	0.32896	0.00062826	0.00811506	-1.70593	2.43372e-19	1.52552e-17
ENSMUSG00000073131	67048	Vma21	-0.5974	0.00062827	0.00811506	#N/A	#N/A	#N/A
ENSMUSG00000032786	11655	Alas1	-0.412404	0.000631576	0.0081436	#N/A	#N/A	#N/A
ENSMUSG00000073676	15528	Hspe1	-0.533095	0.000632927	0.00814687	#N/A	#N/A	#N/A
ENSMUSG00000038244	320878	Mical2	-0.512159	0.000632879	0.00814687	0.762281	4.76357e-07	4.38492e-06
ENSMUSG00000040877	212198	Wdr25	0.673971	0.000642574	0.00826054	#N/A	#N/A	#N/A
ENSMUSG00000035936	214579	Aldh5a1	0.418692	0.00064287	0.00826054	#N/A	#N/A	#N/A
ENSMUSG00000018379	110809	Srsf1	-0.387123	0.000644607	0.00826796	#N/A	#N/A	#N/A
ENSMUSG00000026812	64930	Tsc1	0.379251	0.00064623	0.00826796	#N/A	#N/A	#N/A
ENSMUSG00000028226	17389	Mmp16	-0.618399	0.000644043	0.00826796	#N/A	#N/A	#N/A
ENSMUSG00000024712	54391	Rfk	-0.481475	0.000645846	0.00826796	#N/A	#N/A	#N/A
ENSMUSG00000028584	242735	Lrrc38	0.74953	0.000647091	0.00827185	-2.79233	1.45425e-11	3.04194e-10
ENSMUSG00000031776	107566	Arl2bp	-0.369915	0.000648195	0.00827884	#N/A	#N/A	#N/A
ENSMUSG00000000776	67065	Polr3d	-0.446405	0.000649708	0.00828391	#N/A	#N/A	#N/A
ENSMUSG00000034591	338365	Slc41a2	-0.686534	0.000650469	0.00828651	0.723497	4.08693e-06	3.10371e-05
ENSMUSG00000032718	67729	Mansc1	0.536177	0.000652376	0.00830367	#N/A	#N/A	#N/A
ENSMUSG00000079426	68089	Arpc4	-0.410944	0.00065384	0.00831335	0.68713	1.75211e-07	1.77299e-06
ENSMUSG00000093668	75507	Pou5f2	0.922086	0.000654255	0.00831335	#N/A	#N/A	#N/A
ENSMUSG00000052565	14957	Hist1h1d	0.663128	0.000657176	0.00834333	2.20376	1.47563e-26	2.02688e-24
ENSMUSG00000040528	380732	Gm885	-0.96923	0.000659551	0.00836633	0.998098	0.00328356	0.011687
ENSMUSG00000051650	53625	B3gnt2	-0.449425	0.000664924	0.00841293	#N/A	#N/A	#N/A
ENSMUSG00000078578	66105	Ube2d3	-0.614027	0.000664439	0.00841293	#N/A	#N/A	#N/A
ENSMUSG00000057604	30937	Lmcd1	-0.738948	0.000664293	0.00841293	1.25794	1.58805e-08	1.98928e-07
ENSMUSG00000027848	99543	Olfml3	-0.474428	0.000670839	0.00848029	0.796086	6.73147e-05	0.000385534
ENSMUSG00000018736	83431	Ndel1	-0.335785	0.000671389	0.00848029	#N/A	#N/A	#N/A
ENSMUSG00000076432	22630	Ywhaq	-0.604504	0.000673683	0.00850203	#N/A	#N/A	#N/A
ENSMUSG00000048612	226101	Myof	-0.429972	0.000676477	0.00852399	0.794638	2.15496e-07	2.13282e-06
ENSMUSG00000070570	72961	Slc17a7	0.46314	0.000676571	0.00852399	-1.00893	3.33439e-09	4.71532e-08
ENSMUSG00000003378	14809	Grik5	0.570825	0.000680487	0.00856606	#N/A	#N/A	#N/A
ENSMUSG00000031467	52123	Agpat5	-0.490828	0.000681133	0.00856694	#N/A	#N/A	#N/A
ENSMUSG00000053475	21930	Tnfaip6	-0.768093	0.000682791	0.00857327	#N/A	#N/A	#N/A
ENSMUSG00000036905	12260	C1qb	-0.568082	0.000682714	0.00857327	1.31867	5.80151e-23	5.65683e-21
ENSMUSG00000026335	18484	Pam	0.297618	0.000690971	0.00866134	-1.03312	1.11615e-33	2.67132e-31
ENSMUSG00000030996	11870	Art1	0.378552	0.000693077	0.00868041	-0.834014	1.23069e-09	1.87826e-08
ENSMUSG00000069833	66395	Ahnak	-0.399126	0.000694286	0.00868823	#N/A	#N/A	#N/A
ENSMUSG00000031274	12830	Col4a5	-0.375206	0.00069531	0.00869371	0.865464	6.3687e-14	1.86642e-12
ENSMUSG00000034303	245902	Ccdc15	0.598208	0.000701202	0.00876001	-0.646741	0.00406944	0.0140443
ENSMUSG00000024091	30960	Vapa	-0.398744	0.000703238	0.00877806	#N/A	#N/A	#N/A
ENSMUSG00000028098	67845	Rnf115	-0.457349	0.000710174	0.0088572	#N/A	#N/A	#N/A
ENSMUSG00000031295	110094	Phka2	0.386943	0.000720363	0.00896921	#N/A	#N/A	#N/A
ENSMUSG00000039497	212898	Dse	-0.417545	0.000719973	0.00896921	0.843864	6.33286e-12	1.38168e-10
ENSMUSG00000030064	232288	Frmd4b	-0.409158	0.000726259	0.00903505	#N/A	#N/A	#N/A
ENSMUSG00000062127	80281	Cttnbp2nl	-0.572041	0.000731989	0.00908351	#N/A	#N/A	#N/A
ENSMUSG00000028982	70556	Slc25a33	-0.546617	0.000731896	0.00908351	#N/A	#N/A	#N/A
ENSMUSG00000058927	13063	Gm10053	-0.696465	0.000731971	0.00908351	#N/A	#N/A	#N/A
ENSMUSG00000063694	13063	Cycs	-0.696465	0.000731971	0.00908351	#N/A	#N/A	#N/A
ENSMUSG00000027082	21788	Tfpi	-0.359582	0.000734284	0.00910439	-0.710095	1.92443e-12	4.57116e-11
ENSMUSG00000027175	320554	Tcp11l1	0.636883	0.00074079	0.0091774	#N/A	#N/A	#N/A
ENSMUSG00000033308	99586	Dpyd	0.444998	0.000746596	0.00924162	-1.16957	2.35194e-07	2.31905e-06
ENSMUSG00000067081	208372	Asb18	0.55521	0.000748487	0.0092496	#N/A	#N/A	#N/A
ENSMUSG00000001763	232670	Tspan33	0.758814	0.00074842	0.0092496	#N/A	#N/A	#N/A
ENSMUSG00000046794	244416	Ppp1r3b	0.554888	0.000754746	0.0093192	#N/A	#N/A	#N/A
ENSMUSG00000029672	27999	Fam3c	-0.396813	0.000759791	0.0093737	#N/A	#N/A	#N/A
ENSMUSG00000028261	68493	Ndufaf4	-0.479946	0.000762769	0.00940263	#N/A	#N/A	#N/A
ENSMUSG00000029465	56378	Arpc3	-0.43169	0.000765393	0.00942715	0.729886	3.30182e-09	4.67344e-08
ENSMUSG00000020261	215335	Slc36a1	0.494777	0.000766974	0.0094388	#N/A	#N/A	#N/A
ENSMUSG00000002885	26364	Cd97	-0.384391	0.000771237	0.00948341	#N/A	#N/A	#N/A
ENSMUSG00000036292	207798	Gramd1c	0.743087	0.00077329	0.00950079	-0.704072	0.00109092	0.00449458
ENSMUSG00000031668	13666	Eif2ak3	-0.40598	0.000774768	0.00951107	#N/A	#N/A	#N/A
ENSMUSG00000044534	59289	Ccbp2	-0.692625	0.000776097	0.00951953	#N/A	#N/A	#N/A
ENSMUSG00000020728	76380	Ccdc46	0.600399	0.000779783	0.00955685	#N/A	#N/A	#N/A
ENSMUSG00000031595	68797	Pdgfrl	-0.640904	0.000781721	0.0095727	1.12311	8.99166e-08	9.62865e-07
ENSMUSG00000055067	69726	Smyd3	0.50569	0.000785213	0.00960754	-0.629533	0.000617286	0.00274357
ENSMUSG00000006373	53328	Pgrmc1	-0.434184	0.000786835	0.00961155	#N/A	#N/A	#N/A
ENSMUSG00000037989	75607	Wnk2	0.565712	0.000786524	0.00961155	#N/A	#N/A	#N/A
ENSMUSG00000054320	270091	Lrrc36	0.847021	0.000789218	0.00962483	#N/A	#N/A	#N/A
ENSMUSG00000028369	64817	Svep1	-0.588015	0.00078891	0.00962483	0.981087	3.26766e-17	1.60298e-15
ENSMUSG00000066235	215494	C85492	0.458474	0.000790452	0.00963197	#N/A	#N/A	#N/A
ENSMUSG00000087651	69784	1500009L16Rik	-0.912207	0.000793388	0.00965982	1.75734	8.02122e-11	1.48538e-09
ENSMUSG00000047735	209086	Samd9l	-0.496648	0.000797433	0.00970112	#N/A	#N/A	#N/A
ENSMUSG00000030245	66964	Golt1b	-0.438452	0.000798251	0.00970312	#N/A	#N/A	#N/A
ENSMUSG00000041057	72515	Wdr43	-0.394946	0.000802161	0.00974268	#N/A	#N/A	#N/A
ENSMUSG00000032175	54721	Tyk2	0.474331	0.000805973	0.00978099	#N/A	#N/A	#N/A
ENSMUSG00000018659	103711	Pnpo	0.420164	0.000807716	0.00979414	#N/A	#N/A	#N/A
ENSMUSG00000019920	110829	Lims1	-0.324284	0.000811141	0.00982764	#N/A	#N/A	#N/A
ENSMUSG00000025196	93721	Cpn1	0.932688	0.000812664	0.00983806	#N/A	#N/A	#N/A
ENSMUSG00000047565	64833	Acot10	-0.618352	0.000815456	0.00984779	0.63283	3.1008e-05	0.000194675
ENSMUSG00000020116	66249	Pno1	-0.436446	0.00081489	0.00984779	#N/A	#N/A	#N/A
ENSMUSG00000031342	14758	Gpm6b	-0.606888	0.000815173	0.00984779	#N/A	#N/A	#N/A
ENSMUSG00000035725	19108	Prkx	-0.425433	0.000818175	0.0098726	#N/A	#N/A	#N/A
ENSMUSG00000040152	21825	Thbs1	-0.949216	0.000833163	0.0100371	2.91248	1.29169e-15	4.89294e-14
ENSMUSG00000024691	107373	Fam111a	-0.507816	0.000832523	0.0100371	#N/A	#N/A	#N/A
ENSMUSG00000043300	26879	B3galnt1	-0.580893	0.000841776	0.0101081	0.728476	5.13361e-06	3.79654e-05
ENSMUSG00000006435	18011	Neurl1a	0.694212	0.000839765	0.0101081	#N/A	#N/A	#N/A
ENSMUSG00000002881	17936	Nab1	-0.374391	0.000840786	0.0101081	#N/A	#N/A	#N/A
ENSMUSG00000025407	14632	Gli1	0.79131	0.000841489	0.0101081	#N/A	#N/A	#N/A
ENSMUSG00000030447	20430	Cyfip1	-0.409187	0.000843577	0.0101216	#N/A	#N/A	#N/A
ENSMUSG00000044813	230126	Shb	-0.55738	0.00084516	0.0101324	0.586568	0.0033598	0.0119074
ENSMUSG00000040841	20475	Six5	0.549536	0.000846791	0.0101437	#N/A	#N/A	#N/A
ENSMUSG00000050954	67911	Zfp169	0.577513	0.00084932	0.0101658	#N/A	#N/A	#N/A
ENSMUSG00000001847	19353	Rac1	-0.391269	0.000858703	0.0102699	#N/A	#N/A	#N/A
ENSMUSG00000032815	14087	Fanca	0.83795	0.000863427	0.0103181	1.02194	0.00101622	0.00422649
ENSMUSG00000009739	19009	Pou6f1	0.458553	0.00086487	0.010327	#N/A	#N/A	#N/A
ENSMUSG00000045103	13405	Dmd	0.400099	0.00086629	0.0103356	-1.61224	6.95749e-28	1.12143e-25
ENSMUSG00000053279	11668	Aldh1a1	-0.551661	0.000868477	0.0103534	1.02793	4.08916e-13	1.06941e-11
ENSMUSG00000022661	17470	Cd200	-0.381234	0.000871603	0.0103823	0.640391	6.95653e-07	6.2012e-06
ENSMUSG00000020601	217410	Trib2	-0.475183	0.000873168	0.0103927	0.945445	1.03067e-12	2.5163e-11
ENSMUSG00000023886	64074	Smoc2	-0.671779	0.000876181	0.0104202	#N/A	#N/A	#N/A
ENSMUSG00000017167	53321	Cntnap1	0.558191	0.000877278	0.0104249	-0.747837	0.00122944	0.00496936
ENSMUSG00000040387	212390	Klhl32	0.718491	0.00088927	0.0105589	#N/A	#N/A	#N/A
ENSMUSG00000052681	215449	Rap1b	-0.57132	0.000892302	0.0105865	#N/A	#N/A	#N/A
ENSMUSG00000027162	22343	Lin7c	-0.455008	0.000893298	0.0105898	#N/A	#N/A	#N/A
ENSMUSG00000022607	14083	Ptk2	-0.379601	0.000897937	0.0106363	#N/A	#N/A	#N/A
ENSMUSG00000022010	21807	Tsc22d1	-0.378058	0.000909003	0.0107588	#N/A	#N/A	#N/A
ENSMUSG00000040472	56187	Rabggta	0.450168	0.000915744	0.01083	#N/A	#N/A	#N/A
ENSMUSG00000079018	17067	Ly6c1	-0.433267	0.000919675	0.0108635	#N/A	#N/A	#N/A
ENSMUSG00000022912	19128	Pros1	-0.43159	0.000920045	0.0108635	#N/A	#N/A	#N/A
ENSMUSG00000063952	268936	Brpf3	0.543277	0.000923048	0.0108903	#N/A	#N/A	#N/A
ENSMUSG00000022270	66270	Fam134b	-0.545988	0.00092474	0.0109017	-0.767109	4.02265e-06	3.05784e-05
ENSMUSG00000019951	75089	Uhrf1bp1l	-0.434313	0.000930379	0.0109334	#N/A	#N/A	#N/A
ENSMUSG00000029622	434782	Arpc1b	-0.687951	0.000930364	0.0109334	0.871546	3.75033e-11	7.35904e-10
ENSMUSG00000040761	56381	Spen	0.509986	0.000929439	0.0109334	#N/A	#N/A	#N/A
ENSMUSG00000045039	269878	Megf8	0.464477	0.000952412	0.0111658	#N/A	#N/A	#N/A
ENSMUSG00000020585	17775	Laptm4a	-0.325152	0.000951941	0.0111658	#N/A	#N/A	#N/A
ENSMUSG00000022211	268747	Lrrc16b	0.756897	0.000955098	0.0111885	#N/A	#N/A	#N/A
ENSMUSG00000042050	217935	Wdr60	-0.605165	0.000962202	0.0112602	#N/A	#N/A	#N/A
ENSMUSG00000036112	56307	Metap2	-0.408072	0.000963073	0.0112602	#N/A	#N/A	#N/A
ENSMUSG00000042390	229542	Gatad2b	0.616857	0.000963491	0.0112602	#N/A	#N/A	#N/A
ENSMUSG00000037685	11980	Atp8a1	0.426512	0.000966383	0.0112713	-0.612949	5.12641e-06	3.79487e-05
ENSMUSG00000001305	67223	Rrp15	-0.555778	0.00096672	0.0112713	#N/A	#N/A	#N/A
ENSMUSG00000006522	16426	Itih3	0.820031	0.00096664	0.0112713	#N/A	#N/A	#N/A
ENSMUSG00000033066	14457	Gas7	-0.501729	0.000969528	0.0112952	0.596435	0.00251199	0.00928607
ENSMUSG00000036120	19727	Rfxank	-0.568715	0.000976748	0.011326	#N/A	#N/A	#N/A
ENSMUSG00000064061	224170	Dzip3	-0.440953	0.000973109	0.011326	-0.650886	1.733e-08	2.13697e-07
ENSMUSG00000037341	236727	Slc9a7	0.486831	0.000974642	0.011326	0.850195	3.67259e-07	3.46548e-06
ENSMUSG00000040254	108151	Sema3d	-0.626408	0.000974546	0.011326	#N/A	#N/A	#N/A
ENSMUSG00000071342	380755	Gm889	0.46186	0.000975294	0.011326	-1.22473	4.19295e-14	1.25916e-12
ENSMUSG00000041040	72750	Fam117b	-0.617547	0.000976651	0.011326	#N/A	#N/A	#N/A
ENSMUSG00000074656	100040220	Eif2s2	-0.530816	0.000980813	0.0113643	#N/A	#N/A	#N/A
ENSMUSG00000043323	381668	Fbrsl1	0.440369	0.000981828	0.0113672	#N/A	#N/A	#N/A
ENSMUSG00000026648	227525	Dclre1c	0.5524	0.000982744	0.0113689	#N/A	#N/A	#N/A
ENSMUSG00000027134	99010	Lpcat4	-0.707847	0.000989886	0.0114426	#N/A	#N/A	#N/A
ENSMUSG00000058571	23888	Gpc6	-0.457002	0.000994383	0.0114857	0.792675	8.84518e-09	1.14617e-07
ENSMUSG00000028552	13858	Eps15	-0.42521	0.000998789	0.0115186	#N/A	#N/A	#N/A
ENSMUSG00000060063	11690	Alox5ap	-0.659426	0.00099859	0.0115186	1.27932	1.08249e-10	1.98135e-09
ENSMUSG00000048582	14611	Gja3	0.473285	0.00100245	0.0115481	-0.590667	0.000286648	0.001404
ENSMUSG00000022822	27416	Abcc5	0.40984	0.0010029	0.0115481	-0.722565	8.49401e-08	9.15846e-07
ENSMUSG00000021884	56794	Hacl1	0.484757	0.00100464	0.0115503	#N/A	#N/A	#N/A
ENSMUSG00000009905	70750	Kdsr	-0.494371	0.00100719	0.0115706	#N/A	#N/A	#N/A
ENSMUSG00000024352	71242	Spata24	0.638243	0.00101892	0.0116864	#N/A	#N/A	#N/A
ENSMUSG00000035245	101351	A130022J15Rik	-0.445608	0.0010181	0.0116864	#N/A	#N/A	#N/A
ENSMUSG00000053985	243906	Zfp14	0.575299	0.00101963	0.0116864	-0.675403	1.53294e-05	0.000102516
ENSMUSG00000021091	20716	Serpina3n	0.885292	0.00102041	0.0116864	#N/A	#N/A	#N/A
ENSMUSG00000021823	22330	Vcl	-0.402144	0.00102316	0.0117088	#N/A	#N/A	#N/A
ENSMUSG00000049411	338363	6030446N20Rik	0.6004	0.0010247	0.0117174	#N/A	#N/A	#N/A
ENSMUSG00000017831	271457	Rab5a	-0.383552	0.0010269	0.0117335	#N/A	#N/A	#N/A
ENSMUSG00000033565	93686	Rbfox2	0.320175	0.00102883	0.0117375	#N/A	#N/A	#N/A
ENSMUSG00000067818	98932	Myl9	-0.905836	0.00102824	0.0117375	1.14197	2.89853e-12	6.67421e-11
ENSMUSG00000037788	232023	Vopp1	-0.370264	0.00102974	0.0117389	#N/A	#N/A	#N/A
ENSMUSG00000030782	21804	Tgfb1i1	-0.553611	0.00103616	0.011803	0.988457	4.97417e-07	4.56019e-06
ENSMUSG00000034981	231440	Parm1	0.311381	0.00104773	0.0119256	-0.705958	1.48847e-06	1.24073e-05
ENSMUSG00000026377	67949	Mki67ip	-0.422517	0.00105304	0.0119769	#N/A	#N/A	#N/A
ENSMUSG00000068798	109905	Rap1a	-0.453279	0.00105939	0.0120399	#N/A	#N/A	#N/A
ENSMUSG00000000078	23849	Klf6	-0.628959	0.0010629	0.0120635	0.67429	6.29111e-07	5.66558e-06
ENSMUSG00000035372	72056	1810055G02Rik	-0.537716	0.00106661	0.0120943	0.976938	5.48257e-10	8.87323e-09
ENSMUSG00000005667	17768	Mthfd2	0.596955	0.00107073	0.0121317	0.895968	9.41093e-06	6.57475e-05
ENSMUSG00000024331	13506	Dsc2	0.383106	0.00107878	0.0122136	-2.47647	2.56723e-58	2.89657e-55
ENSMUSG00000000278	74617	Scpep1	-0.380942	0.00108174	0.0122284	0.637873	3.10333e-07	2.99086e-06
ENSMUSG00000058297	94214	Spock2	0.55686	0.00108163	0.0122284	-0.818314	5.5394e-05	0.000325522
ENSMUSG00000048960	109294	Prex2	-0.365844	0.0010918	0.0123327	-1.07448	4.6466e-13	1.2072e-11
ENSMUSG00000000787	13205	Ddx3x	-0.594061	0.0010972	0.0123844	#N/A	#N/A	#N/A
ENSMUSG00000051223	66882	Bzw1	-0.36277	0.001101	0.0124178	#N/A	#N/A	#N/A
ENSMUSG00000040687	228355	Madd	0.461671	0.0011036	0.0124377	#N/A	#N/A	#N/A
ENSMUSG00000035863	18483	Palm	-0.460475	0.00110673	0.0124635	#N/A	#N/A	#N/A
ENSMUSG00000051579	66684	Tceal8	-0.513911	0.00110848	0.0124738	#N/A	#N/A	#N/A
ENSMUSG00000033526	327655	Ppip5k1	0.444672	0.0011157	0.012536	#N/A	#N/A	#N/A
ENSMUSG00000024360	225363	Etf1	-0.41477	0.00112097	0.0125857	#N/A	#N/A	#N/A
ENSMUSG00000046275	237858	Tusc5	-0.773044	0.0011261	0.0125862	#N/A	#N/A	#N/A
ENSMUSG00000007836	77134	Hnrnpa0	-0.398198	0.00112513	0.0125862	#N/A	#N/A	#N/A
ENSMUSG00000009291	108705	Pttg1ip	-0.335544	0.00112279	0.0125862	#N/A	#N/A	#N/A
ENSMUSG00000025982	81898	Sf3b1	-0.416633	0.00112364	0.0125862	#N/A	#N/A	#N/A
ENSMUSG00000030401	20167	Rtn2	0.377113	0.00112364	0.0125862	-0.765713	3.61716e-07	3.41522e-06
ENSMUSG00000021575	11624	Ahrr	0.873024	0.00113651	0.0126834	-1.00932	0.00349059	0.012291
ENSMUSG00000015133	233328	Lrrk1	0.446605	0.0011361	0.0126834	#N/A	#N/A	#N/A
ENSMUSG00000030433	381836	Sbk2	0.455416	0.00114427	0.0127605	-4.01153	5.1095e-80	2.01774e-76
ENSMUSG00000033191	21846	Tie1	-0.496635	0.00114798	0.0127923	#N/A	#N/A	#N/A
ENSMUSG00000054920	71778	Klhl5	-0.490935	0.00115048	0.0128105	#N/A	#N/A	#N/A
ENSMUSG00000057123	14613	Gja5	0.461231	0.00115597	0.012862	-4.15744	3.55599e-103	1.87235e-99
ENSMUSG00000022114	24064	Spry2	-0.451	0.00115739	0.0128681	0.684076	9.62063e-06	6.68577e-05
ENSMUSG00000036585	14164	Fgf1	0.427151	0.00115927	0.0128794	#N/A	#N/A	#N/A
ENSMUSG00000030095	74122	Tmem43	-0.391263	0.00116128	0.0128922	#N/A	#N/A	#N/A
ENSMUSG00000025316	53325	Banp	0.651647	0.00116259	0.012897	#N/A	#N/A	#N/A
ENSMUSG00000068299	75541	1700019G17Rik	0.655901	0.0011764	0.0130405	#N/A	#N/A	#N/A
ENSMUSG00000032475	17973	Nck1	-0.375036	0.0011775	0.0130429	#N/A	#N/A	#N/A
ENSMUSG00000021811	108671	Dnajc9	0.46085	0.00118143	0.0130767	#N/A	#N/A	#N/A
ENSMUSG00000044934	238673	Zfp367	-0.38932	0.00118978	0.0131495	#N/A	#N/A	#N/A
ENSMUSG00000052997	50995	Uba2	-0.329278	0.00118971	0.0131495	#N/A	#N/A	#N/A
ENSMUSG00000022773	106369	Ypel1	0.725773	0.001194	0.0131864	#N/A	#N/A	#N/A
ENSMUSG00000054321	72504	Taf4b	-0.495202	0.00119842	0.0132155	#N/A	#N/A	#N/A
ENSMUSG00000000197	338370	Nalcn	-0.559851	0.00119788	0.0132155	#N/A	#N/A	#N/A
ENSMUSG00000034109	73124	Golim4	-0.33754	0.00120634	0.0132832	#N/A	#N/A	#N/A
ENSMUSG00000039518	386463	Cdsn	0.903473	0.00120847	0.0132967	#N/A	#N/A	#N/A
ENSMUSG00000046329	66972	Slc25a23	0.358552	0.00121717	0.0133825	#N/A	#N/A	#N/A
ENSMUSG00000028082	27059	Sh3d19	-0.366973	0.00122583	0.0134678	#N/A	#N/A	#N/A
ENSMUSG00000024462	54393	Gabbr1	0.463884	0.00123159	0.0135211	#N/A	#N/A	#N/A
ENSMUSG00000053007	231991	Creb5	-0.591316	0.00123553	0.0135544	#N/A	#N/A	#N/A
ENSMUSG00000038366	16796	Lasp1	-0.466599	0.00124394	0.0136365	0.673519	9.06891e-05	0.000497923
ENSMUSG00000058441	406218	Panx2	0.624424	0.00125118	0.0137058	-2.33971	9.76278e-13	2.3872e-11
ENSMUSG00000032350	14629	Gclc	-0.626586	0.00125267	0.013712	#N/A	#N/A	#N/A
ENSMUSG00000064080	14115	Fbln2	-0.521018	0.00126236	0.0138078	1.65519	9.55184e-26	1.19747e-23
ENSMUSG00000029710	13846	Ephb4	-0.475202	0.00126685	0.0138328	#N/A	#N/A	#N/A
ENSMUSG00000060802	12010	B2m	-0.50857	0.00126744	0.0138328	1.20903	2.24224e-21	1.76211e-19
ENSMUSG00000057337	53374	Chst3	-0.795173	0.001272	0.0138725	0.886021	0.00285097	0.0103598
ENSMUSG00000079144	319266	A130010J15Rik	0.604017	0.0012823	0.0139745	#N/A	#N/A	#N/A
ENSMUSG00000030876	59052	Mettl9	-0.368844	0.00128329	0.0139751	0.630661	3.4962e-12	7.96911e-11
ENSMUSG00000007827	232339	Ankrd26	0.485314	0.00128565	0.0139905	-1.25916	1.84351e-07	1.85355e-06
ENSMUSG00000018167	59045	Stard3	0.471501	0.00129492	0.014081	#N/A	#N/A	#N/A
ENSMUSG00000015766	13860	Eps8	-0.431859	0.00129698	0.0140931	#N/A	#N/A	#N/A
ENSMUSG00000037355	71101	4933407H18Rik	0.448492	0.0013005	0.014121	-0.928838	7.80332e-10	1.23508e-08
ENSMUSG00000008845	93671	Cd163	-0.476137	0.001302	0.0141271	#N/A	#N/A	#N/A
ENSMUSG00000022533	224088	Atp13a3	-0.51184	0.00130657	0.0141663	#N/A	#N/A	#N/A
ENSMUSG00000038416	69957	Cdc16	-0.388127	0.00131147	0.014209	#N/A	#N/A	#N/A
ENSMUSG00000026238	19231	Ptma	-0.436193	0.00131573	0.0142448	#N/A	#N/A	#N/A
ENSMUSG00000006930	15114	Hap1	0.683045	0.00132835	0.0143673	#N/A	#N/A	#N/A
ENSMUSG00000052040	50794	Klf13	-0.486215	0.00132898	0.0143673	#N/A	#N/A	#N/A
ENSMUSG00000052459	11964	Atp6v1a	-0.374212	0.00133082	0.0143767	#N/A	#N/A	#N/A
ENSMUSG00000036661	105841	Dennd3	-0.592207	0.00133815	0.014442	#N/A	#N/A	#N/A
ENSMUSG00000020361	15525	Hspa4	-0.355786	0.0013388	0.014442	#N/A	#N/A	#N/A
ENSMUSG00000055775	17885	Myh8	-0.863975	0.00133989	0.0144432	1.14009	7.97819e-05	0.000446575
ENSMUSG00000039781	12009	Azi1	0.513844	0.0013489	0.0145256	#N/A	#N/A	#N/A
ENSMUSG00000028719	66588	Cmpk1	-0.480795	0.00135046	0.0145256	0.588243	2.16183e-06	1.73518e-05
ENSMUSG00000015217	15354	Hmgb3	-0.572503	0.00134967	0.0145256	#N/A	#N/A	#N/A
ENSMUSG00000040690	107581	Col16a1	-0.489275	0.0013545	0.0145585	1.68046	2.05822e-20	1.45792e-18
ENSMUSG00000003200	20405	Sh3gl1	-0.402123	0.00136117	0.0146196	#N/A	#N/A	#N/A
ENSMUSG00000022949	209195	Clic6	0.820492	0.00136893	0.0146923	-1.6354	1.36988e-05	9.24728e-05
ENSMUSG00000021127	12192	Zfp36l1	0.454278	0.00137106	0.0147045	#N/A	#N/A	#N/A
ENSMUSG00000038970	231876	Lmtk2	0.338664	0.00138812	0.0148767	#N/A	#N/A	#N/A
ENSMUSG00000047139	12484	Cd24a	-0.558464	0.00138997	0.0148858	1.32789	1.41534e-12	3.40285e-11
ENSMUSG00000014905	27362	Dnajb9	-0.455338	0.00139528	0.0149268	#N/A	#N/A	#N/A
ENSMUSG00000034312	232227	Iqsec1	0.486765	0.00139581	0.0149268	#N/A	#N/A	#N/A
ENSMUSG00000061533	75216	4930534B04Rik	0.466799	0.00140688	0.0150158	-0.629864	0.00142891	0.00567144
ENSMUSG00000025217	12234	Btrc	0.395277	0.00140716	0.0150158	#N/A	#N/A	#N/A
ENSMUSG00000028524	73094	Sgip1	0.78617	0.00140667	0.0150158	-1.10563	0.00238839	0.00889257
ENSMUSG00000024098	65960	Twsg1	-0.357889	0.00141074	0.0150432	#N/A	#N/A	#N/A
ENSMUSG00000019278	13479	Dpep1	-0.582779	0.00141987	0.0151297	#N/A	#N/A	#N/A
ENSMUSG00000031503	12827	Col4a2	-0.582099	0.00142422	0.0151652	1.41679	1.76593e-15	6.56344e-14
ENSMUSG00000030224	20901	Strap	-0.315813	0.0014291	0.0152038	#N/A	#N/A	#N/A
ENSMUSG00000024260	269003	Sap130	0.403302	0.0014299	0.0152038	#N/A	#N/A	#N/A
ENSMUSG00000029063	192185	Nadk	-0.405081	0.00143256	0.0152213	#N/A	#N/A	#N/A
ENSMUSG00000020078	30930	Vps26a	-0.331921	0.00144058	0.0152955	#N/A	#N/A	#N/A
ENSMUSG00000025287	56360	Acot9	-0.427252	0.00144189	0.0152985	0.644276	7.13146e-06	5.10765e-05
ENSMUSG00000001017	66511	2500003M10Rik	-0.31482	0.00145236	0.0153986	#N/A	#N/A	#N/A
ENSMUSG00000027660	20482	Skil	-0.482994	0.00145824	0.0154499	#N/A	#N/A	#N/A
ENSMUSG00000074802	237436	Gas2l3	-0.698457	0.00146196	0.0154749	1.73678	7.27106e-17	3.36814e-15
ENSMUSG00000004085	65964	B230120H23Rik	0.345569	0.00146269	0.0154749	-0.636596	1.72451e-05	0.000114048
ENSMUSG00000005886	17978	Ncoa2	0.383076	0.00146837	0.015524	#N/A	#N/A	#N/A
ENSMUSG00000078716	242409	Tmem8b	0.402494	0.00147046	0.015535	#N/A	#N/A	#N/A
ENSMUSG00000020847	380714	Rph3al	0.674299	0.00147502	0.0155721	#N/A	#N/A	#N/A
ENSMUSG00000035506	171286	Slc12a8	-0.831752	0.0014773	0.0155851	-1.41464	7.62507e-06	5.43282e-05
ENSMUSG00000022285	22631	Ywhaz	-0.450424	0.00148172	0.0156206	0.591203	3.94233e-07	3.69353e-06
ENSMUSG00000079037	19122	Prnp	-0.358199	0.00148828	0.0156786	#N/A	#N/A	#N/A
ENSMUSG00000030465	234353	Psd3	0.471114	0.00148994	0.0156819	-2.33012	2.39318e-77	7.56055e-74
ENSMUSG00000022371	12818	Col14a1	-0.618631	0.0014907	0.0156819	0.665326	2.95802e-05	0.000186304
ENSMUSG00000003531	13353	Dgcr6	0.383544	0.00149275	0.0156924	#N/A	#N/A	#N/A
ENSMUSG00000049907	68939	Rasl11b	-0.54173	0.00149966	0.0157488	1.55204	1.43974e-14	4.66028e-13
ENSMUSG00000034066	227377	Farp2	0.422042	0.00150996	0.0158396	#N/A	#N/A	#N/A
ENSMUSG00000054277	66251	Arfgap3	-0.351706	0.00152054	0.0159394	#N/A	#N/A	#N/A
ENSMUSG00000019843	14360	Fyn	-0.382561	0.00152262	0.0159499	#N/A	#N/A	#N/A
ENSMUSG00000030030	71837	1700003E16Rik	0.777308	0.00152382	0.0159513	#N/A	#N/A	#N/A
ENSMUSG00000030470	13009	Csrp3	-0.426288	0.00153139	0.0159967	#N/A	#N/A	#N/A
ENSMUSG00000041747	105372	Utp15	-0.41343	0.00152943	0.0159967	#N/A	#N/A	#N/A
ENSMUSG00000027996	20319	Sfrp2	-0.697763	0.00154491	0.016126	3.0273	3.89141e-66	7.68358e-63
ENSMUSG00000024511	80718	Rab27b	-0.570687	0.00154594	0.016126	0.76325	0.000261987	0.00129688
ENSMUSG00000033253	230676	Szt2	0.468206	0.00155608	0.0162204	#N/A	#N/A	#N/A
ENSMUSG00000020363	14584	Gfpt2	-0.57999	0.00156632	0.0163157	#N/A	#N/A	#N/A
ENSMUSG00000044461	219134	Shisa2	0.60558	0.0015706	0.0163487	-1.51173	5.676e-07	5.15573e-06
ENSMUSG00000018143	17135	Mafk	-0.598188	0.00157738	0.0164078	0.800373	1.53115e-08	1.92411e-07
ENSMUSG00000035284	320528	Vps13c	0.45786	0.00161595	0.0167973	-1.02154	1.01547e-16	4.5961e-15
ENSMUSG00000089989	14256	Flt3l	0.593718	0.00162192	0.0168475	#N/A	#N/A	#N/A
ENSMUSG00000041119	18585	Pde9a	0.507167	0.00162365	0.0168538	#N/A	#N/A	#N/A
ENSMUSG00000039578	232035	Fam190a	0.660311	0.00162781	0.0168851	-1.00546	0.000301226	0.0014654
ENSMUSG00000021245	217716	Mlh3	0.432961	0.00164153	0.0170036	-1.16318	5.46287e-16	2.19571e-14
ENSMUSG00000043943	72560	Naalad2	-0.507836	0.0016414	0.0170036	#N/A	#N/A	#N/A
ENSMUSG00000033618	71751	Map3k13	0.621114	0.00164348	0.017012	-1.06836	0.000180213	0.000923934
ENSMUSG00000010047	15587	Hyal2	-0.530355	0.00164866	0.0170419	#N/A	#N/A	#N/A
ENSMUSG00000029415	231452	Sdad1	-0.40628	0.0016478	0.0170419	#N/A	#N/A	#N/A
ENSMUSG00000036218	239618	Pdzrn4	0.52412	0.0016505	0.0170491	-2.17713	5.93554e-29	1.03031e-26
ENSMUSG00000026315	20725	Serpinb8	-0.521535	0.00165781	0.0171126	0.662306	0.00425511	0.0146117
ENSMUSG00000023036	93717	Pcdhga9	0.588529	0.00166521	0.0171771	-0.768724	6.22492e-06	4.52087e-05
ENSMUSG00000074457	67860	S100a16	-0.458189	0.00167857	0.0172909	0.787221	2.99094e-09	4.27674e-08
ENSMUSG00000047067	67446	Dusp28	0.478776	0.00169231	0.0174203	#N/A	#N/A	#N/A
ENSMUSG00000020263	216190	Appl2	0.3707	0.00169482	0.0174341	-1.47584	1.4244e-34	3.62901e-32
ENSMUSG00000054509	328417	Parp4	0.433037	0.00169989	0.0174742	#N/A	#N/A	#N/A
ENSMUSG00000049252	94217	Lrp1b	0.645187	0.00171064	0.0175725	-1.72477	2.54187e-06	2.01462e-05
ENSMUSG00000028465	21894	Tln1	-0.365024	0.00171597	0.0175995	#N/A	#N/A	#N/A
ENSMUSG00000021072	72736	Tmx1	-0.476135	0.00171526	0.0175995	1.32657	4.19802e-13	1.09606e-11
ENSMUSG00000030562	50490	Nox4	-0.632318	0.00171682	0.0175995	0.708154	0.00119495	0.00484607
ENSMUSG00000031197	22327	Vbp1	-0.47351	0.00172574	0.0176422	#N/A	#N/A	#N/A
ENSMUSG00000023017	11419	Accn2	0.578551	0.00172247	0.0176422	#N/A	#N/A	#N/A
ENSMUSG00000029860	22793	Zyx	-0.498579	0.00172481	0.0176422	0.866015	8.59972e-08	9.25979e-07
ENSMUSG00000029171	66681	Pgm1	-0.574941	0.00173188	0.0176928	#N/A	#N/A	#N/A
ENSMUSG00000020869	98238	Lrrc59	-0.380949	0.00174911	0.0178565	0.585579	6.75991e-05	0.000386882
ENSMUSG00000031530	319520	Dusp4	-0.662759	0.00175163	0.01787	1.67258	6.68281e-14	1.94632e-12
ENSMUSG00000070871	227210	Ccnyl1	-0.540805	0.00175797	0.0179223	#N/A	#N/A	#N/A
ENSMUSG00000036323	66661	Srp72	-0.371049	0.00176826	0.0180149	#N/A	#N/A	#N/A
ENSMUSG00000029022	28010	Miip	0.468605	0.0017721	0.0180416	#N/A	#N/A	#N/A
ENSMUSG00000032842	224814	Abcc10	0.531243	0.00178538	0.0181644	#N/A	#N/A	#N/A
ENSMUSG00000074874	13025	Ctla2b	-0.754238	0.00179945	0.018295	#N/A	#N/A	#N/A
ENSMUSG00000002329	67881	Mdp1	0.512594	0.00180539	0.0183429	#N/A	#N/A	#N/A
ENSMUSG00000037363	270035	Letm2	0.630684	0.00180992	0.0183763	-0.927119	2.67326e-05	0.000169995
ENSMUSG00000031885	12400	Cbfb	-0.400747	0.00182844	0.0185517	#N/A	#N/A	#N/A
ENSMUSG00000041372	330406	B4galnt3	-0.885637	0.00183591	0.0185894	#N/A	#N/A	#N/A
ENSMUSG00000030983	66165	Bccip	-0.356	0.00183554	0.0185894	#N/A	#N/A	#N/A
ENSMUSG00000021244	56531	Ylpm1	0.391548	0.00183379	0.0185894	#N/A	#N/A	#N/A
ENSMUSG00000024436	66973	Mrps18b	-0.558348	0.00183766	0.0185945	#N/A	#N/A	#N/A
ENSMUSG00000038319	16511	Kcnh2	0.48111	0.00184434	0.0186493	-0.747432	3.1259e-07	3.00894e-06
ENSMUSG00000055407	17760	Mtap6	-0.677207	0.00185455	0.0187398	0.765652	0.000782316	0.00337636
ENSMUSG00000043998	217664	Mgat2	-0.362553	0.00185709	0.0187527	#N/A	#N/A	#N/A
ENSMUSG00000040282	399568	BC052040	0.720937	0.00186032	0.0187726	#N/A	#N/A	#N/A
ENSMUSG00000006498	19205	Ptbp1	-0.426175	0.00186334	0.0187837	0.80041	1.80845e-09	2.66975e-08
ENSMUSG00000021464	26564	Ror2	0.581449	0.00186395	0.0187837	#N/A	#N/A	#N/A
ENSMUSG00000037211	24063	Spry1	-0.482201	0.0018679	0.0188107	1.18846	1.76768e-13	4.873e-12
ENSMUSG00000028496	70122	Mllt3	0.388482	0.00187223	0.0188415	#N/A	#N/A	#N/A
ENSMUSG00000066842	545370	Hmcn1	-0.352037	0.0018737	0.0188436	#N/A	#N/A	#N/A
ENSMUSG00000031701	56445	Dnaja2	-0.382033	0.00188177	0.0189119	#N/A	#N/A	#N/A
ENSMUSG00000029512	22241	Ulk1	0.392747	0.00190746	0.0191572	#N/A	#N/A	#N/A
ENSMUSG00000049969	71801	Plekhf2	-0.474747	0.00190898	0.0191594	#N/A	#N/A	#N/A
ENSMUSG00000070284	331026	Gmppb	-0.455574	0.00192269	0.019284	0.668128	7.22174e-05	0.000410488
ENSMUSG00000044162	414084	Tnip3	0.758758	0.00192904	0.0193346	#N/A	#N/A	#N/A
ENSMUSG00000031983	69551	2310022B05Rik	-0.428076	0.00193196	0.0193509	#N/A	#N/A	#N/A
ENSMUSG00000052374	11472	Actn2	0.37477	0.00194719	0.0194903	#N/A	#N/A	#N/A
ENSMUSG00000036356	234356	Csgalnact1	-0.459952	0.00195181	0.0195233	#N/A	#N/A	#N/A
ENSMUSG00000018846	211347	Pank3	-0.465634	0.00196236	0.0196025	#N/A	#N/A	#N/A
ENSMUSG00000026500	66359	Fam36a	-0.465578	0.0019614	0.0196025	#N/A	#N/A	#N/A
ENSMUSG00000053965	242202	Pde5a	-0.481438	0.00196557	0.0196214	#N/A	#N/A	#N/A
ENSMUSG00000039234	69608	Sec24d	-0.368052	0.00198515	0.0197318	#N/A	#N/A	#N/A
ENSMUSG00000035202	102436	Lars2	0.842417	0.00198107	0.0197318	#N/A	#N/A	#N/A
ENSMUSG00000026305	16978	Lrrfip1	-0.340658	0.00198589	0.0197318	#N/A	#N/A	#N/A
ENSMUSG00000048728	237758	Zfp454	0.765104	0.00198593	0.0197318	-1.00206	0.00415467	0.0142979
ENSMUSG00000031176	67117	Dynlt3	-0.376332	0.0019788	0.0197318	#N/A	#N/A	#N/A
ENSMUSG00000028945	19744	Rheb	-0.333993	0.00198486	0.0197318	#N/A	#N/A	#N/A
ENSMUSG00000020388	30794	Pdlim4	0.52374	0.00199842	0.0198426	-1.17503	2.75351e-16	1.17236e-14
ENSMUSG00000021408	19766	Ripk1	-0.43119	0.00200059	0.0198509	#N/A	#N/A	#N/A
ENSMUSG00000044949	327900	Ubtd2	-0.407289	0.00200859	0.0199169	0.762278	1.05439e-10	1.93439e-09
ENSMUSG00000016510	76366	Mtif3	0.424929	0.00201016	0.0199192	#N/A	#N/A	#N/A
ENSMUSG00000042251	212933	Pm20d1	0.503338	0.00202746	0.0200772	-0.893622	5.29574e-05	0.00031295
ENSMUSG00000038604	75687	Fam65a	0.587802	0.0020423	0.0201923	#N/A	#N/A	#N/A
ENSMUSG00000045954	20324	Sdpr	-0.412815	0.00204314	0.0201923	#N/A	#N/A	#N/A
ENSMUSG00000026589	89867	Sec16b	0.540563	0.00204315	0.0201923	#N/A	#N/A	#N/A
ENSMUSG00000058624	14544	Gda	-0.452363	0.00204657	0.0202126	#N/A	#N/A	#N/A
ENSMUSG00000055313	319207	Pgbd1	0.649061	0.00205144	0.0202314	-0.931646	0.00117347	0.0047823
ENSMUSG00000008305	21885	Tle1	-0.406869	0.00204986	0.0202314	#N/A	#N/A	#N/A
ENSMUSG00000043831	75099	Lysmd4	0.468599	0.00205256	0.0202314	#N/A	#N/A	#N/A
ENSMUSG00000063568	231986	Jazf1	-0.591106	0.00205468	0.0202389	#N/A	#N/A	#N/A
ENSMUSG00000034055	18679	Phka1	0.352003	0.00205692	0.0202475	-0.703823	2.45203e-11	4.95298e-10
ENSMUSG00000034949	103406	Zfr2	0.52932	0.00206567	0.0203201	-0.907828	1.90747e-05	0.000125126
ENSMUSG00000072662	545893	Gm5887	0.833761	0.00207527	0.0204011	#N/A	#N/A	#N/A
ENSMUSG00000000901	17385	Mmp11	0.638412	0.00207926	0.0204268	-0.586112	0.00497947	0.0167175
ENSMUSG00000058756	21833	Thra	0.335422	0.00208082	0.0204286	#N/A	#N/A	#N/A
ENSMUSG00000029655	381695	N4bp2l2	-0.431373	0.00209476	0.0205519	#N/A	#N/A	#N/A
ENSMUSG00000022791	51789	Tnk2	0.474484	0.00210621	0.0205929	#N/A	#N/A	#N/A
ENSMUSG00000002771	14814	Grin2d	0.804137	0.00210483	0.0205929	#N/A	#N/A	#N/A
ENSMUSG00000007850	59013	Hnrnph1	-0.398109	0.00210477	0.0205929	#N/A	#N/A	#N/A
ENSMUSG00000046186	235505	Cd109	-0.529571	0.00210726	0.0205929	1.3542	6.87481e-08	7.55177e-07
ENSMUSG00000035392	227801	Dennd1a	0.357464	0.00210676	0.0205929	#N/A	#N/A	#N/A
ENSMUSG00000017466	21858	Timp2	-0.411189	0.00210523	0.0205929	#N/A	#N/A	#N/A
ENSMUSG00000028150	19885	Rorc	0.410503	0.00211446	0.0206362	#N/A	#N/A	#N/A
ENSMUSG00000024679	68774	Ms4a6d	-0.699898	0.00211433	0.0206362	1.75136	1.9935e-12	4.72814e-11
ENSMUSG00000033436	67416	Armcx2	-0.392379	0.00211668	0.0206442	0.659254	3.23964e-08	3.77385e-07
ENSMUSG00000041351	110351	Rap1gap	0.686475	0.00212484	0.0207102	-0.663255	0.00671361	0.0216204
ENSMUSG00000024781	16889	Lipa	-0.389291	0.00213029	0.0207246	0.725048	4.43916e-09	6.09748e-08
ENSMUSG00000016024	16803	Lbp	-0.532676	0.00212776	0.0207246	0.607224	6.32316e-05	0.000365596
ENSMUSG00000006850	71983	Tmco6	0.612108	0.0021305	0.0207246	#N/A	#N/A	#N/A
ENSMUSG00000056515	106572	Rab31	-0.405734	0.00213664	0.0207707	1.07325	2.5462e-17	1.26876e-15
ENSMUSG00000005732	19385	Ranbp1	-0.511063	0.00214837	0.0208711	0.758503	1.60776e-08	2.00919e-07
ENSMUSG00000003228	14773	Grk5	0.410954	0.0021578	0.020949	#N/A	#N/A	#N/A
ENSMUSG00000046034	432940	Fam105b	-0.422695	0.00216531	0.0209726	0.729961	7.90305e-06	5.60559e-05
ENSMUSG00000042042	78752	Csgalnact2	-0.363467	0.00216588	0.0209726	#N/A	#N/A	#N/A
ENSMUSG00000070873	232801	Lilra5	-0.687404	0.00216528	0.0209726	0.951773	0.00331239	0.0117737
ENSMUSG00000039414	320473	Heatr5b	0.329731	0.00216572	0.0209726	#N/A	#N/A	#N/A
ENSMUSG00000030727	70314	Rabep2	0.504953	0.00217521	0.0210492	#N/A	#N/A	#N/A
ENSMUSG00000042363	216551	1110067D22Rik	-0.405201	0.00218091	0.0210907	#N/A	#N/A	#N/A
ENSMUSG00000037493	56506	Cib2	0.688372	0.00218578	0.021124	-0.86717	0.00730565	0.0232333
ENSMUSG00000031666	19651	Rbl2	0.378967	0.00219136	0.0211641	#N/A	#N/A	#N/A
ENSMUSG00000020019	57764	Ntn4	-0.43223	0.00219593	0.0211945	#N/A	#N/A	#N/A
ENSMUSG00000022957	16443	Itsn1	0.312527	0.00220073	0.021227	#N/A	#N/A	#N/A
ENSMUSG00000030428	57776	Ttyh1	-0.711813	0.0022071	0.0212608	#N/A	#N/A	#N/A
ENSMUSG00000020782	217325	Llgl2	0.562722	0.00220635	0.0212608	#N/A	#N/A	#N/A
ENSMUSG00000061894	269585	Zscan20	0.479789	0.0022092	0.0212673	#N/A	#N/A	#N/A
ENSMUSG00000009378	240638	Slc16a12	-0.531248	0.00221906	0.0213484	-1.17345	3.7163e-11	7.30133e-10
ENSMUSG00000028479	50798	Gne	0.328627	0.00222154	0.0213584	#N/A	#N/A	#N/A
ENSMUSG00000063488	382118	Zfp167	0.500984	0.00222359	0.0213643	-0.76747	9.1322e-05	0.00050105
ENSMUSG00000015714	76893	Lass2	-0.342664	0.00224328	0.0215395	#N/A	#N/A	#N/A
ENSMUSG00000029578	74781	Wipi2	0.301861	0.00224826	0.0215734	#N/A	#N/A	#N/A
ENSMUSG00000025255	80892	Zfhx4	0.610484	0.00225512	0.0216252	-0.756944	0.0018202	0.00701437
ENSMUSG00000058318	192285	Phf21a	0.365938	0.00226376	0.0216775	#N/A	#N/A	#N/A
ENSMUSG00000026628	11910	Atf3	-0.857343	0.00226572	0.0216775	2.25272	1.28893e-08	1.63534e-07
ENSMUSG00000020652	52504	Cenpo	0.562544	0.00226535	0.0216775	#N/A	#N/A	#N/A
ENSMUSG00000036655	71693	Colec11	-0.528812	0.0022664	0.0216775	#N/A	#N/A	#N/A
ENSMUSG00000069515	17110	Lyz1	-0.758007	0.00227347	0.0217311	#N/A	#N/A	#N/A
ENSMUSG00000024287	225160	Thoc1	-0.418517	0.00227535	0.0217351	#N/A	#N/A	#N/A
ENSMUSG00000038217	380712	Tlcd2	-0.568129	0.00228279	0.0217922	0.759496	7.45747e-06	5.32783e-05
ENSMUSG00000037465	21847	Klf10	-0.50778	0.00228718	0.02182	#N/A	#N/A	#N/A
ENSMUSG00000030302	11941	Atp2b2	0.647384	0.00229056	0.0218383	-1.06758	0.0165663	0.0459411
ENSMUSG00000001508	20391	Sgca	0.363135	0.00229615	0.0218718	#N/A	#N/A	#N/A
ENSMUSG00000021427	107513	Ssr1	-0.333011	0.00229703	0.0218718	#N/A	#N/A	#N/A
ENSMUSG00000042903	54601	Foxo4	0.43714	0.00230677	0.0219505	-0.649625	2.97242e-06	2.32553e-05
ENSMUSG00000004451	64143	Ralb	-0.392673	0.0023108	0.0219607	0.617906	6.57777e-10	1.05151e-08
ENSMUSG00000037703	241638	Prosapip1	0.440281	0.00230991	0.0219607	#N/A	#N/A	#N/A
ENSMUSG00000042826	14166	Fgf11	0.67755	0.00231367	0.0219739	#N/A	#N/A	#N/A
ENSMUSG00000045087	94226	S1pr5	0.858599	0.00232779	0.0220939	#N/A	#N/A	#N/A
ENSMUSG00000043029	246788	Trpv3	0.864242	0.00232993	0.0221002	#N/A	#N/A	#N/A
ENSMUSG00000017776	12928	Crk	-0.321829	0.00233329	0.0221179	#N/A	#N/A	#N/A
ENSMUSG00000062785	16504	Kcnc3	0.818721	0.00233634	0.0221326	#N/A	#N/A	#N/A
ENSMUSG00000038068	218215	Rnf144b	-0.41189	0.00234041	0.022157	#N/A	#N/A	#N/A
ENSMUSG00000041308	20650	Sntb2	-0.426444	0.00234224	0.0221603	#N/A	#N/A	#N/A
ENSMUSG00000060373	15381	Hnrnpc	-0.388495	0.00236067	0.0223205	#N/A	#N/A	#N/A
ENSMUSG00000025283	20229	Sat1	-0.531688	0.00236683	0.0223502	0.631491	3.05651e-07	2.94934e-06
ENSMUSG00000001946	69524	Esam	-0.447719	0.00236623	0.0223502	#N/A	#N/A	#N/A
ENSMUSG00000059901	237360	Adamts14	-0.814483	0.00236939	0.0223601	#N/A	#N/A	#N/A
ENSMUSG00000031833	546071	Mast3	0.47155	0.00237174	0.0223681	#N/A	#N/A	#N/A
ENSMUSG00000023036	93708	Pcdhga9	0.73375	0.00238583	0.0224725	-0.768724	6.22492e-06	4.52087e-05
ENSMUSG00000066306	101706	Numa1	0.331256	0.00240077	0.022556	#N/A	#N/A	#N/A
ENSMUSG00000049553	20019	Polr1a	0.282171	0.00239981	0.022556	#N/A	#N/A	#N/A
ENSMUSG00000029438	77045	Bcl7a	0.454097	0.00240673	0.0225977	#N/A	#N/A	#N/A
ENSMUSG00000028836	230810	Slc30a2	0.763937	0.00241468	0.02265	#N/A	#N/A	#N/A
ENSMUSG00000049439	77951	Cyp20a1	-0.486704	0.00241535	0.02265	#N/A	#N/A	#N/A
ENSMUSG00000034349	70099	Smc4	-0.481666	0.0024215	0.0226665	#N/A	#N/A	#N/A
ENSMUSG00000071722	270624	Spin4	-0.613468	0.00242424	0.0226665	0.863184	2.65717e-07	2.59732e-06
ENSMUSG00000045377	67020	Tmem88	-0.553253	0.00242473	0.0226665	#N/A	#N/A	#N/A
ENSMUSG00000039831	214137	Arhgap29	-0.422352	0.0024209	0.0226665	#N/A	#N/A	#N/A
ENSMUSG00000020898	68964	1500010J02Rik	0.346835	0.00242312	0.0226665	#N/A	#N/A	#N/A
ENSMUSG00000023191	14789	Leprel2	-0.445864	0.00243545	0.0227523	1.00327	1.42456e-13	4.00398e-12
ENSMUSG00000020993	78232	Trappc6b	-0.365066	0.00245443	0.0229152	#N/A	#N/A	#N/A
ENSMUSG00000027624	13821	Epb4.1l1	0.350437	0.00246286	0.0229362	#N/A	#N/A	#N/A
ENSMUSG00000006369	14114	Fbln1	-0.405534	0.00246062	0.0229362	-0.843553	2.79312e-13	7.42763e-12
ENSMUSG00000058248	16510	Kcnh1	-0.629834	0.00246199	0.0229362	#N/A	#N/A	#N/A
ENSMUSG00000024642	21888	Tle4	-0.461814	0.00246096	0.0229362	#N/A	#N/A	#N/A
ENSMUSG00000023068	52014	Nus1	-0.500693	0.00247546	0.0230392	#N/A	#N/A	#N/A
ENSMUSG00000029778	11517	Adcyap1r1	0.433586	0.00247935	0.0230609	0.70697	0.000195506	0.000996841
ENSMUSG00000028266	16911	Lmo4	-0.354938	0.00248804	0.0231272	1.07456	2.09315e-13	5.69077e-12
ENSMUSG00000044258	13024	Ctla2a	-0.847354	0.00249532	0.0231801	0.743756	1.95323e-07	1.9478e-06
ENSMUSG00000022507	69053	1810013L24Rik	-0.386221	0.00249684	0.0231801	#N/A	#N/A	#N/A
ENSMUSG00000040591	228356	1110051M20Rik	0.378017	0.00251064	0.0232412	#N/A	#N/A	#N/A
ENSMUSG00000051242	93880	Pcdhb9	-0.841679	0.00250659	0.0232412	#N/A	#N/A	#N/A
ENSMUSG00000039458	268783	Mtmr12	-0.376047	0.0025093	0.0232412	#N/A	#N/A	#N/A
ENSMUSG00000038797	22691	Zscan2	0.557535	0.00250887	0.0232412	#N/A	#N/A	#N/A
ENSMUSG00000035759	71769	Bbs10	0.595625	0.00251285	0.0232415	-1.11308	8.33618e-08	9.01289e-07
ENSMUSG00000031934	55991	Panx1	-0.622464	0.00252148	0.0232923	1.0533	2.75372e-06	2.1673e-05
ENSMUSG00000020689	16416	Itgb3	-0.672035	0.00252126	0.0232923	#N/A	#N/A	#N/A
ENSMUSG00000030259	71323	Rassf8	0.365573	0.00252633	0.0233081	#N/A	#N/A	#N/A
ENSMUSG00000043505	317757	Gimap5	-0.706853	0.0025252	0.0233081	#N/A	#N/A	#N/A
ENSMUSG00000032562	14678	Gnai2	-0.35323	0.00254535	0.0234545	0.604526	1.02967e-06	8.88778e-06
ENSMUSG00000040550	72201	Otud6b	-0.351484	0.0025607	0.0235666	#N/A	#N/A	#N/A
ENSMUSG00000025145	217366	Lrrc45	0.418245	0.00256677	0.0236064	#N/A	#N/A	#N/A
ENSMUSG00000036594	14960	H2-Aa	-0.534454	0.0025682	0.0236064	1.00546	0.000160237	0.000833424
ENSMUSG00000085795	353310	Zfp703	0.637023	0.00257453	0.02365	#N/A	#N/A	#N/A
ENSMUSG00000021108	18755	Prkch	-0.443277	0.00257937	0.0236798	#N/A	#N/A	#N/A
ENSMUSG00000006920	14055	Ezh1	0.312574	0.00258697	0.0237349	#N/A	#N/A	#N/A
ENSMUSG00000001441	19155	Npepps	0.437281	0.00258896	0.0237385	#N/A	#N/A	#N/A
ENSMUSG00000028854	20544	Slc9a1	0.448471	0.00259339	0.0237592	#N/A	#N/A	#N/A
ENSMUSG00000056216	12611	Cebpg	-0.401951	0.00259442	0.0237592	#N/A	#N/A	#N/A
ENSMUSG00000001506	12842	Col1a1	-0.783429	0.00261021	0.0238892	1.73176	6.90291e-19	4.17771e-17
ENSMUSG00000019852	215821	D10Bwg1379e	-0.540541	0.00261833	0.023934	-0.988738	1.16787e-06	9.99335e-06
ENSMUSG00000003476	12922	Crhr2	0.38216	0.00261724	0.023934	#N/A	#N/A	#N/A
ENSMUSG00000062210	106869	Tnfaip8	-0.438347	0.0026205	0.023939	0.73694	1.75922e-08	2.16423e-07
ENSMUSG00000031239	16431	Itm2a	-0.636064	0.00262605	0.023975	#N/A	#N/A	#N/A
ENSMUSG00000028035	67035	Dnajb4	-0.46	0.00263729	0.0240587	#N/A	#N/A	#N/A
ENSMUSG00000032633	216805	Flcn	0.297637	0.00263846	0.0240587	-0.784591	3.64123e-09	5.10353e-08
ENSMUSG00000071379	53602	Hpcal1	-0.513634	0.00264271	0.0240827	#N/A	#N/A	#N/A
ENSMUSG00000026712	17533	Mrc1	-0.381305	0.00264544	0.0240928	#N/A	#N/A	#N/A
ENSMUSG00000025738	214931	Fbxl16	0.540225	0.0026621	0.0242297	#N/A	#N/A	#N/A
ENSMUSG00000030110	19713	Ret	-0.632838	0.00267192	0.0243042	-1.25641	5.96553e-05	0.000347077
ENSMUSG00000055553	75620	2810422J05Rik	0.351956	0.0026811	0.0243429	#N/A	#N/A	#N/A
ENSMUSG00000039270	230316	Megf9	-0.525043	0.00268077	0.0243429	0.586227	4.85198e-05	0.000289652
ENSMUSG00000027803	97064	Wwtr1	-0.325653	0.00268023	0.0243429	#N/A	#N/A	#N/A
ENSMUSG00000022179	74359	4931414P19Rik	0.597904	0.00268458	0.0243596	#N/A	#N/A	#N/A
ENSMUSG00000039842	244329	Mcph1	0.443176	0.00269359	0.0244265	#N/A	#N/A	#N/A
ENSMUSG00000033446	67168	Lpar6	-0.460946	0.00270076	0.0244765	#N/A	#N/A	#N/A
ENSMUSG00000028803	74552	Nipal3	0.324902	0.00270443	0.0244949	#N/A	#N/A	#N/A
ENSMUSG00000028017	13645	Egf	0.329837	0.00271393	0.0245659	-1.3542	2.39233e-09	3.47967e-08
ENSMUSG00000020734	14813	Grin2c	-0.46345	0.00274099	0.0247957	-1.5173	1.40701e-15	5.2917e-14
ENSMUSG00000070639	433926	Lrrc8b	-0.543195	0.00274265	0.0247957	#N/A	#N/A	#N/A
ENSMUSG00000026484	19821	Rnf2	-0.41061	0.00275416	0.0248695	#N/A	#N/A	#N/A
ENSMUSG00000030000	11519	Add2	-0.768781	0.00275268	0.0248695	#N/A	#N/A	#N/A
ENSMUSG00000056313	69068	1810011O10Rik	-0.535304	0.00276126	0.0249185	#N/A	#N/A	#N/A
ENSMUSG00000004843	68942	Chmp2b	-0.397287	0.00276427	0.0249305	#N/A	#N/A	#N/A
ENSMUSG00000023008	22379	Fmnl3	-0.395766	0.00276768	0.024946	#N/A	#N/A	#N/A
ENSMUSG00000000957	17387	Mmp14	-0.517227	0.0027748	0.0249951	0.824109	8.07841e-07	7.10109e-06
ENSMUSG00000051747	22138	Ttn	0.362889	0.00277869	0.0249998	-1.67175	7.06705e-27	1.04328e-24
ENSMUSG00000032349	68801	Elovl5	-0.367526	0.00278734	0.0250624	#N/A	#N/A	#N/A
ENSMUSG00000047126	67300	Cltc	-0.37271	0.00278913	0.0250634	#N/A	#N/A	#N/A
ENSMUSG00000001542	192657	Ell2	-0.566681	0.00279765	0.0251013	1.01551	7.58501e-09	9.93473e-08
ENSMUSG00000079477	19349	Rab7	-0.404172	0.00279842	0.0251013	#N/A	#N/A	#N/A
ENSMUSG00000079614	72124	Seh1l	-0.334254	0.00280574	0.0251518	#N/A	#N/A	#N/A
ENSMUSG00000027006	66861	Dnajc10	-0.313371	0.00280821	0.0251587	#N/A	#N/A	#N/A
ENSMUSG00000037259	241688	6330439K17Rik	0.665992	0.00282792	0.0253184	#N/A	#N/A	#N/A
ENSMUSG00000046387	93888	Pcdhb17	-0.565626	0.00282944	0.0253184	#N/A	#N/A	#N/A
ENSMUSG00000019899	16773	Lama2	-0.329499	0.00283528	0.0253554	#N/A	#N/A	#N/A
ENSMUSG00000067889	20743	Spnb3	0.722431	0.00284186	0.025399	#N/A	#N/A	#N/A
ENSMUSG00000005672	16590	Kit	-0.617444	0.00284364	0.0253995	#N/A	#N/A	#N/A
ENSMUSG00000037251	74653	4930444A02Rik	0.420338	0.0028603	0.025533	#N/A	#N/A	#N/A
ENSMUSG00000029638	170772	Glcci1	0.472204	0.00286561	0.025565	#N/A	#N/A	#N/A
ENSMUSG00000015165	15388	Hnrnpl	-0.359515	0.00288153	0.0256917	#N/A	#N/A	#N/A
ENSMUSG00000020743	69674	Mif4gd	0.364154	0.0028873	0.0257277	#N/A	#N/A	#N/A
ENSMUSG00000027956	70652	Tmem144	-0.417956	0.00289608	0.0257904	#N/A	#N/A	#N/A
ENSMUSG00000051977	213389	Prdm9	0.634578	0.00290724	0.0258743	#N/A	#N/A	#N/A
ENSMUSG00000072647	280668	Adam1a	0.593377	0.00291123	0.0258943	-1.25289	2.47684e-08	2.96171e-07
ENSMUSG00000051984	240667	Sec31b	0.403435	0.0029153	0.0259149	-1.3496	7.04728e-18	3.79928e-16
ENSMUSG00000066687	235320	Zbtb16	-0.575547	0.00291927	0.0259347	#N/A	#N/A	#N/A
ENSMUSG00000015176	70769	Nolc1	-0.339841	0.00292274	0.02595	#N/A	#N/A	#N/A
ENSMUSG00000027424	74528	8430406I07Rik	0.391043	0.00292779	0.0259794	#N/A	#N/A	#N/A
ENSMUSG00000026923	18128	Notch1	-0.473334	0.00293642	0.0260274	#N/A	#N/A	#N/A
ENSMUSG00000049090	225791	Zadh2	0.378066	0.00293672	0.0260274	-0.858742	0.000280121	0.00137501
ENSMUSG00000005220	53419	Corin	0.359337	0.00294194	0.0260582	#N/A	#N/A	#N/A
ENSMUSG00000034157	217732	2310044G17Rik	-0.339496	0.00294987	0.0260943	#N/A	#N/A	#N/A
ENSMUSG00000039988	433667	Ankrd13c	-0.418652	0.00295129	0.0260943	#N/A	#N/A	#N/A
ENSMUSG00000020368	12330	Canx	-0.29198	0.00294916	0.0260943	#N/A	#N/A	#N/A
ENSMUSG00000035799	22160	Twist1	-0.685198	0.00295619	0.0261221	#N/A	#N/A	#N/A
ENSMUSG00000036555	74239	Iqce	0.424744	0.00295994	0.0261397	#N/A	#N/A	#N/A
ENSMUSG00000025027	170750	Xpnpep1	-0.395242	0.00296256	0.0261473	0.651746	4.15954e-11	8.10162e-10
ENSMUSG00000070577	230909	Gm572	0.514303	0.00299203	0.026376	-1.35853	9.59702e-06	6.6723e-05
ENSMUSG00000024197	66905	Plin3	0.380838	0.00299579	0.0263935	#N/A	#N/A	#N/A
ENSMUSG00000025995	73674	Wdr75	-0.470701	0.00300826	0.0264407	#N/A	#N/A	#N/A
ENSMUSG00000051351	22704	Zfp46	0.318157	0.00300591	0.0264407	#N/A	#N/A	#N/A
ENSMUSG00000023224	12258	Serping1	-0.367663	0.00300689	0.0264407	#N/A	#N/A	#N/A
ENSMUSG00000039410	70673	Prdm16	0.615922	0.00300776	0.0264407	#N/A	#N/A	#N/A
ENSMUSG00000009114	76964	2610028H24Rik	0.748504	0.00301308	0.0264673	#N/A	#N/A	#N/A
ENSMUSG00000037999	212285	Arap2	0.377746	0.00301486	0.0264673	-1.41856	2.17554e-15	8.04798e-14
ENSMUSG00000049470	93736	Aff4	-0.368366	0.00302274	0.0265209	#N/A	#N/A	#N/A
ENSMUSG00000037129	214531	Tmprss13	0.737243	0.00302967	0.0265503	#N/A	#N/A	#N/A
ENSMUSG00000032002	76863	Dcun1d5	-0.367306	0.00302964	0.0265503	#N/A	#N/A	#N/A
ENSMUSG00000038644	18971	Pold1	0.525578	0.0030612	0.0267792	#N/A	#N/A	#N/A
ENSMUSG00000040163	73344	1700034J05Rik	0.749948	0.00306006	0.0267792	-0.838352	0.00241709	0.00898573
ENSMUSG00000039917	215160	Rhbdd2	0.373682	0.00306111	0.0267792	#N/A	#N/A	#N/A
ENSMUSG00000038437	246198	Mllt6	0.333852	0.00306586	0.0267884	#N/A	#N/A	#N/A
ENSMUSG00000040618	74551	Pck2	0.525368	0.00306564	0.0267884	0.631831	5.73988e-05	0.000335804
ENSMUSG00000029994	11746	Anxa4	-0.394088	0.00307338	0.0268383	0.682008	1.24684e-09	1.89924e-08
ENSMUSG00000028034	51886	Fubp1	-0.373011	0.00310088	0.027052	#N/A	#N/A	#N/A
ENSMUSG00000029059	66469	2810405K02Rik	0.477785	0.00310149	0.027052	0.729202	0.000623524	0.00276896
ENSMUSG00000040724	16490	Kcna2	0.575036	0.00311295	0.0271201	-1.46373	1.10709e-07	1.16351e-06
ENSMUSG00000031284	18481	Pak3	-0.624204	0.0031119	0.0271201	0.687862	0.00558441	0.0184311
ENSMUSG00000020017	15109	Hal	0.713905	0.00311722	0.0271414	#N/A	#N/A	#N/A
ENSMUSG00000029524	75387	Sirt4	0.473136	0.00311947	0.0271451	#N/A	#N/A	#N/A
ENSMUSG00000048814	381338	Lonrf2	0.5842	0.00312366	0.0271656	-0.795874	0.000329312	0.00158931
ENSMUSG00000035561	72535	Aldh1b1	0.369052	0.00313111	0.0271985	-0.92159	4.66436e-16	1.90383e-14
ENSMUSG00000021702	21828	Thbs4	-0.736167	0.00312978	0.0271985	1.53612	0.000617033	0.00274322
ENSMUSG00000020752	170472	Recql5	0.424386	0.00313393	0.0272071	#N/A	#N/A	#N/A
ENSMUSG00000030718	72590	Ppme1	-0.315112	0.00314552	0.027278	#N/A	#N/A	#N/A
ENSMUSG00000028211	60599	Trp53inp1	-0.432071	0.00314577	0.027278	#N/A	#N/A	#N/A
ENSMUSG00000068882	20823	Ssb	-0.367216	0.00315096	0.0273071	#N/A	#N/A	#N/A
ENSMUSG00000042632	53357	Pla2g6	0.491117	0.00315348	0.027313	#N/A	#N/A	#N/A
ENSMUSG00000001802	435965	Lrp3	-0.463746	0.00316055	0.0273424	#N/A	#N/A	#N/A
ENSMUSG00000056481	70445	Cd248	-0.51247	0.00315954	0.0273424	#N/A	#N/A	#N/A
ENSMUSG00000022757	21787	Tfg	-0.405613	0.00317325	0.0274203	#N/A	#N/A	#N/A
ENSMUSG00000029152	68095	Ociad1	-0.309768	0.00317276	0.0274203	#N/A	#N/A	#N/A
ENSMUSG00000003746	17155	Man1a	-0.350998	0.00318607	0.027515	#N/A	#N/A	#N/A
ENSMUSG00000061143	433586	Maml3	0.417525	0.00319673	0.0275631	#N/A	#N/A	#N/A
ENSMUSG00000002948	26400	Map2k7	0.327199	0.0031972	0.0275631	#N/A	#N/A	#N/A
ENSMUSG00000042790	235315	Rnf214	0.340028	0.00320904	0.0276491	#N/A	#N/A	#N/A
ENSMUSG00000060814	100503386	Gm4980	0.596568	0.0032118	0.0276568	#N/A	#N/A	#N/A
ENSMUSG00000044938	244923	Klhl31	-0.307821	0.00321844	0.027698	#N/A	#N/A	#N/A
ENSMUSG00000035064	13631	Eef2k	0.346355	0.00322914	0.027774	#N/A	#N/A	#N/A
ENSMUSG00000029123	64293	Stk32b	0.752302	0.00326042	0.0280268	#N/A	#N/A	#N/A
ENSMUSG00000007877	21393	Tcap	0.480231	0.0032812	0.028163	#N/A	#N/A	#N/A
ENSMUSG00000030083	80283	Abtb1	0.514981	0.00328196	0.028163	#N/A	#N/A	#N/A
ENSMUSG00000035595	69770	1600002K03Rik	0.68359	0.00328487	0.0281717	#N/A	#N/A	#N/A
ENSMUSG00000020706	56095	Ftsj3	-0.32098	0.00328867	0.028188	#N/A	#N/A	#N/A
ENSMUSG00000002908	84036	Kcnn1	0.476842	0.00330998	0.028338	#N/A	#N/A	#N/A
ENSMUSG00000078853	16145	Igtp	0.456501	0.00330892	0.028338	#N/A	#N/A	#N/A
ENSMUSG00000049047	71703	Armcx3	-0.514057	0.00331889	0.0283979	#N/A	#N/A	#N/A
ENSMUSG00000038520	233204	Tbc1d17	0.417725	0.00332183	0.0284067	#N/A	#N/A	#N/A
ENSMUSG00000016308	22209	Ube2a	-0.361491	0.0033293	0.0284542	#N/A	#N/A	#N/A
ENSMUSG00000035189	320091	Ano4	0.37481	0.00334611	0.0285815	-0.616654	0.000146544	0.000769552
ENSMUSG00000021906	218885	Oxnad1	-0.325703	0.00336444	0.0287215	#N/A	#N/A	#N/A
ENSMUSG00000034247	353047	Plekhm1	0.388378	0.00338238	0.0288581	#N/A	#N/A	#N/A
ENSMUSG00000033082	243653	Clec1a	-0.46757	0.00339972	0.0289893	#N/A	#N/A	#N/A
ENSMUSG00000015053	14461	Gata2	-0.505503	0.00340402	0.0290093	#N/A	#N/A	#N/A
ENSMUSG00000022253	68646	1110020G09Rik	0.355715	0.0034143	0.0290802	-0.626587	8.35981e-08	9.03225e-07
ENSMUSG00000075284	215280	Wipf1	-0.465292	0.00341832	0.0290812	#N/A	#N/A	#N/A
ENSMUSG00000000693	16950	Loxl3	-0.515185	0.00341685	0.0290812	1.0402	7.51903e-08	8.20239e-07
ENSMUSG00000072235	22142	Tuba1a	-0.832859	0.00342928	0.0291577	1.05088	2.528e-10	4.35467e-09
ENSMUSG00000027799	26422	Nbea	0.322889	0.00343537	0.0291928	#N/A	#N/A	#N/A
ENSMUSG00000019846	16775	Lama4	-0.278525	0.00344446	0.0292366	#N/A	#N/A	#N/A
ENSMUSG00000050511	18386	Oprd1	0.783171	0.00345304	0.0292927	#N/A	#N/A	#N/A
ENSMUSG00000036371	66870	Serbp1	-0.269717	0.00345876	0.0293244	#N/A	#N/A	#N/A
ENSMUSG00000001419	17261	Mef2d	0.400422	0.00346587	0.029368	#N/A	#N/A	#N/A
ENSMUSG00000041697	12861	Cox6a1	-0.360157	0.00347659	0.0294204	#N/A	#N/A	#N/A
ENSMUSG00000031824	234797	6430548M08Rik	0.468369	0.003478	0.0294204	#N/A	#N/A	#N/A
ENSMUSG00000012422	66074	Tmem167	-0.40832	0.00347506	0.0294204	#N/A	#N/A	#N/A
ENSMUSG00000010830	105785	Kdelr3	-0.410506	0.00348915	0.0294909	0.645746	6.53526e-05	0.000375658
ENSMUSG00000030748	16190	Il4ra	-0.539651	0.0034903	0.0294909	0.956791	1.96842e-06	1.59452e-05
ENSMUSG00000020553	18559	Pctp	0.591441	0.00349649	0.0295264	#N/A	#N/A	#N/A
ENSMUSG00000030189	56449	Csda	-0.31226	0.00350989	0.0296227	#N/A	#N/A	#N/A
ENSMUSG00000006307	75410	Wbp7	0.373396	0.00354253	0.0298812	#N/A	#N/A	#N/A
ENSMUSG00000006732	17299	Mettl1	-0.45099	0.00354499	0.0298849	#N/A	#N/A	#N/A
ENSMUSG00000030337	22317	Vamp1	0.501647	0.00356618	0.0300338	-0.628065	0.000385761	0.00182713
ENSMUSG00000024921	67155	Smarca2	0.287921	0.00356669	0.0300338	-0.660251	5.73479e-11	1.09272e-09
ENSMUSG00000024286	67974	Ccny	-0.324975	0.00358022	0.0301306	#N/A	#N/A	#N/A
ENSMUSG00000022215	68680	Fitm1	0.454941	0.00358284	0.0301356	-1.38349	9.09833e-13	2.24558e-11
ENSMUSG00000047789	268706	Slc38a9	0.367791	0.00359531	0.0302234	#N/A	#N/A	#N/A
ENSMUSG00000040701	11766	Ap1g2	0.597552	0.00359742	0.0302241	#N/A	#N/A	#N/A
ENSMUSG00000022546	76282	Gpt	0.45452	0.00360696	0.030287	#N/A	#N/A	#N/A
ENSMUSG00000027087	16410	Itgav	-0.317739	0.00360972	0.0302931	#N/A	#N/A	#N/A
ENSMUSG00000004631	20392	Sgce	-0.433353	0.00361177	0.0302932	#N/A	#N/A	#N/A
ENSMUSG00000024750	22682	Zfand5	-0.392541	0.00361956	0.0303414	#N/A	#N/A	#N/A
ENSMUSG00000050592	241303	Fam78a	0.607633	0.00362475	0.0303507	1.13576	6.2477e-09	8.34224e-08
ENSMUSG00000031385	140571	Plxnb3	0.417966	0.0036235	0.0303507	-1.25104	1.23762e-10	2.23596e-09
ENSMUSG00000041189	11443	Chrnb1	-0.516407	0.00362687	0.0303512	#N/A	#N/A	#N/A
ENSMUSG00000055254	18212	Ntrk2	-0.732719	0.00363863	0.0304325	#N/A	#N/A	#N/A
ENSMUSG00000061079	20841	Zfp143	-0.390236	0.00364518	0.0304702	#N/A	#N/A	#N/A
ENSMUSG00000021258	12454	Ccnk	0.410347	0.00366425	0.0305951	#N/A	#N/A	#N/A
ENSMUSG00000021737	66413	Psmd6	-0.310976	0.00366284	0.0305951	#N/A	#N/A	#N/A
ENSMUSG00000045625	239827	Pigz	0.596803	0.00369022	0.0307774	#N/A	#N/A	#N/A
ENSMUSG00000012609	320244	Ttll5	0.331036	0.00370892	0.0308884	#N/A	#N/A	#N/A
ENSMUSG00000055053	18029	Nfic	0.449128	0.00370685	0.0308884	#N/A	#N/A	#N/A
ENSMUSG00000049265	16527	Kcnk3	0.468375	0.00370976	0.0308884	-1.13656	2.52253e-10	4.34999e-09
ENSMUSG00000030218	17313	Mgp	-0.732072	0.00372526	0.031	#N/A	#N/A	#N/A
ENSMUSG00000046096	233812	BC030336	-0.461921	0.00372966	0.0310192	#N/A	#N/A	#N/A
ENSMUSG00000037622	230796	Wdtc1	0.397947	0.00373233	0.0310241	#N/A	#N/A	#N/A
ENSMUSG00000017453	19193	Pipox	0.824862	0.00374146	0.0310826	#N/A	#N/A	#N/A
ENSMUSG00000038168	210530	Leprel1	-0.542978	0.00374899	0.0311277	0.604682	0.0074129	0.0234991
ENSMUSG00000026435	212980	Slc45a3	-0.809986	0.00376451	0.0312217	#N/A	#N/A	#N/A
ENSMUSG00000032777	233863	Gtf3c1	0.304246	0.00376258	0.0312217	#N/A	#N/A	#N/A
ENSMUSG00000004360	212448	9330159F19Rik	-0.652042	0.00376998	0.0312496	-1.22656	0.00209657	0.00793042
ENSMUSG00000059325	74318	Hopx	-0.473319	0.00378649	0.0313689	-2.03893	5.52694e-24	5.7817e-22
ENSMUSG00000067071	55927	Hes6	0.514928	0.00379057	0.0313696	#N/A	#N/A	#N/A
ENSMUSG00000038831	241308	Ralgps1	0.539607	0.00379079	0.0313696	#N/A	#N/A	#N/A
ENSMUSG00000031340	14404	Gabre	0.822661	0.00380294	0.0314526	#N/A	#N/A	#N/A
ENSMUSG00000047497	239337	Adamts12	-0.506848	0.00381713	0.0315524	#N/A	#N/A	#N/A
ENSMUSG00000032182	74766	Yipf2	0.479129	0.00382201	0.0315751	#N/A	#N/A	#N/A
ENSMUSG00000061244	105504	Exoc5	-0.410566	0.00383916	0.0316992	#N/A	#N/A	#N/A
ENSMUSG00000030747	67800	Dgat2	0.496866	0.00384462	0.0317267	#N/A	#N/A	#N/A
ENSMUSG00000022415	20972	Syngr1	0.357196	0.00385365	0.0317835	-0.634063	2.0793e-07	2.06441e-06
ENSMUSG00000027412	64899	Lpin3	-0.4821	0.00388302	0.032008	#N/A	#N/A	#N/A
ENSMUSG00000024325	19763	Ring1	0.503363	0.00389353	0.0320768	#N/A	#N/A	#N/A
ENSMUSG00000044340	98432	Phlpp1	0.357361	0.00389621	0.0320811	-0.659028	0.000365182	0.00174273
ENSMUSG00000058586	68607	Serhl	0.381144	0.00390212	0.032112	0.62665	0.000301716	0.00146734
ENSMUSG00000005204	80886	Senp3	-0.34921	0.0039234	0.0322394	#N/A	#N/A	#N/A
ENSMUSG00000041859	17215	Mcm3	-0.484595	0.00392411	0.0322394	1.37371	2.98666e-10	5.05651e-09
ENSMUSG00000025658	245684	Cnksr2	-0.677996	0.00392249	0.0322394	#N/A	#N/A	#N/A
ENSMUSG00000037762	66859	Slc16a9	-0.457711	0.00393097	0.0322778	#N/A	#N/A	#N/A
ENSMUSG00000060680	667952	Gm8894	-0.642859	0.00393891	0.0323252	#N/A	#N/A	#N/A
ENSMUSG00000031871	12562	Cdh5	-0.379448	0.00395338	0.0323367	#N/A	#N/A	#N/A
ENSMUSG00000029158	75581	Yipf7	-0.322571	0.00394788	0.0323367	#N/A	#N/A	#N/A
ENSMUSG00000023075	68050	Akirin1	-0.454581	0.00394907	0.0323367	0.600206	8.28799e-05	0.000460813
ENSMUSG00000023827	68262	Agpat4	-0.534073	0.00395304	0.0323367	#N/A	#N/A	#N/A
ENSMUSG00000021061	20741	Spnb1	0.338975	0.00394867	0.0323367	#N/A	#N/A	#N/A
ENSMUSG00000040488	108075	Ltbp4	-0.485261	0.00396644	0.0324257	#N/A	#N/A	#N/A
ENSMUSG00000026944	11305	Abca2	0.402839	0.00397105	0.0324455	#N/A	#N/A	#N/A
ENSMUSG00000013033	330814	Lphn1	0.371968	0.00398492	0.032523	#N/A	#N/A	#N/A
ENSMUSG00000014959	70231	Gorasp2	-0.344134	0.00398311	0.032523	#N/A	#N/A	#N/A
ENSMUSG00000064043	224829	Trerf1	0.550465	0.00399038	0.0325498	#N/A	#N/A	#N/A
ENSMUSG00000048251	58208	Bcl11b	0.709641	0.00400193	0.032626	-1.58144	3.78742e-05	0.000232515
ENSMUSG00000027864	19221	Ptgfrn	-0.282646	0.00402676	0.0328105	#N/A	#N/A	#N/A
ENSMUSG00000020692	217011	Nle1	0.708373	0.0040317	0.0328327	#N/A	#N/A	#N/A
ENSMUSG00000006390	54325	Elovl1	-0.393968	0.00404212	0.0328995	0.861525	5.31318e-11	1.02225e-09
ENSMUSG00000006301	69660	Tmbim1	-0.306601	0.00404633	0.0329158	#N/A	#N/A	#N/A
ENSMUSG00000018820	319740	Zfyve27	0.346749	0.00405699	0.0329664	#N/A	#N/A	#N/A
ENSMUSG00000021180	73086	Rps6ka5	0.338724	0.00406091	0.0329802	-1.14586	4.50047e-14	1.34384e-12
ENSMUSG00000038205	108097	Prkab2	-0.383613	0.004075	0.0330765	#N/A	#N/A	#N/A
ENSMUSG00000047419	76469	Cmya5	0.409169	0.00410763	0.0333232	-3.40994	8.18475e-33	1.77105e-30
ENSMUSG00000056919	382090	4922501C03Rik	0.403992	0.00413157	0.0334895	-1.1597	2.5603e-09	3.70692e-08
ENSMUSG00000027536	66371	Chmp4c	0.404187	0.00413265	0.0334895	#N/A	#N/A	#N/A
ENSMUSG00000075592	277154	Nynrin	0.409819	0.00414316	0.0335564	#N/A	#N/A	#N/A
ENSMUSG00000066571	233103	4931406P16Rik	-0.335947	0.00414682	0.0335678	#N/A	#N/A	#N/A
ENSMUSG00000028634	16656	Hivep3	0.620923	0.00415791	0.0336392	#N/A	#N/A	#N/A
ENSMUSG00000046671	76824	Fam54b	-0.266227	0.00416995	0.0337183	#N/A	#N/A	#N/A
ENSMUSG00000031312	26549	Itgb1bp2	-0.413135	0.00418585	0.0337864	#N/A	#N/A	#N/A
ENSMUSG00000024059	78785	Clip4	0.344563	0.00418748	0.0337864	#N/A	#N/A	#N/A
ENSMUSG00000026674	18214	Ddr2	-0.378973	0.00418657	0.0337864	#N/A	#N/A	#N/A
ENSMUSG00000024785	59028	Rcl1	-0.525327	0.00418736	0.0337864	#N/A	#N/A	#N/A
ENSMUSG00000049687	338368	Fam109b	-0.55435	0.0041962	0.0338321	#N/A	#N/A	#N/A
ENSMUSG00000020067	68802	Mypn	-0.298534	0.00419769	0.0338321	#N/A	#N/A	#N/A
ENSMUSG00000030888	101867	Rrp8	-0.367986	0.00420416	0.0338659	#N/A	#N/A	#N/A
ENSMUSG00000016319	11740	Slc25a5	-0.332445	0.00420844	0.033882	#N/A	#N/A	#N/A
ENSMUSG00000053253	76273	Ndfip2	-0.383025	0.00421294	0.0338996	#N/A	#N/A	#N/A
ENSMUSG00000041598	56699	Cdc42ep4	-0.502112	0.00422079	0.0339079	#N/A	#N/A	#N/A
ENSMUSG00000037845	382137	Fdxacb1	-0.503223	0.00422665	0.0339366	#N/A	#N/A	#N/A
ENSMUSG00000056665	223626	4930572J05Rik	0.518583	0.00424039	0.0340102	#N/A	#N/A	#N/A
ENSMUSG00000020544	69802	Cox11	-0.416205	0.0042386	0.0340102	#N/A	#N/A	#N/A
ENSMUSG00000049792	70369	Bag5	-0.36822	0.00425712	0.0341259	#N/A	#N/A	#N/A
ENSMUSG00000050148	54609	Ubqln2	0.481501	0.00426102	0.0341387	#N/A	#N/A	#N/A
ENSMUSG00000041220	170439	Elovl6	-0.696827	0.00426879	0.0341825	#N/A	#N/A	#N/A
ENSMUSG00000045980	320534	Tmem104	0.461587	0.00427877	0.034244	#N/A	#N/A	#N/A
ENSMUSG00000021253	21809	Tgfb3	-0.394676	0.0042818	0.0342498	#N/A	#N/A	#N/A
ENSMUSG00000021699	238871	Pde4d	0.431218	0.00428565	0.0342621	-0.917364	5.18301e-05	0.000307323
ENSMUSG00000001348	11433	Acp5	-0.666338	0.00429461	0.0342988	0.970304	0.00715362	0.0228465
ENSMUSG00000037580	14528	Gch1	-0.491203	0.00429486	0.0342988	#N/A	#N/A	#N/A
ENSMUSG00000030062	103963	Rpn1	-0.307734	0.00430405	0.0343538	#N/A	#N/A	#N/A
ENSMUSG00000038342	208104	Mlxip	0.395167	0.00431754	0.0344429	#N/A	#N/A	#N/A
ENSMUSG00000025417	117150	Pip4k2c	0.316584	0.00432079	0.0344504	-0.834812	3.95352e-19	2.42053e-17
ENSMUSG00000046567	68281	4930430F08Rik	0.508164	0.00433268	0.0345267	#N/A	#N/A	#N/A
ENSMUSG00000025531	12662	Chm	-0.458485	0.00434852	0.0346325	#N/A	#N/A	#N/A
ENSMUSG00000020902	18208	Ntn1	-0.393062	0.00435063	0.0346325	#N/A	#N/A	#N/A
ENSMUSG00000070720	623230	Tmem200b	-0.689209	0.00435716	0.0346659	#N/A	#N/A	#N/A
ENSMUSG00000045333	94187	Zfp423	-0.527487	0.0043609	0.0346771	#N/A	#N/A	#N/A
ENSMUSG00000055302	67568	Mrfap1	-0.267803	0.00437195	0.0347278	#N/A	#N/A	#N/A
ENSMUSG00000049872	103511	Fam26e	-0.580624	0.00437081	0.0347278	1.34811	1.57216e-11	3.27191e-10
ENSMUSG00000033952	12316	Aspm	-0.760913	0.00439597	0.0348999	2.42831	1.07127e-19	7.05075e-18
ENSMUSG00000036377	320827	C530008M17Rik	0.371947	0.00440446	0.0349487	-1.90648	6.21121e-43	2.65168e-40
ENSMUSG00000071551	432720	Akr1c19	0.786357	0.00441968	0.0350507	#N/A	#N/A	#N/A
ENSMUSG00000022297	14368	Fzd6	-0.376855	0.00442861	0.0351027	#N/A	#N/A	#N/A
ENSMUSG00000021066	73991	Atl1	0.479063	0.00443497	0.0351344	#N/A	#N/A	#N/A
ENSMUSG00000040732	13876	Erg	-0.398646	0.00444995	0.0352155	#N/A	#N/A	#N/A
ENSMUSG00000038740	72543	Fam125b	0.384125	0.00444828	0.0352155	#N/A	#N/A	#N/A
ENSMUSG00000072704	381820	2700089E24Rik	-0.3229	0.00446518	0.0353172	#N/A	#N/A	#N/A
ENSMUSG00000028057	19769	Rit1	0.292609	0.00447082	0.035343	#N/A	#N/A	#N/A
ENSMUSG00000029669	269831	Tspan12	-0.44341	0.00448658	0.0354488	#N/A	#N/A	#N/A
ENSMUSG00000020894	22318	Vamp2	0.351453	0.00449627	0.0355064	#N/A	#N/A	#N/A
ENSMUSG00000031637	67620	Lrp2bp	0.688098	0.00450041	0.0355202	#N/A	#N/A	#N/A
ENSMUSG00000030760	66190	Acer3	-0.440448	0.00451228	0.035595	#N/A	#N/A	#N/A
ENSMUSG00000040102	232539	Klhdc5	-0.372917	0.0045273	0.0356945	#N/A	#N/A	#N/A
ENSMUSG00000021957	21881	Tkt	-0.356528	0.0045307	0.0357024	0.587879	0.000593243	0.00265482
ENSMUSG00000031119	14735	Gpc4	0.462177	0.00453646	0.0357289	#N/A	#N/A	#N/A
ENSMUSG00000019942	12534	Cdk1	-0.795156	0.00453948	0.0357337	3.53516	3.9209e-37	1.16858e-34
ENSMUSG00000020900	77579	Myh10	-0.276388	0.00454253	0.0357387	#N/A	#N/A	#N/A
ENSMUSG00000056310	100929	Tyw1	0.409153	0.00454671	0.0357527	#N/A	#N/A	#N/A
ENSMUSG00000030759	67420	Far1	-0.380007	0.00454945	0.0357553	#N/A	#N/A	#N/A
ENSMUSG00000037075	75841	Rnf139	-0.401937	0.00456532	0.035861	#N/A	#N/A	#N/A
ENSMUSG00000029126	18196	Nsg1	-0.55379	0.00456804	0.0358635	0.643729	0.0011059	0.00454681
ENSMUSG00000031015	20947	Swap70	-0.383193	0.0045794	0.0359336	#N/A	#N/A	#N/A
ENSMUSG00000028862	53608	Map3k6	-0.80763	0.00458755	0.0359786	#N/A	#N/A	#N/A
ENSMUSG00000007833	69748	Aldh16a1	0.439146	0.00459367	0.035991	-0.785313	5.00754e-12	1.11722e-10
ENSMUSG00000004508	14389	Gab2	-0.33135	0.00459398	0.035991	#N/A	#N/A	#N/A
ENSMUSG00000067916	666532	Gm13139	-0.744467	0.00459783	0.0360022	#N/A	#N/A	#N/A
ENSMUSG00000039167	170757	Eltd1	-0.545314	0.00460414	0.0360326	#N/A	#N/A	#N/A
ENSMUSG00000060002	212862	Chpt1	-0.315195	0.00461187	0.0360367	#N/A	#N/A	#N/A
ENSMUSG00000029569	101118	Tmem168	-0.374049	0.00461195	0.0360367	#N/A	#N/A	#N/A
ENSMUSG00000020072	68371	Pbld1	0.802113	0.00461017	0.0360367	#N/A	#N/A	#N/A
ENSMUSG00000002546	99412	Golga2	0.313722	0.00461597	0.0360492	#N/A	#N/A	#N/A
ENSMUSG00000036644	76795	Tbc1d9b	0.316538	0.00462815	0.0361253	#N/A	#N/A	#N/A
ENSMUSG00000021835	12159	Bmp4	-0.461849	0.00463737	0.0361783	2.58709	1.00938e-34	2.65737e-32
ENSMUSG00000029570	16848	Lfng	-0.560021	0.00465021	0.0362594	0.903167	1.88659e-06	1.53691e-05
ENSMUSG00000024538	19038	Ppic	-0.419837	0.00465799	0.036301	1.05166	1.72068e-12	4.11194e-11
ENSMUSG00000009772	74137	Nuak2	-0.585058	0.00466216	0.0363145	1.35098	4.75159e-11	9.22066e-10
ENSMUSG00000022707	74185	Gbe1	-0.271706	0.00466819	0.0363217	#N/A	#N/A	#N/A
ENSMUSG00000019338	78266	Zfp687	0.3788	0.00467042	0.0363217	#N/A	#N/A	#N/A
ENSMUSG00000029029	59002	Wdr8	0.476171	0.00466853	0.0363217	#N/A	#N/A	#N/A
ENSMUSG00000040570	242819	Rundc3b	-0.744333	0.0046745	0.0363344	#N/A	#N/A	#N/A
ENSMUSG00000033306	210126	Lpp	-0.421811	0.00468043	0.0363615	#N/A	#N/A	#N/A
ENSMUSG00000020120	56193	Plek	-0.427405	0.0046932	0.0364225	1.10714	3.50895e-08	4.05171e-07
ENSMUSG00000036533	260409	Cdc42ep3	-0.335937	0.00469312	0.0364225	#N/A	#N/A	#N/A
ENSMUSG00000037426	277854	Depdc5	0.311901	0.00472363	0.0366396	#N/A	#N/A	#N/A
ENSMUSG00000045287	237847	Rtn4rl1	0.505724	0.00474632	0.0367963	#N/A	#N/A	#N/A
ENSMUSG00000042308	233904	Setd1a	0.411923	0.00475291	0.0368282	#N/A	#N/A	#N/A
ENSMUSG00000000085	29871	Scmh1	0.37672	0.00476264	0.0368844	#N/A	#N/A	#N/A
ENSMUSG00000042532	71146	Golga7b	0.770081	0.00476797	0.0368911	-1.83329	3.44425e-06	2.65911e-05
ENSMUSG00000031872	65115	Bean1	-0.73051	0.00476848	0.0368911	#N/A	#N/A	#N/A
ENSMUSG00000030609	68048	Aen	-0.380525	0.00479135	0.0370488	#N/A	#N/A	#N/A
ENSMUSG00000050234	14612	Gja4	-0.634315	0.00481194	0.0371886	0.758588	0.000242158	0.00120552
ENSMUSG00000032085	21345	Tagln	-0.565791	0.0048265	0.0372772	2.83359	4.89834e-33	1.08978e-30
ENSMUSG00000029234	21982	Tmem165	-0.357818	0.00482842	0.0372772	#N/A	#N/A	#N/A
ENSMUSG00000040848	108735	Sft2d2	-0.331933	0.00484607	0.037394	#N/A	#N/A	#N/A
ENSMUSG00000019590	13056	Cyb561	-0.357961	0.00485355	0.0374323	0.700673	1.5475e-07	1.58318e-06
ENSMUSG00000024610	16149	Cd74	-0.495052	0.00486989	0.0375388	#N/A	#N/A	#N/A
ENSMUSG00000062762	13663	Ei24	-0.307731	0.00487966	0.0375947	#N/A	#N/A	#N/A
ENSMUSG00000029007	11610	Agtrap	0.284849	0.00490576	0.0377761	#N/A	#N/A	#N/A
ENSMUSG00000029406	19679	Pitpnm2	0.408713	0.00491147	0.0378005	#N/A	#N/A	#N/A
ENSMUSG00000029676	101185	Pot1a	0.374345	0.0049461	0.0380364	#N/A	#N/A	#N/A
ENSMUSG00000003233	13544	Dvl3	0.548194	0.00494724	0.0380364	#N/A	#N/A	#N/A
ENSMUSG00000079481	100042480	Nhsl2	-0.476264	0.00495544	0.0380797	#N/A	#N/A	#N/A
ENSMUSG00000017781	18738	Pitpna	-0.307942	0.00496628	0.0381433	#N/A	#N/A	#N/A
ENSMUSG00000090958	434215	Lrrc32	-0.431401	0.00498238	0.0382472	#N/A	#N/A	#N/A
ENSMUSG00000023977	224826	Ubr2	0.365047	0.00501979	0.0384945	-0.718295	1.24249e-10	2.24046e-09
ENSMUSG00000037071	20249	Scd1	-0.78756	0.00504334	0.0386552	-0.694532	0.00354597	0.012461
ENSMUSG00000018476	216850	Kdm6b	0.575768	0.00505567	0.0387097	#N/A	#N/A	#N/A
ENSMUSG00000055862	71564	Izumo4	0.592289	0.00505446	0.0387097	#N/A	#N/A	#N/A
ENSMUSG00000022892	11820	App	-0.29635	0.00507264	0.0388197	#N/A	#N/A	#N/A
ENSMUSG00000041202	18782	Pla2g2d	0.548618	0.0050797	0.0388537	-1.41965	0.000231677	0.00115846
ENSMUSG00000033355	67775	Rtp4	-0.634398	0.00509281	0.0389339	1.10188	1.04568e-06	9.0063e-06
ENSMUSG00000020107	52717	Anapc16	-0.31146	0.0050982	0.0389551	#N/A	#N/A	#N/A
ENSMUSG00000018809	319822	Smyd4	0.39003	0.00510496	0.0389699	#N/A	#N/A	#N/A
ENSMUSG00000054676	72244	1600014C10Rik	0.342625	0.00510538	0.0389699	#N/A	#N/A	#N/A
ENSMUSG00000032679	12509	Cd59a	-0.336633	0.00511944	0.0390571	#N/A	#N/A	#N/A
ENSMUSG00000075590	223649	Nrbp2	0.376839	0.00512696	0.0390743	#N/A	#N/A	#N/A
ENSMUSG00000053819	108058	Camk2d	-0.331505	0.00512627	0.0390743	#N/A	#N/A	#N/A
ENSMUSG00000029650	71706	Slc46a3	0.357258	0.00513048	0.0390811	#N/A	#N/A	#N/A
ENSMUSG00000038241	16328	Cep250	0.390576	0.00515435	0.0392227	#N/A	#N/A	#N/A
ENSMUSG00000038446	71713	Cdc40	0.326201	0.00515339	0.0392227	#N/A	#N/A	#N/A
ENSMUSG00000033149	208177	Phldb2	-0.394139	0.00517185	0.0393357	#N/A	#N/A	#N/A
ENSMUSG00000024169	106633	Ift140	0.349422	0.00518971	0.039411	#N/A	#N/A	#N/A
ENSMUSG00000069520	67226	Tmem19	0.331997	0.00518893	0.039411	#N/A	#N/A	#N/A
ENSMUSG00000026970	56878	Rbms1	-0.326955	0.00520393	0.0394988	#N/A	#N/A	#N/A
ENSMUSG00000005802	22785	Slc30a4	-0.47739	0.00521675	0.0395759	#N/A	#N/A	#N/A
ENSMUSG00000058498	433809	Rnf207	0.296424	0.00522093	0.0395874	#N/A	#N/A	#N/A
ENSMUSG00000037235	17122	Mxd4	-0.376042	0.00523866	0.0396922	#N/A	#N/A	#N/A
ENSMUSG00000037443	70012	Ccdc21	0.325962	0.00524009	0.0396922	#N/A	#N/A	#N/A
ENSMUSG00000032062	66952	2310030G06Rik	0.456205	0.00524458	0.0396971	#N/A	#N/A	#N/A
ENSMUSG00000034105	74347	4632415K11Rik	0.403616	0.00525182	0.0397203	#N/A	#N/A	#N/A
ENSMUSG00000034220	14733	Gpc1	0.384566	0.00526801	0.0398022	-1.07374	8.08506e-20	5.37516e-18
ENSMUSG00000001014	78369	Icam4	0.712474	0.00527504	0.039835	-1.11493	0.00158014	0.00619352
ENSMUSG00000022756	224022	Slc7a4	0.555278	0.00527804	0.0398374	#N/A	#N/A	#N/A
ENSMUSG00000067653	78321	Ankrd23	-0.779852	0.00530684	0.0400036	1.36868	6.80637e-06	4.88919e-05
ENSMUSG00000038074	231997	Fkbp14	-0.39204	0.0053054	0.0400036	#N/A	#N/A	#N/A
ENSMUSG00000022451	19230	Twf1	-0.363371	0.00531626	0.0400242	#N/A	#N/A	#N/A
ENSMUSG00000006715	57441	Gmnn	0.563002	0.00531567	0.0400242	0.590537	0.00638064	0.0207049
ENSMUSG00000031357	67043	Syap1	-0.359011	0.00533483	0.0401093	#N/A	#N/A	#N/A
ENSMUSG00000020614	208659	Fam20a	-0.480883	0.00533403	0.0401093	#N/A	#N/A	#N/A
ENSMUSG00000046722	57912	Cdc42se1	-0.349003	0.00533567	0.0401093	0.846075	5.41743e-13	1.38693e-11
ENSMUSG00000030890	16202	Ilk	-0.323935	0.00536647	0.0403204	#N/A	#N/A	#N/A
ENSMUSG00000046245	231805	Pilra	-0.793094	0.00537207	0.0403421	1.31566	0.000214399	0.00108269
ENSMUSG00000057897	12323	Camk2b	0.455289	0.00539337	0.0404816	#N/A	#N/A	#N/A
ENSMUSG00000023328	11423	Ache	0.534172	0.0053985	0.0404997	#N/A	#N/A	#N/A
ENSMUSG00000010067	56289	Rassf1	-0.393262	0.00540527	0.04053	0.705164	3.99563e-06	3.04022e-05
ENSMUSG00000051586	100505050	Mical3	0.361896	0.00542198	0.0405841	#N/A	#N/A	#N/A
ENSMUSG00000022899	57738	Slc15a2	0.378858	0.00542177	0.0405841	#N/A	#N/A	#N/A
ENSMUSG00000019214	214901	Chtf18	0.735466	0.0054162	0.0405841	1.18186	9.41491e-05	0.000514061
ENSMUSG00000024913	16973	Lrp5	-0.400564	0.00542341	0.0405841	#N/A	#N/A	#N/A
ENSMUSG00000005950	94045	P2rx5	-0.402374	0.00543005	0.0406133	#N/A	#N/A	#N/A
ENSMUSG00000003526	19125	Prodh	0.385659	0.00544256	0.0406863	-1.10943	1.88709e-11	3.89146e-10
ENSMUSG00000042918	74490	Mamstr	0.455382	0.00546243	0.0407733	#N/A	#N/A	#N/A
ENSMUSG00000038056	231051	Mll3	0.361014	0.00545747	0.0407733	-0.805832	2.53689e-19	1.5839e-17
ENSMUSG00000029851	232748	Fam115c	-0.542238	0.00546131	0.0407733	0.737996	9.64012e-06	6.69342e-05
ENSMUSG00000012443	16551	Kif11	-0.689634	0.00549091	0.0409037	2.25125	2.78804e-14	8.56808e-13
ENSMUSG00000032725	14276	Folr2	-0.473026	0.00548676	0.0409037	0.677233	0.000384822	0.00182323
ENSMUSG00000053930	380702	Shisa6	0.787407	0.00549065	0.0409037	#N/A	#N/A	#N/A
ENSMUSG00000026883	69601	Dab2ip	-0.41897	0.0055076	0.0410074	#N/A	#N/A	#N/A
ENSMUSG00000036469	72925	March1	-0.581844	0.00551712	0.0410313	0.771423	0.000223758	0.00112456
ENSMUSG00000021557	67269	Agtpbp1	0.31143	0.00551587	0.0410313	-0.767314	1.95792e-08	2.38269e-07
ENSMUSG00000001827	14275	Folr1	-0.753643	0.00551909	0.0410313	#N/A	#N/A	#N/A
ENSMUSG00000007080	18973	Pole	0.619304	0.00552515	0.0410558	1.46377	1.76922e-08	2.17145e-07
ENSMUSG00000032739	378460	Pram1	0.579357	0.00552971	0.0410692	#N/A	#N/A	#N/A
ENSMUSG00000013646	79566	Sh3bp5l	-0.360444	0.00554354	0.0411513	#N/A	#N/A	#N/A
ENSMUSG00000038013	68524	Wipf2	0.462474	0.00555312	0.0412018	#N/A	#N/A	#N/A
ENSMUSG00000025348	16404	Itga7	0.365574	0.00556272	0.0412524	#N/A	#N/A	#N/A
ENSMUSG00000022562	75475	Oplah	0.402096	0.00557551	0.0412649	#N/A	#N/A	#N/A
ENSMUSG00000015354	76477	Pcolce2	-0.439125	0.00557229	0.0412649	#N/A	#N/A	#N/A
ENSMUSG00000002608	52132	Ccdc97	0.423458	0.00556921	0.0412649	#N/A	#N/A	#N/A
ENSMUSG00000030654	54208	Arl6ip1	-0.372645	0.00557504	0.0412649	0.95966	3.5644e-19	2.19079e-17
ENSMUSG00000026466	208263	Tor1aip1	0.33785	0.00558906	0.0413445	#N/A	#N/A	#N/A
ENSMUSG00000046410	52150	Kcnk6	-0.483333	0.00563031	0.041629	#N/A	#N/A	#N/A
ENSMUSG00000037007	56314	Zfp113	0.357282	0.00564492	0.0417162	-0.690816	2.82114e-07	2.74232e-06
ENSMUSG00000055923	231326	Aasdh	0.391885	0.00565161	0.0417449	-0.846913	5.15011e-08	5.76141e-07
ENSMUSG00000030615	66271	Tmem126a	-0.415046	0.00566578	0.0418035	#N/A	#N/A	#N/A
ENSMUSG00000025010	240665	Ccnj	-0.539556	0.00566884	0.0418035	#N/A	#N/A	#N/A
ENSMUSG00000010064	76257	Slc38a3	0.399868	0.0056708	0.0418035	-0.786809	0.000405574	0.00190838
ENSMUSG00000029490	243197	Mfsd7a	0.540956	0.0056642	0.0418035	#N/A	#N/A	#N/A
ENSMUSG00000027787	97112	Nmd3	-0.386059	0.00568229	0.0418674	#N/A	#N/A	#N/A
ENSMUSG00000024118	72016	1600002H07Rik	0.558812	0.00569282	0.0419034	#N/A	#N/A	#N/A
ENSMUSG00000056071	20202	S100a9	0.784911	0.00571974	0.0420599	0.897465	0.0153572	0.0431795
ENSMUSG00000037370	18605	Enpp1	-0.365229	0.00575001	0.0422198	#N/A	#N/A	#N/A
ENSMUSG00000046949	18105	Nqo2	0.305898	0.00574902	0.0422198	#N/A	#N/A	#N/A
ENSMUSG00000021610	218335	Clptm1l	-0.28343	0.00575828	0.0422388	#N/A	#N/A	#N/A
ENSMUSG00000041731	226041	Pgm5	-0.298799	0.00575633	0.0422388	#N/A	#N/A	#N/A
ENSMUSG00000039671	228880	Zmynd8	0.310738	0.0057801	0.0423779	#N/A	#N/A	#N/A
ENSMUSG00000041870	68420	Ankrd13a	-0.285885	0.00578407	0.0423861	#N/A	#N/A	#N/A
ENSMUSG00000038550	229599	Gm129	-0.521849	0.0057916	0.0424024	#N/A	#N/A	#N/A
ENSMUSG00000035403	241324	Crb2	0.388391	0.00579955	0.0424367	#N/A	#N/A	#N/A
ENSMUSG00000028825	19746	Rhd	0.605153	0.00583492	0.0426745	-1.57476	2.40583e-05	0.000154356
ENSMUSG00000022191	14000	Drosha	0.287658	0.00584694	0.0427414	#N/A	#N/A	#N/A
ENSMUSG00000043241	326622	Upf2	0.353554	0.00585049	0.0427463	-1.1899	1.46591e-14	4.72562e-13
ENSMUSG00000022197	68070	Pdzd2	0.374272	0.00586038	0.0427554	-0.87863	2.48856e-06	1.97732e-05
ENSMUSG00000034853	329910	Acot11	0.308867	0.00586588	0.0427648	#N/A	#N/A	#N/A
ENSMUSG00000027684	14013	Mecom	-0.316506	0.00586741	0.0427648	#N/A	#N/A	#N/A
ENSMUSG00000031147	54634	Magix	0.438123	0.00588067	0.0428404	#N/A	#N/A	#N/A
ENSMUSG00000032267	235323	Usp28	-0.314921	0.00588766	0.0428508	#N/A	#N/A	#N/A
ENSMUSG00000002565	20259	Scin	0.553362	0.00588787	0.0428508	-0.8429	1.44147e-05	9.68502e-05
ENSMUSG00000041879	226432	Ipo9	-0.265087	0.00590267	0.0429354	#N/A	#N/A	#N/A
ENSMUSG00000021765	14313	Fst	-0.683624	0.00590529	0.0429354	#N/A	#N/A	#N/A
ENSMUSG00000028601	52430	Echdc2	0.302768	0.00593281	0.0430513	#N/A	#N/A	#N/A
ENSMUSG00000042109	105859	Csdc2	0.431667	0.0059267	0.0430513	-1.23508	9.47115e-10	1.47105e-08
ENSMUSG00000036402	14701	Gng12	-0.427122	0.00592898	0.0430513	#N/A	#N/A	#N/A
ENSMUSG00000048368	27047	Omd	-0.725926	0.00593027	0.0430513	#N/A	#N/A	#N/A
ENSMUSG00000032437	68292	Stt3b	-0.266754	0.00593754	0.0430645	#N/A	#N/A	#N/A
ENSMUSG00000030617	75338	Ccdc83	-0.754725	0.00597154	0.04329	#N/A	#N/A	#N/A
ENSMUSG00000079469	55981	Pigb	0.509617	0.00598296	0.0433516	-0.70976	0.00082535	0.00353504
ENSMUSG00000005836	14465	Gata6	0.302539	0.00599089	0.043388	#N/A	#N/A	#N/A
ENSMUSG00000041642	16565	Kif21b	0.549729	0.0060036	0.0434004	#N/A	#N/A	#N/A
ENSMUSG00000020577	66109	Tspan13	-0.36887	0.0060043	0.0434004	#N/A	#N/A	#N/A
ENSMUSG00000063801	11778	Ap3s2	0.310018	0.00600172	0.0434004	#N/A	#N/A	#N/A
ENSMUSG00000078137	383787	Gm1337	0.564767	0.00599952	0.0434004	-1.5096	8.27619e-05	0.000460481
ENSMUSG00000038967	18604	Pdk2	0.364557	0.00601231	0.0434126	#N/A	#N/A	#N/A
ENSMUSG00000034993	26949	Vat1	-0.427534	0.00601373	0.0434126	#N/A	#N/A	#N/A
ENSMUSG00000022983	224432	Scaf4	0.417715	0.00602362	0.0434555	#N/A	#N/A	#N/A
ENSMUSG00000020431	432530	Adcy1	0.299956	0.00605496	0.0436428	-1.19791	8.11451e-11	1.49914e-09
ENSMUSG00000040407	100986	Akap9	0.302645	0.00605547	0.0436428	-1.74947	3.10642e-27	4.81068e-25
ENSMUSG00000028609	17149	Magoh	-0.368306	0.00609007	0.0438371	#N/A	#N/A	#N/A
ENSMUSG00000050912	71929	Tmem123	-0.346318	0.00609127	0.0438371	#N/A	#N/A	#N/A
ENSMUSG00000027210	17536	Meis2	0.30468	0.00608785	0.0438371	#N/A	#N/A	#N/A
ENSMUSG00000041992	217944	Rapgef5	-0.410636	0.00609918	0.0438727	-0.815108	1.48852e-09	2.24144e-08
ENSMUSG00000035314	233552	Gdpd5	0.381069	0.00611039	0.0439108	#N/A	#N/A	#N/A
ENSMUSG00000028977	69743	Casz1	0.474341	0.00610879	0.0439108	#N/A	#N/A	#N/A
ENSMUSG00000025860	11798	Xiap	-0.447536	0.00611673	0.0439351	#N/A	#N/A	#N/A
ENSMUSG00000060206	242466	Zfp462	0.370257	0.00613024	0.0439896	#N/A	#N/A	#N/A
ENSMUSG00000036995	230837	Asap3	0.413809	0.00612938	0.0439896	#N/A	#N/A	#N/A
ENSMUSG00000051316	24074	Taf7	-0.454957	0.00613743	0.04402	#N/A	#N/A	#N/A
ENSMUSG00000016940	70382	Kctd2	0.364907	0.00617269	0.0442515	#N/A	#N/A	#N/A
ENSMUSG00000064326	30954	Siva1	0.465481	0.00618388	0.0443103	#N/A	#N/A	#N/A
ENSMUSG00000036568	210982	BC032203	0.346604	0.00619469	0.0443664	#N/A	#N/A	#N/A
ENSMUSG00000022500	56722	Litaf	-0.358705	0.0061994	0.0443788	0.604068	0.000636813	0.00282163
ENSMUSG00000055639	13134	Dach1	0.485003	0.00625659	0.0447666	#N/A	#N/A	#N/A
ENSMUSG00000036437	18166	Npy1r	0.531019	0.00626173	0.0447818	-2.17038	8.59068e-19	5.08234e-17
ENSMUSG00000061462	380698	Obscn	0.463175	0.00628971	0.044948	-0.616061	0.000340412	0.00163766
ENSMUSG00000021367	13614	Edn1	-0.596956	0.00629103	0.044948	3.29774	2.03918e-61	2.92826e-58
ENSMUSG00000025190	14718	Got1	0.294012	0.00633398	0.0452114	#N/A	#N/A	#N/A
ENSMUSG00000047368	226016	Fam108b	-0.366218	0.00635745	0.0453572	#N/A	#N/A	#N/A
ENSMUSG00000020407	22271	Upp1	-0.764502	0.00639421	0.0455616	1.28612	2.84218e-08	3.34289e-07
ENSMUSG00000023806	100037282	Rsph3b	0.576189	0.00639349	0.0455616	#N/A	#N/A	#N/A
ENSMUSG00000000838	14265	Fmr1	-0.401245	0.00639531	0.0455616	#N/A	#N/A	#N/A
ENSMUSG00000026208	13346	Des	0.423177	0.00640221	0.0455889	0.92907	8.79148e-22	7.46614e-20
ENSMUSG00000042079	98758	Hnrnpf	-0.386875	0.00640797	0.045608	#N/A	#N/A	#N/A
ENSMUSG00000050248	68525	Evc2	0.345785	0.00641587	0.0456424	#N/A	#N/A	#N/A
ENSMUSG00000030660	18704	Pik3c2a	-0.35776	0.00643669	0.0457686	#N/A	#N/A	#N/A
ENSMUSG00000046798	64945	Cldn12	-0.334892	0.00645848	0.0459015	#N/A	#N/A	#N/A
ENSMUSG00000089911	15247	Hiat1	-0.32755	0.00646278	0.0459101	#N/A	#N/A	#N/A
ENSMUSG00000027002	50884	Nckap1	-0.365907	0.00651378	0.0462504	#N/A	#N/A	#N/A
ENSMUSG00000037344	83704	Slc12a9	0.489152	0.00651966	0.0462699	#N/A	#N/A	#N/A
ENSMUSG00000039686	227693	Zer1	0.362431	0.00652614	0.0462938	#N/A	#N/A	#N/A
ENSMUSG00000027194	74569	Ttc17	0.305072	0.00653593	0.0463412	#N/A	#N/A	#N/A
ENSMUSG00000039298	214444	Cdk5rap2	0.320336	0.00655193	0.0464324	#N/A	#N/A	#N/A
ENSMUSG00000044562	69903	Rasip1	-0.49542	0.00657672	0.0465859	#N/A	#N/A	#N/A
ENSMUSG00000037166	68458	Ppp1r14a	-0.683058	0.00658234	0.0466035	#N/A	#N/A	#N/A
ENSMUSG00000025138	209011	Sirt7	0.432736	0.00659145	0.046629	#N/A	#N/A	#N/A
ENSMUSG00000026768	241226	Itga8	-0.492039	0.00659222	0.046629	#N/A	#N/A	#N/A
ENSMUSG00000042622	17133	Maff	-0.773306	0.0066009	0.0466681	1.01424	6.83883e-09	9.0626e-08
ENSMUSG00000047181	217125	Samd14	0.470932	0.00661237	0.046727	#N/A	#N/A	#N/A
ENSMUSG00000038502	84113	Ptov1	0.327202	0.00663149	0.0467731	#N/A	#N/A	#N/A
[truncated: 11,792 more rows]
