# Supplementary material for: An atrial fibrillation-associated regulatory region modulates cardiac Tbx5 levels and arrhythmia susceptibility
Source: eLife. 2023 Jan 30;12:e80317. doi: 10.7554/eLife.80317 (PMC9928424; doi:10.7554/eLife.80317)
Supplement: Supplementary file 6. [file elife-80317-supp6.xlsx]

## Sheet: Sheet1
Supplemental file 6. DESeq2 result WT v Double
Ensembl Gene ID	EntrezGene ID	Associated Gene Name	Base mean	Log2FC (+ is higher in RE(int)-/-;Prrx1(enh)-/-)	StdErr	Wald-Stats	P-value	P-adj
ENSMUSG00000040721	239102	Zfhx2	126.756	1.68698	0.202254	-8.34091	7.37232e-17	5.79243e-13
ENSMUSG00000030116	50530	Mfap5	1148.18	-1.14775	0.143002	8.02616	1.0057e-15	3.95089e-12
ENSMUSG00000023036	93723	Pcdhga9	353.139	1.20559	0.154111	-7.82288	5.16273e-15	1.62254e-11
ENSMUSG00000029095	231148	Ablim2	951.986	1.07788	0.144952	-7.43612	1.03682e-13	2.03657e-10
ENSMUSG00000038384	208043	Setd1b	605.858	1.40044	0.193797	-7.2263	4.96314e-13	8.66565e-10
ENSMUSG00000027894	229706	Slc6a17	336.773	1.30253	0.185249	-7.03124	2.04705e-12	2.22991e-09
ENSMUSG00000030268	12035	Bcat1	98.2155	-1.5078	0.213095	7.07573	1.48669e-12	2.22991e-09
ENSMUSG00000047485	245683	Klhl34	466.513	-1.71937	0.243784	7.05285	1.75289e-12	2.22991e-09
ENSMUSG00000071862	107065	Lrrtm2	391.729	1.32735	0.189168	-7.01677	2.2705e-12	2.22991e-09
ENSMUSG00000055320	21676	Tead1	6046.9	1.03542	0.146732	-7.05653	1.70711e-12	2.22991e-09
ENSMUSG00000061315	17938	Naca	3655.09	1.33106	0.190721	-6.97908	2.97116e-12	2.59382e-09
ENSMUSG00000032925	223272	Itgbl1	713.241	-0.950393	0.136964	6.93899	3.9492e-12	3.2662e-09
ENSMUSG00000053877	100043597	Srcap	3687.87	0.859157	0.124943	-6.87637	6.13981e-12	4.66352e-09
ENSMUSG00000039115	104099	Itga9	1996.58	-1.03179	0.150095	6.87424	6.23227e-12	4.66352e-09
ENSMUSG00000028634	16656	Hivep3	113.053	1.30947	0.191073	-6.85321	7.22093e-12	5.15772e-09
ENSMUSG00000035112	69847	Wnk4	548.278	1.09004	0.16106	-6.7679	1.30669e-11	8.92752e-09
ENSMUSG00000042436	76293	Mfap4	1239.21	-0.93748	0.139155	6.73694	1.61759e-11	1.01675e-08
ENSMUSG00000030317	110595	Timp4	394.897	-1.28916	0.191683	6.72545	1.75047e-11	1.05796e-08
ENSMUSG00000046694	100342	Fam46b	910.138	-1.57141	0.235108	6.68379	2.32841e-11	1.35513e-08
ENSMUSG00000062785	16504	Kcnc3	57.1661	1.62855	0.245376	-6.63696	3.20209e-11	1.79706e-08
ENSMUSG00000038256	77578	Bcl9	353.184	0.971372	0.146616	-6.62528	3.46587e-11	1.87803e-08
ENSMUSG00000024048	67268	Myl12a	1525.74	-0.784834	0.118996	6.59547	4.23902e-11	2.2204e-08
ENSMUSG00000034958	16467	Atcay	334.396	1.4859	0.226831	-6.55067	5.72799e-11	2.90354e-08
ENSMUSG00000041912	72634	Tdrkh	195.949	1.1999	0.183821	-6.52754	6.68582e-11	3.18366e-08
ENSMUSG00000004360	212448	9330159F19Rik	78.2059	-1.57465	0.242652	6.48936	8.62033e-11	3.98411e-08
ENSMUSG00000023036	93717	Pcdhga9	218.576	1.17275	0.181645	-6.45625	1.0733e-10	4.8188e-08
ENSMUSG00000042793	329252	Lgr6	1251.78	0.813656	0.12615	-6.44993	1.119e-10	4.88444e-08
ENSMUSG00000040003	50791	Magi2	305.745	0.932223	0.144767	-6.43948	1.19885e-10	5.09154e-08
ENSMUSG00000032177	18577	Pde4a	1438.43	0.982813	0.153464	-6.40418	1.51182e-10	6.09146e-08
ENSMUSG00000048154	381022	Mll2	5166.6	1.17191	0.184604	-6.34822	2.17822e-10	8.34841e-08
ENSMUSG00000038369	56406	Ncoa6	983.901	0.785149	0.123881	-6.33792	2.32885e-10	8.71323e-08
ENSMUSG00000032637	233871	Atxn2l	996.544	0.862182	0.136817	-6.30171	2.94374e-10	1.07576e-07
ENSMUSG00000031448	234072	Adprhl1	2852.68	-0.9271	0.149215	6.21316	5.19281e-10	1.81333e-07
ENSMUSG00000052512	78286	Nav2	2565.33	0.842746	0.136623	-6.1684	6.89823e-10	2.30636e-07
ENSMUSG00000023036	93708	Pcdhga9	74.046	1.38166	0.223917	-6.1704	6.81155e-10	2.30636e-07
ENSMUSG00000023036	93703	Pcdhga9	303.042	0.94833	0.154571	-6.13523	8.50339e-10	2.7838e-07
ENSMUSG00000002028	214162	Mll1	3691.17	0.973627	0.15878	-6.13193	8.68195e-10	2.78425e-07
ENSMUSG00000020926	11488	Adam11	742.606	0.984788	0.161225	-6.10817	1.0078e-09	3.10522e-07
ENSMUSG00000039835	215819	Nhsl1	1129.91	0.830183	0.13632	-6.08997	1.12931e-09	3.41268e-07
ENSMUSG00000024617	12322	Camk2a	759.079	0.861707	0.142761	-6.03602	1.57966e-09	4.43263e-07
ENSMUSG00000031119	14735	Gpc4	1252.25	0.761624	0.126555	-6.01813	1.76441e-09	4.86419e-07
ENSMUSG00000039852	68703	Rere	2037.14	0.845895	0.140963	-6.00081	1.96331e-09	5.31923e-07
ENSMUSG00000038013	68524	Wipf2	443.285	0.809218	0.135257	-5.98281	2.19322e-09	5.74405e-07
ENSMUSG00000025404	71750	R3hdm2	2225.78	0.881246	0.147261	-5.98423	2.17412e-09	5.74405e-07
ENSMUSG00000039087	68750	Rreb1	1686.78	0.8789	0.147643	-5.95286	2.63491e-09	6.78771e-07
ENSMUSG00000023036	93707	Pcdhga9	108.828	1.34113	0.22579	-5.93973	2.85489e-09	7.23578e-07
ENSMUSG00000045659	233765	Plekha7	1741.35	0.886254	0.149483	-5.9288	3.05164e-09	7.61167e-07
ENSMUSG00000024002	57261	Brd4	833.66	0.992312	0.167652	-5.9189	3.24109e-09	7.95788e-07
ENSMUSG00000037259	241688	6330439K17Rik	108.897	1.2582	0.214448	-5.86716	4.43334e-09	1.05554e-06
ENSMUSG00000031097	21953	Tnni2	265.444	-1.07044	0.183829	5.82303	5.77906e-09	1.33547e-06
ENSMUSG00000069515	17110	Lyz1	40.4202	-1.51612	0.26113	5.80602	6.3977e-09	1.45701e-06
ENSMUSG00000028463	230099	Car9	164.97	1.16148	0.200582	-5.79056	7.01531e-09	1.50335e-06
ENSMUSG00000025409	110962	Mbd6	235.131	1.17401	0.202583	-5.79523	6.82279e-09	1.50335e-06
ENSMUSG00000047658	545276	Gal3st3	117.74	1.19272	0.20603	-5.78903	7.07955e-09	1.50335e-06
ENSMUSG00000021870	83997	Slmap	7732.5	-0.807182	0.140695	5.73712	9.63024e-09	1.99118e-06
ENSMUSG00000002900	16777	Lamb1	5586.9	-0.617418	0.10787	5.72374	1.04202e-08	2.12653e-06
ENSMUSG00000061436	15258	Hipk2	2207.16	0.846884	0.148087	-5.71881	1.07271e-08	2.1611e-06
ENSMUSG00000027887	17306	Sypl2	148.621	1.33196	0.233092	-5.71429	1.10165e-08	2.16392e-06
ENSMUSG00000052676	215693	Zmat1	238.31	1.0831	0.190075	-5.69824	1.2105e-08	2.34837e-06
ENSMUSG00000046574	233210	Prr12	586.352	1.04858	0.184132	-5.69471	1.23581e-08	2.36823e-06
ENSMUSG00000054509	328417	Parp4	1410.51	0.79457	0.140011	-5.67506	1.38636e-08	2.56297e-06
ENSMUSG00000023905	27279	Tnfrsf12a	1136.09	-1.31578	0.233433	5.63667	1.73372e-08	3.13146e-06
ENSMUSG00000023036	93716	Pcdhga9	249.581	1.09101	0.193995	-5.62391	1.86681e-08	3.33353e-06
ENSMUSG00000056851	18521	Pcbp2	1537.04	0.941034	0.168031	-5.60035	2.13916e-08	3.77695e-06
ENSMUSG00000015944	80909	Gatsl2	936.42	0.721794	0.128998	-5.59538	2.20135e-08	3.84356e-06
ENSMUSG00000040260	76441	Daam2	645.08	0.839749	0.15049	-5.58011	2.40369e-08	4.1056e-06
ENSMUSG00000047888	213988	Tnrc6b	5615.67	0.654017	0.117251	-5.57792	2.43412e-08	4.11288e-06
ENSMUSG00000005611	17540	Mrvi1	1052.99	0.840385	0.15097	-5.56656	2.59824e-08	4.34348e-06
ENSMUSG00000050505	219257	Pcdh20	79.2813	-1.26021	0.228059	5.5258	3.27996e-08	5.36888e-06
ENSMUSG00000021280	74190	1200009I06Rik	233.772	1.04535	0.189363	-5.52034	3.3835e-08	5.48127e-06
ENSMUSG00000020721	78455	Helz	1441.93	0.68867	0.12634	-5.45091	5.01128e-08	7.87472e-06
ENSMUSG00000046275	237858	Tusc5	63.329	-1.32557	0.243496	5.44389	5.21284e-08	8.11035e-06
ENSMUSG00000022665	67896	Ccdc80	9350.52	-0.620716	0.114058	5.4421	5.26553e-08	8.11201e-06
ENSMUSG00000031849	12845	Comp	871.827	-0.887309	0.163546	5.42545	5.78082e-08	8.6514e-06
ENSMUSG00000032420	23959	Nt5e	1077.58	-0.719684	0.132632	5.42619	5.75689e-08	8.6514e-06
ENSMUSG00000022816	14314	Fstl1	8010.26	-0.84207	0.156886	5.3674	7.98816e-08	1.17314e-05
ENSMUSG00000039782	231207	Cpeb2	1619.79	0.774464	0.144576	-5.35679	8.4712e-08	1.23256e-05
ENSMUSG00000044393	13511	Dsg2	4125.85	0.823574	0.153877	-5.35215	8.6913e-08	1.25298e-05
ENSMUSG00000023036	93724	Pcdhga9	330.499	0.792717	0.148754	-5.32905	9.87295e-08	1.4104e-05
ENSMUSG00000024985	21416	Tcf7l2	349.656	0.810085	0.152178	-5.32327	1.01921e-07	1.42147e-05
ENSMUSG00000042846	216028	Lrrtm3	239.612	1.23943	0.232856	-5.32274	1.02219e-07	1.42147e-05
ENSMUSG00000004263	13498	Atn1	492.123	1.09875	0.206896	-5.31063	1.09244e-07	1.50585e-05
ENSMUSG00000028088	14263	Fmo5	639.362	0.854799	0.161211	-5.30236	1.14316e-07	1.56205e-05
ENSMUSG00000064363	17719	mt-Nd4	29187.5	0.939969	0.177786	-5.28707	1.24288e-07	1.68368e-05
ENSMUSG00000028809	51796	Srrm1	1040.48	0.638286	0.121047	-5.27304	1.34185e-07	1.80221e-05
ENSMUSG00000022949	209195	Clic6	43.7989	1.23586	0.235051	-5.25783	1.45764e-07	1.94113e-05
ENSMUSG00000028116	59006	Myoz2	20685.9	-0.547334	0.104135	5.256	1.47221e-07	1.94406e-05
ENSMUSG00000003233	13544	Dvl3	554.652	1.00331	0.191155	-5.24865	1.53219e-07	2.0064e-05
ENSMUSG00000054728	218194	Phactr1	731.853	0.642986	0.123015	-5.22687	1.724e-07	2.23892e-05
ENSMUSG00000056211	226412	R3hdm1	1029.62	0.720255	0.138089	-5.21587	1.82959e-07	2.33741e-05
ENSMUSG00000029714	57330	Gigyf1	990.323	0.899155	0.172784	-5.20393	1.95113e-07	2.47258e-05
ENSMUSG00000026193	14268	Fn1	12114.4	-0.571344	0.109911	5.19825	2.01178e-07	2.52905e-05
ENSMUSG00000059741	17897	Myl3	242.877	-1.02663	0.198384	5.17494	2.27986e-07	2.79888e-05
ENSMUSG00000020524	14799	Gria1	41.3498	-1.39978	0.271181	5.1618	2.44582e-07	2.97934e-05
ENSMUSG00000051984	240667	Sec31b	768.774	0.648002	0.125694	-5.1554	2.53088e-07	3.04571e-05
ENSMUSG00000038604	75687	Fam65a	995.399	0.968648	0.187912	-5.1548	2.53906e-07	3.04571e-05
ENSMUSG00000038648	208647	Creb3l2	3808.18	0.688423	0.133683	-5.14966	2.60959e-07	3.1066e-05
ENSMUSG00000073409	110557	H2-Q6	22.1342	1.42069	0.276231	-5.14312	2.70212e-07	3.16874e-05
ENSMUSG00000026797	20910	Stxbp1	922.977	0.66137	0.12873	-5.13767	2.78171e-07	3.21411e-05
ENSMUSG00000025432	11567	Avil	87.8678	1.30253	0.25352	-5.13779	2.77991e-07	3.21411e-05
ENSMUSG00000046182	269994	Gsg1l	76.577	1.09032	0.212661	-5.12703	2.94344e-07	3.37615e-05
ENSMUSG00000029675	13717	Eln	1873.13	-1.2055	0.235331	5.12258	3.0138e-07	3.4318e-05
ENSMUSG00000043999	237716	Gpr75	54.8859	1.31752	0.258111	-5.10447	3.31731e-07	3.75023e-05
ENSMUSG00000043903	195209	Gm22	234.796	1.08084	0.212083	-5.0963	3.46359e-07	3.86006e-05
ENSMUSG00000075324	60344	Fign	759.145	0.910825	0.178966	-5.08937	3.59248e-07	3.97551e-05
ENSMUSG00000022983	224432	Scaf4	451.857	0.76686	0.150803	-5.08518	3.67271e-07	4.03587e-05
ENSMUSG00000020169	382427	Best3	192.224	1.04865	0.206688	-5.07359	3.90378e-07	4.2188e-05
ENSMUSG00000046959	231583	Slc26a1	107.859	0.990767	0.195309	-5.07282	3.91972e-07	4.2188e-05
ENSMUSG00000029685	78910	Asb15	770.917	1.07274	0.211643	-5.06865	4.00654e-07	4.28291e-05
ENSMUSG00000021943	14560	Gdf10	63.5307	-1.24019	0.245746	5.04663	4.49672e-07	4.74238e-05
ENSMUSG00000028488	20404	Sh3gl2	31.0323	1.32234	0.263066	-5.02663	4.99182e-07	5.22943e-05
ENSMUSG00000021699	100862401	Pde4d	72.8038	1.11058	0.221107	-5.02282	5.09182e-07	5.29887e-05
ENSMUSG00000071226	330409	Cecr2	260.98	0.879214	0.175245	-5.01707	5.24656e-07	5.38853e-05
ENSMUSG00000042390	229542	Gatad2b	440.995	0.954721	0.190366	-5.01519	5.29815e-07	5.40618e-05
ENSMUSG00000040265	103967	Dnm3	144.808	0.909308	0.181395	-5.01286	5.3627e-07	5.43673e-05
ENSMUSG00000003178	194401	Mical3	1774.02	0.668914	0.13364	-5.00534	5.57629e-07	5.61704e-05
ENSMUSG00000042605	20239	Atxn2	1421.51	0.586271	0.117429	-4.99257	5.95799e-07	5.96331e-05
ENSMUSG00000016356	73368	Col20a1	133.442	1.07815	0.216021	-4.99094	6.00857e-07	5.97586e-05
ENSMUSG00000067889	20743	Spnb3	71.7105	1.19994	0.241015	-4.97869	6.40155e-07	6.32667e-05
ENSMUSG00000000317	12029	Bcl6b	509.296	0.847774	0.170952	-4.95912	7.08124e-07	6.86881e-05
ENSMUSG00000053166	104010	Cdh22	200.996	1.08357	0.218483	-4.95951	7.06715e-07	6.86881e-05
ENSMUSG00000007880	93760	Arid1a	2188.65	0.796015	0.160756	-4.95171	7.35638e-07	7.04866e-05
ENSMUSG00000047878	239559	A4galt	313.978	-0.769213	0.155705	4.9402	7.80428e-07	7.40993e-05
ENSMUSG00000042202	320541	Slc35e2	758.61	0.660388	0.133692	-4.93961	7.82772e-07	7.40993e-05
ENSMUSG00000034522	380912	Zfp395	247.5	0.959644	0.194426	-4.93577	7.98349e-07	7.51213e-05
ENSMUSG00000029123	64293	Stk32b	51.8545	1.10736	0.224897	-4.92387	8.48491e-07	7.93642e-05
ENSMUSG00000046329	66972	Slc25a23	1110.95	0.653189	0.132792	-4.91887	8.70438e-07	8.09353e-05
ENSMUSG00000032739	378460	Pram1	81.3754	0.973862	0.199415	-4.88359	1.04172e-06	9.62912e-05
ENSMUSG00000036057	104831	Ptpn23	633.666	0.763141	0.156473	-4.87714	1.07635e-06	9.89105e-05
ENSMUSG00000015090	19215	Ptgds	252.501	0.913094	0.187386	-4.87278	1.10036e-06	0.000100529
ENSMUSG00000035530	20918	Eif1	1049.75	1.02394	0.210617	-4.86161	1.16435e-06	0.00010576
ENSMUSG00000030411	384569	Nova2	108.789	1.12016	0.230639	-4.85678	1.19311e-06	0.00010775
ENSMUSG00000037820	21817	Tgm2	11643	-0.776587	0.160181	4.84819	1.24591e-06	0.000111876
ENSMUSG00000032902	20501	Slc16a1	8878.88	-0.586814	0.121071	4.84686	1.25428e-06	0.000111987
ENSMUSG00000035392	227801	Dennd1a	824.428	0.621915	0.128403	-4.84348	1.27587e-06	0.000113272
ENSMUSG00000057230	269774	Aak1	4709.3	0.527907	0.109044	-4.84122	1.29045e-06	0.000113922
ENSMUSG00000036086	226409	Zranb3	225.059	0.928616	0.191898	-4.83911	1.30419e-06	0.000114492
ENSMUSG00000031722	15439	Hp	46.922	-1.3383	0.276693	4.83679	1.31954e-06	0.000114559
ENSMUSG00000039218	75956	Srrm2	11065.9	0.736252	0.152307	-4.834	1.33818e-06	0.000115539
ENSMUSG00000045967	241263	Gpr158	759.248	0.838174	0.1735	-4.83098	1.35861e-06	0.000116028
ENSMUSG00000021244	56531	Ylpm1	1333.29	0.650542	0.134648	-4.83141	1.35566e-06	0.000116028
ENSMUSG00000022010	21807	Tsc22d1	14154.3	-0.634064	0.131591	4.81843	1.44695e-06	0.000122905
ENSMUSG00000024899	23972	Papss2	701.069	-0.720677	0.149983	4.80507	1.54697e-06	0.000130694
ENSMUSG00000020017	15109	Hal	58.2978	1.0702	0.222992	-4.79928	1.59234e-06	0.000133096
ENSMUSG00000022456	24050	37865	105.052	0.908827	0.189629	-4.79267	1.64579e-06	0.000136115
ENSMUSG00000050295	17300	Foxc1	1031.77	-0.923428	0.192658	4.79308	1.64237e-06	0.000136115
ENSMUSG00000055978	14344	Fut2	67.363	1.06295	0.221944	-4.78928	1.67382e-06	0.000137709
ENSMUSG00000022822	27416	Abcc5	1508.82	0.6373	0.133333	-4.77977	1.75497e-06	0.000143633
ENSMUSG00000051413	54711	Plagl2	238.054	0.787191	0.164777	-4.77731	1.77655e-06	0.000144646
ENSMUSG00000020275	19696	Rel	264.91	0.799413	0.168111	-4.75527	1.98178e-06	0.000160525
ENSMUSG00000062929	12632	Cfl2	7781.57	-0.664916	0.139945	4.75128	2.02131e-06	0.000162887
ENSMUSG00000018476	216850	Kdm6b	865.527	1.06538	0.224344	-4.74888	2.04546e-06	0.000163992
ENSMUSG00000090231	14962	Cfb	206.337	0.996774	0.210227	-4.74142	2.12228e-06	0.000169287
ENSMUSG00000093620	14962	CT025759.1	206.337	0.996774	0.210227	-4.74142	2.12228e-06	0.000169287
ENSMUSG00000023036	93711	Pcdhga9	175.515	0.905537	0.19107	-4.73931	2.14452e-06	0.000170197
ENSMUSG00000002346	73095	Slc25a42	599.956	0.767628	0.162379	-4.72738	2.27431e-06	0.00017959
ENSMUSG00000072972	11498	Adam4	42.5196	1.28307	0.271648	-4.72328	2.32073e-06	0.00018234
ENSMUSG00000059325	74318	Hopx	5382.86	-0.604322	0.12806	4.71904	2.36962e-06	0.000185255
ENSMUSG00000051790	216856	Nlgn2	381.219	0.873176	0.185119	-4.71682	2.39555e-06	0.000186355
ENSMUSG00000041115	245666	Iqsec2	901.151	0.856377	0.181806	-4.7104	2.47234e-06	0.000191381
ENSMUSG00000068740	53883	Celsr2	509.125	0.92064	0.195904	-4.69946	2.60855e-06	0.000199955
ENSMUSG00000064246	12654	Chi3l1	119.287	1.2206	0.260531	-4.68506	2.7988e-06	0.000213497
ENSMUSG00000030766	70497	Arhgap17	480.97	0.629029	0.13431	-4.6834	2.82152e-06	0.00021419
ENSMUSG00000052534	18514	Pbx1	1977.65	0.643859	0.137717	-4.67524	2.93605e-06	0.000221813
ENSMUSG00000028273	56376	Pdlim5	17949.2	-0.667643	0.142854	4.67361	2.95945e-06	0.000222511
ENSMUSG00000055639	13134	Dach1	383.311	0.842357	0.18041	-4.66913	3.02484e-06	0.000226344
ENSMUSG00000028977	69743	Casz1	1361.48	0.67331	0.144571	-4.65729	3.204e-06	0.000237489
ENSMUSG00000032184	70082	Lysmd2	430.42	-0.610609	0.131448	4.64524	3.39686e-06	0.000250602
ENSMUSG00000048065	320635	Cyb5r2	228.804	0.764852	0.164999	-4.63549	3.56089e-06	0.000261476
ENSMUSG00000058056	72333	Palld	3505.38	0.667892	0.144154	-4.63318	3.60099e-06	0.00026319
ENSMUSG00000002565	20259	Scin	89.0781	0.904321	0.195755	-4.61967	3.84353e-06	0.000279617
ENSMUSG00000054871	72309	Tmem158	126.298	-1.03541	0.224433	4.61343	3.96083e-06	0.000286822
ENSMUSG00000020077	19073	Srgn	351.898	-0.64272	0.139466	4.60843	4.05723e-06	0.000292455
ENSMUSG00000047793	208777	Sned1	815.635	0.766631	0.166461	-4.60547	4.11538e-06	0.000295293
ENSMUSG00000037221	68929	Mospd3	55.3245	1.07476	0.233529	-4.60226	4.17922e-06	0.00029851
ENSMUSG00000037664	12577	Cdkn1c	596.393	-0.764044	0.166146	4.59863	4.25278e-06	0.00030239
ENSMUSG00000052566	170833	Hook2	121.227	0.895373	0.194771	-4.59706	4.28496e-06	0.000303126
ENSMUSG00000022464	69354	Slc38a4	706.104	-0.587837	0.127895	4.59625	4.30172e-06	0.000303126
ENSMUSG00000024529	16948	Lox	250.469	-1.04731	0.227949	4.59447	4.33854e-06	0.000304356
ENSMUSG00000024011	74116	Pi16	3359.14	-0.670417	0.146237	4.58445	4.55181e-06	0.00031505
ENSMUSG00000003847	54446	Nfat5	2472.17	0.616834	0.134573	-4.58365	4.56924e-06	0.00031505
ENSMUSG00000044042	14260	Fmn1	2061.08	0.707078	0.154264	-4.58356	4.57117e-06	0.00031505
ENSMUSG00000032657	68521	Fam189b	100.209	0.926939	0.20217	-4.58494	4.54119e-06	0.00031505
ENSMUSG00000033618	71751	Map3k13	104.677	0.884535	0.193232	-4.57759	4.70369e-06	0.000322768
ENSMUSG00000040054	116848	Baz2a	1974.74	0.5755	0.125756	-4.57631	4.73245e-06	0.000323329
ENSMUSG00000042744	269700	Gm15800	3495.76	0.668648	0.146256	-4.57176	4.8364e-06	0.000328133
ENSMUSG00000006906	70527	Stambp	246.633	0.760058	0.166263	-4.57141	4.84452e-06	0.000328133
ENSMUSG00000024008	240058	Cpne5	414.19	0.81599	0.178591	-4.56905	4.89946e-06	0.000329017
ENSMUSG00000089774	53881	Slc5a3	2762.59	1.05449	0.230782	-4.56922	4.89543e-06	0.000329017
ENSMUSG00000030470	13009	Csrp3	29825.6	-0.672506	0.147344	4.56418	5.01446e-06	0.000335307
ENSMUSG00000041559	14264	Fmod	462.735	-0.818595	0.179646	4.5567	5.19624e-06	0.00034599
ENSMUSG00000024803	107765	Ankrd1	67150.3	-0.805721	0.176945	4.55351	5.2759e-06	0.000349812
ENSMUSG00000091712	665119	Sec14l5	114.709	0.911384	0.200222	-4.55187	5.31702e-06	0.000351057
ENSMUSG00000019769	64009	Syne1	4834.85	0.467992	0.103001	-4.54355	5.53145e-06	0.000362863
ENSMUSG00000030213	54343	Atf7ip	2235.89	0.529926	0.116753	-4.53886	5.65585e-06	0.00036878
ENSMUSG00000063275	30963	Ptpla	452.687	-0.939285	0.207403	4.52879	5.93222e-06	0.000383617
ENSMUSG00000015217	15354	Hmgb3	118.045	-0.996665	0.220069	4.52888	5.92975e-06	0.000383617
ENSMUSG00000036959	320376	Bcorl1	432.093	0.938823	0.20736	-4.5275	5.96865e-06	0.000384391
ENSMUSG00000005397	18073	Nid1	8514.06	-0.72166	0.159529	4.52368	6.07724e-06	0.000389787
ENSMUSG00000034438	76074	Gbp8	49.7557	1.12732	0.249374	-4.52062	6.16594e-06	0.000393868
ENSMUSG00000022096	15460	Hr	1130.68	-0.74291	0.164465	4.51712	6.2685e-06	0.000398798
ENSMUSG00000029004	69188	Mll5	2778.49	0.611841	0.13567	-4.50977	6.48966e-06	0.000411204
ENSMUSG00000020740	260302	Gga3	480.325	0.649408	0.144233	-4.50249	6.71607e-06	0.000423841
ENSMUSG00000026478	226519	Lamc1	16200.5	-0.535412	0.119057	4.49712	6.88809e-06	0.000432958
ENSMUSG00000038267	73102	Slc22a23	705.582	0.64951	0.144503	-4.49478	6.96406e-06	0.000435989
ENSMUSG00000011008	68279	Mcoln2	14.8244	1.26203	0.280862	-4.4934	7.00961e-06	0.000437099
ENSMUSG00000050840	23836	Cdh20	35.2348	1.17062	0.261051	-4.48426	7.31668e-06	0.000454444
ENSMUSG00000003814	12317	Calr	5053.53	-0.615422	0.137318	4.48172	7.40442e-06	0.000458083
ENSMUSG00000038902	229584	Pogz	1132.35	0.593695	0.132909	-4.46693	7.93484e-06	0.000487063
ENSMUSG00000006307	75410	Wbp7	1071.42	0.644058	0.144348	-4.46186	8.12527e-06	0.000496811
ENSMUSG00000028348	68016	Murc	1407.64	-0.662249	0.148602	4.45651	8.33032e-06	0.000507375
ENSMUSG00000057440	75739	Mpp7	726.375	-0.75011	0.168449	4.45303	8.46656e-06	0.000513681
ENSMUSG00000038473	70729	Nos1ap	209.826	0.790192	0.177509	-4.45157	8.52465e-06	0.000515217
ENSMUSG00000020571	71853	Pdia6	2691.84	-0.52065	0.117193	4.44267	8.88485e-06	0.000530861
ENSMUSG00000020609	238055	Apob	11.1774	1.24154	0.280366	-4.42828	9.49857e-06	0.000559028
ENSMUSG00000037989	75607	Wnk2	3142.21	0.742992	0.167773	-4.42857	9.48619e-06	0.000559028
ENSMUSG00000038342	208104	Mlxip	2056.21	0.610746	0.137968	-4.42674	9.56693e-06	0.000560951
ENSMUSG00000049612	18377	Omg	41.9901	1.09121	0.247028	-4.41734	9.9922e-06	0.000581546
ENSMUSG00000046480	399548	Scn4b	760.47	0.707489	0.160362	-4.41183	1.02502e-05	0.000594361
ENSMUSG00000034675	56320	Dbn1	441.632	-0.720615	0.16338	4.41066	1.03058e-05	0.000595385
ENSMUSG00000075415	14269	Fnbp1	1308.25	0.61077	0.138617	-4.40617	1.05214e-05	0.000605618
ENSMUSG00000055723	66922	Rras2	1292.13	-0.652289	0.148208	4.40116	1.07674e-05	0.000617514
ENSMUSG00000055024	328572	Ep300	2614.98	0.787085	0.179374	-4.38794	1.14428e-05	0.000646805
ENSMUSG00000049504	212127	2810046L04Rik	193.751	0.813275	0.185321	-4.38845	1.14159e-05	0.000646805
ENSMUSG00000071573	67795	Rnls	159.809	-0.759869	0.173239	4.38625	1.15323e-05	0.000649527
ENSMUSG00000019122	20308	Ccl9	382.382	-0.914402	0.208561	4.38433	1.16342e-05	0.00065293
ENSMUSG00000079465	12828	Col4a3	451.286	-0.663045	0.151693	4.37096	1.23704e-05	0.000687764
ENSMUSG00000079188	665574	Gm7694	388.305	0.776237	0.177601	-4.37068	1.23862e-05	0.000687764
ENSMUSG00000050705	69662	2310061I04Rik	378.019	0.762479	0.174614	-4.36666	1.26163e-05	0.00069807
ENSMUSG00000038173	320981	Enpp6	789.573	-0.700956	0.160935	4.35552	1.32753e-05	0.000726859
ENSMUSG00000036040	77794	Adamtsl2	1850.79	-0.919726	0.211289	4.35294	1.34326e-05	0.000732917
ENSMUSG00000054580	18779	Pla2r1	623.735	0.650263	0.149585	-4.34711	1.37941e-05	0.000750038
ENSMUSG00000005198	20020	Polr2a	1782.31	0.702762	0.161845	-4.3422	1.41063e-05	0.000761743
ENSMUSG00000074207	11522	Adh1	844.659	-0.884946	0.204016	4.33762	1.44032e-05	0.000772461
ENSMUSG00000040524	214812	Zfp609	1106.88	0.613015	0.141654	-4.32754	1.50786e-05	0.000805938
ENSMUSG00000027709	72039	Mccc1	747.976	0.576404	0.133243	-4.32596	1.51871e-05	0.00080625
ENSMUSG00000070733	72313	Fryl	4305.79	0.481457	0.111789	-4.30684	1.65607e-05	0.000873269
ENSMUSG00000036591	71435	Arhgap21	5772.3	0.461777	0.107251	-4.30559	1.66539e-05	0.000875248
ENSMUSG00000027868	21384	Tbx15	21.2343	-1.21275	0.281909	4.3019	1.69336e-05	0.000886982
ENSMUSG00000074305	244895	C230081A13Rik	2337.46	0.509442	0.118465	-4.30035	1.70531e-05	0.000890275
ENSMUSG00000028773	14077	Fabp3	6096.06	-0.535427	0.124547	4.29899	1.71577e-05	0.000892767
ENSMUSG00000021047	664883	Nova1	255.235	0.780123	0.181598	-4.29588	1.74001e-05	0.000902396
ENSMUSG00000021136	64075	Smoc1	1375.05	-0.706971	0.164769	4.29068	1.78127e-05	0.000917732
ENSMUSG00000040761	56381	Spen	1881.38	0.807044	0.188125	-4.28994	1.78719e-05	0.000917761
ENSMUSG00000020263	216190	Appl2	2649.01	0.539739	0.125836	-4.28922	1.793e-05	0.000917761
ENSMUSG00000040896	56543	Kcnd3	872.255	0.623881	0.145601	-4.28487	1.8285e-05	0.00093289
ENSMUSG00000049001	68169	A930038C07Rik	1553.61	0.739334	0.172741	-4.28002	1.86873e-05	0.000950333
ENSMUSG00000051586	100505050	Mical3	2372.41	0.655569	0.153369	-4.27446	1.916e-05	0.000968102
ENSMUSG00000022020	66897	Naa16	293.529	0.804517	0.18821	-4.27457	1.91508e-05	0.000968102
ENSMUSG00000062609	16516	Kcnj15	45.1596	-1.09921	0.257285	4.27236	1.93413e-05	0.000971019
ENSMUSG00000022052	71978	Ppp2r2a	731.943	0.615492	0.144169	-4.26924	1.96142e-05	0.000981586
ENSMUSG00000057315	231532	Arhgap24	1862.71	-0.477095	0.111873	4.2646	2.00259e-05	0.000999006
ENSMUSG00000050211	329502	Pla2g4e	1024.51	0.585059	0.137307	-4.26094	2.03567e-05	0.0010123
ENSMUSG00000014498	237615	Ankrd52	1325.41	0.664795	0.156204	-4.25593	2.08185e-05	0.00102875
ENSMUSG00000045482	100683	Trrap	3215.1	0.521585	0.122735	-4.24969	2.14063e-05	0.00105448
ENSMUSG00000039578	232035	Fam190a	83.6218	0.925826	0.218162	-4.24376	2.19806e-05	0.00107938
ENSMUSG00000039361	233489	Picalm	6915.88	-0.831481	0.196148	4.23906	2.24459e-05	0.00109199
ENSMUSG00000022032	71145	Scara5	1729.64	-0.55364	0.130657	4.23736	2.26168e-05	0.00109691
ENSMUSG00000022206	18162	Npr3	18205.5	-0.698996	0.16543	4.22533	2.38594e-05	0.00115362
ENSMUSG00000061100	57262	Retnla	396.376	-0.714347	0.169201	4.22187	2.42279e-05	0.00116784
ENSMUSG00000033684	104009	Qsox1	1995.05	-0.578531	0.137088	4.22014	2.44148e-05	0.00116968
ENSMUSG00000038056	231051	Mll3	5334.46	0.570598	0.135187	-4.22079	2.43446e-05	0.00116968
ENSMUSG00000031295	110094	Phka2	989.749	0.500351	0.118591	-4.21915	2.45225e-05	0.00117127
ENSMUSG00000021759	19012	Ppap2a	862.2	-0.585246	0.138759	4.21773	2.46774e-05	0.00117509
ENSMUSG00000006241	67119	Ccdc159	65.1807	0.942307	0.223732	-4.21177	2.53377e-05	0.00120289
ENSMUSG00000050919	238803	Zfp366	216.066	0.80254	0.19059	-4.21081	2.54452e-05	0.00120436
ENSMUSG00000048731	70772	Ggnbp1	231.024	0.676653	0.16088	-4.20596	2.59981e-05	0.00122683
ENSMUSG00000031616	13617	Ednra	2107.59	0.612584	0.145744	-4.20314	2.63238e-05	0.00123848
ENSMUSG00000021258	12454	Ccnk	438.025	0.748116	0.178187	-4.1985	2.68689e-05	0.00125644
ENSMUSG00000032481	20588	Smarcc1	939.664	0.550297	0.131078	-4.19823	2.69008e-05	0.00125644
ENSMUSG00000030399	12715	Ckm	15008.7	-0.64372	0.153345	4.19786	2.69453e-05	0.00125644
ENSMUSG00000040687	228355	Madd	387.541	0.624745	0.14897	-4.19375	2.74378e-05	0.00127562
ENSMUSG00000060187	237560	Lrrc10	3256.57	-0.858499	0.204842	4.19103	2.77695e-05	0.00128723
ENSMUSG00000043456	243937	Zfp536	325.702	0.704749	0.168272	-4.18816	2.81221e-05	0.00129974
ENSMUSG00000060206	242466	Zfp462	1155.68	0.518022	0.123736	-4.1865	2.8329e-05	0.00130546
ENSMUSG00000038538	320538	Ubn2	2484.95	0.556705	0.133053	-4.18409	2.86316e-05	0.00131555
ENSMUSG00000032452	64085	Clstn2	39.647	-1.04466	0.249961	4.17931	2.92399e-05	0.00132955
ENSMUSG00000039556	54646	Ppp1r3f	100.948	0.838607	0.200657	-4.17929	2.92416e-05	0.00132955
ENSMUSG00000026042	12832	Col5a2	2533	-0.727956	0.174117	4.18085	2.90423e-05	0.00132955
ENSMUSG00000001240	54409	Ramp2	1444.99	-0.838576	0.200663	4.17904	2.92748e-05	0.00132955
ENSMUSG00000021025	18035	Nfkbia	1238.04	-0.93878	0.224682	4.17827	2.93741e-05	0.00133022
ENSMUSG00000022504	12265	Ciita	100.842	0.927671	0.222181	-4.1753	2.97596e-05	0.0013438
ENSMUSG00000040734	333654	Ppp1r13l	760.415	0.947408	0.227482	-4.16476	3.11676e-05	0.00140335
ENSMUSG00000032356	19417	Rasgrf1	15.2637	1.17146	0.281911	-4.15542	3.24697e-05	0.00145364
ENSMUSG00000051149	11538	Adnp	2261.49	0.555703	0.133763	-4.15438	3.26178e-05	0.00145612
ENSMUSG00000037795	333789	N4bp2	1062.85	0.526056	0.126718	-4.15138	3.30473e-05	0.00146879
ENSMUSG00000048240	14708	Gng7	52.7388	0.934822	0.225199	-4.1511	3.30884e-05	0.00146879
ENSMUSG00000060843	216033	Ctnna3	3722.24	0.534236	0.12873	-4.15006	3.32395e-05	0.00147134
ENSMUSG00000056476	329650	Med12l	601.678	0.729647	0.176098	-4.14342	3.42169e-05	0.00151035
ENSMUSG00000027809	66841	Etfdh	9136.1	-0.498041	0.120387	4.13699	3.51894e-05	0.0015388
ENSMUSG00000031258	331524	Xkrx	15.4627	1.16569	0.281802	-4.13656	3.52549e-05	0.0015388
ENSMUSG00000017969	19223	Ptgis	1688.02	-0.658769	0.159242	4.13689	3.52044e-05	0.0015388
ENSMUSG00000064367	17721	mt-Nd5	31642	0.779773	0.188536	-4.13594	3.53512e-05	0.0015388
ENSMUSG00000006281	21745	Tep1	1191.93	0.494936	0.119735	-4.13358	3.57156e-05	0.00155037
ENSMUSG00000045962	232341	Wnk1	18647.9	0.446562	0.108076	-4.13191	3.59761e-05	0.00155738
ENSMUSG00000030757	210162	Zkscan2	98.0552	0.989952	0.239879	-4.12689	3.6771e-05	0.00158742
ENSMUSG00000024855	107975	Pacs1	612.569	0.556097	0.134872	-4.12315	3.7373e-05	0.00160459
ENSMUSG00000036256	29817	Igfbp7	3396.07	-0.544098	0.132368	4.1105	3.948e-05	0.00167735
ENSMUSG00000054405	68598	Dnajc8	922.685	-0.518733	0.126305	4.107	4.00825e-05	0.00169773
ENSMUSG00000039741	268515	Bahcc1	495.287	0.799217	0.194783	-4.10312	4.07624e-05	0.0017213
ENSMUSG00000022095	239170	Fam160b2	629.403	0.66334	0.161755	-4.1009	4.11544e-05	0.00172915
ENSMUSG00000038738	243961	Shank1	60.1398	1.00142	0.244529	-4.09529	4.21648e-05	0.00175314
ENSMUSG00000020021	13998	Fgd6	758.05	0.531769	0.12985	-4.09525	4.21717e-05	0.00175314
ENSMUSG00000074570	320664	Cass4	28.0936	1.08846	0.265749	-4.09584	4.20638e-05	0.00175314
ENSMUSG00000036617	208618	Etl4	469.761	0.642271	0.157101	-4.08827	4.34608e-05	0.00180196
ENSMUSG00000034898	70598	Filip1	3510.64	-0.579045	0.14173	4.08556	4.39709e-05	0.00181831
ENSMUSG00000050296	74591	Abca12	332.944	0.913284	0.223847	-4.07994	4.50477e-05	0.00184825
ENSMUSG00000091402	217874	BC048943	113.366	0.955282	0.234113	-4.08044	4.49509e-05	0.00184825
ENSMUSG00000030659	53322	Nucb2	373.174	-0.632222	0.154922	4.0809	4.48607e-05	0.00184825
ENSMUSG00000025316	53325	Banp	405.982	0.909354	0.222982	-4.07815	4.53948e-05	0.00185764
ENSMUSG00000091345	665033	Col6a5	599.214	-0.748985	0.183832	4.07429	4.61553e-05	0.00188386
ENSMUSG00000030546	103968	Plin1	65.4728	-1.14736	0.281739	4.07243	4.65253e-05	0.00189404
ENSMUSG00000027533	16592	Fabp5	53.1327	-1.02962	0.252921	4.07093	4.68253e-05	0.00190132
ENSMUSG00000037674	319758	Rfx7	541.778	0.566073	0.139214	-4.0662	4.77859e-05	0.00193035
ENSMUSG00000042215	213539	Bag2	1280.24	-0.536432	0.131958	4.06516	4.79989e-05	0.00193399
ENSMUSG00000020894	22318	Vamp2	704.762	0.584239	0.143885	-4.06045	4.89788e-05	0.0019634
ENSMUSG00000032249	11737	Anp32a	1476.42	-0.503221	0.124158	4.05305	5.05533e-05	0.00201623
ENSMUSG00000048332	108927	Lhfp	2019.52	-0.469736	0.116051	4.04766	5.17316e-05	0.002058
ENSMUSG00000033253	230676	Szt2	1089.52	0.618577	0.152934	-4.04472	5.23854e-05	0.00207875
ENSMUSG00000067780	94227	Pi15	465.854	-0.832011	0.20585	4.04184	5.30344e-05	0.0020992
ENSMUSG00000042359	99031	Osbpl6	1189.67	0.483221	0.119632	-4.03923	5.36265e-05	0.0021173
ENSMUSG00000034845	84094	Plvap	3259.65	-0.67965	0.168522	4.033	5.50695e-05	0.00216883
ENSMUSG00000054641	70945	Mmrn1	381.719	-0.837383	0.207905	4.02771	5.63232e-05	0.00221266
ENSMUSG00000028996	63954	Rbp7	615.331	-0.931596	0.231401	4.02589	5.67605e-05	0.00222427
ENSMUSG00000000085	29871	Scmh1	677.765	0.575044	0.143043	-4.02008	5.81789e-05	0.00227419
ENSMUSG00000033044	68460	Dhrs7c	4146.92	-0.417438	0.103878	4.01854	5.85601e-05	0.00228341
ENSMUSG00000061589	208266	Dot1l	642.821	0.667846	0.166265	-4.01677	5.90021e-05	0.00229495
ENSMUSG00000026113	269180	Inpp4a	1334.6	0.624507	0.155595	-4.01367	5.97826e-05	0.00231385
ENSMUSG00000034312	232227	Iqsec1	3522.52	0.626512	0.15608	-4.01404	5.96873e-05	0.00231385
ENSMUSG00000022867	30940	Usp25	4918.03	-0.436471	0.108901	4.00795	6.12484e-05	0.00235896
ENSMUSG00000038002	57354	Cramp1l	749.268	0.556617	0.139008	-4.00421	6.22252e-05	0.00238499
ENSMUSG00000042254	214425	Cilp	93.1446	-0.980556	0.244882	4.0042	6.22277e-05	0.00238499
ENSMUSG00000004655	11826	Aqp1	7787.68	-0.627158	0.157105	3.99196	6.55301e-05	0.00249937
ENSMUSG00000035373	20306	Ccl7	50.7019	1.12373	0.281772	-3.98807	6.66127e-05	0.00253451
ENSMUSG00000040751	56743	Lat2	52.521	0.914781	0.229781	-3.9811	6.85974e-05	0.00260372
ENSMUSG00000024462	54393	Gabbr1	350.544	0.6094	0.1532	-3.9778	6.95556e-05	0.00263373
ENSMUSG00000074340	12659	Ovgp1	50.9063	1.0144	0.255282	-3.97366	7.07773e-05	0.00267354
ENSMUSG00000009145	93838	Dqx1	51.9023	0.950001	0.239168	-3.97211	7.12385e-05	0.00268451
ENSMUSG00000036437	18166	Npy1r	754.086	0.840714	0.211814	-3.96911	7.2141e-05	0.00269911
ENSMUSG00000026558	80914	Uck2	638.881	-0.780909	0.196738	3.96929	7.20886e-05	0.00269911
ENSMUSG00000044258	13024	Ctla2a	1968.12	-0.889808	0.224906	3.95635	7.61034e-05	0.00284059
ENSMUSG00000034621	237943	Gpatch8	1580.5	0.487878	0.123448	-3.95211	7.7466e-05	0.00287116
ENSMUSG00000052229	574402	Gpr17	774.215	0.862054	0.218094	-3.95268	7.72812e-05	0.00287116
ENSMUSG00000026014	77300	Raph1	2854.12	0.569167	0.144017	-3.95209	7.74706e-05	0.00287116
ENSMUSG00000018217	18858	Pmp22	1893.81	-0.532659	0.135046	3.94427	8.00429e-05	0.00295951
ENSMUSG00000050148	54609	Ubqln2	763.235	0.770471	0.195505	-3.94093	8.11657e-05	0.00299399
ENSMUSG00000022306	22762	Zfpm2	808.356	0.549271	0.139547	-3.9361	8.28173e-05	0.00304775
ENSMUSG00000052488	27967	Cherp	490.878	0.667576	0.169871	-3.92991	8.49782e-05	0.00310546
ENSMUSG00000018593	20692	Sparc	6117.52	-0.705288	0.179536	3.9284	8.55137e-05	0.00311778
ENSMUSG00000023046	16012	Igfbp6	2355.31	-0.762032	0.194232	3.92331	8.73411e-05	0.00317703
ENSMUSG00000073805	627214	Fam196a	111.988	0.887644	0.22641	-3.92052	8.83582e-05	0.00320661
ENSMUSG00000038670	233199	Mybpc2	368.47	-0.646848	0.165194	3.91568	9.01493e-05	0.00323291
ENSMUSG00000007122	12372	Casq1	2266.19	-1.10158	0.281232	3.91698	8.96651e-05	0.00323291
ENSMUSG00000025868	67044	Higd2a	1084.34	-0.484909	0.123834	3.91578	9.01121e-05	0.00323291
ENSMUSG00000026447	240752	Pik3c2b	1516.81	0.48969	0.125185	-3.91173	9.16357e-05	0.00327264
ENSMUSG00000068196	12837	Col8a1	1001.79	-0.852376	0.217968	3.91056	9.20834e-05	0.00328118
ENSMUSG00000033595	213469	Lgi3	62.6683	0.842034	0.215379	-3.90955	9.24673e-05	0.0032874
ENSMUSG00000038412	56295	Higd1a	822.411	-0.690436	0.176696	3.90748	9.32642e-05	0.0033008
ENSMUSG00000038217	380712	Tlcd2	117.94	-0.745968	0.190893	3.90778	9.31483e-05	0.0033008
ENSMUSG00000031239	16431	Itm2a	542.382	-0.845233	0.216685	3.90074	9.58974e-05	0.00338636
ENSMUSG00000034247	353047	Plekhm1	656.313	0.550774	0.141312	-3.89757	9.71622e-05	0.00342333
ENSMUSG00000051517	230098	E130306D19Rik	27.6207	1.06758	0.274152	-3.89412	9.85579e-05	0.00345796
ENSMUSG00000023826	50873	Park2	230.403	0.618861	0.158925	-3.89405	9.8585e-05	0.00345796
ENSMUSG00000023991	74123	Foxp4	405.088	0.811721	0.208618	-3.89093	9.98587e-05	0.0034846
ENSMUSG00000036985	208884	Zdhhc9	640.87	0.632901	0.162676	-3.89057	0.00010001	0.0034846
ENSMUSG00000046794	244416	Ppp1r3b	1120.55	0.845953	0.217611	-3.88746	0.000101299	0.00351394
ENSMUSG00000061086	17896	Myl4	143901	-0.494225	0.127184	3.8859	0.00010195	0.00352871
ENSMUSG00000031636	53318	Pdlim3	2262.96	-0.689072	0.17738	3.88473	0.000102445	0.00353808
ENSMUSG00000008136	14200	Fhl2	6702.48	-0.543585	0.139989	3.88305	0.000103153	0.00355045
ENSMUSG00000060962	73712	Dmkn	101.096	0.939976	0.242086	-3.88281	0.000103255	0.00355045
ENSMUSG00000064080	14115	Fbln2	5292.13	-0.521822	0.134583	3.87731	0.000105616	0.0036237
ENSMUSG00000029406	19679	Pitpnm2	1521.72	0.583396	0.150646	-3.87264	0.000107664	0.00368591
ENSMUSG00000001493	17285	Meox1	283.702	-0.797143	0.205948	3.8706	0.000108566	0.00370439
ENSMUSG00000036545	216725	Adamts2	1504.07	-0.656712	0.16984	3.86664	0.000110343	0.00374809
ENSMUSG00000049090	225791	Zadh2	1637.34	0.417723	0.108038	-3.86644	0.000110434	0.00374809
ENSMUSG00000046139	225929	Patl1	835.503	0.542985	0.140464	-3.86565	0.000110795	0.00375222
ENSMUSG00000033237	77044	Arid2	2018.52	0.426297	0.110327	-3.86396	0.000111565	0.00377017
ENSMUSG00000025903	18777	Lypla1	1434.92	-0.56016	0.14501	3.86289	0.000112053	0.00377855
ENSMUSG00000025241	17281	Fyco1	13922.1	0.591159	0.153152	-3.85996	0.000113405	0.0038073
ENSMUSG00000023912	74011	Slc25a27	182.66	0.710515	0.184135	-3.85866	0.00011401	0.00381181
ENSMUSG00000025227	75146	Tmem180	30.0634	1.02279	0.26517	-3.85712	0.00011473	0.00382774
ENSMUSG00000074994	99003	Qser1	2823.14	0.545954	0.141639	-3.85454	0.000115947	0.00385198
ENSMUSG00000031209	15203	Heph	391.266	-0.675037	0.175241	3.85206	0.000117129	0.00386672
ENSMUSG00000022074	21933	Tnfrsf10b	46.2971	0.958273	0.248751	-3.85234	0.000116993	0.00386672
ENSMUSG00000003378	14809	Grik5	277.725	0.718044	0.186583	-3.84838	0.000118901	0.003917
ENSMUSG00000009185	20307	Ccl8	63.0698	1.04215	0.270936	-3.84647	0.000119834	0.00393947
ENSMUSG00000007030	27762	D17H6S56E-3	284.906	0.743889	0.193503	-3.84432	0.000120886	0.00395019
ENSMUSG00000020183	70574	Cpm	212.402	-0.661982	0.17222	3.8438	0.000121141	0.00395019
ENSMUSG00000066440	211978	Zfyve26	982.78	0.433751	0.112846	-3.84376	0.000121165	0.00395019
ENSMUSG00000001441	19155	Npepps	2357.22	0.544784	0.14176	-3.84301	0.000121535	0.00395405
ENSMUSG00000028106	75137	Rprd2	1727.42	0.512877	0.133494	-3.84195	0.00012206	0.00396292
ENSMUSG00000045672	373864	Col27a1	254.018	0.898623	0.233997	-3.84032	0.000122876	0.00397629
ENSMUSG00000022594	23936	Lynx1	5323.45	-0.53017	0.138196	3.83635	0.000124874	0.00402932
ENSMUSG00000032064	330938	Dixdc1	538.822	0.676979	0.176536	-3.83478	0.000125674	0.00404682
ENSMUSG00000055322	21961	Tns1	32807.8	0.608884	0.158808	-3.83408	0.000126036	0.00405017
ENSMUSG00000020130	66687	Tbc1d15	745.528	0.602018	0.157039	-3.83357	0.000126299	0.00405034
ENSMUSG00000040212	13732	Emp3	436.063	-0.525151	0.137011	3.83291	0.000126636	0.00405288
ENSMUSG00000028426	19359	Rad23b	2666.7	-0.528328	0.13788	3.83181	0.000127205	0.00405774
ENSMUSG00000050234	14612	Gja4	227.536	-0.805705	0.210308	3.83108	0.000127582	0.00405836
ENSMUSG00000036707	12283	Cab39	3533.59	-0.433841	0.113331	3.82808	0.000129146	0.00409152
ENSMUSG00000020251	74782	Glt8d2	284.139	-0.660059	0.17241	3.82843	0.000128963	0.00409152
ENSMUSG00000032232	68178	Cgnl1	7506.63	-0.593773	0.155169	3.82661	0.00012992	0.00410777
ENSMUSG00000018927	20305	Ccl6	588.667	-0.761084	0.199062	3.82335	0.000131652	0.00415417
ENSMUSG00000032366	22003	Tpm1	103085	-0.597932	0.156615	3.81784	0.000134624	0.00423945
ENSMUSG00000013846	20442	St3gal1	1271.8	0.650299	0.170376	-3.81684	0.00013517	0.00424813
ENSMUSG00000034579	237625	Pla2g3	17.8896	1.04448	0.274021	-3.81167	0.00013803	0.00432934
ENSMUSG00000022579	68453	Gpihbp1	797.913	-0.72229	0.189582	3.80992	0.000139014	0.00434288
ENSMUSG00000022865	13052	Cxadr	2414.81	-0.50997	0.133844	3.81017	0.000138871	0.00434288
ENSMUSG00000036792	109241	Mbd5	888.546	0.487714	0.128039	-3.80912	0.000139462	0.00434822
ENSMUSG00000026135	77264	Zfp142	565.382	0.659318	0.173177	-3.80719	0.000140554	0.0043736
ENSMUSG00000018678	78912	Sp2	196.438	0.787419	0.207217	-3.79997	0.000144712	0.00447262
ENSMUSG00000031776	107566	Arl2bp	1537.91	-0.514702	0.135459	3.79969	0.000144875	0.00447262
ENSMUSG00000006014	96875	Prg4	148.889	0.824353	0.216938	-3.79994	0.000144732	0.00447262
ENSMUSG00000021130	108760	Galntl1	222.475	-0.830298	0.21844	3.80103	0.000144098	0.00447262
ENSMUSG00000021748	68263	Pdhb	4171.54	-0.495694	0.130694	3.79278	0.000148971	0.00458108
ENSMUSG00000031637	67620	Lrp2bp	58.5459	0.892758	0.235505	-3.79082	0.000150149	0.00459035
ENSMUSG00000028906	269587	Epb4.1	6988.9	0.569676	0.150273	-3.79094	0.000150077	0.00459035
ENSMUSG00000038633	13244	Degs1	2686.52	-0.563043	0.148505	3.79141	0.000149792	0.00459035
ENSMUSG00000075590	223649	Nrbp2	739.366	0.494666	0.130631	-3.78673	0.00015264	0.00465744
ENSMUSG00000033917	56209	Gde1	1116.91	-0.466887	0.123465	3.78154	0.00015586	0.00474647
ENSMUSG00000048473	330440	Gm766	25.8558	-1.06459	0.281787	3.778	0.000158092	0.00480515
ENSMUSG00000020181	260315	Nav3	306.073	0.724902	0.19212	-3.77318	0.000161179	0.0048801
ENSMUSG00000029761	109624	Cald1	1393.15	-0.477739	0.126646	3.77225	0.00016178	0.00488888
ENSMUSG00000046818	73284	Ddit4l	115.792	0.919595	0.243843	-3.77126	0.000162426	0.00489896
ENSMUSG00000049939	192198	Lrrc4	89.5553	0.810252	0.215189	-3.7653	0.000166351	0.00500774
ENSMUSG00000027346	74182	Gpcpd1	10819.2	-0.634894	0.168789	3.76146	0.000168924	0.00506579
ENSMUSG00000040247	108995	Tbc1d10c	255.228	0.694094	0.184519	-3.76165	0.000168799	0.00506579
ENSMUSG00000032554	22041	Trf	3392.06	-0.580328	0.154452	3.75734	0.000171726	0.00513025
ENSMUSG00000006800	72043	Sulf2	3688.52	-0.510355	0.135899	3.75539	0.000173074	0.00516069
ENSMUSG00000054966	74071	Ifltd1	26.837	1.05205	0.280219	-3.75437	0.000173776	0.00517182
ENSMUSG00000024330	12815	Col11a2	109.071	1.00595	0.268019	-3.75327	0.000174543	0.0051815
ENSMUSG00000020873	110172	Slc35b1	656.838	-0.503521	0.134166	3.75296	0.000174761	0.0051815
ENSMUSG00000018554	53422	Ybx2	116.264	0.839353	0.223686	-3.75236	0.000175175	0.00518398
ENSMUSG00000020321	17449	Mdh1	44609.8	-0.478777	0.127633	3.7512	0.00017599	0.00519832
ENSMUSG00000053279	11668	Aldh1a1	1251.34	-0.631545	0.168394	3.7504	0.000176553	0.00520518
ENSMUSG00000020333	216739	Acsl6	530.243	0.552156	0.147308	-3.74832	0.000178023	0.00523868
ENSMUSG00000052414	223922	Atf7	384.473	0.53176	0.141979	-3.74533	0.000180158	0.00526271
ENSMUSG00000034771	21886	Tle2	221.554	0.814754	0.217541	-3.7453	0.000180179	0.00526271
ENSMUSG00000079363	17472	Gbp4	340.559	0.783079	0.209046	-3.74596	0.000179705	0.00526271
ENSMUSG00000005268	19116	Prlr	373.419	0.785988	0.209793	-3.74649	0.000179328	0.00526271
ENSMUSG00000024251	240174	Thada	1039.71	0.48718	0.130328	-3.73811	0.000185409	0.00539541
ENSMUSG00000033249	26386	Hsf4	80.2102	0.879238	0.235428	-3.73464	0.000187984	0.00545015
ENSMUSG00000030591	57296	Psmd8	2047.15	-0.40737	0.109167	3.73164	0.000190237	0.00547941
ENSMUSG00000019124	69938	Scrn1	469.049	-0.646908	0.173338	3.73205	0.000189925	0.00547941
ENSMUSG00000041849	239319	Card6	163.538	0.6183	0.165714	-3.73114	0.000190615	0.00547941
ENSMUSG00000031949	30947	Adat1	111.892	0.713023	0.191206	-3.72908	0.00019218	0.0055108
ENSMUSG00000028132	99887	Tmem56	139.077	0.758256	0.203438	-3.7272	0.000193617	0.00553182
ENSMUSG00000020009	15979	Ifngr1	1873.32	-0.501147	0.134513	3.72564	0.000194818	0.00555603
ENSMUSG00000036469	72925	March1	104.122	-0.804343	0.216012	3.7236	0.000196398	0.00559095
ENSMUSG00000026610	26381	Esrrg	1200	0.509585	0.136909	-3.72208	0.000197587	0.00561462
ENSMUSG00000061607	240087	Mdc1	684.908	0.519308	0.139589	-3.72027	0.000199009	0.00564482
ENSMUSG00000039117	228980	Taf4a	617.251	0.452432	0.121677	-3.71832	0.000200551	0.00567831
ENSMUSG00000001525	22154	Tubb5	1199.21	-0.531437	0.142981	3.71684	0.000201733	0.00570149
ENSMUSG00000035284	320528	Vps13c	4995.84	0.550307	0.148145	-3.71465	0.000203481	0.00573966
ENSMUSG00000026526	14194	Fh1	8800.58	-0.43304	0.116589	3.71424	0.000203814	0.00573966
ENSMUSG00000028464	22004	Tpm2	2969.24	0.517739	0.139424	-3.71343	0.000204472	0.0057479
ENSMUSG00000052374	11472	Actn2	38367.8	0.531188	0.143151	-3.71069	0.000206696	0.00580003
ENSMUSG00000048120	12495	Entpd1	1529.31	-0.809355	0.218366	3.70642	0.000210208	0.00588807
ENSMUSG00000027254	17754	Mtap1a	2543.49	0.581282	0.156915	-3.70444	0.00021186	0.00592379
ENSMUSG00000022353	211401	Mtss1	1156.89	0.646606	0.174678	-3.7017	0.000214164	0.00597757
ENSMUSG00000020349	19052	Ppp2ca	5132.05	-0.46907	0.126748	3.70081	0.000214916	0.00598793
ENSMUSG00000003161	109552	Sri	811.35	-0.521969	0.141079	3.69982	0.000215752	0.00600058
ENSMUSG00000067377	56496	Tspan6	586.397	-0.737019	0.199402	3.69615	0.000218895	0.00605582
ENSMUSG00000079037	19122	Prnp	3242.53	-0.419739	0.113553	3.69641	0.00021867	0.00605582
ENSMUSG00000072647	280668	Adam1a	98.431	0.781933	0.211615	-3.69507	0.000219824	0.00607085
ENSMUSG00000032334	16949	Loxl1	2092.94	-0.636933	0.172433	3.69379	0.000220935	0.00609084
ENSMUSG00000053293	107939	Pom121	426.224	0.820383	0.222571	-3.68594	0.000227857	0.00624876
ENSMUSG00000036473	224617	Tbc1d24	562.536	0.457423	0.124145	-3.68459	0.000229069	0.00627108
ENSMUSG00000038260	68667	Trpm4	646.862	0.558532	0.151663	-3.68271	0.00023077	0.00629569
ENSMUSG00000029661	12843	Col1a2	9877.98	-0.696541	0.189276	3.68003	0.000233208	0.00632904
ENSMUSG00000035545	232798	Leng8	2421.33	0.617576	0.167815	-3.6801	0.000233143	0.00632904
ENSMUSG00000034981	231440	Parm1	1924.54	0.451784	0.12276	-3.68023	0.000233023	0.00632904
ENSMUSG00000021127	12192	Zfp36l1	1239.51	0.8135	0.221084	-3.6796	0.000233603	0.00632904
ENSMUSG00000044583	170743	Tlr7	194.182	-0.702891	0.191145	3.67726	0.000235752	0.00637626
ENSMUSG00000021282	217869	Eif5	4259.7	-0.467128	0.127082	3.67579	0.000237116	0.00640214
ENSMUSG00000020261	215335	Slc36a1	400.747	0.573318	0.15604	-3.67417	0.000238625	0.00643181
ENSMUSG00000062515	11770	Fabp4	3729.91	-0.637229	0.173478	3.67326	0.000239475	0.00644369
ENSMUSG00000029407	56041	Uso1	1966.4	0.536114	0.146148	-3.6683	0.000244165	0.00654747
ENSMUSG00000003518	72349	Dusp3	4174.57	-0.417552	0.113849	3.6676	0.000244837	0.00655429
ENSMUSG00000024085	17158	Man2a1	2000.68	-0.555647	0.151545	3.66654	0.000245857	0.0065704
ENSMUSG00000024997	11757	Prdx3	5192.21	-0.483585	0.131975	3.66423	0.000248088	0.00661877
ENSMUSG00000063952	268936	Brpf3	397.561	0.785872	0.214532	-3.66319	0.000249094	0.00663434
ENSMUSG00000035105	112407	Egln3	837.243	0.58204	0.158967	-3.66138	0.000250859	0.00667005
ENSMUSG00000027349	68215	Fam98b	199.505	0.60123	0.164312	-3.65906	0.000253138	0.00671927
ENSMUSG00000068599	433003	Gm5481	17.7485	1.02267	0.279875	-3.65401	0.000258178	0.00682997
ENSMUSG00000040018	226139	Cox15	1351.31	-0.425985	0.116665	3.65134	0.000260872	0.00687809
ENSMUSG00000017144	74194	Rnd3	836.986	-0.471096	0.129105	3.64893	0.000263334	0.00690823
ENSMUSG00000093668	75507	Pou5f2	26.2202	0.995497	0.272798	-3.64921	0.000263048	0.00690823
ENSMUSG00000057751	230971	Megf6	1024.14	-0.607757	0.16654	3.64931	0.000262943	0.00690823
ENSMUSG00000031517	234267	Gpm6a	2071.41	-0.694734	0.190474	3.6474	0.00026491	0.006938
ENSMUSG00000037762	66859	Slc16a9	161.053	-0.598575	0.164197	3.64547	0.0002669	0.00697027
ENSMUSG00000022179	74359	4931414P19Rik	130.969	0.683636	0.187623	-3.64366	0.000268786	0.00698133
ENSMUSG00000027175	320554	Tcp11l1	121.08	0.636292	0.174621	-3.64384	0.000268596	0.00698133
ENSMUSG00000042870	21968	Tom1	87.4061	0.862798	0.237055	-3.63965	0.000273012	0.00706772
ENSMUSG00000037827	21968	Gm5884	87.4061	0.862798	0.237055	-3.63965	0.000273012	0.00706772
ENSMUSG00000020091	13688	Eif4ebp2	524.079	0.597688	0.164332	-3.63707	0.000275756	0.00709204
ENSMUSG00000037266	27981	D4Wsu53e	3377.91	0.497272	0.13671	-3.63743	0.000275375	0.00709204
ENSMUSG00000068663	74374	Clec16a	1643.41	0.439385	0.120796	-3.63743	0.000275375	0.00709204
ENSMUSG00000053985	243906	Zfp14	198.612	0.632244	0.173791	-3.63795	0.000274816	0.00709204
ENSMUSG00000028211	60599	Trp53inp1	946.773	-0.603859	0.166179	3.63378	0.000279301	0.00717147
ENSMUSG00000014907	234344	Naf1	240.063	0.61151	0.168466	-3.62988	0.000283558	0.00724526
ENSMUSG00000003575	382056	Crtc1	347.216	0.65453	0.18031	-3.63003	0.000283393	0.00724526
ENSMUSG00000020564	380753	Atxn7l1	197.079	0.578737	0.159474	-3.62904	0.000284481	0.00725704
ENSMUSG00000007827	232339	Ankrd26	286.831	0.553343	0.152566	-3.6269	0.000286841	0.00730538
ENSMUSG00000020142	55963	Slc1a4	347.511	-0.689323	0.190138	3.62539	0.000288525	0.00733638
ENSMUSG00000026116	56030	Tmem131	2087.48	0.501515	0.138353	-3.62489	0.00028908	0.00733861
ENSMUSG00000048376	14062	F2r	2917.69	-0.540193	0.149051	3.62421	0.00028985	0.0073463
ENSMUSG00000020019	57764	Ntn4	513.573	-0.514713	0.142047	3.62355	0.000290591	0.00735321
ENSMUSG00000062438	280667	Adam1b	9.98693	1.00319	0.276888	-3.62307	0.000291124	0.00735485
ENSMUSG00000031748	14681	Gnao1	2374.75	0.475904	0.131464	-3.62004	0.000294559	0.0074297
ENSMUSG00000024169	106633	Ift140	532.519	0.541826	0.149693	-3.61959	0.000295074	0.00743075
ENSMUSG00000026638	54139	Irf6	513.107	-0.566083	0.156456	3.61816	0.00029671	0.00746
ENSMUSG00000025479	13106	Cyp2e1	178.683	-0.999243	0.276857	3.60923	0.000307101	0.00769664
ENSMUSG00000034303	245902	Ccdc15	145.773	0.638078	0.17683	-3.60842	0.000308064	0.00770847
ENSMUSG00000042567	674895	Nek10	19.8845	-1.00974	0.280135	3.60446	0.000312802	0.00780216
ENSMUSG00000028937	70025	Acot7	1314.65	-0.490816	0.136284	3.60142	0.000316485	0.00788153
ENSMUSG00000064127	26896	Med14	1458.48	0.444655	0.123592	-3.59777	0.000320958	0.00796614
ENSMUSG00000062694	12391	Cav3	1192.91	-0.589677	0.163936	3.597	0.00032191	0.00796614
ENSMUSG00000035722	27403	Abca7	913.397	0.67242	0.187319	-3.58971	0.000331041	0.00817922
ENSMUSG00000024050	22404	Wiz	340.265	0.639714	0.178408	-3.58569	0.00033619	0.00826742
ENSMUSG00000010175	19130	Prox1	1110.23	0.505583	0.140978	-3.58625	0.000335473	0.00826742
ENSMUSG00000043719	245026	Col6a6	1187.96	-0.762472	0.21279	3.58321	0.000339398	0.00832028
ENSMUSG00000049112	18430	Oxtr	40.6791	0.947492	0.264544	-3.5816	0.000341498	0.00835872
ENSMUSG00000007817	328365	Zmiz1	2214.08	0.636379	0.177702	-3.58115	0.000342084	0.00836004
ENSMUSG00000066043	100169	Phactr4	614.007	0.487474	0.136515	-3.57084	0.00035584	0.00866925
ENSMUSG00000032231	12306	Anxa2	2989.41	-0.546694	0.153169	3.56921	0.000358054	0.00869623
ENSMUSG00000020847	380714	Rph3al	72.2636	0.757049	0.212084	-3.56958	0.000357559	0.00869623
ENSMUSG00000001918	20514	Slc1a5	924.892	-0.6217	0.174256	3.56774	0.000360069	0.00873166
ENSMUSG00000004267	13807	Eno2	207.476	0.592143	0.166063	-3.56577	0.000362791	0.00878413
ENSMUSG00000039633	244421	Lonrf1	593.145	0.680756	0.191099	-3.56232	0.000367588	0.00888658
ENSMUSG00000021983	50769	Atp8a2	392.02	0.528596	0.148547	-3.55844	0.000373059	0.00897741
ENSMUSG00000034066	227377	Farp2	516.665	0.596804	0.167774	-3.55719	0.000374846	0.00899567
ENSMUSG00000040312	240084	Cchcr1	77.8399	0.744417	0.2093	-3.55671	0.000375535	0.00899567
ENSMUSG00000007080	18973	Pole	118.236	0.783117	0.220163	-3.55699	0.000375129	0.00899567
ENSMUSG00000040820	110948	Hlcs	331.84	0.503679	0.141735	-3.55367	0.000379893	0.0090862
ENSMUSG00000036528	19024	Ppfibp2	1194.23	0.418855	0.117957	-3.55092	0.000383882	0.00915376
ENSMUSG00000028854	20544	Slc9a1	530.335	0.593106	0.167132	-3.54872	0.000387114	0.00921684
ENSMUSG00000040086	435766	Tnni3k	818.393	0.731288	0.206269	-3.54532	0.000392139	0.00932235
ENSMUSG00000029505	75560	Ep400	2450.52	0.443679	0.125225	-3.54306	0.000395511	0.00937772
ENSMUSG00000027858	70747	Tspan2	847.69	-0.519851	0.146766	3.54204	0.00039705	0.00939645
ENSMUSG00000018001	19159	Cyth3	1255.76	-0.453158	0.128118	3.53703	0.000404648	0.00954752
ENSMUSG00000025723	68039	Nmb	53.0061	-0.964462	0.272647	3.5374	0.000404092	0.00954752
ENSMUSG00000022793	56375	B4galt4	356.593	-0.537847	0.152129	3.53546	0.000407064	0.00959011
ENSMUSG00000029478	20602	Ncor2	2125.29	0.735205	0.208282	-3.52986	0.000415781	0.00975161
ENSMUSG00000051331	12288	Cacna1c	6031.77	0.610247	0.173117	-3.52506	0.000423381	0.00988561
ENSMUSG00000037075	75841	Rnf139	1502.35	-0.451127	0.128134	3.52075	0.000430324	0.0100231
ENSMUSG00000038668	14745	Lpar1	780.866	-0.593578	0.1686	3.52062	0.000430545	0.0100231
ENSMUSG00000070348	12443	Ccnd1	1109.57	-0.827903	0.235366	3.51751	0.00043562	0.0101182
ENSMUSG00000036371	66870	Serbp1	6546.53	-0.383758	0.109105	3.51733	0.000435917	0.0101182
ENSMUSG00000086040	330319	Wipf3	1009.4	0.565027	0.160703	-3.51598	0.000438142	0.0101548
ENSMUSG00000033174	23945	Mgll	2208.13	-0.586312	0.166854	3.51393	0.000441525	0.0102182
ENSMUSG00000051579	66684	Tceal8	808.18	-0.637432	0.181511	3.51181	0.000445058	0.0102848
ENSMUSG00000036751	110323	Cox6b1	9124.65	-0.39726	0.113229	3.50847	0.000450695	0.0103845
ENSMUSG00000000168	235339	Dlat	8523.37	-0.440313	0.125562	3.50673	0.000453652	0.0104373
ENSMUSG00000047415	238377	Gpr68	52.6209	0.863938	0.246429	-3.50583	0.000455191	0.0104574
ENSMUSG00000047989	225280	Ino80c	656.337	-0.479004	0.136789	3.50177	0.000462186	0.0106026
ENSMUSG00000034245	232232	Hdac11	855.917	0.576299	0.164678	-3.49956	0.000466027	0.0106751
ENSMUSG00000051236	320183	Msrb3	5137.59	-0.505409	0.144535	3.49681	0.000470864	0.010739
ENSMUSG00000031825	78892	Crispld2	3801.9	-0.416451	0.119092	3.49688	0.000470742	0.010739
ENSMUSG00000032816	56741	Igdcc4	807.428	0.518143	0.148149	-3.49744	0.000469751	0.010739
ENSMUSG00000005682	103135	Pan2	575.371	0.486006	0.139046	-3.49529	0.000473554	0.0107691
ENSMUSG00000001700	107022	Gramd3	608.426	-0.468118	0.134052	3.49205	0.000479321	0.0108845
ENSMUSG00000020135	23805	Apc2	604.842	0.728056	0.208738	-3.48789	0.000486854	0.0110078
ENSMUSG00000019278	13479	Dpep1	3286.1	-0.794572	0.227842	3.48738	0.000487779	0.0110129
ENSMUSG00000026814	13805	Eng	7344.57	-0.537613	0.154323	3.48369	0.000494553	0.0111498
ENSMUSG00000044340	98432	Phlpp1	1199.3	0.431623	0.123918	-3.48313	0.000495595	0.0111573
ENSMUSG00000050947	229715	Amigo1	821.361	0.514252	0.147729	-3.48105	0.000499449	0.0112145
ENSMUSG00000053024	21367	Cntn2	507.011	-0.831034	0.238735	3.48099	0.000499565	0.0112145
ENSMUSG00000038702	319901	Dsel	764.604	-0.615673	0.17697	3.47898	0.000503332	0.011283
ENSMUSG00000059355	414077	BC056474	184.273	-0.548504	0.157795	3.47606	0.000508838	0.0113902
ENSMUSG00000043162	66459	Pigy	1570.59	-0.517313	0.148914	3.4739	0.000512957	0.0114497
ENSMUSG00000047787	396184	Flrt1	535.462	0.600495	0.172955	-3.47198	0.000516641	0.0115156
ENSMUSG00000033576	71939	Apol6	27.2347	-0.976985	0.281909	3.46561	0.000529036	0.0117284
ENSMUSG00000027808	28146	Serp1	1439.64	-0.45683	0.131821	3.46554	0.000529172	0.0117284
ENSMUSG00000031872	65115	Bean1	47.57	-0.876657	0.253341	3.46038	0.000539409	0.0119384
ENSMUSG00000079469	55981	Pigb	131.139	0.589342	0.170372	-3.45914	0.000541902	0.0119767
ENSMUSG00000037363	270035	Letm2	112.9	0.642727	0.185846	-3.45839	0.000543414	0.0119892
ENSMUSG00000014164	100503085	Klhl3	106.683	0.684258	0.197964	-3.45647	0.000547292	0.0120282
ENSMUSG00000022479	22337	Vdr	70.2895	0.878278	0.254127	-3.45605	0.000548144	0.0120301
ENSMUSG00000028960	63958	Ube4b	1709.74	0.563983	0.163252	-3.45468	0.000550956	0.0120413
ENSMUSG00000037791	268448	Phf12	736.098	0.407533	0.117989	-3.454	0.000552346	0.0120549
ENSMUSG00000063810	236266	Alms1	546.032	0.569458	0.164954	-3.45222	0.000556	0.0121179
ENSMUSG00000072919	71275	4933437F05Rik	21.9445	0.963946	0.279385	-3.45025	0.000560073	0.0121897
ENSMUSG00000042423	14123	Fbrs	480.782	0.705257	0.20451	-3.44852	0.000563661	0.0122473
ENSMUSG00000024388	17922	Myo7b	69.135	0.850022	0.24651	-3.44822	0.000564284	0.0122473
ENSMUSG00000023994	18044	Nfya	596.756	0.577959	0.167655	-3.44732	0.000566183	0.0122528
ENSMUSG00000020644	15902	Id2	539.8	-0.59995	0.174138	3.44526	0.00057051	0.0123146
ENSMUSG00000015659	321007	Serac1	783.966	0.473669	0.137524	-3.44427	0.000572613	0.012343
ENSMUSG00000007646	114714	Rad51c	62.9218	0.818874	0.23787	-3.44252	0.000576318	0.0123893
ENSMUSG00000037996	76376	Slc24a2	533.261	0.633397	0.183993	-3.44251	0.000576336	0.0123893
ENSMUSG00000029683	93677	Lmod2	12245.6	-0.579518	0.168458	3.44013	0.000581425	0.0124162
ENSMUSG00000047181	217125	Samd14	154.804	0.610433	0.177378	-3.44143	0.000578646	0.0124162
ENSMUSG00000039126	353211	Prune2	1182.64	0.503643	0.146404	-3.44008	0.000581538	0.0124162
ENSMUSG00000042851	78751	Zc3h6	521.374	0.564863	0.164149	-3.44115	0.000579239	0.0124162
ENSMUSG00000000567	20682	Sox9	204.242	0.800706	0.232891	-3.43811	0.00058579	0.012473
ENSMUSG00000037210	231128	Fam193a	1251.31	0.436043	0.126868	-3.43698	0.000588241	0.0124821
ENSMUSG00000007440	353237	Pcdha4	21.8266	0.96287	0.28014	-3.4371	0.000587985	0.0124821
ENSMUSG00000025766	73852	D3Ertd751e	146.929	0.789999	0.229922	-3.43594	0.000590505	0.0125057
ENSMUSG00000020170	327826	Frs2	1066.14	0.485706	0.141429	-3.43428	0.000594131	0.0125486
ENSMUSG00000054823	234135	Whsc1l1	1742.5	0.468663	0.136455	-3.43457	0.000593494	0.0125486
ENSMUSG00000041653	116939	Pnpla3	40.6566	-0.920791	0.268248	3.43261	0.00059781	0.0125756
ENSMUSG00000056220	18783	Pla2g4a	689.621	-0.563847	0.164238	3.43311	0.000596709	0.0125756
ENSMUSG00000020680	70439	Taf15	319.658	0.52878	0.154031	-3.43295	0.000597044	0.0125756
ENSMUSG00000009739	19009	Pou6f1	435.791	0.496833	0.144777	-3.4317	0.000599803	0.0126007
ENSMUSG00000026483	63913	Fam129a	1068.28	-0.397406	0.115896	3.42899	0.000605833	0.0127104
ENSMUSG00000029380	14825	Cxcl1	60.3302	0.949444	0.276971	-3.42796	0.000608145	0.0127418
ENSMUSG00000074824	432770	Zfp708	66.9062	0.745627	0.217588	-3.42678	0.00061078	0.01278
ENSMUSG00000029859	13835	Epha1	198.306	0.816515	0.238326	-3.42605	0.000612437	0.0127976
ENSMUSG00000030711	20887	Sult1a1	1212.43	-0.711556	0.20772	3.42555	0.000613557	0.012804
ENSMUSG00000033852	211429	Pla2g4b	148.58	0.67925	0.198436	-3.42301	0.000619312	0.012907
ENSMUSG00000054203	226695	Ifi205	136.189	-0.920655	0.269106	3.42116	0.000623539	0.0129436
ENSMUSG00000031189	14266	Aff2	420.905	0.516342	0.150915	-3.42141	0.000622966	0.0129436
ENSMUSG00000024901	240518	Peli3	73.8714	0.774213	0.226254	-3.42188	0.000621895	0.0129436
ENSMUSG00000039716	208869	Dock3	39.4346	0.84581	0.247413	-3.41862	0.000629395	0.0130307
ENSMUSG00000051098	72852	Mblac2	102.317	0.69804	0.204358	-3.41577	0.000636015	0.0131504
ENSMUSG00000021991	12294	Cacna2d3	275.689	0.608708	0.178276	-3.41442	0.000639173	0.0131984
ENSMUSG00000037962	73121	Fam101a	47.7894	0.859416	0.251761	-3.41362	0.000641065	0.0132201
ENSMUSG00000028955	22319	Vamp3	694.011	-0.469144	0.137557	3.41054	0.000648349	0.0133528
ENSMUSG00000016382	102866	Pls3	1662.65	-0.539566	0.158229	3.41002	0.000649578	0.0133606
ENSMUSG00000020108	74747	Ddit4	737.313	-0.921252	0.270346	3.40767	0.000655192	0.0134537
ENSMUSG00000048387	23967	Osr1	407.843	-0.576042	0.169056	3.40741	0.000655818	0.0134537
ENSMUSG00000044934	238673	Zfp367	984.058	-0.522657	0.153448	3.40608	0.00065903	0.0134606
ENSMUSG00000031253	68792	Srpx2	205.426	-0.64944	0.190644	3.40655	0.000657885	0.0134606
ENSMUSG00000031778	20312	Cx3cl1	100.9	0.845217	0.248166	-3.40585	0.00065958	0.0134606
ENSMUSG00000038462	66694	Uqcrfs1	11578.5	-0.403693	0.118509	3.40642	0.00065821	0.0134606
ENSMUSG00000032202	11891	Rab27a	275.243	-0.541591	0.159108	3.40391	0.000664275	0.0135388
ENSMUSG00000042804	100129	Gpr153	1247.68	-0.564029	0.165722	3.40347	0.00066535	0.0135432
ENSMUSG00000023968	114570	Crip3	147.92	0.862721	0.253611	-3.40175	0.000669554	0.01359
ENSMUSG00000025255	80892	Zfhx4	185.002	0.627179	0.184385	-3.40147	0.000670247	0.01359
ENSMUSG00000078651	237940	Aoc2	48.1827	0.806288	0.237071	-3.40105	0.000671284	0.0135935
ENSMUSG00000034452	214111	Slc24a1	18.8107	0.929868	0.273494	-3.39996	0.000673965	0.0136302
ENSMUSG00000042045	66402	Sln	36394.3	-0.358013	0.105327	3.39906	0.00067619	0.0136401
ENSMUSG00000001855	227720	Nup214	1244.33	0.483013	0.142098	-3.39915	0.000675963	0.0136401
ENSMUSG00000017167	53321	Cntnap1	171.912	0.700368	0.206103	-3.39814	0.000678467	0.0136685
ENSMUSG00000044139	330657	Prss53	75.8465	0.750239	0.220818	-3.39754	0.000679939	0.0136806
ENSMUSG00000022701	212153	2610015P09Rik	159.872	0.648369	0.191005	-3.39452	0.000687486	0.0137641
ENSMUSG00000079293	56644	Clec7a	49.4171	-0.87068	0.256484	3.39467	0.000687113	0.0137641
ENSMUSG00000091337	58521	Eid1	1338.83	-0.564298	0.166222	3.39485	0.000686652	0.0137641
ENSMUSG00000047368	226016	Fam108b	394.173	-0.50729	0.149446	3.39448	0.000687594	0.0137641
ENSMUSG00000024260	269003	Sap130	485.703	0.430243	0.126776	-3.39373	0.000689481	0.0137843
ENSMUSG00000040093	171543	Bmf	291.639	-0.553482	0.163376	3.38778	0.000704612	0.0140333
ENSMUSG00000071659	68693	Hnrnpul2	2848.09	0.450973	0.133153	-3.38688	0.000706933	0.0140617
ENSMUSG00000034342	12402	Cbl	998.694	0.407826	0.120435	-3.38627	0.000708504	0.0140751
ENSMUSG00000062825	11465	Actg1	189.756	0.824327	0.24347	-3.38574	0.000709857	0.0140842
ENSMUSG00000030655	233789	Smg1	5781.79	0.423781	0.125197	-3.38491	0.000712006	0.0140913
ENSMUSG00000055302	67568	Mrfap1	1848.87	-0.416074	0.122988	3.38304	0.000716892	0.0141701
ENSMUSG00000051550	68490	Zfp579	1011.12	0.627349	0.185588	-3.38034	0.000723963	0.0142917
ENSMUSG00000063455	330286	D630045J12Rik	150.781	0.816273	0.241501	-3.38	0.000724864	0.0142917
ENSMUSG00000026361	214498	Cdc73	688.405	0.56211	0.166389	-3.37829	0.000729368	0.0143421
ENSMUSG00000015354	76477	Pcolce2	1291.08	-0.534559	0.158224	3.37849	0.00072886	0.0143421
ENSMUSG00000016496	60533	Cd274	133.85	0.831194	0.246061	-3.378	0.000730159	0.0143421
ENSMUSG00000027706	69276	Sec62	2705.9	-0.442077	0.13093	3.37643	0.000734326	0.014406
ENSMUSG00000022521	12914	Crebbp	3377.86	0.555369	0.164501	-3.37609	0.00073525	0.0144061
ENSMUSG00000022440	72709	C1qtnf6	124.863	-0.79781	0.236529	3.37299	0.000743574	0.0145035
ENSMUSG00000068284	207806	Gm608	1942.81	0.433974	0.128663	-3.37295	0.000743681	0.0145035
ENSMUSG00000026582	20339	Sele	51.2204	0.946587	0.281151	-3.36683	0.000760384	0.014788
ENSMUSG00000037801	78250	Iqch	13.1125	0.93502	0.277755	-3.36634	0.000761718	0.0147956
ENSMUSG00000051067	237403	Lingo3	58.3526	0.825197	0.245183	-3.36564	0.000763668	0.0148151
ENSMUSG00000029231	18595	Pdgfra	5388.06	-0.39521	0.117473	3.36427	0.000767454	0.0148531
ENSMUSG00000022205	20024	Sub1	961.462	-0.46962	0.139591	3.36425	0.000767515	0.0148531
ENSMUSG00000035765	69190	Dym	1878.34	0.514129	0.152878	-3.36299	0.000771031	0.0149028
ENSMUSG00000038831	241308	Ralgps1	129.662	0.626206	0.186271	-3.3618	0.000774362	0.0149488
ENSMUSG00000038332	140742	Sesn1	3945.15	-0.440009	0.130949	3.36015	0.000778988	0.0150197
ENSMUSG00000024654	66514	Asrgl1	947.244	0.548377	0.163251	-3.35911	0.000781937	0.015058
ENSMUSG00000037007	56314	Zfp113	394.102	0.457855	0.13635	-3.35794	0.000785256	0.0151034
ENSMUSG00000025279	13421	Dnase1l3	23.0462	0.909405	0.270893	-3.35707	0.000787738	0.0151327
ENSMUSG00000078578	66105	Ube2d3	3033.34	-0.555271	0.165503	3.35504	0.000793528	0.0152067
ENSMUSG00000048794	243538	Ccdc37	29.7725	0.85175	0.253906	-3.35458	0.000794849	0.0152135
ENSMUSG00000037355	71101	4933407H18Rik	510.849	0.507296	0.151306	-3.35278	0.000800052	0.0152944
ENSMUSG00000022110	20916	Sucla2	10159.4	-0.444966	0.13274	3.35215	0.000801861	0.0153104
ENSMUSG00000030376	110891	Slc8a2	20.9648	0.930959	0.27794	-3.34949	0.000809597	0.0154393
ENSMUSG00000028367	22166	Txn1	973.224	-0.517868	0.154639	3.34888	0.000811398	0.0154549
ENSMUSG00000033526	327655	Ppip5k1	1567.45	0.437078	0.130569	-3.34748	0.000815488	0.015514
ENSMUSG00000057637	110593	Prdm2	1660.94	0.520431	0.155512	-3.34656	0.000818219	0.0155472
ENSMUSG00000018126	207495	Baiap2l2	51.6767	0.901685	0.269577	-3.34481	0.000823384	0.0156264
ENSMUSG00000035189	320091	Ano4	700.837	0.681988	0.204079	-3.34178	0.000832441	0.0157792
ENSMUSG00000002771	14814	Grin2d	34.2738	0.875919	0.262166	-3.34109	0.000834505	0.0157867
ENSMUSG00000058779	67952	Tomm20	804.097	-0.420794	0.125962	3.34064	0.00083585	0.0157867
ENSMUSG00000040329	16196	Il7	31.3951	0.880151	0.263465	-3.34068	0.000835744	0.0157867
ENSMUSG00000021109	15251	Hif1a	2540.06	-0.419182	0.125494	3.34025	0.000837034	0.0157901
ENSMUSG00000040613	11810	Apobec1	212.705	-0.591976	0.17728	3.33921	0.00084016	0.0158301
ENSMUSG00000069920	97440	B3gnt9-ps	202.042	-0.559966	0.168034	3.33246	0.000860828	0.0161807
ENSMUSG00000025026	27360	Add3	3913	-0.343132	0.102989	3.33174	0.000863061	0.0161902
ENSMUSG00000043323	381668	Fbrsl1	559.053	0.551863	0.165644	-3.33163	0.000863394	0.0161902
ENSMUSG00000020154	19263	Ptprb	7477.03	-0.395609	0.118835	3.32907	0.00087137	0.0163008
ENSMUSG00000004661	56380	Arid3b	68.443	0.773626	0.23249	-3.32757	0.000876083	0.0163613
ENSMUSG00000002997	19088	Prkar2b	219.52	-0.727412	0.218614	3.32737	0.000876685	0.0163613
ENSMUSG00000036655	71693	Colec11	179.011	-0.533749	0.160436	3.32686	0.000878294	0.0163719
ENSMUSG00000025503	21351	Taldo1	1133.8	-0.428523	0.128845	3.32588	0.000881411	0.0164105
ENSMUSG00000053693	56527	Mast1	41.6628	0.822782	0.247504	-3.32432	0.000886351	0.016483
ENSMUSG00000022439	64099	Parvg	62.8511	0.728934	0.219308	-3.3238	0.000888006	0.0164942
ENSMUSG00000039405	76453	Prss23	1532.29	-0.489631	0.147351	3.32288	0.000890946	0.0165098
ENSMUSG00000040264	229898	Gbp5	335.999	0.668968	0.20144	-3.32093	0.000897184	0.0166058
ENSMUSG00000022436	20401	Sh3bp1	132.486	0.577943	0.174077	-3.32004	0.000900035	0.0166194
ENSMUSG00000021622	76722	Ckmt2	24475.9	-0.447624	0.134895	3.31831	0.000905625	0.016703
ENSMUSG00000034724	231464	Cnot6l	964.218	0.472891	0.142553	-3.31729	0.000908939	0.0167445
ENSMUSG00000071253	73132	Slc25a16	826.498	-0.460024	0.138695	3.31682	0.000910497	0.0167511
ENSMUSG00000039062	16790	Anpep	586.449	0.436807	0.131706	-3.31653	0.000911429	0.0167511
ENSMUSG00000037196	69310	Pacrg	50.3842	0.753584	0.227316	-3.31514	0.000915959	0.0167951
ENSMUSG00000026051	78896	1500015O10Rik	45.2383	-0.84934	0.256309	3.31373	0.000920615	0.0168608
ENSMUSG00000063406	73130	Tmed5	897.039	-0.659884	0.199196	3.31274	0.000923876	0.0169008
ENSMUSG00000031540	244349	Myst3	2801.77	0.502287	0.151737	-3.31023	0.000932178	0.0170131
ENSMUSG00000041720	224020	Pi4ka	3349.8	0.333656	0.100903	-3.3067	0.000944004	0.017189
ENSMUSG00000030513	18553	Pcsk6	2310.29	-0.468557	0.141934	3.30123	0.000962629	0.0174876
ENSMUSG00000030137	53857	Tuba8	2100.56	-0.622594	0.188735	3.29878	0.000971072	0.0176003
ENSMUSG00000034275	235086	Igsf9b	671.147	0.640639	0.19419	-3.29903	0.000970191	0.0176003
ENSMUSG00000024754	83921	Tmem2	3865.04	-0.640015	0.194107	3.29723	0.000976441	0.0176772
ENSMUSG00000058355	24015	Abce1	2380	-0.421172	0.127748	3.29689	0.000977609	0.017678
ENSMUSG00000021782	71228	Dlg5	534.098	0.538209	0.163311	-3.29561	0.000982086	0.0177249
ENSMUSG00000023393	228993	Slc17a9	37.2336	0.882959	0.268023	-3.29434	0.000986518	0.0177642
ENSMUSG00000022000	67302	Zc3h13	1249.28	0.39361	0.119485	-3.29423	0.000986901	0.0177642
ENSMUSG00000047420	208164	Fam180a	41.4189	-0.850358	0.25818	3.29367	0.0009889	0.0177798
ENSMUSG00000034868	67938	Myl12b	1476.01	-0.47049	0.142913	3.29213	0.0009943	0.0178361
ENSMUSG00000020607	105005	Fam84a	162.224	-0.844397	0.256732	3.28902	0.00100537	0.0180141
ENSMUSG00000002416	68198	Ndufb2	2712.6	-0.393963	0.119872	3.28654	0.00101426	0.0181528
ENSMUSG00000037788	232023	Vopp1	890.916	-0.450047	0.136964	3.28587	0.00101667	0.0181751
ENSMUSG00000032548	24059	Slco2a1	237.163	-0.667981	0.203606	3.28075	0.00103531	0.0184663
ENSMUSG00000031627	16363	Irf2	365.716	0.605963	0.184786	-3.27926	0.00104079	0.0185221
ENSMUSG00000053964	16855	Lgals4	85.2779	0.740685	0.225956	-3.278	0.00104546	0.0185841
ENSMUSG00000044617	320080	Zbtb39	467.361	0.587546	0.179353	-3.27591	0.00105321	0.0187007
ENSMUSG00000022885	20440	St6gal1	923.789	-0.565531	0.172697	3.2747	0.00105776	0.0187537
ENSMUSG00000027194	74569	Ttc17	1405.66	0.364278	0.111248	-3.27448	0.00105858	0.0187537
ENSMUSG00000051747	22138	Ttn	2.11368e+06	0.353164	0.107885	-3.27351	0.00106219	0.0187965
ENSMUSG00000021906	218885	Oxnad1	1260.59	-0.391333	0.119589	3.27232	0.00106669	0.0188336
ENSMUSG00000022438	170736	Parvb	1168.42	0.423761	0.129519	-3.27179	0.00106869	0.0188478
ENSMUSG00000018263	21388	Tbx5	4934.12	0.425713	0.130162	-3.27065	0.001073	0.0189026
ENSMUSG00000041477	319618	Dcp1b	96.0938	0.673447	0.206009	-3.26901	0.00107923	0.0189275
ENSMUSG00000031659	11513	Adcy7	1473.37	-0.569786	0.174296	3.26907	0.001079	0.0189275
ENSMUSG00000040563	235044	BC018242	70.426	0.697297	0.213279	-3.26941	0.00107772	0.0189275
ENSMUSG00000026679	71233	Enkur	159.968	-0.632631	0.193513	3.26919	0.00107857	0.0189275
ENSMUSG00000034768	217217	Asb16	12.1371	0.918454	0.281047	-3.26797	0.00108321	0.0189761
ENSMUSG00000039157	98952	Fam102a	236.364	0.606851	0.185814	-3.2659	0.00109116	0.0190728
ENSMUSG00000020836	216961	Coro6	1646.96	0.546985	0.167504	-3.2655	0.0010927	0.0190785
ENSMUSG00000041355	66256	Ssr2	905.464	-0.400062	0.122556	3.26431	0.00109732	0.0191379
ENSMUSG00000026853	12908	Crat	11219.8	-0.367001	0.112496	3.26234	0.00110495	0.0192496
ENSMUSG00000004791	18654	Pgf	180.58	-0.752958	0.230846	3.26173	0.00110735	0.0192693
ENSMUSG00000036052	56323	Dnajb5	2362.43	-0.575093	0.176332	3.26143	0.00110853	0.0192693
ENSMUSG00000046034	432940	Fam105b	504.862	-0.508862	0.156101	3.25984	0.00111476	0.0193562
ENSMUSG00000020794	67128	Ube2g1	1327.33	-0.561029	0.172151	3.25894	0.00111831	0.0193749
ENSMUSG00000061533	75216	4930534B04Rik	269.287	0.486672	0.149365	-3.25827	0.00112095	0.0193994
ENSMUSG00000041202	18782	Pla2g2d	137.106	0.674041	0.206952	-3.25699	0.00112601	0.0194656
ENSMUSG00000020949	30795	Fkbp3	1178.56	-0.478087	0.146819	3.25629	0.00112877	0.0194917
ENSMUSG00000001794	12336	Capns1	4161.46	-0.351344	0.107931	3.25527	0.00113283	0.0195405
ENSMUSG00000001175	12313	Calm1	6605.17	-0.458922	0.141	3.25476	0.0011349	0.0195546
ENSMUSG00000036438	12313	Calm2	6605.17	-0.458922	0.141	3.25476	0.0011349	0.0195546
ENSMUSG00000019370	12313	Calm3	6605.17	-0.458922	0.141	3.25476	0.0011349	0.0195546
ENSMUSG00000025855	19085	Prkar1b	36.8528	0.816206	0.251014	-3.25164	0.00114741	0.019684
ENSMUSG00000024743	54525	Syt7	1301.57	0.391943	0.120537	-3.25164	0.00114742	0.019684
ENSMUSG00000030220	11857	Arhgdib	329.801	-0.484794	0.149156	3.25026	0.001153	0.0197151
ENSMUSG00000025261	59026	Huwe1	16124.9	0.351942	0.108263	-3.25081	0.00115076	0.0197151
ENSMUSG00000029168	65254	Dpysl5	90.2928	0.760661	0.2341	-3.2493	0.0011569	0.0197603
ENSMUSG00000015597	57908	Zfp318	1268.8	0.471679	0.145259	-3.24715	0.00116565	0.0198882
ENSMUSG00000040998	114249	Npnt	61.333	-0.832368	0.25639	3.24649	0.00116837	0.0198968
ENSMUSG00000049252	94217	Lrp1b	100.279	0.691844	0.213131	-3.24611	0.00116995	0.0198968
ENSMUSG00000021556	105348	Golm1	1873.24	-0.472599	0.145659	3.24457	0.00117629	0.019983
ENSMUSG00000000058	12390	Cav2	1524.56	-0.517479	0.159653	3.24127	0.00118999	0.0201503
ENSMUSG00000068551	68910	Zfp467	294.76	0.510083	0.157361	-3.24148	0.00118913	0.0201503
ENSMUSG00000020424	71962	Gatsl3	135.335	-0.649762	0.200656	3.23819	0.00120292	0.0203255
ENSMUSG00000027547	99377	Sall4	22.1989	0.894677	0.276381	-3.23711	0.00120746	0.0203584
ENSMUSG00000061882	208908	Ccdc62	70.7902	0.66034	0.203971	-3.23742	0.00120617	0.0203584
ENSMUSG00000044676	234725	Zfp612	657.672	0.483284	0.149477	-3.23318	0.00122422	0.0206189
ENSMUSG00000026676	74186	Ccdc3	50.767	-0.827892	0.256125	3.23238	0.00122765	0.0206276
ENSMUSG00000003541	15937	Ier3	656.397	0.779883	0.241266	-3.23246	0.00122728	0.0206276
ENSMUSG00000040605	56175	Bace2	694.33	-0.553769	0.171332	3.23214	0.00122868	0.0206276
ENSMUSG00000079012	20717	Serpina3m	56.2527	0.888109	0.275162	-3.22759	0.00124838	0.020936
ENSMUSG00000040860	230872	Crocc	180.729	0.635265	0.1969	-3.22633	0.0012539	0.0209838
ENSMUSG00000022122	13618	Ednrb	960.747	-0.492729	0.152709	3.22659	0.00125276	0.0209838
ENSMUSG00000028444	12804	Cntfr	561.868	0.588485	0.182426	-3.22588	0.00125584	0.0209876
ENSMUSG00000031502	12826	Col4a1	13540.1	-0.57543	0.178391	3.22567	0.0012568	0.0209876
ENSMUSG00000067653	78321	Ankrd23	1731.05	-0.90145	0.279542	3.22474	0.00126087	0.0210332
ENSMUSG00000033763	244654	Mtss1l	782.85	0.72601	0.225161	-3.22441	0.00126234	0.0210354
ENSMUSG00000027314	54485	Dll4	400.384	0.62426	0.193698	-3.22286	0.00126918	0.0211271
ENSMUSG00000031495	170779	Cd209d	56.6583	0.794497	0.246602	-3.22178	0.00127397	0.0211844
ENSMUSG00000020186	13008	Csrp2	1141.68	-0.47387	0.147148	3.22037	0.00128026	0.0212664
ENSMUSG00000026276	18000	37500	4757.33	-0.476584	0.148214	3.2155	0.00130215	0.0216072
ENSMUSG00000020303	20856	Stc2	231.368	-0.538881	0.167653	3.21425	0.00130784	0.0216787
ENSMUSG00000040543	327958	Pitpnm3	119.188	0.692873	0.215596	-3.21375	0.00131014	0.0216939
ENSMUSG00000037458	54375	Azin1	4194.62	-0.369897	0.115162	3.21197	0.00131828	0.0218057
ENSMUSG00000054690	59308	Emcn	2907.15	-0.591596	0.184209	3.21155	0.0013202	0.0218145
ENSMUSG00000052605	67441	Isoc2b	70.6088	0.721057	0.22466	-3.20955	0.00132942	0.021933
ENSMUSG00000068606	225594	Gm4841	12.4372	0.90273	0.281278	-3.20939	0.00133016	0.021933
ENSMUSG00000021461	14088	Fancc	393.138	0.512339	0.159655	-3.20903	0.00133183	0.0219374
ENSMUSG00000020840	104184	Blmh	1150.94	-0.369385	0.115131	3.20838	0.00133484	0.0219641
ENSMUSG00000055027	12180	Smyd1	8922.57	-0.438072	0.136664	3.20546	0.00134845	0.0221648
ENSMUSG00000031613	15446	Hpgd	496.956	-0.662869	0.20683	3.2049	0.00135111	0.0221799
ENSMUSG00000033720	94282	Sfxn5	157.197	0.581432	0.181433	-3.20467	0.00135219	0.0221799
ENSMUSG00000051246	403174	A930005I04Rik	18.3925	0.893885	0.278966	-3.20428	0.001354	0.0221864
ENSMUSG00000063296	320709	Tmem117	423.877	-0.46768	0.145986	3.20359	0.00135724	0.0222164
ENSMUSG00000025730	224624	Rab40c	265.968	0.542459	0.169398	-3.20227	0.00136347	0.0222583
ENSMUSG00000025809	16412	Itgb1	16375	-0.369522	0.115422	3.20149	0.00136717	0.0222861
ENSMUSG00000071014	230075	Ndufb6	1935.5	-0.431163	0.134699	3.20094	0.00136982	0.022306
ENSMUSG00000056367	242894	Actr3b	414.95	0.462757	0.144649	-3.19918	0.00137819	0.0224192
ENSMUSG00000073838	233870	Tufm	176.746	-0.571293	0.17869	3.19712	0.00138808	0.0225102
ENSMUSG00000038156	233744	Spon1	2816.54	-0.438928	0.137346	3.19579	0.0013945	0.0225909
ENSMUSG00000014606	67863	Slc25a11	6957.45	-0.373865	0.117004	3.19533	0.00139673	0.0226038
ENSMUSG00000004896	229503	Rrnad1	256.479	0.515811	0.161462	-3.19462	0.00140016	0.0226359
ENSMUSG00000028496	70122	Mllt3	703.191	0.452872	0.141798	-3.19378	0.00140423	0.0226785
ENSMUSG00000041329	11932	Atp1b2	139.628	0.729832	0.228572	-3.19301	0.00140799	0.0227157
ENSMUSG00000026442	269116	Nfasc	17.9519	0.895475	0.280541	-3.19196	0.00141311	0.022775
ENSMUSG00000024286	67974	Ccny	3382.89	-0.399519	0.125307	3.18833	0.00143098	0.0230393
ENSMUSG00000006575	51799	Rundc3a	44.0896	0.751079	0.235655	-3.1872	0.00143659	0.0231061
ENSMUSG00000000402	54156	Egfl6	13.3438	-0.887663	0.278586	3.18632	0.00144095	0.0231524
ENSMUSG00000031782	67914	Coq9	7221.05	-0.363525	0.114134	3.18507	0.00144719	0.0232289
ENSMUSG00000030217	109978	Art4	260.686	-0.626392	0.196835	3.18232	0.001461	0.0234028
ENSMUSG00000032301	26441	Psma4	860.177	-0.460491	0.144702	3.18233	0.00146094	0.0234028
ENSMUSG00000055053	18029	Nfic	3393.88	0.586886	0.184503	-3.18089	0.00146821	0.0234705
ENSMUSG00000027712	11747	Anxa5	1822.81	-0.368697	0.11591	3.1809	0.00146819	0.0234705
ENSMUSG00000030098	243547	Grip2	407.345	0.749233	0.235729	-3.17837	0.00148108	0.0236521
ENSMUSG00000039197	11534	Adk	2694.25	-0.422606	0.132988	3.17776	0.00148416	0.0236772
ENSMUSG00000028249	53378	Sdcbp	2968.05	-0.44745	0.140867	3.1764	0.00149114	0.0237645
ENSMUSG00000063558	11761	Aox1	1385.62	0.548172	0.172617	-3.17565	0.00149502	0.0238021
ENSMUSG00000037750	216971	BC017647	447.958	0.44267	0.139459	-3.1742	0.0015025	0.0238912
ENSMUSG00000022956	28080	Atp5o	11244.6	-0.338823	0.10675	3.17398	0.00150365	0.0238912
ENSMUSG00000038954	109115	Supt3h	135.034	0.649746	0.204815	-3.17235	0.00151211	0.0239957
ENSMUSG00000050075	229323	Gpr171	36.9379	0.894016	0.281835	-3.17212	0.00151328	0.0239957
ENSMUSG00000020886	13385	Dlg4	186.102	0.54959	0.173348	-3.17044	0.00152206	0.0240863
ENSMUSG00000045980	320534	Tmem104	279.099	0.528478	0.166819	-3.16797	0.00153507	0.024219
ENSMUSG00000060862	230848	Zbtb40	505.627	0.558513	0.176298	-3.16801	0.00153489	0.024219
ENSMUSG00000027004	20378	Frzb	472.875	-0.490672	0.154995	3.16573	0.00154697	0.0243822
ENSMUSG00000070808	243842	Gltscr1	234.066	0.650964	0.205735	-3.16408	0.00155573	0.0244958
ENSMUSG00000023055	67488	Calcoco1	2265.13	0.652051	0.206234	-3.1617	0.00156851	0.0246723
ENSMUSG00000016319	11740	Slc25a5	1812.51	-0.4039	0.127807	3.16023	0.00157643	0.024772
ENSMUSG00000002233	11853	Rhoc	1028.46	-0.54144	0.171468	3.15768	0.00159029	0.0249649
ENSMUSG00000024395	225341	Lims2	3015.99	-0.614366	0.194715	3.15521	0.00160381	0.025152
ENSMUSG00000033590	208943	Myo5c	95.8743	0.78836	0.249968	-3.15384	0.00161138	0.0252348
ENSMUSG00000001349	12797	Cnn1	102.553	-0.831674	0.263737	3.15341	0.00161372	0.0252348
ENSMUSG00000001494	74499	Sost	54.5215	-0.887631	0.281486	3.15338	0.00161391	0.0252348
ENSMUSG00000034842	109979	Art3	10112.8	-0.530617	0.168434	3.15029	0.0016311	0.0254782
ENSMUSG00000032403	69478	2300009A05Rik	127.728	-0.608665	0.193236	3.14985	0.00163353	0.0254886
ENSMUSG00000074218	12865	Cox7a1	12753.8	-0.487399	0.15475	3.14959	0.00163501	0.0254886
ENSMUSG00000038346	269800	Zfp384	351.701	0.53677	0.170452	-3.1491	0.00163775	0.0255061
ENSMUSG00000036087	75991	Slain2	5609.01	-0.441471	0.14029	3.14684	0.00165043	0.0256527
ENSMUSG00000023052	54615	Npff	38.8621	0.777896	0.247317	-3.14534	0.00165892	0.0257592
ENSMUSG00000033032	106877	Afap1l1	3689.68	-0.393078	0.125065	3.143	0.00167225	0.0259209
ENSMUSG00000024109	18189	Nrxn1	70.6793	-0.768892	0.244697	3.14221	0.00167675	0.0259591
ENSMUSG00000045114	69017	Prrt2	46.8767	0.830031	0.264291	-3.1406	0.00168605	0.026032
ENSMUSG00000031963	73230	Bmper	151.468	-0.797905	0.254058	3.14064	0.00168579	0.026032
ENSMUSG00000040550	72201	Otud6b	983.336	-0.408213	0.129982	3.14053	0.00168643	0.026032
ENSMUSG00000079018	17067	Ly6c1	891.527	-0.51322	0.163541	3.13817	0.00170008	0.0262169
ENSMUSG00000037143	100503181	4930529M08Rik	24.3548	0.838015	0.267226	-3.13597	0.00171284	0.0263196
ENSMUSG00000031422	56397	Morf4l2	1624	-0.349264	0.111377	3.13587	0.00171344	0.0263196
ENSMUSG00000025586	12877	Cpeb1	554.214	0.512875	0.163532	-3.13623	0.00171137	0.0263196
ENSMUSG00000019647	20358	Sema6a	517.699	0.485412	0.154828	-3.13516	0.00171759	0.0263577
ENSMUSG00000002332	52585	Dhrs1	615.561	-0.382483	0.122019	3.13463	0.00172072	0.02638
ENSMUSG00000007415	67210	Gatad1	1569.12	-0.386564	0.123351	3.13386	0.00172524	0.0264234
ENSMUSG00000030768	68897	Disp1	414.898	0.454665	0.145132	-3.13277	0.00173168	0.0264962
ENSMUSG00000041949	272538	Tmco7	510.136	0.429495	0.137174	-3.13102	0.00174201	0.0266284
ENSMUSG00000060002	212862	Chpt1	8867.06	-0.444977	0.142287	3.12732	0.00176405	0.0269129
ENSMUSG00000030091	54563	Nup210	220.823	0.55453	0.177316	-3.12736	0.00176382	0.0269129
ENSMUSG00000039523	230967	BC046331	1035.19	0.475923	0.152203	-3.12689	0.00176664	0.0269262
ENSMUSG00000032526	26901	Deb1	1111.86	-0.41559	0.132967	3.1255	0.00177501	0.0270277
ENSMUSG00000005886	17978	Ncoa2	2759.5	0.434468	0.139031	-3.12498	0.0017782	0.0270499
ENSMUSG00000027210	17536	Meis2	736.292	0.371171	0.118808	-3.12413	0.0017833	0.0271013
ENSMUSG00000041073	192950	Nacad	619.296	0.621345	0.198949	-3.12313	0.0017894	0.0271352
ENSMUSG00000019929	13179	Dcn	35629.4	-0.579145	0.185426	3.12333	0.00178817	0.0271352
ENSMUSG00000020793	14428	Galr2	11.5242	0.88025	0.281868	-3.12291	0.00179071	0.0271352
ENSMUSG00000038167	213522	Plekhg6	57.9161	0.823001	0.263691	-3.12108	0.00180189	0.027252
ENSMUSG00000036391	77371	Sec24a	1067.49	0.482693	0.154734	-3.11949	0.00181164	0.0273265
ENSMUSG00000041737	235135	Tmem45b	14.0752	-0.839812	0.269217	3.11947	0.00181179	0.0273265
ENSMUSG00000048191	353328	Muc6	24.4314	0.865991	0.277612	-3.11943	0.00181203	0.0273265
ENSMUSG00000006699	12540	Cdc42	4411.85	-0.456064	0.146246	3.11847	0.00181792	0.0273709
ENSMUSG00000006057	11951	Atp5g1	683.66	-0.421396	0.135164	3.11766	0.00182291	0.0274049
ENSMUSG00000031703	71927	Itfg1	2380.67	-0.478693	0.153561	3.11729	0.00182524	0.0274049
ENSMUSG00000078853	16145	Igtp	290.462	0.798602	0.256204	-3.11705	0.00182668	0.0274049
ENSMUSG00000001334	384061	Fndc5	11132.8	-0.354608	0.11377	3.11689	0.00182769	0.0274049
ENSMUSG00000005510	68349	Ndufs3	1423.11	-0.383336	0.123018	3.11611	0.00183256	0.0274123
ENSMUSG00000041164	52915	Zmiz2	668.634	0.550729	0.176749	-3.11588	0.00183397	0.0274123
ENSMUSG00000063663	382236	Brwd3	490.037	0.472931	0.15179	-3.11569	0.00183516	0.0274123
ENSMUSG00000034353	51801	Ramp1	387.74	-0.542834	0.174192	3.11631	0.00183131	0.0274123
ENSMUSG00000038128	12326	Camk4	74.4078	-0.7574	0.243125	3.11528	0.00183773	0.0274246
ENSMUSG00000031309	110651	Rps6ka3	967.965	0.471301	0.151338	-3.11422	0.0018443	0.0274965
ENSMUSG00000033565	93686	Rbfox2	4168.9	0.316056	0.101598	-3.11084	0.00186553	0.0277564
ENSMUSG00000023050	26404	Map3k12	261.587	0.491389	0.157972	-3.11061	0.00186703	0.0277564
ENSMUSG00000061731	14042	Ext1	1602.06	-0.398508	0.12824	3.10751	0.00188671	0.0280225
ENSMUSG00000027204	14118	Fbn1	5649.19	-0.628012	0.202141	3.1068	0.00189122	0.0280629
ENSMUSG00000031965	57246	Tbx20	7331.64	0.489872	0.157731	-3.10575	0.00189799	0.0281368
ENSMUSG00000032185	59035	Carm1	1289.29	0.484589	0.156062	-3.10512	0.00190205	0.0281704
ENSMUSG00000033540	15932	Idua	557.526	0.426181	0.137279	-3.1045	0.00190604	0.0282029
ENSMUSG00000063382	80288	Bcl9l	901.715	0.727086	0.234418	-3.10166	0.00192438	0.0284208
ENSMUSG00000037426	277854	Depdc5	926.912	0.370418	0.119463	-3.10068	0.00193074	0.028488
ENSMUSG00000024143	104215	Rhoq	4765.79	-0.420803	0.135743	3.1	0.00193521	0.0285271
ENSMUSG00000022337	66736	Ttc35	1923.92	-0.42038	0.135632	3.09942	0.00193899	0.0285293
ENSMUSG00000039477	231861	Tnrc18	2372.19	0.643792	0.207711	-3.09946	0.00193873	0.0285293
ENSMUSG00000069171	13865	Nr2f1	229.618	0.484893	0.156511	-3.09815	0.00194734	0.0285986
ENSMUSG00000032580	83486	Rbm5	1974.8	0.417155	0.134675	-3.09749	0.00195167	0.0286087
ENSMUSG00000068854	319190	Hist2h2be	212.03	-0.536821	0.17337	3.09638	0.00195898	0.0286892
ENSMUSG00000054477	140492	Kcnn2	111.059	0.607513	0.196317	-3.09455	0.0019711	0.0288398
ENSMUSG00000050107	14841	Gsg2	10.4263	-0.868309	0.280623	3.09422	0.00197332	0.0288453
ENSMUSG00000025488	12869	Cox8b	5801.75	-0.417565	0.134988	3.09336	0.00197907	0.0289025
ENSMUSG00000037852	12876	Cpe	10564.9	-0.365915	0.118383	3.09094	0.00199526	0.0290849
ENSMUSG00000026564	240892	Dusp27	1928.89	-0.523088	0.169297	3.08977	0.00200314	0.0291675
ENSMUSG00000020585	17775	Laptm4a	8840.85	-0.376501	0.121863	3.08954	0.00200464	0.0291675
ENSMUSG00000071669	74478	Snx29	376.85	0.486499	0.157501	-3.08887	0.00200922	0.0292071
ENSMUSG00000018770	228033	Atp5g3	13131.8	-0.395338	0.128006	3.08843	0.00201216	0.0292228
ENSMUSG00000042800	76925	1700015E13Rik	17.1699	0.861324	0.279192	-3.08506	0.00203514	0.0295292
ENSMUSG00000006818	20656	Sod2	8927.48	-0.345951	0.112152	3.08468	0.00203773	0.0295396
ENSMUSG00000042814	66405	Mcts2	156.591	-0.550749	0.178609	3.08354	0.00204557	0.0296258
ENSMUSG00000037071	20249	Scd1	4865.82	-0.85397	0.276996	3.08297	0.00204947	0.029655
ENSMUSG00000020728	76380	Ccdc46	160.028	0.551328	0.178884	-3.08205	0.00205582	0.0297195
ENSMUSG00000023075	68050	Akirin1	432.93	-0.403217	0.130848	3.08157	0.00205913	0.02974
ENSMUSG00000024589	83814	Nedd4l	1857.34	0.511082	0.165902	-3.08063	0.00206565	0.0298068
ENSMUSG00000028708	17346	Mknk1	508.954	0.379347	0.123204	-3.07903	0.00207675	0.0299395
ENSMUSG00000033257	67534	Ttll4	539.483	0.399883	0.129956	-3.07707	0.00209044	0.0301092
ENSMUSG00000028476	53614	Reck	809.678	-0.438417	0.142573	3.07503	0.00210481	0.0302885
ENSMUSG00000024353	69816	2010001M09Rik	50.8066	0.800094	0.260385	-3.07274	0.00212105	0.0304663
ENSMUSG00000025650	12836	Col7a1	35.5233	0.844349	0.274878	-3.07173	0.00212824	0.0305418
ENSMUSG00000017453	19193	Pipox	14.8316	0.86563	0.281877	-3.07095	0.0021338	0.0305645
ENSMUSG00000038403	69585	Hfe2	4125.66	-0.41868	0.136347	3.07069	0.00213566	0.0305645
ENSMUSG00000001383	66492	Zmat2	771.086	-0.394927	0.12859	3.07121	0.00213192	0.0305645
ENSMUSG00000049687	338368	Fam109b	96.0381	-0.593275	0.19335	3.06839	0.00215213	0.0307364
ENSMUSG00000090946	72123	2010109K11Rik	553.145	-0.416274	0.135674	3.0682	0.00215354	0.0307364
ENSMUSG00000036466	214058	Megf11	206.432	0.611356	0.199225	-3.06866	0.00215018	0.0307364
ENSMUSG00000037143	78774	4930529M08Rik	80.5107	0.657431	0.214374	-3.06675	0.00216398	0.0307736
ENSMUSG00000017897	14049	Eya2	39.7834	-0.847717	0.276417	3.0668	0.00216361	0.0307736
ENSMUSG00000026864	14828	Hspa5	15788.2	-0.363891	0.118655	3.06681	0.00216359	0.0307736
ENSMUSG00000029298	236573	Gbp9	474.337	0.481631	0.157065	-3.06645	0.00216618	0.0307769
ENSMUSG00000028053	192195	Ash1l	6737.92	0.428043	0.139693	-3.06416	0.00218282	0.0309758
ENSMUSG00000028982	70556	Slc25a33	543.175	-0.556021	0.18147	3.06398	0.00218411	0.0309758
ENSMUSG00000042985	100647	Upk3b	2367.11	-0.615906	0.201041	3.06358	0.00218703	0.0309891
ENSMUSG00000026980	17076	Ly75	85.2477	0.713154	0.233025	-3.06042	0.00221026	0.0312901
ENSMUSG00000049823	193736	Zbtb12	94.4524	0.669744	0.218933	-3.05912	0.00221985	0.0313976
ENSMUSG00000030000	11519	Add2	96.9661	-0.750245	0.245369	3.05761	0.00223108	0.031528
ENSMUSG00000040163	73344	1700034J05Rik	35.7253	0.754	0.246645	-3.05703	0.00223542	0.031561
ENSMUSG00000031521	11593	Aga	564.224	-0.436724	0.142898	3.05619	0.00224169	0.0316211
ENSMUSG00000056947	17116	Mab21l1	38.9674	0.806459	0.263922	-3.05568	0.00224553	0.0316469
ENSMUSG00000074736	433485	Tmem90b	9.32566	-0.82191	0.269195	3.05321	0.00226404	0.0318791
ENSMUSG00000034820	269061	Cpsf7	962.518	0.36102	0.118267	-3.0526	0.00226872	0.0319164
ENSMUSG00000028609	17149	Magoh	377.325	-0.412492	0.135144	3.05223	0.00227144	0.0319262
ENSMUSG00000004460	67838	Dnajb11	1501.17	-0.339413	0.111299	3.04956	0.00229177	0.0321596
ENSMUSG00000066279	504186	Chrna10	255.225	0.656958	0.215431	-3.04951	0.00229214	0.0321596
ENSMUSG00000039048	235169	Foxred1	1435.6	-0.380183	0.124754	3.04745	0.00230791	0.0323519
ENSMUSG00000038212	66631	Hiatl1	824.377	-0.392444	0.128796	3.04703	0.00231116	0.0323686
ENSMUSG00000054206	16904	Gzmm	96.4619	0.693448	0.227658	-3.046	0.00231905	0.0324214
ENSMUSG00000039699	74481	Batf2	18.5056	0.854278	0.28051	-3.04545	0.00232334	0.0324525
ENSMUSG00000040282	399568	BC052040	50.3231	0.690032	0.226635	-3.04468	0.00232929	0.0325066
ENSMUSG00000033004	105689	Mycbp2	6099.31	0.358467	0.117755	-3.04418	0.00233314	0.0325315
ENSMUSG00000025997	22779	Ikzf2	420.043	0.466103	0.153171	-3.04302	0.00234219	0.0326287
ENSMUSG00000007035	17687	Msh5	26.9726	0.826432	0.271736	-3.04131	0.00235555	0.0326852
ENSMUSG00000035852	78906	9130017N09Rik	33.8649	0.856956	0.281784	-3.04118	0.0023565	0.0326852
ENSMUSG00000055296	242474	D730040F13Rik	2636.25	0.384449	0.126404	-3.04142	0.00235463	0.0326852
ENSMUSG00000071847	494504	Apcdd1	163.342	-0.589386	0.193803	3.04117	0.00235664	0.0326852
ENSMUSG00000001119	12833	Col6a1	2879.03	-0.528354	0.173816	3.03973	0.00236788	0.0327831
ENSMUSG00000025658	245684	Cnksr2	114.98	-0.747282	0.24595	3.03835	0.00237875	0.0329047
ENSMUSG00000004633	69993	Chn2	152.119	-0.543208	0.178861	3.03704	0.00238912	0.03299
ENSMUSG00000024072	67864	Yipf4	1023.04	-0.416661	0.137254	3.0357	0.0023998	0.0330503
ENSMUSG00000030257	259302	Srgap3	76.9118	0.648339	0.213551	-3.03599	0.00239748	0.0330503
ENSMUSG00000020048	22027	Hsp90b1	12261.4	-0.341612	0.112551	3.03518	0.00240389	0.0330542
ENSMUSG00000029669	269831	Tspan12	1033.58	-0.621146	0.204652	3.03513	0.00240428	0.0330542
ENSMUSG00000061462	380698	Obscn	73636.7	0.580017	0.191138	-3.03455	0.00240896	0.0330719
ENSMUSG00000044317	319197	Gpr4	153.275	0.635248	0.209346	-3.03445	0.00240978	0.0330719
ENSMUSG00000058587	50875	Tmod3	2276.5	-0.438155	0.144458	3.03309	0.00242061	0.0331915
ENSMUSG00000026260	67273	Ndufa10	8378.03	-0.367136	0.121174	3.02982	0.00244696	0.0335235
ENSMUSG00000002100	17868	Mybpc3	44335.3	-0.471988	0.155879	3.02792	0.00246244	0.0337063
ENSMUSG00000001911	18032	Nfix	1906.45	0.4339	0.143417	-3.02544	0.00248274	0.0339251
ENSMUSG00000057229	66349	Atp5sl	1107.79	-0.378032	0.124948	3.02552	0.0024821	0.0339251
ENSMUSG00000001017	66511	2500003M10Rik	1805.95	-0.34195	0.113058	3.02455	0.00249007	0.0339956
ENSMUSG00000001052	99683	Sec24b	1108.04	0.437763	0.144756	-3.02414	0.00249339	0.0340114
ENSMUSG00000055254	18212	Ntrk2	39.6654	-0.798533	0.264111	3.02347	0.00249894	0.0340575
ENSMUSG00000026159	15463	Agfg1	1596.03	-0.352336	0.116632	3.02093	0.00251996	0.0342549
ENSMUSG00000013936	17906	Myl2	21.8056	-0.84658	0.280215	3.02118	0.00251788	0.0342549
ENSMUSG00000028369	64817	Svep1	3104.98	-0.527046	0.174497	3.02038	0.00252461	0.0342885
ENSMUSG00000043102	227717	Qrfp	14.2505	0.850376	0.281605	-3.01975	0.00252988	0.0343303
ENSMUSG00000079436	100040591	Kcnj13	44.3897	0.750138	0.248469	-3.01904	0.00253578	0.0343737
ENSMUSG00000002602	26362	Axl	7872.13	-0.49958	0.165487	3.01884	0.00253745	0.0343737
ENSMUSG00000035299	17318	Mid1	112.98	0.59305	0.19647	-3.01852	0.00254012	0.0343802
ENSMUSG00000029330	74596	Cds1	106.447	0.5658	0.187468	-3.01811	0.00254357	0.0343814
ENSMUSG00000037652	241915	Phc3	2315.1	0.357354	0.118408	-3.01799	0.00254458	0.0343814
ENSMUSG00000033730	13655	Egr3	110.422	0.698907	0.231667	-3.01686	0.00255409	0.0344803
ENSMUSG00000030787	114332	Lyve1	2190.61	-0.706537	0.23428	3.01577	0.00256324	0.034574
ENSMUSG00000027936	74343	Crtc2	194.632	0.623212	0.206777	-3.01394	0.00257879	0.0347539
ENSMUSG00000030647	68197	Ndufc2	2175.52	-0.498229	0.165347	3.01323	0.0025848	0.0348051
ENSMUSG00000015112	50799	Slc25a13	2330.76	-0.380189	0.126233	3.01181	0.00259699	0.0349094
ENSMUSG00000035686	21835	Thrsp	292.808	-0.686521	0.227966	3.0115	0.00259961	0.0349147
ENSMUSG00000039850	338371	A730011L01Rik	225.75	0.515151	0.171121	-3.01045	0.00260863	0.035006
ENSMUSG00000035674	66091	Ndufa3	3274.57	-0.399089	0.132611	3.00947	0.00261701	0.0350586
ENSMUSG00000050195	329065	Scd4	78.3784	-0.834308	0.277392	3.00768	0.00263248	0.0351766
ENSMUSG00000023456	21991	Tpi1	6735.4	-0.37008	0.123042	3.00775	0.00263187	0.0351766
ENSMUSG00000041134	224405	Cyyr1	156.798	0.592295	0.196928	-3.00768	0.00263254	0.0351766
ENSMUSG00000021796	12166	Bmpr1a	5065.12	-0.384508	0.127902	3.00627	0.0026447	0.0353091
ENSMUSG00000034120	20382	Srsf2	1634.63	-0.345304	0.114875	3.00591	0.00264784	0.0353211
ENSMUSG00000093603	20382	Srsf2	1634.63	-0.345304	0.114875	3.00591	0.00264784	0.0353211
ENSMUSG00000051650	53625	B3gnt2	610.947	-0.439068	0.146083	3.0056	0.00265054	0.0353215
ENSMUSG00000037847	225994	BC016495	98.9413	0.549537	0.18285	-3.00539	0.00265237	0.0353215
ENSMUSG00000024098	65960	Twsg1	3377.72	-0.384892	0.128136	3.00378	0.00266647	0.0354491
ENSMUSG00000024507	15488	Hsd17b4	2391.59	-0.346084	0.115211	3.00391	0.00266536	0.0354491
ENSMUSG00000043067	244745	Dpy19l1	606.994	-0.4403	0.146684	3.0017	0.00268474	0.0356317
ENSMUSG00000046667	72397	Rbm12b	155.095	0.535482	0.178437	-3.00096	0.00269131	0.0356888
ENSMUSG00000090693	666731	Trim43c	20.7911	0.83243	0.277513	-2.99961	0.00270328	0.0358173
ENSMUSG00000040712	216874	Camta2	936.947	0.488655	0.163032	-2.9973	0.00272382	0.036059
ENSMUSG00000025959	93691	Klf7	311.128	0.608033	0.202958	-2.99585	0.00273677	0.0362
ENSMUSG00000042308	233904	Setd1a	595.568	0.53201	0.177629	-2.99506	0.00274393	0.036264
ENSMUSG00000042203	381085	Tbc1d22b	322.29	0.462331	0.154378	-2.9948	0.00274623	0.036264
ENSMUSG00000021253	21809	Tgfb3	1878.76	-0.433057	0.144617	2.99451	0.00274886	0.0362683
ENSMUSG00000028044	54124	Cks1b	49.9059	-0.690156	0.230497	2.99421	0.0027516	0.0362741
ENSMUSG00000029103	16976	Lrpap1	2160.41	-0.353124	0.118041	2.99153	0.0027758	0.0364215
ENSMUSG00000030352	109246	Tspan9	2518.95	-0.495792	0.165697	2.99215	0.00277018	0.0364215
ENSMUSG00000026701	11758	Prdx6	2887.2	-0.324412	0.108408	2.99251	0.00276695	0.0364215
ENSMUSG00000032097	13209	Ddx6	4654.37	0.416206	0.13913	-2.99149	0.00277618	0.0364215
ENSMUSG00000028919	213649	Arhgef19	214.373	0.680096	0.227328	-2.9917	0.00277428	0.0364215
ENSMUSG00000039004	12161	Bmp6	899.907	-0.61755	0.206439	2.99143	0.0027767	0.0364215
ENSMUSG00000029165	231093	Agbl5	221.237	0.544419	0.18202	-2.99099	0.00278074	0.0364441
ENSMUSG00000032047	110446	Acat1	11095.2	-0.320349	0.107145	2.98985	0.0027911	0.0365495
ENSMUSG00000022518	78809	4930562C15Rik	26.9232	0.833178	0.278703	-2.98948	0.00279451	0.0365561
ENSMUSG00000093500	78809	RP23-354F11.3	26.9232	0.833178	0.278703	-2.98948	0.00279451	0.0365561
ENSMUSG00000046280	214547	She	889.893	-0.413194	0.138225	2.98929	0.00279626	0.0365561
ENSMUSG00000025231	24069	Sufu	142.778	0.618535	0.206957	-2.98871	0.00280154	0.0365947
ENSMUSG00000046603	382117	D9Ertd402e	1319.88	-0.445817	0.149216	2.98773	0.00281059	0.0366606
ENSMUSG00000005465	50931	Il27ra	174.587	-0.639096	0.213912	2.98766	0.00281125	0.0366606
ENSMUSG00000037104	56468	Socs5	1143.03	0.367617	0.123085	-2.98669	0.00282016	0.0367339
ENSMUSG00000004698	79221	Hdac9	798.655	0.522192	0.174849	-2.98654	0.00282155	0.0367339
ENSMUSG00000026664	16922	Phyh	5010.18	-0.351347	0.117682	2.98558	0.00283045	0.0367888
ENSMUSG00000019087	54411	Atp6ap1	3619.26	-0.328171	0.109917	2.98562	0.00283005	0.0367888
ENSMUSG00000028943	56226	Espn	133.355	0.635873	0.213077	-2.98424	0.00284282	0.0369191
ENSMUSG00000031618	110784	Nr3c2	1420.05	0.487956	0.163572	-2.98313	0.00285317	0.0369967
ENSMUSG00000031523	50768	Dlc1	6381.12	0.47392	0.158869	-2.98309	0.0028535	0.0369967
ENSMUSG00000037098	215445	Rab11fip3	1258.85	0.471197	0.157997	-2.98231	0.00286082	0.0369999
ENSMUSG00000058076	66052	Sdhc	8616.44	-0.338578	0.113522	2.98248	0.00285924	0.0369999
ENSMUSG00000026525	13603	Opn3	110.164	-0.609936	0.204496	2.98263	0.00285782	0.0369999
ENSMUSG00000017493	16010	Igfbp4	7194.12	-0.366844	0.123142	2.97904	0.0028915	0.037366
ENSMUSG00000033671	74081	Cep350	3424.18	0.401372	0.13486	-2.97622	0.00291828	0.0376501
ENSMUSG00000024922	18426	Ovol1	15.7674	0.838284	0.281731	-2.97547	0.00292539	0.0377108
ENSMUSG00000031950	93739	Gabarapl2	185.52	-0.536023	0.18024	2.97394	0.00294	0.0378681
ENSMUSG00000027663	22401	Zmat3	465.758	0.432454	0.145478	-2.97264	0.00295252	0.0379983
ENSMUSG00000003476	12922	Crhr2	652.959	0.50515	0.169948	-2.97238	0.00295502	0.0379993
ENSMUSG00000031111	209268	Igsf1	999.836	-0.704087	0.236925	2.97177	0.00296086	0.0380433
ENSMUSG00000025701	11689	Alox5	375.907	-0.586658	0.197543	2.96978	0.00298016	0.0381976
ENSMUSG00000037742	13627	Eef1a1	12482.8	-0.327715	0.11034	2.97004	0.00297764	0.0381976
ENSMUSG00000040327	78309	Cul9	1420.09	0.490235	0.165062	-2.97	0.00297796	0.0381976
ENSMUSG00000004187	16581	Kifc2	144.375	0.535458	0.180382	-2.96848	0.0029928	0.0383284
ENSMUSG00000026944	11305	Abca2	2396.9	0.435179	0.14667	-2.96706	0.00300664	0.0384429
ENSMUSG00000026407	12292	Cacna1s	136.582	0.555405	0.187253	-2.96607	0.00301631	0.0385352
ENSMUSG00000075419	227697	Dolk	569.574	-0.482331	0.162693	2.96466	0.00303013	0.03866
ENSMUSG00000036218	239618	Pdzrn4	390.278	0.559648	0.188794	-2.96433	0.00303346	0.03866
ENSMUSG00000047996	546336	Prrg1	439.854	-0.634101	0.214058	2.96229	0.00305362	0.0388854
ENSMUSG00000038058	107607	Nod1	1132.77	0.372333	0.125757	-2.96074	0.00306899	0.0390495
ENSMUSG00000037242	29876	Clic4	13546.8	-0.370414	0.125141	2.95998	0.0030766	0.0391146
ENSMUSG00000028098	67845	Rnf115	535.972	-0.45877	0.155015	2.95951	0.00308127	0.0391424
ENSMUSG00000028995	84652	Fam126a	2210.96	0.372284	0.12581	-2.9591	0.00308536	0.0391626
ENSMUSG00000036781	67941	Rps27l	533.156	-0.499691	0.168911	2.95831	0.00309327	0.0391681
ENSMUSG00000022401	321003	Xpnpep3	305.249	0.462806	0.156423	-2.95868	0.00308961	0.0391681
ENSMUSG00000044172	68509	Ptx4	41.2007	-0.775372	0.262098	2.95833	0.0030931	0.0391681
ENSMUSG00000067261	15221	Foxd3	18.0711	-0.83205	0.281321	2.95766	0.00309984	0.0391997
ENSMUSG00000020477	64660	Mrps24	1010.02	-0.367811	0.124484	2.95468	0.00312997	0.0395373
ENSMUSG00000024352	71242	Spata24	91.1148	0.588523	0.199229	-2.95401	0.00313674	0.039591
ENSMUSG00000002578	22781	Ikzf4	26.3255	0.831574	0.281564	-2.95341	0.00314282	0.0396358
ENSMUSG00000024712	54391	Rfk	1114.17	-0.407449	0.137975	2.95306	0.00314638	0.0396489
ENSMUSG00000039286	72007	Fndc3b	5300.69	-0.331241	0.112218	2.95178	0.00315953	0.0397827
ENSMUSG00000017417	72324	Plxdc1	68.5644	0.716689	0.242904	-2.95051	0.00317253	0.0398826
ENSMUSG00000026655	66540	Fam107b	299.547	-0.47575	0.161298	2.94952	0.0031827	0.0399146
ENSMUSG00000036698	239528	Eif2c2	2114.04	0.409804	0.138919	-2.94995	0.00317828	0.0399146
ENSMUSG00000044894	22272	Uqcrq	3639.4	-0.433527	0.146971	2.94974	0.0031804	0.0399146
ENSMUSG00000048040	76219	Arxes2	6.96283	-0.787845	0.267184	2.9487	0.00319115	0.0399887
ENSMUSG00000048355	76219	Arxes1	6.96283	-0.787845	0.267184	2.9487	0.00319115	0.0399887
ENSMUSG00000021699	238871	Pde4d	2456.32	0.396448	0.134499	-2.94759	0.00320263	0.0401006
ENSMUSG00000018796	14081	Acsl1	17230.6	-0.442358	0.150127	2.94657	0.00321322	0.0401853
ENSMUSG00000033948	74464	Zswim5	46.2039	0.733886	0.249075	-2.94644	0.00321452	0.0401853
ENSMUSG00000052496	18766	Pkdrej	276.071	0.483067	0.164067	-2.94432	0.00323666	0.0402989
ENSMUSG00000078922	100039796	Tgtp1	36.389	0.83018	0.281901	-2.94494	0.00323022	0.0402989
ENSMUSG00000078921	100039796	Tgtp2	36.389	0.83018	0.281901	-2.94494	0.00323022	0.0402989
ENSMUSG00000056632	13512	Dsg3	6.58408	0.780685	0.265152	-2.94429	0.00323695	0.0402989
ENSMUSG00000027803	97064	Wwtr1	4110.55	-0.360112	0.122317	2.9441	0.00323899	0.0402989
ENSMUSG00000054766	56086	Set	534.111	-0.42141	0.143201	2.94279	0.00325267	0.0404371
ENSMUSG00000033794	70902	Lpcat2b	6.50182	0.781598	0.265625	-2.94249	0.00325588	0.040445
ENSMUSG00000021257	68737	Angel1	113.862	0.526994	0.179256	-2.93989	0.00328329	0.0407532
ENSMUSG00000022211	268747	Lrrc16b	57.2187	0.643173	0.218825	-2.93921	0.00329045	0.0408099
ENSMUSG00000030002	72102	Dusp11	1562.09	0.328923	0.111943	-2.9383	0.00330021	0.0408987
ENSMUSG00000029158	75581	Yipf7	1269.79	-0.470311	0.160078	2.938	0.00330332	0.040905
ENSMUSG00000025350	19682	Rdh5	73.35	0.593515	0.202043	-2.93757	0.00330793	0.0409298
ENSMUSG00000030804	27973	Vkorc1	350.287	-0.465303	0.158436	2.93686	0.00331558	0.0409921
ENSMUSG00000042821	20613	Snai1	51.4223	0.826183	0.281494	-2.93499	0.00333554	0.0412065
ENSMUSG00000032842	224814	Abcc10	291.828	0.586598	0.19993	-2.93402	0.003346	0.0413033
ENSMUSG00000079051	668894	Gm14025	26.8698	0.822876	0.2805	-2.93361	0.00335049	0.0413262
ENSMUSG00000018565	54351	Rai12	768.693	-0.364349	0.124227	2.93292	0.00335789	0.0413851
ENSMUSG00000040690	107581	Col16a1	748.513	-0.508269	0.173342	2.93218	0.00336591	0.0414396
ENSMUSG00000061689	228836	Dlgap4	777.389	0.520395	0.177576	-2.93055	0.00338366	0.0416047
ENSMUSG00000008475	67771	Arpc5	732.782	-0.442786	0.151152	2.9294	0.00339621	0.0416932
ENSMUSG00000038777	20360	Sema6c	620.002	0.485597	0.165774	-2.92927	0.00339764	0.0416932
ENSMUSG00000063273	74838	Naa15	2605.2	0.403221	0.137658	-2.92916	0.00339882	0.0416932
ENSMUSG00000059602	27204	Syn3	139.015	0.519704	0.177562	-2.92688	0.00342377	0.0419373
ENSMUSG00000021390	18295	Ogn	3793.05	-0.670593	0.229117	2.92686	0.00342405	0.0419373
ENSMUSG00000042138	235184	BC024479	230.943	0.472629	0.161523	-2.92608	0.00343257	0.0420089
ENSMUSG00000038583	18821	Pln	65569.5	-0.522718	0.178664	2.9257	0.00343681	0.042028
ENSMUSG00000030030	71837	1700003E16Rik	36.6595	0.716295	0.244914	-2.92467	0.00344817	0.0421342
ENSMUSG00000014837	74356	4931428F04Rik	38.2111	0.75382	0.257877	-2.92318	0.00346478	0.0423043
ENSMUSG00000061815	435626	Rufy4	89.8337	0.617362	0.211236	-2.92262	0.00347101	0.0423146
ENSMUSG00000049796	12918	Crh	11.0018	0.800737	0.273978	-2.92263	0.00347088	0.0423146
ENSMUSG00000036372	69038	1810006K21Rik	759.161	-0.414527	0.141858	2.92212	0.0034766	0.0423499
ENSMUSG00000020072	68371	Pbld1	13.553	0.818402	0.280127	-2.92154	0.00348305	0.0423956
ENSMUSG00000026437	18557	Cdk18	141.61	0.585514	0.200443	-2.92111	0.00348792	0.0424219
ENSMUSG00000031617	234463	Tmem184c	906.327	-0.487682	0.166984	2.92053	0.00349437	0.0424348
ENSMUSG00000024193	21652	Phf1	514.605	0.498827	0.170788	-2.92074	0.00349204	0.0424348
ENSMUSG00000029840	14489	Mtpn	2032.99	-0.40706	0.139423	2.91962	0.00350463	0.0425265
ENSMUSG00000031799	326618	Tpm4	2475.49	-0.490923	0.168311	2.91677	0.00353682	0.0427849
ENSMUSG00000046671	76824	Fam54b	4075.16	-0.348747	0.119549	2.91719	0.00353203	0.0427849
ENSMUSG00000064345	17717	mt-Nd2	23869.7	0.545916	0.187165	-2.91677	0.00353681	0.0427849
ENSMUSG00000057841	621697	Rpl32	7.63108	0.786718	0.269861	-2.91527	0.00355377	0.0429256
ENSMUSG00000026880	13830	Stom	3007.87	-0.337714	0.115843	2.91526	0.00355391	0.0429256
ENSMUSG00000016194	15483	Hsd11b1	228.043	-0.71853	0.246707	2.91248	0.00358568	0.0432761
ENSMUSG00000006435	18011	Neurl1a	93.086	0.614563	0.211087	-2.91142	0.00359792	0.0433239
ENSMUSG00000039262	227723	Prrc2b	7672.53	0.422456	0.145103	-2.91143	0.00359778	0.0433239
ENSMUSG00000032308	71742	Ulk3	159.982	0.562534	0.193186	-2.91188	0.00359262	0.0433239
ENSMUSG00000020717	18613	Pecam1	11642.6	-0.627489	0.215557	2.91101	0.00360266	0.0433477
ENSMUSG00000067158	12829	Col4a4	947.087	-0.434731	0.149431	2.90924	0.00362311	0.0435272
ENSMUSG00000020681	11421	Ace	3073.98	-0.598721	0.205791	2.90937	0.00362158	0.0435272
ENSMUSG00000046982	110796	Tshz1	1833.3	-0.324985	0.111722	2.90886	0.0036275	0.0435466
ENSMUSG00000028639	22608	Ybx1	4845.35	-0.306565	0.105437	2.90756	0.00364256	0.0436941
ENSMUSG00000028127	19299	Abcd3	2820.11	-0.376052	0.12942	2.90566	0.00366478	0.0438838
ENSMUSG00000042353	333315	Frem3	36.671	-0.761128	0.261976	2.90533	0.00366862	0.0438838
ENSMUSG00000021221	70127	Dpf3	354.029	0.441639	0.152014	-2.90525	0.00366955	0.0438838
ENSMUSG00000029622	11867	Arpc1b	1106.59	-0.402878	0.138781	2.90296	0.00369648	0.0441051
ENSMUSG00000005973	19672	Rcn1	1374.74	-0.403132	0.138854	2.90327	0.00369283	0.0441051
ENSMUSG00000068966	241311	Zbtb34	272.51	0.552171	0.190315	-2.90135	0.00371557	0.0442993
ENSMUSG00000031273	94216	Col4a6	1132.61	-0.351192	0.121082	2.90043	0.00372647	0.0443955
ENSMUSG00000024248	20463	Cox7a2l	2163.56	-0.347151	0.119704	2.90008	0.00373072	0.0444125
ENSMUSG00000004698	100861990	Hdac9	38.0285	0.752905	0.259764	-2.89842	0.00375047	0.0445804
ENSMUSG00000050860	237928	Phospho1	184.632	0.518427	0.17889	-2.89803	0.0037552	0.0446025
ENSMUSG00000079419	73656	Ms4a6c	210	-0.593388	0.204789	2.89756	0.0037608	0.0446178
ENSMUSG00000013584	19378	Aldh1a2	547.133	-0.456801	0.157688	2.89687	0.00376904	0.0446228
ENSMUSG00000067455	69386	Hist1h4j	494.952	-0.490098	0.169206	2.89646	0.00377394	0.0446228
ENSMUSG00000064288	69386	Hist1h4k	494.952	-0.490098	0.169206	2.89646	0.00377394	0.0446228
ENSMUSG00000069306	69386	Hist1h4m	494.952	-0.490098	0.169206	2.89646	0.00377394	0.0446228
ENSMUSG00000069305	69386	Hist1h4n	494.952	-0.490098	0.169206	2.89646	0.00377394	0.0446228
ENSMUSG00000060639	69386	Hist1h4i	494.952	-0.490098	0.169206	2.89646	0.00377394	0.0446228
ENSMUSG00000068851	69386	Hist4h4	494.952	-0.490098	0.169206	2.89646	0.00377394	0.0446228
ENSMUSG00000050675	14723	Gp1ba	62.4218	0.643378	0.222111	-2.89666	0.00377163	0.0446228
ENSMUSG00000091405	69386	Hist2h4	494.952	-0.490098	0.169206	2.89646	0.00377394	0.0446228
ENSMUSG00000060981	69386	Hist1h4h	494.952	-0.490098	0.169206	2.89646	0.00377394	0.0446228
ENSMUSG00000069274	69386	Hist1h4f	494.952	-0.490098	0.169206	2.89646	0.00377394	0.0446228
ENSMUSG00000061482	69386	Hist1h4d	494.952	-0.490098	0.169206	2.89646	0.00377394	0.0446228
ENSMUSG00000060678	69386	Hist1h4c	494.952	-0.490098	0.169206	2.89646	0.00377394	0.0446228
ENSMUSG00000069266	69386	Hist1h4b	494.952	-0.490098	0.169206	2.89646	0.00377394	0.0446228
ENSMUSG00000060093	69386	Hist1h4a	494.952	-0.490098	0.169206	2.89646	0.00377394	0.0446228
ENSMUSG00000025175	63828	Fn3k	334.069	0.435833	0.150566	-2.89464	0.00379595	0.0447484
ENSMUSG00000025935	72265	Tram1	2768.24	-0.456258	0.157612	2.89481	0.00379384	0.0447484
ENSMUSG00000024338	16913	Psmb8	325.326	0.4865	0.168047	-2.89503	0.00379124	0.0447484
ENSMUSG00000001870	268977	Ltbp1	3912.98	-0.371821	0.128482	2.89396	0.00380423	0.0448123
ENSMUSG00000026466	208263	Tor1aip1	2427.51	0.489278	0.169164	-2.89234	0.00382389	0.0450102
ENSMUSG00000038872	11906	Zfhx3	723.783	0.459004	0.158747	-2.89142	0.0038351	0.0451084
ENSMUSG00000049791	14366	Fzd4	1625	-0.451358	0.156138	2.89076	0.00384308	0.0451123
ENSMUSG00000015966	50905	Il17rb	44.9343	0.736798	0.254879	-2.89078	0.00384287	0.0451123
ENSMUSG00000044600	66818	9130011J15Rik	1943.67	-0.344808	0.11941	2.8876	0.00388191	0.0454887
ENSMUSG00000025172	56642	Ankrd2	12.058	-0.804582	0.278811	2.88576	0.0039047	0.0456444
ENSMUSG00000022364	210544	Wdr67	188.953	0.534875	0.185339	-2.88593	0.00390255	0.0456444
ENSMUSG00000049411	338363	6030446N20Rik	148.929	0.600342	0.208065	-2.88536	0.00390972	0.0456444
ENSMUSG00000055200	170742	Sertad3	117.051	-0.5368	0.186015	2.88579	0.00390434	0.0456444
ENSMUSG00000050222	239114	Il17d	81.0501	-0.588335	0.203888	2.88558	0.00390693	0.0456444
ENSMUSG00000009291	108705	Pttg1ip	3533.74	-0.367492	0.127395	2.88467	0.00391824	0.0456918
ENSMUSG00000032679	12509	Cd59a	1198.59	-0.415683	0.144106	2.88456	0.00391959	0.0456918
ENSMUSG00000070424	11875	Art5	515.602	0.608328	0.210921	-2.88416	0.00392464	0.0457166
ENSMUSG00000002227	17454	Mov10	172.743	0.590765	0.205135	-2.87989	0.0039782	0.0463063
ENSMUSG00000013275	98396	Slc41a1	2873.18	0.343685	0.119381	-2.87889	0.00399079	0.0464184
ENSMUSG00000028433	68926	Ubap2	1187.92	0.441065	0.153277	-2.87757	0.00400747	0.0465779
ENSMUSG00000036860	67212	Mrpl55	497.879	-0.427772	0.148717	2.87641	0.00402226	0.0466489
ENSMUSG00000050954	67911	Zfp169	201.299	0.50733	0.176364	-2.87661	0.00401971	0.0466489
ENSMUSG00000022040	13850	Ephx2	4724.23	-0.351886	0.122402	2.87483	0.00404239	0.0468453
ENSMUSG00000026727	20163	Rsu1	799.337	-0.371296	0.129272	2.8722	0.00407623	0.0471331
ENSMUSG00000021055	13983	Esr2	23.2045	0.808633	0.281807	-2.86946	0.00411175	0.047474
ENSMUSG00000031994	30806	Adamts8	2597.33	-0.787889	0.274624	2.86897	0.00411811	0.0475125
ENSMUSG00000055799	21415	Tcf7l1	139.542	0.619508	0.216044	-2.86752	0.00413707	0.0476962
ENSMUSG00000047604	212398	Frat2	83.9204	-0.637264	0.222338	2.86619	0.00415446	0.0478265
ENSMUSG00000004044	19285	Ptrf	8096.56	-0.359411	0.125387	2.8664	0.00415164	0.0478265
ENSMUSG00000029672	27999	Fam3c	730.733	-0.374961	0.130875	2.86504	0.00416956	0.0479653
ENSMUSG00000071064	622675	Zfp827	724.139	0.423474	0.147821	-2.86478	0.00417294	0.0479689
ENSMUSG00000031059	104130	Ndufb11	2557.6	-0.325279	0.113639	2.8624	0.00420441	0.0482248
ENSMUSG00000040865	227195	Ino80d	1948.68	0.375481	0.131174	-2.86247	0.00420347	0.0482248
ENSMUSG00000024511	80718	Rab27b	128.409	-0.603044	0.21067	2.8625	0.00420312	0.0482248
ENSMUSG00000061322	68922	Dnaic1	51.6222	-0.647885	0.226406	2.86161	0.00421501	0.048309
ENSMUSG00000042210	68644	Abhd14a	281.677	-0.433266	0.15143	2.86116	0.00422097	0.048309
ENSMUSG00000021972	219150	Hmbox1	537.754	0.375305	0.131163	-2.86137	0.00421813	0.048309
ENSMUSG00000005442	71722	Cic	1416.93	0.551524	0.19297	-2.85808	0.00426213	0.0487092
ENSMUSG00000021313	20191	Ryr2	169424	0.382886	0.134029	-2.85674	0.0042802	0.0488315
ENSMUSG00000056493	17425	Foxk1	1076.18	0.553002	0.193588	-2.85659	0.00428216	0.0488315
ENSMUSG00000060063	11690	Alox5ap	85.6377	-0.584103	0.204465	2.85673	0.00428028	0.0488315
ENSMUSG00000046743	329628	Fat4	1315.71	0.446746	0.156406	-2.85632	0.00428577	0.0488372
ENSMUSG00000031021	56786	Tmem9b	856.079	-0.385787	0.13512	2.85515	0.00430166	0.0489828
ENSMUSG00000060212	270109	Pcnxl2	84.6716	0.607773	0.212937	-2.85424	0.00431401	0.0490878
ENSMUSG00000026836	11477	Acvr1	824.255	0.360524	0.126352	-2.85334	0.00432622	0.0491214
ENSMUSG00000009281	71660	Rarres2	1912.01	-0.536811	0.188106	2.85378	0.00432028	0.0491214
ENSMUSG00000034430	80292	Zxdc	684.495	0.440685	0.154502	-2.85229	0.00434049	0.0492221
ENSMUSG00000020641	58185	Rsad2	169.452	-0.621124	0.217769	2.85222	0.00434147	0.0492221
ENSMUSG00000068744	56742	Psrc1	14.8222	0.797315	0.279611	-2.85151	0.00435116	0.0492609
ENSMUSG00000033644	57746	Piwil2	32.963	0.714449	0.250778	-2.84893	0.0043867	0.0496275
ENSMUSG00000027956	70652	Tmem144	1194.25	-0.467596	0.164237	2.84707	0.00441232	0.0497486
ENSMUSG00000032942	22229	Ucp3	327.776	-0.733649	0.25766	2.84735	0.00440847	0.0497486
ENSMUSG00000019822	20598	Smpd2	576.034	-0.388924	0.136603	2.84711	0.00441176	0.0497486
ENSMUSG00000059119	17955	Nap1l4	4192.74	-0.30774	0.108093	2.84701	0.00441323	0.0497486
ENSMUSG00000016128	243362	Stard13	2347.44	-0.342747	0.120434	2.84592	0.00442827	0.0498823
ENSMUSG00000029638	170772	Glcci1	371.49	0.490355	0.172355	-2.84503	0.00444069	0.0499506
ENSMUSG00000022961	20658	Son	11422.1	0.296053	0.104059	-2.84504	0.00444053	0.0499506
ENSMUSG00000014504	66384	Srp19	423.857	-0.449438	0.158019	2.8442	0.00445229	0.0500452
ENSMUSG00000038151	12142	Prdm1	39.225	0.771505	0.271347	-2.84324	0.0044657	0.0501243
ENSMUSG00000006527	54650	Sfmbt1	625.068	0.397291	0.139721	-2.84345	0.00446278	0.0501243
ENSMUSG00000025782	209361	Taf3	345.334	0.47846	0.168418	-2.84091	0.00449855	0.0504392
ENSMUSG00000024782	56248	Ak3	3353.53	-0.348242	0.122586	2.84079	0.00450017	0.0504392
ENSMUSG00000063428	70503	Ddo	1528.54	-0.384979	0.13554	2.84033	0.00450663	0.0504756
ENSMUSG00000031673	12552	Cdh11	1580.34	-0.448321	0.157881	2.83962	0.00451676	0.050553
ENSMUSG00000084786	66177	Ubl5	1138.02	-0.331927	0.116962	2.83791	0.00454099	0.050788
ENSMUSG00000067194	66235	Eif1ax	1079.54	-0.398812	0.140587	2.83677	0.00455723	0.0509334
ENSMUSG00000028989	654812	Angptl7	150.766	-0.661563	0.233277	2.83596	0.00456884	0.0510269
ENSMUSG00000078157	216622	4931440F15Rik	13.1707	0.79596	0.280707	-2.83555	0.00457465	0.0510279
ENSMUSG00000041779	170829	Tram2	140.337	0.520138	0.183438	-2.8355	0.00457543	0.0510279
ENSMUSG00000021917	69019	Spcs1	969.509	-0.359882	0.126966	2.83448	0.00459004	0.0511546
ENSMUSG00000072704	381820	2700089E24Rik	4080.87	-0.395771	0.139658	2.83386	0.00459899	0.0512139
ENSMUSG00000042700	217692	Sipa1l1	822.152	0.370257	0.130664	-2.83366	0.00460188	0.0512139
ENSMUSG00000042042	78752	Csgalnact2	1360.06	-0.38406	0.135632	2.83163	0.00463108	0.0513669
ENSMUSG00000020899	237823	Pfas	732.053	0.389057	0.137391	-2.83175	0.00462945	0.0513669
ENSMUSG00000035357	55983	Pdzrn3	3899.11	-0.52408	0.185026	2.83247	0.00461894	0.0513669
ENSMUSG00000029027	13368	Dffb	111.21	0.5477	0.193426	-2.83157	0.00463198	0.0513669
ENSMUSG00000010051	15586	Hyal1	282.9	-0.472032	0.166752	2.83074	0.00464407	0.0514285
ENSMUSG00000039759	69876	Thap3	196.833	0.468249	0.165451	-2.83014	0.00465274	0.0514881
ENSMUSG00000025968	227197	Ndufs1	15447.8	-0.351775	0.124334	2.82927	0.00466542	0.0515558
ENSMUSG00000028757	13200	Ddost	2289.58	-0.316347	0.111833	2.82875	0.00467306	0.051604
ENSMUSG00000073676	15528	Hspe1	610.998	-0.448233	0.158482	2.82828	0.00467985	0.0516064
ENSMUSG00000021760	69590	Gpx8	765.521	-0.492572	0.174214	2.82739	0.00469285	0.0517135
ENSMUSG00000048070	193003	Pirt	498.558	0.494571	0.174945	-2.82701	0.00469852	0.0517397
ENSMUSG00000059588	54598	Calcrl	1895.19	-0.519784	0.183907	2.82634	0.00470838	0.051812
ENSMUSG00000071714	12984	Csf2rb2	58.6477	0.782099	0.276751	-2.826	0.00471332	0.05183
ENSMUSG00000079588	381339	Tmem182	2909.27	-0.303866	0.107547	2.82544	0.00472164	0.0518852
ENSMUSG00000029166	100732	Mapre3	497.976	0.522507	0.184947	-2.82517	0.00472549	0.0518867
ENSMUSG00000052997	50995	Uba2	1382.32	-0.334725	0.118487	2.82498	0.00472838	0.0518867
ENSMUSG00000024038	78330	Ndufv3	5046.24	-0.325171	0.115131	2.82437	0.00473738	0.0519492
ENSMUSG00000066191	75691	Anks6	144.87	0.49476	0.175293	-2.82247	0.00476552	0.0522213
ENSMUSG00000036067	227659	Slc2a6	45.3272	0.661314	0.23434	-2.82203	0.00477214	0.0522575
ENSMUSG00000026603	226830	Smyd2	193.233	-0.505092	0.179092	2.82029	0.00479799	0.0525039
ENSMUSG00000041617	72315	Ccdc74a	20.0365	0.778499	0.276124	-2.81938	0.00481169	0.0525806
ENSMUSG00000028613	16975	Lrp8	387.427	-0.489868	0.17382	2.81825	0.00482862	0.0527026
ENSMUSG00000029484	11745	Anxa3	1066.57	-0.598184	0.212259	2.81819	0.00482956	0.0527026
ENSMUSG00000030148	26888	Clec4a2	41.5926	-0.754376	0.267739	2.81758	0.00483878	0.0527431
ENSMUSG00000028909	19273	Ptpru	581.804	0.619013	0.219708	-2.81743	0.00484097	0.0527431
ENSMUSG00000025583	74370	Rptor	1446.48	0.361994	0.128501	-2.81705	0.0048467	0.0527431
ENSMUSG00000004032	14866	Gstm5	1270.09	-0.354975	0.126056	2.816	0.00486254	0.0528657
ENSMUSG00000001891	216558	Ugp2	5776.78	-0.427928	0.151971	2.81586	0.0048647	0.0528657
ENSMUSG00000026094	98267	Stk17b	499.392	-0.44739	0.158979	2.81416	0.00489055	0.0530367
ENSMUSG00000062762	13663	Ei24	1593.22	-0.384153	0.136575	2.81276	0.00491185	0.0532309
ENSMUSG00000000142	12006	Axin2	345.987	0.534856	0.190202	-2.81205	0.00492276	0.0533123
ENSMUSG00000026941	381352	Mamdc4	178.322	0.544017	0.193477	-2.81179	0.00492666	0.0533179
ENSMUSG00000045822	67538	Zswim3	83.4102	0.589325	0.209636	-2.81118	0.00493595	0.0533449
ENSMUSG00000038742	70726	Angptl6	61.7589	0.651651	0.231967	-2.80924	0.00496583	0.0535206
ENSMUSG00000031596	11988	Slc7a2	458.891	0.507266	0.180712	-2.80705	0.00499977	0.0538126
ENSMUSG00000030224	20901	Strap	2453.47	-0.324821	0.115734	2.80663	0.0050063	0.0538459
ENSMUSG00000054874	104401	Pcnxl3	1069.23	0.487838	0.173853	-2.80603	0.00501559	0.053909
ENSMUSG00000033777	279572	Tlr13	151.427	-0.531698	0.189561	2.80488	0.0050335	0.0540157
ENSMUSG00000026228	15559	Htr2b	64.1054	0.630076	0.224639	-2.80484	0.00503418	0.0540157
ENSMUSG00000025786	69035	Zdhhc3	1100.72	-0.312767	0.111514	2.80473	0.00503583	0.0540157
ENSMUSG00000025525	68117	Apool	769.811	-0.458635	0.163598	2.80343	0.00505623	0.0541606
ENSMUSG00000053580	77097	Tanc2	1121.79	0.381213	0.136047	-2.80206	0.00507772	0.0543538
ENSMUSG00000022752	28185	Tomm70a	2639.13	-0.332691	0.118744	2.80175	0.00508263	0.0543692
ENSMUSG00000039781	12009	Azi1	243.767	0.549208	0.196109	-2.80053	0.00510193	0.0545386
ENSMUSG00000048217	217214	Nags	16.2364	0.780063	0.278593	-2.80001	0.00511005	0.0545883
ENSMUSG00000024807	74126	Syvn1	495.229	0.540223	0.192953	-2.79976	0.00511399	0.0545932
ENSMUSG00000006740	16573	Kif5b	7735.52	-0.331938	0.11862	2.79834	0.00513659	0.0547973
ENSMUSG00000024793	85030	Tnfrsf25	68.5842	0.669337	0.239309	-2.79696	0.00515858	0.0549945
ENSMUSG00000021779	21834	Thrb	1032.07	0.413329	0.147805	-2.79645	0.00516671	0.0550438
ENSMUSG00000030731	20981	Syt3	72.0171	0.57347	0.205188	-2.79485	0.00519235	0.0551301
ENSMUSG00000070369	381924	Itgad	44.7645	0.687626	0.245989	-2.79535	0.00518432	0.0551301
ENSMUSG00000026837	12831	Col5a1	3705.94	-0.556782	0.199201	2.79507	0.00518884	0.0551301
ENSMUSG00000048911	51902	Rnf24	242.16	0.438904	0.157034	-2.79496	0.00519057	0.0551301
ENSMUSG00000032611	112418	1700102P08Rik	12.2677	0.785209	0.281095	-2.79339	0.00521585	0.0553423
ENSMUSG00000036452	71302	Arhgap26	3202.39	0.338609	0.121278	-2.79201	0.00523811	0.0555409
ENSMUSG00000027284	68968	Cdan1	741.291	0.414268	0.148409	-2.7914	0.00524798	0.0556081
ENSMUSG00000006276	13859	Eps15l1	1367.46	0.314737	0.112786	-2.79058	0.00526143	0.055713
ENSMUSG00000006932	12387	Ctnnb1	14158.1	-0.302745	0.108513	2.78995	0.0052716	0.0557831
ENSMUSG00000063919	68955	Srrm4	97.9495	0.629241	0.225578	-2.78947	0.00527951	0.0557917
ENSMUSG00000006736	67125	Tspan31	1211.53	-0.333343	0.1195	2.78947	0.00527944	0.0557917
ENSMUSG00000020022	66414	Ndufa12	253.45	-0.42622	0.152823	2.78898	0.00528735	0.055837
ENSMUSG00000031609	60406	Sap30	208.561	-0.45426	0.162931	2.78806	0.00530252	0.0559596
ENSMUSG00000047749	209032	Zc3hav1l	212.864	0.596756	0.214095	-2.78734	0.00531424	0.0560456
ENSMUSG00000024969	13728	Mark2	1073.96	0.470333	0.168764	-2.78693	0.00532095	0.0560647
ENSMUSG00000001419	17261	Mef2d	1392.59	0.518921	0.186207	-2.7868	0.00532319	0.0560647
ENSMUSG00000038020	268480	Rapgefl1	76.0505	0.566632	0.203409	-2.78567	0.00534165	0.0561979
ENSMUSG00000057836	22445	Xlr3a	8.08087	-0.768058	0.275747	2.78538	0.00534656	0.0561979
ENSMUSG00000021495	212483	Fam193b	724.546	0.463603	0.166484	-2.78467	0.0053583	0.0562028
ENSMUSG00000048521	80901	Cxcr6	81.9547	0.674049	0.242095	-2.78424	0.0053654	0.0562028
ENSMUSG00000043467	240869	Zbtb37	504.955	0.398975	0.143306	-2.78408	0.00536806	0.0562028
ENSMUSG00000057093	112415	C030039L03Rik	44.9072	0.714335	0.256588	-2.78398	0.00536968	0.0562028
ENSMUSG00000051431	84111	Gpr87	11.3764	0.766751	0.275342	-2.78472	0.00535745	0.0562028
ENSMUSG00000022946	70028	Dopey2	1078.09	0.391652	0.140796	-2.7817	0.00540758	0.0564991
ENSMUSG00000004508	14389	Gab2	1787.6	-0.351949	0.126583	2.78037	0.00542968	0.0566857
ENSMUSG00000050350	110168	Gpr18	34.6587	0.725267	0.260869	-2.78019	0.00543265	0.0566857
ENSMUSG00000030428	57776	Ttyh1	75.2758	-0.642975	0.231376	2.77892	0.00545396	0.0568326
ENSMUSG00000024981	433256	Acsl5	964.122	-0.353868	0.127417	2.77725	0.00548208	0.0569745
ENSMUSG00000055670	195018	Zzef1	3051.99	0.288793	0.103966	-2.77777	0.00547331	0.0569745
ENSMUSG00000004151	14009	Etv1	500.662	0.469191	0.168927	-2.77749	0.00547811	0.0569745
ENSMUSG00000045725	78004	Prr15	150.146	-0.57337	0.20644	2.77742	0.00547928	0.0569745
ENSMUSG00000072662	545893	Gm5887	23.7301	0.777528	0.279987	-2.77701	0.00548613	0.0569789
ENSMUSG00000035632	232791	Cnot3	289.555	0.475986	0.171429	-2.77658	0.00549341	0.0569791
ENSMUSG00000025871	97820	4833439L19Rik	2020.85	-0.29775	0.107233	2.77667	0.00549184	0.0569791
ENSMUSG00000057738	20740	Spna2	20036.4	-0.375049	0.135101	2.77606	0.00550227	0.0569959
ENSMUSG00000027864	19221	Ptgfrn	5366.11	-0.30583	0.11016	2.77624	0.00549923	0.0569959
ENSMUSG00000003119	69131	Cdk12	1618.67	0.350011	0.126118	-2.77526	0.00551583	0.0570611
ENSMUSG00000091297	667063	Gm8439	13.1408	0.781081	0.281444	-2.77526	0.00551569	0.0570611
ENSMUSG00000032324	56434	Tspan3	2689.65	-0.373948	0.134771	2.7747	0.00552534	0.0570932
ENSMUSG00000031393	17257	Mecp2	2498	0.418678	0.150894	-2.77465	0.0055262	0.0570932
ENSMUSG00000022973	104015	Synj1	1099.51	0.336678	0.121364	-2.77411	0.00553525	0.0571491
ENSMUSG00000024906	71711	Mus81	471.124	0.444184	0.160136	-2.77379	0.00554068	0.0571676
ENSMUSG00000032050	19684	Rdx	6391.12	-0.38689	0.139554	2.77234	0.00556554	0.0572374
ENSMUSG00000020664	13382	Dld	7365.75	-0.40646	0.146611	2.77237	0.00556503	0.0572374
ENSMUSG00000057604	30937	Lmcd1	554.604	-0.663405	0.239289	2.77241	0.00556435	0.0572374
ENSMUSG00000026181	68606	Ppm1f	1772.77	-0.411554	0.148419	2.77292	0.00555553	0.0572374
ENSMUSG00000029009	17769	Mthfr	804.522	0.403269	0.145478	-2.77203	0.00557084	0.0572532
ENSMUSG00000002910	70807	Arrdc2	429.636	-0.771499	0.278392	2.77127	0.00558376	0.0572865
ENSMUSG00000044072	237711	Eml6	550.828	0.340265	0.122775	-2.77144	0.00558085	0.0572865
ENSMUSG00000006423	77644	C330007P06Rik	373.424	-0.436565	0.157536	2.7712	0.00558501	0.0572865
ENSMUSG00000020709	216991	Adap2	374.572	-0.468183	0.168991	2.77046	0.0055978	0.0573802
ENSMUSG00000000275	217069	Trim25	870.662	0.396563	0.143207	-2.76917	0.00561996	0.0575698
ENSMUSG00000039239	21808	Tgfb2	594.597	-0.424978	0.153511	2.7684	0.00563331	0.0576689
ENSMUSG00000027774	28030	Gfm1	4117.97	-0.329548	0.119053	2.76808	0.00563884	0.0576758
ENSMUSG00000015536	17434	Mocs2	780.849	-0.366727	0.132491	2.76793	0.00564132	0.0576758
ENSMUSG00000055480	238690	Zfp458	126.753	0.600063	0.217138	-2.76351	0.00571842	0.0583789
ENSMUSG00000036880	52538	Acaa2	14352.5	-0.374665	0.135584	2.76334	0.00572124	0.0583789
ENSMUSG00000010205	71766	Raver1	818.986	0.439358	0.159007	-2.76313	0.005725	0.0583794
ENSMUSG00000042320	73422	Prox2	57.0728	0.699397	0.253176	-2.76249	0.00573623	0.058456
ENSMUSG00000028675	52830	Pnrc2	1341.96	-0.444872	0.161055	2.76224	0.00574062	0.0584628
ENSMUSG00000027293	98878	Ehd4	34194.3	-0.30309	0.109739	2.76191	0.00574635	0.0584832
ENSMUSG00000023079	57080	Gtf2ird1	422.619	0.41853	0.151639	-2.76005	0.00577933	0.0587808
ENSMUSG00000051910	20679	Sox6	1178.15	0.390283	0.141457	-2.75903	0.00579737	0.058888
ENSMUSG00000042788	329831	Fam166b	22.4659	0.77616	0.281426	-2.75795	0.00581645	0.0590438
ENSMUSG00000045576	229681	St7l	772.558	0.391156	0.141878	-2.75699	0.00583363	0.0591417
ENSMUSG00000022186	67041	Oxct1	12312.4	-0.4413	0.160118	2.7561	0.00584955	0.0592649
ENSMUSG00000044006	68709	Cilp2	3421.28	-0.467353	0.169587	2.75583	0.00585438	0.0592756
ENSMUSG00000031910	15118	Has3	224.055	0.567828	0.206136	-2.75462	0.00587601	0.0594262
ENSMUSG00000021076	56444	Actr10	1361.58	-0.322346	0.117022	2.75458	0.00587682	0.0594262
ENSMUSG00000043411	170707	Usp48	1677.13	0.336481	0.122183	-2.7539	0.00588896	0.0595107
ENSMUSG00000037646	666173	Vps13b	2931.12	0.375797	0.136497	-2.75316	0.00590233	0.0596075
ENSMUSG00000026077	18143	Npas2	74.9073	0.596821	0.216829	-2.7525	0.00591424	0.0596511
ENSMUSG00000049871	268857	Nlrc3	40.164	0.681153	0.247461	-2.75257	0.00591304	0.0596511
ENSMUSG00000023977	224826	Ubr2	4719.14	0.46435	0.168715	-2.75228	0.00591821	0.0596529
ENSMUSG00000011263	74463	Exoc3l2	94.7235	-0.663023	0.240939	2.75183	0.00592637	0.0596968
ENSMUSG00000040747	12508	Cd53	181.117	-0.540504	0.196454	2.7513	0.00593599	0.0597171
ENSMUSG00000039238	319530	Zfp750	23.5481	0.774315	0.281434	-2.75132	0.00593564	0.0597171
ENSMUSG00000020220	230895	Vps13d	9141.61	0.299151	0.108791	-2.74979	0.00596339	0.0599161
ENSMUSG00000076433	58251	BC100451	95.7713	0.573373	0.208508	-2.74988	0.00596168	0.0599161
ENSMUSG00000006205	56213	Htra1	3419.51	-0.320285	0.116531	2.7485	0.0059868	0.0600745
ENSMUSG00000030278	14311	Cidec	96.6012	-0.699854	0.254652	2.74827	0.00599105	0.0600787
ENSMUSG00000091530	621628	Cldn20	12.3922	0.773016	0.281329	-2.74773	0.00600097	0.0601399
ENSMUSG00000030282	12764	Cmas	868.224	-0.383274	0.139521	2.74707	0.00601299	0.0601453
ENSMUSG00000026895	68375	Ndufa8	231.526	-0.434671	0.158221	2.74725	0.00600979	0.0601453
ENSMUSG00000014551	64658	Mrps25	1147.96	-0.370278	0.13477	2.74748	0.00600558	0.0601453
ENSMUSG00000029097	78890	2310079F23Rik	155.641	0.513276	0.186887	-2.74645	0.00602447	0.0601834
ENSMUSG00000030884	67003	Uqcrc2	16945.1	-0.340521	0.123981	2.74657	0.00602229	0.0601834
ENSMUSG00000023153	69671	Tmem52	65.1985	-0.754733	0.274834	2.74614	0.00603005	0.0602009
ENSMUSG00000013236	19280	Ptprs	4055.52	0.372914	0.135808	-2.74589	0.00603475	0.0602095
ENSMUSG00000025647	66940	Shisa5	1434.73	-0.413726	0.150698	2.74539	0.00604391	0.0602245
ENSMUSG00000028690	67096	Mmachc	850.906	-0.479943	0.174869	2.74459	0.0060587	0.0603336
ENSMUSG00000030795	233908	Fus	369.736	0.528842	0.192715	-2.74416	0.00606655	0.0603548
ENSMUSG00000028307	230163	Aldob	63.5904	0.706718	0.257599	-2.74349	0.00607905	0.0603548
ENSMUSG00000047554	233724	Tmem41b	335.694	-0.417872	0.152323	2.74333	0.00608193	0.0603548
ENSMUSG00000002608	52132	Ccdc97	724.683	0.504217	0.183818	-2.74302	0.00608772	0.0603548
ENSMUSG00000033585	17984	Ndn	430.821	-0.469493	0.171106	2.74388	0.0060718	0.0603548
ENSMUSG00000079177	74855	4930417G10Rik	23.3762	0.769796	0.280561	-2.74378	0.00607367	0.0603548
ENSMUSG00000024769	240505	Cdc42bpg	700.393	0.504649	0.183966	-2.74317	0.0060849	0.0603548
ENSMUSG00000040570	242819	Rundc3b	42.3528	-0.715263	0.260782	2.74277	0.00609242	0.0603634
ENSMUSG00000009614	192166	Sardh	301.799	-0.528946	0.192889	2.74223	0.00610232	0.0604233
ENSMUSG00000040537	11496	Adam22	705.603	0.485565	0.177118	-2.74148	0.00611624	0.06048
ENSMUSG00000030088	107747	Aldh1l1	270.427	0.497993	0.181663	-2.7413	0.00611958	0.06048
ENSMUSG00000048814	381338	Lonrf2	207.33	0.588887	0.214854	-2.74088	0.00612756	0.0605207
ENSMUSG00000014039	114604	Prdm15	325.626	0.443404	0.161901	-2.73873	0.00616769	0.0608666
ENSMUSG00000027246	269344	Ell3	8.18292	0.755777	0.275973	-2.73859	0.00617033	0.0608666
ENSMUSG00000030218	17313	Mgp	15838	-0.529932	0.193537	2.73815	0.00617868	0.0609108
ENSMUSG00000041180	226098	Hectd2	220.381	-0.445402	0.162711	2.73739	0.00619292	0.0610051
ENSMUSG00000027173	211896	Depdc7	29.5475	-0.70901	0.259025	2.73722	0.00619602	0.0610051
ENSMUSG00000042770	15199	Hebp1	339.717	-0.394188	0.144039	2.73668	0.00620634	0.0610685
ENSMUSG00000058886	54006	Deaf1	217.571	0.518472	0.189478	-2.73633	0.00621294	0.0610952
ENSMUSG00000019539	52377	Rcn3	1090.98	-0.434756	0.158933	2.73547	0.00622914	0.061178
ENSMUSG00000031805	16453	Jak3	359.121	0.519819	0.190105	-2.73438	0.00624983	0.0613428
ENSMUSG00000085795	353310	Zfp703	465.143	0.765285	0.279898	-2.73416	0.00625393	0.0613448
ENSMUSG00000038773	277250	Kdm3b	2067.42	0.349698	0.127921	-2.7337	0.00626273	0.0613927
ENSMUSG00000022257	114128	Laptm4b	1860.07	-0.379001	0.138666	2.7332	0.00627215	0.0614468
ENSMUSG00000018537	22658	Pcgf2	117.657	0.608709	0.222747	-2.73274	0.00628106	0.0614957
ENSMUSG00000034040	212996	Wbscr17	91.9357	0.577815	0.21149	-2.73212	0.00629288	0.0615731
ENSMUSG00000027999	66350	Pla2g12a	588.919	-0.389325	0.142547	2.73121	0.00631015	0.0616269
ENSMUSG00000037331	73158	Larp1	2620.47	0.401881	0.147143	-2.73123	0.00630989	0.0616269
ENSMUSG00000057614	14677	Gnai1	300.26	-0.425405	0.155757	2.73122	0.00631011	0.0616269
ENSMUSG00000040146	71746	Rgl3	169.873	0.54402	0.199327	-2.72928	0.00634722	0.0619505
ENSMUSG00000034205	94352	Loxl2	273.642	-0.545102	0.199789	2.72839	0.00636438	0.0620794
ENSMUSG00000036246	78816	Gmip	178.52	0.539659	0.197902	-2.7269	0.00639317	0.062148
ENSMUSG00000053199	244867	Arhgap20	1153.4	0.403214	0.147889	-2.72645	0.00640188	0.062148
ENSMUSG00000062981	67270	Mrpl42	2222.9	-0.465486	0.170719	2.72663	0.00639849	0.062148
ENSMUSG00000032870	69780	Smap2	882.088	0.34356	0.126027	-2.72608	0.0064091	0.062148
ENSMUSG00000023044	246277	Csad	334.002	0.415983	0.152595	-2.72606	0.00640958	0.062148
ENSMUSG00000019899	16773	Lama2	15236.3	-0.330909	0.121391	2.72599	0.00641096	0.062148
ENSMUSG00000066568	67070	Lsm14a	1464.86	0.318636	0.116857	-2.72671	0.00639692	0.062148
ENSMUSG00000015134	56847	Aldh1a3	59.1635	0.715268	0.262372	-2.72616	0.00640762	0.062148
ENSMUSG00000041775	69546	Mapk1ip1	368.472	0.48146	0.176523	-2.72747	0.00638224	0.062148
ENSMUSG00000025784	21922	Clec3b	722.585	0.414587	0.15212	-2.72539	0.00642257	0.0622
ENSMUSG00000031906	58994	Smpd3	691.962	-0.505761	0.1856	2.72501	0.00643	0.0622
ENSMUSG00000048899	194237	Rimkla	62.4942	0.729641	0.267768	-2.7249	0.00643216	0.0622
ENSMUSG00000020668	16570	Kif3c	348.074	0.397763	0.145965	-2.72506	0.0064289	0.0622
ENSMUSG00000023800	24001	Tiam2	374.016	-0.409703	0.150367	2.72468	0.00643644	0.0622031
ENSMUSG00000032558	74025	Nphp3	757.334	0.33096	0.121519	-2.72351	0.00645914	0.0623841
ENSMUSG00000050014	328561	Apol10b	25.1555	0.752353	0.276319	-2.72277	0.00647377	0.0624037
ENSMUSG00000031246	56726	Sh3bgrl	1560.99	-0.553658	0.203315	2.72315	0.00646629	0.0624037
ENSMUSG00000013033	330814	Lphn1	1879.94	0.380553	0.139786	-2.72239	0.00648125	0.0624037
ENSMUSG00000022490	58200	Ppp1r1a	180.122	-0.450348	0.165423	2.72241	0.00648084	0.0624037
ENSMUSG00000062410	15494	Hsd3b3	7.65644	0.740002	0.271837	-2.72222	0.00648441	0.0624037
ENSMUSG00000037253	240396	Mex3c	950.317	-0.354434	0.130263	2.72092	0.00651013	0.0626072
ENSMUSG00000073418	12268	C4b	1616.59	0.554814	0.203998	-2.71971	0.006534	0.0626803
ENSMUSG00000018567	56486	Gabarap	743.335	-0.382395	0.140598	2.71978	0.00653248	0.0626803
ENSMUSG00000020993	78232	Trappc6b	596.249	-0.36177	0.133027	2.71952	0.00653767	0.0626803
ENSMUSG00000039661	66959	Dusp26	25.6991	0.760986	0.279768	-2.72006	0.00652696	0.0626803
ENSMUSG00000037513	233033	Samd4b	632.612	0.614254	0.225885	-2.71932	0.00654169	0.0626806
ENSMUSG00000022100	65246	Xpo7	1670.23	0.332246	0.122251	-2.71774	0.00657295	0.0629417
ENSMUSG00000026510	209456	Trp53bp2	906.831	0.334301	0.123031	-2.71722	0.00658338	0.0629648
ENSMUSG00000040472	56187	Rabggta	407.755	0.368892	0.135757	-2.7173	0.00658163	0.0629648
ENSMUSG00000052336	13051	Cx3cr1	79.5425	-0.732343	0.269652	2.71588	0.00660991	0.0630808
ENSMUSG00000029102	54426	Hgfac	22.7673	0.758016	0.279161	-2.71534	0.00662079	0.0630808
ENSMUSG00000029419	381353	Gm996	8.58959	0.758689	0.279359	-2.71582	0.00661117	0.0630808
ENSMUSG00000024302	13527	Dtna	1746.7	-0.387155	0.142588	2.7152	0.00662361	0.0630808
ENSMUSG00000031352	15159	Hccs	1448.59	-0.415436	0.152995	2.71536	0.00662028	0.0630808
ENSMUSG00000029152	68095	Ociad1	4047.1	-0.360005	0.132561	2.71577	0.00661226	0.0630808
ENSMUSG00000052593	11491	Adam17	1471.96	-0.359364	0.132301	2.71626	0.00660238	0.0630808
ENSMUSG00000001827	14275	Folr1	27.3935	-0.722995	0.266314	2.71483	0.00663106	0.0631136
ENSMUSG00000023927	20230	Satb1	614.99	0.4339	0.159848	-2.71445	0.00663858	0.0631469
ENSMUSG00000024393	53761	Prrc2a	4994.62	0.474051	0.174945	-2.70972	0.006734	0.0639771
ENSMUSG00000005732	19385	Ranbp1	440.227	-0.401335	0.148153	2.70892	0.00675025	0.064054
ENSMUSG00000078954	73167	Arhgap8	21.8734	0.723056	0.267058	-2.70749	0.00677945	0.0642148
ENSMUSG00000021451	20354	Sema4d	494.727	0.446145	0.164761	-2.70783	0.00677253	0.0642148
ENSMUSG00000029778	11517	Adcyap1r1	441.208	0.518573	0.191523	-2.70762	0.00677672	0.0642148
ENSMUSG00000021913	239017	Ogdhl	387.085	-0.575257	0.212544	2.70654	0.00679889	0.0643601
ENSMUSG00000026574	56429	Dpt	6817.63	-0.473127	0.174852	2.70587	0.0068126	0.064451
ENSMUSG00000042557	20466	Sin3a	1448.03	0.318667	0.117779	-2.70564	0.0068173	0.0644567
ENSMUSG00000055839	67673	Tceb2	852.099	-0.333746	0.123387	2.70488	0.00683298	0.0644886
ENSMUSG00000044667	229791	D3Bwg0562e	33.9979	-0.723748	0.267567	2.70492	0.00683202	0.0644886
ENSMUSG00000027763	56758	Mbnl1	8580.79	-0.375598	0.138854	2.70499	0.00683068	0.0644886
ENSMUSG00000068115	78177	Ninl	341.858	0.446201	0.165032	-2.70373	0.00685668	0.0646734
ENSMUSG00000033943	29808	Mga	4637.79	0.415119	0.153553	-2.70343	0.00686288	0.0646931
ENSMUSG00000037493	56506	Cib2	105.99	0.576373	0.213264	-2.70263	0.00687935	0.0648094
ENSMUSG00000027309	228602	4930402H24Rik	2644.37	0.298238	0.110404	-2.70135	0.00690595	0.0649432
ENSMUSG00000031467	52123	Agpat5	964.129	-0.429695	0.159111	2.7006	0.00692141	0.0650496
ENSMUSG00000040705	100503495	A930016O22Rik	29.9349	0.757909	0.280758	-2.69951	0.00694415	0.0652244
ENSMUSG00000028266	16911	Lmo4	670.72	-0.387367	0.143534	2.69878	0.00695936	0.0652892
ENSMUSG00000021772	69721	Nkiras1	564.1	-0.370751	0.137407	2.69819	0.00697178	0.0653667
ENSMUSG00000028347	230157	Tmeff1	45.8278	-0.71423	0.264757	2.69768	0.0069824	0.0654272
ENSMUSG00000031353	245688	Rbbp7	2620.93	-0.365518	0.135524	2.69708	0.00699509	0.065507
ENSMUSG00000024241	20662	Sos1	1061.34	0.41394	0.153523	-2.69627	0.00701202	0.0655874
ENSMUSG00000039740	56737	Alg2	298.191	0.430015	0.159523	-2.69563	0.00702551	0.0656355
ENSMUSG00000059734	225887	Ndufs8	3947.88	-0.345848	0.128292	2.69579	0.00702211	0.0656355
ENSMUSG00000021186	23876	Fbln5	1151.89	-0.454068	0.16848	2.69509	0.007037	0.0657038
ENSMUSG00000018595	14657	Glra4	14.4614	0.758362	0.281427	-2.6947	0.00704513	0.0657277
ENSMUSG00000025332	20591	Kdm5c	2777.79	0.447083	0.165993	-2.69339	0.00707287	0.0659212
ENSMUSG00000031660	26992	Brd7	1397.24	-0.308526	0.114578	2.69271	0.0070874	0.0659656
ENSMUSG00000016494	12490	Cd34	6239.04	-0.424569	0.157681	2.69258	0.00709023	0.0659656
ENSMUSG00000002741	56418	Ykt6	1550.2	-0.318994	0.118542	2.69098	0.00712428	0.066204
ENSMUSG00000026630	381319	Batf3	11.2047	0.753542	0.280018	-2.69105	0.00712276	0.066204
ENSMUSG00000000563	11950	Atp5f1	8183.18	-0.327131	0.12159	2.69044	0.00713589	0.0662416
ENSMUSG00000024049	17929	Myom1	42641.7	-0.312379	0.116109	2.69039	0.00713676	0.0662416
ENSMUSG00000018412	76719	1700081L11Rik	1050.22	0.355574	0.132201	-2.68965	0.0071526	0.0663218
ENSMUSG00000040666	50795	Sh3bgr	2730.16	-0.618925	0.230154	2.68918	0.00716282	0.0663659
ENSMUSG00000015850	229595	Adamtsl4	2655.07	0.472311	0.175668	-2.68866	0.00717401	0.0664304
ENSMUSG00000030615	66271	Tmem126a	1193.67	-0.467211	0.17399	2.68527	0.00724721	0.0670292
ENSMUSG00000019734	353499	Tmc4	32.4648	0.695185	0.258931	-2.68482	0.00725679	0.0670389
ENSMUSG00000049265	16527	Kcnk3	6883.61	0.443077	0.165024	-2.68492	0.00725465	0.0670389
ENSMUSG00000031516	22428	Dctn6	1094.95	-0.393256	0.146492	2.68449	0.00726407	0.0670667
ENSMUSG00000072966	245607	Gprasp2	198.917	0.485512	0.180892	-2.68398	0.00727505	0.0670893
ENSMUSG00000049536	237052	Tceal1	218.577	-0.430689	0.160534	2.68286	0.0072996	0.067158
ENSMUSG00000090273	100504446	Prr22	8.92793	0.740446	0.275957	-2.6832	0.00729218	0.067158
ENSMUSG00000026111	67387	Unc50	539.883	-0.334926	0.124834	2.68296	0.00729729	0.067158
ENSMUSG00000026062	226999	Slc9a2	459.413	0.372624	0.13887	-2.68326	0.00729078	0.067158
ENSMUSG00000041343	73845	Ankrd42	45.971	0.641689	0.239286	-2.68168	0.00732532	0.0672765
ENSMUSG00000022519	106393	Srl	44889.2	-0.541667	0.201983	2.68175	0.0073239	0.0672765
ENSMUSG00000030617	75338	Ccdc83	26.4117	-0.746286	0.278347	2.68113	0.00733733	0.0673001
ENSMUSG00000058441	406218	Panx2	215.051	0.582279	0.217189	-2.68098	0.00734074	0.0673001
ENSMUSG00000029144	71752	Gtf3c2	1349.03	0.317174	0.118303	-2.68103	0.00733949	0.0673001
ENSMUSG00000025016	107358	Tm9sf3	5937.02	-0.389219	0.145295	2.67882	0.00738817	0.0676954
ENSMUSG00000051185	67698	Fam174a	686.271	-0.379748	0.141793	2.67819	0.00740214	0.0677839
ENSMUSG00000046364	26451	Rpl27a	383.9	-0.428209	0.159904	2.67792	0.00740817	0.0677997
ENSMUSG00000057036	26451	Gm7536	383.9	-0.428209	0.159904	2.67792	0.00740817	0.0677997
ENSMUSG00000061535	109323	C1qtnf7	584.323	-0.388421	0.14506	2.67765	0.00741402	0.0678137
ENSMUSG00000037822	68552	1110003E01Rik	1993.51	-0.314274	0.117474	2.67527	0.00746697	0.0682583
ENSMUSG00000025510	12476	Cd151	4783.07	-0.301444	0.112698	2.6748	0.00747737	0.0683136
ENSMUSG00000029456	71985	Acad10	170.734	0.486468	0.181886	-2.67457	0.00748248	0.0683205
ENSMUSG00000003154	60611	Foxj2	1153.81	0.428138	0.160094	-2.6743	0.00748858	0.0683366
ENSMUSG00000035049	107094	Rrp12	542.598	-0.520589	0.194872	2.67144	0.00755259	0.0688407
ENSMUSG00000061104	100041953	Gm10094	253.13	-0.427599	0.160107	2.6707	0.00756931	0.0689531
ENSMUSG00000021963	100041953	Sap18	253.13	-0.427599	0.160107	2.6707	0.00756931	0.0689531
ENSMUSG00000008932	242607	Slc1a7	256.159	-0.402653	0.150791	2.67028	0.00757882	0.0689997
ENSMUSG00000029673	319974	Auts2	478.088	0.424203	0.158882	-2.66992	0.00758692	0.0690335
ENSMUSG00000028383	72479	Hsdl2	3487.96	-0.420707	0.157588	2.66966	0.00759283	0.0690473
ENSMUSG00000036885	622434	Arhgef26	503.995	0.398137	0.149167	-2.66908	0.00760604	0.0690875
ENSMUSG00000051695	23983	Pcbp1	944.051	0.52437	0.196456	-2.66914	0.00760452	0.0690875
ENSMUSG00000020747	71947	2310067B10Rik	2867.52	0.360279	0.135003	-2.66869	0.00761487	0.0691278
ENSMUSG00000062190	71835	Lancl2	414.512	-0.435114	0.163085	2.66802	0.00762995	0.0692246
ENSMUSG00000039463	77031	Slc9a8	952.973	0.324648	0.121748	-2.66656	0.0076633	0.069407
ENSMUSG00000001305	67223	Rrp15	183.584	-0.428326	0.160619	2.66672	0.0076596	0.069407
ENSMUSG00000022181	12274	C6	11.6848	0.751202	0.281673	-2.66693	0.00765484	0.069407
ENSMUSG00000032988	57274	Slc16a8	50.5136	0.663073	0.248694	-2.66622	0.007671	0.0694161
ENSMUSG00000019837	67371	Gtf3c6	250.74	-0.433214	0.162492	2.66607	0.00767433	0.0694161
ENSMUSG00000019920	110829	Lims1	4782.45	-0.333676	0.125163	2.66593	0.00767756	0.0694161
ENSMUSG00000071656	68852	Lrrn4cl	219.869	-0.487466	0.182984	2.66398	0.00772225	0.06978
ENSMUSG00000055782	26874	Abcd2	332.926	-0.495382	0.186025	2.66299	0.00774509	0.0698157
ENSMUSG00000032131	192663	Abcg4	37.9287	0.670218	0.251684	-2.66294	0.00774616	0.0698157
ENSMUSG00000030447	20430	Cyfip1	2566.35	-0.363326	0.136443	2.66284	0.00774841	0.0698157
ENSMUSG00000024750	22682	Zfand5	3227.33	-0.364695	0.136926	2.66345	0.00773441	0.0698157
ENSMUSG00000023175	12215	Bsg	12516.9	-0.277385	0.104185	2.66242	0.00775802	0.0698221
ENSMUSG00000027165	68170	B230118H07Rik	1344.32	-0.313906	0.11794	2.66158	0.00777756	0.069958
ENSMUSG00000030276	101100	Ttll3	80.0987	0.582504	0.218941	-2.66055	0.00780137	0.0700919
ENSMUSG00000020838	15567	Slc6a4	161.879	-0.584205	0.219645	2.65976	0.00781957	0.0702153
ENSMUSG00000025892	14802	Gria4	19.0331	-0.735776	0.2767	2.65911	0.0078348	0.0703109
ENSMUSG00000071317	23828	Bves	1492.55	-0.376469	0.141587	2.65892	0.00783917	0.0703109
ENSMUSG00000043885	234967	Slc36a4	284.907	-0.39565	0.148829	2.65842	0.00785082	0.070324
ENSMUSG00000056515	106572	Rab31	803.603	-0.386598	0.14542	2.6585	0.00784892	0.070324
ENSMUSG00000033902	26390	Mapkbp1	896.032	0.366152	0.13774	-2.65828	0.00785405	0.070324
ENSMUSG00000026566	68481	Mpzl1	324.441	0.3822	0.143793	-2.65799	0.00786088	0.070345
ENSMUSG00000053411	52609	Cbx7	661.67	0.50364	0.18951	-2.65759	0.00787019	0.0703482
ENSMUSG00000005705	11604	Agrp	14.5218	0.745638	0.280553	-2.65774	0.00786668	0.0703482
ENSMUSG00000018846	211347	Pank3	1769	-0.37693	0.141858	2.6571	0.00788171	0.0704112
ENSMUSG00000073643	69368	Wdfy1	1211.38	-0.363762	0.136919	2.65677	0.0078893	0.0704389
ENSMUSG00000024134	20472	Six2	8.30453	0.714376	0.26898	-2.65586	0.00791053	0.0705883
ENSMUSG00000020044	21859	Timp3	22584.5	-0.476193	0.179376	2.65471	0.00793756	0.0707492
ENSMUSG00000018820	319740	Zfyve27	783.744	0.353278	0.133072	-2.65478	0.0079359	0.0707492
ENSMUSG00000048677	233979	Tpcn2	178.466	0.484006	0.182494	-2.65218	0.00799743	0.0712424
ENSMUSG00000002266	22776	Zim1	60.0646	0.650987	0.24552	-2.65146	0.00801443	0.0713534
ENSMUSG00000059201	16846	Lep	8.87955	-0.672783	0.253814	2.65069	0.00803272	0.0714758
ENSMUSG00000029192	100855	Tbc1d14	533.126	0.368157	0.138936	-2.64983	0.00805333	0.0716186
ENSMUSG00000027799	26422	Nbea	2797.78	0.347565	0.131178	-2.64956	0.00805965	0.0716343
ENSMUSG00000022240	18163	Ctnnd2	8.99485	0.741546	0.279955	-2.64881	0.00807767	0.0716972
ENSMUSG00000035000	13482	Dpp4	1378.02	-0.512588	0.193528	2.64866	0.0080812	0.0716972
ENSMUSG00000021361	66154	Tmem14c	957.924	-0.359331	0.135685	2.64827	0.0080904	0.0716972
ENSMUSG00000024537	107047	Psmg2	259.58	-0.429681	0.162235	2.64851	0.00808486	0.0716972
ENSMUSG00000027377	228576	Mall	171.486	-0.557057	0.21036	2.64812	0.00809411	0.0716972
ENSMUSG00000026385	13167	Dbi	1658.69	-0.439376	0.165953	2.64759	0.00810675	0.0717687
ENSMUSG00000078164	100043364	Gm4392	462.075	0.545003	0.205902	-2.6469	0.00812337	0.0717966
ENSMUSG00000017817	59091	Jph2	12133.7	-0.45497	0.171889	2.64689	0.00812361	0.0717966
ENSMUSG00000052337	76614	Immt	12045	-0.294438	0.111226	2.64721	0.00811591	0.0717966
ENSMUSG00000031891	15484	Hsd11b2	12.8779	0.745289	0.281703	-2.64566	0.00815325	0.0720181
ENSMUSG00000030683	233878	Sez6l2	32.1916	0.706015	0.266958	-2.64467	0.00817715	0.0721733
ENSMUSG00000025544	68059	Tm9sf2	4716.1	-0.378693	0.143247	2.64364	0.00820188	0.0722851
ENSMUSG00000032475	17973	Nck1	819.923	-0.315493	0.11939	2.64254	0.00822862	0.0724395
ENSMUSG00000034566	71679	Atp5h	4053	-0.334468	0.12659	2.64213	0.00823855	0.0724457
ENSMUSG00000029512	22241	Ulk1	1790.78	0.487305	0.18448	-2.64151	0.0082538	0.0725393
ENSMUSG00000006782	12799	Cnp	447.662	0.362407	0.137221	-2.64104	0.00826522	0.072599
ENSMUSG00000034472	75141	Rasd2	60.7006	0.635713	0.240782	-2.6402	0.00828566	0.0727379
ENSMUSG00000028184	99633	Lphn2	2517.04	0.289075	0.109533	-2.63915	0.00831135	0.0729227
ENSMUSG00000055491	226169	Pprc1	583.339	0.547949	0.207771	-2.63727	0.00835765	0.073288
ENSMUSG00000025140	209027	Pycr1	42.6125	0.6854	0.259954	-2.63662	0.00837357	0.0733134
ENSMUSG00000021918	23955	Nek4	157.775	0.446771	0.169451	-2.63658	0.00837454	0.0733134
ENSMUSG00000020435	74309	Osbp2	1450.22	0.49574	0.188016	-2.63669	0.00837186	0.0733134
ENSMUSG00000021477	13039	Ctsl	6024.01	-0.398286	0.1511	2.6359	0.00839144	0.0733775
ENSMUSG00000000399	66108	Ndufa9	6865.66	-0.288823	0.109591	2.63547	0.00840208	0.0733775
ENSMUSG00000019590	13056	Cyb561	464.62	-0.354165	0.134395	2.63525	0.00840746	0.0733775
ENSMUSG00000051279	242316	Gdf6	25.0425	-0.718106	0.272492	2.63533	0.00840555	0.0733775
ENSMUSG00000047643	432800	Gm5454	210.389	0.462653	0.175569	-2.63516	0.00840988	0.0733775
ENSMUSG00000035901	19347	Dennd5a	7908.54	-0.30834	0.116983	2.63577	0.00839464	0.0733775
ENSMUSG00000034462	18764	Pkd2	1596.1	-0.35891	0.136233	2.63453	0.00842535	0.0734716
ENSMUSG00000067925	553127	Cxx1a	380.576	-0.433043	0.164385	2.63432	0.00843071	0.0734776
ENSMUSG00000067924	553127	Cxx1b	380.576	-0.433043	0.164385	2.63432	0.00843071	0.0734776
ENSMUSG00000037344	83704	Slc12a9	191.046	0.563966	0.214123	-2.63384	0.00844261	0.0735405
ENSMUSG00000032806	214601	Slc10a3	236.693	-0.437432	0.166205	2.63189	0.00849117	0.0739225
ENSMUSG00000000088	12858	Cox5a	8876.06	-0.377112	0.143429	2.62926	0.00855713	0.0743321
ENSMUSG00000061099	14447	Gapdhs	32.7967	0.661457	0.251554	-2.62948	0.00855153	0.0743321
ENSMUSG00000020752	170472	Recql5	341.16	0.410594	0.156163	-2.62926	0.00855702	0.0743321
ENSMUSG00000060703	66205	Cd302	431.383	-0.40991	0.155968	2.62817	0.00858458	0.0744882
ENSMUSG00000020381	68067	3010026O09Rik	72.9741	0.55958	0.212915	-2.62818	0.00858435	0.0744882
ENSMUSG00000028194	69219	Ddah1	127.537	-0.602777	0.229442	2.62714	0.00861051	0.0745957
ENSMUSG00000042251	212933	Pm20d1	303.603	0.438022	0.166746	-2.62689	0.00861688	0.0745957
ENSMUSG00000073557	329251	Ppp1r12b	4055.74	0.262112	0.0997611	-2.6274	0.00860397	0.0745957
ENSMUSG00000029862	12723	Clcn1	648.701	0.584566	0.222544	-2.62674	0.00862071	0.0745957
ENSMUSG00000045875	11549	Adra1a	48.1386	-0.651664	0.248058	2.62706	0.0086126	0.0745957
ENSMUSG00000037815	12385	Ctnna1	17599.5	-0.3025	0.115186	2.62617	0.00863508	0.0746789
ENSMUSG00000021765	14313	Fst	49.1379	-0.66063	0.251654	2.62516	0.00866089	0.0748609
ENSMUSG00000043987	214552	Cep164	426.164	0.348337	0.132734	-2.62431	0.00868239	0.0749815
ENSMUSG00000089989	14256	Flt3l	178.645	0.516615	0.19711	-2.62095	0.00876849	0.0756661
ENSMUSG00000027006	66861	Dnajc10	3849.04	-0.35712	0.136313	2.61985	0.00879674	0.0758682
ENSMUSG00000022265	11732	Ank	3786.37	-0.340749	0.130086	2.61942	0.00880803	0.075922
ENSMUSG00000038722	231889	Bud31	377.716	-0.379269	0.144809	2.61909	0.00881639	0.075922
ENSMUSG00000046876	20238	Atxn1	2192.21	0.343322	0.131096	-2.61887	0.00882221	0.075922
ENSMUSG00000024687	76303	Osbp	3802.39	0.306702	0.117113	-2.61886	0.0088223	0.075922
ENSMUSG00000031157	54633	Pqbp1	439.001	-0.404758	0.154602	2.61807	0.0088428	0.0760568
ENSMUSG00000071103	69479	1700029J07Rik	60.1717	0.593311	0.226774	-2.61631	0.00888865	0.0764093
ENSMUSG00000012428	117167	Steap4	861.042	-0.32645	0.124815	2.61546	0.00891063	0.0765146
ENSMUSG00000056342	17847	Usp34	4473.97	0.353395	0.135145	-2.61493	0.00892449	0.0765917
ENSMUSG00000020120	56193	Plek	369.201	-0.397983	0.152237	2.61422	0.00894304	0.0767091
ENSMUSG00000059408	80978	Mrgprh	137.926	0.451308	0.17276	-2.61235	0.0089923	0.0770474
ENSMUSG00000030934	18242	Oat	7261.19	-0.327139	0.12529	2.61105	0.00902656	0.0772567
ENSMUSG00000052137	77604	C430048L16Rik	212.591	0.453742	0.173777	-2.61107	0.009026	0.0772567
ENSMUSG00000044080	20193	S100a1	6086.07	-0.326106	0.124909	2.61075	0.00903442	0.0772819
ENSMUSG00000026723	13434	Trdmt1	251.034	-0.478319	0.183264	2.61	0.00905416	0.0774086
ENSMUSG00000045427	56258	Hnrnph2	976.565	-0.343012	0.131437	2.60972	0.0090617	0.077431
ENSMUSG00000046168	328424	Kcnrg	64.9959	0.623438	0.239046	-2.60803	0.00910661	0.0777302
ENSMUSG00000043019	66967	Edem3	2368.55	-0.344529	0.132123	2.60764	0.00911686	0.0777754
ENSMUSG00000039686	227693	Zer1	1127.33	0.409267	0.156975	-2.60722	0.00912813	0.0778293
ENSMUSG00000032540	67469	Abhd5	1377.72	-0.301631	0.115706	2.60686	0.00913763	0.0778681
ENSMUSG00000020300	67579	Cpeb4	1169.1	0.430298	0.165093	-2.6064	0.00914999	0.0779311
ENSMUSG00000038126	269702	Mphosph9	435.741	0.412481	0.158276	-2.60608	0.00915853	0.0779616
ENSMUSG00000064128	219103	Cenpj	198.868	0.485335	0.186251	-2.60582	0.00916554	0.0779791
ENSMUSG00000014932	22612	Yes1	1024.27	-0.411406	0.157948	2.6047	0.00919553	0.0781918
ENSMUSG00000062070	18655	Pgk1	305.118	-0.433097	0.166299	2.60433	0.00920552	0.0782345
ENSMUSG00000033486	212670	Catsper2	103.047	0.52081	0.200005	-2.60398	0.00921473	0.0782704
ENSMUSG00000021057	238276	Akap5	89.3186	0.698921	0.268501	-2.60305	0.00923992	0.078442
ENSMUSG00000059149	213006	Mfsd4	510.171	0.369595	0.14201	-2.6026	0.00925202	0.0785023
ENSMUSG00000058267	64659	Mrps14	529.893	-0.433599	0.166669	2.60156	0.00928016	0.0786985
ENSMUSG00000021241	74316	Isca2	828.23	-0.416113	0.159974	2.60112	0.00929191	0.0787557
ENSMUSG00000047565	64833	Acot10	135.1	-0.469026	0.180383	2.60016	0.00931805	0.0788496
ENSMUSG00000039462	12813	Col10a1	73.8836	0.667476	0.256694	-2.60028	0.00931489	0.0788496
ENSMUSG00000021072	72736	Tmx1	629.736	-0.41129	0.158164	2.6004	0.00931152	0.0788496
ENSMUSG00000046756	50529	Mrps7	1005.68	-0.312569	0.120231	2.59973	0.00932962	0.0788868
ENSMUSG00000031447	16783	Lamp1	10276.1	-0.290461	0.11174	2.59944	0.0093375	0.0788868
ENSMUSG00000027639	56045	Samhd1	776.168	0.329048	0.126646	-2.59817	0.0093721	0.0790159
ENSMUSG00000025823	12304	Pdia4	1705.4	-0.278605	0.107232	2.59814	0.00937289	0.0790159
ENSMUSG00000030095	74122	Tmem43	805.943	-0.341662	0.131497	2.59825	0.00937002	0.0790159
ENSMUSG00000030062	103963	Rpn1	2354.8	-0.316764	0.121918	2.59818	0.00937184	0.0790159
ENSMUSG00000054387	17248	Mdm4	934.634	0.4176	0.160785	-2.59726	0.00939709	0.0791774
ENSMUSG00000045658	98496	Pid1	454.077	-0.394662	0.152037	2.59584	0.00943605	0.0794205
ENSMUSG00000087651	69784	1500009L16Rik	34.0262	-0.656757	0.253053	2.59533	0.00944999	0.0794953
ENSMUSG00000036943	235442	Rab8b	935.778	-0.358204	0.13803	2.59511	0.00945599	0.0795031
ENSMUSG00000040234	67623	Tm7sf3	1328.43	-0.290853	0.112107	2.59441	0.00947533	0.0795381
ENSMUSG00000048856	104910	Slc25a47	50.4338	0.686071	0.264568	-2.59317	0.00950949	0.0797822
ENSMUSG00000040016	19218	Ptger3	6.94661	-0.675701	0.260791	2.59097	0.00957054	0.0801272
ENSMUSG00000037260	52120	Hgsnat	702.692	-0.328965	0.126959	2.5911	0.00956687	0.0801272
ENSMUSG00000033184	66676	Tmed7	2541.57	-0.38182	0.147356	2.59114	0.00956594	0.0801272
ENSMUSG00000021693	16563	Kif2a	559.936	0.415726	0.160453	-2.59095	0.009571	0.0801272
ENSMUSG00000048445	71276	Ccdc57	90.0271	0.518747	0.200304	-2.5898	0.00960323	0.0803259
ENSMUSG00000038967	18604	Pdk2	4169.5	0.516458	0.199425	-2.58974	0.00960497	0.0803259
ENSMUSG00000001847	19353	Rac1	3835.07	-0.341659	0.131951	2.58928	0.00961782	0.0803906
ENSMUSG00000045160	78653	Bola3	762.468	-0.500266	0.193304	2.58797	0.00965428	0.0806097
ENSMUSG00000031766	20497	Slc12a3	17.4847	0.71574	0.276617	-2.58747	0.00966834	0.0806735
ENSMUSG00000063060	20680	Sox7	447.953	0.526501	0.203492	-2.58733	0.00967219	0.0806735
ENSMUSG00000017692	246104	Rhbdl3	1743.65	0.433934	0.167809	-2.58588	0.00971321	0.0809726
ENSMUSG00000022766	15160	Serpind1	38.9369	0.71461	0.276375	-2.58566	0.00971932	0.0809806
ENSMUSG00000015165	15388	Hnrnpl	2904.96	-0.336234	0.130048	2.58547	0.00972471	0.0809826
ENSMUSG00000020107	52717	Anapc16	847.481	-0.31447	0.121658	2.58486	0.00974174	0.0810814
ENSMUSG00000039623	231855	C330006K01Rik	183.452	0.458793	0.177511	-2.58459	0.0097495	0.081103
ENSMUSG00000002020	16997	Ltbp2	120.21	-0.696217	0.269392	2.5844	0.00975482	0.0811043
ENSMUSG00000039349	226777	C130074G19Rik	694.714	-0.356388	0.137994	2.58263	0.00980497	0.0814782
ENSMUSG00000042942	381157	Greb1l	300.904	0.42172	0.163311	-2.58232	0.00981385	0.0815089
ENSMUSG00000026728	22352	Vim	10014.1	-0.364286	0.141089	2.58195	0.00982432	0.0815528
ENSMUSG00000025185	67573	Loxl4	176.789	0.530321	0.205449	-2.58127	0.00984364	0.08167
ENSMUSG00000037224	231125	Zfyve28	79.3783	0.578502	0.224174	-2.5806	0.00986295	0.0817305
ENSMUSG00000019810	66848	Fuca2	2498.86	-0.358822	0.139062	2.58029	0.00987174	0.0817305
ENSMUSG00000037321	21354	Tap1	301.332	0.475115	0.184129	-2.58034	0.00987044	0.0817305
ENSMUSG00000029328	50926	Hnrpdl	1831.73	-0.459733	0.178147	2.58064	0.00986166	0.0817305
ENSMUSG00000047123	106759	Ticam1	327.236	0.476999	0.184914	-2.57957	0.00989221	0.0818569
ENSMUSG00000022758	18440	P2rx6	143.729	0.520674	0.201918	-2.57863	0.00991917	0.0820367
ENSMUSG00000028843	73723	Sh3bgrl3	256.072	-0.434768	0.168653	2.57788	0.0099408	0.0821724
ENSMUSG00000051344	241075	Plekhm3	898.958	0.347967	0.135018	-2.57719	0.00996074	0.0822939
ENSMUSG00000029430	19384	Ran	678.021	-0.349863	0.135796	2.57639	0.00998371	0.0823538
ENSMUSG00000033458	330554	Fan1	325.566	0.402756	0.15632	-2.57649	0.00998094	0.0823538
ENSMUSG00000033016	18018	Nfatc1	926.746	0.570282	0.221374	-2.5761	0.00999223	0.0823808
ENSMUSG00000024327	14977	Slc39a7	2753.06	-0.349543	0.135707	2.57571	0.0100033	0.082429
ENSMUSG00000024902	66419	Mrpl11	772.062	-0.331197	0.128877	2.56988	0.0101734	0.0837424
ENSMUSG00000079260	100504715	Glb1	365.539	0.404424	0.157407	-2.56929	0.0101908	0.0837984
ENSMUSG00000027624	13821	Epb4.1l1	748.736	0.319462	0.124404	-2.56794	0.0102303	0.083998
ENSMUSG00000019849	19072	Prep	953.848	-0.309224	0.120417	2.56794	0.0102305	0.083998
ENSMUSG00000047187	59021	Rab2a	4559.44	-0.3736	0.145487	2.56792	0.0102311	0.083998
ENSMUSG00000015189	213819	Casd1	1544.22	-0.423445	0.164927	2.56747	0.0102444	0.0840629
ENSMUSG00000039005	21898	Tlr4	1348.92	-0.485178	0.189072	2.5661	0.0102848	0.0843062
ENSMUSG00000012609	320244	Ttll5	680.682	0.33507	0.130651	-2.56462	0.0103289	0.0845357
ENSMUSG00000020361	15525	Hspa4	6641.12	-0.31611	0.123241	2.56497	0.0103186	0.0845357
ENSMUSG00000024069	210148	Slc30a6	233.643	-0.406657	0.158562	2.56466	0.0103278	0.0845357
ENSMUSG00000070666	435811	Ldlrad2	18.4639	0.718935	0.280358	-2.56434	0.0103371	0.0845585
ENSMUSG00000044162	414084	Tnip3	67.8096	0.647444	0.252774	-2.56135	0.0104265	0.0852457
ENSMUSG00000005045	269610	Chd5	38.1571	0.697897	0.272549	-2.56063	0.0104483	0.0853794
ENSMUSG00000037710	52637	Cisd1	2310.26	-0.326757	0.127629	2.5602	0.0104611	0.0853956
ENSMUSG00000040270	12014	Bach2	223.793	0.462167	0.180517	-2.56024	0.01046	0.0853956
ENSMUSG00000032562	14678	Gnai2	2962.97	-0.327657	0.128007	2.55968	0.0104769	0.0854355
ENSMUSG00000032306	110119	Mpi	1700.96	-0.35061	0.136973	2.55969	0.0104764	0.0854355
ENSMUSG00000031954	23837	Cfdp1	838.307	-0.322271	0.125986	2.558	0.0105276	0.08576
ENSMUSG00000004018	67030	Fancl	217.518	-0.406711	0.1591	2.55632	0.0105786	0.0860132
ENSMUSG00000001521	22158	Tulp3	229.631	0.392111	0.15338	-2.55646	0.0105743	0.0860132
ENSMUSG00000068523	14707	Gng5	217.284	-0.400469	0.156684	2.55589	0.0105915	0.0860132
ENSMUSG00000017721	78928	Pigt	800.129	-0.369988	0.14475	2.55605	0.0105868	0.0860132
ENSMUSG00000032932	110920	Hspa13	1042.14	-0.375827	0.147037	2.55601	0.0105881	0.0860132
ENSMUSG00000036523	268527	Greb1	35.9179	0.685358	0.26807	-2.55663	0.0105691	0.0860132
ENSMUSG00000029094	70292	Afap1	1164.42	0.296278	0.115957	-2.55507	0.0106166	0.0861305
ENSMUSG00000024683	94063	Mrpl16	775.075	-0.329129	0.128815	2.55506	0.010617	0.0861305
ENSMUSG00000040481	207165	Bptf	3601.67	0.315097	0.12338	-2.55386	0.0106535	0.0863824
ENSMUSG00000038375	68728	Trp53inp2	9463.47	0.273562	0.107171	-2.55257	0.010693	0.086658
ENSMUSG00000029082	12182	Bst1	488.662	-0.564217	0.221172	2.55103	0.0107405	0.0869327
ENSMUSG00000050856	11958	Atp5k	4475.59	-0.367929	0.144233	2.55093	0.0107435	0.0869327
ENSMUSG00000036931	243910	Nfkbid	23.0645	0.717945	0.281417	-2.55118	0.0107358	0.0869327
ENSMUSG00000061143	433586	Maml3	295.732	0.404648	0.15868	-2.55008	0.0107697	0.0870996
ENSMUSG00000090035	14426	Galnt4	365.471	-0.376895	0.147833	2.54947	0.0107886	0.0872078
ENSMUSG00000016386	77015	Mpped2	45.1766	0.632612	0.248207	-2.54873	0.0108117	0.0873492
ENSMUSG00000037685	11980	Atp8a1	2531.75	0.403875	0.158528	-2.54765	0.010845	0.0875695
ENSMUSG00000060657	223989	4921513D23Rik	3044.35	0.326416	0.128132	-2.54749	0.0108501	0.0875695
ENSMUSG00000029836	12417	Cbx3	104.239	-0.484014	0.190065	2.54657	0.0108788	0.0877563
ENSMUSG00000059647	12417	Gm10068	104.239	-0.484014	0.190065	2.54657	0.0108788	0.0877563
ENSMUSG00000057886	12417	Gm6984	104.239	-0.484014	0.190065	2.54657	0.0108788	0.0877563
ENSMUSG00000031723	234723	Txnl4b	105.903	-0.576185	0.226486	2.54402	0.0109584	0.0882626
ENSMUSG00000039801	73692	2410089E03Rik	897.765	0.368849	0.145013	-2.54357	0.0109727	0.0882871
ENSMUSG00000004789	78920	Dlst	11213.8	-0.333352	0.131169	2.54139	0.0110411	0.088747
ENSMUSG00000029207	11787	Apbb2	2818.63	0.29799	0.117288	-2.54067	0.011064	0.0888624
ENSMUSG00000037270	229227	4932438A13Rik	6384.41	0.378754	0.149081	-2.54058	0.0110668	0.0888624
ENSMUSG00000038740	72543	Fam125b	701.171	0.341498	0.134433	-2.54028	0.0110763	0.0888932
ENSMUSG00000067081	208372	Asb18	188.959	0.510469	0.201065	-2.53882	0.0111226	0.0891199
ENSMUSG00000024331	13506	Dsc2	6981.61	0.364184	0.143454	-2.53868	0.0111272	0.0891199
ENSMUSG00000045761	320159	Fam179a	223.543	0.479873	0.188998	-2.53904	0.0111157	0.0891199
ENSMUSG00000023473	107934	Celsr3	87.3128	0.504829	0.19885	-2.53874	0.0111253	0.0891199
ENSMUSG00000035678	21950	Tnfsf9	11.6201	0.713774	0.281294	-2.53747	0.0111659	0.0893382
ENSMUSG00000028394	59001	Pole3	191.733	-0.457123	0.180145	2.53753	0.0111637	0.0893382
ENSMUSG00000040124	98376	Gorab	144.607	-0.443637	0.174873	2.5369	0.0111838	0.0894365
ENSMUSG00000006587	30927	Snai3	28.7237	0.700298	0.276071	-2.53666	0.0111916	0.089453
ENSMUSG00000059447	231086	Hadhb	1701.89	-0.341372	0.134593	2.53633	0.0112022	0.0894926
ENSMUSG00000027381	12125	Bcl2l11	424.529	0.500581	0.19739	-2.536	0.0112127	0.089531
ENSMUSG00000074622	16658	Mafb	454.704	0.498548	0.196619	-2.5356	0.0112255	0.089538
ENSMUSG00000044876	72667	Zfp444	157.607	0.49139	0.193797	-2.5356	0.0112255	0.089538
ENSMUSG00000041530	236511	Eif2c1	1315.33	0.308465	0.121677	-2.53513	0.0112407	0.0895722
ENSMUSG00000074457	67860	S100a16	946.787	-0.381016	0.150428	2.53287	0.0113131	0.0901037
ENSMUSG00000054083	60594	Capn12	11.9894	0.709115	0.280092	-2.53172	0.0113503	0.0902697
ENSMUSG00000034021	100710	Pds5b	1865.25	0.350618	0.138479	-2.53192	0.0113439	0.0902697
ENSMUSG00000038619	56205	Ensa	2928.6	-0.262068	0.103515	2.5317	0.0113512	0.0902697
ENSMUSG00000026825	13429	Dnm1	426.975	0.404801	0.159987	-2.53021	0.0113993	0.0905785
ENSMUSG00000048970	59048	C1galt1c1	363.906	-0.353964	0.139899	2.53014	0.0114016	0.0905785
ENSMUSG00000070280	382113	Slc22a14	16.9531	-0.710094	0.280784	2.52897	0.0114398	0.0908359
ENSMUSG00000043998	217664	Mgat2	865.339	-0.303134	0.119873	2.52879	0.0114455	0.0908359
ENSMUSG00000054003	74691	Tdrd9	51.2957	0.672054	0.265941	-2.52708	0.0115017	0.0911435
ENSMUSG00000074182	229937	Znhit6	141.327	0.457789	0.181149	-2.52715	0.0114994	0.0911435
ENSMUSG00000071037	73582	1700106N22Rik	52.223	0.587625	0.232502	-2.5274	0.011491	0.0911435
ENSMUSG00000042408	100177	Zmym6	598.712	0.399913	0.158312	-2.5261	0.0115336	0.0912623
ENSMUSG00000024245	68027	Tmem178	14.9458	-0.71211	0.281903	2.52609	0.0115341	0.0912623
ENSMUSG00000022952	12394	Runx1	87.0066	0.588331	0.232991	-2.52513	0.0115657	0.0914661
ENSMUSG00000020898	68964	1500010J02Rik	637.191	0.313091	0.124056	-2.52378	0.01161	0.0917706
ENSMUSG00000057337	53374	Chst3	62.7406	-0.634196	0.251391	2.52275	0.011644	0.0919931
ENSMUSG00000078866	628308	Gm14420	1197.83	-0.354301	0.14046	2.52243	0.0116547	0.0920314
ENSMUSG00000049382	16691	Krt8	94.2747	0.663127	0.262911	-2.52224	0.0116609	0.0920335
ENSMUSG00000045038	18754	Prkce	837.36	0.361463	0.143346	-2.52162	0.0116816	0.0921512
ENSMUSG00000021771	22334	Vdac2	7238.67	-0.294653	0.116903	2.52049	0.0117192	0.092386
ENSMUSG00000073680	320587	Tmem88b	24.2166	0.707818	0.280839	-2.52037	0.0117232	0.092386
ENSMUSG00000036395	244757	Glb1l2	33.7077	-0.698488	0.277187	2.51991	0.0117384	0.0924601
ENSMUSG00000012705	57264	Retn	22.0237	-0.694307	0.275597	2.51928	0.0117594	0.0925785
ENSMUSG00000046807	192734	AI646023	120.127	0.547006	0.217175	-2.51874	0.0117776	0.0926755
ENSMUSG00000040170	55990	Fmo2	3672.58	-0.539251	0.214172	2.51784	0.0118078	0.0928481
ENSMUSG00000038068	218215	Rnf144b	920.155	-0.359035	0.142603	2.51773	0.0118113	0.0928481
ENSMUSG00000037709	58909	Fam13a	737.215	-0.388624	0.154373	2.51744	0.0118212	0.0928789
ENSMUSG00000028545	67621	Bend5	63.3104	-0.53107	0.211009	2.51681	0.0118423	0.0929188
ENSMUSG00000026640	18845	Plxna2	2662.57	-0.3778	0.150114	2.51676	0.011844	0.0929188
ENSMUSG00000043017	19222	Ptgir	215.674	0.477021	0.189512	-2.5171	0.0118324	0.0929188
ENSMUSG00000015932	56431	Dstn	4206.1	-0.391988	0.155841	2.5153	0.0118931	0.0932572
ENSMUSG00000030732	69121	Chrdl2	21.8853	0.699396	0.278146	-2.51449	0.0119204	0.0934142
ENSMUSG00000026039	68549	Sgol2	113.496	0.616776	0.245302	-2.51436	0.011925	0.0934142
ENSMUSG00000039652	208922	Cpeb3	1833.29	0.33263	0.132333	-2.51357	0.0119515	0.0935752
ENSMUSG00000026766	109129	Mmadhc	1572.02	-0.275896	0.109806	2.51258	0.0119851	0.0937447
ENSMUSG00000027996	20319	Sfrp2	72.8863	-0.553657	0.220352	2.51261	0.0119842	0.0937447
ENSMUSG00000002733	83435	Plekha3	963.278	-0.382728	0.152506	2.50959	0.012087	0.0944483
ENSMUSG00000054517	338364	Trim65	249.481	0.450886	0.179665	-2.50959	0.012087	0.0944483
ENSMUSG00000027784	242083	Ppm1l	1058.2	0.296868	0.11831	-2.50924	0.0120991	0.0944489
ENSMUSG00000061028	53609	Clasrp	354.933	0.399948	0.159383	-2.50935	0.0120954	0.0944489
ENSMUSG00000024679	68774	Ms4a6d	125.343	-0.489164	0.194967	2.50896	0.0121088	0.0944778
ENSMUSG00000036856	22417	Wnt4	30.8532	0.653092	0.260346	-2.50856	0.0121226	0.0945383
ENSMUSG00000035642	66273	1810020D17Rik	609.845	-0.317639	0.126662	2.50776	0.0121498	0.0945628
ENSMUSG00000025781	11949	Atp5c1	16164.2	-0.27755	0.110672	2.50786	0.0121465	0.0945628
ENSMUSG00000018287	216873	Spag7	1067.27	-0.300724	0.119908	2.50796	0.012143	0.0945628
ENSMUSG00000086564	630146	Cd101	21.745	0.699657	0.278973	-2.50797	0.0121426	0.0945628
ENSMUSG00000048368	27047	Omd	63.751	-0.689996	0.275244	2.50685	0.0121812	0.0947601
ENSMUSG00000026245	23874	Farsb	1275.42	-0.328341	0.131	2.50641	0.0121964	0.0947842
ENSMUSG00000039956	77037	Mrap	79.9447	-0.571324	0.227945	2.50641	0.0121963	0.0947842
ENSMUSG00000070803	56222	Cited4	630.313	0.586733	0.234184	-2.50544	0.01223	0.0949985
ENSMUSG00000024012	56462	Mtch1	2971.54	-0.339469	0.135517	2.50499	0.0122455	0.095072
ENSMUSG00000027951	56417	Adar	1124.13	0.365865	0.146124	-2.5038	0.0122869	0.0952991
ENSMUSG00000029823	192196	Luc7l2	2879.79	0.354528	0.141635	-2.50311	0.0123106	0.095436
ENSMUSG00000025287	56360	Acot9	518.15	-0.337167	0.134732	2.5025	0.012332	0.0955076
ENSMUSG00000024337	16912	Psmb9	149.113	0.454328	0.181541	-2.50262	0.0123278	0.0955076
ENSMUSG00000092299	16912	Psmb9	149.113	0.454328	0.181541	-2.50262	0.0123278	0.0955076
ENSMUSG00000003227	13608	Edar	176.848	-0.539825	0.215815	2.50133	0.0123729	0.0957769
ENSMUSG00000022878	11450	Adipoq	70.9755	-0.634671	0.253825	2.50043	0.0124042	0.0959726
ENSMUSG00000007458	17113	M6pr	1310.47	-0.28734	0.114958	2.49951	0.0124365	0.0961398
ENSMUSG00000000753	20317	Serpinf1	1180.23	-0.381422	0.152602	2.49947	0.0124381	0.0961398
ENSMUSG00000037129	214531	Tmprss13	58.9108	0.703353	0.281535	-2.49828	0.0124797	0.0963834
ENSMUSG00000002847	85031	Pla1a	341.411	-0.480427	0.192308	2.49822	0.0124819	0.0963834
ENSMUSG00000023089	68202	Ndufa5	4646.45	-0.30457	0.12201	2.49628	0.0125505	0.0968656
ENSMUSG00000033446	67168	Lpar6	303.949	-0.431049	0.172695	2.49601	0.01256	0.0968918
ENSMUSG00000054280	215476	C330019G07Rik	1032.09	0.296059	0.118623	-2.49579	0.0125676	0.0969022
ENSMUSG00000021967	67840	Mrp63	376.792	-0.351308	0.140812	2.49487	0.0126005	0.0971082
ENSMUSG00000043243	100037278	Fam129c	52.7665	0.63192	0.253446	-2.49331	0.0126558	0.0974391
ENSMUSG00000034401	67946	Spata6	337.852	-0.399169	0.160118	2.49297	0.0126681	0.0974862
ENSMUSG00000051079	246709	Rgs13	13.6526	0.660006	0.264794	-2.49252	0.012684	0.0975604
ENSMUSG00000028597	67305	Gpx7	258.489	-0.424492	0.170409	2.49102	0.0127377	0.0977348
ENSMUSG00000049537	243078	Tecrl	1455.7	-0.37938	0.152287	2.49122	0.0127306	0.0977348
ENSMUSG00000037239	101809	Spred3	50.343	0.568434	0.228181	-2.49115	0.0127329	0.0977348
ENSMUSG00000021876	58809	Rnase4	1938.05	-0.369105	0.148172	2.49105	0.0127367	0.0977348
ENSMUSG00000025269	77622	Apex2	106.042	0.523226	0.21007	-2.49072	0.0127485	0.0977697
ENSMUSG00000020358	15384	Hnrnpab	2948.38	-0.287895	0.115605	2.49033	0.0127624	0.0978287
ENSMUSG00000001018	20615	Snapin	1188.24	-0.354023	0.142202	2.48957	0.0127896	0.0979891
ENSMUSG00000067851	211673	Arfgef1	9735.87	0.296258	0.119024	-2.48907	0.0128078	0.098081
ENSMUSG00000028152	56224	Tspan5	467.318	-0.460008	0.184859	2.48842	0.012831	0.0981304
ENSMUSG00000036968	66455	Cnpy4	281.952	-0.399996	0.160726	2.48868	0.0128218	0.0981304
ENSMUSG00000060450	56736	Rnf14	3234.64	-0.295963	0.118939	2.48837	0.012833	0.0981304
ENSMUSG00000001520	60345	Nrip2	85.3686	0.535201	0.215178	-2.48724	0.0128738	0.0983942
ENSMUSG00000031578	67920	Mak16	350.578	-0.370899	0.149151	2.48674	0.0128919	0.0984847
ENSMUSG00000030359	11287	Pzp	158.251	0.461713	0.185697	-2.48637	0.0129053	0.0985392
ENSMUSG00000062580	21854	Timm17a	1410.14	-0.354262	0.142523	2.48564	0.012932	0.0986951
ENSMUSG00000063849	66812	Ppcdc	203.57	0.458057	0.1843	-2.48539	0.0129409	0.0987153
ENSMUSG00000040225	226562	Prrc2c	5089.05	0.349076	0.140483	-2.48483	0.0129613	0.098775
ENSMUSG00000038784	53621	Cnot4	904.131	0.375394	0.151066	-2.48497	0.0129564	0.098775
ENSMUSG00000028842	214150	Eif2c3	1082.26	0.34143	0.137445	-2.48412	0.0129872	0.0989245
ENSMUSG00000038957	353190	Edc3	270.453	0.425658	0.171503	-2.48193	0.0130672	0.0993893
ENSMUSG00000040950	216864	Mgl2	250.67	-0.424572	0.17112	2.48114	0.0130963	0.0995624
ENSMUSG00000029128	100972	Rab28	1973.05	-0.301261	0.121457	2.4804	0.0131235	0.0996244
ENSMUSG00000078676	192160	Casc3	688.729	0.394705	0.159126	-2.48046	0.0131213	0.0996244
ENSMUSG00000032599	76500	Ip6k2	285.648	-0.403781	0.162787	2.48043	0.0131224	0.0996244
ENSMUSG00000024483	108857	Ankhd1	3180.27	0.334648	0.134967	-2.47948	0.0131573	0.0998329
ENSMUSG00000000605	12727	Clcn4-2	3143.42	-0.267638	0.10799	2.47837	0.0131985	0.100049
ENSMUSG00000028420	52076	Tmem38b	402.254	0.323939	0.130729	-2.47795	0.0132141	0.100118
ENSMUSG00000030699	21389	Tbx6	39.2038	0.604649	0.244078	-2.47727	0.0132391	0.100182
ENSMUSG00000007656	59046	Arpp19	1494.07	-0.352439	0.142254	2.47754	0.0132293	0.100182
ENSMUSG00000079002	223665	C030006K11Rik	615.504	-0.319891	0.129143	2.47702	0.0132483	0.100185
ENSMUSG00000050199	107515	Lgr4	1613.83	-0.318894	0.128753	2.47679	0.0132571	0.100203
ENSMUSG00000029594	74111	Rbm19	809.222	-0.370781	0.149759	2.47586	0.0132916	0.100416
ENSMUSG00000051950	381694	B3galtl	287.982	-0.395702	0.159899	2.4747	0.0133349	0.100694
ENSMUSG00000001435	12822	Col18a1	1052.13	-0.400404	0.161841	2.47406	0.0133587	0.100777
ENSMUSG00000026434	98415	Nucks1	3033.59	-0.405114	0.163743	2.47408	0.0133578	0.100777
ENSMUSG00000039787	99151	Cercam	195.724	-0.464524	0.187804	2.47346	0.0133812	0.10085
ENSMUSG00000033863	16601	Klf9	5077.32	-0.561808	0.227133	2.47347	0.0133806	0.10085
ENSMUSG00000031972	11459	Acta1	367.733	-0.674028	0.27253	2.47322	0.0133901	0.100869
ENSMUSG00000042604	16492	Kcna4	363.504	0.528382	0.213666	-2.47294	0.0134008	0.100901
ENSMUSG00000003131	18475	Pafah1b2	1540.43	-0.316946	0.128186	2.47254	0.0134158	0.100965
ENSMUSG00000033308	99586	Dpyd	532.932	0.457114	0.185078	-2.46985	0.013517	0.101484
ENSMUSG00000042632	53357	Pla2g6	318.216	0.434368	0.175865	-2.4699	0.0135151	0.101484
ENSMUSG00000027544	18019	Nfatc2	574.131	0.447073	0.180995	-2.47008	0.0135082	0.101484
ENSMUSG00000034949	103406	Zfr2	172.531	0.505369	0.204576	-2.47033	0.0134989	0.101484
ENSMUSG00000030922	73919	Lyrm1	134.733	-0.466541	0.188855	2.47036	0.0134976	0.101484
ENSMUSG00000025351	12512	Cd63	488.517	0.353231	0.143035	-2.46954	0.0135288	0.101487
ENSMUSG00000027082	21788	Tfpi	4980.43	-0.347144	0.140573	2.4695	0.0135303	0.101487
ENSMUSG00000066036	69116	Ubr4	10629.7	0.377333	0.152943	-2.46715	0.0136192	0.102056
ENSMUSG00000032827	243725	Ppp1r9a	1401.47	0.32314	0.131036	-2.46605	0.0136613	0.102177
ENSMUSG00000036112	56307	Metap2	1640.55	-0.333115	0.13507	2.46623	0.0136543	0.102177
ENSMUSG00000018844	78919	Fndc8	14.8558	0.647888	0.262719	-2.46609	0.0136598	0.102177
ENSMUSG00000049396	622531	Gemin4	33.7006	0.652829	0.264883	-2.4646	0.0137168	0.102465
ENSMUSG00000072974	214321	Gm4787	33.3966	0.639994	0.259682	-2.46453	0.0137194	0.102465
ENSMUSG00000024359	15526	Hspa9	13914.9	-0.30064	0.121987	2.46453	0.0137194	0.102465
ENSMUSG00000078920	15953	Ifi47	74.3043	0.649046	0.263419	-2.46393	0.0137423	0.10249
ENSMUSG00000020085	71361	Aifm2	837.57	-0.340021	0.137995	2.46402	0.013739	0.10249
ENSMUSG00000020773	217333	Trim47	1278.2	-0.449373	0.182371	2.46406	0.0137373	0.10249
ENSMUSG00000031985	14712	Gnpat	6260.84	-0.268807	0.109147	2.4628	0.0137855	0.102618
ENSMUSG00000078667	73545	1700094D03Rik	128.567	0.44388	0.180259	-2.46245	0.0137991	0.10267
ENSMUSG00000030652	12850	Coq7	981.721	-0.355753	0.144585	2.46052	0.0138737	0.103176
ENSMUSG00000042121	231637	Ssh1	420.044	0.39328	0.159925	-2.45915	0.0139264	0.103381
ENSMUSG00000007888	12931	Crlf1	64.9226	-0.65174	0.265013	2.45927	0.0139219	0.103381
ENSMUSG00000019820	22288	Utrn	13818.2	0.265288	0.107879	-2.45913	0.0139276	0.103381
ENSMUSG00000073600	381148	Gm1614	5064.09	0.348924	0.141872	-2.45943	0.0139159	0.103381
ENSMUSG00000018401	170749	Mtmr4	1248.62	0.438061	0.178157	-2.45885	0.0139383	0.103412
ENSMUSG00000037060	109042	Prkcdbp	627.878	-0.332286	0.135177	2.45816	0.0139652	0.10353
ENSMUSG00000032602	57279	Slc25a20	1834.46	-0.37873	0.154074	2.4581	0.0139674	0.10353
ENSMUSG00000028082	27059	Sh3d19	1244.77	-0.335208	0.136391	2.4577	0.0139831	0.103598
ENSMUSG00000060679	69527	Mrps9	1190.75	-0.268317	0.109252	2.45595	0.0140512	0.103955
ENSMUSG00000029591	22256	Ung	250.662	-0.400228	0.163037	2.45483	0.014095	0.104208
ENSMUSG00000052928	269037	Ctif	297.194	0.426384	0.173816	-2.45307	0.0141643	0.104595
ENSMUSG00000025465	93747	Echs1	7041.47	-0.263191	0.107287	2.45314	0.0141614	0.104595
ENSMUSG00000041261	12319	Car8	711.536	-0.480439	0.195866	2.4529	0.0141711	0.104596
ENSMUSG00000024844	23825	Banf1	702.252	-0.334331	0.136322	2.4525	0.0141866	0.104612
ENSMUSG00000079071	381417	Gm14085	47.7097	0.568016	0.231591	-2.45267	0.01418	0.104612
ENSMUSG00000030336	21940	Cd27	27.6621	0.683109	0.278598	-2.45195	0.0142084	0.104625
ENSMUSG00000001150	54387	Mcm3ap	1439.49	0.290891	0.118627	-2.45214	0.0142009	0.104625
ENSMUSG00000000028	12544	Cdc45	68.5354	0.55699	0.227196	-2.45158	0.0142229	0.104684
ENSMUSG00000026750	19177	Psmb7	1783.02	-0.277588	0.113241	2.45131	0.0142339	0.104715
ENSMUSG00000027968	28036	Larp7	597.84	-0.375745	0.153331	2.45055	0.0142639	0.104838
ENSMUSG00000052428	68944	Tmco1	1052.61	-0.343315	0.140092	2.45064	0.0142602	0.104838
ENSMUSG00000068039	21454	Tcp1	4523.19	-0.303589	0.123919	2.44991	0.0142894	0.104976
ENSMUSG00000027253	228357	Lrp4	1608.65	0.294178	0.120138	-2.44866	0.0143388	0.105289
ENSMUSG00000040322	229731	Slc25a24	430.954	-0.369902	0.151098	2.4481	0.0143614	0.105357
ENSMUSG00000054383	70481	Pnma1	17.8896	0.682186	0.278643	-2.44824	0.0143555	0.105357
ENSMUSG00000021614	13003	Vcan	3350.72	-0.491432	0.200768	2.44776	0.0143747	0.105405
ENSMUSG00000015568	16956	Lpl	30860.3	0.51119	0.209018	-2.44567	0.0144584	0.105871
ENSMUSG00000074802	237436	Gas2l3	230.571	-0.55496	0.22691	2.44572	0.0144562	0.105871
ENSMUSG00000091512	56692	Lamtor3	317.911	-0.38965	0.159318	2.44573	0.0144558	0.105871
ENSMUSG00000059039	56692	Gm5900	317.911	-0.38965	0.159318	2.44573	0.0144558	0.105871
ENSMUSG00000042032	108645	Mat2b	2643.19	-0.280148	0.114631	2.44391	0.014529	0.106321
ENSMUSG00000073858	319622	Itpripl2	2272.2	-0.267865	0.10961	2.4438	0.0145334	0.106321
ENSMUSG00000047459	67068	Dynlrb1	1273.66	-0.306365	0.125383	2.44342	0.0145486	0.106383
ENSMUSG00000025019	212391	Lcor	372.536	0.396738	0.162396	-2.44303	0.0145644	0.106449
ENSMUSG00000023764	78887	Sfi1	190.419	0.508557	0.208227	-2.44231	0.0145935	0.106562
ENSMUSG00000034639	74729	Setmar	65.6887	-0.526642	0.21563	2.44234	0.0145925	0.106562
ENSMUSG00000049969	71801	Plekhf2	381.259	-0.374413	0.153322	2.44201	0.0146057	0.106602
ENSMUSG00000032398	330959	Snapc5	411.41	-0.368517	0.150957	2.44121	0.0146381	0.106789
ENSMUSG00000066150	20529	Slc31a1	800.884	-0.322717	0.132232	2.44053	0.0146656	0.106791
ENSMUSG00000026817	11636	Ak1	10135.4	-0.327708	0.134268	2.4407	0.0146589	0.106791
ENSMUSG00000027861	12373	Casq2	16745.1	-0.549956	0.225323	2.44075	0.0146569	0.106791
ENSMUSG00000030935	20216	Acsm3	11.9477	-0.688108	0.281914	2.44084	0.014653	0.106791
ENSMUSG00000060594	244864	Layn	242.97	-0.390813	0.160176	2.43991	0.0146911	0.106877
ENSMUSG00000031657	234549	Heatr3	982.882	-0.292882	0.120033	2.44001	0.0146867	0.106877
ENSMUSG00000056458	26448	Stk30	35.3699	0.615364	0.252229	-2.4397	0.0146994	0.106889
ENSMUSG00000028003	79235	Lrat	17.3826	-0.687255	0.28177	2.43906	0.0147254	0.106979
ENSMUSG00000053965	242202	Pde5a	505.19	-0.402503	0.165053	2.43863	0.0147429	0.107056
ENSMUSG00000023951	22339	Vegfa	3942.89	0.347432	0.142507	-2.43801	0.0147685	0.107143
ENSMUSG00000061273	236792	Mmgt1	1485.09	-0.39325	0.161299	2.43802	0.0147681	0.107143
ENSMUSG00000004609	12489	Cd33	103.312	0.46777	0.191896	-2.43762	0.0147843	0.107208
ENSMUSG00000039640	56282	Mrpl12	633.914	-0.394416	0.16184	2.43707	0.0148068	0.107321
ENSMUSG00000005947	16407	Itgae	19.5433	0.669158	0.274604	-2.43681	0.0148174	0.107321
ENSMUSG00000030562	50490	Nox4	110.684	-0.530523	0.217719	2.43674	0.0148203	0.107321
ENSMUSG00000079941	12859	Gm11273	1071.93	-0.288659	0.118504	2.43587	0.0148561	0.10751
ENSMUSG00000061518	12859	Cox5b	1071.93	-0.288659	0.118504	2.43587	0.0148561	0.10751
ENSMUSG00000021996	13885	Esd	1008.14	-0.324727	0.133316	2.43577	0.0148601	0.10751
ENSMUSG00000041890	26431	Git2	1033.83	0.353344	0.145093	-2.43529	0.01488	0.107555
ENSMUSG00000026196	12021	Bard1	71.2361	0.5594	0.229845	-2.43382	0.0149405	0.107596
ENSMUSG00000030342	12527	Cd9	1357.76	-0.461742	0.189715	2.43388	0.0149381	0.107596
ENSMUSG00000024099	72900	Ndufv2	8321.72	-0.363169	0.149216	2.43385	0.0149391	0.107596
ENSMUSG00000019214	214901	Chtf18	41.3309	0.614325	0.25239	-2.43403	0.0149319	0.107596
ENSMUSG00000036323	66661	Srp72	1799.25	-0.320561	0.131691	2.43419	0.0149251	0.107596
ENSMUSG00000001173	320634	Ocrl	766.409	0.322422	0.132418	-2.43487	0.014897	0.107596
ENSMUSG00000066637	75516	Ttc32	177.352	-0.418863	0.172071	2.43424	0.014923	0.107596
ENSMUSG00000028820	71514	Sfpq	2607.45	0.335546	0.13789	-2.43343	0.0149566	0.107613
ENSMUSG00000030423	66161	Pop4	197.703	-0.416707	0.171236	2.43352	0.0149528	0.107613
ENSMUSG00000035849	268481	Krt222	930.638	-0.541097	0.222399	2.433	0.0149742	0.107691
ENSMUSG00000019210	11973	Atp6v1e1	2309.11	-0.315249	0.129605	2.43238	0.0150002	0.107713
ENSMUSG00000054256	17690	Msi1	19.6365	0.666983	0.274167	-2.43276	0.0149843	0.107713
ENSMUSG00000024091	30960	Vapa	1978.75	-0.315156	0.129618	2.43142	0.0150397	0.107713
ENSMUSG00000035504	70335	Reep6	17.4665	0.684649	0.281601	-2.43128	0.0150458	0.107713
ENSMUSG00000032036	67703	Kirrel3	45.2354	0.586273	0.241055	-2.43211	0.0150112	0.107713
ENSMUSG00000024806	77836	Mlana	666.244	0.344799	0.141802	-2.43155	0.0150344	0.107713
ENSMUSG00000021975	210925	Ints9	242.117	0.374128	0.153861	-2.4316	0.0150323	0.107713
ENSMUSG00000061079	20841	Zfp143	579.553	-0.358463	0.1474	2.4319	0.0150199	0.107713
ENSMUSG00000002015	27061	Bcap31	1238.1	-0.318102	0.130766	2.4326	0.014991	0.107713
ENSMUSG00000039577	260305	Nphp4	63.2279	0.594128	0.244358	-2.43138	0.0150414	0.107713
ENSMUSG00000036295	16981	Lrrn3	47.2346	0.650606	0.267645	-2.43085	0.0150634	0.10779
ENSMUSG00000031714	14388	Gab1	2496.23	0.38638	0.158993	-2.43017	0.0150917	0.107931
ENSMUSG00000022894	23794	Adamts5	1792.57	-0.373389	0.153821	2.42743	0.0152061	0.108662
ENSMUSG00000034903	319876	Cobll1	2794.17	0.48517	0.199883	-2.42727	0.0152129	0.108662
ENSMUSG00000010097	53319	Nxf1	1177.55	0.309994	0.127743	-2.4267	0.015237	0.108784
ENSMUSG00000026064	19243	Ptp4a1	314.55	-0.463186	0.190949	2.4257	0.0152788	0.109027
ENSMUSG00000022200	66629	Golph3	2720.58	-0.35372	0.145831	2.42556	0.0152849	0.109027
ENSMUSG00000033186	76789	Mzt1	874.948	-0.375682	0.154941	2.42468	0.0153217	0.10924
ENSMUSG00000022090	213019	Pdlim2	303.051	-0.383828	0.158314	2.42448	0.0153304	0.109253
ENSMUSG00000021638	18260	Ocln	135.323	-0.476876	0.196735	2.42396	0.0153524	0.10936
ENSMUSG00000068882	20823	Ssb	1572.34	-0.333367	0.137575	2.42317	0.0153857	0.109547
ENSMUSG00000028641	56401	Lepre1	984.062	-0.300879	0.124181	2.4229	0.0153972	0.10958
ENSMUSG00000022856	66664	Tmem41a	221.075	0.376951	0.155628	-2.42212	0.0154301	0.109764
ENSMUSG00000020225	68212	Tmbim4	997.372	-0.326764	0.134948	2.42141	0.0154604	0.109848
ENSMUSG00000049551	14371	Fzd9	29.4833	0.622232	0.256977	-2.42135	0.0154629	0.109848
ENSMUSG00000037703	241638	Prosapip1	424.302	0.365428	0.150904	-2.42159	0.0154527	0.109848
ENSMUSG00000060568	226610	Fam78b	199.834	0.497858	0.20563	-2.42114	0.015472	0.109863
ENSMUSG00000040048	68342	Ndufb10	6658.31	-0.322698	0.133319	2.4205	0.0154992	0.10996
ENSMUSG00000031445	66901	Proz	33.2377	0.655828	0.270949	-2.42049	0.0154996	0.10996
ENSMUSG00000029022	28010	Miip	288.239	0.383421	0.158431	-2.42011	0.0155158	0.110025
ENSMUSG00000018900	20520	Slc22a5	606.403	-0.436549	0.180491	2.41867	0.0155772	0.110282
ENSMUSG00000043872	68310	Zmym1	281.796	0.47306	0.195579	-2.41876	0.0155733	0.110282
ENSMUSG00000027074	58207	Slc43a3	2549.94	-0.534366	0.22094	2.4186	0.0155802	0.110282
ENSMUSG00000053754	67772	Chd8	2385.36	0.273194	0.112941	-2.41892	0.0155667	0.110282
ENSMUSG00000044147	11845	Arf6	1299.13	-0.394022	0.162935	2.41828	0.0155943	0.110332
ENSMUSG00000033987	69926	Dnahc17	68.8529	0.616001	0.254747	-2.41809	0.0156023	0.11034
ENSMUSG00000032011	21838	Thy1	363.506	-0.432506	0.178932	2.41716	0.0156423	0.110523
ENSMUSG00000024404	66878	Riok3	2543.05	-0.282905	0.11708	2.41633	0.0156779	0.110725
ENSMUSG00000036309	21402	Skp1a	3419.7	-0.353581	0.146409	2.41502	0.0157345	0.111025
ENSMUSG00000055435	17132	Maf	582.667	-0.380208	0.157433	2.41505	0.015733	0.111025
ENSMUSG00000026156	280645	B3gat2	58.9964	0.602127	0.249374	-2.41455	0.0157546	0.111116
ENSMUSG00000040043	56516	Rbms2	2790.32	0.296302	0.12278	-2.41328	0.0158097	0.111455
ENSMUSG00000029781	27055	Fkbp9	4510.09	-0.265342	0.110021	2.41174	0.0158766	0.111876
ENSMUSG00000061536	215474	Sec22c	179.2	0.481604	0.199743	-2.41112	0.0159038	0.111953
ENSMUSG00000049323	237782	Smcr8	1499.17	0.416559	0.172809	-2.41051	0.0159301	0.111953
ENSMUSG00000038594	100038725	Gm9766	714.428	0.338261	0.140326	-2.41054	0.0159291	0.111953
ENSMUSG00000036095	217480	Dgkb	29.619	0.627235	0.260173	-2.41084	0.0159158	0.111953
ENSMUSG00000027406	170718	Idh3b	9928.4	-0.272652	0.113095	2.41083	0.0159164	0.111953
ENSMUSG00000041258	329002	Zfp236	1366.13	0.317365	0.13165	-2.41067	0.0159233	0.111953
ENSMUSG00000046598	71911	Bdh1	888.736	0.413772	0.171761	-2.409	0.0159962	0.11217
ENSMUSG00000031327	12212	Chic1	234.336	-0.445485	0.184931	2.40892	0.0159997	0.11217
ENSMUSG00000074269	73673	2410076I21Rik	27.0723	0.646474	0.268377	-2.40883	0.0160039	0.11217
ENSMUSG00000021725	52552	Parp8	706.028	0.337495	0.140096	-2.40903	0.0159949	0.11217
ENSMUSG00000029924	72144	Slc37a3	707.189	0.295368	0.12261	-2.409	0.0159962	0.11217
ENSMUSG00000028226	17389	Mmp16	211.4	-0.416462	0.172906	2.40861	0.0160136	0.112188
ENSMUSG00000070526	27412	Peg12	29.9326	-0.623423	0.258851	2.40843	0.0160213	0.112192
ENSMUSG00000037235	17122	Mxd4	616.595	-0.332497	0.138109	2.4075	0.0160622	0.112219
ENSMUSG00000028567	66073	Txndc12	827.168	-0.362668	0.150606	2.40806	0.0160375	0.112219
ENSMUSG00000022623	58234	Shank3	1650.1	0.48237	0.200373	-2.40737	0.016068	0.112219
ENSMUSG00000028389	22696	Zfp37	205.702	-0.423052	0.175708	2.4077	0.0160533	0.112219
ENSMUSG00000032245	76524	Cln6	304.006	0.384383	0.159667	-2.4074	0.0160664	0.112219
ENSMUSG00000055067	69726	Smyd3	250.459	0.390289	0.162081	-2.40799	0.0160405	0.112219
ENSMUSG00000027978	19142	Prss12	102.099	-0.515595	0.214232	2.40671	0.0160968	0.11237
ENSMUSG00000024084	70536	Qpct	324.355	-0.487225	0.202474	2.40636	0.0161124	0.112429
ENSMUSG00000025787	331046	Tgm4	263.514	-0.357417	0.148558	2.40591	0.0161323	0.112468
ENSMUSG00000027245	67693	2310003F16Rik	925.242	-0.289439	0.120303	2.40592	0.016132	0.112468
ENSMUSG00000030159	56760	Clec1b	29.298	-0.666395	0.27707	2.40515	0.0161659	0.112569
ENSMUSG00000066684	170741	Pilrb1	11.3314	0.664383	0.27624	-2.40509	0.0161683	0.112569
ENSMUSG00000025574	21877	Tk1	77.5138	0.519944	0.216158	-2.40538	0.0161556	0.112569
ENSMUSG00000023923	72238	Tbc1d5	1062.27	0.347804	0.144631	-2.40477	0.0161827	0.112619
ENSMUSG00000016918	240725	Sulf1	4141.53	-0.397063	0.165165	2.40404	0.0162149	0.112794
ENSMUSG00000020368	12330	Canx	13478.5	-0.298893	0.124395	2.40277	0.0162715	0.113108
ENSMUSG00000021690	57748	Jmy	2661.92	0.441956	0.183941	-2.4027	0.0162744	0.113108
ENSMUSG00000049897	279029	Gm711	14.8929	0.677123	0.281871	-2.40224	0.0162949	0.1132
ENSMUSG00000003810	17776	Mast2	5794.17	0.362543	0.15103	-2.40046	0.0163745	0.113692
ENSMUSG00000059060	19363	Rad51l1	31.8252	0.649101	0.270421	-2.40033	0.0163802	0.113692
ENSMUSG00000027642	20014	Rpn2	2730.88	-0.294238	0.122616	2.39968	0.0164095	0.113845
ENSMUSG00000026003	11363	Acadl	8970.24	0.344526	0.143596	-2.39928	0.0164275	0.113919
ENSMUSG00000001348	11433	Acp5	78.9642	-0.585796	0.244262	2.39823	0.0164746	0.114196
ENSMUSG00000045534	16493	Kcna5	247.219	-0.468235	0.195283	2.39773	0.016497	0.114211
ENSMUSG00000035397	118445	Klf16	141.632	0.511064	0.213147	-2.39771	0.0164981	0.114211
ENSMUSG00000028988	67087	Ctnnbip1	577.715	-0.388737	0.16213	2.3977	0.0164986	0.114211
ENSMUSG00000078485	231002	Plekhn1	116.435	0.505273	0.210757	-2.39742	0.0165108	0.114245
ENSMUSG00000032782	216846	Cntrob	161.685	0.415858	0.173527	-2.3965	0.0165523	0.114381
ENSMUSG00000032217	93836	Rnf111	899.215	0.331242	0.138219	-2.39651	0.0165521	0.114381
ENSMUSG00000026238	19231	Ptma	315.046	-0.387126	0.161558	2.3962	0.0165658	0.114392
ENSMUSG00000027559	12350	Car3	202.22	-0.590703	0.246522	2.39615	0.0165684	0.114392
ENSMUSG00000002524	67959	Puf60	1989.51	-0.305011	0.127311	2.3958	0.016584	0.114399
ENSMUSG00000066324	242291	Impad1	2610.3	-0.347829	0.145177	2.3959	0.0165797	0.114399
ENSMUSG00000000278	74617	Scpep1	686.481	-0.292633	0.12217	2.3953	0.0166069	0.114507
ENSMUSG00000055065	67040	Ddx17	7619.45	0.26408	0.110317	-2.39384	0.016673	0.114862
ENSMUSG00000021922	16427	Itih4	107.974	0.626869	0.261915	-2.39341	0.0166926	0.114896
ENSMUSG00000042404	229541	Dennd4b	1302.48	0.347675	0.145259	-2.39348	0.0166892	0.114896
ENSMUSG00000031312	26549	Itgb1bp2	4251.7	-0.48172	0.201341	2.39256	0.0167313	0.115112
ENSMUSG00000020827	50932	Mink1	1361.94	0.355359	0.148565	-2.39194	0.0167594	0.115255
ENSMUSG00000090290	212728	Gm17296	450.743	0.31816	0.133042	-2.39143	0.0167828	0.115264
ENSMUSG00000009545	16535	Kcnq1	1363.34	0.311819	0.130374	-2.39173	0.0167693	0.115264
ENSMUSG00000024972	56072	Lgals12	22.0235	-0.667649	0.279174	2.39152	0.0167789	0.115264
ENSMUSG00000046546	224093	Fam43a	494.894	0.553317	0.2314	-2.39117	0.0167948	0.115296
ENSMUSG00000021226	171210	Acot2	773.991	-0.546993	0.228779	2.39092	0.016806	0.115323
ENSMUSG00000038213	213233	Tapbpl	232.828	0.419662	0.175582	-2.39012	0.0168426	0.115477
ENSMUSG00000020467	216616	Efemp1	971.159	-0.478794	0.200323	2.39012	0.0168431	0.115477
ENSMUSG00000044949	327900	Ubtd2	449.98	-0.34086	0.142649	2.38951	0.0168709	0.115566
ENSMUSG00000015133	233328	Lrrk1	848.685	0.366655	0.153439	-2.38957	0.016868	0.115566
ENSMUSG00000045103	13405	Dmd	21123.2	0.41873	0.175257	-2.38924	0.0168833	0.115601
[truncated: 38,926 more rows]
