# Supplementary material for: An atrial fibrillation-associated regulatory region modulates cardiac Tbx5 levels and arrhythmia susceptibility
Source: eLife. 2023 Jan 30;12:e80317. doi: 10.7554/eLife.80317 (PMC9928424; doi:10.7554/eLife.80317)
Supplement: Supplementary file 7. [file elife-80317-supp7.xlsx]

## Sheet: Sheet1
Supplemental file 7. DESeq2 result WT v Prrx1(enh)KO adult left atria
Ensembl Gene ID	EntrezGene ID	Associated Gene Name	Base mean	log2(FC) (+ is higher in Prrx1(enh)-/-)	StdErr	Wald-Stats	P-value	P-adj
ENSMUSG00000028967	74155	Errfi1	3150.9	2.15816	0.110874	-19.465	2.17574e-84	3.19725e-80
ENSMUSG00000066687	235320	Zbtb16	3648.08	-1.71152	0.0985007	17.3757	1.26122e-67	9.26678e-64
ENSMUSG00000021025	18035	Nfkbia	1824.17	1.01267	0.0675073	-15.001	7.23647e-51	3.54466e-47
ENSMUSG00000056501	12608	Cebpb	978.083	1.1837	0.0910724	-12.9974	1.26642e-38	3.722e-35
ENSMUSG00000030790	11535	Adm	446.621	1.12071	0.0895861	-12.5098	6.59804e-36	1.61597e-32
ENSMUSG00000031431	14605	Tsc22d3	4896.57	0.860873	0.0726015	-11.8575	1.96744e-32	4.13022e-29
ENSMUSG00000041773	13803	Enc1	1136.88	0.940396	0.0883902	-10.6391	1.95915e-26	3.59871e-23
ENSMUSG00000048546	57259	Tob2	3949.05	0.986418	0.0928994	-10.6181	2.45412e-26	4.00704e-23
ENSMUSG00000020108	74747	Ddit4	1166.26	1.50395	0.142942	-10.5214	6.88573e-26	1.01186e-22
ENSMUSG00000019970	20393	Sgk1	1465	0.936352	0.0984056	-9.51523	1.81316e-21	2.42222e-18
ENSMUSG00000051495	270110	Irf2bp2	3324.21	0.787745	0.0853465	-9.22996	2.70735e-20	3.31538e-17
ENSMUSG00000027962	22329	Vcam1	2688.4	0.633211	0.0699669	-9.05015	1.42769e-19	1.61384e-16
ENSMUSG00000029167	19017	Ppargc1a	3542.55	-0.607845	0.0711062	8.54841	1.24797e-17	1.30992e-14
ENSMUSG00000006362	12398	Cbfa2t3	2106.94	-0.603277	0.0708072	8.52	1.59552e-17	1.56307e-14
ENSMUSG00000024427	24066	Spry4	647.43	0.712722	0.0854629	-8.33955	7.45764e-17	6.84938e-14
ENSMUSG00000022150	13132	Dab2	2863.17	0.536018	0.0658285	-8.14265	3.86711e-16	3.34277e-13
ENSMUSG00000026435	212980	Slc45a3	427.341	0.928522	0.114288	-8.12442	4.49489e-16	3.66958e-13
ENSMUSG00000020205	21664	Phlda1	1065.23	0.582015	0.0719295	-8.09146	5.8952e-16	4.55947e-13
ENSMUSG00000011256	11492	Adam19	3765.11	-0.612328	0.0762496	8.03057	9.70208e-16	7.1286e-13
ENSMUSG00000025993	53945	Slc40a1	921.583	0.655539	0.0818812	-8.00597	1.18526e-15	8.29402e-13
ENSMUSG00000022371	12818	Col14a1	6442.32	0.600612	0.07528	-7.97838	1.48272e-15	9.90389e-13
ENSMUSG00000079105	109828	C7	739.819	0.860025	0.108542	-7.9234	2.31096e-15	1.4765e-12
ENSMUSG00000054364	11852	Rhob	6506.58	0.662256	0.0840852	-7.87601	3.37995e-15	2.06951e-12
ENSMUSG00000038007	230379	Acer2	1767.43	0.527859	0.0673613	-7.83624	4.64248e-15	2.72885e-12
ENSMUSG00000046470	20672	Sox18	1006.02	-0.829221	0.106983	7.75099	9.11786e-15	5.15334e-12
ENSMUSG00000029135	14284	Fosl2	2512.71	0.741645	0.097082	-7.63937	2.18292e-14	1.18807e-11
ENSMUSG00000022893	11504	Adamts1	3204.74	0.807868	0.105864	-7.63121	2.32563e-14	1.22054e-11
ENSMUSG00000055435	17132	Maf	647.02	0.586604	0.0769251	-7.62565	2.42809e-14	1.23037e-11
ENSMUSG00000039031	73910	Arhgap18	995.938	0.533281	0.0709575	-7.5155	5.66932e-14	2.77702e-11
ENSMUSG00000037211	24063	Spry1	831.149	0.555092	0.0743137	-7.46958	8.04537e-14	3.81376e-11
ENSMUSG00000027204	14118	Fbn1	4409.07	0.633934	0.0857866	-7.38966	1.47203e-13	6.75983e-11
ENSMUSG00000061175	329679	Fnip2	474.413	-0.628895	0.085601	7.34681	2.02986e-13	9.03903e-11
ENSMUSG00000028369	64817	Svep1	1716.69	0.794077	0.108291	-7.33281	2.25375e-13	9.74083e-11
ENSMUSG00000022270	66270	Fam134b	3975.98	-0.70711	0.0971431	7.27906	3.36156e-13	1.41138e-10
ENSMUSG00000022053	13592	Ebf2	338.467	0.727619	0.100232	-7.25937	3.889e-13	1.58747e-10
ENSMUSG00000041695	16518	Kcnj2	1385.99	-0.671417	0.0926062	7.25023	4.16053e-13	1.6524e-10
ENSMUSG00000024222	14229	Fkbp5	1122.4	-0.851264	0.11759	7.23927	4.51115e-13	1.74451e-10
ENSMUSG00000040433	245007	Zbtb38	1400.58	-0.527977	0.0745996	7.07748	1.46797e-12	5.53125e-10
ENSMUSG00000045201	218763	Lrrc3b	2020.6	0.408	0.0577425	-7.06585	1.59633e-12	5.86451e-10
ENSMUSG00000036867	17130	Smad6	973.469	-0.613962	0.087534	7.01398	2.31638e-12	8.10456e-10
ENSMUSG00000039109	74145	F13a1	2004.49	0.80832	0.115391	-7.00505	2.46892e-12	8.4374e-10
ENSMUSG00000020889	217166	Nr1d1	8001.56	-0.527567	0.0754808	6.98942	2.76016e-12	9.2183e-10
ENSMUSG00000027954	13636	Efna1	1083.69	-0.676533	0.0981803	6.89072	5.55088e-12	1.77327e-09
ENSMUSG00000026094	98267	Stk17b	418.58	0.677084	0.0987279	-6.85808	6.97912e-12	2.18209e-09
ENSMUSG00000026640	18845	Plxna2	2163.55	-0.528481	0.0772876	6.83785	8.03878e-12	2.46104e-09
ENSMUSG00000040423	381305	Rc3h1	2245.74	-0.472423	0.0691777	6.82911	8.54402e-12	2.51109e-09
ENSMUSG00000079419	73656	Ms4a6c	151.11	0.836628	0.12249	-6.83018	8.48091e-12	2.51109e-09
ENSMUSG00000022665	67896	Ccdc80	11193.7	0.639498	0.0943655	-6.77682	1.22847e-11	3.53969e-09
ENSMUSG00000025006	20411	Sorbs1	16807.6	-0.513958	0.0763689	6.72994	1.69733e-11	4.79658e-09
ENSMUSG00000026712	17533	Mrc1	2040.96	0.652672	0.0970773	-6.72322	1.77753e-11	4.92844e-09
ENSMUSG00000007476	241296	Lrrc8a	2773.56	0.354424	0.0529079	-6.69889	2.1001e-11	5.715e-09
ENSMUSG00000043719	245026	Col6a6	1084.6	0.621436	0.0929864	-6.68309	2.33958e-11	6.25093e-09
ENSMUSG00000014773	13388	Dll1	413.811	-0.603563	0.0904767	6.67092	2.54203e-11	6.55354e-09
ENSMUSG00000051906	69142	Cd209f	292.598	0.827242	0.123962	-6.67334	2.50042e-11	6.55354e-09
ENSMUSG00000000078	23849	Klf6	3620.41	0.568415	0.0855017	-6.64799	2.97121e-11	7.52791e-09
ENSMUSG00000069516	17105	Lyz2	2621.21	0.634997	0.0956895	-6.63601	3.22282e-11	8.027e-09
ENSMUSG00000036040	77794	Adamtsl2	1521.07	0.554506	0.0844483	-6.56622	5.16102e-11	1.22563e-08
ENSMUSG00000002900	16777	Lamb1	5616.28	0.348056	0.0530095	-6.56593	5.17107e-11	1.22563e-08
ENSMUSG00000043079	104027	Synpo	4869.81	-0.412432	0.06327	6.5186	7.09675e-11	1.65534e-08
ENSMUSG00000047205	75219	Dusp18	1193.31	-0.677432	0.10407	6.50942	7.54433e-11	1.73225e-08
ENSMUSG00000008845	93671	Cd163	756.87	0.708963	0.11032	-6.4264	1.30659e-10	2.95389e-08
ENSMUSG00000031530	319520	Dusp4	301.757	-0.763212	0.12008	6.35588	2.07234e-10	4.61409e-08
ENSMUSG00000043259	71721	Fam13c	332.329	0.564051	0.0891314	-6.32831	2.47863e-10	5.43634e-08
ENSMUSG00000000957	17387	Mmp14	1736.33	0.565134	0.0893734	-6.32329	2.56054e-10	5.53341e-08
ENSMUSG00000024011	74116	Pi16	5016.79	0.606432	0.0960754	-6.31204	2.7538e-10	5.8648e-08
ENSMUSG00000057378	20192	Ryr3	359.533	-0.81293	0.128923	6.30554	2.87186e-10	6.02886e-08
ENSMUSG00000044813	230126	Shb	1072.26	-0.44865	0.0711833	6.30274	2.92433e-10	6.05253e-08
ENSMUSG00000028128	14066	F3	872.183	-0.400358	0.0636033	6.29461	3.0817e-10	6.28966e-08
ENSMUSG00000025810	18186	Nrp1	7910.65	0.351906	0.0559916	-6.28499	3.27876e-10	6.60019e-08
ENSMUSG00000020027	216233	Socs2	937.981	0.655366	0.104608	-6.26494	3.72963e-10	7.40633e-08
ENSMUSG00000031740	17390	Mmp2	8592.52	0.590014	0.0949753	-6.21229	5.2219e-10	1.02314e-07
ENSMUSG00000029675	13717	Eln	5610.62	0.42226	0.0680392	-6.20613	5.43036e-10	1.04999e-07
ENSMUSG00000026837	12831	Col5a1	4655.08	0.565525	0.0915974	-6.17402	6.65731e-10	1.27051e-07
ENSMUSG00000020053	16000	Igf1	1440.13	0.672959	0.109129	-6.16664	6.9757e-10	1.3142e-07
ENSMUSG00000019944	69288	Rhobtb1	9167.7	-0.52532	0.0852645	6.16106	7.22598e-10	1.34412e-07
ENSMUSG00000002504	65962	Slc9a3r2	3181.62	-0.501455	0.0814769	6.15456	7.52844e-10	1.38288e-07
ENSMUSG00000031239	16431	Itm2a	677.296	0.542026	0.0881332	-6.15007	7.74465e-10	1.40503e-07
ENSMUSG00000029178	16599	Klf3	1282.13	-0.408075	0.0664508	6.14101	8.19986e-10	1.46947e-07
ENSMUSG00000045064	72350	Fam164c	154.387	-0.692304	0.112833	6.13563	8.48224e-10	1.50177e-07
ENSMUSG00000032265	212943	Fam46a	1935.47	0.686021	0.112163	-6.11631	9.57676e-10	1.67536e-07
ENSMUSG00000068079	21407	Tcf15	311.448	-0.582015	0.0952295	6.11171	9.85695e-10	1.70409e-07
ENSMUSG00000026042	12832	Col5a2	2266.96	0.640212	0.104927	-6.10152	1.05064e-09	1.79526e-07
ENSMUSG00000036334	242050	Igsf10	618.152	0.552859	0.0910519	-6.07191	1.26395e-09	2.13492e-07
ENSMUSG00000043639	73713	Rbm20	13810.6	-0.356034	0.0591376	6.02044	1.73945e-09	2.90468e-07
ENSMUSG00000015354	76477	Pcolce2	1793.79	0.386244	0.0647334	-5.96669	2.42115e-09	3.99762e-07
ENSMUSG00000045534	16493	Kcna5	500.786	0.660243	0.110839	-5.95675	2.57304e-09	4.2012e-07
ENSMUSG00000023336	67866	Wfdc1	380.891	0.562243	0.09478	-5.93208	2.99114e-09	4.8302e-07
ENSMUSG00000027322	20612	Siglec1	215.661	0.813059	0.137824	-5.89927	3.65123e-09	5.83204e-07
ENSMUSG00000040943	214133	Tet2	976.313	-0.3786	0.064257	5.89196	3.81652e-09	6.03051e-07
ENSMUSG00000039883	74511	Lrrc17	570.403	0.672892	0.114417	-5.88106	4.07638e-09	6.23983e-07
ENSMUSG00000063060	20680	Sox7	1222.55	-0.548738	0.0932546	5.8843	3.99735e-09	6.23983e-07
ENSMUSG00000005534	16337	Insr	5894.45	-0.382096	0.0649653	5.88154	4.06463e-09	6.23983e-07
ENSMUSG00000028111	13038	Ctsk	454.662	0.541458	0.0922051	-5.87231	4.29755e-09	6.51056e-07
ENSMUSG00000022894	23794	Adamts5	1586.71	0.501461	0.0855616	-5.86081	4.60605e-09	6.90673e-07
ENSMUSG00000055065	67040	Ddx17	10084	-0.285118	0.0487679	5.84642	5.02255e-09	7.45519e-07
ENSMUSG00000015852	80891	Fcrls	343.654	0.712763	0.122083	-5.83836	5.27161e-09	7.74662e-07
ENSMUSG00000034118	22021	Tpst1	886.946	0.452642	0.0775685	-5.83538	5.36677e-09	7.80838e-07
ENSMUSG00000038463	320078	Olfml2b	2554.85	0.450728	0.0774095	-5.82264	5.79245e-09	8.34511e-07
ENSMUSG00000074793	72630	Hspa12b	1161.77	-0.460479	0.0793712	5.80158	6.56926e-09	9.37236e-07
ENSMUSG00000030353	21679	Tead4	190.682	-0.617582	0.10662	5.79237	6.93998e-09	9.80606e-07
ENSMUSG00000067780	94227	Pi15	427.189	0.739078	0.127679	-5.78855	7.09975e-09	9.93627e-07
ENSMUSG00000021886	14744	Gpr65	28.4849	0.843353	0.146057	-5.77415	7.73437e-09	1.07223e-06
ENSMUSG00000036446	17022	Lum	7025.21	0.518751	0.0898868	-5.77116	7.87267e-09	1.0812e-06
ENSMUSG00000028978	18127	Nos3	2450.13	-0.431497	0.0748662	5.76358	8.23482e-09	1.12047e-06
ENSMUSG00000030134	70727	Rasgef1a	73.8065	-0.795028	0.138059	5.75861	8.48075e-09	1.14335e-06
ENSMUSG00000031380	14205	Figf	273.788	0.563665	0.0981709	-5.74167	9.37467e-09	1.24109e-06
ENSMUSG00000027996	20319	Sfrp2	124.94	0.725813	0.126528	-5.7364	9.67089e-09	1.26887e-06
ENSMUSG00000032495	74249	Lrrc2	3017.68	-0.499842	0.087163	5.73457	9.7758e-09	1.27129e-06
ENSMUSG00000048070	193003	Pirt	542.814	0.539944	0.09457	-5.70947	1.13332e-08	1.46088e-06
ENSMUSG00000042793	329252	Lgr6	1411.81	-0.580728	0.101909	5.69851	1.20862e-08	1.54441e-06
ENSMUSG00000021998	18826	Lcp1	801.727	0.611518	0.108067	-5.65869	1.52534e-08	1.9158e-06
ENSMUSG00000001119	12833	Col6a1	5499.62	0.504513	0.0892723	-5.65139	1.59153e-08	1.98199e-06
ENSMUSG00000034936	80981	Arl4d	2256.4	0.51644	0.0914574	-5.64678	1.63481e-08	2.01878e-06
ENSMUSG00000032122	56857	Slc37a2	195.858	0.610597	0.108359	-5.63493	1.75129e-08	2.14265e-06
ENSMUSG00000024206	19725	Rfx2	547.921	-0.665617	0.118302	5.62642	1.83987e-08	2.21614e-06
ENSMUSG00000015501	15273	Hivep2	2011.05	-0.411721	0.0743084	5.5407	3.01268e-08	3.57356e-06
ENSMUSG00000035992	216742	Fnip1	1690.35	-0.398136	0.0718588	5.54054	3.01546e-08	3.57356e-06
ENSMUSG00000037996	76376	Slc24a2	448.242	-0.533644	0.096406	5.53538	3.10559e-08	3.65093e-06
ENSMUSG00000026409	18640	Pfkfb2	2612.68	-0.497718	0.0901506	5.52096	3.37143e-08	3.932e-06
ENSMUSG00000022469	223864	Rapgef3	1053.95	-0.415792	0.0755766	5.5016	3.76365e-08	4.32777e-06
ENSMUSG00000045680	21412	Tcf21	947.419	0.484127	0.0880021	-5.50132	3.76968e-08	4.32777e-06
ENSMUSG00000018774	12514	Cd68	402.406	0.717584	0.130722	-5.4894	4.03294e-08	4.59411e-06
ENSMUSG00000039220	52040	Ppp1r10	1006.36	0.477774	0.0873522	-5.46952	4.51269e-08	5.10107e-06
ENSMUSG00000052921	442801	Arhgef15	1678.95	-0.325287	0.059502	5.46682	4.58171e-08	5.13956e-06
ENSMUSG00000044786	22695	Zfp36	3623.36	0.810131	0.149117	-5.43284	5.54641e-08	6.12816e-06
ENSMUSG00000036596	242939	Cpz	162.988	0.741176	0.137132	-5.40483	6.48712e-08	7.11405e-06
ENSMUSG00000039062	16790	Anpep	1800.59	0.36056	0.0668798	-5.39116	7.00041e-08	7.62008e-06
ENSMUSG00000035828	223775	Pim3	2623.08	0.39834	0.0739158	-5.3891	7.081e-08	7.65113e-06
ENSMUSG00000065987	69165	Cd209b	135.09	0.755894	0.140694	-5.3726	7.76109e-08	8.32477e-06
ENSMUSG00000032845	225638	Alpk2	9411.15	-0.364733	0.0681557	5.35147	8.72424e-08	9.22321e-06
ENSMUSG00000038894	384783	Irs2	745.98	0.79726	0.149125	-5.34626	8.97887e-08	9.42461e-06
ENSMUSG00000048489	213393	8430408G22Rik	812.564	0.77399	0.144836	-5.34392	9.09586e-08	9.47969e-06
ENSMUSG00000023951	22339	Vegfa	7066.56	-0.300198	0.0562882	5.33323	9.6482e-08	9.98453e-06
ENSMUSG00000060843	216033	Ctnna3	1329.61	-0.406936	0.0764967	5.31966	1.03962e-07	1.06834e-05
ENSMUSG00000042099	80880	Kank3	1407.9	-0.391609	0.0740981	5.285	1.25705e-07	1.26955e-05
ENSMUSG00000017446	56745	C1qtnf1	994.045	0.476809	0.09023	-5.28437	1.26135e-07	1.26955e-05
ENSMUSG00000023349	56620	Clec4n	52.0448	0.769554	0.145846	-5.27647	1.31693e-07	1.31648e-05
ENSMUSG00000037138	16764	Aff3	645.054	0.407762	0.0774041	-5.26796	1.37946e-07	1.34843e-05
ENSMUSG00000041797	217262	Abca9	1098.27	0.426447	0.0809289	-5.2694	1.36868e-07	1.34843e-05
ENSMUSG00000051439	12475	Cd14	253.115	0.589216	0.111866	-5.26715	1.38559e-07	1.34843e-05
ENSMUSG00000040289	15213	Hey1	528	-0.509544	0.096697	5.26949	1.36801e-07	1.34843e-05
ENSMUSG00000046743	329628	Fat4	727.622	0.482154	0.0917909	-5.25274	1.49853e-07	1.44874e-05
ENSMUSG00000022508	12053	Bcl6	947.906	-0.614736	0.117303	5.2406	1.60055e-07	1.53726e-05
ENSMUSG00000022488	105855	Nckap1l	323.443	0.581706	0.11105	-5.23822	1.62133e-07	1.5471e-05
ENSMUSG00000034898	70598	Filip1	2991.45	-0.536231	0.102665	5.22312	1.75936e-07	1.66799e-05
ENSMUSG00000004730	13733	Emr1	246.012	0.699563	0.133974	-5.22162	1.77367e-07	1.67078e-05
ENSMUSG00000046318	320924	Ccbe1	338.281	0.591247	0.113529	-5.20789	1.91e-07	1.78773e-05
ENSMUSG00000005397	18073	Nid1	8158.37	0.372362	0.0716809	-5.19471	2.05037e-07	1.90698e-05
ENSMUSG00000030737	101488	Slco2b1	722.49	0.494251	0.0955029	-5.17525	2.27604e-07	2.10355e-05
ENSMUSG00000020893	18626	Per1	2999.74	0.766122	0.149152	-5.13651	2.79882e-07	2.57054e-05
ENSMUSG00000031618	110784	Nr3c2	961.494	-0.425964	0.0830514	5.12892	2.91407e-07	2.65977e-05
ENSMUSG00000028339	12819	Col15a1	17575.8	0.542603	0.105849	-5.12619	2.95657e-07	2.6819e-05
ENSMUSG00000021838	74480	Samd4	3648.53	-0.376543	0.0734967	5.12326	3.00298e-07	2.70729e-05
ENSMUSG00000047497	239337	Adamts12	164.577	0.588481	0.114988	-5.11776	3.09182e-07	2.77038e-05
ENSMUSG00000018411	17762	Mapt	1401.81	-0.435262	0.085199	5.10877	3.24265e-07	2.88793e-05
ENSMUSG00000022602	11838	Arc	192.913	0.711676	0.139688	-5.09474	3.4922e-07	3.09144e-05
ENSMUSG00000020961	108800	Ston2	413.08	0.45957	0.090232	-5.09321	3.5206e-07	3.09791e-05
ENSMUSG00000090084	51795	Srpx	316.54	0.603298	0.118616	-5.08615	3.65401e-07	3.19617e-05
ENSMUSG00000031626	234214	Sorbs2	10745.6	-0.423982	0.0835182	5.07653	3.84395e-07	3.34242e-05
ENSMUSG00000035545	232798	Leng8	5327.16	-0.355843	0.0701814	5.07033	3.97119e-07	3.43274e-05
ENSMUSG00000039361	233489	Picalm	3406.05	-0.535613	0.105667	5.06889	4.00151e-07	3.43873e-05
ENSMUSG00000039145	227541	Camk1d	3772.4	-0.381625	0.0753392	5.06543	4.07488e-07	3.46129e-05
ENSMUSG00000022180	50934	Slc7a8	327.357	0.59334	0.117125	-5.06585	4.06583e-07	3.46129e-05
ENSMUSG00000054252	14184	Fgfr3	399.437	-0.583553	0.115293	5.0615	4.15968e-07	3.51302e-05
ENSMUSG00000026399	13136	Cd55	705.025	0.513165	0.101467	-5.05745	4.24908e-07	3.55831e-05
ENSMUSG00000049550	56430	Clip1	5120.81	-0.423696	0.083811	5.05538	4.29544e-07	3.55831e-05
ENSMUSG00000019989	209558	Enpp3	508.675	0.422948	0.0836739	-5.05472	4.31017e-07	3.55831e-05
ENSMUSG00000034687	231470	Fras1	1876.38	-0.349057	0.0690263	5.05687	4.262e-07	3.55831e-05
ENSMUSG00000000275	217069	Trim25	1351.12	-0.36665	0.0725957	5.05057	4.405e-07	3.61629e-05
ENSMUSG00000026043	12825	Col3a1	35064.1	0.712801	0.141194	-5.04838	4.45569e-07	3.63758e-05
ENSMUSG00000022032	71145	Scara5	2147.61	0.433677	0.0862055	-5.03073	4.8861e-07	3.96692e-05
ENSMUSG00000026389	68428	Steap3	3791.27	0.391167	0.0779901	-5.0156	5.28676e-07	4.26862e-05
ENSMUSG00000027408	56264	Cpxm1	881.127	0.56471	0.112684	-5.01143	5.40259e-07	4.33831e-05
ENSMUSG00000032725	14276	Folr2	500.052	0.543167	0.108562	-5.00329	5.63598e-07	4.50113e-05
ENSMUSG00000022528	15205	Hes1	613.371	-0.487694	0.0979968	4.97664	6.46986e-07	5.11153e-05
ENSMUSG00000071547	70021	Nt5dc2	1167.59	0.315813	0.0634763	-4.97529	6.51502e-07	5.11969e-05
ENSMUSG00000060187	237560	Lrrc10	4779.34	0.441878	0.0888994	-4.97054	6.67677e-07	5.19127e-05
ENSMUSG00000024781	16889	Lipa	1540.3	0.333281	0.0671462	-4.96352	6.92286e-07	5.35429e-05
ENSMUSG00000038708	54214	Golga4	12916.5	-0.279566	0.05634	4.96213	6.9726e-07	5.36452e-05
ENSMUSG00000058818	18733	Lilrb3	222.549	0.550433	0.111115	-4.95372	7.28089e-07	5.57254e-05
ENSMUSG00000074170	72287	Plekhf1	576.424	0.487939	0.0990512	-4.92613	8.3874e-07	6.38616e-05
ENSMUSG00000061535	109323	C1qtnf7	496.27	0.433663	0.0881396	-4.92019	8.6461e-07	6.51561e-05
ENSMUSG00000035258	320712	Abi3bp	2170.44	0.42822	0.0870169	-4.92111	8.60558e-07	6.51561e-05
ENSMUSG00000020251	74782	Glt8d2	174.475	0.559323	0.113809	-4.91458	8.89738e-07	6.67076e-05
ENSMUSG00000034641	217305	Cd300ld	186.852	0.615717	0.125523	-4.90519	9.33355e-07	6.89229e-05
ENSMUSG00000028944	108099	Prkag2	3260.39	-0.336342	0.0685591	4.90586	9.30177e-07	6.89229e-05
ENSMUSG00000038244	320878	Mical2	6113.65	-0.368855	0.0751958	4.90526	9.33059e-07	6.89229e-05
ENSMUSG00000025877	212032	Hk3	109.608	0.623472	0.127443	-4.89217	9.97298e-07	7.32765e-05
ENSMUSG00000036545	216725	Adamts2	1678.72	0.549901	0.112531	-4.88667	1.02553e-06	7.49762e-05
ENSMUSG00000020538	20787	Srebf1	1134.53	-0.349853	0.0716539	4.88254	1.0473e-06	7.61883e-05
ENSMUSG00000039787	99151	Cercam	303.502	0.542818	0.111384	-4.87338	1.09704e-06	7.90946e-05
ENSMUSG00000069792	100034251	Gm11428	216.164	0.688805	0.141345	-4.87321	1.09801e-06	7.90946e-05
ENSMUSG00000036896	12262	C1qc	1365.7	0.553591	0.113748	-4.86681	1.13412e-06	8.12968e-05
ENSMUSG00000033420	69538	Antxr1	1729.58	0.392975	0.080807	-4.86313	1.15547e-06	8.24252e-05
ENSMUSG00000023959	224796	Clic5	7602.67	-0.332962	0.0685408	4.85787	1.18654e-06	8.42331e-05
ENSMUSG00000028444	12804	Cntfr	1987.35	0.459741	0.0946631	-4.8566	1.19416e-06	8.43666e-05
ENSMUSG00000020644	15902	Id2	847.682	-0.463295	0.0957762	4.83726	1.31638e-06	9.21156e-05
ENSMUSG00000023809	20112	Rps6ka2	1212.06	0.330863	0.068486	-4.8311	1.35781e-06	9.45643e-05
ENSMUSG00000050315	118449	Synpo2	3981.45	-0.321927	0.0668905	4.81275	1.48865e-06	0.000103187
ENSMUSG00000028348	68016	Murc	1630.85	-0.521652	0.108473	4.80904	1.51657e-06	0.00010431
ENSMUSG00000042082	11881	Arsb	943.299	0.458439	0.095335	-4.80871	1.51904e-06	0.00010431
ENSMUSG00000028410	15502	Dnaja1	762.25	0.341237	0.0709891	-4.80689	1.53298e-06	0.00010447
ENSMUSG00000028664	13844	Ephb2	76.5362	0.647667	0.134747	-4.80655	1.53559e-06	0.00010447
ENSMUSG00000005483	81489	Dnajb1	1876.48	0.68148	0.141908	-4.80225	1.56891e-06	0.000106245
ENSMUSG00000038233	245050	Fam198a	147.119	0.591576	0.123336	-4.79645	1.61503e-06	0.00010744
ENSMUSG00000041112	140580	Elmo1	650.737	0.333901	0.0696013	-4.79734	1.60789e-06	0.00010744
ENSMUSG00000057133	71389	Chd6	3289.65	0.453881	0.0946304	-4.79635	1.61581e-06	0.00010744
ENSMUSG00000037685	11980	Atp8a1	1871.18	-0.366801	0.0764695	4.79669	1.61309e-06	0.00010744
ENSMUSG00000053702	74103	Nebl	2829.11	-0.35898	0.0749078	4.79229	1.64885e-06	0.000109144
ENSMUSG00000000318	17312	Clec10a	388.473	0.597977	0.125602	-4.76089	1.92737e-06	0.000126742
ENSMUSG00000041828	217258	Abca8a	5095.44	0.287177	0.0603261	-4.76041	1.93196e-06	0.000126742
ENSMUSG00000042249	320129	Adrbk2	2319.14	-0.339185	0.0714226	4.74898	2.04444e-06	0.000133524
ENSMUSG00000045092	13609	S1pr1	3932.36	0.393392	0.0828968	-4.74556	2.0793e-06	0.0001352
ENSMUSG00000019124	69938	Scrn1	554.493	0.443523	0.0935255	-4.74227	2.11339e-06	0.000136812
ENSMUSG00000033721	57257	Vav3	406.775	0.498625	0.105331	-4.73388	2.20268e-06	0.000141967
ENSMUSG00000020067	68802	Mypn	7277.02	-0.420722	0.0889524	4.72974	2.24803e-06	0.000144256
ENSMUSG00000049134	18175	Nrap	20523.6	-0.453918	0.0961289	4.72198	2.33562e-06	0.000148843
ENSMUSG00000092491	18175	Nrap	20523.6	-0.453918	0.0961289	4.72198	2.33562e-06	0.000148843
ENSMUSG00000056313	69068	1810011O10Rik	871.255	0.515015	0.109177	-4.71726	2.39044e-06	0.000151412
ENSMUSG00000014813	20855	Stc1	278.793	0.526342	0.111624	-4.71529	2.41361e-06	0.000152223
ENSMUSG00000046417	192976	BC046404	369.189	0.412478	0.0874988	-4.71409	2.42789e-06	0.000152469
ENSMUSG00000036256	29817	Igfbp7	5806.28	0.46923	0.0995973	-4.71127	2.46172e-06	0.000153284
ENSMUSG00000026574	56429	Dpt	9296.92	0.396725	0.0842049	-4.71142	2.45996e-06	0.000153284
ENSMUSG00000047746	207215	Fbxo40	1927.47	-0.340013	0.0721881	4.7101	2.47599e-06	0.000153522
ENSMUSG00000035606	16716	Ky	207.445	0.55736	0.118369	-4.70868	2.49324e-06	0.000153679
ENSMUSG00000000276	56077	Dgke	463.464	-0.392808	0.083431	4.70817	2.49945e-06	0.000153679
ENSMUSG00000017737	17395	Mmp9	400.771	0.589597	0.12534	-4.70397	2.55145e-06	0.000155686
ENSMUSG00000049588	52570	Ccdc69	376.449	0.413946	0.0880178	-4.70298	2.56386e-06	0.000155686
ENSMUSG00000020241	12834	Col6a2	7953.74	0.464562	0.0988496	-4.69969	2.60556e-06	0.000157567
ENSMUSG00000000753	20317	Serpinf1	1889.98	0.417723	0.0889954	-4.69376	2.68223e-06	0.000161538
ENSMUSG00000061132	17060	Blnk	95.3602	0.620554	0.132698	-4.67643	2.91912e-06	0.000175088
ENSMUSG00000054580	18779	Pla2r1	588.841	-0.436027	0.0935141	4.66269	3.12101e-06	0.000186436
ENSMUSG00000024534	67847	Sncaip	725.357	0.409823	0.0879194	-4.66134	3.14152e-06	0.000186901
ENSMUSG00000024300	17916	Myo1f	176.853	0.560574	0.120558	-4.64984	3.3219e-06	0.000196045
ENSMUSG00000020427	16009	Igfbp3	2526.95	0.478112	0.103422	-4.6229	3.78418e-06	0.000222434
ENSMUSG00000040690	107581	Col16a1	1023.61	0.407906	0.0882755	-4.62083	3.82199e-06	0.000223762
ENSMUSG00000023067	12575	Cdkn1a	1129.55	0.499548	0.108147	-4.61914	3.85334e-06	0.000223814
ENSMUSG00000073490	226691	AI607873	245.888	0.506771	0.109709	-4.61923	3.85166e-06	0.000223814
ENSMUSG00000057254	240066	Zfp870	328.989	-0.411452	0.0891164	4.61701	3.89309e-06	0.000225232
ENSMUSG00000022010	21807	Tsc22d1	14736.9	0.209147	0.0453085	-4.61606	3.91097e-06	0.000225379
ENSMUSG00000049791	14366	Fzd4	1335.17	0.362185	0.0787284	-4.60043	4.21612e-06	0.000242015
ENSMUSG00000020836	216961	Coro6	4698.03	-0.358899	0.0780535	4.59811	4.26335e-06	0.000243774
ENSMUSG00000001227	20359	Sema6b	353.096	0.407862	0.0887874	-4.5937	4.35456e-06	0.000248024
ENSMUSG00000043832	73149	Clec4a3	67.9182	0.644721	0.140565	-4.58663	4.50449e-06	0.000254591
ENSMUSG00000067586	13610	S1pr3	1451.12	0.333165	0.0726282	-4.58727	4.49074e-06	0.000254591
ENSMUSG00000004939	69564	Itgb1bp3	1052.09	-0.483556	0.10547	4.58479	4.54444e-06	0.000255864
ENSMUSG00000022901	12524	Cd86	68.2913	0.638904	0.139481	-4.58059	4.63664e-06	0.000260059
ENSMUSG00000034271	81703	Jdp2	316.503	0.506383	0.110606	-4.57826	4.68868e-06	0.000261978
ENSMUSG00000005373	58805	Mlxipl	1423.24	-0.351871	0.0769011	4.57563	4.74794e-06	0.000264284
ENSMUSG00000022440	72709	C1qtnf6	264.273	0.606067	0.132923	-4.55954	5.12646e-06	0.000282148
ENSMUSG00000045917	230279	6330416G13Rik	299.01	0.40132	0.0880034	-4.56027	5.10869e-06	0.000282148
ENSMUSG00000059498	14131	Fcgr3	351.412	0.562615	0.123513	-4.55509	5.23627e-06	0.000287116
ENSMUSG00000046805	17476	Mpeg1	833.717	0.427313	0.093861	-4.55262	5.29832e-06	0.000289438
ENSMUSG00000015243	11303	Abca1	1682.62	0.30411	0.0669111	-4.54499	5.49377e-06	0.000299004
ENSMUSG00000005667	17768	Mthfd2	200.54	0.596675	0.131432	-4.5398	5.63069e-06	0.000305325
ENSMUSG00000001870	268977	Ltbp1	3846.97	0.309523	0.0682168	-4.53735	5.69665e-06	0.000307765
ENSMUSG00000002083	170770	Bbc3	101.401	-0.611772	0.135303	4.5215	6.14021e-06	0.000330514
ENSMUSG00000022816	14314	Fstl1	7184.15	0.419107	0.0929147	-4.51066	6.46251e-06	0.000345688
ENSMUSG00000044037	235633	Als2cl	525.324	-0.439798	0.0975066	4.51045	6.46916e-06	0.000345688
ENSMUSG00000068747	20661	Sort1	16719.4	-0.192889	0.0430122	4.48451	7.30805e-06	0.000389101
ENSMUSG00000015947	14129	Fcgr1	64.1054	0.626111	0.139751	-4.4802	7.4574e-06	0.000395619
ENSMUSG00000010066	56808	Cacna2d2	2084.32	-0.374676	0.0836731	4.47785	7.53978e-06	0.000398551
ENSMUSG00000029710	13846	Ephb4	4225.79	-0.259254	0.0579106	4.4768	7.57719e-06	0.000399092
ENSMUSG00000050914	654824	Ankrd37	54.0916	-0.630894	0.140998	4.47447	7.65997e-06	0.000402012
ENSMUSG00000021313	20191	Ryr2	73837.4	-0.260675	0.0582727	4.47336	7.70001e-06	0.000402675
ENSMUSG00000029838	19242	Ptn	170.448	0.53722	0.120251	-4.46749	7.91416e-06	0.000412406
ENSMUSG00000020262	110532	Adarb1	1716.11	-0.279279	0.0625861	4.46232	8.10783e-06	0.000418446
ENSMUSG00000031273	94216	Col4a6	1308.61	0.455891	0.102149	-4.46301	8.08179e-06	0.000418446
ENSMUSG00000074890	329504	Lcmt2	340.646	-0.40471	0.0906991	4.46211	8.11548e-06	0.000418446
ENSMUSG00000032334	16949	Loxl1	3949.26	0.419962	0.0941478	-4.46067	8.17036e-06	0.000419802
ENSMUSG00000019960	67603	Dusp6	774.727	0.367421	0.0824304	-4.45734	8.29822e-06	0.000424886
ENSMUSG00000041202	18782	Pla2g2d	333.699	0.55353	0.124235	-4.45552	8.36885e-06	0.000427015
ENSMUSG00000026785	263803	Pkn3	559.924	-0.380281	0.0856523	4.43983	9.00318e-06	0.000456213
ENSMUSG00000022754	56277	Tmem45a	228.171	0.481817	0.108514	-4.44014	8.9899e-06	0.000456213
ENSMUSG00000021981	69008	Cab39l	1647.35	0.278069	0.0626896	-4.43565	9.17951e-06	0.00046355
ENSMUSG00000032300	74211	1700017B05Rik	690.872	0.399892	0.090173	-4.43471	9.21945e-06	0.000463972
ENSMUSG00000025150	12409	Cbr2	669.177	0.541114	0.122062	-4.43312	9.28786e-06	0.000465819
ENSMUSG00000079355	252837	Ccrl1	129.415	0.600212	0.135638	-4.42509	9.64001e-06	0.000481837
ENSMUSG00000022098	12153	Bmp1	2555.11	0.260551	0.0589048	-4.42326	9.72237e-06	0.000484306
ENSMUSG00000026819	227731	Slc25a25	535.361	0.530274	0.120183	-4.41221	1.02321e-05	0.000506678
ENSMUSG00000028841	194231	Cnksr1	124.145	-0.580565	0.131608	4.41131	1.02749e-05	0.000506678
ENSMUSG00000038178	215113	Slc43a2	434.675	0.445447	0.100969	-4.41172	1.02555e-05	0.000506678
ENSMUSG00000027508	94212	Pag1	348.199	0.359677	0.0817001	-4.4024	1.07059e-05	0.000526164
ENSMUSG00000005718	83383	Tfap4	121.346	-0.573063	0.130198	4.40147	1.07519e-05	0.000526665
ENSMUSG00000061898	57782	Rbak	301.769	-0.45691	0.103935	4.39613	1.10198e-05	0.000537992
ENSMUSG00000042369	241490	Rbm45	685.228	-0.322192	0.0733304	4.3937	1.11436e-05	0.000542235
ENSMUSG00000016918	240725	Sulf1	4002.82	0.386015	0.0879042	-4.39132	1.12665e-05	0.000546405
ENSMUSG00000025608	27205	Podxl	5829.2	-0.305999	0.069786	4.38483	1.16079e-05	0.00056111
ENSMUSG00000038843	14537	Gcnt1	3611.24	-0.264011	0.0603633	4.3737	1.22158e-05	0.000588563
ENSMUSG00000023153	69671	Tmem52	86.3678	0.623604	0.142803	-4.36688	1.26036e-05	0.000605263
ENSMUSG00000024395	225341	Lims2	3859	-0.254123	0.0582181	4.36502	1.27114e-05	0.000608448
ENSMUSG00000051747	22138	Ttn	197209	-0.346044	0.0796281	4.34576	1.38795e-05	0.000662203
ENSMUSG00000031495	170779	Cd209d	64.3619	0.625318	0.144039	-4.3413	1.41641e-05	0.000673595
ENSMUSG00000029177	12615	Cenpa	1014.13	-0.398891	0.0919442	4.3384	1.43522e-05	0.000680342
ENSMUSG00000046442	320472	Ppm1e	769.153	-0.473785	0.109444	4.329	1.49791e-05	0.000707775
ENSMUSG00000044921	237504	Rassf9	153.483	-0.575225	0.132956	4.32644	1.51539e-05	0.00071374
ENSMUSG00000032134	73732	Muc16	333.459	0.506855	0.117318	-4.32036	1.55774e-05	0.00073134
ENSMUSG00000040479	104418	Dgkz	4035.02	-0.256794	0.0596391	4.30579	1.66388e-05	0.000778685
ENSMUSG00000020865	76408	Abcc3	122.288	0.589229	0.136968	-4.30196	1.69294e-05	0.000789768
ENSMUSG00000079168	70192	Cd209g	108.688	0.596946	0.13883	-4.29985	1.70916e-05	0.000794813
ENSMUSG00000024084	70536	Qpct	315.233	0.457284	0.106423	-4.29684	1.73253e-05	0.00080314
ENSMUSG00000024538	19038	Ppic	908.386	0.367039	0.0854945	-4.29313	1.76169e-05	0.00081409
ENSMUSG00000028989	654812	Angptl7	68.2417	0.62837	0.146441	-4.29094	1.77918e-05	0.000817033
ENSMUSG00000038068	218215	Rnf144b	957.301	-0.38341	0.0893503	4.29108	1.77803e-05	0.000817033
ENSMUSG00000022995	13800	Enah	4428.93	-0.45242	0.105601	4.28422	1.83383e-05	0.000839505
ENSMUSG00000022324	17181	Matn2	2283.91	0.479803	0.112204	-4.27615	1.90152e-05	0.000867792
ENSMUSG00000004837	71520	Grap	341.222	0.410191	0.0960662	-4.26987	1.95583e-05	0.000887067
ENSMUSG00000042515	245631	Mum1l1	211.408	-0.564068	0.13217	4.26775	1.97453e-05	0.000892793
ENSMUSG00000031586	19663	Rbpms	7603.96	-0.225875	0.0529769	4.26365	2.01113e-05	0.00090655
ENSMUSG00000052889	18751	Prkcb	193.526	0.509559	0.119616	-4.25995	2.04474e-05	0.000918884
ENSMUSG00000028214	14579	Gem	888.957	0.446168	0.104764	-4.25878	2.05549e-05	0.000920896
ENSMUSG00000039497	212898	Dse	568.066	0.369473	0.0868375	-4.25477	2.09267e-05	0.000934705
ENSMUSG00000016128	243362	Stard13	2078.65	-0.275049	0.0647849	4.24558	2.18032e-05	0.000970902
ENSMUSG00000026193	14268	Fn1	12454.9	0.378678	0.0892578	-4.24252	2.21024e-05	0.00097837
ENSMUSG00000024042	17691	Sik1	3136.97	0.627855	0.147992	-4.2425	2.2104e-05	0.00097837
ENSMUSG00000045103	13405	Dmd	4970.32	-0.347043	0.0818592	4.23951	2.24005e-05	0.000984519
ENSMUSG00000013584	19378	Aldh1a2	1193.49	0.442865	0.104472	-4.23908	2.24439e-05	0.000984519
ENSMUSG00000054074	72668	2810030E01Rik	145.326	-0.485966	0.114638	4.23912	2.244e-05	0.000984519
ENSMUSG00000035283	11554	Adrb1	867.525	-0.400802	0.0947738	4.22904	2.34694e-05	0.00102644
ENSMUSG00000024180	60455	Tmem8	251.241	0.478859	0.113403	-4.22264	2.41461e-05	0.0010529
ENSMUSG00000045932	15958	Ifit2	257.563	0.423867	0.100701	-4.20917	2.56307e-05	0.00111104
ENSMUSG00000056493	17425	Foxk1	1831.72	-0.303566	0.0721144	4.20951	2.55929e-05	0.00111104
ENSMUSG00000031613	15446	Hpgd	484.131	0.394442	0.0937382	-4.20791	2.57742e-05	0.00111397
ENSMUSG00000052981	76980	Ube2ql1	423.957	-0.328879	0.0782911	4.20072	2.66064e-05	0.00114657
ENSMUSG00000021457	20963	Syk	3084.79	-0.268061	0.0638351	4.19927	2.67776e-05	0.00115058
ENSMUSG00000034164	140703	Emid1	63.6064	0.606234	0.144409	-4.19803	2.69244e-05	0.00115351
ENSMUSG00000014329	83675	Bicc1	1806.51	0.364521	0.0868685	-4.19624	2.71378e-05	0.00115927
ENSMUSG00000031209	15203	Heph	410.997	0.418532	0.099763	-4.19527	2.7255e-05	0.00116091
ENSMUSG00000037003	209039	Tenc1	10276	-0.225179	0.0537003	4.19326	2.74973e-05	0.00116784
ENSMUSG00000028776	94242	Tinagl1	1992.45	-0.338709	0.0807929	4.19232	2.76122e-05	0.00116934
ENSMUSG00000037465	21847	Klf10	929.586	-0.486716	0.116164	4.18991	2.79067e-05	0.00117842
ENSMUSG00000031375	12111	Bgn	14762	0.364674	0.0870578	-4.18887	2.80352e-05	0.00118045
ENSMUSG00000070822	232875	Zscan18	76.8875	-0.573903	0.137385	4.17734	2.9494e-05	0.00123833
ENSMUSG00000020695	17534	Mrc2	2237.41	0.394528	0.0945278	-4.17367	2.99738e-05	0.00125488
ENSMUSG00000037679	70435	Inf2	1110.9	-0.400095	0.095968	4.16905	3.05877e-05	0.00127695
ENSMUSG00000020542	214384	Myocd	2354.79	-0.381702	0.091651	4.16473	3.11716e-05	0.00129764
ENSMUSG00000041957	67451	Pkp2	3718.23	-0.284125	0.0682349	4.16392	3.1283e-05	0.0012986
ENSMUSG00000036905	12260	C1qb	228.326	0.547668	0.131606	-4.16144	3.16248e-05	0.00130909
ENSMUSG00000021356	16364	Irf4	45.476	-0.612432	0.147217	4.16006	3.18163e-05	0.00131331
ENSMUSG00000053063	232413	Clec12a	53.7215	0.599489	0.144414	-4.15117	3.30778e-05	0.00136156
ENSMUSG00000049001	68169	A930038C07Rik	1106.78	0.284924	0.0688013	-4.14126	3.45399e-05	0.00141778
ENSMUSG00000021294	668303	Kif26a	880.007	-0.340977	0.0824431	4.13591	3.5355e-05	0.0014342
ENSMUSG00000025658	245684	Cnksr2	55.6722	-0.599856	0.144987	4.13732	3.51393e-05	0.0014342
ENSMUSG00000035000	13482	Dpp4	1429.19	0.347078	0.0839278	-4.13544	3.54281e-05	0.0014342
ENSMUSG00000023150	117198	Ivns1abp	13073.1	-0.354082	0.0856143	4.13578	3.53749e-05	0.0014342
ENSMUSG00000074030	102058	Exoc8	1001.38	-0.250789	0.0606119	4.13762	3.50926e-05	0.0014342
ENSMUSG00000036661	105841	Dennd3	530.008	-0.348774	0.0843731	4.13371	3.56957e-05	0.00144107
ENSMUSG00000027848	99543	Olfml3	1129.99	0.357554	0.0866095	-4.12835	3.65376e-05	0.00147101
ENSMUSG00000064080	14115	Fbln2	5121.11	0.38592	0.0935025	-4.12738	3.66921e-05	0.0014732
ENSMUSG00000036898	72154	Zfp157	207.857	-0.455068	0.110298	4.12582	3.6941e-05	0.00147915
ENSMUSG00000025017	83490	Pik3ap1	69.5877	0.601723	0.145885	-4.12463	3.71327e-05	0.00148279
ENSMUSG00000021130	108760	Galntl1	288.342	0.417804	0.101436	-4.11889	3.80696e-05	0.00151608
ENSMUSG00000031253	68792	Srpx2	227.714	0.467596	0.113549	-4.11801	3.82154e-05	0.00151777
ENSMUSG00000007877	21393	Tcap	56525.2	0.217774	0.0530571	-4.10452	4.05149e-05	0.00160476
ENSMUSG00000070643	20668	Sox13	943.004	-0.321641	0.0784852	4.09811	4.16529e-05	0.00163928
ENSMUSG00000016179	215303	Camk1g	286.419	-0.55562	0.135584	4.09797	4.16782e-05	0.00163928
ENSMUSG00000025880	17131	Smad7	1808	-0.36374	0.088766	4.09774	4.1721e-05	0.00163928
ENSMUSG00000031706	19724	Rfx1	558.356	-0.410754	0.10028	4.09608	4.20204e-05	0.00164664
ENSMUSG00000027797	13175	Dclk1	351.723	0.44075	0.107737	-4.09098	4.29557e-05	0.00167881
ENSMUSG00000025784	21922	Clec3b	3721.4	0.389303	0.0952312	-4.08797	4.3516e-05	0.0016962
ENSMUSG00000021367	13614	Edn1	148.018	0.536554	0.131316	-4.08597	4.38927e-05	0.00170636
ENSMUSG00000028086	50754	Fbxw7	2848.63	0.248295	0.0607865	-4.0847	4.41341e-05	0.00171122
ENSMUSG00000021065	53618	Fut8	940.918	0.270328	0.0662108	-4.08284	4.4488e-05	0.0017204
ENSMUSG00000061080	268890	Lsamp	166.966	0.434428	0.106459	-4.08073	4.48947e-05	0.0017315
ENSMUSG00000031673	12552	Cdh11	1508.65	0.349093	0.0855592	-4.08013	4.50108e-05	0.0017315
ENSMUSG00000019929	13179	Dcn	39604.2	0.276122	0.0676948	-4.07893	4.52442e-05	0.00173297
ENSMUSG00000024617	12322	Camk2a	2300.11	-0.250119	0.061323	4.07872	4.52849e-05	0.00173297
ENSMUSG00000026737	18718	Pip4k2a	569.708	0.298419	0.073188	-4.07743	4.55366e-05	0.00173808
ENSMUSG00000010047	15587	Hyal2	880.901	-0.280295	0.0687673	4.07599	4.58193e-05	0.00174434
ENSMUSG00000042429	11539	Adora1	648.804	-0.336577	0.0825937	4.0751	4.59948e-05	0.0017465
ENSMUSG00000007050	27756	Lsm2	289.247	0.367533	0.0902507	-4.07235	4.65408e-05	0.00175917
ENSMUSG00000033863	16601	Klf9	5041.62	0.284074	0.0697592	-4.07222	4.65682e-05	0.00175917
ENSMUSG00000006369	14114	Fbln1	16315.1	0.371514	0.0912718	-4.07041	4.693e-05	0.00176378
ENSMUSG00000029231	18595	Pdgfra	5198.64	0.261267	0.0641813	-4.07077	4.68571e-05	0.00176378
ENSMUSG00000018377	22344	Vezf1	2990.48	-0.198234	0.0487492	4.06641	4.77436e-05	0.00178642
ENSMUSG00000027583	72147	Zbtb46	279.222	-0.412967	0.10156	4.06625	4.77755e-05	0.00178642
ENSMUSG00000021983	50769	Atp8a2	329.481	-0.43643	0.10736	4.06513	4.80066e-05	0.0017905
ENSMUSG00000063972	14536	Nr6a1	127.916	-0.498181	0.122689	4.06051	4.89656e-05	0.00182164
ENSMUSG00000079465	12828	Col4a3	394.633	0.330633	0.0814722	-4.05823	4.94466e-05	0.00183489
ENSMUSG00000040747	12508	Cd53	143.08	0.505657	0.12481	-4.05141	5.09106e-05	0.00187501
ENSMUSG00000054728	218194	Phactr1	1483.45	-0.30453	0.0751841	4.05046	5.1118e-05	0.00187795
ENSMUSG00000034708	14824	Grn	5208.65	0.305303	0.0754994	-4.04377	5.25978e-05	0.00191318
ENSMUSG00000072941	20657	Sod3	2459.67	0.360555	0.0891517	-4.04429	5.2483e-05	0.00191318
ENSMUSG00000031785	14766	Gpr56	1478.34	-0.279276	0.0690616	4.04386	5.25775e-05	0.00191318
ENSMUSG00000017466	21858	Timp2	14172.5	0.269689	0.0666784	-4.04462	5.24078e-05	0.00191318
ENSMUSG00000061119	72461	Prcp	908.499	0.328326	0.081273	-4.0398	5.34979e-05	0.00194112
ENSMUSG00000028036	19220	Ptgfr	6930.32	-0.219839	0.0544337	4.03866	5.37568e-05	0.0019428
ENSMUSG00000044991	73747	1110034G24Rik	723.499	-0.383416	0.0949416	4.03844	5.38087e-05	0.0019428
ENSMUSG00000029673	319974	Auts2	1235.23	-0.269647	0.0667818	4.03774	5.39688e-05	0.0019438
ENSMUSG00000060814	100503386	Gm4980	287.409	0.480511	0.11903	-4.03688	5.41671e-05	0.00194618
ENSMUSG00000041930	433940	BC057022	197.093	0.493108	0.122216	-4.03474	5.46639e-05	0.00195923
ENSMUSG00000037110	241694	Ralgapa2	2157.73	-0.275613	0.0683435	4.03275	5.51268e-05	0.00197102
ENSMUSG00000060397	243833	Zfp128	184.477	-0.450895	0.111831	4.03194	5.53182e-05	0.00197306
ENSMUSG00000032575	74840	Manf	2157.55	0.247738	0.0614867	-4.02913	5.59839e-05	0.00198716
ENSMUSG00000020716	18015	Nf1	1807.35	-0.280349	0.0695734	4.02954	5.58853e-05	0.00198716
ENSMUSG00000000359	19700	Rem1	350.996	-0.362043	0.0899066	4.02688	5.6523e-05	0.00200146
ENSMUSG00000021481	26919	Zfp346	907.633	-0.346681	0.0861495	4.02419	5.71727e-05	0.00200994
ENSMUSG00000042834	27528	D0H4S114	988.49	0.482377	0.119845	-4.02502	5.69704e-05	0.00200994
ENSMUSG00000027199	67092	Gatm	259.247	0.485837	0.120726	-4.02431	5.71419e-05	0.00200994
ENSMUSG00000031762	17750	Mt2	230.264	0.455979	0.113361	-4.02237	5.7615e-05	0.00202065
ENSMUSG00000029321	75750	Slc10a6	284.44	0.473379	0.117889	-4.01548	5.9326e-05	0.0020757
ENSMUSG00000028931	16498	Kcnab2	103.007	0.545718	0.135953	-4.01403	5.96915e-05	0.00208353
ENSMUSG00000032744	56198	Heyl	2589.81	0.259539	0.0647032	-4.01123	6.04032e-05	0.00210338
ENSMUSG00000067276	12338	Capn6	166.634	0.467871	0.116706	-4.00898	6.09819e-05	0.00211351
ENSMUSG00000018604	21386	Tbx3	315.61	-0.49365	0.123123	4.00941	6.08705e-05	0.00211351
ENSMUSG00000037434	22782	Slc30a1	719.581	-0.325109	0.0812987	3.99894	6.36269e-05	0.00219483
ENSMUSG00000033066	14457	Gas7	1561.17	0.390792	0.0978065	-3.99556	6.45407e-05	0.00222114
ENSMUSG00000058793	110911	Cds2	14466.2	-0.18025	0.0452253	3.98559	6.73131e-05	0.00231114
ENSMUSG00000054752	319636	Fsd1l	1138.71	-0.35168	0.0882669	3.98428	6.7684e-05	0.00231845
ENSMUSG00000009569	239719	Mkl2	1890.1	-0.263558	0.0661642	3.98339	6.79394e-05	0.00232179
ENSMUSG00000055546	276891	Timd4	173.955	0.501591	0.126047	-3.97941	6.90868e-05	0.00235552
ENSMUSG00000006542	241113	Prkag3	88.2264	-0.548401	0.137926	3.97606	7.00675e-05	0.002381
ENSMUSG00000026921	353156	Egfl7	1989.22	-0.277953	0.069912	3.97575	7.01581e-05	0.002381
ENSMUSG00000037379	100689	Spon2	1032.14	0.457944	0.115307	-3.97152	7.1417e-05	0.00241814
ENSMUSG00000044461	219134	Shisa2	288.943	0.432197	0.108857	-3.97031	7.17783e-05	0.00242479
ENSMUSG00000038193	15111	Hand2	1252.4	0.292471	0.073829	-3.96146	7.44918e-05	0.00250493
ENSMUSG00000006205	56213	Htra1	5262.84	0.252184	0.0636808	-3.96012	7.49128e-05	0.00251334
ENSMUSG00000033883	241944	D3Ertd254e	479.289	-0.370707	0.0937593	3.95382	7.69136e-05	0.00257459
ENSMUSG00000005142	17159	Man2b1	1463.62	0.326636	0.0826751	-3.95084	7.78761e-05	0.00259499
ENSMUSG00000021806	18074	Nid2	2319.55	0.287865	0.0729189	-3.94774	7.88919e-05	0.00262289
ENSMUSG00000033624	319518	Pdpr	946.153	-0.326203	0.0826899	3.9449	7.98338e-05	0.00264821
ENSMUSG00000051076	242122	Vtcn1	97.7186	0.523907	0.133468	-3.92535	8.66053e-05	0.00285351
ENSMUSG00000030386	67370	Zfp606	372.522	-0.381631	0.0974285	3.91703	8.96455e-05	0.00294707
ENSMUSG00000039683	330222	Sdk1	104.348	0.52217	0.133344	-3.91597	9.00405e-05	0.00295345
ENSMUSG00000028248	66625	Sfrs18	2464.36	-0.271591	0.0694967	3.90797	9.30767e-05	0.00304624
ENSMUSG00000039126	353211	Prune2	1014.27	-0.376028	0.0963245	3.90376	9.4709e-05	0.00309278
ENSMUSG00000052920	19091	Prkg1	700.943	-0.320541	0.0821891	3.90005	9.61729e-05	0.00313362
ENSMUSG00000061603	238161	Akap6	9003.24	-0.243032	0.0624411	3.89218	9.93469e-05	0.00322987
ENSMUSG00000006204	71395	5430419D17Rik	191.329	-0.455136	0.117041	3.88869	0.000100788	0.00326949
ENSMUSG00000030302	11941	Atp2b2	435.767	-0.478908	0.123314	3.88363	0.000102907	0.00332498
ENSMUSG00000034487	68304	Kdelc2	1092.34	0.276882	0.0713221	-3.88214	0.000103542	0.00332742
ENSMUSG00000036501	225358	Fam13b	679.077	-0.292614	0.075382	3.88175	0.000103706	0.00332742
ENSMUSG00000040441	216441	Slc26a10	336.685	-0.490753	0.126402	3.88249	0.000103393	0.00332742
ENSMUSG00000040855	194590	Reps2	163.691	0.468089	0.120648	-3.87978	0.000104551	0.00334442
ENSMUSG00000031906	58994	Smpd3	761.889	0.440229	0.113477	-3.87945	0.000104691	0.00334442
ENSMUSG00000023992	83433	Trem2	84.2576	0.55276	0.142672	-3.87435	0.000106908	0.00340784
ENSMUSG00000037206	26968	Islr	1750.73	0.372822	0.0964604	-3.86503	0.000111076	0.00353016
ENSMUSG00000030074	232313	Gxylt2	116.135	0.566651	0.146622	-3.8647	0.000111226	0.00353016
ENSMUSG00000026177	18173	Slc11a1	156.83	0.454941	0.117836	-3.86079	0.000113023	0.00357947
ENSMUSG00000046152	171167	Fut10	148.894	0.432146	0.111953	-3.86007	0.000113353	0.00358219
ENSMUSG00000023169	105727	Slc38a1	3527.03	-0.195115	0.0505706	3.85828	0.000114189	0.00359456
ENSMUSG00000000142	12006	Axin2	466.621	-0.345906	0.0896789	3.85716	0.000114711	0.00360188
ENSMUSG00000055976	71908	Cldn23	105.66	-0.505124	0.131071	3.85382	0.000116287	0.00364358
ENSMUSG00000030096	21366	Slc6a6	4625.9	-0.351032	0.0911502	3.85114	0.000117571	0.00367597
ENSMUSG00000024236	225115	Svil	15488.1	-0.243289	0.0632321	3.84756	0.000119301	0.00372214
ENSMUSG00000045287	237847	Rtn4rl1	532.714	0.313757	0.081571	-3.84643	0.000119854	0.00373146
ENSMUSG00000001506	12842	Col1a1	13773.2	0.55174	0.143596	-3.84231	0.000121879	0.00378651
ENSMUSG00000000440	19016	Pparg	276.505	-0.419204	0.109278	3.83613	0.00012499	0.00386678
ENSMUSG00000078619	83796	Smarcd2	1011.96	0.25099	0.0654232	-3.83641	0.000124845	0.00386678
ENSMUSG00000048458	109050	6530418L21Rik	1644.7	0.297991	0.077774	-3.83149	0.000127368	0.00393208
ENSMUSG00000031770	64209	Herpud1	8712.56	0.244657	0.0638756	-3.83022	0.000128031	0.00393863
ENSMUSG00000020806	217344	Rhbdf2	526.482	-0.292486	0.0763661	3.83005	0.000128116	0.00393863
ENSMUSG00000041361	102371	Myzap	10256.2	-0.281905	0.0736463	3.82782	0.000129281	0.00396615
ENSMUSG00000028581	16792	Laptm5	748.164	0.455717	0.119103	-3.82624	0.000130117	0.00398348
ENSMUSG00000009772	74137	Nuak2	179.473	0.411974	0.107742	-3.8237	0.000131463	0.00399003
ENSMUSG00000003227	13608	Edar	107.388	-0.5356	0.140031	3.82486	0.000130849	0.00399003
ENSMUSG00000045875	11549	Adra1a	98.3553	0.543562	0.142143	-3.82405	0.000131279	0.00399003
ENSMUSG00000000308	12716	Ckmt1	198.853	0.528424	0.138212	-3.82328	0.000131689	0.00399003
ENSMUSG00000031104	19337	Rab33a	138.465	-0.502878	0.131528	3.82336	0.000131645	0.00399003
ENSMUSG00000029096	78558	Htra3	10370.7	0.329417	0.0861896	-3.822	0.000132373	0.00400252
ENSMUSG00000022623	58234	Shank3	2793.35	-0.246922	0.0646173	3.8213	0.00013275	0.00400566
ENSMUSG00000030655	233789	Smg1	3226.27	-0.329547	0.0862693	3.81998	0.000133463	0.00401892
ENSMUSG00000026478	226519	Lamc1	14519.8	0.275484	0.0721696	-3.81718	0.000134985	0.00404817
ENSMUSG00000048779	233571	P2ry6	244.879	0.435358	0.11413	-3.81459	0.000136409	0.00408254
ENSMUSG00000042476	18670	Abcb4	741.794	-0.365139	0.0957539	3.81331	0.000137118	0.00409542
ENSMUSG00000021112	56217	Mpp5	1152.26	-0.347054	0.0910666	3.81099	0.000138412	0.00412568
ENSMUSG00000018381	66610	Abi3	489.559	-0.371653	0.0976226	3.80704	0.000140643	0.00416039
ENSMUSG00000032515	215418	Csrnp1	876.204	0.562073	0.147599	-3.80811	0.000140033	0.00416039
ENSMUSG00000032737	16332	Inppl1	10596.5	-0.258616	0.0679477	3.80611	0.000141168	0.00416039
ENSMUSG00000033278	19274	Ptprm	4564.72	-0.194386	0.0510745	3.80593	0.000141275	0.00416039
ENSMUSG00000032633	216805	Flcn	2393.56	-0.273973	0.0719696	3.80678	0.000140786	0.00416039
ENSMUSG00000050930	74393	4933403G14Rik	185.476	-0.451807	0.11867	3.80726	0.000140517	0.00416039
ENSMUSG00000054200	107221	O3far1	12.5919	-0.449715	0.118205	3.80455	0.000142065	0.00417026
ENSMUSG00000011877	216963	Git1	2889.66	-0.194627	0.051159	3.80435	0.000142177	0.00417026
ENSMUSG00000062901	75785	Klhl24	6825.23	-0.246256	0.0648125	3.79951	0.000144984	0.00424411
ENSMUSG00000039137	73750	Whrn	647.458	0.340655	0.0896706	-3.79896	0.000145303	0.004245
ENSMUSG00000028413	14595	B4galt1	5171.33	0.275939	0.0727056	-3.79529	0.00014747	0.00429974
ENSMUSG00000052572	23859	Dlg2	162.604	0.415437	0.109491	-3.79426	0.000148082	0.00430903
ENSMUSG00000042353	333315	Frem3	42.2357	-0.563678	0.148623	3.79267	0.000149037	0.00432826
ENSMUSG00000051041	244198	Olfml1	448.623	0.397767	0.104902	-3.7918	0.000149557	0.0043348
ENSMUSG00000024663	74760	Rab3il1	771.003	0.349446	0.0922345	-3.78867	0.000151454	0.00438112
ENSMUSG00000034593	17918	Myo5a	860.88	0.26636	0.0703498	-3.78623	0.000152952	0.00441577
ENSMUSG00000042581	210417	Thsd7b	49.1448	0.558547	0.14789	-3.77679	0.000158864	0.00457748
ENSMUSG00000024331	13506	Dsc2	6463.83	-0.193088	0.0511854	3.77233	0.00016173	0.00464158
ENSMUSG00000030257	259302	Srgap3	167.197	0.424856	0.112638	-3.77186	0.000162037	0.00464158
ENSMUSG00000073565	71373	Prr16	18.237	0.532029	0.141035	-3.77233	0.000161733	0.00464158
ENSMUSG00000012640	69930	Zfp715	859.724	-0.314558	0.0836595	3.75998	0.000169925	0.00485807
ENSMUSG00000042684	74091	Npl	185.51	0.486256	0.129435	-3.75675	0.000172133	0.00491165
ENSMUSG00000021281	21928	Tnfaip2	1021.24	-0.275937	0.0735226	3.75309	0.000174665	0.00495503
ENSMUSG00000046556	79233	Zfp319	671.636	-0.28495	0.0759198	3.75331	0.000174517	0.00495503
ENSMUSG00000033585	17984	Ndn	672.392	0.311072	0.0828633	-3.75404	0.000174009	0.00495503
ENSMUSG00000055148	16598	Klf2	3295.97	0.509729	0.135988	-3.74834	0.000178008	0.00502749
ENSMUSG00000045613	243764	Chrm2	3988.72	-0.283606	0.0756684	3.74801	0.000178246	0.00502749
ENSMUSG00000036362	74191	P2ry13	67.3445	0.537459	0.143364	-3.74892	0.0001776	0.00502749
ENSMUSG00000047045	209497	Tmem164	1015.39	0.311831	0.083228	-3.74671	0.000179169	0.00504384
ENSMUSG00000070436	12406	Serpinh1	8129.45	0.289715	0.0773445	-3.74577	0.000179841	0.00505019
ENSMUSG00000039218	75956	Srrm2	13199.9	-0.250081	0.0667696	3.74543	0.000180082	0.00505019
ENSMUSG00000069920	97440	B3gnt9-ps	285.436	0.376602	0.100565	-3.74486	0.000180492	0.00505205
ENSMUSG00000026971	16420	Itgb6	538.423	0.355641	0.0950391	-3.74205	0.000182523	0.00507988
ENSMUSG00000028630	69181	Dyrk2	1022.91	-0.313606	0.083799	3.74236	0.000182301	0.00507988
ENSMUSG00000029314	231510	Agpat9	551.709	-0.362802	0.0969305	3.74291	0.000181903	0.00507988
ENSMUSG00000075289	107239	Carns1	2082.3	-0.252084	0.0674086	3.73964	0.000184281	0.0051191
ENSMUSG00000075318	110876	Scn2a1	65.38	0.523818	0.140111	-3.7386	0.000185049	0.00513074
ENSMUSG00000019122	20308	Ccl9	298.16	0.421503	0.112787	-3.73717	0.000186101	0.00515019
ENSMUSG00000038530	19736	Rgs4	490.915	-0.390528	0.104585	3.73405	0.000188422	0.00520463
ENSMUSG00000049436	22268	Upk1b	770.914	0.452413	0.121295	-3.72985	0.000191594	0.00528232
ENSMUSG00000074825	73338	Itpripl1	343.069	0.332382	0.0891518	-3.72827	0.000192797	0.00530554
ENSMUSG00000029373	56744	Pf4	338.039	0.435763	0.117094	-3.72147	0.000198065	0.00544031
ENSMUSG00000050222	239114	Il17d	138.402	0.47519	0.127853	-3.7167	0.000201839	0.00552615
ENSMUSG00000018927	20305	Ccl6	479.639	0.437943	0.117835	-3.71657	0.000201942	0.00552615
ENSMUSG00000058715	14127	Fcer1g	210.998	0.449593	0.121064	-3.71369	0.000204262	0.00557925
ENSMUSG00000028476	53614	Reck	994.804	0.246491	0.0663884	-3.71285	0.000204935	0.00558723
ENSMUSG00000055322	21961	Tns1	45488.8	-0.185272	0.0499179	3.71153	0.000206014	0.00560625
ENSMUSG00000038642	13040	Ctss	396.962	0.485078	0.130715	-3.71097	0.00020647	0.00560827
ENSMUSG00000074971	67606	Fibin	421.466	0.39498	0.106487	-3.70917	0.00020794	0.00563779
ENSMUSG00000015340	13058	Cybb	219.386	0.486009	0.131075	-3.70786	0.000209017	0.00565656
ENSMUSG00000024672	109225	Ms4a7	98.5008	0.539392	0.145652	-3.70328	0.000212826	0.00574905
ENSMUSG00000051316	24074	Taf7	339.397	0.328638	0.0887785	-3.70178	0.000214093	0.00577264
ENSMUSG00000040254	108151	Sema3d	874.22	0.391401	0.10582	-3.69873	0.000216681	0.00583173
ENSMUSG00000014592	100072	Camta1	3292.31	-0.26932	0.0728316	3.69785	0.000217435	0.00584132
ENSMUSG00000019828	14816	Grm1	829.314	-0.329214	0.0891019	3.6948	0.000220058	0.005901
ENSMUSG00000051331	12288	Cacna1c	3628.07	-0.318985	0.0863532	3.69396	0.000220792	0.0059099
ENSMUSG00000034163	216345	Zfc3h1	1076.51	-0.336576	0.0911281	3.69344	0.000221244	0.00591124
ENSMUSG00000035273	15442	Hpse	102.67	0.478212	0.129645	-3.68861	0.000225481	0.00600581
ENSMUSG00000042842	20708	Serpinb6b	2252.07	-0.27024	0.0732661	3.68848	0.000225601	0.00600581
ENSMUSG00000008932	242607	Slc1a7	311.087	0.338104	0.0917571	-3.68477	0.00022891	0.00607409
ENSMUSG00000048482	12064	Bdnf	63.2108	-0.512827	0.139178	3.68468	0.000228993	0.00607409
ENSMUSG00000015090	19215	Ptgds	373.539	-0.545354	0.148079	3.68285	0.000230643	0.00609586
ENSMUSG00000027978	19142	Prss12	134.114	0.463931	0.126173	-3.67695	0.000236037	0.00622723
ENSMUSG00000036943	235442	Rab8b	823.76	0.243075	0.0661888	-3.67246	0.00024023	0.00632647
ENSMUSG00000054889	109620	Dsp	42260.3	-0.25425	0.0692931	3.66919	0.000243316	0.00638486
ENSMUSG00000049119	242297	Fam110b	211.049	-0.484593	0.132434	3.65913	0.00025307	0.00662899
ENSMUSG00000044456	217835	Rin3	841.847	-0.306799	0.0838737	3.65787	0.000254317	0.00663016
ENSMUSG00000044707	380694	Ccnjl	72.3202	0.533357	0.145817	-3.65772	0.000254468	0.00663016
ENSMUSG00000005054	13014	Cstb	430.055	0.324968	0.0888444	-3.65772	0.000254465	0.00663016
ENSMUSG00000020899	237823	Pfas	773.963	-0.256063	0.0701267	3.65144	0.000260778	0.00678253
ENSMUSG00000048763	15410	Hoxb3	123.949	-0.454686	0.124675	3.64696	0.000265358	0.00688946
ENSMUSG00000026639	16780	Lamb3	2648.99	0.345715	0.0948071	-3.64651	0.00026583	0.00688954
ENSMUSG00000020777	11430	Acox1	7197.53	-0.20723	0.0569959	3.63587	0.000277045	0.00716225
ENSMUSG00000022206	18162	Npr3	12505.2	0.2446	0.0673113	-3.63386	0.000279212	0.00719828
ENSMUSG00000022912	19128	Pros1	1532.87	0.239917	0.0660806	-3.63067	0.000282683	0.00727341
ENSMUSG00000024621	12978	Csf1r	2229.63	0.49677	0.136841	-3.63028	0.000283116	0.00727341
ENSMUSG00000020363	14584	Gfpt2	2211.87	0.305878	0.0842927	-3.62877	0.000284779	0.00730337
ENSMUSG00000020407	22271	Upp1	92.6937	-0.465222	0.128293	3.62625	0.000287568	0.00736203
ENSMUSG00000061143	433586	Maml3	336.756	-0.350991	0.0968094	3.62559	0.000288301	0.00736797
ENSMUSG00000033777	279572	Tlr13	77.2613	0.519786	0.143475	-3.62283	0.000291395	0.00742152
ENSMUSG00000028273	56376	Pdlim5	12807	-0.326753	0.0901929	3.62282	0.000291406	0.00742152
ENSMUSG00000030218	17313	Mgp	20460.9	0.27822	0.0768431	-3.62062	0.0002939	0.00747207
ENSMUSG00000052957	14451	Gas1	3516.83	0.247496	0.0683708	-3.6199	0.000294715	0.00747985
ENSMUSG00000075324	60344	Fign	828.793	0.286501	0.079158	-3.61935	0.00029534	0.00748279
ENSMUSG00000040451	208449	Sgms1	1799.88	-0.236504	0.0653827	3.61723	0.000297772	0.00753142
ENSMUSG00000067786	18111	Nnat	72.1999	-0.52919	0.146514	3.61188	0.000303983	0.00764903
ENSMUSG00000034903	319876	Cobll1	3787.83	-0.23827	0.0659641	3.61212	0.000303701	0.00764903
ENSMUSG00000028082	27059	Sh3d19	1356.3	0.259826	0.0719272	-3.61235	0.000303431	0.00764903
ENSMUSG00000026727	20163	Rsu1	1363.13	0.234134	0.0648466	-3.61058	0.000305512	0.00767436
ENSMUSG00000038604	75687	Fam65a	3073.78	-0.232361	0.0643931	3.60848	0.000307996	0.00772354
ENSMUSG00000030852	57752	Tacc2	7536.02	-0.284994	0.0790039	3.60734	0.000309351	0.00774431
ENSMUSG00000068394	99100	Cep152	170.45	0.414168	0.114889	-3.60493	0.000312234	0.00780319
ENSMUSG00000030116	50530	Mfap5	1234.43	0.340383	0.0945161	-3.60133	0.000316596	0.00789877
ENSMUSG00000054690	59308	Emcn	3082.89	0.218927	0.0608145	-3.59992	0.000318316	0.00792823
ENSMUSG00000021219	50779	Rgs6	907.236	-0.267639	0.074513	3.59184	0.000328351	0.00815054
ENSMUSG00000042379	71690	Esm1	51.7239	0.529165	0.147456	-3.58862	0.000332427	0.00823781
ENSMUSG00000032418	17436	Me1	1411.92	-0.277532	0.0773646	3.58733	0.000334081	0.00826485
ENSMUSG00000021365	18003	Nedd9	919.327	0.341261	0.0952613	-3.58237	0.000340497	0.0083953
ENSMUSG00000046491	69183	C1qtnf2	292.237	0.413472	0.115523	-3.57914	0.000344733	0.0084855
ENSMUSG00000047414	399558	Flrt2	1217.45	0.343779	0.0961037	-3.57717	0.000347336	0.00849267
ENSMUSG00000029553	21426	Tfec	15.9264	0.507399	0.141827	-3.57758	0.000346788	0.00849267
ENSMUSG00000023044	246277	Csad	556.885	-0.35991	0.100607	3.57739	0.000347047	0.00849267
ENSMUSG00000032420	23959	Nt5e	997.045	-0.336593	0.094094	3.5772	0.000347295	0.00849267
ENSMUSG00000069833	66395	Ahnak	25904.3	-0.205912	0.0576539	3.57151	0.000354925	0.00866133
ENSMUSG00000030579	22177	Tyrobp	264.832	0.456635	0.127868	-3.57115	0.000355412	0.00866133
ENSMUSG00000026121	20353	Sema4c	1000.9	-0.249038	0.0697468	3.5706	0.000356168	0.00866539
ENSMUSG00000044629	380686	Cnrip1	142.719	0.444101	0.124436	-3.56892	0.000358456	0.00870663
ENSMUSG00000046561	271970	Arsj	66.1839	0.510077	0.142952	-3.56817	0.000359488	0.00871728
ENSMUSG00000009185	20307	Ccl8	49.2474	0.525375	0.147331	-3.56596	0.000362529	0.00877656
ENSMUSG00000039202	54608	Abhd2	575.415	-0.293892	0.0824381	3.565	0.000363855	0.00879416
ENSMUSG00000022512	12737	Cldn1	36.1409	0.531572	0.14926	-3.56139	0.0003689	0.00890144
ENSMUSG00000022346	17869	Myc	191.493	0.463336	0.130229	-3.55786	0.000373893	0.00900714
ENSMUSG00000000915	29816	Hip1r	644.039	-0.279202	0.0785281	3.55544	0.000377346	0.00904584
ENSMUSG00000020591	18217	Ntsr2	463.793	-0.281602	0.0792011	3.55553	0.000377216	0.00904584
ENSMUSG00000030583	74206	Sipa1l3	548.02	0.311772	0.087791	-3.55129	0.000383346	0.0091747
ENSMUSG00000093674	67945	Rpl41	1065.45	0.268551	0.0756318	-3.55077	0.000384112	0.0091781
ENSMUSG00000066809	67945	Gm10180	1065.45	0.268551	0.0756318	-3.55077	0.000384112	0.0091781
ENSMUSG00000069648	67945	Gm3699	1065.45	0.268551	0.0756318	-3.55077	0.000384112	0.0091781
ENSMUSG00000074660	67945	Gm10736	1065.45	0.268551	0.0756318	-3.55077	0.000384112	0.0091781
ENSMUSG00000060143	67945	Gm10076	1065.45	0.268551	0.0756318	-3.55077	0.000384112	0.0091781
ENSMUSG00000003348	208228	Mob3a	469.578	0.409023	0.11525	-3.549	0.000386691	0.00920975
ENSMUSG00000030486	54678	Zfp108	67.5785	-0.482719	0.13601	3.54914	0.000386495	0.00920975
ENSMUSG00000029661	12843	Col1a2	13262.6	0.497018	0.140192	-3.54526	0.000392219	0.00932631
ENSMUSG00000015396	12522	Cd83	183.532	0.427076	0.120483	-3.54469	0.000393079	0.00933165
ENSMUSG00000031595	68797	Pdgfrl	288.298	0.397526	0.112177	-3.54374	0.000394494	0.00934602
ENSMUSG00000048387	23967	Osr1	1120.45	0.346533	0.0977959	-3.54343	0.000394956	0.00934602
ENSMUSG00000041827	231655	Oasl1	21.2649	0.519831	0.146796	-3.54117	0.000398352	0.00938447
ENSMUSG00000029616	67397	Erp29	1362.42	0.217375	0.0613792	-3.54151	0.000397836	0.00938447
ENSMUSG00000032038	20443	St3gal4	1383.06	0.229657	0.064855	-3.54108	0.000398497	0.00938447
ENSMUSG00000043943	72560	Naalad2	637.447	0.297482	0.0840475	-3.53945	0.00040096	0.00941666
ENSMUSG00000033060	380928	Lmo7	13545.7	-0.218592	0.0617609	3.53933	0.000401145	0.00941666
ENSMUSG00000053279	11668	Aldh1a1	1145.75	0.302937	0.0856259	-3.53791	0.000403309	0.00945235
ENSMUSG00000038984	239364	Tspyl5	320.728	-0.347718	0.0984395	3.5323	0.000411962	0.0096331
ENSMUSG00000021765	14313	Fst	98.1127	0.5099	0.144363	-3.53206	0.000412332	0.0096331
ENSMUSG00000023805	20975	Synj2	2147.85	-0.226099	0.0640922	3.52772	0.000419161	0.00977711
ENSMUSG00000037922	242248	Bank1	35.54	0.52584	0.149157	-3.5254	0.000422843	0.00984735
ENSMUSG00000052160	104759	Pld4	462.889	0.439615	0.124718	-3.52487	0.000423684	0.00985133
ENSMUSG00000020100	71279	Slc29a3	321.543	0.374849	0.106463	-3.52093	0.000430031	0.0099831
ENSMUSG00000057457	18675	Phex	13.2807	0.466001	0.132563	-3.51532	0.000439219	0.0101803
ENSMUSG00000074794	105171	Arrdc3	3493.61	0.24954	0.0710533	-3.51201	0.000444736	0.0102647
ENSMUSG00000000732	50723	Icosl	605.578	-0.31592	0.0899582	3.51185	0.000445	0.0102647
ENSMUSG00000059173	18573	Pde1a	566.369	0.300931	0.0856996	-3.51146	0.000445652	0.0102647
ENSMUSG00000021134	20384	Srsf5	2315.92	-0.265454	0.0755785	3.51229	0.000444258	0.0102647
ENSMUSG00000031827	72042	Cotl1	668.017	0.393884	0.112282	-3.508	0.000451483	0.0103827
ENSMUSG00000002100	17868	Mybpc3	58681	-0.320838	0.0915007	3.5064	0.000454205	0.010429
ENSMUSG00000028159	26377	Dapp1	948.562	-0.332052	0.0947233	3.50549	0.000455765	0.0104485
ENSMUSG00000040264	229898	Gbp5	355.917	0.371776	0.106108	-3.50374	0.000458766	0.0105009
ENSMUSG00000025265	14163	Fgd1	475.405	0.311238	0.0888803	-3.50176	0.000462189	0.0105628
ENSMUSG00000034947	217203	Tmem106a	253.023	0.388771	0.111216	-3.49563	0.000472946	0.0107918
ENSMUSG00000069601	11735	Ank3	5413.31	-0.20069	0.0574192	3.49518	0.000473746	0.0107933
ENSMUSG00000036158	106042	Prickle1	1094.85	0.300617	0.0860765	-3.49244	0.000478635	0.0108878
ENSMUSG00000053411	52609	Cbx7	1522.13	-0.261205	0.0748204	3.4911	0.000481041	0.010892
ENSMUSG00000032578	12700	Cish	1014.51	0.515014	0.147488	-3.49191	0.000479579	0.010892
ENSMUSG00000030104	192193	Edem1	823.772	0.277228	0.0794841	-3.48784	0.000486934	0.0110084
ENSMUSG00000064225	75552	Paqr9	1330.92	-0.228114	0.0655226	3.48145	0.000498704	0.0112572
ENSMUSG00000033350	54371	Chst2	127.454	0.413817	0.118891	-3.48063	0.000500234	0.0112744
ENSMUSG00000062591	22153	Tubb4a	226.389	0.418132	0.120198	-3.4787	0.000503852	0.0113386
ENSMUSG00000049516	101685	Spty2d1	805.189	0.267973	0.0770732	-3.47686	0.000507323	0.0113819
ENSMUSG00000049807	58996	Arhgap23	1409.72	-0.268495	0.0772189	3.47706	0.000506947	0.0113819
ENSMUSG00000022432	140557	Smc1b	109.006	-0.498388	0.143372	3.47619	0.000508586	0.0113928
ENSMUSG00000021809	67725	Nudt13	695.264	-0.247484	0.0712432	3.47379	0.000513155	0.0114777
ENSMUSG00000022565	18810	Plec	11846.4	-0.322523	0.092946	3.47	0.000520455	0.0116232
ENSMUSG00000042436	76293	Mfap4	3546.85	0.513859	0.148186	-3.46767	0.000524997	0.0117069
ENSMUSG00000026604	19250	Ptpn14	3865.99	-0.20668	0.0596343	3.46579	0.000528672	0.011771
ENSMUSG00000026938	14133	Fcna	305.439	0.517021	0.149331	-3.46224	0.000535698	0.0118847
ENSMUSG00000024193	21652	Phf1	1182.37	-0.211022	0.0609541	3.46198	0.000536208	0.0118847
ENSMUSG00000046280	214547	She	1087.44	-0.247718	0.0715637	3.4615	0.000537176	0.0118882
ENSMUSG00000038170	83679	Pde4dip	62130.3	-0.213885	0.0618104	3.46033	0.000539509	0.0119219
ENSMUSG00000045658	98496	Pid1	544.316	0.323371	0.0934691	-3.45966	0.000540866	0.011934
ENSMUSG00000042228	17096	Lyn	671.087	0.242703	0.0702029	-3.45717	0.00054589	0.0120268
ENSMUSG00000036908	54445	Unc93b1	673.137	0.347936	0.100808	-3.45149	0.000557505	0.0122643
ENSMUSG00000044177	278507	Wfikkn2	862.282	-0.260929	0.0756601	3.4487	0.000563287	0.012373
ENSMUSG00000044197	80290	Gpr146	3216.98	-0.228552	0.0662877	3.44789	0.000564992	0.0123734
ENSMUSG00000022769	64136	Sdf2l1	385.821	0.324027	0.0939775	-3.44792	0.00056492	0.0123734
ENSMUSG00000040767	78372	Snrnp25	169.412	0.377868	0.109711	-3.44422	0.000572716	0.0125239
ENSMUSG00000038780	75788	Smurf1	1808.78	-0.230686	0.0670432	3.44086	0.000579867	0.0126614
ENSMUSG00000033713	71375	Foxn3	996.893	-0.259861	0.0755316	3.44043	0.000580796	0.0126629
ENSMUSG00000059534	66152	Uqcr10	6797.65	0.205494	0.0597544	-3.43898	0.000583901	0.0127117
ENSMUSG00000021876	58809	Rnase4	2429.37	0.290367	0.0844758	-3.43728	0.000587586	0.012773
ENSMUSG00000048756	56484	Foxo3	1122.82	-0.275138	0.0801245	3.43388	0.00059501	0.0128865
ENSMUSG00000006494	228026	Pdk1	6033	-0.255884	0.0745217	3.43369	0.000595436	0.0128865
ENSMUSG00000030103	20893	Bhlhe40	3001.65	-0.261099	0.0760383	3.43378	0.000595217	0.0128865
ENSMUSG00000056185	225861	Snx32	257.449	-0.349771	0.102011	3.42875	0.000606367	0.0131038
ENSMUSG00000031461	17930	Myom2	71743.6	-0.316931	0.0924699	3.4274	0.000609393	0.0131498
ENSMUSG00000030022	101401	Adamts9	593.644	-0.358559	0.104711	3.42428	0.000616441	0.0132824
ENSMUSG00000027864	19221	Ptgfrn	7493.22	0.231444	0.0676426	-3.42157	0.000622601	0.0133955
ENSMUSG00000060572	17150	Mfap2	258.297	0.40516	0.118494	-3.41924	0.000627973	0.0134913
ENSMUSG00000066800	24014	Rnasel	202.989	0.390678	0.114348	-3.41656	0.000634176	0.0136047
ENSMUSG00000018398	20362	39692	3559.83	0.236804	0.0694289	-3.41074	0.000647872	0.0138782
ENSMUSG00000034664	16399	Itga2b	171.459	-0.456984	0.134122	3.40723	0.000656267	0.0139963
ENSMUSG00000002831	57435	Plin4	8957.24	-0.210902	0.0619054	3.40684	0.000657191	0.0139963
ENSMUSG00000031748	14681	Gnao1	6981.57	-0.23852	0.0699959	3.40763	0.000655306	0.0139963
ENSMUSG00000049130	12273	C5ar1	326.442	0.416332	0.122188	-3.4073	0.000656093	0.0139963
ENSMUSG00000006651	11803	Aplp1	395.071	0.381448	0.111988	-3.40615	0.000658853	0.0140114
ENSMUSG00000027288	20402	Zfp106	29202.2	-0.223145	0.0655226	3.40562	0.00066015	0.0140186
ENSMUSG00000030560	13032	Ctsc	1763.96	0.275542	0.0809394	-3.40431	0.00066332	0.0140656
ENSMUSG00000018217	18858	Pmp22	3019.67	0.26464	0.0777677	-3.40296	0.00066661	0.014115
ENSMUSG00000038670	233199	Mybpc2	510.699	-0.391273	0.115075	3.40017	0.000673449	0.0142393
ENSMUSG00000028528	72685	Dnajc6	53.6173	0.498621	0.146712	-3.39864	0.000677217	0.0142791
ENSMUSG00000037035	16324	Inhbb	99.3124	-0.452079	0.133138	3.39558	0.000684843	0.0143974
ENSMUSG00000021373	67252	Cap2	10969.2	-0.169915	0.0500375	3.39576	0.000684394	0.0143974
ENSMUSG00000020432	21452	Tcn2	2947.17	0.202204	0.0595597	-3.39498	0.000686346	0.0144084
ENSMUSG00000022220	104110	Adcy4	1328.7	-0.263245	0.0775838	3.39304	0.000691211	0.0144898
ENSMUSG00000005950	94045	P2rx5	817.895	-0.29993	0.0884407	3.39132	0.000695579	0.0145606
ENSMUSG00000026510	209456	Trp53bp2	1434.71	0.22903	0.0675456	-3.39075	0.000697026	0.0145701
ENSMUSG00000039007	54381	Pgcp	2373.16	0.186915	0.0551708	-3.38792	0.000704238	0.0147
ENSMUSG00000053469	21819	Tg	187.135	0.344659	0.101841	-3.38429	0.000713625	0.0148748
ENSMUSG00000020169	382427	Best3	181.246	-0.382219	0.112991	3.38274	0.00071766	0.0149377
ENSMUSG00000036964	56631	Trim17	47.4627	-0.502623	0.14868	3.38056	0.000723379	0.0150354
ENSMUSG00000022099	13829	Epb4.9	469.651	-0.303837	0.0898938	3.37996	0.000724974	0.0150473
ENSMUSG00000051586	100505050	Mical3	3872.27	-0.215073	0.0636797	3.37741	0.000731711	0.0151444
ENSMUSG00000016494	12490	Cd34	7545.71	0.304443	0.0901328	-3.37772	0.000730906	0.0151444
ENSMUSG00000047822	624219	Gm6484	13.7639	-0.398842	0.118123	3.37649	0.000734181	0.0151741
ENSMUSG00000073600	381148	Gm1614	8866.4	-0.177217	0.052523	3.37409	0.0007406	0.0152853
ENSMUSG00000038495	229603	Otud7b	2995.65	-0.184622	0.0547286	3.3734	0.000742447	0.0153019
ENSMUSG00000020032	77976	Nuak1	2760.07	-0.306817	0.0910312	3.37046	0.000750419	0.0154445
ENSMUSG00000005057	23921	Sh2b2	69.8123	-0.50047	0.148601	3.36788	0.000757481	0.0155501
ENSMUSG00000053907	232087	Mat2a	4939.89	0.276042	0.0819647	-3.36782	0.000757662	0.0155501
ENSMUSG00000047867	231931	Gimap6	1078.65	0.300775	0.0893344	-3.36684	0.00076035	0.0155729
ENSMUSG00000069094	18583	Pde7a	1052.88	-0.302742	0.0899241	3.36664	0.000760896	0.0155729
ENSMUSG00000071984	68655	Fndc1	943.861	0.361519	0.1074	-3.36611	0.000762354	0.0155811
ENSMUSG00000020263	216190	Appl2	3982.34	-0.247286	0.0735276	3.36318	0.000770505	0.0157258
ENSMUSG00000024049	17929	Myom1	44484	-0.185437	0.05519	3.35997	0.000779505	0.0158874
ENSMUSG00000070720	623230	Tmem200b	143.977	-0.388435	0.115706	3.35709	0.000787682	0.0160318
ENSMUSG00000022425	18606	Enpp2	1063.91	0.298227	0.0888719	-3.35569	0.000791668	0.016037
ENSMUSG00000029287	21814	Tgfbr3	4118.3	0.153252	0.0456722	-3.35547	0.000792303	0.016037
ENSMUSG00000001497	18511	Pax9	28.6784	0.494295	0.147306	-3.35556	0.000792052	0.016037
ENSMUSG00000052707	233833	Tnrc6a	2300.5	-0.204689	0.060998	3.35567	0.000791723	0.016037
ENSMUSG00000031111	209268	Igsf1	1080.59	-0.299605	0.0893291	3.35395	0.000796664	0.0161031
ENSMUSG00000043602	193043	Zfp3	426.562	-0.285988	0.0852943	3.35296	0.000799531	0.0161389
ENSMUSG00000042406	11911	Atf4	1752.97	0.260991	0.0778824	-3.35109	0.000804928	0.0162255
ENSMUSG00000032011	21838	Thy1	1045.52	0.282338	0.0842892	-3.34963	0.000809196	0.0162892
ENSMUSG00000060703	66205	Cd302	491.565	0.343795	0.102724	-3.34678	0.000817561	0.0164351
ENSMUSG00000042810	77827	Krba1	1124.74	-0.268018	0.0800991	3.34608	0.000819623	0.016454
ENSMUSG00000019820	22288	Utrn	6604.71	-0.206388	0.0616985	3.3451	0.000822516	0.0164896
ENSMUSG00000040596	71592	Pogk	926.521	-0.230007	0.0688093	3.34267	0.000829764	0.0166122
ENSMUSG00000061130	19043	Ppm1b	1598.71	-0.219759	0.065806	3.3395	0.000839291	0.0167346
ENSMUSG00000036333	77480	Kidins220	3316.68	-0.239598	0.0717439	3.33963	0.000838895	0.0167346
ENSMUSG00000029919	54486	Hpgds	94.6083	0.483917	0.144968	-3.33809	0.000843579	0.0167973
ENSMUSG00000039844	107746	Rapgef1	5051.58	-0.221182	0.0662828	3.33694	0.000847071	0.016844
ENSMUSG00000005470	66929	Asf1b	51.6195	0.483391	0.144925	-3.33546	0.000851576	0.0169107
ENSMUSG00000030761	17921	Myo7a	188.669	0.345923	0.103797	-3.33269	0.000860117	0.0169889
ENSMUSG00000072647	280668	Adam1a	117.749	-0.414987	0.124521	3.33268	0.000860135	0.0169889
ENSMUSG00000009739	19009	Pou6f1	763.711	-0.226518	0.0679687	3.33268	0.000860137	0.0169889
ENSMUSG00000059013	27387	Sh2d3c	785.225	0.24079	0.072275	-3.33158	0.000863538	0.0170159
ENSMUSG00000025509	66853	Pnpla2	11245.1	-0.218112	0.0654699	3.33149	0.00086382	0.0170159
ENSMUSG00000028862	53608	Map3k6	465.256	-0.391395	0.117551	3.32957	0.000869799	0.0171107
ENSMUSG00000037536	78938	Fbxo34	355.726	-0.289015	0.0868337	3.32837	0.000873563	0.0171618
ENSMUSG00000020883	72194	Fbxl20	1595.11	-0.206562	0.0620944	3.32658	0.000879199	0.0172494
ENSMUSG00000052374	11472	Actn2	75459.9	-0.229214	0.0689436	3.32465	0.00088528	0.0173225
ENSMUSG00000049090	225791	Zadh2	4001.06	-0.173166	0.0520806	3.32496	0.000884302	0.0173225
ENSMUSG00000022994	11512	Adcy6	12636.1	-0.214313	0.0644689	3.32428	0.000886481	0.0173229
ENSMUSG00000018899	16362	Irf1	1074.11	-0.33257	0.100086	3.32285	0.000891021	0.0173885
ENSMUSG00000023022	65970	Lima1	2719.85	0.236201	0.0711083	-3.3217	0.000894694	0.017437
ENSMUSG00000018593	20692	Sparc	8967.91	0.354362	0.106755	-3.31941	0.000902094	0.017558
ENSMUSG00000008489	15569	Elavl2	18.131	0.43385	0.130763	-3.31784	0.000907167	0.0176334
ENSMUSG00000034071	619331	Zfp551	52.6487	-0.472866	0.142617	3.31564	0.000914338	0.0177493
ENSMUSG00000054545	94284	Ugt1a6a	48.9313	0.48795	0.14727	-3.31329	0.000922037	0.0178751
ENSMUSG00000001020	20198	S100a4	230.876	0.372745	0.112559	-3.31155	0.000927816	0.0179635
ENSMUSG00000078671	244059	Chd2	2309.53	-0.189745	0.0573118	3.31075	0.00093047	0.0179911
ENSMUSG00000056749	18030	Nfil3	294.935	0.340616	0.102964	-3.30812	0.000939247	0.018137
ENSMUSG00000020573	30955	Pik3cg	97.0756	0.469731	0.142086	-3.30595	0.000946541	0.0182538
ENSMUSG00000018363	66313	Smurf2	2202.52	-0.181896	0.0550575	3.30375	0.000954015	0.0183739
ENSMUSG00000032440	21813	Tgfbr2	4052.46	0.241517	0.0731403	-3.30211	0.00095961	0.0184574
ENSMUSG00000061815	435626	Rufy4	169.585	-0.370716	0.112368	3.29913	0.000969835	0.0186297
ENSMUSG00000021559	69635	Dapk1	2429.65	0.173906	0.052732	-3.29792	0.000974046	0.0186425
ENSMUSG00000026349	72949	Ccnt2	1122.25	-0.23103	0.0700548	3.29784	0.000974307	0.0186425
ENSMUSG00000032698	16909	Lmo2	1558.11	-0.197181	0.0597842	3.29821	0.000973029	0.0186425
ENSMUSG00000001128	18636	Cfp	491.31	0.363105	0.110171	-3.29582	0.000981357	0.018753
ENSMUSG00000074622	16658	Mafb	706.207	0.3013	0.0915344	-3.29166	0.000995974	0.0189829
ENSMUSG00000051615	76108	Rap2a	1096.45	0.221188	0.0672334	-3.28985	0.0010024	0.0190806
ENSMUSG00000037762	66859	Slc16a9	205.065	0.38964	0.118487	-3.28847	0.00100733	0.0191002
ENSMUSG00000004609	12489	Cd33	96.2258	0.427348	0.129939	-3.28882	0.00100607	0.0191002
ENSMUSG00000021779	21834	Thrb	1047.41	-0.245131	0.0745358	3.28877	0.00100626	0.0191002
ENSMUSG00000036103	140792	Colec12	2108.04	0.212791	0.0647956	-3.28404	0.0010233	0.0193781
ENSMUSG00000022533	224088	Atp13a3	1459.96	-0.285952	0.0871308	3.28187	0.00103121	0.0194777
ENSMUSG00000037933	76895	Bicd2	4983.45	-0.154083	0.0469472	3.28205	0.00103054	0.0194777
ENSMUSG00000021238	104776	Aldh6a1	4065.69	-0.222528	0.0678145	3.28142	0.00103286	0.0194838
ENSMUSG00000022261	15529	Sdc2	2351.34	0.227419	0.0693549	-3.27906	0.00104152	0.0196049
ENSMUSG00000030411	384569	Nova2	403.412	-0.316856	0.0966334	3.27895	0.00104195	0.0196049
ENSMUSG00000053470	104263	Kdm3a	1128.37	-0.201252	0.0613908	3.27821	0.00104466	0.0196308
ENSMUSG00000028583	14726	Pdpn	681.39	0.333889	0.10188	-3.27728	0.00104811	0.0196705
ENSMUSG00000089945	11641	Gm20459	10650.4	-0.271366	0.0828529	3.27527	0.00105559	0.0197604
ENSMUSG00000038729	11641	Akap2	10650.4	-0.271366	0.0828529	3.27527	0.00105559	0.0197604
ENSMUSG00000045763	70350	Basp1	82.1413	0.463034	0.141421	-3.27416	0.00105976	0.0198132
ENSMUSG00000006800	72043	Sulf2	5835.08	0.280293	0.0856229	-3.27357	0.00106196	0.0198291
ENSMUSG00000060260	101631	Pwwp2b	391.811	-0.29556	0.0903479	3.27135	0.00107035	0.0199604
ENSMUSG00000022439	64099	Parvg	86.475	-0.424327	0.129814	3.26872	0.00108034	0.0200767
ENSMUSG00000074272	26365	Ceacam1	255.218	-0.375452	0.114864	3.26866	0.00108058	0.0200767
ENSMUSG00000022131	58245	Gpr180	886.733	0.22512	0.0688728	-3.26863	0.00108069	0.0200767
ENSMUSG00000027574	58237	Nkain4	637.999	0.390945	0.119666	-3.26698	0.00108703	0.020169
ENSMUSG00000038668	14745	Lpar1	666.819	0.303006	0.092781	-3.26582	0.00109148	0.0202261
ENSMUSG00000020023	319880	Tmcc3	3501.17	0.192728	0.0590521	-3.26369	0.00109972	0.0203531
ENSMUSG00000024883	225870	Rin1	201.355	-0.375268	0.114996	3.26331	0.00110118	0.0203546
ENSMUSG00000090698	381823	Apold1	518.798	0.481201	0.147499	-3.2624	0.00110472	0.0203687
ENSMUSG00000023571	67389	Fam132a	168.252	-0.395055	0.121082	3.2627	0.00110357	0.0203687
ENSMUSG00000053646	235611	Plxnb1	1846.87	0.210735	0.0647873	-3.25272	0.00114307	0.0210494
ENSMUSG00000046434	15382	Hnrnpa1	360.209	-0.291283	0.0896756	3.24818	0.00116145	0.0213611
ENSMUSG00000030235	58807	Slco1c1	74.7763	0.445333	0.137201	-3.24584	0.00117104	0.0215106
ENSMUSG00000041355	66256	Ssr2	1665.62	0.191588	0.0590757	-3.24309	0.00118239	0.0216919
ENSMUSG00000040037	320840	Negr1	169.634	0.373867	0.115297	-3.24264	0.00118426	0.0216991
ENSMUSG00000082361	12223	Btc	48.0646	0.481386	0.148481	-3.24207	0.00118666	0.021716
ENSMUSG00000044469	66443	Tnfaip8l1	99.329	0.469939	0.145191	-3.23669	0.00120926	0.0221021
ENSMUSG00000039891	378431	Txlnb	20346.9	-0.236021	0.0729732	3.23435	0.0012192	0.0222561
ENSMUSG00000028497	66775	Ptplad2	146.653	0.410252	0.12687	-3.23365	0.0012222	0.0222831
ENSMUSG00000048388	241520	Fam171b	76.9557	0.453863	0.14041	-3.23242	0.00122748	0.0223516
ENSMUSG00000039116	215798	Gpr126	614.662	0.249213	0.0771587	-3.22987	0.00123846	0.0225237
ENSMUSG00000046916	68632	Myct1	551.421	-0.324949	0.100728	3.226	0.00125532	0.0227907
ENSMUSG00000031070	211577	Mrgprf	300.086	0.317941	0.0985621	-3.22579	0.00125624	0.0227907
ENSMUSG00000030329	319352	C530028O21Rik	714.741	0.280238	0.0869459	-3.22314	0.00126795	0.0229465
ENSMUSG00000051166	319670	Eml5	429.177	-0.279343	0.0866872	3.22242	0.00127112	0.0229756
ENSMUSG00000021556	105348	Golm1	2128.85	0.188033	0.0583747	-3.22113	0.00127686	0.023051
ENSMUSG00000030357	14228	Fkbp4	7622.01	0.176834	0.0549268	-3.21945	0.00128437	0.0231581
ENSMUSG00000023039	110310	Krt7	374.145	0.420914	0.130762	-3.21894	0.00128665	0.0231707
ENSMUSG00000020886	13385	Dlg4	456.334	0.313788	0.0975146	-3.21785	0.00129153	0.0232189
ENSMUSG00000031381	18700	Piga	138	0.390028	0.121215	-3.21764	0.00129248	0.0232189
ENSMUSG00000036737	108737	Oxsr1	2865.78	-0.198214	0.0616209	3.21668	0.00129685	0.0232689
ENSMUSG00000038156	233744	Spon1	3224.67	0.254573	0.0791568	-3.21606	0.00129964	0.0232904
ENSMUSG00000025586	12877	Cpeb1	586.478	-0.322697	0.100441	3.21281	0.00131445	0.0235272
ENSMUSG00000047485	245683	Klhl34	243.714	-0.452321	0.14082	3.21204	0.00131794	0.023561
ENSMUSG00000000794	140493	Kcnn3	110.719	0.424519	0.13222	-3.21071	0.00132407	0.0236417
ENSMUSG00000016552	239554	Foxred2	111.356	0.410059	0.127749	-3.20987	0.00132793	0.023682
ENSMUSG00000020176	14783	Grb10	2603.45	0.164919	0.0514147	-3.20762	0.00133838	0.0238394
ENSMUSG00000051984	240667	Sec31b	955.855	-0.276849	0.0864303	3.20314	0.00135936	0.0241407
ENSMUSG00000058833	66462	2810428I15Rik	1045.46	0.193264	0.0603285	-3.20353	0.00135755	0.0241407
ENSMUSG00000024085	17158	Man2a1	1357.29	0.197128	0.0615454	-3.20296	0.00136023	0.0241407
ENSMUSG00000022555	13350	Dgat1	553.374	-0.311802	0.0973699	3.20225	0.00136361	0.0241434
ENSMUSG00000074264	11722	Amy1	153.533	-0.453506	0.141627	3.20212	0.00136422	0.0241434
ENSMUSG00000036968	66455	Cnpy4	398.541	0.307641	0.096081	-3.20189	0.0013653	0.0241434
ENSMUSG00000030643	75985	Rab30	203.274	-0.393386	0.122878	3.20144	0.0013674	0.0241514
ENSMUSG00000026864	14828	Hspa5	23486.7	0.194223	0.0607865	-3.19517	0.00139748	0.0246235
ENSMUSG00000031825	78892	Crispld2	5376.45	0.201951	0.0632265	-3.19409	0.0014027	0.0246859
ENSMUSG00000035357	55983	Pdzrn3	4187.15	-0.236165	0.0739789	3.19233	0.00141129	0.0248073
ENSMUSG00000056220	18783	Pla2g4a	507.483	0.309266	0.096899	-3.19163	0.00141471	0.0248376
ENSMUSG00000031880	56437	Rrad	6775.5	-0.429355	0.134636	3.189	0.00142765	0.0250051
ENSMUSG00000015970	218865	Chdh	20.7527	-0.387928	0.121634	3.1893	0.00142616	0.0250051
ENSMUSG00000038145	20623	Snrk	2164.05	0.228497	0.0716618	-3.18855	0.00142989	0.0250146
ENSMUSG00000036225	106931	Kctd1	351.267	0.284386	0.0892301	-3.18711	0.00143704	0.0251098
ENSMUSG00000071714	12984	Csf2rb2	94.0232	0.431717	0.135481	-3.18656	0.00143974	0.025127
ENSMUSG00000028167	69772	Bdh2	101.162	0.404498	0.126983	-3.18546	0.00144524	0.0251931
ENSMUSG00000028530	16451	Jak1	8085.7	-0.156623	0.0491781	3.18481	0.00144848	0.0252196
ENSMUSG00000027015	73649	Cybrd1	1087.97	0.342319	0.107531	-3.18345	0.0014553	0.0252877
ENSMUSG00000070420	666311	Zfp498	354.143	-0.283742	0.0891333	3.18335	0.00145583	0.0252877
ENSMUSG00000032479	17758	Mtap4	13011	-0.160798	0.050522	3.18274	0.00145888	0.0253108
ENSMUSG00000022178	16475	Jub	398.047	-0.338798	0.10657	3.17912	0.00147724	0.0255089
ENSMUSG00000014453	12143	Blk	102.817	-0.459545	0.144537	3.17943	0.00147565	0.0255089
ENSMUSG00000055723	66922	Rras2	1334.4	-0.228831	0.0719873	3.17876	0.00147906	0.0255103
ENSMUSG00000049037	269799	Clec4a1	112.066	0.446344	0.140505	-3.17672	0.00148953	0.0256607
ENSMUSG00000031963	73230	Bmper	113.169	0.401871	0.126602	-3.17427	0.00150212	0.0258474
ENSMUSG00000054520	24055	Sh3bp2	172.877	0.360728	0.113666	-3.17357	0.00150578	0.02588
ENSMUSG00000047036	235682	Zfp445	3468.74	-0.296781	0.0936208	3.17003	0.00152422	0.0261664
ENSMUSG00000022043	66854	Trim35	4375.58	-0.195742	0.0617554	3.16963	0.00152633	0.0261719
ENSMUSG00000001403	68612	Ube2c	28.6963	0.462357	0.145981	-3.16725	0.00153887	0.0263256
ENSMUSG00000079037	19122	Prnp	3845.22	-0.16616	0.0524611	3.16731	0.00153858	0.0263256
ENSMUSG00000032180	17083	Tmed1	818.041	0.210415	0.0664581	-3.16613	0.00154479	0.0263656
ENSMUSG00000037411	18787	Serpine1	1215.65	0.468325	0.148043	-3.16343	0.00155919	0.0265805
ENSMUSG00000037902	19261	Sirpa	1751.94	0.264774	0.0837275	-3.16233	0.00156513	0.0266507
ENSMUSG00000041954	21936	Tnfrsf18	42.711	-0.471783	0.14921	3.16187	0.00156757	0.0266614
ENSMUSG00000026600	20652	Soat1	616.022	0.26741	0.0846108	-3.16047	0.00157517	0.0267596
ENSMUSG00000031813	73711	Fam125a	526.548	0.241862	0.0766091	-3.1571	0.00159349	0.0270396
ENSMUSG00000030469	210105	Zfp719	269.178	-0.295637	0.0937261	3.15426	0.00160903	0.0272718
ENSMUSG00000005410	17218	Mcm5	193.849	0.419809	0.133143	-3.15307	0.00161564	0.0273523
ENSMUSG00000019362	101966	D8Ertd738e	2265.39	0.187798	0.0595982	-3.15106	0.00162676	0.0274774
ENSMUSG00000089736	100044509	Gm14378	66.5186	-0.44578	0.141486	3.1507	0.00162879	0.02748
ENSMUSG00000015377	69440	Fam116b	435.264	-0.295765	0.093885	3.15029	0.00163108	0.0274871
ENSMUSG00000037519	233977	Ppfia1	1296.36	-0.202925	0.0644447	3.14883	0.00163925	0.0275931
ENSMUSG00000025887	12364	Casp12	398.336	0.305779	0.0972035	-3.14576	0.00165654	0.0278204
ENSMUSG00000042807	329152	Hecw2	347.114	-0.351313	0.11169	3.14542	0.00165849	0.0278213
ENSMUSG00000026987	407823	Baz2b	1780.31	-0.204505	0.0650646	3.14311	0.00167163	0.0279907
ENSMUSG00000029142	66845	Mrpl33	1271.29	0.208819	0.0664397	-3.14298	0.00167239	0.0279907
ENSMUSG00000027894	229706	Slc6a17	677.603	-0.237506	0.0755887	3.14208	0.0016775	0.0280442
ENSMUSG00000046532	11835	Ar	254.978	0.314672	0.100172	-3.14132	0.00168188	0.0280855
ENSMUSG00000038763	116904	Alpk3	6385.07	-0.272506	0.0867694	3.14058	0.00168616	0.028125
ENSMUSG00000022887	17174	Masp1	631.879	-0.279316	0.0890058	3.13817	0.00170004	0.0282987
ENSMUSG00000055782	26874	Abcd2	268.459	-0.375091	0.119528	3.13811	0.00170042	0.0282987
ENSMUSG00000042548	228790	Asxl1	1832.12	-0.195329	0.0622771	3.13644	0.0017101	0.0284194
ENSMUSG00000040102	232539	Klhdc5	312.334	-0.311208	0.099231	3.1362	0.00171155	0.0284194
ENSMUSG00000031698	213435	Mylk3	32568.8	-0.163754	0.0522756	3.13252	0.00173311	0.0287126
ENSMUSG00000047407	21815	Tgif1	298.609	-0.324805	0.10368	3.13277	0.00173164	0.0287126
ENSMUSG00000067158	12829	Col4a4	946.567	0.290024	0.0926176	-3.13142	0.00173965	0.0287885
ENSMUSG00000048332	108927	Lhfp	2910.91	0.168862	0.0539361	-3.13077	0.00174349	0.0288196
ENSMUSG00000030731	20981	Syt3	142.948	0.375006	0.119796	-3.13036	0.0017459	0.028827
ENSMUSG00000018076	76199	Med13l	2029.92	-0.185587	0.0593131	3.12894	0.00175436	0.0288969
ENSMUSG00000038370	66425	Pcp4l1	11605.7	0.170951	0.0546384	-3.12878	0.00175535	0.0288969
ENSMUSG00000071540	100504518	3425401B19Rik	2241.66	-0.214892	0.06875	3.1257	0.0017738	0.0291566
ENSMUSG00000056124	56386	B4galt6	1534.26	-0.196618	0.0629197	3.1249	0.00177864	0.0292035
ENSMUSG00000058690	72972	Gcap14	6086.33	-0.220498	0.070623	3.12219	0.00179511	0.0294409
ENSMUSG00000022529	74120	Zfp263	583.599	-0.221294	0.0708885	3.12172	0.00179799	0.0294554
ENSMUSG00000022358	67731	Fbxo32	6235.75	-0.26243	0.0841256	3.1195	0.00181156	0.0295788
ENSMUSG00000039377	15284	Hlx	201.235	0.325403	0.104299	-3.11991	0.00180909	0.0295788
ENSMUSG00000058571	23888	Gpc6	1299.79	0.209959	0.0673014	-3.11969	0.00181044	0.0295788
ENSMUSG00000036863	214804	Syde2	2406.84	-0.234159	0.0751337	3.11657	0.00182971	0.0297758
ENSMUSG00000031093	75974	Dock11	303.223	0.365724	0.117343	-3.1167	0.00182891	0.0297758
ENSMUSG00000058672	22151	Tubb2a	842.127	0.27334	0.0877028	-3.11666	0.00182915	0.0297758
ENSMUSG00000037410	67016	Tbc1d2b	1367.01	0.227628	0.0731774	-3.11063	0.00186687	0.0303469
ENSMUSG00000028906	269587	Epb4.1	7642.19	-0.223433	0.0718613	3.10923	0.00187579	0.0304582
ENSMUSG00000051435	329977	Fhad1	72.7264	-0.448483	0.144415	3.10552	0.00189943	0.0308081
ENSMUSG00000054675	231633	Tmem119	1445.88	0.342237	0.110222	-3.10498	0.00190292	0.0308306
ENSMUSG00000035745	170483	Grin3b	122.073	-0.40026	0.129037	3.10191	0.00192279	0.0309659
ENSMUSG00000069515	17110	Lyz1	31.8269	0.45345	0.146171	-3.10219	0.00192092	0.0309659
ENSMUSG00000020034	216198	Tcp11l2	3041.58	-0.236119	0.0760951	3.10295	0.00191602	0.0309659
ENSMUSG00000022018	66214	1190002H23Rik	131.679	0.415562	0.133977	-3.10173	0.00192391	0.0309659
ENSMUSG00000038648	208647	Creb3l2	6047.8	-0.238824	0.0769926	3.10191	0.00192274	0.0309659
ENSMUSG00000043456	243937	Zfp536	288.518	-0.350366	0.112928	3.10257	0.00191851	0.0309659
ENSMUSG00000052056	228913	Zfp217	690.992	-0.262303	0.0846191	3.09981	0.00193645	0.0311099
ENSMUSG00000038147	12523	Cd84	78.6348	0.416	0.134206	-3.09971	0.00193709	0.0311099
ENSMUSG00000037656	20516	Slc20a2	10631.4	-0.143015	0.0461473	3.09911	0.00194104	0.0311393
ENSMUSG00000020859	70834	Spag9	6663.24	-0.21665	0.0699466	3.09737	0.00195247	0.0312885
ENSMUSG00000022377	13196	Asap1	1109.81	0.225357	0.0727675	-3.09695	0.00195523	0.0312986
ENSMUSG00000027469	72119	Tpx2	49.8553	0.456065	0.1473	-3.09616	0.00196047	0.0313142
ENSMUSG00000019838	72472	Slc16a10	1064.88	0.202229	0.0653106	-3.09642	0.00195876	0.0313142
ENSMUSG00000034135	70661	Sik3	3421.02	-0.198862	0.0642578	3.09475	0.00196979	0.031429
ENSMUSG00000008730	15257	Hipk1	5023.01	-0.157755	0.0509891	3.09389	0.00197547	0.0314751
ENSMUSG00000025612	12013	Bach1	1090.33	-0.189487	0.0612566	3.09334	0.00197918	0.0314763
ENSMUSG00000020774	11484	Aspa	191.224	0.377639	0.122136	-3.09195	0.00198845	0.0315554
ENSMUSG00000000290	16414	Itgb2	268.574	0.343285	0.111117	-3.08941	0.00200552	0.0316956
ENSMUSG00000032311	83961	Nrg4	67.5503	-0.437238	0.141526	3.08946	0.00200521	0.0316956
ENSMUSG00000003452	12121	Bicd1	184.188	-0.348265	0.112718	3.0897	0.00200362	0.0316956
ENSMUSG00000026656	14130	Fcgr2b	233.49	0.366187	0.118532	-3.08936	0.00200591	0.0316956
ENSMUSG00000039640	56282	Mrpl12	1349.53	0.210458	0.0682146	-3.08523	0.00203393	0.0320995
ENSMUSG00000033377	114301	Palmd	3533.16	-0.268598	0.0870687	3.0849	0.0020362	0.0320995
ENSMUSG00000043099	15248	Hic1	967.083	-0.295059	0.0956544	3.08463	0.00203803	0.0320995
ENSMUSG00000026384	19258	Ptpn4	362.496	-0.308347	0.100036	3.08236	0.00205367	0.0323112
ENSMUSG00000022283	18458	Pabpc1	3526.38	0.247144	0.0802015	-3.08154	0.00205932	0.0323309
ENSMUSG00000074577	69553	Fam65c	91.2906	0.397974	0.129136	-3.08183	0.00205735	0.0323309
ENSMUSG00000030986	101437	Dhx32	1079.55	-0.189616	0.0615535	3.08051	0.00206649	0.0324088
ENSMUSG00000040488	108075	Ltbp4	33729.4	0.25923	0.0841887	-3.07916	0.00207588	0.0325215
ENSMUSG00000069520	67226	Tmem19	667.022	0.224784	0.0730322	-3.07788	0.00208478	0.032626
ENSMUSG00000040631	114255	Dok4	584.617	-0.277974	0.0903339	3.07719	0.00208963	0.0326672
ENSMUSG00000022587	17069	Ly6e	4974.39	0.274619	0.0892735	-3.07615	0.00209693	0.0327464
ENSMUSG00000048731	70772	Ggnbp1	395.39	-0.312994	0.101796	3.07472	0.00210701	0.032869
ENSMUSG00000021453	23882	Gadd45g	688.037	0.419744	0.136631	-3.0721	0.00212557	0.0331232
ENSMUSG00000021614	13003	Vcan	1935.56	0.348882	0.113637	-3.07014	0.00213957	0.0333061
ENSMUSG00000029073	79554	Gltpd1	244.686	0.293629	0.0956514	-3.06979	0.00214213	0.0333106
ENSMUSG00000005413	15368	Hmox1	576.37	0.347278	0.11314	-3.06944	0.0021446	0.0333139
ENSMUSG00000053886	72281	Sh2d4a	137.356	0.370744	0.120826	-3.0684	0.00215206	0.0333944
ENSMUSG00000060594	244864	Layn	248.842	0.303024	0.0989262	-3.06313	0.00219032	0.0339523
ENSMUSG00000058099	74039	Nfam1	141.33	0.394526	0.12896	-3.05929	0.00221863	0.0342926
ENSMUSG00000038335	104662	Tsr1	701.843	-0.201621	0.0659131	3.05889	0.00222161	0.0342926
ENSMUSG00000015133	233328	Lrrk1	1000.65	0.248279	0.0811656	-3.05892	0.00222137	0.0342926
ENSMUSG00000030087	66277	Klf15	2084.4	-0.235388	0.0769471	3.05909	0.0022201	0.0342926
ENSMUSG00000001379	225372	Apbb3	407.768	-0.243514	0.0796236	3.05832	0.00222584	0.0343219
ENSMUSG00000014498	237615	Ankrd52	1858.36	-0.197758	0.0647444	3.05444	0.0022548	0.0346955
ENSMUSG00000074743	21824	Thbd	3350.55	-0.221929	0.0726842	3.05334	0.00226312	0.0347843
ENSMUSG00000034858	235493	BC031353	1197.23	-0.263865	0.0864269	3.05305	0.0022653	0.0347843
ENSMUSG00000031442	17207	Mcf2l	884.462	-0.32254	0.105671	3.05229	0.00227105	0.0348362
ENSMUSG00000070327	672511	Rnf213	2527.18	0.196851	0.0645431	-3.04991	0.00228908	0.0350762
ENSMUSG00000029195	83379	Klb	19.3014	-0.340702	0.111726	3.04945	0.00229258	0.0350932
ENSMUSG00000034613	319468	Ppm1h	266.208	0.282238	0.0925662	-3.04904	0.00229577	0.0351054
ENSMUSG00000042700	217692	Sipa1l1	1154.76	-0.201512	0.066112	3.04804	0.00230338	0.0351852
ENSMUSG00000041801	27280	Phlda3	463.495	-0.336304	0.110349	3.04765	0.00230638	0.0351944
ENSMUSG00000014633	66531	2310061C15Rik	797.88	0.195949	0.0643103	-3.04692	0.00231198	0.0352433
ENSMUSG00000019189	74315	Rnf145	981.943	0.234927	0.0771198	-3.04626	0.00231711	0.0352848
ENSMUSG00000024423	16210	Impact	1307.67	-0.307715	0.101081	3.04423	0.00233275	0.0354864
ENSMUSG00000022667	57781	Cd200r1	22.3203	0.45083	0.14818	-3.04246	0.00234656	0.0356595
ENSMUSG00000030101	58911	Sumf1	879.755	0.19607	0.0645226	-3.03878	0.00237534	0.0360596
ENSMUSG00000085795	353310	Zfp703	2092.35	-0.270253	0.0889722	3.0375	0.00238548	0.0361387
ENSMUSG00000028378	67103	Ptgr1	282.285	0.322729	0.106305	-3.03588	0.00239832	0.0362959
ENSMUSG00000060212	270109	Pcnxl2	118.457	-0.396067	0.130505	3.03488	0.00240635	0.0363799
ENSMUSG00000049323	237782	Smcr8	1265.17	-0.177228	0.0584309	3.03312	0.00242036	0.0365541
ENSMUSG00000089774	53881	Slc5a3	1326.2	-0.281743	0.0929048	3.0326	0.00242455	0.0365799
ENSMUSG00000063904	75221	Dpp3	873.359	0.231148	0.0762864	-3.03	0.00244553	0.0368585
ENSMUSG00000026822	16819	Lcn2	46.7783	-0.448284	0.147999	3.02898	0.00245384	0.0369458
ENSMUSG00000021255	26380	Esrrb	753.648	-0.22881	0.0755904	3.02697	0.00247021	0.0371543
ENSMUSG00000002985	11816	Apoe	35253.2	0.260617	0.0862257	-3.0225	0.00250695	0.0376298
ENSMUSG00000052085	76088	Dock8	622.428	0.271402	0.0898482	-3.02067	0.00252216	0.0378195
ENSMUSG00000031986	244666	Gm505	312.161	-0.296014	0.0980221	3.01987	0.00252886	0.0378813
ENSMUSG00000041939	17855	Mvk	248.801	0.30115	0.0998156	-3.01706	0.0025524	0.038195
ENSMUSG00000044676	234725	Zfp612	871.99	-0.220334	0.073046	3.01638	0.00255811	0.0382416
ENSMUSG00000020937	72469	Plcd3	1395.23	-0.312908	0.103837	3.01345	0.00258297	0.0385739
ENSMUSG00000044835	73844	Ankrd45	19.6218	-0.445128	0.147745	3.01281	0.00258838	0.0386154
ENSMUSG00000030495	53896	Slc7a10	27.1442	-0.37632	0.124943	3.01194	0.00259584	0.0386875
ENSMUSG00000066406	75547	Akap13	6544.03	-0.211511	0.0702527	3.01072	0.00260631	0.0388042
ENSMUSG00000056608	109151	Chd9	1307.6	-0.183395	0.0609381	3.00953	0.00261649	0.0389163
ENSMUSG00000031661	93960	Nkd1	214.265	0.31541	0.104845	-3.00835	0.00262669	0.0390094
ENSMUSG00000033763	244654	Mtss1l	2118.86	-0.226764	0.0753821	3.00819	0.00262806	0.0390094
ENSMUSG00000050310	78757	Rictor	981.001	-0.221976	0.0738005	3.00779	0.00263159	0.0390224
ENSMUSG00000031835	56453	Mbtps1	3521.36	0.159329	0.0529989	-3.00626	0.0026448	0.0391787
ENSMUSG00000020770	217331	Unk	664.114	-0.219258	0.0729708	3.00473	0.00265813	0.0393366
ENSMUSG00000058290	105988	Espl1	65.6692	0.438658	0.146048	-3.00353	0.0026687	0.0394533
ENSMUSG00000057337	53374	Chst3	59.834	-0.445939	0.148507	3.00281	0.00267501	0.0394672
ENSMUSG00000027276	16449	Jag1	961.912	-0.211262	0.070353	3.00289	0.00267431	0.0394672
ENSMUSG00000059263	74996	Usp47	6478.69	-0.188951	0.0629324	3.00245	0.00267818	0.0394742
ENSMUSG00000024232	68010	Bambi	882.274	0.270873	0.090245	-3.00153	0.00268629	0.0395541
ENSMUSG00000021670	15357	Hmgcr	412.379	0.270535	0.0902637	-2.99716	0.00272507	0.0400851
ENSMUSG00000024163	30957	Mapk8ip3	4228.31	-0.147938	0.0493821	2.99578	0.00273742	0.0402264
ENSMUSG00000054519	237775	Zfp867	181.501	-0.355119	0.118593	2.99444	0.00274949	0.0403231
ENSMUSG00000000538	216810	Tom1l2	7486.89	-0.203802	0.0680547	2.99468	0.00274737	0.0403231
ENSMUSG00000005220	53419	Corin	15363.4	-0.143642	0.0479913	2.99309	0.0027617	0.0404618
ENSMUSG00000034614	216505	Pik3ip1	1597.42	-0.305299	0.102058	2.99143	0.00277676	0.0406419
ENSMUSG00000032640	269941	Chsy1	717.108	0.239567	0.0801001	-2.99085	0.00278201	0.0406783
ENSMUSG00000039354	54380	Smarcal1	2171.64	-0.169257	0.0566113	2.98982	0.00279146	0.0407758
ENSMUSG00000028268	55932	Gbp3	291.503	0.337631	0.112946	-2.98931	0.00279609	0.0407868
ENSMUSG00000036533	260409	Cdc42ep3	1881.48	-0.181039	0.0605658	2.98913	0.00279776	0.0407868
ENSMUSG00000092005	667277	C1rb	141.053	0.357079	0.119473	-2.98878	0.00280092	0.0407924
ENSMUSG00000053390	240067	Zfp952	265.115	-0.331673	0.111034	2.98713	0.00281612	0.0409326
ENSMUSG00000004945	70544	5730437N04Rik	2743.03	0.16091	0.0538864	-2.98609	0.00282566	0.0410308
ENSMUSG00000041075	14369	Fzd7	1504.28	-0.2115	0.0708466	2.98532	0.00283283	0.0410942
ENSMUSG00000054863	106014	Fam19a5	262.396	-0.283206	0.0951071	2.97775	0.00290368	0.042039
ENSMUSG00000031591	11886	Asah1	1307.89	0.201944	0.0678307	-2.97718	0.00290915	0.0420767
ENSMUSG00000031342	14758	Gpm6b	1650.87	0.228107	0.0766496	-2.97598	0.00292059	0.0422006
ENSMUSG00000022661	17470	Cd200	1962.27	0.17106	0.0575318	-2.97331	0.00294608	0.0424855
ENSMUSG00000024677	69774	Ms4a6b	101.173	0.405805	0.136557	-2.9717	0.00296155	0.0426667
ENSMUSG00000022961	20658	Son	12804.6	-0.162001	0.0545242	2.97117	0.00296667	0.0426985
ENSMUSG00000051159	12705	Cited1	70.4432	0.403383	0.135855	-2.96922	0.00298554	0.042928
ENSMUSG00000049470	93736	Aff4	3651.2	-0.197948	0.0666888	2.96823	0.00299523	0.0430253
ENSMUSG00000050105	72690	Grrp1	98.6566	-0.393182	0.132567	2.96592	0.00301783	0.0433077
ENSMUSG00000047379	108902	B3gnt1	1966.92	0.163297	0.0550812	-2.96467	0.00303009	0.0434412
ENSMUSG00000045382	12767	Cxcr4	365.652	0.304535	0.102797	-2.96248	0.00305172	0.043666
ENSMUSG00000024935	20510	Slc1a1	133.359	-0.382328	0.129056	2.96249	0.00305161	0.043666
ENSMUSG00000022987	239652	Zfp641	390.471	-0.273243	0.0922627	2.96157	0.00306074	0.04371
ENSMUSG00000026425	14270	Srgap2	1500.63	0.176338	0.0595392	-2.96172	0.00305929	0.04371
ENSMUSG00000031808	26457	Slc27a1	5405.81	-0.232614	0.0785907	2.95982	0.00307823	0.0438744
ENSMUSG00000028164	110173	Manba	747.421	0.202131	0.068285	-2.9601	0.00307537	0.0438744
ENSMUSG00000020826	18126	Nos2	318.034	0.370642	0.125294	-2.95818	0.00309458	0.0440648
ENSMUSG00000046275	237858	Tusc5	125.245	-0.387728	0.131175	2.9558	0.00311857	0.044235
ENSMUSG00000044068	22183	Zrsr1	1444.91	-0.234463	0.0793106	2.95626	0.0031139	0.044235
ENSMUSG00000026447	240752	Pik3c2b	1479.25	-0.160857	0.0544125	2.95626	0.00311397	0.044235
ENSMUSG00000017493	16010	Igfbp4	15063.1	0.250012	0.0845818	-2.95586	0.00311801	0.044235
ENSMUSG00000032555	235559	Topbp1	667.032	0.204017	0.0690441	-2.95488	0.00312793	0.0443248
ENSMUSG00000023845	240028	Lnpep	2939.2	-0.233459	0.0790209	2.95439	0.00313286	0.044352
ENSMUSG00000052534	18514	Pbx1	4065.06	-0.173242	0.0586598	2.95333	0.00314365	0.0444619
ENSMUSG00000038305	67198	Spats2l	712.368	0.224444	0.0760057	-2.953	0.00314705	0.0444671
ENSMUSG00000034653	240255	Ythdc2	486.134	-0.246675	0.083561	2.95203	0.0031569	0.0445636
ENSMUSG00000021221	70127	Dpf3	415.04	0.252917	0.0857792	-2.94846	0.00319358	0.045038
ENSMUSG00000058655	75705	Eif4b	9421.93	-0.165773	0.0562382	2.9477	0.00320152	0.0451068
ENSMUSG00000053819	108058	Camk2d	6219.77	-0.195688	0.0664237	2.94605	0.00321859	0.0453038
ENSMUSG00000070583	14349	Fv1	206.813	-0.296715	0.100737	2.94543	0.0032251	0.045352
ENSMUSG00000056529	19204	Ptafr	87.4163	0.414479	0.140784	-2.94408	0.00323916	0.0455062
ENSMUSG00000005338	94332	Cadm3	280.922	0.365159	0.124231	-2.93934	0.00328909	0.0460316
ENSMUSG00000047821	94092	Trim16	235.433	-0.334227	0.113677	2.94015	0.00328051	0.0460316
ENSMUSG00000024661	14319	Fth1	31034.3	0.147805	0.0502826	-2.93949	0.00328755	0.0460316
ENSMUSG00000024598	14119	Fbn2	35.0214	0.438944	0.149332	-2.93939	0.00328861	0.0460316
ENSMUSG00000027022	241431	Xirp2	16138	-0.242234	0.0824219	2.93896	0.00329321	0.0460454
ENSMUSG00000007817	328365	Zmiz1	5368.69	-0.204194	0.0694935	2.93833	0.00329991	0.0460952
ENSMUSG00000044317	319197	Gpr4	467.257	-0.23831	0.0811739	2.93579	0.00332695	0.0464288
ENSMUSG00000022265	11732	Ank	5517.46	-0.152809	0.0520586	2.93533	0.0033319	0.0464538
ENSMUSG00000025220	76055	Mgea5	3834.58	-0.203322	0.0693829	2.93044	0.00338483	0.0469245
ENSMUSG00000031659	11513	Adcy7	1071.73	0.263196	0.0898037	-2.9308	0.00338095	0.0469245
ENSMUSG00000018167	59045	Stard3	1347.78	0.18823	0.0642319	-2.93047	0.00338447	0.0469245
ENSMUSG00000000278	74617	Scpep1	1174.14	0.246464	0.0840929	-2.93085	0.00338035	0.0469245
ENSMUSG00000031508	102334	Ankrd10	1020.72	-0.232254	0.079242	2.93094	0.00337934	0.0469245
ENSMUSG00000021408	19766	Ripk1	543.692	0.230007	0.0784818	-2.9307	0.00338198	0.0469245
ENSMUSG00000038172	69863	Ttc39b	1591.19	-0.244388	0.0835095	2.92647	0.00342834	0.047483
ENSMUSG00000060002	212862	Chpt1	7174.16	-0.21401	0.0731384	2.9261	0.00343243	0.0474948
ENSMUSG00000034412	103724	Tbc1d10a	448.954	0.269399	0.0920881	-2.92545	0.00343961	0.0475047
ENSMUSG00000023034	15370	Nr4a1	6149.14	0.358764	0.122629	-2.92561	0.00343786	0.0475047
ENSMUSG00000020681	11421	Ace	3034.15	0.282576	0.0966178	-2.92468	0.00344809	0.0475772
ENSMUSG00000030823	78921	9130019O22Rik	91.811	-0.387775	0.132612	2.92414	0.00345411	0.047595
ENSMUSG00000050064	242109	Zfp697	222.335	-0.307964	0.105331	2.92378	0.00345811	0.047595
ENSMUSG00000041515	15900	Irf8	237.381	0.330795	0.113143	-2.92369	0.0034591	0.047595
ENSMUSG00000021190	19141	Lgmn	4377.66	0.243843	0.0834809	-2.92094	0.00348979	0.0479723
ENSMUSG00000027641	19650	Rbl1	140.542	0.34755	0.119094	-2.91828	0.00351969	0.048248
ENSMUSG00000022203	13644	Efs	354.959	0.369336	0.126548	-2.91854	0.00351676	0.048248
ENSMUSG00000037544	218977	Dlgap5	11.3077	0.351713	0.120504	-2.91869	0.00351501	0.048248
ENSMUSG00000024646	109672	Cyb5	1897.95	0.189537	0.0650654	-2.91302	0.00357946	0.0490216
ENSMUSG00000033530	104718	Ttc7b	1497.53	-0.199007	0.0683417	2.91195	0.00359185	0.0490997
ENSMUSG00000070803	56222	Cited4	1191.47	0.282152	0.0968872	-2.91217	0.00358932	0.0490997
ENSMUSG00000028517	67916	Ppap2b	6842.28	0.21568	0.0741025	-2.91056	0.00360787	0.0492729
ENSMUSG00000017291	216965	Taok1	2661.58	-0.224375	0.0771592	2.90794	0.00363812	0.0496346
ENSMUSG00000001228	18140	Uhrf1	37.1869	0.422832	0.145418	-2.90769	0.00364111	0.0496346
ENSMUSG00000030008	73327	1700040I03Rik	274.643	0.258549	0.0889445	-2.90686	0.00365077	0.0497202
ENSMUSG00000034295	225288	Fhod3	10892.6	-0.151977	0.0523132	2.90514	0.00367088	0.0499477
ENSMUSG00000028412	100434	Slc44a1	1952.41	0.173404	0.0597024	-2.90447	0.00367871	0.0499618
ENSMUSG00000020601	217410	Trib2	777.29	-0.263146	0.0905929	2.90471	0.00367589	0.0499618
ENSMUSG00000071645	70044	Tut1	579.952	-0.248558	0.0856536	2.90189	0.00370913	0.0503284
ENSMUSG00000051510	17134	Mafg	676.976	-0.21526	0.0741985	2.90114	0.0037181	0.0504036
ENSMUSG00000061315	17938	Naca	18705.5	-0.164035	0.0565591	2.90024	0.00372879	0.0505019
ENSMUSG00000034353	51801	Ramp1	558.32	-0.316956	0.109318	2.89939	0.00373887	0.0505918
ENSMUSG00000007122	12372	Casq1	2565.93	-0.308485	0.106422	2.8987	0.00374711	0.0506566
ENSMUSG00000034160	108155	Ogt	4524.2	-0.220589	0.0761332	2.8974	0.00376266	0.0508201
ENSMUSG00000030652	12850	Coq7	1561.83	0.195548	0.0675248	-2.89594	0.00378026	0.051011
ENSMUSG00000026131	13518	Dst	24486.3	-0.212083	0.0732571	2.89505	0.00379096	0.0511084
ENSMUSG00000036264	320027	Fstl4	190.959	-0.321882	0.111196	2.89473	0.00379486	0.0511141
ENSMUSG00000038888	233189	Ctu1	150.637	-0.377957	0.130661	2.89266	0.00381995	0.0514049
ENSMUSG00000028197	71355	Col24a1	13.9696	0.403858	0.139633	-2.89227	0.00382463	0.0514208
ENSMUSG00000032531	56332	Amotl2	3376.09	0.244151	0.0844977	-2.88944	0.00385928	0.0518392
ENSMUSG00000021913	239017	Ogdhl	384.53	-0.431383	0.149318	2.88902	0.00386441	0.0518607
ENSMUSG00000002835	27221	Chaf1a	87.903	0.390755	0.135286	-2.88836	0.00387253	0.0519223
ENSMUSG00000030203	70686	Dusp16	1324.17	-0.243226	0.0842252	2.8878	0.00387942	0.0519673
ENSMUSG00000028044	54124	Cks1b	161.475	0.31754	0.110014	-2.88637	0.00389719	0.0521578
ENSMUSG00000040253	229900	Gbp7	745.529	0.27115	0.0940627	-2.88266	0.00394339	0.052728
ENSMUSG00000000693	16950	Loxl3	324.704	0.283915	0.0985043	-2.88226	0.0039484	0.052747
ENSMUSG00000064294	71724	Aox3	392.615	0.359884	0.124887	-2.88167	0.0039558	0.0527978
ENSMUSG00000026407	12292	Cacna1s	223.594	-0.360848	0.125298	2.87992	0.00397773	0.0530424
ENSMUSG00000029061	26561	Mmp23	464.764	0.243321	0.0845009	-2.87951	0.00398296	0.0530639
ENSMUSG00000030225	232449	Dera	142.376	0.334827	0.116349	-2.87778	0.00400485	0.0531149
ENSMUSG00000028396	71886	2310002L09Rik	832.827	-0.305114	0.105986	2.87882	0.00399172	0.0531149
ENSMUSG00000029291	52822	Rufy3	393.072	-0.274771	0.0954786	2.87783	0.00400419	0.0531149
ENSMUSG00000038777	20360	Sema6c	1229.55	0.312309	0.108497	-2.8785	0.00399573	0.0531149
ENSMUSG00000004642	20492	Slbp	329.021	0.260402	0.0905587	-2.87551	0.00403376	0.0533059
ENSMUSG00000043518	24004	Rai2	1093.29	-0.188234	0.0654524	2.87589	0.00402886	0.0533059
ENSMUSG00000000823	269401	Znf512b	1162.44	-0.183352	0.06376	2.87565	0.00403194	0.0533059
ENSMUSG00000007279	56788	Scube2	78.1627	-0.38487	0.133824	2.87595	0.00402818	0.0533059
ENSMUSG00000022305	239393	Lrp12	270.206	0.280356	0.097534	-2.87444	0.00404744	0.0534385
ENSMUSG00000028532	320508	Cachd1	301.495	0.303503	0.10563	-2.87327	0.00406251	0.0535894
ENSMUSG00000006611	15216	Hfe	552.27	0.231016	0.0804328	-2.87216	0.00407679	0.0537295
ENSMUSG00000005893	22026	Nr2c2	949.562	-0.189052	0.0659134	2.86819	0.00412824	0.0543589
ENSMUSG00000046785	77781	Epm2aip1	2480.36	-0.25169	0.0877794	2.8673	0.00413991	0.054415
ENSMUSG00000028064	20351	Sema4a	312.477	0.328526	0.114568	-2.86752	0.00413701	0.054415
ENSMUSG00000040151	23908	Hs2st1	552.127	0.241708	0.0843187	-2.8666	0.00414904	0.0544863
ENSMUSG00000040711	268396	Sh3pxd2b	1498.16	0.328512	0.114652	-2.8653	0.00416608	0.0545857
ENSMUSG00000047419	76469	Cmya5	51389.4	-0.233534	0.0815154	2.8649	0.00417136	0.0545857
ENSMUSG00000024924	22359	Vldlr	10844.2	-0.239442	0.0835897	2.86449	0.00417678	0.0546066
ENSMUSG00000040552	12267	C3ar1	214.124	0.325308	0.113603	-2.86356	0.00418914	0.054631
ENSMUSG00000004814	56221	Ccl24	169.619	0.382527	0.133571	-2.86384	0.00418538	0.054631
ENSMUSG00000036655	71693	Colec11	307.657	0.278064	0.0971062	-2.86351	0.0041898	0.054631
ENSMUSG00000024381	30948	Bin1	474.455	0.265538	0.0927628	-2.86255	0.00420241	0.0547468
ENSMUSG00000030921	20128	Trim30a	280.628	0.291856	0.101968	-2.86224	0.00420664	0.0547533
ENSMUSG00000027177	15259	Hipk3	8749.73	-0.209865	0.0733353	2.86172	0.00421352	0.0547944
ENSMUSG00000028088	14263	Fmo5	1189.6	-0.198736	0.0694561	2.86132	0.00421879	0.0548144
ENSMUSG00000002111	20375	Sfpi1	142.832	0.363987	0.127239	-2.86066	0.00422762	0.0548385
ENSMUSG00000009995	66826	Taz	1857.61	-0.153754	0.0537484	2.86062	0.00422811	0.0548385
ENSMUSG00000061461	66278	1810013D10Rik	1315.44	0.192154	0.0671917	-2.85979	0.00423915	0.0549303
ENSMUSG00000026617	23827	Bpnt1	553.26	0.21095	0.0737707	-2.85953	0.00424266	0.0549303
ENSMUSG00000078453	73112	3110003A17Rik	336.384	0.259004	0.0906175	-2.85821	0.0042604	0.0551115
ENSMUSG00000030747	67800	Dgat2	2435.7	-0.310525	0.108742	2.85562	0.00429524	0.0554157
ENSMUSG00000026977	57438	March7	924.579	-0.277679	0.0972216	2.85614	0.00428821	0.0554157
ENSMUSG00000025488	12869	Cox8b	6992.77	0.170447	0.0596883	-2.85563	0.00429521	0.0554157
ENSMUSG00000036087	75991	Slain2	4915.58	-0.218704	0.0766498	2.85328	0.00432699	0.0557765
ENSMUSG00000022744	224250	Cldn25	1639.41	-0.177433	0.0622399	2.8508	0.004361	0.0561656
ENSMUSG00000014164	100503085	Klhl3	97.3042	-0.386707	0.135748	2.84872	0.00438959	0.0564843
ENSMUSG00000025060	20874	Slk	4456.6	-0.17914	0.0629041	2.84783	0.00440188	0.0565928
ENSMUSG00000062760	72301	1810041L15Rik	251.302	0.28719	0.1009	-2.84627	0.00442343	0.0568202
ENSMUSG00000022876	67742	Samsn1	13.3143	0.379944	0.133532	-2.84534	0.00443636	0.0569366
ENSMUSG00000020674	69675	Pxdn	3923.92	0.247613	0.0870466	-2.84461	0.00444665	0.0570188
ENSMUSG00000026031	12633	Cflar	3197.39	-0.144249	0.0507226	2.84388	0.00445672	0.0570981
ENSMUSG00000062209	13869	Erbb4	1151.76	-0.259704	0.0913571	2.84274	0.00447277	0.0572457
ENSMUSG00000024747	26358	Aldh1a7	18.9438	-0.330604	0.116307	2.84251	0.00447604	0.0572457
ENSMUSG00000030268	12035	Bcat1	81.671	0.409245	0.143998	-2.84201	0.00448295	0.0572844
ENSMUSG00000034484	67804	Snx2	990.624	0.207315	0.0729737	-2.84096	0.00449774	0.0574234
ENSMUSG00000089989	14256	Flt3l	308.076	-0.254264	0.0895711	2.83868	0.00453006	0.0577357
ENSMUSG00000071014	230075	Ndufb6	2352.59	0.138566	0.0488532	-2.83638	0.00456278	0.058052
ENSMUSG00000008200	55935	Fnbp4	1043.98	-0.182764	0.0644513	2.8357	0.0045726	0.0581266
ENSMUSG00000026365	12628	Cfh	20623.6	0.173326	0.0611315	-2.83529	0.00457839	0.0581499
ENSMUSG00000042109	105859	Csdc2	5637.13	-0.236967	0.0835953	2.8347	0.00458694	0.0582082
ENSMUSG00000015355	12506	Cd48	66.4128	0.415878	0.146733	-2.83425	0.0045934	0.0582398
ENSMUSG00000018819	16985	Lsp1	3511.27	0.157417	0.0555516	-2.8337	0.00460122	0.0582888
ENSMUSG00000028809	51796	Srrm1	3669.48	-0.154082	0.0543874	2.83305	0.00461067	0.0583582
ENSMUSG00000038633	13244	Degs1	2985.58	0.132984	0.0469545	-2.83219	0.00462306	0.0584143
ENSMUSG00000006221	29818	Hspb7	61310.2	-0.272248	0.0961207	2.83236	0.00462061	0.0584143
ENSMUSG00000059588	54598	Calcrl	1169.29	0.232685	0.0822535	-2.82888	0.00467114	0.0589711
ENSMUSG00000022831	15163	Hcls1	290.612	0.345486	0.122189	-2.82746	0.00469182	0.0591813
ENSMUSG00000039384	63953	Dusp10	529.924	-0.330317	0.116943	2.8246	0.004734	0.0596111
ENSMUSG00000032412	11933	Atp1b3	2967.71	0.144623	0.0512103	-2.8241	0.00474132	0.0596521
ENSMUSG00000025650	12836	Col7a1	58.1729	-0.411701	0.145834	2.82308	0.00475649	0.0597918
ENSMUSG00000044583	170743	Tlr7	96.7657	0.393363	0.139361	-2.82261	0.00476346	0.0598282
ENSMUSG00000072568	399603	Fam84b	575.243	-0.269729	0.0955867	2.82182	0.00477515	0.0599238
ENSMUSG00000021704	382793	Mtx3	552.938	-0.251948	0.0892954	2.82151	0.00477976	0.0599306
ENSMUSG00000043733	19247	Ptpn11	10362.2	-0.223086	0.0790979	2.82038	0.00479668	0.0600402
ENSMUSG00000053825	327814	Ppfia2	32.9088	0.420696	0.149254	-2.81866	0.00482241	0.0603109
ENSMUSG00000031662	71607	Snx20	24.5473	0.41828	0.148488	-2.81694	0.00484838	0.0605503
ENSMUSG00000039157	98952	Fam102a	533.749	-0.20714	0.0735363	2.81685	0.00484979	0.0605503
ENSMUSG00000061723	21957	Tnnt3	54.8565	-0.416591	0.147993	2.81493	0.00487871	0.0608597
ENSMUSG00000025213	107250	Kazald1	348.681	0.303903	0.108095	-2.81145	0.00493191	0.0613151
ENSMUSG00000060568	226610	Fam78b	549.825	0.224035	0.0796783	-2.81174	0.00492744	0.0613151
ENSMUSG00000055639	13134	Dach1	446.44	-0.308221	0.109622	2.81167	0.00492846	0.0613151
ENSMUSG00000040950	216864	Mgl2	332.469	0.354989	0.126297	-2.81075	0.00494262	0.061384
ENSMUSG00000075307	228003	Kbtbd10	4882.08	-0.138991	0.0494535	2.81054	0.0049458	0.061384
ENSMUSG00000030427	18726	Lilra6	27.1681	0.416503	0.148253	-2.80941	0.00496322	0.0615481
ENSMUSG00000023952	56055	Gtpbp2	1899	-0.1614	0.0574661	2.80861	0.00497561	0.0616497
ENSMUSG00000022770	13383	Dlg1	2952.2	-0.145813	0.0519271	2.80804	0.00498448	0.0617075
ENSMUSG00000010453	226976	4632411B12Rik	3568.09	-0.147438	0.0525326	2.8066	0.00500679	0.0619316
ENSMUSG00000044499	319415	Hs3st5	20.2315	-0.405308	0.144433	2.80621	0.00501285	0.0619403
ENSMUSG00000024505	68857	Dtwd2	60.7984	0.397558	0.141681	-2.80601	0.00501592	0.0619403
ENSMUSG00000010461	14051	Eya4	32.0362	0.4174	0.148772	-2.80564	0.00502162	0.0619586
ENSMUSG00000023036	93724	Pcdhga9	188.553	-0.296627	0.105796	2.80376	0.00505098	0.0622686
ENSMUSG00000023191	14789	Leprel2	951.199	0.24066	0.0858528	-2.80318	0.00506021	0.0623301
ENSMUSG00000032827	243725	Ppp1r9a	1228.09	-0.230727	0.0823317	2.80241	0.00507222	0.0623734
ENSMUSG00000007950	64296	Abhd8	1588.93	0.194386	0.0693608	-2.80253	0.00507031	0.0623734
ENSMUSG00000028041	11490	Adam15	2458.33	-0.1958	0.0699003	2.80113	0.00509238	0.062569
ENSMUSG00000001741	16170	Il16	558.625	0.249096	0.0889387	-2.80076	0.00509817	0.0625878
ENSMUSG00000000282	17428	Mnt	851.837	-0.196469	0.0701645	2.80012	0.00510841	0.0626612
ENSMUSG00000036202	51869	Rif1	1576.09	-0.20803	0.0743472	2.79809	0.00514054	0.0629501
ENSMUSG00000063511	20637	Snrnp70	3556.65	-0.149579	0.0534551	2.79822	0.0051385	0.0629501
ENSMUSG00000022292	382985	Rrm2b	855.962	-0.216253	0.0773331	2.79638	0.00516789	0.0631799
ENSMUSG00000020658	668212	Efr3b	695.899	-0.27001	0.096567	2.79609	0.00517253	0.063184
ENSMUSG00000000131	74204	Xpo6	1744.76	-0.203515	0.0728344	2.79422	0.0052025	0.0634973
ENSMUSG00000033054	244879	Npat	430.033	-0.252081	0.0902326	2.79368	0.00521115	0.0634974
ENSMUSG00000034574	208846	Daam1	3163.58	-0.181085	0.0648186	2.79372	0.00521061	0.0634974
ENSMUSG00000031302	245537	Nlgn3	105.661	0.344639	0.123463	-2.79144	0.00524735	0.0636745
ENSMUSG00000042359	99031	Osbpl6	1514.98	-0.195206	0.0699121	2.79217	0.00523558	0.0636745
ENSMUSG00000048058	241576	Ldlrad3	285.319	0.297869	0.106692	-2.79186	0.00524053	0.0636745
ENSMUSG00000038037	12703	Socs1	56.9479	-0.395603	0.141715	2.79153	0.00524587	0.0636745
ENSMUSG00000030513	18553	Pcsk6	3048.96	0.21731	0.077837	-2.79186	0.00524063	0.0636745
ENSMUSG00000038692	15412	Hoxb4	66.8757	-0.38857	0.139343	2.78858	0.00529399	0.0641714
ENSMUSG00000031838	65972	Ifi30	498.995	0.266073	0.0954217	-2.78839	0.00529703	0.0641714
ENSMUSG00000039232	74732	Stx11	315.276	-0.317356	0.113877	2.78684	0.00532249	0.0644267
ENSMUSG00000037820	21817	Tgm2	13701.9	-0.196086	0.0703695	2.78653	0.00532764	0.0644359
ENSMUSG00000039943	18798	Plcb4	2564.88	-0.225857	0.0810639	2.78616	0.00533367	0.0644558
ENSMUSG00000050390	97130	C77080	608.508	-0.275773	0.0989941	2.78575	0.00534044	0.0644846
ENSMUSG00000030148	26888	Clec4a2	33.0592	0.415269	0.149188	-2.78354	0.00537693	0.064872
ENSMUSG00000036054	234373	Sugp2	1196.56	-0.186944	0.0671998	2.78191	0.00540395	0.0651166
ENSMUSG00000022607	14083	Ptk2	1219.36	0.179952	0.0646954	-2.78152	0.0054105	0.0651166
ENSMUSG00000089762	72500	Ier5l	174.561	-0.356751	0.128256	2.78155	0.00541001	0.0651166
ENSMUSG00000031479	70160	Vps36	898.116	0.189748	0.0682443	-2.78042	0.00542879	0.0652832
ENSMUSG00000053964	16855	Lgals4	238.122	-0.395953	0.142459	2.77942	0.00544562	0.065432
ENSMUSG00000042961	268780	Egflam	609.674	0.228983	0.0823978	-2.77899	0.00545283	0.0654364
ENSMUSG00000037174	69257	Elf2	1742.48	0.195149	0.070226	-2.77887	0.00545489	0.0654364
ENSMUSG00000031485	114863	Prosc	2342.89	-0.144992	0.0521867	2.77833	0.00546396	0.0654917
ENSMUSG00000024909	58859	Efemp2	538.582	0.271948	0.0979057	-2.77765	0.00547537	0.0655751
ENSMUSG00000031849	12845	Comp	1593.47	0.290029	0.10457	-2.77354	0.00554503	0.066302
ENSMUSG00000027678	17979	Ncoa3	2751.92	-0.170148	0.0613535	2.77324	0.00555005	0.066302
ENSMUSG00000035835	216152	BC005764	56.8271	-0.397272	0.143285	2.77261	0.00556094	0.066302
ENSMUSG00000033809	208624	Alg3	390.086	0.229662	0.0828071	-2.77346	0.00554641	0.066302
ENSMUSG00000018648	56405	Dusp14	22.5079	0.407702	0.147026	-2.77299	0.00555435	0.066302
ENSMUSG00000005533	16001	Igf1r	3498.68	-0.156596	0.0564823	2.77248	0.00556314	0.066302
ENSMUSG00000038173	320981	Enpp6	632.424	0.214605	0.0774513	-2.77084	0.00559118	0.066568
ENSMUSG00000026826	18227	Nr4a2	122.51	0.401511	0.14493	-2.77038	0.00559905	0.066568
ENSMUSG00000036712	74256	Cyld	1918.1	-0.164639	0.0594275	2.77042	0.0055984	0.066568
ENSMUSG00000022297	14368	Fzd6	928.412	-0.16874	0.060922	2.76977	0.0056096	0.0666396
ENSMUSG00000045328	229841	Cenpe	30.4668	0.390797	0.141118	-2.7693	0.00561771	0.0666819
ENSMUSG00000029587	231866	Zfp12	506.36	-0.243425	0.0879403	2.76807	0.0056389	0.0668255
ENSMUSG00000033016	18018	Nfatc1	1346.65	-0.226921	0.081973	2.76824	0.005636	0.0668255
ENSMUSG00000033965	20502	Slc16a2	1699.46	0.217515	0.0786024	-2.76728	0.00565267	0.0669347
ENSMUSG00000062127	80281	Cttnbp2nl	1314.41	0.186503	0.0674112	-2.76665	0.00566354	0.0670046
ENSMUSG00000033419	20616	Snap91	810.942	-0.222329	0.0803674	2.76641	0.00566769	0.0670046
ENSMUSG00000020092	27355	X99384	983.862	-0.202177	0.0731472	2.76398	0.00571006	0.067343
ENSMUSG00000022704	106248	Qtrtd1	399.313	-0.23485	0.0849896	2.76327	0.00572246	0.0674351
ENSMUSG00000067336	12168	Bmpr2	1824.69	-0.200106	0.0724577	2.76169	0.00575029	0.0677087
ENSMUSG00000064302	76707	Clasp1	14933.6	-0.173463	0.0628339	2.76066	0.00576855	0.0678694
ENSMUSG00000058267	64659	Mrps14	687.193	0.198803	0.0720716	-2.75841	0.00580832	0.0682826
ENSMUSG00000027221	76969	Chst1	223.819	-0.342622	0.124318	2.756	0.00585124	0.0687322
ENSMUSG00000032299	66199	Commd4	337.469	0.234214	0.0850565	-2.75362	0.00589394	0.0691247
ENSMUSG00000061436	15258	Hipk2	1724.08	-0.29035	0.105443	2.75362	0.00589406	0.0691247
ENSMUSG00000032014	102644	Oaf	370.376	0.264737	0.0961509	-2.75335	0.00589884	0.0691256
ENSMUSG00000026069	17082	Il1rl1	29.437	0.408384	0.148352	-2.7528	0.00590878	0.0691868
ENSMUSG00000035279	269855	A430110N23Rik	622.112	0.400865	0.145729	-2.75076	0.00594563	0.069563
ENSMUSG00000003123	16890	Lipe	1186.18	-0.408005	0.148366	2.74999	0.00595967	0.0696718
ENSMUSG00000032135	84004	Mcam	2317.15	-0.138721	0.0504659	2.7488	0.00598133	0.0698693
ENSMUSG00000045962	232341	Wnk1	20282.2	-0.166663	0.0606527	2.74782	0.00599927	0.0700233
ENSMUSG00000066191	75691	Anks6	193.33	0.309495	0.112656	-2.74726	0.00600956	0.0700877
ENSMUSG00000026473	14645	Glul	4133.23	-0.215221	0.078348	2.74699	0.00601443	0.0700889
ENSMUSG00000031145	54630	Prickle3	361.22	-0.295298	0.107533	2.74612	0.00603047	0.0701645
ENSMUSG00000028072	18211	Ntrk1	30.1591	0.409912	0.14927	-2.74612	0.00603044	0.0701645
ENSMUSG00000045777	320802	6330512M04Rik	40.761	-0.408961	0.148981	2.74506	0.00605005	0.0703366
ENSMUSG00000074896	15959	Ifit3	92.1679	0.399249	0.145535	-2.74332	0.00608218	0.0705263
ENSMUSG00000033082	243653	Clec1a	328.086	0.273094	0.0995492	-2.7433	0.00608244	0.0705263
ENSMUSG00000037112	235344	Sik2	416.319	-0.280918	0.102396	2.74344	0.00607997	0.0705263
ENSMUSG00000034173	71970	2410018M08Rik	33.1985	-0.408386	0.148875	2.74314	0.00608556	0.0705263
ENSMUSG00000033107	67664	Rnf125	75.541	0.386989	0.14115	-2.74168	0.00611265	0.0707844
ENSMUSG00000020657	217378	Dnajc27	807.362	-0.200979	0.073321	2.74109	0.00612359	0.0708553
ENSMUSG00000037347	60322	Chst7	180.762	0.328053	0.119711	-2.74037	0.00613705	0.0709551
ENSMUSG00000033170	105844	Card10	1154.41	-0.215656	0.0787273	2.73928	0.00615734	0.071032
ENSMUSG00000040852	213556	Plekhh2	359.806	0.234716	0.0856921	-2.73906	0.00616156	0.071032
ENSMUSG00000028487	242509	Bnc2	113.191	0.366216	0.133681	-2.73948	0.00615361	0.071032
ENSMUSG00000020121	117600	Srgap1	171.378	0.328926	0.120091	-2.73898	0.00616303	0.071032
ENSMUSG00000039193	268973	Nlrc4	26.6508	0.408126	0.149121	-2.73687	0.0062026	0.071432
ENSMUSG00000031520	22341	Vegfc	227.479	0.296399	0.108366	-2.73517	0.00623472	0.0717456
ENSMUSG00000026646	64707	Suv39h2	33.4487	0.406679	0.148713	-2.73466	0.0062444	0.0717529
ENSMUSG00000029163	100952	Emilin1	1672.91	0.271265	0.0991963	-2.73463	0.00624511	0.0717529
ENSMUSG00000047502	381538	Heatr8	82.6786	-0.381429	0.139517	2.73393	0.00625836	0.0718489
ENSMUSG00000024036	224674	Slc37a1	591.702	-0.217561	0.0796611	2.73108	0.00631279	0.0720237
ENSMUSG00000061048	12560	Cdh3	269.611	0.36139	0.132321	-2.73115	0.0063114	0.0720237
ENSMUSG00000002289	57875	Angptl4	208.728	-0.330713	0.121065	2.73171	0.00630071	0.0720237
ENSMUSG00000032024	71566	9030425E11Rik	426.559	0.278611	0.102009	-2.73123	0.00630982	0.0720237
ENSMUSG00000049577	22761	Zfpm1	1152.5	-0.215255	0.0787995	2.73168	0.00630129	0.0720237
ENSMUSG00000021939	13030	Ctsb	22007.8	0.173242	0.0634268	-2.73137	0.00630725	0.0720237
ENSMUSG00000013921	76686	Clip3	655.606	0.219494	0.0803444	-2.73191	0.00629676	0.0720237
ENSMUSG00000045409	79263	Trim39	579.948	-0.23981	0.0878455	2.72991	0.00633514	0.0721666
ENSMUSG00000028226	17389	Mmp16	126.348	0.321613	0.117805	-2.73005	0.00633241	0.0721666
ENSMUSG00000029335	110075	Bmp3	332.32	0.354603	0.129989	-2.72794	0.00637306	0.0725422
ENSMUSG00000026664	16922	Phyh	6933.09	-0.165635	0.0607259	2.72759	0.00637994	0.0725644
ENSMUSG00000025577	12416	Cbx2	157.288	-0.325955	0.119531	2.72695	0.00639224	0.072648
ENSMUSG00000028278	52187	Rragd	3325.02	-0.186186	0.0682868	2.72653	0.00640034	0.0726839
ENSMUSG00000066647	330503	Gm5113	224.421	-0.26954	0.0988778	2.726	0.00641077	0.0727461
ENSMUSG00000047388	234776	Atmin	1408.51	-0.163686	0.0600531	2.7257	0.00641662	0.0727563
ENSMUSG00000034243	224139	Golgb1	4498.6	-0.165309	0.0606567	2.72532	0.00642394	0.0727832
ENSMUSG00000026090	72097	2010300C02Rik	138.964	0.373317	0.137013	-2.72468	0.00643639	0.0728681
ENSMUSG00000039081	218820	Zfp503	89.8636	-0.372114	0.136605	2.72402	0.00644923	0.0729572
ENSMUSG00000033478	226252	Fam160b1	1080.1	-0.175983	0.0646141	2.72359	0.00645764	0.0729962
ENSMUSG00000022964	77975	Tmem50b	1674.08	0.149694	0.0549838	-2.72252	0.00647864	0.0731772
ENSMUSG00000035770	234663	Dync1li2	4166.04	-0.141665	0.0520438	2.72203	0.00648821	0.073229
ENSMUSG00000031377	12169	Bmx	696.194	0.247341	0.0908955	-2.72116	0.00650526	0.0733651
ENSMUSG00000015085	12496	Entpd2	1222.17	0.216634	0.079665	-2.71931	0.00654175	0.0737088
ENSMUSG00000031903	192654	Pla2g15	277.216	0.304786	0.11209	-2.71911	0.00654577	0.0737088
ENSMUSG00000039096	237926	Rsad1	592.056	-0.192191	0.0706963	2.71855	0.00655685	0.0737771
ENSMUSG00000020264	246049	Slc36a2	2816.31	-0.138278	0.0508708	2.71822	0.00656345	0.0737949
ENSMUSG00000048707	97031	Tprn	125.307	-0.341611	0.125747	2.71664	0.00659474	0.0739769
ENSMUSG00000043090	330788	Zfp866	705.587	-0.219239	0.0806875	2.71714	0.00658492	0.0739769
ENSMUSG00000030256	79362	Bhlhe41	376.112	-0.339528	0.124971	2.71686	0.00659053	0.0739769
ENSMUSG00000048520	320118	Fbxl13	30.2442	0.403309	0.148502	-2.71584	0.0066107	0.0740993
ENSMUSG00000024122	18607	Pdpk1	2247.61	-0.186371	0.0686352	2.71539	0.00661984	0.0741452
ENSMUSG00000066152	20530	Slc31a2	683.666	0.208743	0.076908	-2.71419	0.00664375	0.0742998
ENSMUSG00000022507	69053	1810013L24Rik	1553.59	-0.214696	0.0791006	2.71421	0.00664341	0.0742998
ENSMUSG00000067274	11837	Rplp0	6339.47	0.159211	0.0586689	-2.71372	0.00665325	0.0743495
ENSMUSG00000041235	320790	Chd7	1001.91	-0.187047	0.0689525	2.71269	0.00667389	0.0744103
ENSMUSG00000033880	19039	Lgals3bp	269.076	0.309883	0.114228	-2.71285	0.00667077	0.0744103
ENSMUSG00000037029	26465	Zfp146	1274.77	-0.153532	0.0565967	2.71275	0.00667284	0.0744103
ENSMUSG00000035498	109332	Cdcp1	224.573	-0.344509	0.127064	2.7113	0.00670207	0.0745614
ENSMUSG00000026890	16874	Lhx6	75.8527	-0.363577	0.134091	2.71142	0.00669965	0.0745614
ENSMUSG00000033392	76499	Clasp2	3222.72	-0.170113	0.0627431	2.71127	0.00670266	0.0745614
ENSMUSG00000024640	107272	Psat1	307.195	0.273841	0.101093	-2.7088	0.0067527	0.0750612
ENSMUSG00000047557	17035	Lxn	129.447	0.336443	0.124222	-2.70841	0.00676075	0.0750939
ENSMUSG00000028307	230163	Aldob	90.7741	-0.40415	0.149262	2.70766	0.00677603	0.0752067
ENSMUSG00000038690	57423	Atp5j2	6809.61	0.183959	0.0679491	-2.7073	0.00678324	0.07523
ENSMUSG00000048915	13640	Efna5	488.667	0.227825	0.0841853	-2.70623	0.00680527	0.0754173
ENSMUSG00000062157	242700	Il28ra	119.309	-0.333275	0.123192	2.70533	0.0068237	0.0755077
ENSMUSG00000038844	16558	Kif16b	1698.07	-0.169869	0.0627886	2.70541	0.00682192	0.0755077
ENSMUSG00000029468	18439	P2rx7	441.541	0.263193	0.0973289	-2.70416	0.00684769	0.0757162
ENSMUSG00000025185	67573	Loxl4	120.376	0.368894	0.136457	-2.70337	0.00686411	0.0758407
ENSMUSG00000038578	634731	Susd1	74.8874	0.398771	0.147558	-2.70246	0.00688285	0.0759906
ENSMUSG00000021423	17084	Ly86	57.9318	0.40253	0.148978	-2.70194	0.00689366	0.0760528
ENSMUSG00000001739	60363	Cldn15	966.268	0.312685	0.115758	-2.7012	0.0069089	0.0761067
ENSMUSG00000051379	71436	Flrt3	34.5322	-0.403259	0.14931	2.70081	0.00691716	0.0761406
ENSMUSG00000061462	380698	Obscn	56276.7	-0.198497	0.0735101	2.70027	0.00692822	0.0762052
ENSMUSG00000047434	268880	AI480653	519.323	0.241502	0.0894642	-2.69942	0.00694595	0.0763431
ENSMUSG00000055653	14734	Gpc3	1324.56	0.290992	0.107841	-2.69834	0.00696871	0.076536
ENSMUSG00000041415	192119	Dicer1	1704.2	-0.186749	0.0692314	2.69746	0.00698713	0.076681
ENSMUSG00000002885	26364	Cd97	2233.75	-0.173889	0.0645112	2.69549	0.00702845	0.0770194
ENSMUSG00000056962	107817	Jmjd6	1110.62	0.215492	0.0799401	-2.69567	0.00702473	0.0770194
ENSMUSG00000021665	15212	Hexb	1178.53	0.202298	0.0750772	-2.69454	0.00704869	0.0771836
ENSMUSG00000009563	30933	Tor2a	355.215	0.241882	0.0897916	-2.69382	0.00706391	0.0772928
ENSMUSG00000025969	18187	Nrp2	2195.46	0.258984	0.0961946	-2.69229	0.00709629	0.0775893
ENSMUSG00000026072	16177	Il1r1	914.295	-0.223107	0.0829142	2.69082	0.00712774	0.0778752
ENSMUSG00000019996	17761	Mtap7	488.591	-0.232563	0.0864682	2.68957	0.00715432	0.0781075
ENSMUSG00000038738	243961	Shank1	144.687	-0.309368	0.115068	2.68858	0.0071757	0.078229
ENSMUSG00000078667	73545	1700094D03Rik	169.752	-0.31092	0.115646	2.68856	0.00717609	0.078229
ENSMUSG00000021782	71228	Dlg5	831.584	0.176276	0.0656402	-2.68548	0.00724253	0.0788947
ENSMUSG00000045100	67582	Slc25a26	1576.93	0.261183	0.097268	-2.68519	0.00724884	0.078905
ENSMUSG00000008226	74616	Scrn3	624.02	-0.247783	0.0923282	2.68371	0.00728092	0.0791955
ENSMUSG00000063531	20349	Sema3e	97.1449	0.364851	0.135969	-2.68334	0.00728901	0.0792249
ENSMUSG00000000804	237898	Usp32	1302.46	-0.173247	0.0646059	2.68159	0.0073273	0.079351
ENSMUSG00000029201	22235	Ugdh	1108.27	0.196329	0.0731926	-2.68235	0.0073106	0.079351
ENSMUSG00000031910	15118	Has3	191.863	-0.304953	0.113718	2.68166	0.00732582	0.079351
ENSMUSG00000015950	17969	Ncf1	201.403	0.312546	0.116526	-2.6822	0.00731406	0.079351
ENSMUSG00000022021	56419	Diap3	35.3049	0.400291	0.149275	-2.68158	0.00732761	0.079351
ENSMUSG00000027947	16194	Il6ra	300.238	0.301073	0.112305	-2.68085	0.00734344	0.0794638
ENSMUSG00000058498	433809	Rnf207	2823.59	-0.238655	0.0890395	2.68033	0.00735499	0.0795302
ENSMUSG00000039047	329777	Pigk	1179.34	0.164112	0.0612518	-2.6793	0.0073777	0.0796585
ENSMUSG00000034471	140721	Caskin2	2901.56	-0.207524	0.0774679	2.67884	0.00738767	0.0797076
ENSMUSG00000022372	20491	Sla	74.8667	0.375377	0.140165	-2.67811	0.00740385	0.0798236
ENSMUSG00000041870	68420	Ankrd13a	1573.44	0.157972	0.0590053	-2.67726	0.00742279	0.0799692
ENSMUSG00000024065	57440	Ehd3	307.666	0.256968	0.0960168	-2.67628	0.00744441	0.0801432
ENSMUSG00000036450	319594	Hif1an	3011.35	-0.192863	0.0720765	2.67581	0.00745479	0.0801963
ENSMUSG00000060224	74580	Pyroxd2	722.667	-0.248851	0.0930517	2.67433	0.00748791	0.0804937
ENSMUSG00000029822	71720	Osbpl3	1671.18	-0.191653	0.0716779	2.67381	0.00749957	0.0805601
ENSMUSG00000031548	20377	Sfrp1	2118.45	0.233586	0.0873766	-2.67333	0.00751027	0.0806161
ENSMUSG00000027429	27054	Sec23b	744.029	0.187762	0.0702441	-2.67299	0.00751792	0.0806393
ENSMUSG00000024516	66286	Sec11c	447.224	0.256105	0.0958297	-2.6725	0.00752891	0.0806983
ENSMUSG00000031112	70415	2610018G03Rik	252.081	0.322273	0.120614	-2.67193	0.00754158	0.0807752
ENSMUSG00000050721	102595	Plekho2	1573.13	0.288668	0.108079	-2.6709	0.00756492	0.0809661
ENSMUSG00000031864	70885	Ints10	811.406	-0.232087	0.0870201	2.66705	0.00765206	0.0815425
ENSMUSG00000024420	225207	Zfp521	2043.94	0.192896	0.0723087	-2.66768	0.00763776	0.0815425
ENSMUSG00000042647	338350	Acad12	1349.93	-0.23222	0.0870637	2.66724	0.00764761	0.0815425
ENSMUSG00000040522	170744	Tlr8	36.6437	0.398028	0.149225	-2.66731	0.00764613	0.0815425
ENSMUSG00000029861	76156	Fam131b	213.452	0.274014	0.102729	-2.66734	0.00764544	0.0815425
ENSMUSG00000024713	18552	Pcsk5	369.382	0.22853	0.0856666	-2.66767	0.00763795	0.0815425
ENSMUSG00000053310	64011	Nrgn	270.705	-0.365509	0.137098	2.66604	0.00767505	0.081669
ENSMUSG00000035621	59090	Midn	4327	0.185433	0.0695769	-2.66514	0.00769553	0.0818276
ENSMUSG00000039621	277360	Prex1	526.854	0.256415	0.096277	-2.6633	0.00773776	0.0822172
ENSMUSG00000043439	103551	E130012A19Rik	43.3745	0.397024	0.149176	-2.66145	0.00778039	0.0825508
ENSMUSG00000070469	269959	Adamtsl3	396.907	0.267097	0.100403	-2.66025	0.00780828	0.0827546
ENSMUSG00000017734	52840	Dbndd2	717.796	-0.215087	0.0808823	2.65926	0.00783129	0.0828823
ENSMUSG00000025232	15211	Hexa	2225.55	0.191511	0.0720458	-2.65818	0.00785633	0.0830566
ENSMUSG00000000552	29813	Zfp385a	1358.17	0.167076	0.062869	-2.65753	0.00787159	0.0831582
ENSMUSG00000034621	237943	Gpatch8	2280.63	-0.187427	0.0705353	2.65721	0.00787899	0.083175
ENSMUSG00000021461	14088	Fancc	196.643	0.274946	0.103481	-2.65698	0.0078845	0.083175
ENSMUSG00000021799	30044	Opn4	443.55	0.243606	0.0917963	-2.65376	0.00795999	0.0839111
ENSMUSG00000036275	213673	9530068E07Rik	4767.58	0.118414	0.0446569	-2.65164	0.00801025	0.0842596
ENSMUSG00000024736	98170	Tmem132a	650.376	0.242026	0.0912658	-2.65188	0.0080046	0.0842596
ENSMUSG00000030465	234353	Psd3	9484.98	-0.206394	0.077934	2.64832	0.00808934	0.0849698
ENSMUSG00000036887	12259	C1qa	1669.79	0.381239	0.143979	-2.64787	0.00809996	0.0850206
ENSMUSG00000018846	211347	Pank3	1083.99	-0.195021	0.0736997	2.64616	0.00814117	0.0853922
ENSMUSG00000015093	69454	Clic3	93.0215	0.380954	0.144034	-2.64488	0.0081719	0.0856227
ENSMUSG00000048486	228859	Fitm2	2958.48	-0.155353	0.0587399	2.64476	0.0081748	0.0856227
ENSMUSG00000026249	20720	Serpine2	1122.26	0.178768	0.0676148	-2.64392	0.00819511	0.0856671
ENSMUSG00000031010	22284	Usp9x	4194.37	-0.205845	0.0778468	2.64423	0.00818761	0.0856671
ENSMUSG00000031585	68153	Gtf2e2	377.506	0.229996	0.0869921	-2.64387	0.00819653	0.0856671
ENSMUSG00000039899	14190	Fgl2	4976.81	0.207451	0.0784736	-2.64358	0.00820353	0.0856793
ENSMUSG00000033327	81877	Tnxb	7808.66	0.24553	0.0929051	-2.64281	0.00822214	0.0858127
ENSMUSG00000047067	67446	Dusp28	341.796	0.237497	0.0898754	-2.64251	0.00822941	0.0858277
ENSMUSG00000042302	216565	Ehbp1	8306.42	-0.206995	0.0783627	2.6415	0.00825401	0.0859622
ENSMUSG00000037270	229227	4932438A13Rik	2907.18	-0.174348	0.0660033	2.6415	0.00825397	0.0859622
ENSMUSG00000038522	215929	AI317395	79.9286	-0.36182	0.137057	2.63993	0.00829238	0.0863007
ENSMUSG00000019539	52377	Rcn3	2142.91	0.276639	0.10481	-2.63943	0.00830468	0.0863064
ENSMUSG00000028134	56195	Ptbp2	679.501	-0.260526	0.0987044	2.63946	0.00830392	0.0863064
ENSMUSG00000045160	78653	Bola3	1125.97	0.18136	0.0687207	-2.63909	0.00831279	0.0863297
ENSMUSG00000015202	215748	Cnksr3	466.408	-0.213041	0.0807414	2.63856	0.00832598	0.0864056
ENSMUSG00000073557	329251	Ppp1r12b	1828.91	-0.266329	0.100967	2.63777	0.00834527	0.0865446
ENSMUSG00000057230	269774	Aak1	4602.48	-0.186918	0.0708757	2.63726	0.00835785	0.0866139
ENSMUSG00000054027	103466	Nt5dc3	2009.28	-0.199323	0.0756155	2.63601	0.00838871	0.0868725
ENSMUSG00000037169	18109	Mycn	67.6409	-0.38713	0.146889	2.63552	0.00840083	0.0869368
ENSMUSG00000070394	69186	1810027O10Rik	944.002	0.175078	0.0664498	-2.63474	0.00842028	0.0870768
ENSMUSG00000023800	24001	Tiam2	299.317	-0.349266	0.132579	2.6344	0.00842856	0.0871011
ENSMUSG00000006676	71472	Usp19	6337.99	-0.148157	0.0562515	2.63382	0.00844294	0.0871884
ENSMUSG00000010175	19130	Prox1	1087.12	-0.177927	0.0675691	2.63325	0.00845709	0.0872177
ENSMUSG00000071847	494504	Apcdd1	239.048	0.314733	0.119523	-2.63323	0.00845766	0.0872177
ENSMUSG00000035671	212168	Zswim4	630.115	-0.208537	0.0792667	2.63083	0.00851762	0.087713
ENSMUSG00000055320	21676	Tead1	10114.9	-0.122608	0.0466043	2.63083	0.00851762	0.087713
ENSMUSG00000027984	15107	Hadh	5588.71	-0.108506	0.0412716	2.62907	0.00856186	0.0879836
ENSMUSG00000046185	74352	Zfp84	583.873	-0.224511	0.0853851	2.62939	0.00855381	0.0879836
ENSMUSG00000027245	67693	2310003F16Rik	2662.74	0.154303	0.0586892	-2.62916	0.00855962	0.0879836
ENSMUSG00000021585	12380	Cast	3781.67	-0.145286	0.0552994	2.62726	0.00860749	0.0883907
ENSMUSG00000043535	269254	Setx	2179.31	-0.170547	0.0649423	2.62613	0.00863614	0.088473
ENSMUSG00000031129	331004	Slc9a9	294.346	0.266631	0.101532	-2.62608	0.00863744	0.088473
ENSMUSG00000050732	22320	Vamp8	1003.91	0.187728	0.071479	-2.62635	0.00863072	0.088473
ENSMUSG00000041559	14264	Fmod	1016.93	0.29976	0.114176	-2.62542	0.0086542	0.088561
ENSMUSG00000026051	78896	1500015O10Rik	55.6197	0.388623	0.148076	-2.62448	0.00867806	0.0887432
ENSMUSG00000022139	105559	Mbnl2	4551.08	-0.177098	0.0674933	2.62394	0.00869192	0.0888232
ENSMUSG00000044122	216974	Proca1	34.5851	-0.39111	0.1491	2.62313	0.00871254	0.0889102
ENSMUSG00000054083	60594	Capn12	13.121	-0.35409	0.134976	2.62336	0.00870682	0.0889102
ENSMUSG00000020926	11488	Adam11	1980.59	-0.207515	0.0791233	2.62268	0.00872424	0.0889117
ENSMUSG00000020758	192897	Itgb4	446.778	-0.290394	0.110725	2.62265	0.00872478	0.0889117
ENSMUSG00000027784	242083	Ppm1l	633.122	-0.24652	0.094009	2.6223	0.00873378	0.0889417
ENSMUSG00000039294	217370	BC017643	505.503	0.210742	0.0804155	-2.62067	0.00877576	0.0892421
ENSMUSG00000059895	19245	Ptp4a3	5247.9	-0.210029	0.0801439	2.62065	0.00877615	0.0892421
ENSMUSG00000044548	59036	Dact1	378.468	-0.266426	0.101678	2.6203	0.00878517	0.0892421
ENSMUSG00000019256	11622	Ahr	272.534	-0.280994	0.107241	2.62021	0.00878757	0.0892421
ENSMUSG00000030220	11857	Arhgdib	813.8	0.262347	0.100135	-2.61993	0.00879477	0.0892438
ENSMUSG00000003810	17776	Mast2	7714.28	-0.200538	0.0765559	2.6195	0.00880595	0.0892438
ENSMUSG00000024968	104383	Rcor2	172.574	-0.329917	0.125945	2.61953	0.00880508	0.0892438
ENSMUSG00000006522	16426	Itih3	57.2186	-0.384515	0.146847	2.61848	0.00883227	0.0894488
ENSMUSG00000049044	56508	Rapgef4	476.838	-0.207169	0.079127	2.61818	0.00883997	0.089451
ENSMUSG00000002602	26362	Axl	8163.83	0.18914	0.072246	-2.618	0.00884466	0.089451
ENSMUSG00000022146	18414	Osmr	1679.51	-0.203551	0.0777703	2.61733	0.00886204	0.0895651
ENSMUSG00000057897	12323	Camk2b	829.801	-0.201544	0.0770165	2.6169	0.00887331	0.0896174
ENSMUSG00000055254	18212	Ntrk2	71.1656	-0.389276	0.148822	2.61571	0.00890409	0.0897891
ENSMUSG00000024083	224938	Pja2	5325.51	-0.154547	0.0590958	2.61519	0.00891786	0.0897891
ENSMUSG00000021118	27260	Plek2	14.7777	-0.35858	0.137101	2.61544	0.00891131	0.0897891
ENSMUSG00000063415	232174	Cyp26b1	217.099	-0.363784	0.139111	2.61507	0.00892087	0.0897891
ENSMUSG00000021061	20741	Spnb1	12107.5	-0.158279	0.0605617	2.61352	0.00896155	0.0901369
ENSMUSG00000045312	218454	Lhfpl2	393.564	0.305752	0.117037	-2.61245	0.00898966	0.090296
ENSMUSG00000043017	19222	Ptgir	406.237	-0.274812	0.105193	2.61246	0.0089894	0.090296
ENSMUSG00000018733	103737	Pex12	316.978	-0.236607	0.090587	2.61194	0.00900308	0.0903691
ENSMUSG00000030064	232288	Frmd4b	1428.11	-0.20746	0.0794349	2.61169	0.00900947	0.0903715
ENSMUSG00000031309	110651	Rps6ka3	758.927	-0.216607	0.0829553	2.61112	0.0090245	0.0904344
ENSMUSG00000041216	74438	Clvs1	103.172	0.321241	0.123034	-2.61099	0.00902806	0.0904344
ENSMUSG00000020773	217333	Trim47	1720.55	-0.265932	0.101928	2.60901	0.00908037	0.0908965
ENSMUSG00000037406	330723	Htra4	454.707	0.297027	0.113871	-2.60845	0.00909541	0.090985
ENSMUSG00000002910	70807	Arrdc2	243.805	0.344706	0.132166	-2.60814	0.00910362	0.0910052
ENSMUSG00000028551	12580	Cdkn2c	342.275	-0.241955	0.0928162	2.60682	0.00913865	0.091205
ENSMUSG00000032548	24059	Slco2a1	435.061	0.282068	0.108209	-2.60669	0.00914222	0.091205
ENSMUSG00000061689	228836	Dlgap4	2541.16	-0.155674	0.0597462	2.60558	0.00917185	0.0913146
ENSMUSG00000020692	217011	Nle1	500.7	0.314637	0.120745	-2.6058	0.00916602	0.0913146
ENSMUSG00000040209	170753	Zfp704	1853.48	-0.153361	0.0588583	2.6056	0.00917132	0.0913146
ENSMUSG00000030849	14183	Fgfr2	106.213	0.367389	0.141017	-2.60528	0.00917988	0.0913326
ENSMUSG00000035930	26887	Chst4	344.516	0.347105	0.13329	-2.60414	0.00921044	0.0915747
ENSMUSG00000046546	224093	Fam43a	864.462	0.189526	0.0727882	-2.60381	0.00921946	0.0916024
ENSMUSG00000025498	54123	Irf7	157.165	0.314572	0.120894	-2.60204	0.00926714	0.092014
ENSMUSG00000054277	66251	Arfgap3	831.085	-0.184108	0.0707646	2.60169	0.00927649	0.0920445
ENSMUSG00000020189	237542	Osbpl8	1982.13	-0.192183	0.0738808	2.60126	0.00928824	0.0920989
ENSMUSG00000031712	16168	Il15	527.744	0.209056	0.0803767	-2.60096	0.0092964	0.0921042
ENSMUSG00000038437	246198	Mllt6	4395.4	-0.162945	0.0626525	2.60078	0.00930131	0.0921042
ENSMUSG00000050592	241303	Fam78a	1356.02	0.183512	0.0705751	-2.60024	0.00931586	0.0921862
ENSMUSG00000027293	98878	Ehd4	37134.4	-0.139671	0.0537266	2.59967	0.00933131	0.092277
ENSMUSG00000018340	11749	Anxa6	7935.25	0.158054	0.0608386	-2.59792	0.00937906	0.0926868
ENSMUSG00000074194	244556	Zfp791	61.8925	-0.362748	0.139684	2.59691	0.00940666	0.0928347
ENSMUSG00000052942	226075	Glis3	70.1307	0.367941	0.141681	-2.59698	0.00940478	0.0928347
ENSMUSG00000047344	236285	Lancl3	120.677	-0.340269	0.131084	2.59581	0.00943693	0.093071
ENSMUSG00000035184	629059	Fam124a	411.979	-0.252576	0.0973219	2.59526	0.00945193	0.0931563
ENSMUSG00000025083	226250	Afap1l2	315.593	0.273099	0.105241	-2.59499	0.00945946	0.0931681
ENSMUSG00000020424	71962	Gatsl3	188.697	0.286475	0.110449	-2.59372	0.00949443	0.0933874
ENSMUSG00000055368	20538	Slc6a2	87.1215	0.383584	0.147907	-2.59342	0.00950255	0.0934047
ENSMUSG00000032776	244049	Mctp2	55.1875	0.383471	0.147906	-2.59266	0.00952376	0.0935053
ENSMUSG00000038121	108654	4933403F05Rik	4947.55	-0.174854	0.0674436	2.59259	0.00952552	0.0935053
ENSMUSG00000024053	246707	Emilin2	1340.54	0.215369	0.0830784	-2.59236	0.00953207	0.0935071
ENSMUSG00000022401	321003	Xpnpep3	271.135	-0.252874	0.0975572	2.59206	0.00954038	0.0935262
ENSMUSG00000005656	72183	Snx6	1009.6	0.156581	0.0604436	-2.59053	0.00958292	0.0938807
ENSMUSG00000029192	100855	Tbc1d14	778.452	0.171917	0.0663806	-2.58987	0.00960124	0.0939211
ENSMUSG00000015365	83456	Mov10l1	770.006	0.21141	0.0816324	-2.58978	0.00960367	0.0939211
ENSMUSG00000021798	24131	Ldb3	34738.3	-0.174848	0.0675171	2.58969	0.00960623	0.0939211
ENSMUSG00000036777	68743	Anln	54.6713	0.386192	0.149147	-2.58935	0.00961584	0.0939526
ENSMUSG00000034312	232227	Iqsec1	6426.33	-0.110628	0.0427466	2.588	0.00965343	0.0942573
ENSMUSG00000023224	12258	Serping1	14682.1	0.241012	0.0931518	-2.5873	0.00967302	0.0943301
ENSMUSG00000020593	14245	Lpin1	6168.29	-0.198141	0.0765827	2.58728	0.00967373	0.0943301
ENSMUSG00000022306	22762	Zfpm2	897.027	-0.17137	0.0662518	2.58665	0.00969151	0.0944408
ENSMUSG00000027365	58800	Trpm7	2774.47	-0.245778	0.0950434	2.58595	0.009711	0.094568
ENSMUSG00000015656	15481	Hspa8	1369.3	0.172153	0.0665926	-2.58517	0.00973312	0.0947206
ENSMUSG00000025757	18415	Hspa4l	2323.53	-0.145484	0.0562867	2.58469	0.00974659	0.0947262
ENSMUSG00000021287	74335	Xrcc3	304.411	-0.239916	0.0928591	2.58366	0.00977589	0.0948856
ENSMUSG00000059325	74318	Hopx	9005	0.148214	0.0573616	-2.58386	0.00977018	0.0948856
ENSMUSG00000018428	11640	Akap1	4260.14	-0.175996	0.0681428	2.58275	0.0098016	0.0950096
ENSMUSG00000022742	12892	Cpox	1284.41	-0.19025	0.0736798	2.58212	0.00981967	0.0951162
ENSMUSG00000025105	12173	Bnc1	375.599	-0.333937	0.129337	2.58191	0.00982555	0.0951162
ENSMUSG00000033453	235130	Adamts15	1842.95	0.273511	0.105984	-2.58069	0.00986019	0.0952633
ENSMUSG00000062963	66155	Ufc1	778.36	0.173145	0.0670876	-2.58088	0.00985502	0.0952633
ENSMUSG00000002416	68198	Ndufb2	3029.18	0.154644	0.0599192	-2.58087	0.0098552	0.0952633
ENSMUSG00000040699	67803	Limd2	390.363	0.220118	0.0853333	-2.57951	0.0098942	0.095529
ENSMUSG00000007783	78070	Cpt1c	208.768	0.284086	0.110177	-2.57844	0.00992477	0.0956985
ENSMUSG00000031778	20312	Cx3cl1	248.194	-0.24649	0.0955955	2.57847	0.00992385	0.0956985
ENSMUSG00000062488	667370	I830012O16Rik	62.9272	0.384795	0.149308	-2.57719	0.00996058	0.0958551
ENSMUSG00000060548	29820	Tnfrsf19	360.782	-0.256176	0.0993928	2.57741	0.00995448	0.0958551
ENSMUSG00000028108	13601	Ecm1	3481.58	0.260954	0.101253	-2.57724	0.00995917	0.0958551
ENSMUSG00000036504	75454	Phpt1	1421.42	0.202333	0.0785516	-2.5758	0.010001	0.096181
ENSMUSG00000021835	12159	Bmp4	458.383	-0.255635	0.0992778	2.57495	0.0100254	0.0963169
ENSMUSG00000029833	21848	Trim24	1078.68	-0.17966	0.0697746	2.57485	0.0100282	0.0963169
ENSMUSG00000089715	494448	Cbx6	2979.02	0.168934	0.0656229	-2.57432	0.0100437	0.0964025
ENSMUSG00000056271	235416	Lman1l	26.1981	-0.364627	0.141657	2.57401	0.0100529	0.0964275
ENSMUSG00000031299	18597	Pdha1	24297.1	-0.12816	0.0498179	2.57258	0.0100944	0.0965924
ENSMUSG00000040118	12293	Cacna2d1	2080.28	-0.247296	0.09613	2.57251	0.0100963	0.0965924
ENSMUSG00000025534	110006	Gusb	1092.09	0.209034	0.0812499	-2.57273	0.0100901	0.0965924
ENSMUSG00000042254	214425	Cilp	121.967	0.376253	0.146255	-2.57258	0.0100942	0.0965924
ENSMUSG00000045252	232976	Zfp574	543.789	-0.21305	0.0828438	2.57171	0.0101199	0.0967547
ENSMUSG00000022175	65107	Lrp10	2938.34	0.146725	0.0570906	-2.57004	0.0101687	0.0971578
ENSMUSG00000022103	14586	Gfra2	125.863	0.3329	0.129601	-2.56865	0.0102096	0.0974857
ENSMUSG00000022382	22422	Wnt7b	16.9198	0.354454	0.138029	-2.56797	0.0102296	0.0976125
ENSMUSG00000029267	17765	Mtf2	383.059	-0.243243	0.0947649	2.5668	0.0102641	0.0978147
ENSMUSG00000052751	58887	Repin1	701.364	-0.208669	0.081291	2.56694	0.0102601	0.0978147
ENSMUSG00000024175	71840	Tekt4	12.8542	-0.326031	0.12709	2.56535	0.0103071	0.0981611
ENSMUSG00000052135	329934	Foxo6	363.65	0.306813	0.119624	-2.56481	0.0103231	0.09825
ENSMUSG00000003402	19089	Prkcsh	2432.15	0.144917	0.0565155	-2.5642	0.0103414	0.0982972
ENSMUSG00000052397	22350	Ezr	3382.07	0.230091	0.0897302	-2.56425	0.0103399	0.0982972
ENSMUSG00000053626	21892	Tll1	237.426	0.286807	0.111862	-2.56393	0.0103494	0.0983089
ENSMUSG00000027452	68738	Acss1	5991.64	-0.188464	0.0735262	2.56322	0.0103707	0.0983389
ENSMUSG00000062981	67270	Mrpl42	3398.92	0.185319	0.072301	-2.56316	0.0103724	0.0983389
ENSMUSG00000026879	227753	Gsn	161678	0.216168	0.0843366	-2.56315	0.0103726	0.0983389
ENSMUSG00000075040	381410	Zfp408	261.159	-0.239733	0.0936116	2.56093	0.0104391	0.098774
ENSMUSG00000028035	67035	Dnajb4	4213.24	0.248656	0.0970915	-2.56105	0.0104355	0.098774
ENSMUSG00000017009	20971	Sdc4	1751.33	0.192238	0.0750782	-2.56051	0.010452	0.098774
ENSMUSG00000026466	208263	Tor1aip1	5331.01	-0.122168	0.0477059	2.56086	0.0104412	0.098774
ENSMUSG00000039911	74646	Spsb1	2247.83	-0.139056	0.0543081	2.5605	0.0104521	0.098774
ENSMUSG00000024725	20409	Ostf1	1123.35	0.176109	0.0688021	-2.55965	0.0104778	0.0989537
ENSMUSG00000036745	70892	Ttll7	265.243	-0.306634	0.119812	2.5593	0.0104884	0.0989895
ENSMUSG00000001419	17261	Mef2d	3407.65	-0.164444	0.0642671	2.55876	0.0105046	0.0990793
ENSMUSG00000047832	71963	Cdca4	246.849	-0.264705	0.103462	2.55848	0.0105131	0.0990955
ENSMUSG00000039810	103284	Zc3h10	377.245	0.22833	0.0892532	-2.55823	0.0105207	0.0991039
ENSMUSG00000002489	21844	Tiam1	344.598	0.225833	0.0882916	-2.5578	0.0105336	0.0991617
ENSMUSG00000036356	234356	Csgalnact1	736.277	0.184159	0.0720538	-2.55585	0.0105928	0.0996551
ENSMUSG00000004508	14389	Gab2	1739.55	0.206311	0.0807606	-2.5546	0.0106309	0.0997353
ENSMUSG00000001665	103140	Gstt3	248.551	0.261722	0.102451	-2.55461	0.0106306	0.0997353
ENSMUSG00000028757	13200	Ddost	3987.99	0.168964	0.0661449	-2.55446	0.0106353	0.0997353
ENSMUSG00000020580	19878	Rock2	7452.9	-0.192729	0.0754271	2.55517	0.0106137	0.0997353
ENSMUSG00000026205	22626	Slc23a3	59.1127	0.375693	0.147168	-2.55282	0.0106854	0.100142
ENSMUSG00000054003	74691	Tdrd9	77.5088	-0.355206	0.139201	2.55175	0.0107183	0.100224
ENSMUSG00000034998	14236	Foxn2	403.351	-0.222355	0.0871418	2.55165	0.0107215	0.100224
ENSMUSG00000051343	52055	Rab11fip5	3504.47	-0.146604	0.0574454	2.55205	0.0107091	0.100224
ENSMUSG00000029071	13542	Dvl1	1912.25	-0.149536	0.0585888	2.55229	0.0107017	0.100224
ENSMUSG00000027339	215653	Rassf2	1036.52	0.23858	0.0935453	-2.55042	0.0107593	0.100514
ENSMUSG00000075254	77446	Heg1	6491.39	-0.210582	0.0826109	2.54909	0.0108006	0.100726
ENSMUSG00000032525	18087	Nktr	2965.53	-0.168318	0.0660515	2.54828	0.0108257	0.100726
ENSMUSG00000030987	20866	Stim1	933.227	0.177971	0.0698465	-2.54803	0.0108334	0.100726
ENSMUSG00000025241	17281	Fyco1	15194.6	-0.180899	0.070999	2.54791	0.0108369	0.100726
ENSMUSG00000026566	68481	Mpzl1	843.234	0.186563	0.0731829	-2.54927	0.0107948	0.100726
ENSMUSG00000056130	225471	Ticam2	48.7283	0.375265	0.147283	-2.54791	0.0108369	0.100726
ENSMUSG00000022808	69150	Snx4	829.372	-0.178127	0.0699688	2.54581	0.0109025	0.10126
ENSMUSG00000046139	225929	Patl1	1511.58	-0.161469	0.0634298	2.54563	0.0109081	0.10126
ENSMUSG00000023011	72393	Faim2	70.2739	0.371968	0.146137	-2.54533	0.0109173	0.101282
ENSMUSG00000004451	64143	Ralb	768.907	0.180465	0.0709173	-2.54473	0.0109363	0.101393
ENSMUSG00000053024	21367	Cntn2	350.589	0.329646	0.129609	-2.54339	0.0109782	0.101718
ENSMUSG00000038623	107769	Tm6sf1	195.189	0.26624	0.104732	-2.5421	0.0110189	0.102031
ENSMUSG00000074682	67917	Zcchc3	488.228	-0.245387	0.0965645	2.54117	0.0110483	0.102174
ENSMUSG00000069041	73333	Slc25a31	13.9138	0.345205	0.135843	-2.5412	0.0110472	0.102174
ENSMUSG00000030659	53322	Nucb2	510.609	0.231599	0.0911787	-2.54006	0.0110834	0.102434
ENSMUSG00000033576	71939	Apol6	36.4414	-0.363828	0.143312	2.53872	0.0111258	0.102642
ENSMUSG00000043384	67298	Gprasp1	2163.99	-0.200845	0.0791137	2.53869	0.0111268	0.102642
ENSMUSG00000021678	14063	F2rl1	40.4205	-0.373523	0.147123	2.53885	0.0111217	0.102642
ENSMUSG00000025823	12304	Pdia4	2330.1	0.203739	0.0802714	-2.53813	0.0111446	0.102742
ENSMUSG00000044894	22272	Uqcrq	7505.49	0.125047	0.0493372	-2.53455	0.0112592	0.103668
ENSMUSG00000021577	66945	Sdha	30266	-0.130166	0.0514034	2.53224	0.0113337	0.104288
ENSMUSG00000028456	22249	Unc13b	3231.06	-0.164762	0.0650887	2.53134	0.0113626	0.104489
ENSMUSG00000034205	94352	Loxl2	491.785	0.272073	0.10751	-2.53067	0.0113844	0.104624
ENSMUSG00000020423	12227	Btg2	6144.13	0.311315	0.123162	-2.5277	0.0114813	0.105322
ENSMUSG00000050555	76832	Hyls1	66.6211	-0.346721	0.13717	2.52768	0.0114819	0.105322
ENSMUSG00000037972	20621	Snn	1412.46	0.199347	0.0788583	-2.52791	0.0114743	0.105322
ENSMUSG00000020131	18551	Pcsk4	38.7824	-0.377068	0.149234	2.52669	0.0115143	0.105493
ENSMUSG00000023328	11423	Ache	272.925	-0.32155	0.127262	2.52667	0.0115148	0.105493
ENSMUSG00000022687	117606	Boc	496.108	0.269439	0.106669	-2.52593	0.0115393	0.105651
ENSMUSG00000050552	66096	0910001L09Rik	800.849	0.181445	0.0718959	-2.52372	0.0116119	0.10625
ENSMUSG00000019235	238323	Rps6kl1	102.886	-0.347851	0.137872	2.523	0.0116358	0.106402
ENSMUSG00000002908	84036	Kcnn1	390.934	0.22743	0.0901644	-2.52239	0.0116561	0.106521
ENSMUSG00000070561	16514	Kcnj11	6932.74	-0.168283	0.066737	2.52159	0.0116827	0.106698
ENSMUSG00000029650	71706	Slc46a3	352.762	0.23222	0.0921017	-2.52134	0.0116909	0.106707
ENSMUSG00000034525	218333	BC018507	2781.54	-0.140991	0.0559389	2.52046	0.0117203	0.106861
ENSMUSG00000028673	71665	Fuca1	1089.19	0.164388	0.0652288	-2.52018	0.0117296	0.106861
ENSMUSG00000021622	76722	Ckmt2	38568.9	0.152789	0.0606219	-2.52036	0.0117236	0.106861
ENSMUSG00000046807	192734	AI646023	348.727	-0.239837	0.0953131	2.5163	0.0118594	0.107377
ENSMUSG00000031840	19339	Rab3a	2665.45	0.126645	0.0502916	-2.51821	0.0117952	0.107377
ENSMUSG00000039063	67856	Echdc3	836.693	-0.240026	0.095383	2.51644	0.0118547	0.107377
ENSMUSG00000027642	20014	Rpn2	3573.92	0.147482	0.0586035	-2.51661	0.011849	0.107377
ENSMUSG00000018849	211652	Wwc1	153.415	0.353969	0.140636	-2.51692	0.0118387	0.107377
ENSMUSG00000025932	14048	Eya1	94.3279	0.341552	0.135676	-2.51741	0.011822	0.107377
ENSMUSG00000018585	11927	Atox1	702.732	0.208312	0.0827562	-2.51718	0.0118298	0.107377
ENSMUSG00000035934	208076	Pknox2	453.061	0.206053	0.0818748	-2.51668	0.0118465	0.107377
ENSMUSG00000043323	381668	Fbrsl1	1144.83	-0.176061	0.0699229	2.51792	0.0118049	0.107377
ENSMUSG00000036985	208884	Zdhhc9	1658.97	-0.141785	0.0563273	2.51716	0.0118305	0.107377
ENSMUSG00000072258	21339	CAAA01083517.1.42631.2	699.709	-0.196454	0.0781103	2.51508	0.0119006	0.107684
ENSMUSG00000021010	27386	Npas3	16.4879	0.354375	0.14094	-2.51436	0.0119247	0.107836
ENSMUSG00000033948	74464	Zswim5	59.4561	0.351839	0.139946	-2.5141	0.0119337	0.107851
ENSMUSG00000003153	20527	Slc2a3	106.821	-0.34837	0.138624	2.51306	0.011969	0.108103
ENSMUSG00000026836	11477	Acvr1	1405.41	0.182875	0.0728653	-2.50978	0.0120808	0.109046
ENSMUSG00000025408	13198	Ddit3	859.556	-0.179346	0.0714969	2.50844	0.0121266	0.109392
ENSMUSG00000040710	20452	St8sia4	188.16	0.348213	0.138848	-2.50787	0.0121463	0.109436
ENSMUSG00000027808	28146	Serp1	1369.34	0.203323	0.0810677	-2.50807	0.0121393	0.109436
ENSMUSG00000026114	12790	Cnga3	12.1494	-0.328598	0.131053	2.50737	0.0121632	0.109521
ENSMUSG00000026203	56812	Dnajb2	3411.19	-0.167502	0.0668835	2.50439	0.0122663	0.110381
ENSMUSG00000026458	68507	Ppfia4	172.991	-0.313914	0.125388	2.50353	0.012296	0.110582
ENSMUSG00000028478	12757	Clta	2105.5	0.164214	0.0656493	-2.50139	0.0123708	0.111186
ENSMUSG00000029027	13368	Dffb	166.645	-0.311822	0.124704	2.50051	0.0124016	0.111395
ENSMUSG00000049537	243078	Tecrl	1103.58	-0.262651	0.105131	2.49833	0.012478	0.112012
ENSMUSG00000031697	56452	Orc6	170.175	0.277757	0.111191	-2.49801	0.0124891	0.112044
ENSMUSG00000034949	103406	Zfr2	228.165	-0.262236	0.10505	2.49631	0.0125494	0.112447
ENSMUSG00000041219	228482	Arhgap11a	105.376	0.31417	0.125853	-2.49632	0.0125488	0.112447
ENSMUSG00000032089	16154	Il10ra	151.904	0.309946	0.124188	-2.49578	0.0125682	0.112452
ENSMUSG00000059049	329872	Frem1	44.2915	0.368084	0.147492	-2.49562	0.0125737	0.112452
ENSMUSG00000031465	11601	Angpt2	358.212	0.228114	0.0914072	-2.49558	0.0125753	0.112452
ENSMUSG00000057375	230584	Yipf1	574.546	0.215595	0.0864136	-2.49491	0.0125988	0.112547
ENSMUSG00000028613	16975	Lrp8	363.677	-0.308639	0.123808	2.49288	0.0126713	0.113032
ENSMUSG00000020059	20962	Sycp3	238.923	-0.285943	0.11471	2.49274	0.0126761	0.113032
ENSMUSG00000038174	213056	Fam126b	427.828	-0.236785	0.0949817	2.49295	0.0126685	0.113032
ENSMUSG00000030844	67865	Rgs10	205.296	0.30795	0.123585	-2.49181	0.0127094	0.113259
ENSMUSG00000050890	230809	Pdik1l	219.888	-0.267585	0.107431	2.49075	0.0127475	0.11353
ENSMUSG00000001089	269593	Luzp1	3210.74	-0.143528	0.0576334	2.49036	0.0127613	0.113584
ENSMUSG00000052384	224109	Lrrc33	355.516	0.288079	0.115704	-2.48979	0.0127818	0.113675
ENSMUSG00000055172	50909	C1ra	1157.77	0.252851	0.101561	-2.48965	0.012787	0.113675
ENSMUSG00000048126	12835	Col6a3	2719.37	0.348005	0.139872	-2.48802	0.0128457	0.114128
ENSMUSG00000002799	16450	Jag2	1128.46	-0.209389	0.0841818	2.48735	0.01287	0.114204
ENSMUSG00000055296	242474	D730040F13Rik	1516.05	-0.202246	0.0813119	2.48729	0.0128722	0.114204
ENSMUSG00000029521	50883	Chek2	144.203	0.300639	0.120877	-2.48714	0.0128776	0.114204
ENSMUSG00000019647	20358	Sema6a	1040.51	0.240334	0.0966546	-2.48653	0.0128997	0.114331
ENSMUSG00000053110	22601	Yap1	4740.48	-0.149161	0.0600008	2.48599	0.0129191	0.114434
ENSMUSG00000020733	26941	Slc9a3r1	601.521	0.298837	0.120235	-2.48544	0.0129391	0.114542
ENSMUSG00000039633	244421	Lonrf1	601.397	0.317196	0.127637	-2.48513	0.0129503	0.114572
ENSMUSG00000031558	20563	Slit2	732.511	0.201051	0.0809283	-2.48431	0.0129805	0.114702
ENSMUSG00000034154	68142	Ino80	1025.45	-0.185814	0.0747951	2.4843	0.0129806	0.114702
ENSMUSG00000025723	68039	Nmb	36.3293	0.370866	0.149316	-2.48377	0.0129999	0.114804
ENSMUSG00000054843	226255	Atrnl1	2043.3	0.175043	0.0705143	-2.48238	0.0130508	0.115115
ENSMUSG00000034361	234577	Cpne2	231.228	0.276754	0.111485	-2.48244	0.0130486	0.115115
ENSMUSG00000043154	235542	Ppp2r3a	17243.7	-0.171095	0.0689428	2.4817	0.0130758	0.115197
ENSMUSG00000027070	14725	Lrp2	483.255	0.368697	0.148558	-2.48184	0.0130707	0.115197
ENSMUSG00000038034	140559	Igsf8	774.843	0.234569	0.0946765	-2.47758	0.0132275	0.116394
ENSMUSG00000027878	18129	Notch2	2982.34	-0.156213	0.0630476	2.4777	0.0132233	0.116394
ENSMUSG00000039239	21808	Tgfb2	879.206	-0.271433	0.109568	2.4773	0.0132382	0.116418
ENSMUSG00000074802	237436	Gas2l3	134.657	-0.342349	0.138217	2.4769	0.013253	0.116479
ENSMUSG00000080316	75202	Ncrna00085	151.204	-0.308691	0.124646	2.47653	0.0132667	0.116529
ENSMUSG00000005299	56384	Letm1	3220.14	0.13099	0.0529148	-2.47548	0.0133058	0.116664
ENSMUSG00000031665	58198	Sall1	543.381	-0.225451	0.0910588	2.47588	0.0132907	0.116664
ENSMUSG00000042804	100129	Gpr153	1819.5	0.233992	0.0945194	-2.4756	0.0133013	0.116664
ENSMUSG00000062619	67101	2310039H08Rik	309.468	0.20993	0.0848626	-2.47376	0.0133699	0.117156
ENSMUSG00000003665	15116	Has1	55.5071	0.366456	0.148178	-2.47308	0.0133952	0.117308
ENSMUSG00000041268	235380	Dmxl2	1072.22	-0.199163	0.080557	2.47233	0.0134237	0.117487
ENSMUSG00000078234	242721	Klhdc7a	158.172	-0.353589	0.143052	2.47174	0.0134456	0.117609
ENSMUSG00000019899	16773	Lama2	8017.28	0.164003	0.0663589	-2.47145	0.0134567	0.117636
ENSMUSG00000020612	19084	Prkar1a	16135.1	-0.139	0.0562536	2.47096	0.0134751	0.117657
ENSMUSG00000062694	12391	Cav3	1291.67	0.175382	0.0709978	-2.47024	0.0135022	0.117824
ENSMUSG00000028312	14211	Smc2	236.567	0.274982	0.111365	-2.4692	0.0135414	0.118096
ENSMUSG00000037904	74251	Ankrd9	729.447	0.233184	0.0944643	-2.46849	0.0135684	0.118261
ENSMUSG00000050556	16500	Kcnb1	2064.53	-0.176014	0.0713117	2.46824	0.0135778	0.118264
ENSMUSG00000021823	22330	Vcl	7216.85	-0.133798	0.0542121	2.46806	0.0135849	0.118264
ENSMUSG00000029762	14187	Akr1b8	720.404	0.272812	0.110595	-2.46677	0.0136337	0.118619
ENSMUSG00000069237	97863	C78339	574.696	-0.188189	0.0763497	2.46482	0.013708	0.119195
ENSMUSG00000060791	100040018	Gmfg	54.3793	0.359824	0.146031	-2.46402	0.0137388	0.119392
ENSMUSG00000065954	320165	Tacc1	4748.42	-0.115345	0.0468213	2.46351	0.0137583	0.119491
ENSMUSG00000019087	54411	Atp6ap1	5373.87	0.139314	0.0565607	-2.46308	0.0137748	0.119564
ENSMUSG00000021943	14560	Gdf10	80.0175	0.348223	0.141391	-2.46283	0.0137846	0.119577
ENSMUSG00000032046	76192	Abhd12	1712.17	0.138442	0.0562208	-2.46247	0.0137982	0.119625
ENSMUSG00000050666	320736	E130203B14Rik	587.918	0.256658	0.104308	-2.46057	0.0138716	0.120191
ENSMUSG00000044337	12778	Cxcr7	2864.27	-0.154354	0.0627781	2.45872	0.0139432	0.120668
ENSMUSG00000031872	65115	Bean1	65.0612	-0.348569	0.141792	2.45831	0.0139592	0.120727
ENSMUSG00000047945	17357	Marcksl1	181.45	0.31216	0.127002	-2.45792	0.0139746	0.120727
ENSMUSG00000026532	20739	Spna1	315.375	0.27129	0.110366	-2.4581	0.0139674	0.120727
ENSMUSG00000079020	106068	Slc45a4	808.557	0.178813	0.072788	-2.45663	0.0140246	0.12099
ENSMUSG00000060961	54403	Slc4a4	1301.54	-0.185536	0.0755285	2.4565	0.0140297	0.12099
ENSMUSG00000091166	226654	Tstd1	18.2697	-0.353928	0.144095	2.45622	0.0140409	0.121015
ENSMUSG00000040170	55990	Fmo2	2440.66	0.255755	0.104188	-2.45474	0.0140987	0.121442
ENSMUSG00000041740	50849	Rnf10	15586.7	0.101103	0.0412065	-2.45358	0.0141442	0.121743
ENSMUSG00000049265	16527	Kcnk3	20206.1	-0.131911	0.0537659	2.45343	0.0141502	0.121743
ENSMUSG00000036565	78339	Ttyh3	874.676	0.213088	0.0868691	-2.45298	0.0141679	0.121824
ENSMUSG00000024742	14156	Fen1	191.373	0.259594	0.105859	-2.45227	0.0141956	0.121921
ENSMUSG00000048065	320635	Cyb5r2	480.651	-0.263535	0.107475	2.45206	0.014204	0.121921
ENSMUSG00000035692	100038882	Isg15	69.6804	0.351824	0.14347	-2.45225	0.0141967	0.121921
ENSMUSG00000022897	13548	Dyrk1a	3052.31	-0.148267	0.0604747	2.45172	0.0142177	0.12196
ENSMUSG00000028580	80912	Pum1	2788.61	-0.114176	0.0465734	2.45152	0.0142253	0.12196
ENSMUSG00000019891	66686	Dcbld1	112.644	0.290107	0.118404	-2.45015	0.0142796	0.122355
ENSMUSG00000029366	13178	Dck	182.903	0.255977	0.104487	-2.44985	0.0142916	0.122387
ENSMUSG00000031737	54352	Irx5	66.5828	-0.349056	0.142496	2.44958	0.0143023	0.122407
ENSMUSG00000029624	71799	Ptcd1	633.192	0.204905	0.0837069	-2.44788	0.0143698	0.122913
ENSMUSG00000042213	67492	Anubl1	109.876	-0.334715	0.136866	2.44556	0.0144626	0.123562
ENSMUSG00000023019	14555	Gpd1	1860.44	-0.33998	0.139017	2.4456	0.0144611	0.123562
ENSMUSG00000047881	100532	Rell1	507.64	0.200495	0.0819984	-2.4451	0.014481	0.123576
ENSMUSG00000026029	12370	Casp8	292.151	0.280079	0.114546	-2.44512	0.0144805	0.123576
ENSMUSG00000045667	276829	Smtnl2	1662.51	0.206112	0.0843973	-2.44216	0.0145995	0.124515
ENSMUSG00000028680	12795	Plk3	213.181	0.313615	0.128433	-2.44186	0.0146118	0.124547
ENSMUSG00000047798	246746	Cd300lf	18.6537	0.353185	0.14473	-2.44031	0.0146747	0.125012
ENSMUSG00000032280	21887	Tle3	1745.06	0.175905	0.0721062	-2.43953	0.0147062	0.125207
ENSMUSG00000029228	16924	Lnx1	264.398	0.244581	0.100274	-2.43914	0.0147223	0.125272
ENSMUSG00000049999	228966	Ppp1r3d	524.142	-0.213868	0.0877605	2.43696	0.0148115	0.125885
ENSMUSG00000004661	56380	Arid3b	138.544	0.295978	0.121451	-2.43702	0.0148088	0.125885
ENSMUSG00000025868	67044	Higd2a	2080.57	0.125402	0.0514838	-2.43575	0.014861	0.126232
ENSMUSG00000031517	234267	Gpm6a	2295.12	0.192469	0.0790342	-2.43526	0.0148812	0.126275
ENSMUSG00000048865	226652	Arhgap30	227.101	0.30741	0.126246	-2.435	0.0148918	0.126275
ENSMUSG00000043740	320148	B430306N03Rik	64.2328	0.355924	0.146168	-2.43503	0.0148906	0.126275
ENSMUSG00000068697	59011	Myoz1	14.9826	0.342158	0.140598	-2.43358	0.0149503	0.126698
ENSMUSG00000019936	13516	Epyc	73.2391	0.356001	0.146299	-2.43337	0.0149591	0.126699
ENSMUSG00000028687	70603	Mutyh	71.3622	-0.329969	0.135631	2.43285	0.0149806	0.126809
ENSMUSG00000020456	18293	Ogdh	62799.9	-0.133268	0.0547976	2.432	0.0150158	0.127033
ENSMUSG00000036218	239618	Pdzrn4	396.937	-0.262531	0.108027	2.43023	0.015089	0.12758
ENSMUSG00000022799	12549	Arhgap31	10595.7	-0.15594	0.0641983	2.42903	0.0151391	0.127877
ENSMUSG00000001670	234724	Tat	347.445	0.357974	0.147389	-2.42876	0.0151504	0.127877
ENSMUSG00000026398	26424	Nr5a2	38.8317	0.362704	0.149329	-2.42889	0.0151453	0.127877
ENSMUSG00000029767	12321	Calu	16853.3	0.111153	0.0457795	-2.42801	0.015182	0.128071
ENSMUSG00000026482	19731	Rgl1	2426.49	0.124616	0.051334	-2.42756	0.0152009	0.128097
ENSMUSG00000021904	218877	Sema3g	583.252	-0.234488	0.0965959	2.42752	0.0152026	0.128097
ENSMUSG00000044468	74645	Fam46c	183.844	0.348675	0.143713	-2.42618	0.0152586	0.128495
ENSMUSG00000043631	407800	Ecm2	1517.18	0.204775	0.0844131	-2.42587	0.0152719	0.128534
ENSMUSG00000028464	22004	Tpm2	8713.31	-0.193906	0.0799864	2.42424	0.0153403	0.129036
ENSMUSG00000006050	24068	Sra1	1587.25	0.171076	0.0706083	-2.42288	0.0153979	0.129446
ENSMUSG00000026672	71648	Optn	1885.61	-0.179221	0.0740155	2.42139	0.0154612	0.129653
ENSMUSG00000023104	19718	Rfc2	560.257	0.18374	0.0758932	-2.42103	0.0154766	0.129653
ENSMUSG00000028514	329908	Usp24	5864.18	-0.149566	0.0617793	2.42097	0.0154792	0.129653
ENSMUSG00000075569	75136	Rsph10b2	29.5265	-0.361122	0.149172	2.42085	0.0154842	0.129653
ENSMUSG00000030894	12751	Tpp1	3382.11	0.12909	0.0533184	-2.42111	0.0154732	0.129653
ENSMUSG00000015747	22365	Vps45	273.556	0.240255	0.0991983	-2.42196	0.0154369	0.129653
ENSMUSG00000038663	244091	Fsd2	12166	-0.132657	0.0547803	2.42162	0.0154514	0.129653
ENSMUSG00000073940	100503605	Hbb-b2	663.721	0.291619	0.120488	-2.42031	0.0155073	0.129772
ENSMUSG00000052305	100503605	Hbb-b1	663.721	0.291619	0.120488	-2.42031	0.0155073	0.129772
ENSMUSG00000038290	103677	Smg6	1739.87	-0.129056	0.0533381	2.41958	0.0155386	0.12996
ENSMUSG00000020422	319939	Tns3	3323.02	0.199598	0.0825185	-2.41883	0.0155704	0.130004
ENSMUSG00000048000	227331	Gigyf2	1863.39	-0.140844	0.0582204	2.41915	0.015557	0.130004
ENSMUSG00000017718	71562	Afmid	538.479	-0.177635	0.0734329	2.41901	0.0155626	0.130004
ENSMUSG00000004707	17085	Ly9	30.249	0.345715	0.142945	-2.41852	0.015584	0.130044
ENSMUSG00000005973	19672	Rcn1	2118.7	0.135907	0.0562043	-2.4181	0.0156019	0.130119
ENSMUSG00000028270	14469	Gbp2	1842.52	0.243197	0.100598	-2.41752	0.0156268	0.130179
ENSMUSG00000056071	20202	S100a9	12.5432	-0.300664	0.124359	2.41771	0.0156184	0.130179
ENSMUSG00000028195	16007	Cyr61	5723.08	0.300809	0.124504	-2.41605	0.0156899	0.130439
ENSMUSG00000026062	226999	Slc9a2	606.334	-0.194683	0.0805955	2.41555	0.0157113	0.130439
ENSMUSG00000039616	68591	Mocos	167.371	-0.259558	0.107442	2.4158	0.0157005	0.130439
ENSMUSG00000090262	17527	Mpv17	1947.28	-0.134291	0.0555937	2.41559	0.0157098	0.130439
ENSMUSG00000043110	320974	Lrrn4	1507.6	0.342559	0.141791	-2.41595	0.0156941	0.130439
ENSMUSG00000044364	108832	5430405G05Rik	76.7819	-0.318222	0.131781	2.41479	0.0157443	0.130492
ENSMUSG00000009585	80287	Apobec3	286.855	0.232784	0.0963931	-2.41494	0.0157376	0.130492
ENSMUSG00000020897	20877	Aurkb	15.6866	0.306767	0.127029	-2.41494	0.0157376	0.130492
ENSMUSG00000015745	67220	Plekho1	1728.11	-0.22417	0.0928882	2.41334	0.0158072	0.13094
ENSMUSG00000054387	17248	Mdm4	764.418	-0.204345	0.084698	2.41263	0.0158377	0.131044
ENSMUSG00000045733	212518	Sprn	70.0861	0.354622	0.146978	-2.41276	0.0158322	0.131044
ENSMUSG00000036093	75423	Arl5a	2991.45	-0.195924	0.0812313	2.41193	0.0158685	0.131053
ENSMUSG00000038895	319601	Zfp653	173.169	-0.272213	0.112861	2.41193	0.0158684	0.131053
ENSMUSG00000025499	15461	Hras1	1170.8	0.165235	0.0685114	-2.41179	0.0158744	0.131053
ENSMUSG00000022414	66513	Tab1	701.584	-0.208241	0.0863624	2.41124	0.0158982	0.131111
ENSMUSG00000055436	69207	Srsf11	1881.82	-0.14344	0.0594952	2.41096	0.0159107	0.131126
ENSMUSG00000038248	109205	Sobp	339.758	0.24658	0.102293	-2.41052	0.0159297	0.131126
ENSMUSG00000006642	69852	Tcf23	35.2615	-0.359908	0.149304	2.41058	0.0159273	0.131126
ENSMUSG00000045594	12091	Glb1	1091.69	0.177359	0.0735819	-2.41036	0.0159368	0.131126
ENSMUSG00000040048	68342	Ndufb10	12637.5	0.133848	0.0555601	-2.40907	0.0159931	0.131442
ENSMUSG00000026788	71834	Zbtb43	692.218	-0.16552	0.0687046	2.40916	0.0159894	0.131442
ENSMUSG00000032826	109676	Ank2	5911.88	-0.134173	0.0557108	2.40838	0.0160235	0.131567
ENSMUSG00000024589	83814	Nedd4l	2568.53	-0.150325	0.0624192	2.40832	0.0160262	0.131567
ENSMUSG00000028436	68970	Dcaf12	1430.35	0.169657	0.0704769	-2.40727	0.0160722	0.131797
ENSMUSG00000061887	72475	Ssbp3	2081.01	0.126328	0.0524747	-2.40741	0.0160662	0.131797
ENSMUSG00000067071	55927	Hes6	352.031	0.236335	0.0982057	-2.40653	0.0161048	0.131918
ENSMUSG00000042817	14255	Flt3	13.5695	-0.337228	0.140125	2.40663	0.0161006	0.131918
ENSMUSG00000029313	17355	Aff1	3687.83	-0.158494	0.0658713	2.40612	0.0161229	0.131992
ENSMUSG00000039629	320609	Fam40b	3242.97	-0.146932	0.0610724	2.40587	0.0161342	0.132011
ENSMUSG00000056602	320365	Fry	6906.53	-0.222411	0.0924619	2.40544	0.016153	0.132092
ENSMUSG00000046688	211550	Tifa	151.039	0.26404	0.10978	-2.40518	0.0161647	0.132114
ENSMUSG00000047731	226178	D19Wsu162e	3841.77	-0.120773	0.0502419	2.40383	0.0162244	0.132528
ENSMUSG00000032375	208117	Aph1b	197.212	0.250828	0.104439	-2.40167	0.0163206	0.13324
ENSMUSG00000068745	68753	Mybphl	33211.2	-0.170882	0.0711621	2.4013	0.0163368	0.133297
ENSMUSG00000050708	14325	Ftl1	845.293	0.26993	0.11242	-2.40108	0.0163466	0.133304
ENSMUSG00000062382	14325	Gm10116	845.293	0.26993	0.11242	-2.40108	0.0163466	0.133304
ENSMUSG00000030671	18576	Pde3b	743.455	-0.219714	0.0915152	2.40084	0.0163574	0.133317
ENSMUSG00000018796	14081	Acsl1	20983.1	-0.229122	0.0954696	2.39995	0.0163975	0.133561
ENSMUSG00000029729	74570	Zkscan1	1194.59	-0.151987	0.0633394	2.39957	0.0164145	0.133561
ENSMUSG00000038398	67031	Upf3a	582.031	0.173529	0.0723118	-2.39974	0.0164069	0.133561
ENSMUSG00000027318	110751	Adam33	306.469	0.233426	0.0973537	-2.39771	0.0164981	0.134167
ENSMUSG00000025355	58223	Mmp19	223.38	0.272036	0.113557	-2.39559	0.0165937	0.13487
ENSMUSG00000056870	70676	Gulp1	191.931	0.26866	0.112204	-2.39439	0.0166482	0.135238
ENSMUSG00000030272	52163	Camk1	1746.53	0.126492	0.0528468	-2.39356	0.0166857	0.135468
ENSMUSG00000017418	75869	Arl5b	379.374	0.25082	0.104803	-2.39326	0.0166994	0.135504
ENSMUSG00000024451	106952	Arap3	2158.89	-0.128451	0.0537224	2.39101	0.0168021	0.136187
ENSMUSG00000022853	74147	Ehhadh	216.349	-0.246608	0.103157	2.39061	0.0168202	0.136259
ENSMUSG00000026321	21934	Tnfrsf11a	69.36	0.33505	0.140195	-2.38989	0.0168534	0.136377
ENSMUSG00000034573	19249	Ptpn13	1038.58	0.168753	0.0706368	-2.38902	0.0168932	0.136624
ENSMUSG00000035062	245522	Zc4h2	94.4352	0.309659	0.12963	-2.38879	0.016904	0.136636
ENSMUSG00000017756	20499	Slc12a7	4673.91	-0.174821	0.0731951	2.38842	0.0169208	0.136697
ENSMUSG00000034235	78787	Usp54	1700.78	-0.189157	0.0792115	2.38799	0.0169406	0.136781
ENSMUSG00000040584	18671	Abcb1a	425.996	-0.251572	0.105363	2.38767	0.0169556	0.136827
ENSMUSG00000022517	17237	Mgrn1	12877.5	-0.130672	0.0547348	2.38736	0.0169699	0.136868
ENSMUSG00000025078	66866	Nhlrc2	735.048	-0.175583	0.073559	2.38697	0.016988	0.136938
ENSMUSG00000030237	28250	Slco1a4	48.8334	0.350658	0.146936	-2.38647	0.0170108	0.137047
ENSMUSG00000021477	13039	Ctsl	8503.4	0.168608	0.0706627	-2.38609	0.0170284	0.137114
ENSMUSG00000070304	72821	Scn2b	64.0649	0.341836	0.143309	-2.38531	0.0170648	0.137144
ENSMUSG00000040446	225283	Rprd1a	717.324	-0.168107	0.0704708	2.38548	0.0170568	0.137144
ENSMUSG00000035873	114774	Pawr	252.336	0.264764	0.111003	-2.38521	0.0170695	0.137144
ENSMUSG00000027330	12531	Cdc25b	374.495	-0.263142	0.110311	2.38545	0.0170581	0.137144
ENSMUSG00000031982	68865	Arv1	82.1057	-0.31741	0.133108	2.38459	0.017098	0.137223
ENSMUSG00000060376	12039	Bckdha	3098.62	-0.137052	0.057472	2.38468	0.0170938	0.137223
ENSMUSG00000027253	228357	Lrp4	1301.12	0.187325	0.0786409	-2.38202	0.0172178	0.138109
ENSMUSG00000052613	11994	Pcdh15	259.161	0.292041	0.122673	-2.38065	0.0172819	0.138472
ENSMUSG00000021265	214663	Slc25a29	393.022	0.28977	0.12177	-2.37964	0.0173294	0.138475
ENSMUSG00000024235	26410	Map3k8	116.471	-0.293353	0.123255	2.38005	0.0173103	0.138475
ENSMUSG00000039697	211329	Ncoa7	133.633	0.270408	0.11362	-2.37994	0.0173156	0.138475
ENSMUSG00000028737	212647	Aldh4a1	2404.85	-0.142595	0.059918	2.37983	0.0173206	0.138475
ENSMUSG00000033487	319448	Fndc3a	1296.99	0.146246	0.0614387	-2.38036	0.017296	0.138475
ENSMUSG00000018401	170749	Mtmr4	1474.75	0.150414	0.0632232	-2.3791	0.0173552	0.13853
ENSMUSG00000003518	72349	Dusp3	5737.83	-0.129931	0.0546119	2.37917	0.0173515	0.13853
ENSMUSG00000029246	231327	Ppat	1602.26	-0.16369	0.0688255	2.37833	0.0173912	0.138742
ENSMUSG00000015837	18412	Sqstm1	13531.8	-0.13117	0.0551616	2.37792	0.0174106	0.138822
ENSMUSG00000019055	18822	Plod1	4118.41	0.134725	0.0566729	-2.37724	0.0174428	0.139003
ENSMUSG00000047712	338362	Ust	335.955	0.224762	0.0945932	-2.37609	0.0174973	0.139362
ENSMUSG00000027463	69698	Slc52a3	43.4049	-0.344192	0.144889	2.37555	0.0175227	0.139489
ENSMUSG00000021495	212483	Fam193b	1429.05	-0.160871	0.067751	2.37445	0.0175751	0.13983
ENSMUSG00000006576	20536	Slc4a3	9846.58	-0.156694	0.0660094	2.37381	0.0176055	0.139852
ENSMUSG00000034807	234407	Glt25d1	2267.8	0.145684	0.0613632	-2.37413	0.0175906	0.139852
ENSMUSG00000039485	72480	Tspyl4	597.688	-0.170669	0.071897	2.37379	0.0176064	0.139852
ENSMUSG00000003031	12576	Cdkn1b	1502.71	-0.15502	0.0653191	2.37327	0.0176312	0.139974
ENSMUSG00000056938	67131	Acbd4	1296.21	-0.18078	0.076194	2.37262	0.0176624	0.139994
ENSMUSG00000046982	110796	Tshz1	2409.33	-0.139925	0.0589724	2.37272	0.0176576	0.139994
ENSMUSG00000028871	192199	Rspo1	552.173	0.28726	0.121098	-2.37213	0.0176861	0.140106
ENSMUSG00000030615	66271	Tmem126a	1141.53	0.208182	0.0878438	-2.36991	0.0177924	0.140719
ENSMUSG00000000088	12858	Cox5a	13205	0.164648	0.0695033	-2.36892	0.01784	0.140719
ENSMUSG00000024486	15200	Hbegf	436.638	-0.268658	0.113406	2.36898	0.017837	0.140719
ENSMUSG00000001707	66143	Eef1e1	289.585	0.215658	0.0910314	-2.36905	0.0178339	0.140719
ENSMUSG00000034723	52837	Tmx4	5843.65	-0.176624	0.0745538	2.36908	0.0178322	0.140719
ENSMUSG00000025466	69064	1810014F10Rik	1149.34	0.156525	0.0660526	-2.3697	0.0178027	0.140719
ENSMUSG00000025790	108116	Slco3a1	6190.48	0.153927	0.0649482	-2.36999	0.0177886	0.140719
ENSMUSG00000019558	102857	Slc6a8	3488.96	-0.138773	0.0585569	2.36988	0.0177937	0.140719
ENSMUSG00000059355	414077	BC056474	494.242	0.205796	0.0869444	-2.36699	0.0179336	0.141381
ENSMUSG00000019951	75089	Uhrf1bp1l	1061.26	-0.169711	0.0717253	2.36612	0.0179755	0.141558
ENSMUSG00000035759	71769	Bbs10	107.024	-0.294873	0.124633	2.36593	0.0179849	0.141558
ENSMUSG00000031075	101772	Ano1	763.166	0.258246	0.109138	-2.36623	0.0179703	0.141558
ENSMUSG00000021922	16427	Itih4	134.142	-0.346175	0.146331	2.36571	0.0179956	0.141566
ENSMUSG00000027009	16401	Itga4	119.934	0.315054	0.133225	-2.36483	0.0180385	0.141788
ENSMUSG00000022498	106200	Txndc11	967.821	0.187953	0.0794818	-2.36473	0.0180431	0.141788
ENSMUSG00000026395	19264	Ptprc	215.17	0.287657	0.121685	-2.36395	0.0180813	0.141866
ENSMUSG00000029279	114642	Brdt	43.7814	0.349126	0.147669	-2.36424	0.018067	0.141866
ENSMUSG00000040035	214240	Disp2	10.9254	0.242099	0.102414	-2.36394	0.018082	0.141866
ENSMUSG00000027956	70652	Tmem144	1057.01	-0.225492	0.0954077	2.36346	0.0181053	0.141973
ENSMUSG00000054499	67379	Dedd2	388.06	0.25648	0.108556	-2.36264	0.0181451	0.142134
ENSMUSG00000053080	108899	2700081O15Rik	1673.14	0.155072	0.0656562	-2.36188	0.0181825	0.142275
ENSMUSG00000057156	239099	Homez	137.992	-0.286382	0.121252	2.36188	0.0181826	0.142275
ENSMUSG00000028552	13858	Eps15	2312.24	0.14105	0.0597549	-2.36047	0.0182518	0.142741
ENSMUSG00000030352	109246	Tspan9	3338.54	-0.16671	0.0706477	2.35974	0.0182879	0.142947
ENSMUSG00000034209	75668	Rasl10a	52.039	-0.337911	0.143328	2.35761	0.0183928	0.143653
ENSMUSG00000027447	13010	Cst3	5936.85	0.167274	0.0709537	-2.35751	0.0183978	0.143653
ENSMUSG00000035356	80859	Nfkbiz	374.767	-0.290213	0.123143	2.35673	0.0184369	0.143882
ENSMUSG00000014158	63873	Trpv4	191.302	0.282085	0.119708	-2.35645	0.0184506	0.143913
ENSMUSG00000024349	72512	Tmem173	281.171	0.25815	0.109571	-2.35601	0.0184724	0.144006
ENSMUSG00000025395	19075	Prim1	93.348	0.317043	0.134594	-2.35555	0.0184951	0.144051
ENSMUSG00000029860	22793	Zyx	4241.92	0.190302	0.0807903	-2.3555	0.0184977	0.144051
ENSMUSG00000022969	16155	Il10rb	3717.75	-0.116572	0.0495374	2.35321	0.0186122	0.144866
ENSMUSG00000037071	20249	Scd1	9946.12	-0.252825	0.107465	2.35262	0.0186419	0.14502
ENSMUSG00000024827	104174	Gldc	77.9069	0.314109	0.133543	-2.35211	0.0186671	0.145139
ENSMUSG00000034311	16571	Kif4	18.8375	0.312551	0.13293	-2.35124	0.0187111	0.145153
ENSMUSG00000068696	64378	Gpr88	36.9136	0.34772	0.147867	-2.35157	0.0186944	0.145153
ENSMUSG00000038871	12183	Bpgm	978.029	0.350293	0.148992	-2.35109	0.0187183	0.145153
ENSMUSG00000024754	83921	Tmem2	1145.31	0.345169	0.146796	-2.35136	0.018705	0.145153
ENSMUSG00000019789	15214	Hey2	78.7566	-0.328894	0.139918	2.35062	0.0187421	0.145261
ENSMUSG00000041308	20650	Sntb2	766.187	0.255509	0.108787	-2.3487	0.0188391	0.145782
ENSMUSG00000018986	20557	Slfn3	50.2583	-0.347229	0.14784	2.34868	0.01884	0.145782
ENSMUSG00000029922	54484	Mkrn1	898.223	0.25598	0.108997	-2.3485	0.018849	0.145782
ENSMUSG00000024529	16948	Lox	198.253	0.242357	0.103194	-2.34855	0.0188466	0.145782
ENSMUSG00000058145	233332	Adamts17	180.89	0.267572	0.113953	-2.34809	0.0188702	0.145869
ENSMUSG00000002870	17216	Mcm2	223.165	0.262973	0.112018	-2.3476	0.0188947	0.145982
ENSMUSG00000044033	545428	Ccdc141	4284.91	-0.127558	0.0543431	2.34726	0.018912	0.146039
ENSMUSG00000035506	171286	Slc12a8	64.0892	-0.326178	0.139008	2.34646	0.0189525	0.146275
ENSMUSG00000074417	18729	Gm14548	25.7595	0.338188	0.144152	-2.34606	0.0189733	0.146358
ENSMUSG00000089942	18729	Pira2	25.7595	0.338188	0.144152	-2.34606	0.0189733	0.146358
ENSMUSG00000051256	67767	Jagn1	567.724	0.183569	0.0782622	-2.34556	0.0189985	0.146475
ENSMUSG00000030956	77938	Fam53b	1235.68	0.148396	0.0632766	-2.3452	0.0190171	0.146542
ENSMUSG00000048175	78541	Asb8	2463.8	-0.151673	0.0646809	2.34494	0.0190303	0.146567
ENSMUSG00000030166	19365	Rad52	218.419	-0.247987	0.105781	2.34436	0.0190598	0.146718
ENSMUSG00000009394	20965	Syn2	1394.89	-0.228067	0.0972981	2.344	0.0190781	0.146782
ENSMUSG00000046541	210172	Zfp526	359.122	-0.231624	0.098841	2.34339	0.0191092	0.146944
ENSMUSG00000090958	434215	Lrrc32	1355.21	-0.170395	0.0727193	2.34319	0.0191198	0.146949
ENSMUSG00000070565	226525	Rasal2	1258.06	-0.186261	0.0795022	2.34284	0.0191378	0.14701
ENSMUSG00000033220	19354	Rac2	159.464	0.334431	0.142857	-2.34103	0.0192309	0.147494
ENSMUSG00000029718	18542	Pcolce	3088.74	0.236801	0.101151	-2.34107	0.0192286	0.147494
ENSMUSG00000019846	16775	Lama4	6047.6	0.146031	0.062388	-2.3407	0.0192477	0.147546
ENSMUSG00000053441	240322	Adamts19	912.907	-0.158904	0.0679593	2.33823	0.0193754	0.14837
ENSMUSG00000058056	72333	Palld	4380.1	-0.220813	0.0944966	2.33673	0.0194531	0.148887
ENSMUSG00000028601	52430	Echdc2	1120.55	-0.198644	0.0850699	2.33506	0.01954	0.149324
ENSMUSG00000010660	18799	Plcd1	1217.77	-0.212964	0.0912031	2.33505	0.0195407	0.149324
ENSMUSG00000030967	360216	Zranb1	1408.03	-0.150726	0.0645734	2.33417	0.0195866	0.149597
ENSMUSG00000050410	106795	Tcf19	82.8301	0.343087	0.147078	-2.33269	0.0196646	0.150037
ENSMUSG00000024778	14102	Fas	197.796	0.275018	0.117958	-2.3315	0.0197271	0.150436
ENSMUSG00000042010	100705	Acacb	9407.12	-0.151551	0.0650513	2.32972	0.0198208	0.150618
ENSMUSG00000014778	234686	Fhod1	584.816	-0.180147	0.0773123	2.33013	0.0197995	0.150618
ENSMUSG00000026565	18986	Pou2f1	605.969	-0.168179	0.0721897	2.32969	0.0198227	0.150618
ENSMUSG00000038217	380712	Tlcd2	179.496	0.30297	0.129988	-2.33076	0.0197658	0.150618
ENSMUSG00000017146	12189	Brca1	31.2952	0.340306	0.146063	-2.32985	0.0198141	0.150618
ENSMUSG00000059456	19229	Ptk2b	1279.69	-0.222219	0.0953825	2.32977	0.0198183	0.150618
ENSMUSG00000031101	74131	Sash3	71.857	0.340941	0.146323	-2.33005	0.0198033	0.150618
ENSMUSG00000024937	114601	Ehbp1l1	9334.78	-0.187419	0.0804655	2.32918	0.0198493	0.150742
ENSMUSG00000002249	21678	Tead3	755.012	-0.162982	0.0699927	2.32855	0.0198828	0.150918
ENSMUSG00000004151	14009	Etv1	548.129	-0.187299	0.0804504	2.32813	0.0199054	0.151012
ENSMUSG00000019907	17931	Ppp1r12a	2067.5	-0.132242	0.0568198	2.32739	0.0199443	0.151229
ENSMUSG00000049940	70804	Pgrmc2	2304.15	-0.136083	0.0584888	2.32664	0.0199842	0.151453
ENSMUSG00000024548	240427	Setbp1	1225.36	-0.189338	0.081427	2.32524	0.0200589	0.151941
ENSMUSG00000033715	105387	Akr1c14	276.793	0.263666	0.113415	-2.32479	0.0200834	0.152048
ENSMUSG00000026355	17219	Mcm6	119.107	0.333711	0.143605	-2.32382	0.0201354	0.152363
ENSMUSG00000007827	232339	Ankrd26	255.508	0.252431	0.108675	-2.3228	0.0201897	0.152696
ENSMUSG00000040466	233016	Blvrb	621.929	0.186088	0.0801901	-2.32059	0.0203092	0.153521
ENSMUSG00000002346	73095	Slc25a42	1571.17	-0.219002	0.0944106	2.31968	0.0203584	0.153813
ENSMUSG00000039382	54636	Wdr45	1046.31	-0.165362	0.0713019	2.31919	0.0203849	0.153934
ENSMUSG00000020620	27404	Abca8b	1033.19	0.192233	0.0828956	-2.31897	0.0203966	0.153943
ENSMUSG00000040249	16971	Lrp1	21008.3	0.217803	0.0939647	-2.31793	0.0204533	0.153996
ENSMUSG00000031024	76954	St5	1160.95	0.165296	0.0713082	-2.31805	0.0204466	0.153996
ENSMUSG00000028982	70556	Slc25a33	531.527	-0.220841	0.095256	2.31839	0.0204281	0.153996
ENSMUSG00000021760	69590	Gpx8	1021.89	0.176791	0.0762728	-2.31788	0.0204559	0.153996
ENSMUSG00000068263	58229	Ccdc48	88.9051	0.31488	0.135916	-2.31672	0.0205188	0.154311
ENSMUSG00000022434	73225	Fam118a	604.988	0.173875	0.0750795	-2.31587	0.0205651	0.15458
ENSMUSG00000022579	68453	Gpihbp1	967.622	0.170441	0.0736125	-2.31539	0.0205917	0.154701
ENSMUSG00000024044	13823	Epb4.1l3	846	0.18701	0.0808354	-2.31347	0.0206968	0.155296
ENSMUSG00000021282	217869	Eif5	4535.43	-0.201661	0.0871871	2.31297	0.0207245	0.155302
ENSMUSG00000042446	67785	Zmym4	1261.08	-0.159867	0.0691153	2.31305	0.02072	0.155302
ENSMUSG00000020376	59044	Rnf130	1490.78	0.15511	0.0670817	-2.31225	0.0207637	0.155367
ENSMUSG00000026678	19737	Rgs5	1758.43	-0.179063	0.077436	2.31241	0.0207553	0.155367
ENSMUSG00000045751	212377	Mms22l	35.0051	0.344655	0.149057	-2.31223	0.020765	0.155367
ENSMUSG00000020823	74136	Sec14l1	4742.94	0.117713	0.0509178	-2.31182	0.0207879	0.155459
ENSMUSG00000036181	50708	Hist1h1c	2507.33	-0.121289	0.0525079	2.30992	0.0208926	0.156163
ENSMUSG00000055681	59042	Cope	2970.3	0.144897	0.0627721	-2.30831	0.0209821	0.156673
ENSMUSG00000050234	14612	Gja4	391.799	0.185478	0.0803973	-2.30702	0.0210537	0.157128
ENSMUSG00000016256	64138	Ctsz	1585.76	0.221651	0.0960963	-2.30656	0.0210796	0.157238
ENSMUSG00000040003	50791	Magi2	236.547	-0.252587	0.109517	2.30637	0.0210898	0.157238
ENSMUSG00000026155	98366	Smap1	378.779	0.20145	0.0873539	-2.30614	0.0211031	0.157257
ENSMUSG00000037129	214531	Tmprss13	76.6426	0.343871	0.149281	-2.30351	0.0212501	0.157315
ENSMUSG00000009076	67178	Zmat5	280.079	0.221941	0.0963322	-2.30392	0.0212273	0.157315
ENSMUSG00000075590	223649	Nrbp2	1387.76	-0.167587	0.0726998	2.30519	0.0211558	0.157315
ENSMUSG00000054693	11487	Adam10	2235.19	0.13868	0.0602036	-2.30352	0.0212498	0.157315
ENSMUSG00000069204	212276	Zfp748	203.542	-0.247527	0.10742	2.30428	0.0212068	0.157315
ENSMUSG00000057766	225187	Ankrd29	234.205	0.23362	0.101416	-2.30357	0.0212468	0.157315
ENSMUSG00000042073	76491	Abhd14b	470.416	-0.219011	0.0949932	2.30554	0.0211364	0.157315
ENSMUSG00000023000	13363	Dhh	61.634	-0.339253	0.147167	2.30522	0.0211541	0.157315
ENSMUSG00000035378	72171	Shq1	110.052	0.284991	0.12369	-2.30407	0.0212187	0.157315
ENSMUSG00000034282	14027	Evpl	128.865	0.313456	0.136034	-2.30424	0.0212091	0.157315
ENSMUSG00000025059	14933	Gyk	723.752	-0.229365	0.0996009	2.30284	0.0212876	0.157364
ENSMUSG00000028859	12986	Csf3r	28.198	0.343922	0.14933	-2.3031	0.021273	0.157364
ENSMUSG00000026579	14067	F5	48.4162	-0.340834	0.148007	2.30282	0.0212889	0.157364
ENSMUSG00000060126	22070	Tpt1	605.69	0.237497	0.103152	-2.3024	0.0213125	0.157459
ENSMUSG00000038005	72612	2700029M09Rik	686.72	0.179052	0.0777905	-2.30172	0.021351	0.157586
ENSMUSG00000091243	73569	Vgll3	202.066	0.232546	0.101026	-2.30185	0.0213434	0.157586
ENSMUSG00000079654	101359	Prrt4	96.4099	-0.316765	0.137661	2.30105	0.021389	0.15777
ENSMUSG00000034460	20474	Six4	201.985	-0.269431	0.117098	2.3009	0.0213974	0.15777
ENSMUSG00000031310	56364	Zmym3	1194.24	-0.164633	0.0715693	2.30033	0.0214298	0.157771
ENSMUSG00000039765	231214	Cc2d2a	921.153	0.175804	0.0764253	-2.30034	0.021429	0.157771
ENSMUSG00000046387	93888	Pcdhb17	181.076	0.266982	0.116048	-2.30062	0.021413	0.157771
ENSMUSG00000031246	56726	Sh3bgrl	1232.32	0.205145	0.089204	-2.29973	0.0214636	0.157782
ENSMUSG00000038975	19352	Rabggtb	2035.88	-0.141725	0.0616244	2.29982	0.0214585	0.157782
ENSMUSG00000020312	216148	Shc2	232.811	0.239294	0.104051	-2.29977	0.0214613	0.157782
ENSMUSG00000020019	57764	Ntn4	585.193	0.196983	0.0856768	-2.29914	0.0214971	0.15795
ENSMUSG00000045636	102103	Mtus1	9503.09	-0.12987	0.0565346	2.29717	0.0216091	0.158693
ENSMUSG00000036990	73945	Otud4	2243.23	-0.174617	0.0760508	2.29606	0.0216723	0.159078
ENSMUSG00000058447	330502	Zfp82	92.6164	-0.317855	0.138492	2.29511	0.0217267	0.159398
ENSMUSG00000028807	73680	Zbtb8a	307.016	0.21304	0.0928531	-2.29438	0.0217688	0.159547
ENSMUSG00000027677	67120	Ttc14	1165.04	-0.224879	0.0980062	2.29453	0.0217599	0.159547
ENSMUSG00000024959	12015	Bad	425.064	0.181101	0.0789736	-2.29319	0.0218371	0.159968
ENSMUSG00000020009	15979	Ifngr1	2032.42	0.141768	0.0618368	-2.29262	0.0218698	0.160128
ENSMUSG00000037152	66377	Ndufc1	2519.8	0.146012	0.0637046	-2.29202	0.0219044	0.160302
ENSMUSG00000001542	192657	Ell2	471.901	-0.240658	0.105037	2.29118	0.0219532	0.160578
ENSMUSG00000033009	270086	Ogfod1	1540.91	-0.147908	0.0645659	2.29082	0.0219741	0.160651
ENSMUSG00000050608	433771	Minos1	3689.16	0.148929	0.0650292	-2.29019	0.0220103	0.160836
ENSMUSG00000021140	54604	Pcnx	3764.09	-0.137444	0.0600194	2.28999	0.0220218	0.16084
ENSMUSG00000052229	574402	Gpr17	177.892	0.272732	0.119154	-2.2889	0.022085	0.161142
ENSMUSG00000002768	17256	Mea1	584.935	0.172777	0.0754849	-2.2889	0.0220851	0.161142
ENSMUSG00000044937	103220	BC030307	127.695	-0.282822	0.123652	2.28724	0.0221819	0.161615
ENSMUSG00000048376	14062	F2r	2891.9	0.163965	0.0716873	-2.28722	0.0221829	0.161615
ENSMUSG00000025375	11302	Aatk	337.059	-0.223907	0.0979447	2.28606	0.0222508	0.161949
ENSMUSG00000051451	233490	Crebzf	845.827	-0.159716	0.0698614	2.28619	0.0222434	0.161949
ENSMUSG00000030393	22775	Zik1	93.1165	-0.293891	0.128593	2.28544	0.0222872	0.162072
ENSMUSG00000026628	11910	Atf3	3798.77	0.242109	0.105938	-2.28539	0.0222897	0.162072
ENSMUSG00000024238	21417	Zeb1	2865.62	0.124942	0.0546844	-2.28479	0.0223251	0.162249
ENSMUSG00000093585	21417	Zeb1	2865.62	0.124942	0.0546844	-2.28479	0.0223251	0.162249
ENSMUSG00000028917	69582	Plekhm2	2575.09	-0.151282	0.0662629	2.28306	0.0224271	0.162829
ENSMUSG00000007659	12048	Bcl2l1	1194.1	0.180138	0.0789511	-2.28164	0.0225106	0.163355
ENSMUSG00000022629	16564	Kif21a	1255.74	-0.157544	0.0690548	2.28143	0.0225228	0.163363
ENSMUSG00000046818	73284	Ddit4l	273.084	-0.319327	0.13999	2.28107	0.0225444	0.163438
ENSMUSG00000073940	15129	Hbb-b2	1856.22	0.26553	0.116421	-2.28078	0.0225617	0.163483
ENSMUSG00000052305	15129	Hbb-b1	1856.22	0.26553	0.116421	-2.28078	0.0225617	0.163483
ENSMUSG00000026797	20910	Stxbp1	2217.53	0.125263	0.0549319	-2.28034	0.0225874	0.163589
ENSMUSG00000025261	59026	Huwe1	11919	-0.128202	0.056271	2.27829	0.0227093	0.164391
ENSMUSG00000044528	229801	Tram1l1	21.1467	0.333231	0.146293	-2.27783	0.0227367	0.164508
ENSMUSG00000015312	17873	Gadd45b	180.942	-0.257186	0.112922	2.27756	0.0227529	0.164544
ENSMUSG00000051339	243219	2900026A02Rik	3637.39	-0.14805	0.0650209	2.27695	0.022789	0.16466
ENSMUSG00000059327	13607	Eda	335.284	0.201017	0.0882847	-2.27692	0.0227913	0.16466
ENSMUSG00000079588	381339	Tmem182	3266.75	-0.120269	0.0528489	2.27571	0.0228631	0.165098
ENSMUSG00000019082	68267	Slc25a22	1100.85	-0.270127	0.118727	2.2752	0.0228937	0.165156
ENSMUSG00000024030	11307	Abcg1	397.861	0.213257	0.0938399	-2.27256	0.0230529	0.166142
ENSMUSG00000023015	26934	Racgap1	57.8355	0.33926	0.149332	-2.27185	0.0230959	0.16637
ENSMUSG00000038241	16328	Cep250	479.561	0.209009	0.0920224	-2.27128	0.0231297	0.166532
ENSMUSG00000017417	72324	Plxdc1	182.634	0.30564	0.134608	-2.27058	0.0231722	0.166593
ENSMUSG00000056515	106572	Rab31	817.907	0.170919	0.0752709	-2.27072	0.023164	0.166593
ENSMUSG00000026535	26388	Ifi202b	169.56	0.279089	0.122904	-2.27078	0.02316	0.166593
ENSMUSG00000044006	68709	Cilp2	4397.02	0.205915	0.0907052	-2.27015	0.0231983	0.166699
ENSMUSG00000027244	51897	Atg13	1520.42	-0.141425	0.0623217	2.26927	0.0232521	0.166922
ENSMUSG00000038910	224860	Plcl2	650.612	0.158108	0.0696938	-2.26861	0.023292	0.167127
ENSMUSG00000032487	19225	Ptgs2	245.307	0.338459	0.14922	-2.26819	0.0233179	0.167231
ENSMUSG00000025724	56529	Sec11a	923.606	0.183376	0.0808721	-2.26748	0.0233608	0.167375
ENSMUSG00000028656	12331	Cap1	2914.75	0.172426	0.0760561	-2.26708	0.0233852	0.167469
ENSMUSG00000023031	109901	Cela1	15.5753	0.324601	0.143326	-2.26478	0.0235262	0.168396
ENSMUSG00000056201	12631	Cfl1	2525.6	0.159549	0.0704798	-2.26375	0.0235895	0.168767
ENSMUSG00000027248	14827	Pdia3	8693.36	0.148873	0.065786	-2.26299	0.0236361	0.169018
ENSMUSG00000020474	54125	Polm	228.036	-0.241275	0.10669	2.26146	0.0237307	0.169447
ENSMUSG00000067430	73451	Zfp763	112.748	-0.294602	0.13025	2.26182	0.0237084	0.169447
ENSMUSG00000029925	21391	Tbxas1	97.8289	0.293391	0.129726	-2.26163	0.0237203	0.169447
ENSMUSG00000022286	252973	Grhl2	125.233	-0.310545	0.137348	2.26101	0.0237584	0.169563
ENSMUSG00000025374	69917	Obfc2b	1119.75	0.142834	0.0631832	-2.26063	0.0237824	0.169651
ENSMUSG00000050440	84506	Hamp	295.298	-0.337535	0.149329	2.26035	0.0237998	0.169693
ENSMUSG00000025492	66141	Ifitm3	2550.63	0.194091	0.0858934	-2.25967	0.0238419	0.169911
ENSMUSG00000048371	382051	Pdp2	414.289	-0.191088	0.0845803	2.25925	0.023868	0.170015
ENSMUSG00000090877	15511	Hspa1b	868.4	0.259468	0.114888	-2.25844	0.0239182	0.17029
ENSMUSG00000020914	21973	Top2a	80.4302	0.262454	0.116234	-2.25798	0.0239468	0.170411
ENSMUSG00000026305	16978	Lrrfip1	3418.46	-0.144251	0.0639193	2.25677	0.0240224	0.170866
ENSMUSG00000039100	223455	March6	5641.56	-0.141304	0.0626325	2.25608	0.0240659	0.171093
ENSMUSG00000019769	64009	Syne1	4091.09	-0.172002	0.0762609	2.25544	0.0241057	0.171293
ENSMUSG00000025779	17087	Ly96	54.3767	0.323952	0.143701	-2.25434	0.0241745	0.171645
ENSMUSG00000030380	109889	Mzf1	19.2595	-0.323468	0.143491	2.25428	0.0241787	0.171645
ENSMUSG00000021712	81003	Trim23	575.411	-0.202415	0.0898221	2.25351	0.0242268	0.171904
ENSMUSG00000027303	19262	Ptpra	2045.08	0.141334	0.0627276	-2.25314	0.0242505	0.171989
ENSMUSG00000025986	227059	Slc39a10	531.996	0.182168	0.0808801	-2.25233	0.0243017	0.172269
ENSMUSG00000044712	625098	Slc38a6	120.758	0.293048	0.130132	-2.25192	0.024327	0.172365
ENSMUSG00000048264	208440	Dip2c	4086.17	-0.127544	0.0566488	2.25149	0.0243544	0.172476
ENSMUSG00000049241	243270	Gpr81	63.1492	-0.244081	0.108428	2.25108	0.0243807	0.172579
ENSMUSG00000053877	100043597	Srcap	5873.95	-0.129837	0.0576982	2.25028	0.024431	0.172764
ENSMUSG00000031983	69551	2310022B05Rik	4166.4	-0.130874	0.0581632	2.25011	0.0244421	0.172764
ENSMUSG00000010406	68836	Mrpl52	730.446	0.164711	0.0731957	-2.25028	0.0244311	0.172764
ENSMUSG00000034459	15957	Ifit1	98.9509	0.301245	0.133942	-2.24908	0.0245075	0.172861
ENSMUSG00000002741	56418	Ykt6	2470.21	0.120465	0.0535628	-2.24905	0.0245095	0.172861
ENSMUSG00000040985	194974	Sun3	14.908	0.317481	0.141168	-2.24897	0.0245146	0.172861
ENSMUSG00000029580	11461	Actb	18483.6	0.217119	0.0965228	-2.24941	0.0244865	0.172861
ENSMUSG00000042472	52708	Zfp410	849.497	0.166499	0.0740233	-2.24928	0.0244946	0.172861
ENSMUSG00000024743	54525	Syt7	2762.63	-0.187961	0.0836009	2.24831	0.0245563	0.173072
ENSMUSG00000029465	56378	Arpc3	2107.91	0.167048	0.0743346	-2.24724	0.0246245	0.173386
ENSMUSG00000032363	108153	Adamts7	820.543	0.163555	0.0727804	-2.24724	0.0246245	0.173386
ENSMUSG00000038569	231724	Rad9b	44.4924	-0.328918	0.146383	2.24697	0.024642	0.173426
ENSMUSG00000068284	207806	Gm608	1585.64	-0.132554	0.0590057	2.24647	0.0246741	0.173569
ENSMUSG00000063229	16828	Ldha	10429.2	0.100525	0.0447803	-2.24485	0.0247778	0.174215
ENSMUSG00000029312	246293	Klhl8	477.614	0.174347	0.0776776	-2.2445	0.0248004	0.174291
ENSMUSG00000043252	100201	Tmem64	1714.61	0.128327	0.0571919	-2.2438	0.0248455	0.174441
ENSMUSG00000021732	14165	Fgf10	154.631	0.269942	0.120368	-2.24263	0.0249207	0.174886
ENSMUSG00000031616	13617	Ednra	3543.87	-0.15395	0.0686788	2.2416	0.0249871	0.1751
ENSMUSG00000078816	18752	Prkcc	115.677	-0.287012	0.128033	2.24171	0.0249803	0.1751
ENSMUSG00000022622	11434	Acr	14.1667	-0.317801	0.141764	2.24175	0.0249772	0.1751
ENSMUSG00000016984	68145	Etaa1	109.192	-0.295748	0.131988	2.24073	0.0250436	0.175329
ENSMUSG00000039016	30057	Timm8b	1339.57	0.143996	0.0642582	-2.24089	0.025033	0.175329
ENSMUSG00000038502	84113	Ptov1	2252.57	0.169557	0.0756848	-2.24031	0.0250709	0.175399
ENSMUSG00000074582	99371	Arfgef2	2832.7	-0.136022	0.0607334	2.23966	0.0251132	0.175399
ENSMUSG00000018999	58246	Slc35b4	741.094	0.182202	0.0813343	-2.24017	0.0250801	0.175399
ENSMUSG00000029777	353172	Gars	3474.85	0.105606	0.0471506	-2.23975	0.025107	0.175399
ENSMUSG00000040675	270685	Mthfd1l	96.1192	0.330085	0.147473	-2.23827	0.0252037	0.175947
ENSMUSG00000027667	67778	Zfp639	599.668	-0.168945	0.0754924	2.23791	0.0252268	0.176024
ENSMUSG00000028060	74200	2810403A07Rik	1787.38	-0.146498	0.0654998	2.23661	0.0253117	0.176533
[truncated: 15,566 more rows]
