# Supplementary material for: An atrial fibrillation-associated regulatory region modulates cardiac Tbx5 levels and arrhythmia susceptibility
Source: eLife. 2023 Jan 30;12:e80317. doi: 10.7554/eLife.80317 (PMC9928424; doi:10.7554/eLife.80317)
Supplement: Supplementary file 8. [file elife-80317-supp8.xlsx]

## Sheet: Sheet1
Supplemental file 8. Deletion locations (mm10)
Mouse Line	Coordinates
RE(int)	chr5:119,874,013-119,880,148
RE(down)	chr5:119,891,017-119,915,744
