# Supplementary figures and images for: An atrial fibrillation-associated regulatory region modulates cardiac Tbx5 levels and arrhythmia susceptibility
Source: eLife journal article supplement (doi:10.7554/elife.80317), 2023-01-30

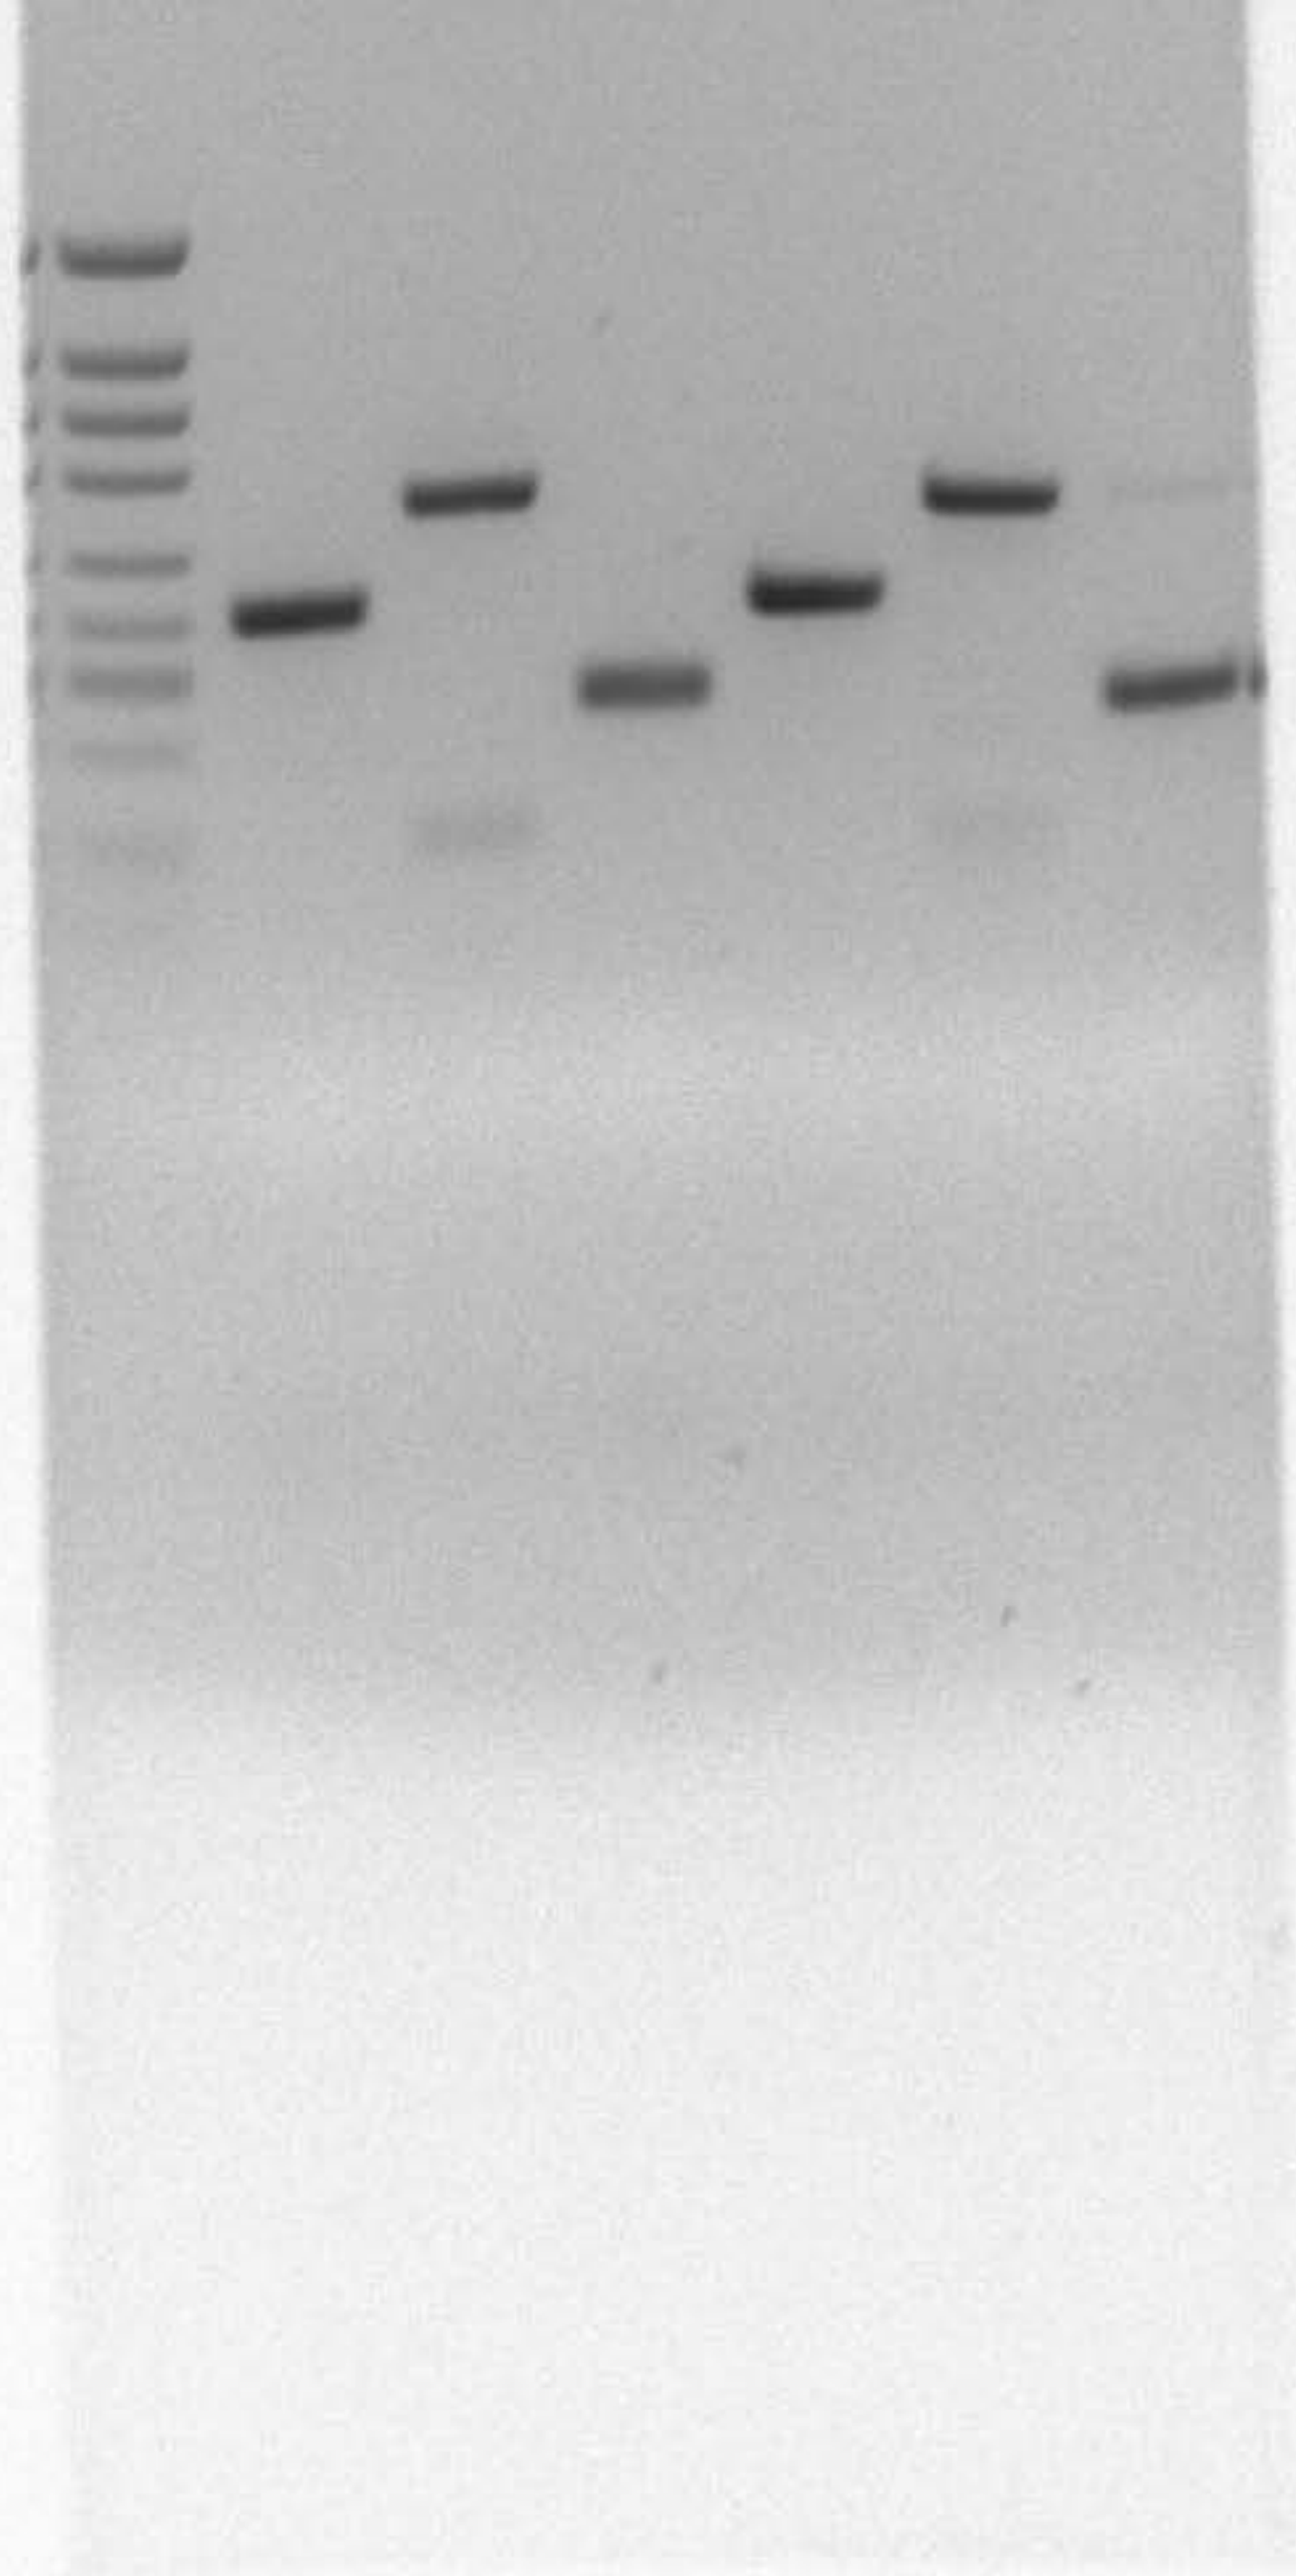

Supplement: fig2-figsupp3-data1 [file elife-80317-fig2-figsupp3-data1-v2.zip]

Figure 1-figure supplement 1

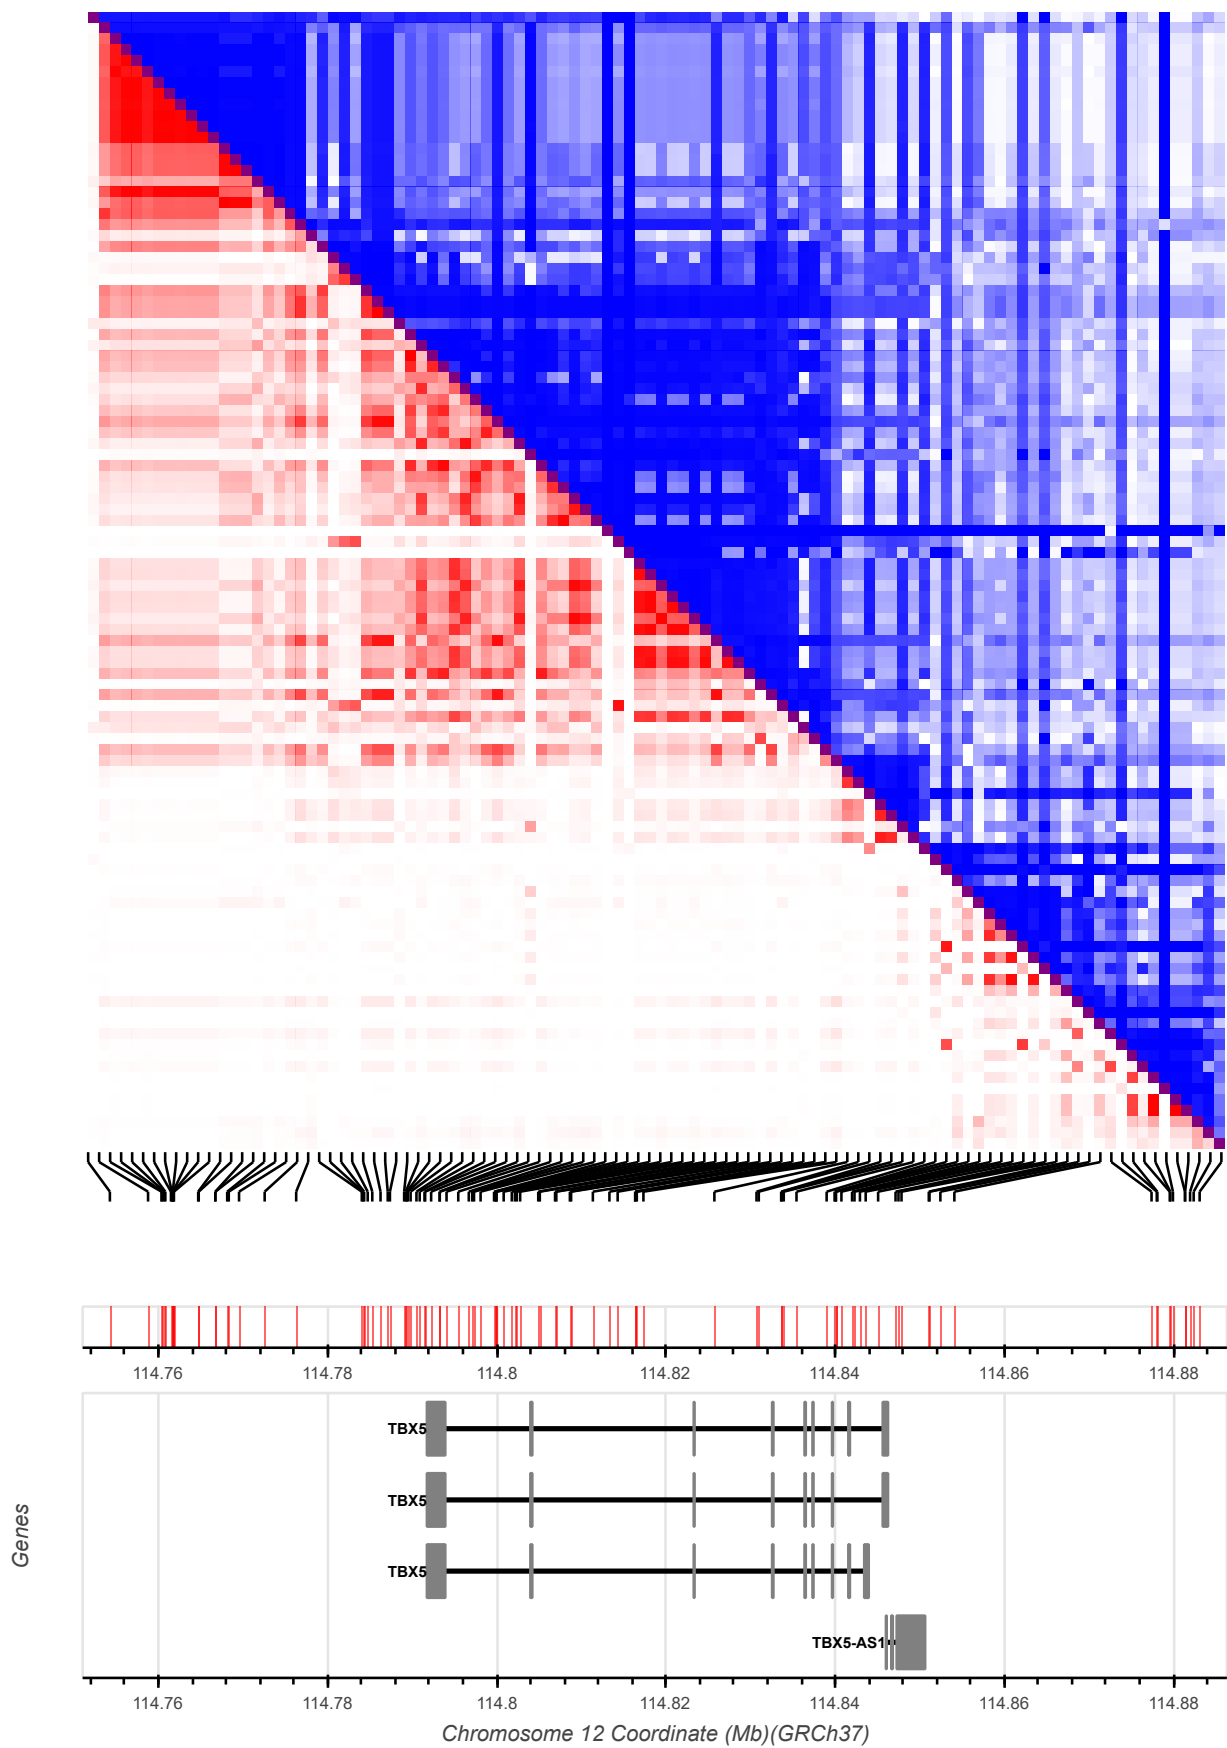

Supplement: supp [file elife_poa_e80317_Figure_1_figure_supplement_1.pdf › elife_poa_e80317_Figure_1_figure_supplement_1.pdf]

Figure 2-figure supplement 1

A

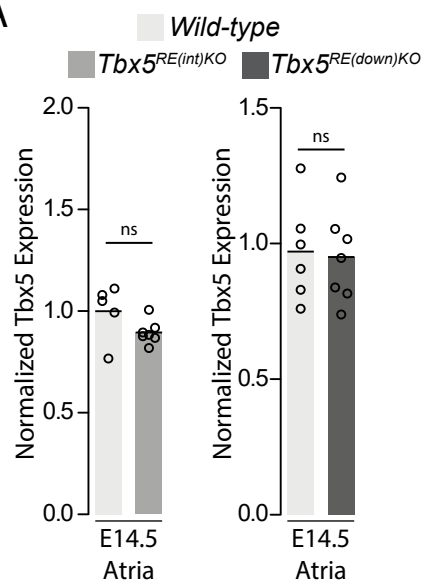

B

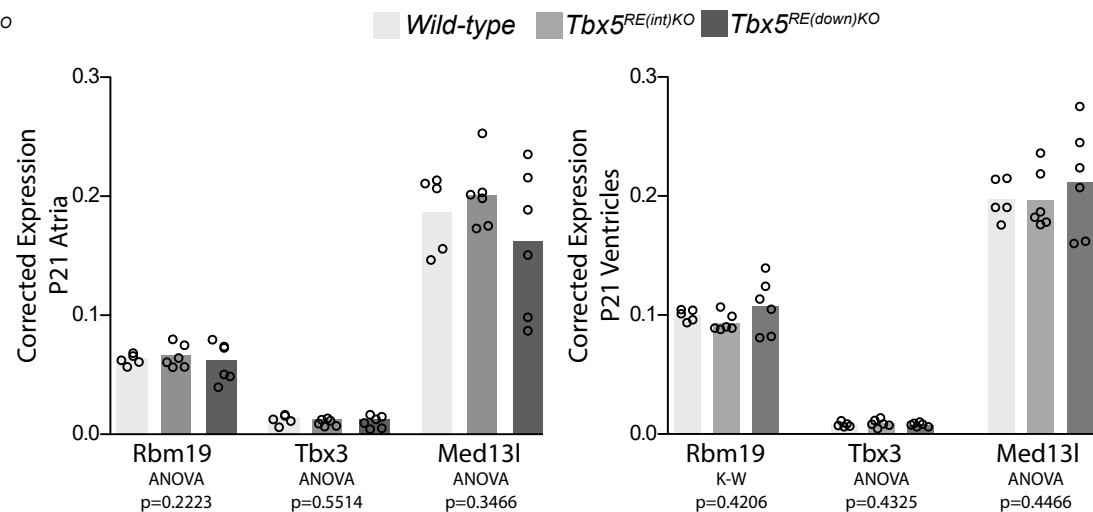

Supplement: supp [file elife_poa_e80317_Figure_2_figure_supplement_1.pdf › elife_poa_e80317_Figure_2_figure_supplement_1.pdf]

Figure 2-figure supplement 2

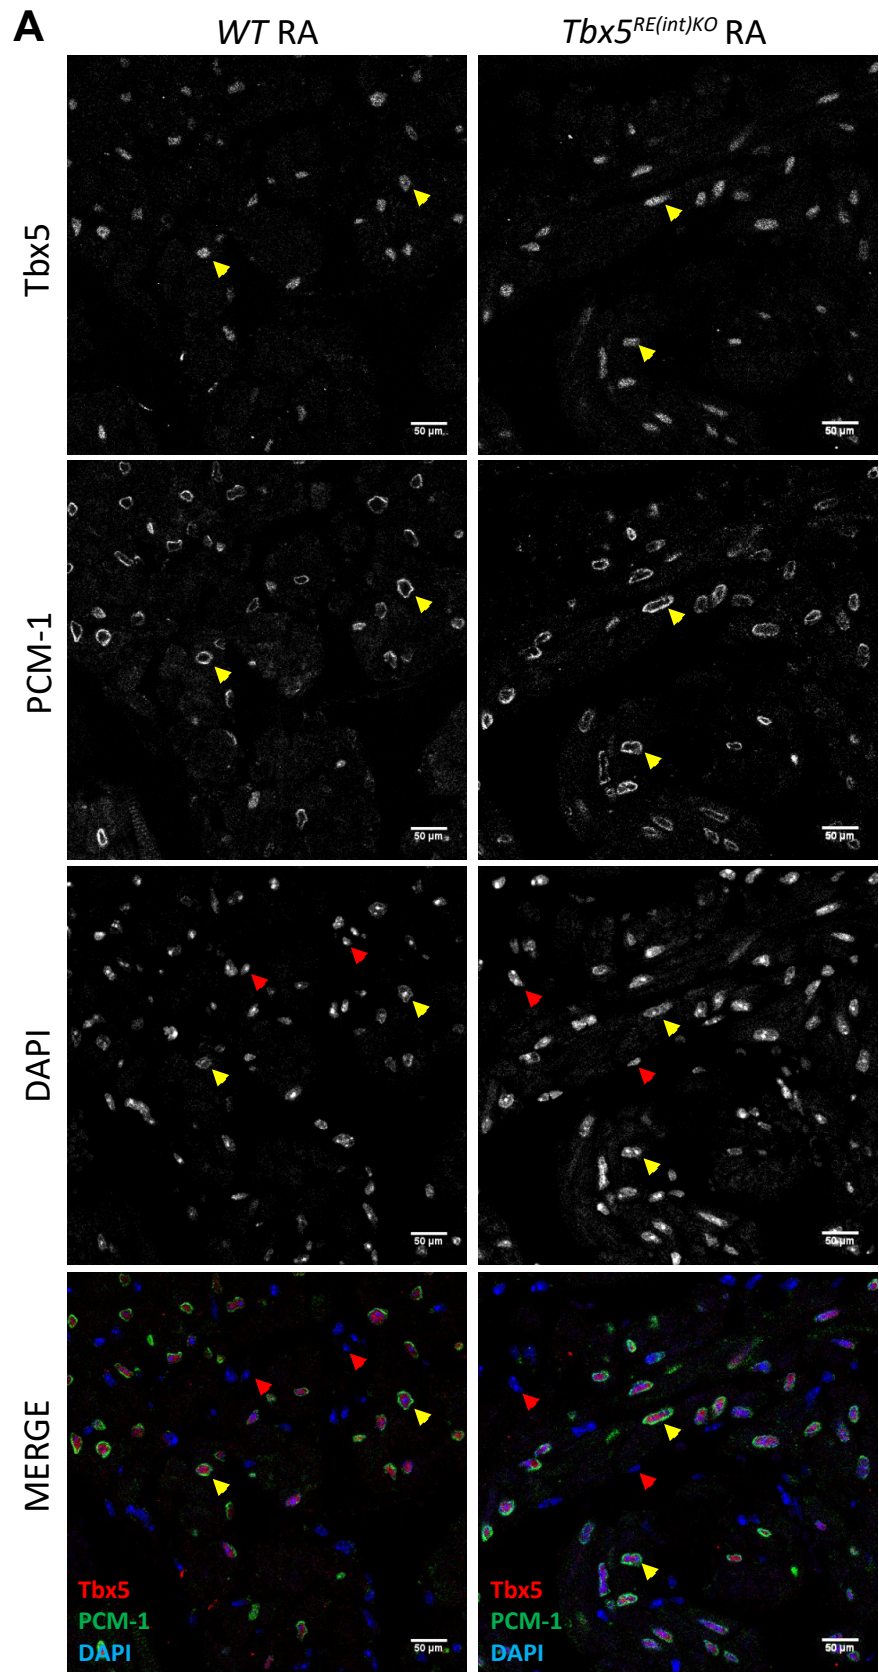

Supplement: supp [file elife_poa_e80317_Figure_2_figure_supplement_2.pdf › elife_poa_e80317_Figure_2_figure_supplement_2.pdf]

Figure 2-figure supplement 3

A

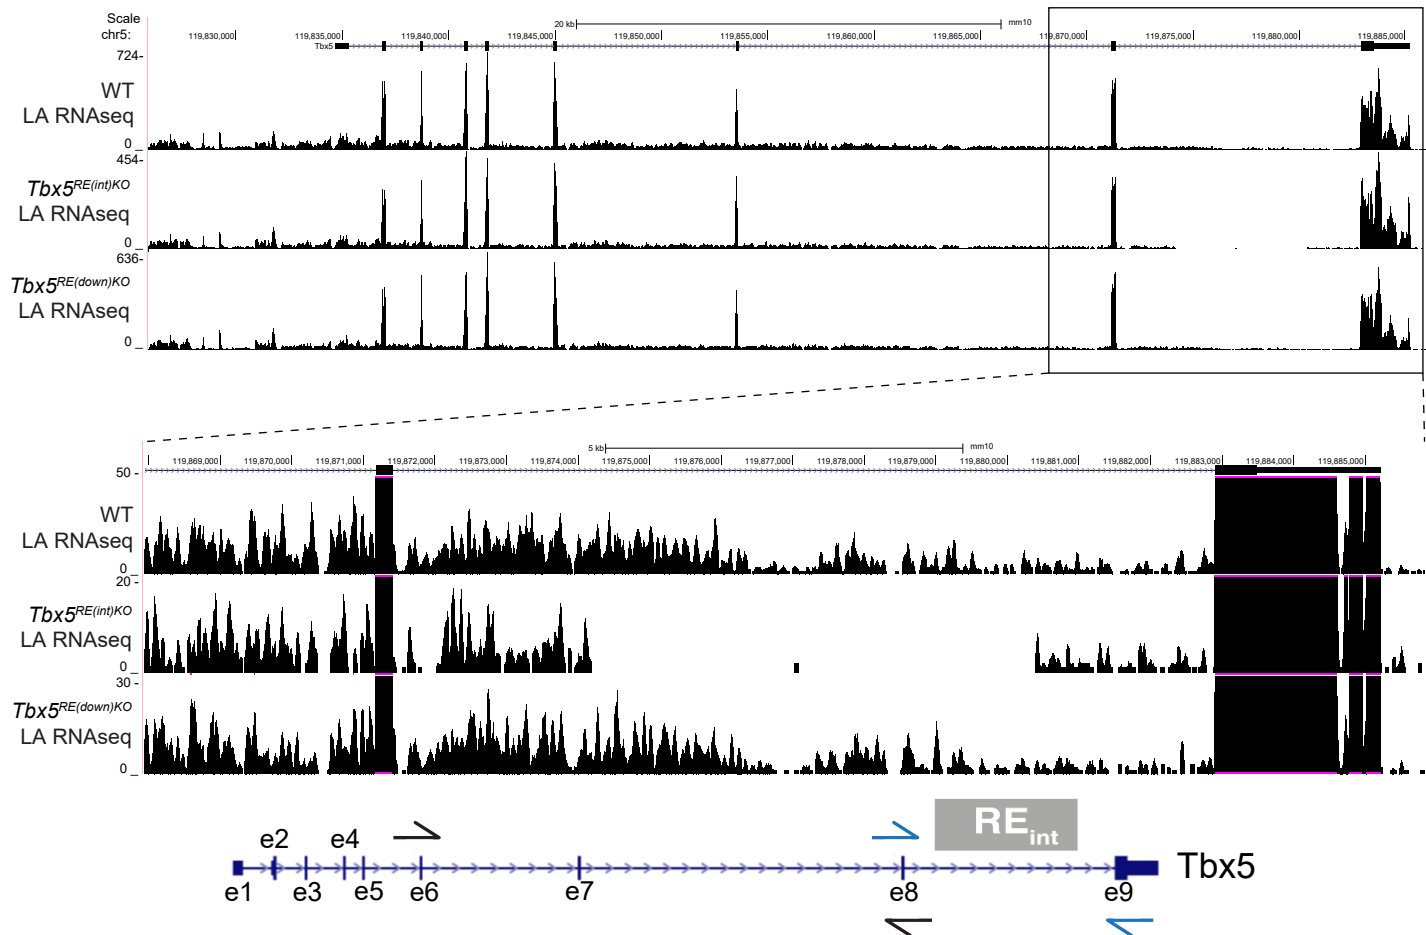

B

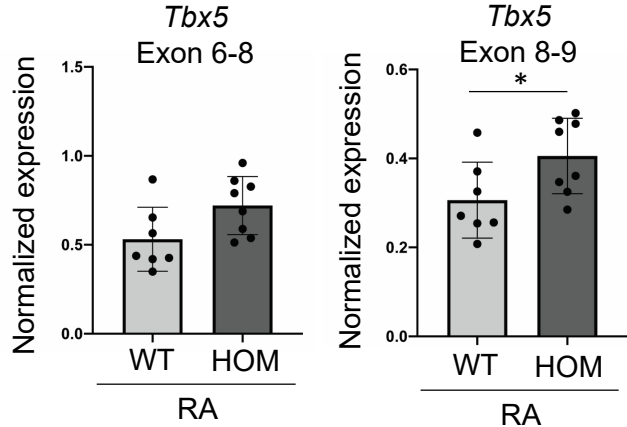

C

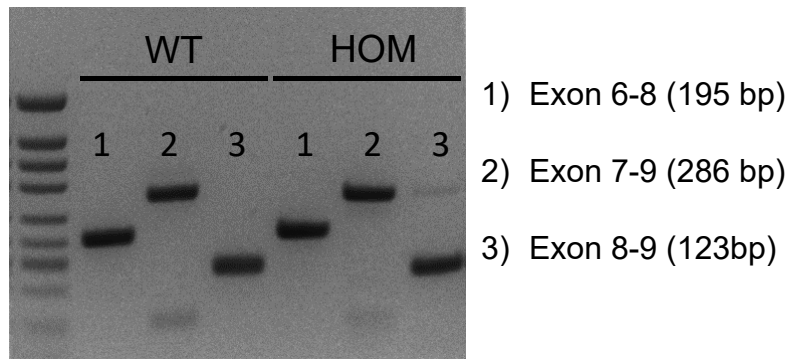

Supplement: supp [file elife_poa_e80317_Figure_2_figure_supplement_3.pdf › elife_poa_e80317_Figure_2_figure_supplement_3.pdf]

Figure 3-figure supplement 1

A

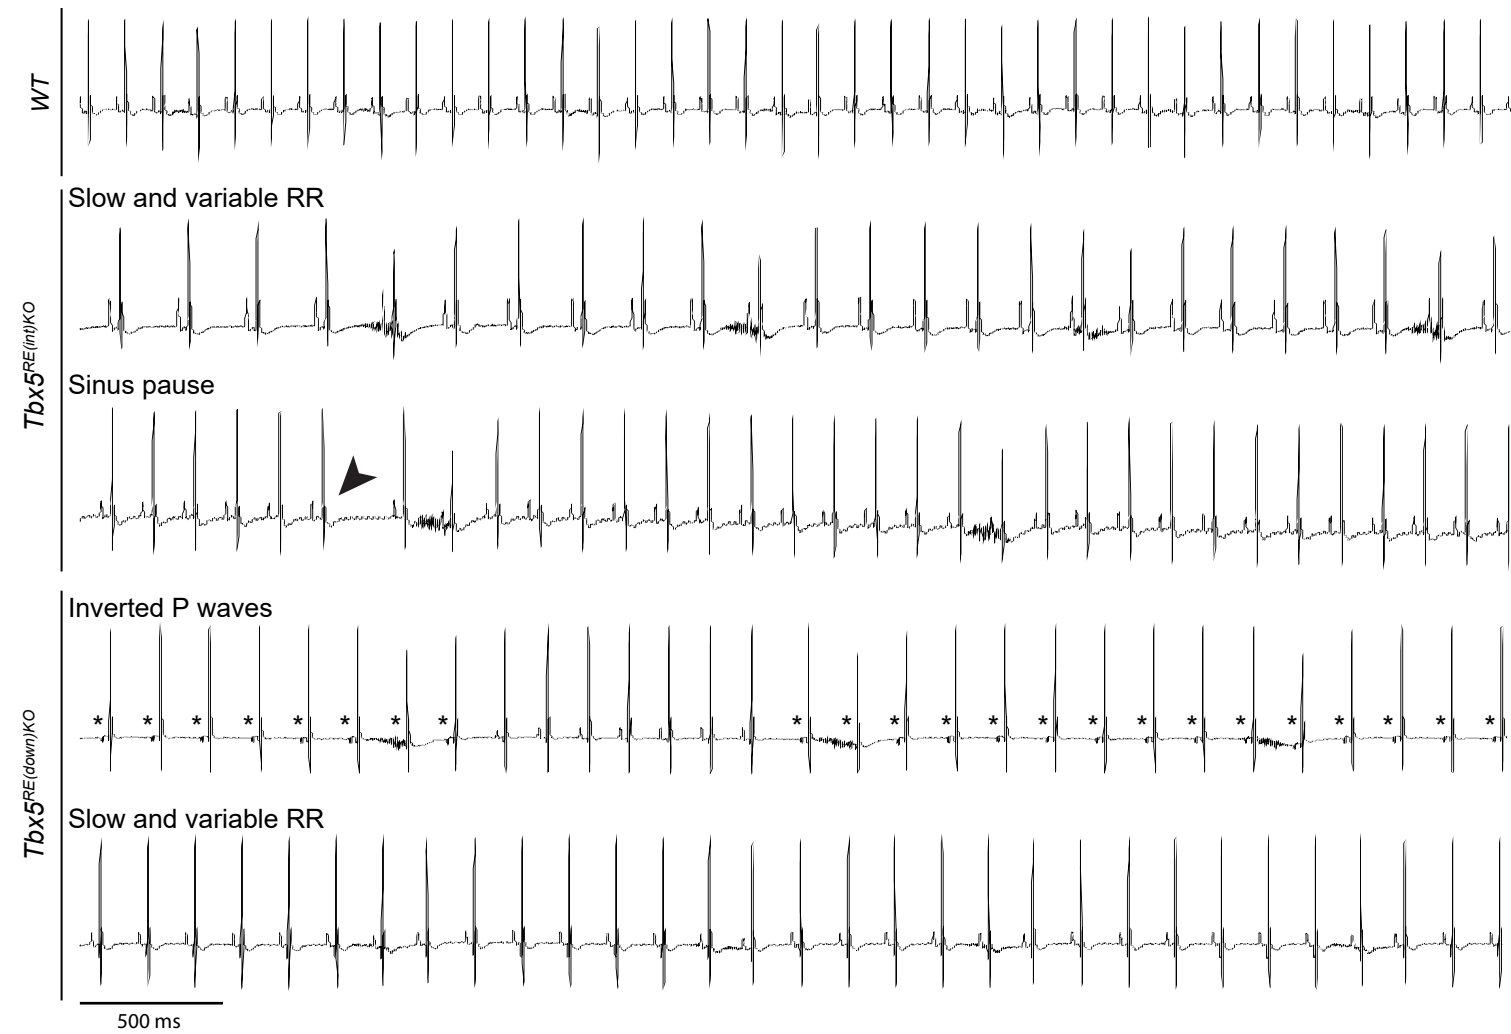

B

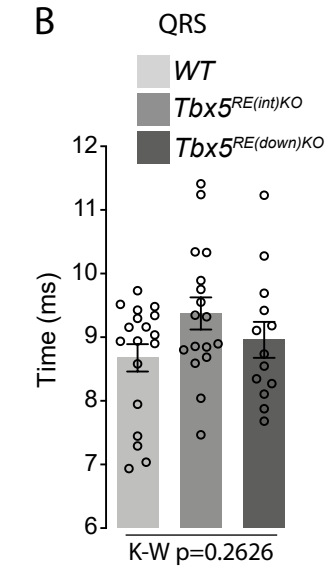

Supplement: supp [file elife_poa_e80317_Figure_3_figure_supplement_1.pdf › elife_poa_e80317_Figure_3_figure_supplement_1.pdf]

Figure 6-figure supplement 1

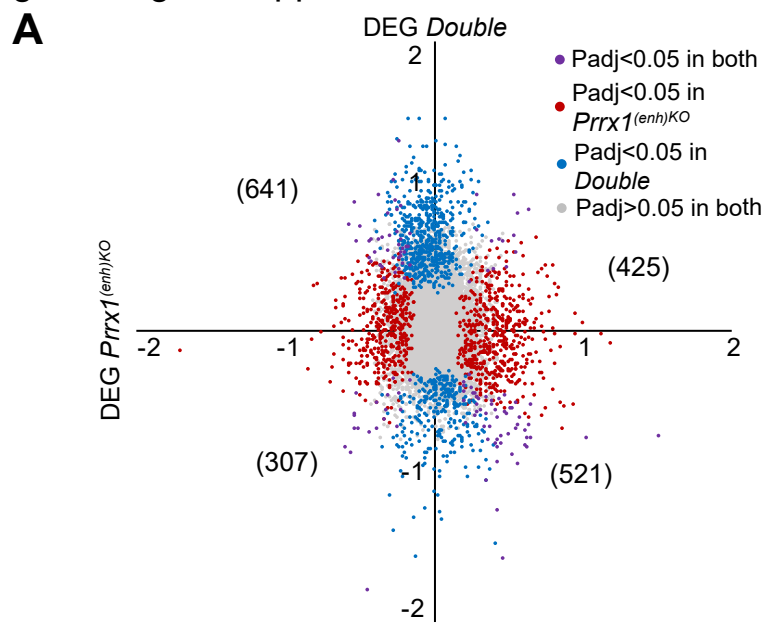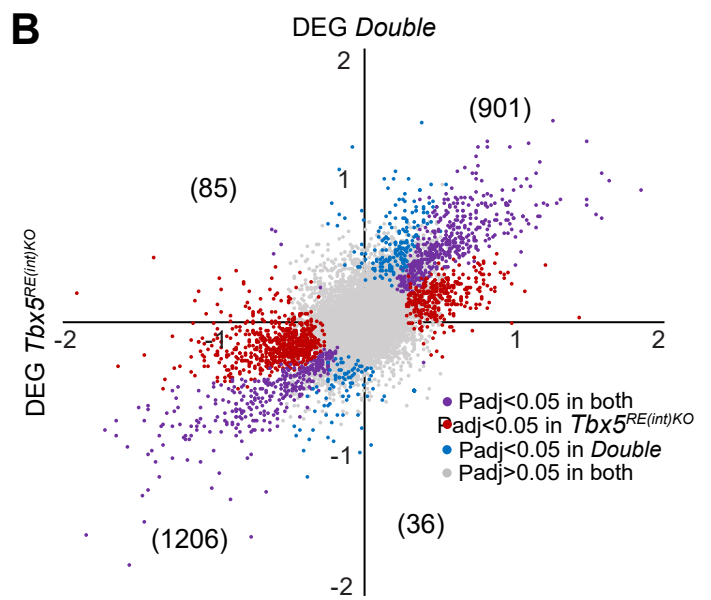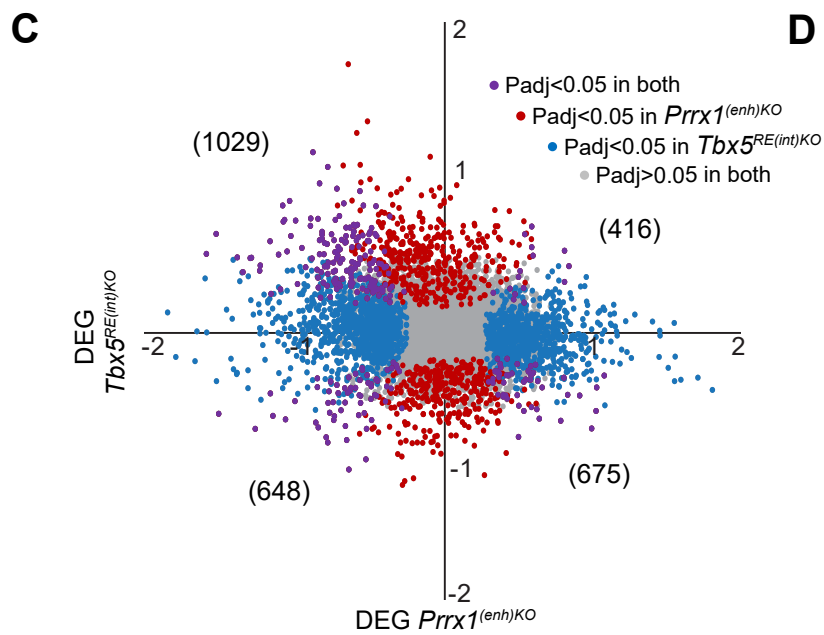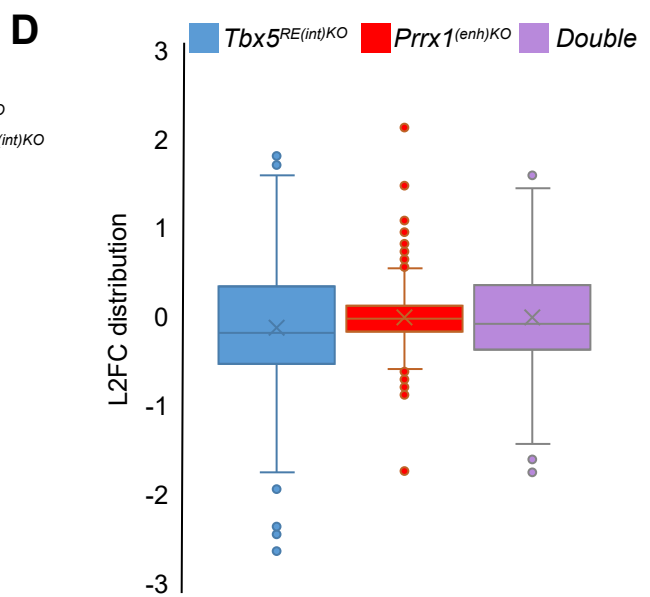

Supplement: supp [file elife_poa_e80317_Figure_5_figure_supplement_1.pdf › elife_poa_e80317_Figure_5_figure_supplement_1.pdf]

Figure 5-figure supplement 2

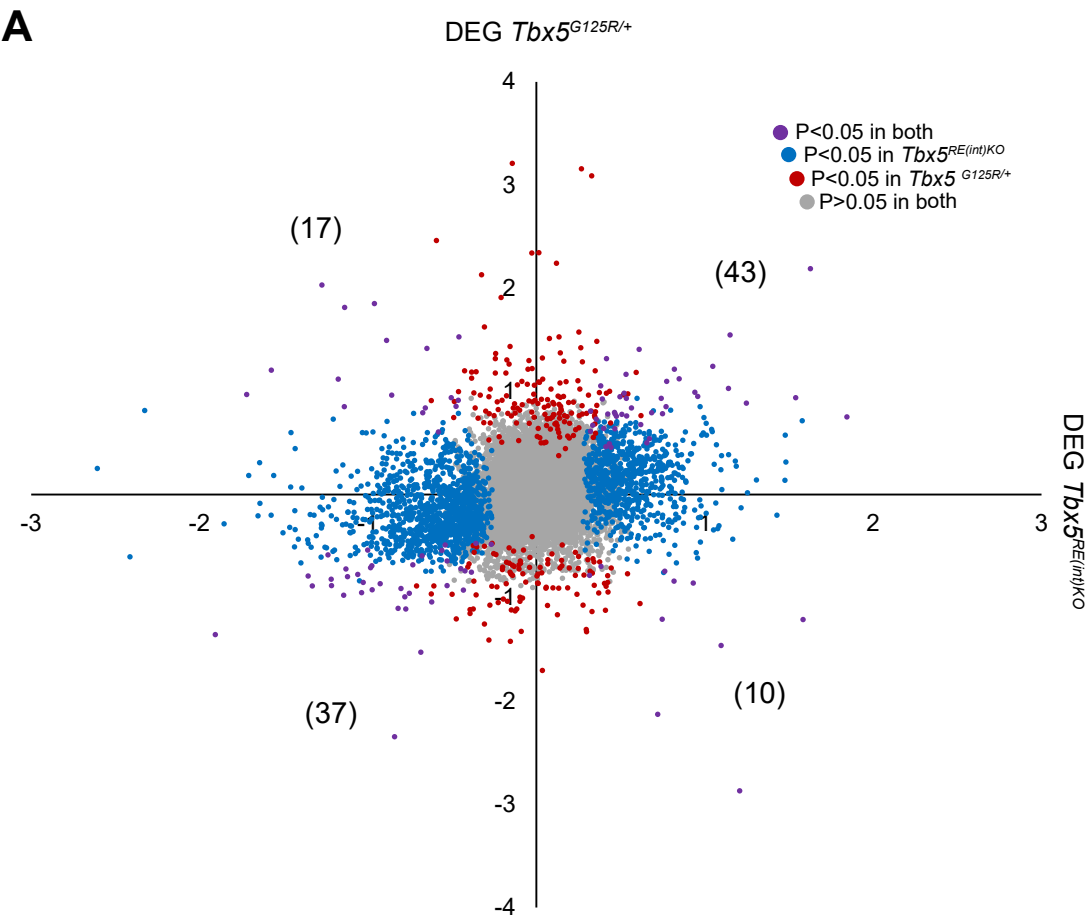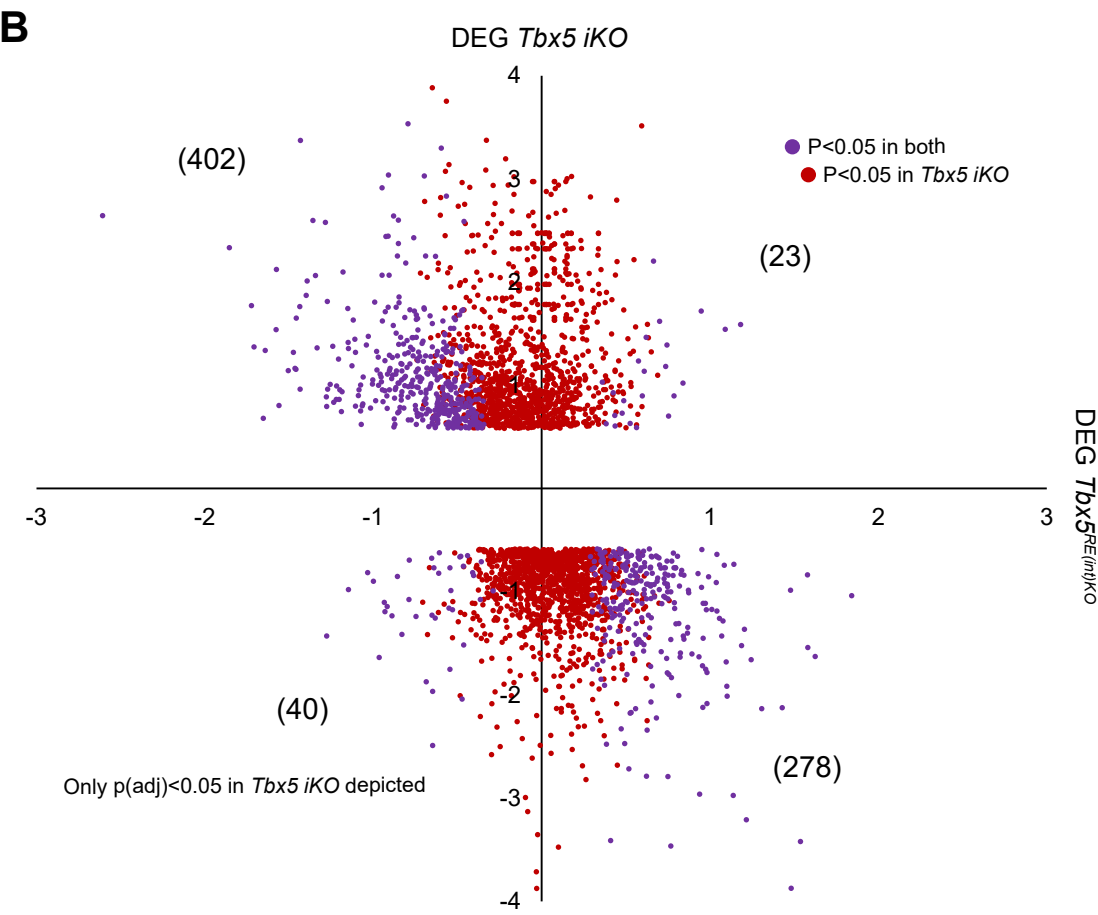

Supplement: supp [file elife_poa_e80317_Figure_5_figure_supplement_2.pdf › elife_poa_e80317_Figure_5_figure_supplement_2.pdf]

Figure 5-figure supplement 3

A

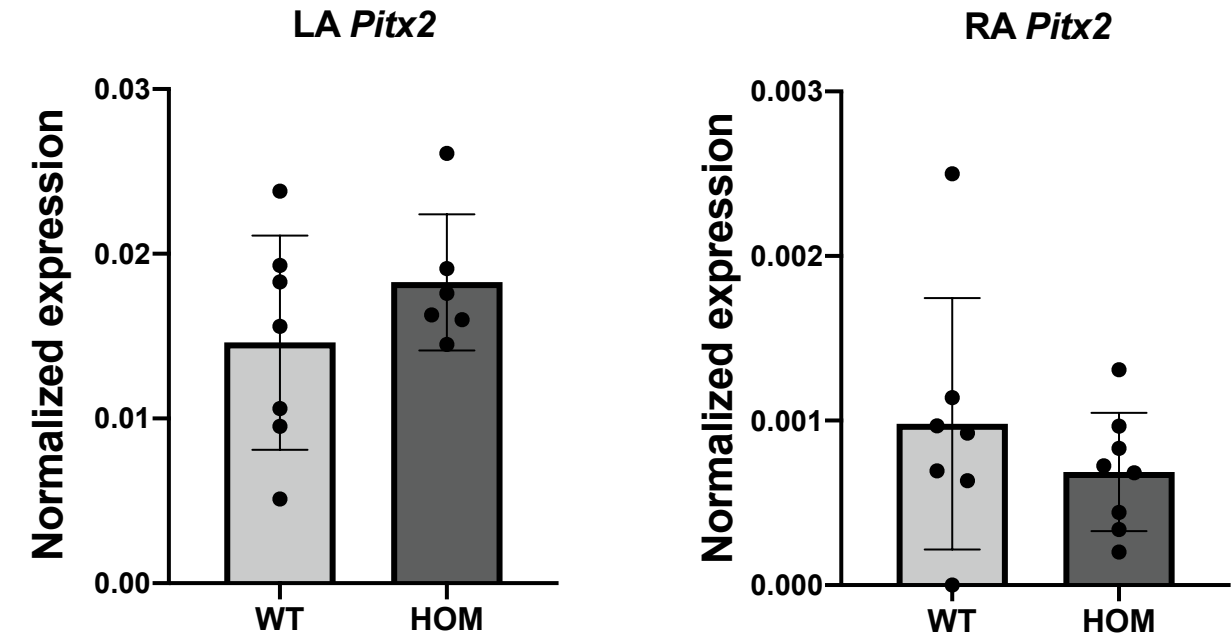

Supplement: supp [file elife_poa_e80317_Figure_5_figure_supplement_3.pdf › elife_poa_e80317_Figure_5_figure_supplement_3.pdf]

Figure 5-figure supplement 4

A

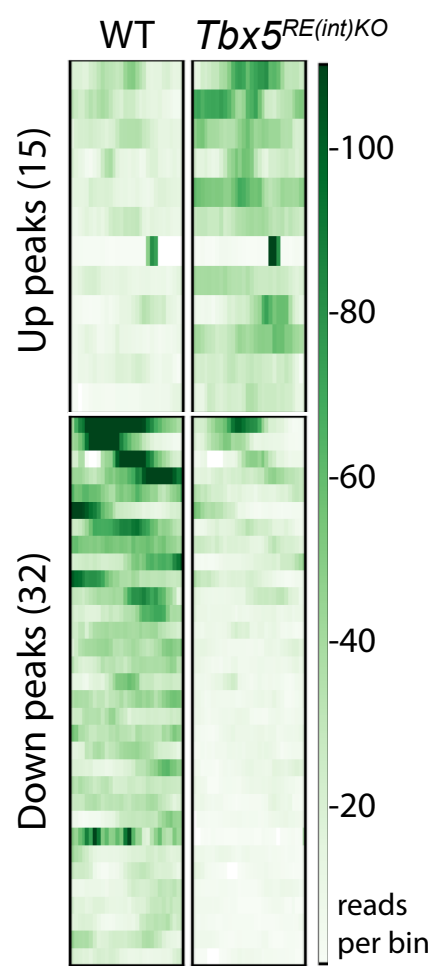

B

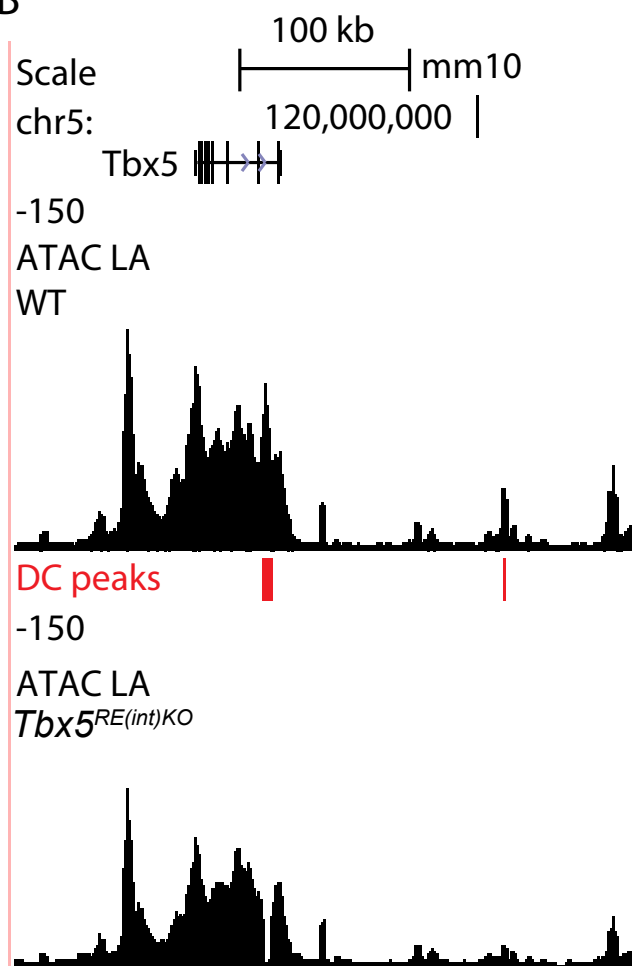

Supplement: supp [file elife_poa_e80317_Figure_5_figure_supplement_4.pdf › elife_poa_e80317_Figure_5_figure_supplement_4.pdf]
